# Supplementary material for: Neutrophil to lymphocyte ratio and cancer prognosis: an umbrella review of systematic reviews and meta-analyses of observational studies
Source: PubMed Central journal article supplement (PMC7678319; doi:10.1186/s12916-020-01817-1), 2020-11-20
Supplement: 12916_2020_1817_MOESM1_ESM.pdf [file 12916_2020_1817_MOESM1_ESM.pdf]

## Appendix A: Search Strategy

### Concept 1

Neutrophils, Neutrophil to Lymphocyte Ratio

### Concept 2

Cancer, Carcinoma, Neoplasia, Tumour, Neoplasm

### Concept 3

Systematic reviews

### EMBASE CLASSIC+EMBASE

1947 to 2020 May 29:

Searched on 30 May 2020 Using search filter “Embase systematic review strategy” from BMJ Clinical Evidence.<sup>1</sup>

Number of results: 1099.

```
1 (neutrophil* or NLR).mp.
2 exp neutrophil/ or exp neutrophil count/
3 1 or 2
4 (cancer or carcinoma or neoplasia or tumor or tumour or neoplasm*).mp.
5 exp neoplasm/
6 4 or 5
7 3 and 6
8 exp review/
9 (literature adj3 review$).ti,ab.
10 exp meta analysis/
11 exp "Systematic Review"/
12 8 or 9 or 10 or 11
13 (medline or medlars or embase or pubmed or cinahl or amed or psychlit or psyclit or psychinfo or psycinfo or scisearch or cochrane).ti,ab.
14 RETRACTED ARTICLE/
15 13 or 14
16 12 and 15
17 (systematic$ adj2 (review$ or overview)).ti,ab.
18 (meta?anal$ or meta anal$ or meta-anal$ or metaanal$ or metanal$).ti,ab.
19 16 or 17 or 18
20 7 and 19
```

**OID MEDLINE® EPUB AHEAD OF PRINT, IN-PROCESS & OTHER NON-INDEXED CITATIONS,  
OID MEDLINE® DAILY AND OVID MEDLINE®**

1946 to 2020 May 29:

Searched on 30 May 2020 Using search filter “Embase systematic review strategy” from BMJ Clinical Evidence.

Number of results: 588.

- 1 (neutrophil\* or NLR).mp.
- 2 exp Neutrophils/
- 3 1 or 2
- 4 (cancer or carcinoma or neoplasia or tumor or tumour or neoplasm\*).mp.
- 5 exp Neoplasms/
- 6 4 or 5
- 7 3 and 6
- 8 (review or review,tutorial or review, academic).pt.
- 9 (medline or medlars or embase or pubmed or cochrane).tw,sh.
- 10 (scisearch or psychinfo or psycinfo).tw,sh.
- 11 (psyclit or psyclit).tw,sh.
- 12 cinahl.tw,sh.
- 13 ((hand adj2 search\$) or (manual\$ adj2 search\$)).tw,sh.
- 14 (electronic database\$ or bibliographic database\$ or computeri?ed database\$ or online database\$).tw,sh.
  
- 15 (pooling or pooled or mantel haenszel).tw,sh.
- 16 (peto or dersimonian or der simonian or fixed effect).tw,sh.
- 17 (retraction of publication or retracted publication).pt.
- 18 9 or 10 or 11 or 12 or 13 or 14 or 15 or 16 or 17
- 19 8 and 18
- 20 meta-analysis.pt.
- 21 exp Meta-Analysis/
- 22 (meta-analys\$ or meta analys\$ or metaanalys\$).tw,sh.
- 23 (systematic\$ adj5 review\$).tw,sh.
- 24 (systematic\$ adj5 overview\$).tw,sh.
- 25 (quantitativ\$ adj5 review\$).tw,sh.
- 26 (quantitativ\$ adj5 overview\$).tw,sh.
- 27 (quantitativ\$ adj5 synthesis\$).tw,sh.
- 28 (methodologic\$ adj5 review\$).tw,sh.
- 29 (methodologic\$ adj5 overview\$).tw,sh.
- 30 (integrative research review\$ or research integration).tw.
- 31 20 or 21 or 22 or 23 or 24 or 25 or 26 or 27 or 28 or 29 or 30
- 32 19 or 31
- 33 7 and 32

## COCHRANE

Issue 5 or 12, May 2020 (Only reviewing results from Cochrane Database of Systematic Reviews)

Searched on 30 May 2020. Number of results: 180.

- 1 neutrophil\* or NLR
- 2 MeSH descriptor: [Neutrophils] explode all trees
- 3 #1 or #2
- 4 cancer or carcinoma or neoplasia or tumor or tumour or neoplasm\*
- 5 MeSH descriptor: [Neoplasms] explode all trees
- 6 #4 or #5
- 7 #3 and #6

### References

1. BMJ Clinical Evidence. Study Design Search Filters [Internet]. *BMJ*. Available from: <http://clinicalevidence.bmj.com/x/set/static/ebm/learn/665076.html>

## Appendix B: 517 extracted meta-analyses with exclusions identified

| Author     | Year | Biomarker | Cancer site        | meta-analysis metric | N  | Sample size (HNLR/LNLR) | Pooled HR        | Notes                                       |
|------------|------|-----------|--------------------|----------------------|----|-------------------------|------------------|---------------------------------------------|
| Boissier R | 2017 | NLR       | Renal Localised    | OS                   | 3  | 1168 (403/651)*         | 1.46 (0.85-2.50) |                                             |
| Boissier R | 2017 | NLR       | Renal Advanced     | OS                   | 7  | 1304 (331/337)*         | 1.55 (1.36-1.76) |                                             |
| Boissier R | 2017 | NLR       | Renal Localised    | RFS                  | 6  | 1962 (487/817)*         | 1.63 (1.15-2.29) |                                             |
| Boissier R | 2017 | NLR       | Renal Advanced     | PFS                  | 3  | 306 (143/163)           | 3.19 (2.23-4.57) |                                             |
| Bowen RC   | 2017 | NLR       | Hepatocellular     | OS                   | NA | 8337                    | 1.40 (1.30-1.52) | Does not include complete data for analysis |
| Bowen RC   | 2017 | NLR       | Hepatocellular     | DFS                  | NA | 3802                    | 1.71 (1.40-2.09) | Does not include complete data for analysis |
| Bowen RC   | 2017 | NLR       | Hepatocellular     | PFS                  | NA | 266                     | 1.36 (1.01-1.84) | Does not include complete data for analysis |
| Bowen RC   | 2017 | NLR       | Pancreatic         | OS                   | NA | 4381                    | 1.90 (1.43-2.52) | Does not include complete data for analysis |
| Bowen RC   | 2017 | NLR       | Pancreatic         | CSS                  | NA | 261                     | 2.53 (1.64-3.91) | Does not include complete data for analysis |
| Bowen RC   | 2017 | NLR       | Pancreatic         | DFS                  | NA | 460                     | 2.19 (0.51-9.34) | Does not include complete data for analysis |
| Bowen RC   | 2017 | NLR       | Gastric            | OS                   | NA | 10559                   | 1.47 (1.25-1.72) | Does not include complete data for analysis |
| Bowen RC   | 2017 | NLR       | Gastric            | DFS                  | NA | 806                     | 1.42 (1.11-1.81) | Does not include complete data for analysis |
| Bowen RC   | 2017 | NLR       | Gastric            | PFS                  | NA | 268                     | 1.48 (1.15-1.89) | Does not include complete data for analysis |
| Bowen RC   | 2017 | NLR       | Gastric            | CSS                  | NA | 389                     | 1.53 (1.11-2.11) | Does not include complete data for analysis |
| Bowen RC   | 2017 | NLR       | Colorectal         | OS                   | NA | 9481                    | 2.04 (1.79-2.23) | Does not include complete data for analysis |
| Bowen RC   | 2017 | NLR       | Colorectal         | DFS                  | NA | 7131                    | 1.75 (1.44-2.12) | Does not include complete data for analysis |
| Bowen RC   | 2017 | NLR       | Colorectal         | PFS                  | NA | 541                     | 2.02 (1.43-2.84) | Does not include complete data for analysis |
| Bowen RC   | 2017 | NLR       | Colorectal         | CSS                  | NA | 2639                    | 2.23 (1.71-2.92) | Does not include complete data for analysis |
| Bowen RC   | 2017 | NLR       | Cholangiocarcinoma | OS                   | NA | 1187                    | 1.53 (1.14-2.05) | Does not include complete data for analysis |
| Bowen RC   | 2017 | NLR       | Cholangiocarcinoma | DFS                  | NA | 102                     | 2.26 (1.24-4.11) | Does not include complete data for analysis |
| Bowen RC   | 2017 | NLR       | Oesophageal        | PFS                  | NA | 138                     | 1.80 (1.05-3.08) | Does not include complete data for analysis |
| Bowen RC   | 2017 | NLR       | Oesophageal        | CSS                  | NA | 1297                    | 1.32 (1.03-1.70) | Does not include complete data for analysis |
| Bowen RC   | 2017 | NLR       | Oesophageal        | DFS                  | NA | 1580                    | 1.67 (1.18-2.38) | Does not include complete data for analysis |
| Bowen RC   | 2017 | NLR       | Oesophageal        | OS                   | NA | 2939                    | 1.61 (1.32-1.95) | Does not include complete data for analysis |
| Bowen RC   | 2017 | NLR       | Gastrointestinal   | OS                   | NA | 36884                   | 1.63 (1.53-1.73) | Does not include complete data for analysis |
| Bowen RC   | 2017 | NLR       | Gastrointestinal   | DFS                  | NA | 14201                   | 1.70 (1.52-1.91) | Does not include complete data for analysis |
| Bowen RC   | 2017 | NLR       | Gastrointestinal   | PFS                  | NA | 1213                    | 1.64 (1.36-1.97) | Does not include complete data for analysis |
| Bowen RC   | 2017 | NLR       | Gastrointestinal   | CSS                  | NA | 4586                    | 1.83 (1.50-2.23) | Does not include complete data for analysis |

|           |      |     |                                 |     |     |                     |                    |                                             |
|-----------|------|-----|---------------------------------|-----|-----|---------------------|--------------------|---------------------------------------------|
| Bowen RC  | 2017 | NLR | Gastrointestinal Stromal Tumour | DFS | NA  | 300                 | 2.16 (1.19-3.94)   | Does not include complete data for analysis |
| Cao J     | 2016 | NLR | Prostate                        | OS  | 16  | 15298               | 1.41 (1.26-1.55)   |                                             |
| Cao J     | 2016 | NLR | Prostate Castration Resistant   | PFS | 6   | 1629                | 1.42 (1.23-1.61)   |                                             |
| Cao J     | 2016 | NLR | Prostate Localised              | RFS | 7   | 11745               | 1.38 (1.01-1.75)   |                                             |
| Chen      | 2017 | NLR | MPM                             | OS  | 11  | 1378                | 1.48 (1.16-1.89)   |                                             |
| Chen G    | 2018 | NLR | Ovarian Cancer                  | OS  | 11  | 3702                | 1.41 (1.11-1.79)   |                                             |
| Chen G    | 2018 | NLR | Ovarian Cancer                  | PFS | 8   | 2991                | 1.52 (1.19-1.95)   |                                             |
| Chen J    | 2015 | NLR | Gastric                         | OS  | 9   | 3723 (1357/2366)    | 2.16 (1.86-2.51)   |                                             |
| Chen J    | 2015 | NLR | Gastric                         | PFS | 2   | 282 (113/169)       | 2.78 (1.95-3.96)   |                                             |
| Chen J    | 2015 | NLR | Breast                          | OS  | 5   | 162172              | 2.28 (1.08-4.80)   |                                             |
| Chen J    | 2015 | NLR | Breast                          | DFS | 4   | 2764                | 1.38 (1.09-1.74)   |                                             |
| Chen J    | 2018 | NLR | Breast (Metastasis)             | OS  | 2   | 858                 | 2.81 (2.13-3.71)   |                                             |
| Chen J    | 2018 | NLR | Breast (No Metastasis)          | OS  | 2   | 488                 | 1.45 (0.37-5.66)   |                                             |
| Chen J    | 2018 | NLR | Breast (Metastasis)             | DFS | 3   | 1003                | 2.16 (1.67-2.80)   |                                             |
| Chen J    | 2018 | NLR | Breast (No Metastasis)          | DFS | 2   | 466                 | 1.34 (0.50-3.58)   |                                             |
| Chen S    | 2017 | NLR | Ovarian Cancer                  | OS  | 11  | 2017*               | 1.51 (1.03-2.23)   |                                             |
| Chen S    | 2017 | NLR | Ovarian Cancer                  | PFS | 7   | 851*                | 1.55 (1.15-2.08)   |                                             |
| Cheng H   | 2015 | NLR | Pancreatic                      | OS  | 9   | 2035 (958/1077)     | 1.59 (1.41-1.79)   |                                             |
| Ding Y    | 2018 | NLR | Melanoma                        | OS  | 10  | 3207                | 2.23 (1.64-3.04)   |                                             |
| Ding Y    | 2018 | NLR | Melanoma                        | PFS | 6   | 752                 | 2.19 (1.78-2.69)   |                                             |
| Dolan R   | 2017 | NLR | Operable Cancer                 | OS  | 120 | 68603 (18667/49936) | 1.73 (1.56-1.91)   |                                             |
| Dolan R   | 2017 | NLR | Operable Cancer                 | CSS | 41  | 21175 (4617/16558)  | 1.32 (1.24-1.41)   |                                             |
| Dolan R   | 2017 | NLR | Operable Colorectal             | OS  | 8   | 4204 (825/3379)     | 1.8 (1.37-2.37)    |                                             |
| Dong YW   | 2016 | NLR | Rectal                          | OS  | 6   | 857                 | 13.41 (4.90-36.72) |                                             |
| Dong YW   | 2016 | NLR | Rectal                          | DFS | 3   | 403                 | 4.37 (2.33-8.19)   |                                             |
| Dong YW   | 2016 | NLR | Rectal                          | RFS | 3   | 433                 | 3.64 (1.88-7.05)   |                                             |
| Ethier JL | 2017 | NLR | Gynecologic                     | OS  | 27  | 10530               | 1.65 (1.44-1.89)   |                                             |
| Ethier JL | 2017 | NLR | Gynecologic                     | EFS | 18  | 5641                | 1.57 (1.35-1.82)   | Does not assess outcomes of interest        |
| Ethier JL | 2017 | NLR | Breast                          | OS  | 13  | 8015                | 2.56 (1.96-3.35)   |                                             |
| Ethier JL | 2017 | NLR | Breast                          | DFS | 9   | 4864                | 1.74 (1.47-2.07)   |                                             |
| Gu X      | 2016 | NLR | Prostate                        | OS  | 11  | 14250               | 1.38 (1.22-1.56)   |                                             |

|          |      |     |                             |         |    |                   |                   |                                                   |
|----------|------|-----|-----------------------------|---------|----|-------------------|-------------------|---------------------------------------------------|
| Gu X     | 2016 | NLR | Prostate                    | RFS/PFS | 9  | 12541             | 1.24 (1.05-1.46)  | Assessed two outcomes within a single analysis    |
| Gu XB    | 2015 | NLR | NSCLC                       | OS      | 13 | 3544              | 1.70 (1.39-2.09)  |                                                   |
| Gu XB    | 2015 | NLR | NSCLC                       | PFS     | 10 | 2623              | 1.63 (1.27-2.09)  |                                                   |
| Hu K     | 2015 | NLR | Renal                       | OS      | 13 | 3034              | 1.82 (1.51-2.19)  |                                                   |
| Hu K     | 2015 | NLR | Renal                       | RFS/PFS | 10 | 2101              | 2.18 (1.75-2.71)  | Assessed two outcomes within a single analysis    |
| Huang QT | 2017 | NLR | Cervical                    | OS      | 7  | 2699              | 1.88 (1.30-2.73)  |                                                   |
| Huang QT | 2017 | NLR | Cervical                    | PFS     | 5  | 2607              | 1.65 (1.18-2.29)  |                                                   |
| Huang QT | 2017 | NLR | Ovarian                     | OS      | 12 | 3935              | 1.69 (1.29-2.22)  |                                                   |
| Huang QT | 2017 | NLR | Ovarian                     | PFS     | 8  | 2152              | 1.63 (1.27-2.09)  |                                                   |
| Huang Y  | 2017 | NLR | Oesophageal                 | OS      | 9  | 2513              | 1.31 (1.16-1.48)  |                                                   |
| Huang Y  | 2017 | NLR | Oesophageal                 | PFS     | 2  | 253               | 1.22 (0.90-1.66)  |                                                   |
| Huang Y  | 2017 | NLR | Oesophageal                 | DFS     | 2  | 535               | 1.27 (1.01-1.59)  |                                                   |
| Jiang T  | 2018 | NLR | Anti-VEGFR                  | OS      | 14 | 2918              | 2.04 (1.61-2.60)  |                                                   |
| Jiang T  | 2018 | NLR | Immune checkpoint blockage  | OS      | 4  | 1291              | 2.16 (1.86-2.51)  |                                                   |
| Jiang T  | 2018 | NLR | Other                       | OS      | 2  | 261               | 1.63 (0.89-2.99)  | Does not assess specific cancer site or treatment |
| Jiang T  | 2018 | NLR | Advanced with immunotherapy | OS      | 23 | 4355              | 1.98 (1.66-2.36)  |                                                   |
| Jiang T  | 2018 | NLR | Advanced with immunotherapy | PFS     | 16 | 2318              | 1.78 (1.48-2.15)  |                                                   |
| Li MX    | 2014 | NLR | Colorectal                  | OS      | 16 | 6291 (2042/4134)* | 1.81 (1.50-1.20)  |                                                   |
| Li MX    | 2014 | NLR | Colorectal                  | PFS     | 10 | 2718 (617/1856)*  | 2.10 (1.55-2.84)  |                                                   |
| Li X     | 2018 | NLR | Neoadjuvant Chemotherapy    | OS      | 18 | 3282              | 1.58 (1.34-1.86)  |                                                   |
| Li X     | 2018 | NLR | Neoadjuvant Chemotherapy    | CSS     | 5  | 971               | 2.22 (1.32-3.74)  |                                                   |
| Li X     | 2018 | NLR | Neoadjuvant Chemotherapy    | DFS     | 11 | 1719              | 1.32 (1.10-1.59)  |                                                   |
| Li X     | 2018 | NLR | Neoadjuvant Chemotherapy    | RFS     | 7  | 775               | 1.90 (1.50-2.40)  |                                                   |
| Li X     | 2017 | NLR | Upper Urinary and Bladder   | OS      | 17 | 4432              | 1.72 (1.45-2.05)  |                                                   |
| Li X     | 2017 | NLR | Upper Urinary and Bladder   | PFS     | 19 | 8182              | 1.68 (1.44-1.96)  |                                                   |
| Li X     | 2017 | NLR | Upper Urinary and Bladder   | CSS     | 17 | 7645              | 1.64 (1.39-1.93)  |                                                   |
| Li Y     | 2016 | NLR | Soft Tissue Sarcoma         | OS      | 3  | 494               | 3.75 (1.24-11.37) |                                                   |

|             |      |     |                                          |         |    |                   |                  |                                                |
|-------------|------|-----|------------------------------------------|---------|----|-------------------|------------------|------------------------------------------------|
| Li Y        | 2016 | NLR | Soft Tissue Sarcoma                      | DFS/PFS | 3  | 514               | 2.43 (0.84-7.05) | Assessed two outcomes within a single analysis |
| Liu G       | 2018 | NLR | Soft Tissue Sarcoma                      | OS      | 13 | 2658*             | 1.59 (1.28-1.97) |                                                |
| Liu G       | 2018 | NLR | Soft Tissue Sarcoma                      | DFS/PFS | NA | NA                | 1.28 (1.12-1.47) | Assessed two outcomes within a single analysis |
| Liu X       | 2017 | NLR | Breast                                   | OS      | 11 | 6836              | 1.87 (1.41-2.48) |                                                |
| Liu X       | 2017 | NLR | Breast                                   | DFS     | 12 | 5523              | 1.72 (1.30-2.27) |                                                |
| Liu X       | 2017 | NLR | Breast                                   | CSS     | 4  | 4186              | 2.09 (1.04-4.21) |                                                |
| Liu X       | 2017 | NLR | Triple-negative breast cancer            | OS      | 4  | 608               | 2.58 (1.63-4.06) |                                                |
| Liu X       | 2017 | NLR | Triple-negative breast cancer            | DFS     | 4  | 461               | 3.51 (1.97-6.24) |                                                |
| Lucca I     | 2015 | NLR | Urothelial Carcinoma                     | OS      | 4  | 5452              | 1.11 (1.01-1.22) |                                                |
| Lucca I     | 2015 | NLR | Urothelial Carcinoma                     | CSS     | 5  | 5641              | 1.21 (1.07-1.37) |                                                |
| Luo XF      | 2018 | NLR | Gastrointestinal stromal                 | OS      | 2  | 278               | 1.74 (0.63-4.84) |                                                |
| Luo XF      | 2018 | NLR | Gastrointestinal stromal                 | RFS/DFS | 7  | NA                | 2.18 (1.30-3.67) | Assessed two outcomes within a single analysis |
| Luo Y       | 2015 | NLR | Upper Urinary                            | CSS     | 4  | 1218              | 2.52 (1.41-4.52) |                                                |
| Luo Y       | 2015 | NLR | Upper Urinary                            | MFS     | 1  | 234               | 2.47 (1.16-5.29) | Does not assess outcomes of interest           |
| Luo Y       | 2015 | NLR | Upper Urinary                            | PFS     | 1  | 460               | 1.70 (1.14-2.56) | Includes only one component study              |
| Luo Y       | 2015 | NLR | Upper Urinary                            | RFS     | 2  | 802               | 1.47 (1.11-1.95) |                                                |
| Luo Y       | 2015 | NLR | Upper Urinary                            | OS      | 1  | 182               | 2.48 (1.31-4.70) | Includes only one component study              |
| Luo Y       | 2015 | NLR | Renal                                    | CSS     | 4  | 1728              | 1.38 (0.96-1.99) |                                                |
| Luo Y       | 2015 | NLR | Renal                                    | MFS     | 2  | 1505              | 1.60 (1.29-1.98) | Does not assess outcomes of interest           |
| Luo Y       | 2015 | NLR | Renal                                    | PFS     | 7  | 753               | 1.85 (1.24-2.77) |                                                |
| Luo Y       | 2015 | NLR | Renal                                    | RFS     | 3  | 700               | 1.97 (1.37-2.84) |                                                |
| Luo Y       | 2015 | NLR | Renal                                    | OS      | 14 | 3373              | 1.79 (1.61-2.00) |                                                |
| Luo Y       | 2015 | NLR | Bladder                                  | CSS     | 5  | 1927              | 1.70 (1.45-1.99) |                                                |
| Luo Y       | 2015 | NLR | Bladder                                  | PFS     | 1  | 107               | 3.52 (1.33-9.33) | Includes only one component study              |
| Luo Y       | 2015 | NLR | Bladder                                  | RFS     | 2  | 531               | 1.55 (1.21-2.00) |                                                |
| Luo Y       | 2015 | NLR | Bladder                                  | OS      | 4  | 1810              | 1.68 (1.45-1.94) |                                                |
| Luo Y       | 2015 | NLR | Prostate                                 | PFS     | 2  | 881               | 1.29 (1.04-1.59) |                                                |
| Luo Y       | 2015 | NLR | Prostate                                 | OS      | 5  | 2310              | 1.44 (1.28-1.62) |                                                |
| Malietzis G | 2014 | NLR | Colorectal                               | OS      | 13 | 3455 (1044/2411)* | 2.08 (1.64-2.64) |                                                |
| Malietzis G | 2014 | NLR | Colorectal with Surgical Bowel Resection | DFS     | 7  | 2408 (797/1611)*  | 2.10 (1.50-2.93) |                                                |

|              |      |     |                                         |     |    |                    |                  |                                                   |
|--------------|------|-----|-----------------------------------------|-----|----|--------------------|------------------|---------------------------------------------------|
| Malietzis G  | 2014 | NLR | Colorectal with Palliative Chemotherapy | DFS | 3  | 515 (148/367)      | 1.53 (1.23-1.90) |                                                   |
| Marchioni M  | 2017 | NLR | Urothelial Carcinoma                    | OS  | 2  | 397                | 1.97 (1.27-3.04) |                                                   |
| Marchioni M  | 2017 | NLR | Urothelial Carcinoma                    | RFS | 4  | 1313               | 1.52 (1.19-1.96) |                                                   |
| Marchioni M  | 2017 | NLR | Urothelial Carcinoma                    | CSS | 6  | 1710               | 1.25 (0.29-5.41) |                                                   |
| Mascarella M | 2018 | NLR | Hypopharynx                             | OS  | 3  | 305                | 2.36 (1.54-3.61) |                                                   |
| Mascarella M | 2018 | NLR | Larynx                                  | OS  | 6  | 1017               | 1.55 (1.26-1.92) |                                                   |
| Mascarella M | 2018 | NLR | Nasopharyngeal                          | OS  | 3  | 1890               | 1.66 (1.35-2.04) |                                                   |
| Mascarella M | 2018 | NLR | Oral cavity                             | OS  | 3  | 1899               | 1.56 (1.53-2.07) |                                                   |
| Mascarella M | 2018 | NLR | Head and Neck                           | OS  | 24 | 6917               | 1.78 (1.53-2.07) |                                                   |
| Mei Z        | 2017 | NLR | Multiple                                | OS  | 65 | 18262*             | 1.70 (1.57-1.84) |                                                   |
| Mei Z        | 2017 | NLR | Multiple                                | PFS | 23 | 5607               | 1.61 (1.42-1.82) |                                                   |
| Mei Z        | 2017 | NLR | Hepatocellular                          | OS  | 2  | 524                | 1.91 (1.55-2.37) |                                                   |
| Mei Z        | 2017 | NLR | Pancreatic                              | OS  | 9  | 1983               | 2.04 (1.50-2.75) |                                                   |
| Mei Z        | 2017 | NLR | Gastric                                 | OS  | 4  | 1715               | 1.69 (1.41-2.03) |                                                   |
| Mei Z        | 2017 | NLR | Colorectal                              | OS  | 15 | 4787               | 1.89 (1.56-2.30) |                                                   |
| Mei Z        | 2017 | NLR | Colorectal                              | PFS | 5  | 549                | 1.91 (1.31-2.79) |                                                   |
| Mei Z        | 2017 | NLR | NSCLC                                   | OS  | 7  | 1386               | 1.20 (1.08-1.34) |                                                   |
| Mei Z        | 2017 | NLR | NSCLC                                   | PFS | 5  | 1140               | 1.38 (1.06-1.80) |                                                   |
| Mei Z        | 2017 | NLR | Renal                                   | OS  | 9  | 1689               | 1.91 (1.58-2.32) |                                                   |
| Mei Z        | 2017 | NLR | Renal                                   | PFS | 5  | 930                | 1.49 (1.18-1.89) |                                                   |
| Mei Z        | 2017 | NLR | Prostate                                | OS  | 5  | 2019               | 1.43 (1.26-1.62) |                                                   |
| Mei Z        | 2017 | NLR | Other                                   | OS  | 12 | NA                 | 1.53 (1.41-1.67) | Does not assess specific cancer site or treatment |
| Mei Z        | 2017 | NLR | Other                                   | PFS | 8  | NA                 | 166 (1.44-1.90)  | Does not assess specific cancer site or treatment |
| Mellor K     | 2018 | NLR | potentially curative gastrectomy        | OS  | 5  | 2787 (1338/1449)   | 2.31 (1.40-3.83) |                                                   |
| Mellor K     | 2018 | NLR | potentially curative gastrectomy        | DFS | 3  | 820 (156/664)      | 2.72 (1.14-6.54) |                                                   |
| Min GT       | 2018 | NLR | HCC                                     | OS  | 45 | 10491 (2594/5312)* | 1.52 (1.39-1.67) |                                                   |
| Min GT       | 2018 | NLR | HCC                                     | DFS | 17 | 3881 (919/1729)*   | 1.71 (1.39-2.11) |                                                   |
| Min GT       | 2018 | NLR | HCC                                     | RFS | 16 | 5037 (1470/3188)*  | 1.84 (1.48-2.30) |                                                   |
| Mowbray N    | 2018 | NLR | Pancreatic (Resection)                  | OS  | 8  | 1519               | 1.77 (1.45-2.15) |                                                   |
| Mu S         | 2018 | NLR | Large B                                 | OS  | 10 | NA                 | 1.83 (1.24-2.70) |                                                   |
| Mu S         | 2018 | NLR | Large B                                 | PFS | 9  | NA                 | 1.59 (1.12-2.25) |                                                   |



|                |      |     |                                                        |         |    |                  |                   |                                                   |
|----------------|------|-----|--------------------------------------------------------|---------|----|------------------|-------------------|---------------------------------------------------|
| Na N           | 2016 | NLR | Renal                                                  | OS      | 8  | 1220             | 1.93 (1.35-2.77)  |                                                   |
| Na N           | 2016 | NLR | Renal                                                  | PFS     | 8  | 1115*            | 2.12 (1.42-3.17)  |                                                   |
| Oh D           | 2018 | NLR | Pancreatic (Chemotherapy)                              | OS      | 13 | NA               | 2.04 (1.58-2.64)  | Does not include complete data for analysis       |
| Oh D           | 2018 | NLR | Pancreatic (Chemradiation)                             | OS      | 2  | NA               | 0.92 (0.27-3.16)  | Does not include complete data for analysis       |
| Oh D           | 2018 | NLR | Pancreatic (Mixed Treatment)                           | OS      | 18 | NA               | 1.67 (1.39-2.01)  | Does not include complete data for analysis       |
| Oh D           | 2018 | NLR | Pancreatic                                             | OS      | 35 | NA               | 1.74 (1.50-2.01)  | Does not include complete data for analysis       |
| Paramanathan A | 2014 | NLR | Colorectal Liver Metastasis Resection of Solid Tumours | OS      | 3  | 814              | 2.28 (1.77-2.93)  |                                                   |
| Paramanathan A | 2014 | NLR | Hepatocellular Resection of Solid Tumours              | OS      | 4  | 566              | 3.52 (2.34-5.28)  |                                                   |
| Paramanathan A | 2014 | NLR | Gastric Resection of Solid Tumours                     | OS      | 7  | 2334             | 1.97 (1.41-2.76)  |                                                   |
| Paramanathan A | 2014 | NLR | Colorectal Solid Tumours                               | OS      | 6  | 1961             | 1.65 (1.21-2.26)  |                                                   |
| Paramanathan A | 2014 | NLR | Oesophageal Solid Tumours                              | OS      | 3  | 559              | 1.48 (0.91-2.42)  |                                                   |
| Paramanathan A | 2014 | NLR | Ovarian Solid Tumours                                  | OS      | 2  | 321              | 2.02 (0.18-22.57) |                                                   |
| Paramanathan A | 2014 | NLR | Multiple                                               | OS      | 36 | 8626             | 1.92 (1.64-2.24)  |                                                   |
| Paramanathan A | 2014 | NLR | Multiple                                               | DFS     | 20 | 13065            | 1.99 (1.80-2.20)  |                                                   |
| Paramanathan A | 2014 | NLR | Other Solid Tumours                                    | OS      | 11 | 2071*            | 1.71 (1.35-2.15)  | Does not assess specific cancer site or treatment |
| Peng B         | 2015 | NLR | NSCLC                                                  | OS      | 11 | 2274             | 1.43 (1.25-1.64)  |                                                   |
| Peng B         | 2015 | NLR | NSCLC                                                  | PFS     | 5  | 1052             | 1.37 (1.07-1.74)  |                                                   |
| Qi X           | 2016 | NLR | Hepatocellular                                         | OS      | 38 | 9127 (3025/5922) | 1.80 (1.59-2.04)  |                                                   |
| Qi X           | 2016 | NLR | Hepatocellular                                         | RFS/DFS | 20 | 4093 (1289/2804) | 2.23 (1.80-2.79)  | Assessed two outcomes within a single analysis    |
| Sacdalan D     | 2018 | NLR | Gentiourinary                                          | PFS     | 1  | NA               | NA                | Includes only one component study                 |
| Sacdalan D     | 2018 | NLR | Gentiourinary                                          | OS      | 1  | NA               | NA                | Includes only one component study                 |
| Sacdalan D     | 2018 | NLR | NSCLC (immune inhibitor)                               | PFS     | 2  | 227              | 1.56 (1.14-2.13)  |                                                   |
| Sacdalan D     | 2018 | NLR | NSCLC (immune inhibitor)                               | OS      | 3  | 342              | 1.63 (0.92-2.88)  |                                                   |
| Sacdalan D     | 2018 | NLR | Melanoma (immune inhibitor)                            | PFS     | 2  | 281              | 1.73 (1.33-2.25)  |                                                   |
| Sacdalan D     | 2018 | NLR | Melanoma (immune inhibitor)                            | OS      | 3  | 339              | 2.18 (1.66-2.84)  |                                                   |
| Sacdalan D     | 2018 | NLR | Composite endpoints (immune inhibitor)                 | PFS     | 5  | 592              | 1.66 (1.38-2.01)  |                                                   |

|                   |      |                          |                                        |         |    |      |                  |                                                |
|-------------------|------|--------------------------|----------------------------------------|---------|----|------|------------------|------------------------------------------------|
| Sacdalan D        | 2018 | NLR                      | Composite endpoints (immune inhibitor) | OS      | 7  | 765  | 1.92 (1.29-2.87) |                                                |
| Sacdalan D        | 2018 | NLR                      | Ipilimumab                             | PFS     | 1  | NA   | NA               | Includes only one component study              |
| Sacdalan D        | 2018 | NLR                      | Ipilimumab                             | OS      | 2  | 255  | 2.05 (1.54-2.74) |                                                |
| Sacdalan D        | 2018 | NLR                      | Nivolumab                              | PFS     | 1  | NA   | NA               | Includes only one component study              |
| Sacdalan D        | 2018 | NLR                      | Nivolumab                              | OS      | 2  | 290  | 1.43 (0.77-2.69) |                                                |
| Sacdalan D        | 2018 | NLR                      | ICI                                    | PFS     | 3  | 220  | 1.76 (1.25-2.47) |                                                |
| Sacdalan D        | 2018 | NLR                      | ICI                                    | OS      | 3  | 220  | 2.52 (1.58-4.02) |                                                |
| Semeniuk-Wojtas A | 2018 | NLR                      | Renal (TKI)                            | OS      | 7  | NA   | 2.14 (1.67-2.73) |                                                |
| Semeniuk-Wojtas A | 2018 | NLR                      | Renal (TKI)                            | PFS     | 6  | NA   | 2.01 (1.27-3.18) |                                                |
| Shen M            | 2014 | Intratumoral Neutrophils | Multiple                               | OS      | 16 | 3335 | 1.66 (1.37-2.01) |                                                |
| Shen M            | 2014 | Peritumoral Neutrophils  | Multiple                               | OS      | 2  | 535  | 1.66 (0.64-4.32) |                                                |
| Shen M            | 2014 | Stromal Neutrophils      | Multiple                               | OS      | 2  | 535  | 1.10 (0.76-1.61) |                                                |
| Shen M            | 2014 | Intratumoral Neutrophils | Multiple                               | CSS     | 3  | 437  | 3.36 (2.08-5.42) |                                                |
| Shen M            | 2014 | Intratumoral Neutrophils | Multiple                               | RFS/DFS | 10 | 2139 | 1.68 (1.36-2.07) | Assessed two outcomes within a single analysis |
| Shen M            | 2014 | Peritumoral Neutrophils  | Multiple                               | RFS/DFS | 3  | 636  | 1.80 (0.96-3.37) | Assessed two outcomes within a single analysis |
| Shen M            | 2014 | Stromal Neutrophils      | Multiple                               | RFS/DFS | 3  | 636  | 1.27 (0.75-2.16) | Assessed two outcomes within a single analysis |
| Shen M            | 2014 | Intratumoral Neutrophils | HCC and ICC                            | OS      | 4  | 846  | 1.80 (1.3-2.43)  |                                                |
| Shen M            | 2014 | Intratumoral Neutrophils | HCC and ICC                            | RFS/DFS | 4  | 846  | 1.58 (1.33-1.88) | Assessed two outcomes within a single analysis |
| Shen M            | 2014 | Intratumoral Neutrophils | Gastric                                | OS      | 2  | 388  | 1.20 (0.50-2.89) |                                                |
| Shen M            | 2014 | Intratumoral Neutrophils | NSCLC                                  | OS      | 2  | 967  | 1.16 (1.00-1.35) |                                                |
| Shen M            | 2014 | Intratumoral Neutrophils | Renal                                  | OS      | 2  | 206  | 2.69 (1.89-3.83) |                                                |
| Shen M            | 2014 | Intratumoral Neutrophils | NHC                                    | OS      | 3  | 220  | 1.69 (1.10-2.60) |                                                |
| Shen M            | 2014 | Intratumoral Neutrophils | Multiple                               | RFS/DFS | 10 | 2139 | 1.68 (1.36-2.07) | Assessed two outcomes within a single analysis |
| Shen M            | 2014 | Peritumoral Neutrophils  | Multiple                               | RFS/DFS | 3  | 636  | 1.80 (0.96-3.37) | Assessed two outcomes within a single analysis |

|            |      |                          |                                                |         |    |                  |                  |                                                |
|------------|------|--------------------------|------------------------------------------------|---------|----|------------------|------------------|------------------------------------------------|
| Shen M     | 2014 | Stromal Neutrophils      | Multiple                                       | RFS/DFS | 3  | 636              | 1.27 (0.75-2.16) | Assessed two outcomes within a single analysis |
| Shen M     | 2014 | Intratumoral Neutrophils | HCC and ICC                                    | RFS/DFS | 4  | 846              | 1.58 (1.33-1.88) | Assessed two outcomes within a single analysis |
| Su L       | 2017 | NLR                      | Nasopharyngeal                                 | OS      | 4  | 2101             | 1.77 (1.41-2.23) |                                                |
| Su L       | 2017 | NLR                      | Nasopharyngeal                                 | PFS     | 4  | 1934             | 1.67 (1.36-2.06) |                                                |
| Su L       | 2017 | NLR                      | Nasopharyngeal                                 | CSS     | 3  | 2320             | 1.42 (1.21-1.67) |                                                |
| Su L       | 2017 | NLR                      | Nasopharyngeal                                 | LRFS    | 2  | 425              | 1.64 (1.15-2.34) | Does not assess outcomes of interest           |
| Sun J      | 2016 | NLR                      | Gastric                                        | OS      | 19 | 5431 (2186/3245) | 1.98 (1.75-2.24) |                                                |
| Sun J      | 2016 | NLR                      | Gastric                                        | DFS     | 7  | 976 (472/504)    | 1.58 (1.32-1.88) |                                                |
| Sun XD     | 2016 | NLR                      | Hepatocellular with liver transplantation      | OS      | 7  | 1243 (264/979)   | 2.71 (1.91-3.83) |                                                |
| Sun XD     | 2016 | NLR                      | Hepatocellular with liver transplantation      | DFS     | 10 | 1637 (372/1265)  | 3.61 (2.23-5.84) |                                                |
| Szor D     | 2018 | NLR                      | Gastric (Resected)                             | OS      | 7  | 3223 (1018/2205) | 2.89 (2.41-3.47) |                                                |
| Takenaka Y | 2017 | NLR                      | Nasopharyngeal                                 | OS      | 6  | 2890             | 1.51 (1.27-1.78) |                                                |
| Takenaka Y | 2017 | NLR                      | Nasopharyngeal                                 | DSS     | 3  | NA               | 1.44 (1.22-1.71) | Does not assess outcomes of interest           |
| Takenaka Y | 2017 | NLR                      | Nasopharyngeal                                 | PFS     | 3  | 1872             | 1.53 (1.22-1.90) |                                                |
| Takenaka Y | 2017 | NLR                      | Nasopharyngeal                                 | DMFS    | NA | NA               | NA               | Does not assess outcomes of interest           |
| Takenaka Y | 2018 | NLR                      | Head and Neck                                  | OS      | 17 | 3371             | 1.69 (1.47-1.93) |                                                |
| Takenaka Y | 2018 | NLR                      | Head and Neck                                  | DSS     | 5  | 972              | 1.88 (1.20-2.95) | Does not assess outcomes of interest           |
| Tan DW     | 2016 | NLR                      | Cholangiocarcinoma                             | OS      | 12 | 2093             | 1.45 (1.30-1.62) |                                                |
| Tan Q      | 2018 | NLR                      | Immune checkpoint inhibitors                   | OS      | 18 | 1863             | 2.26 (1.68-3.03) |                                                |
| Tan Q      | 2018 | NLR                      | Immune checkpoint inhibitors                   | PFS     | 11 | 1274             | 1.81 (1.36-2.41) |                                                |
| Tang H     | 2016 | NLR                      | Colorectal Liver Metastasis                    | OS      | 7  | 1491             | 2.17 (1.82-2.58) |                                                |
| Tang H     | 2016 | NLR                      | Colorectal Liver Metastasis                    | RFS     | 6  | 1093             | 1.96 (1.64-2.35) |                                                |
| Tang H     | 2016 | NLR                      | Colorectal Liver Metastasis Surgical Resection | OS      | 5  | 1309             | 2.08 (1.73-2.49) |                                                |
| Tang H     | 2016 | NLR                      | Colorectal Liver Metastasis Surgical Resection | RFS     | 4  | 903              | 1.89 (1.34-2.66) |                                                |
| Tang H     | 2016 | NLR                      | Colorectal Liver Metastasis Non-surgical       | OS      | 2  | 182              | 3.11 (1.83-5.49) |                                                |
| Tang H     | 2016 | NLR                      | Colorectal Liver Metastasis Non-surgical       | RFS     | 2  | 190              | 2.33 (1.27-3.95) |                                                |

|              |      |     |                           |     |    |                   |                  |                                             |
|--------------|------|-----|---------------------------|-----|----|-------------------|------------------|---------------------------------------------|
| Tang H       | 2017 | NLR | Biliary Tract             | OS  | 14 | 3217 (1295/1710)* | 1.51 (1.36-1.67) |                                             |
| Tang H       | 2017 | NLR | Biliary Tract             | RFS | 5  | 637 (303/244)     | 1.46 (1.18-1.81) |                                             |
| Tang L       | 2016 | NLR | Prostate                  | OS  | 13 | NA                | 1.63 (1.41-1.88) | Does not include complete data for analysis |
| Tang L       | 2016 | NLR | Prostate                  | RFS | 10 | NA                | 1.36 (1.13-1.64) | Does not include complete data for analysis |
| Tang L       | 2016 | NLR | Prostate Localised        | OS  | 2  | NA                | 1.44 (0.75-2.75) | Does not include complete data for analysis |
| Tang L       | 2016 | NLR | Prostate Localised        | PFS | 7  | NA                | 1.33 (1.05-1.69) | Does not include complete data for analysis |
| Tang L       | 2016 | NLR | Prostate Locally Advanced | OS  | 10 | NA                | 1.51 (1.40-1.63) | Does not include complete data for analysis |
| Tang L       | 2016 | NLR | Prostate Locally Advanced | PFS | 3  | NA                | 1.39 (1.17-1.67) | Does not include complete data for analysis |
| Tang X       | 2017 | NLR | Bladder                   | OS  | 11 | 3093              | 1.19 (1.07-1.31) |                                             |
| Tang X       | 2017 | NLR | Bladder                   | CSS | 8  | 2766              | 1.40 (1.17-1.69) |                                             |
| Tang X       | 2017 | NLR | Bladder                   | RFS | 8  | 4850              | 1.58 (1.24-2.03) |                                             |
| Tang X       | 2017 | NLR | Bladder                   | PFS | 6  | 3327              | 1.33 (1.19-1.49) |                                             |
| Te           | 2014 | NLR | Pancreatic                | OS  | 4  | 466               | 2.27 (1.01-5.14) |                                             |
| Templeton AJ | 2014 | NLR | Multiple                  | OS  | 79 | 33432             | 1.81 (1.67-1.97) | Does not include complete data for analysis |
| Templeton AJ | 2014 | NLR | Multiple                  | CSS | 10 | 14407             | 1.61 (1.36-1.91) | Does not include complete data for analysis |
| Templeton AJ | 2014 | NLR | Multiple                  | PFS | 16 | 7822              | 1.63 (1.39-1.91) | Does not include complete data for analysis |
| Templeton AJ | 2014 | NLR | Multiple                  | DFS | 28 | 7203              | 2.27 (1.85-1.79) | Does not include complete data for analysis |
| Templeton AJ | 2014 | NLR | Hepatocellular            | OS  | 11 | 8849              | 1.43 (1.23-1.66) | Does not include complete data for analysis |
| Templeton AJ | 2014 | NLR | Hepatocellular            | DFS | NA |                   | 4.49 (1.87-10.8) | Does not include complete data for analysis |
| Templeton AJ | 2014 | NLR | Colorectal                | OS  | 22 | 8849              | 1.91 (1.53-2.39) | Does not include complete data for analysis |
| Templeton AJ | 2014 | NLR | Colorectal                | CSS | NA |                   | 1.37 (0.89-2.12) | Does not include complete data for analysis |
| Templeton AJ | 2014 | NLR | Colorectal                | PFS | NA |                   | 1.32 (1.16-1.91) | Does not include complete data for analysis |
| Templeton AJ | 2014 | NLR | Colorectal                | DFS | NA |                   | 2.00 (1.53-2.62) | Does not include complete data for analysis |
| Templeton AJ | 2014 | NLR | Gastroesophageal          | OS  | 14 | 4548              | 1.66 (1.46-1.88) | Does not include complete data for analysis |
| Templeton AJ | 2014 | NLR | Gastroesophageal          | CSS | NA |                   | 1.27 (0.83-1.96) | Does not include complete data for analysis |
| Templeton AJ | 2014 | NLR | Gastroesophageal          | DFS | NA |                   | 2.01 (1.51-2.69) | Does not include complete data for analysis |
| Templeton AJ | 2014 | NLR | Cholangiocarcinoma        | OS  | 3  | 973               | 1.43 (1.25-1.63) | Does not include complete data for analysis |
| Templeton AJ | 2014 | NLR | NSCLC                     | OS  | 7  | 1591              | 1.66 (1.40-1.96) | Does not include complete data for analysis |
| Templeton AJ | 2014 | NLR | NSCLC                     | PFS | NA |                   | 1.63 (1.33-1.99) | Does not include complete data for analysis |
| Templeton AJ | 2014 | NLR | Renal                     | OS  | 8  | 1704              | 2.22 (1.72-2.88) | Does not include complete data for analysis |
| Templeton AJ | 2014 | NLR | Renal                     | PFS | NA |                   | 1.64 (0.99-2.74) | Does not include complete data for analysis |
| Templeton AJ | 2014 | NLR | Renal                     | DFS | NA |                   | 2.61 (1.62-4.18) | Does not include complete data for analysis |

|               |      |     |                                                |         |    |                   |                  |                                                |
|---------------|------|-----|------------------------------------------------|---------|----|-------------------|------------------|------------------------------------------------|
| Templeton AJ  | 2014 | NLR | Mesothelioma                                   | OS      | 7  | 693               | 2.35 (1.89-2.92) | Does not include complete data for analysis    |
| Templeton AJ  | 2014 | NLR | Other                                          | OS      | 36 | 10715             | 1.57 (1.39-1.82) | Does not include complete data for analysis    |
| Templeton AJ  | 2014 | NLR | Other                                          | OS      | 28 | 7675              | 1.79 (1.63-1.97) | Does not include complete data for analysis    |
| Templeton AJ  | 2014 | NLR | Other                                          | OS      | 36 | 22169             | 1.80 (1.63-1.99) | Does not include complete data for analysis    |
| Templeton AJ  | 2014 | NLR | Other                                          | CSS     | NA |                   | 1.78 (1.47-2.15) | Does not include complete data for analysis    |
| Templeton AJ  | 2014 | NLR | Other                                          | PFS     | NA |                   | 2.08 (1.61-2.70) | Does not include complete data for analysis    |
| Templeton AJ  | 2014 | NLR | Other                                          | DFS     | NA |                   | 1.46 (1.15-1.87) | Does not include complete data for analysis    |
| Tham T        | 2018 | NLR | Head and Neck                                  | OS      | 11 | 1972 (1137/835)   | 1.51 (1.32-1.73) |                                                |
| Tham T        | 2018 | NLR | Head and Neck                                  | DSS     | 5  | 3184              | 1.50 (1.23-1.83) | Does not assess outcomes of interest           |
| Tsai PL       | 2016 | NLR | Colorectal                                     | OS      | 4  | 1844              | 2.03 (1.56-2.63) |                                                |
| Tsai PL       | 2016 | NLR | Colorectal                                     | DFS     | 2  | 1480              | 1.67 (1.19-2.35) |                                                |
| Vartolomei M  | 2018 | NLR | Urothelial Carcinoma                           | OS      | 3  | 822               | 1.64 (1.23-2.17) |                                                |
| Vartolomei M  | 2018 | NLR | Urothelial Carcinoma                           | RFS     | 6  | 3563              | 1.60 (1.16-2.20) |                                                |
| Vartolomei M  | 2018 | NLR | Urothelial Carcinoma                           | CSS     | 7  | 4132              | 1.73 (1.23-2.44) |                                                |
| Vartolomei MD | 2018 | NLR | Non muscle-Invasive Bladder Cancer             | RFS     | 6  | 2298              | 1.78 (1.32-2.40) |                                                |
| Vartolomei MD | 2018 | NLR | Non muscle-Invasive Bladder Cancer             | PFS     | 6  | 2298              | 2.14 (1.59-2.87) |                                                |
| Vartolomei MD | 2018 | NLR | Non muscle-Invasive Bladder Cancer (High Risk) | RFS     | 4  | 599               | 2.31 (1.27-4.22) |                                                |
| Vartolomei MD | 2018 | NLR | Non muscle-Invasive Bladder Cancer (High Risk) | PFS     | 3  | 510               | 2.54 (1.37-4.71) |                                                |
| Wang Y        | 2018 | NLR | Hepatocellular Resection                       | OS      | 13 | 4225 (1336/2723)* | 1.52 (1.37-1.69) |                                                |
| Wang Y        | 2018 | NLR | Hepatocellular Resection                       | RFS     | 10 | 3404 (940/2298)*  | 1.64 (1.44-1.87) |                                                |
| Wang Y        | 2018 | NLR | Hepatocellular Resection                       | DFS     | 7  | 1272 (581/691)    | 1.50 (1.35-1.67) |                                                |
| Wang Y        | 2018 | NLR | Oral Squamous Cell Carcinoma                   | OS      | 6  | 1360              | 1.56 (1.28-1.90) |                                                |
| Wang Y        | 2018 | NLR | Oral Squamous Cell Carcinoma                   | DFS     | 6  | 1161              | 1.93 (1.47-2.54) |                                                |
| Wei B         | 2016 | NLR | Breast (some with Metastasis)                  | OS      | 10 | 6812              | 2.03 (1.41-2.93) |                                                |
| Wei B         | 2016 | NLR | Breast (some with Metastasis)                  | DFS     | 8  | 5314              | 1.46 (1.12-1.90) |                                                |
| Wei Y         | 2014 | NLR | Urinary                                        | OS      | 13 | 3391              | 1.81 (1.48-2.21) |                                                |
| Wei Y         | 2014 | NLR | Urinary                                        | RFS/CSS | 9  | 2060              | 2.07 (1.65-2.60) | Assessed two outcomes within a single analysis |

|          |      |     |                                |         |    |                 |                  |                                                |
|----------|------|-----|--------------------------------|---------|----|-----------------|------------------|------------------------------------------------|
| Wei Y    | 2014 | NLR | Urothelial Carcinoma           | RFS/CSS | 3  | 456             | 2.58 (1.66-4.01) | Assessed two outcomes within a single analysis |
| Wei Y    | 2014 | NLR | Renal                          | OS      | 9  | 1764            | 1.90 (1.47-2.45) |                                                |
| Wei Y    | 2014 | NLR | Renal                          | RFS/CSS | 4  | 1347            | 1.83 (1.35-2.48) | Assessed two outcomes within a single analysis |
| Wei Y    | 2014 | NLR | Bladder                        | RFS/CSS | 2  | 257             | 2.20 (1.27-3.80) | Assessed two outcomes within a single analysis |
| Wei Y    | 2014 | NLR | Prostate                       | OS      | 2  | 377             | 1.33 (0.99-1.80) |                                                |
| Wei Y    | 2014 | NLR | Urinary                        | RFS/CSS | 9  | 2060            | 2.07 (1.65-2.60) | Assessed two outcomes within a single analysis |
| Wu S     | 2018 | NLR | Bladder                        | OS      | 9  | 4151            | 1.27 (1.12-1.43) |                                                |
| Wu S     | 2018 | NLR | Bladder                        | RFS     | 9  | 8075            | 1.41 (1.23-1.60) |                                                |
| Wu S     | 2018 | NLR | Bladder                        | PFS     | 7  | 6771            | 1.75 (1.36-2.15) |                                                |
| Wu S     | 2018 | NLR | Bladder (Metastasis)           | OS      | 4  | 862             | 1.63 (1.34-1.91) |                                                |
| Wu S     | 2018 | NLR | Bladder                        | CSS/DSS | NA | NA              | 1.27 (1.19-1.35) | Does not include complete data for analysis    |
| Wu J     | 2017 | NLR | Cervical                       | OS      | 12 | 3661            | 1.38 (1.20-1.58) |                                                |
| Wu J     | 2017 | NLR | Cervical                       | PFS     | 10 | 2452            | 1.65 (1.31-2.07) |                                                |
| Xiao WK  | 2014 | NLR | Hepatocellular Transplant      | OS      | 5  | 788 (123/665)   | 3.42 (2.41-4.85) |                                                |
| Xiao WK  | 2014 | NLR | Hepatocellular Mixed treatment | OS      | 3  | 522 (213/309)   | 1.85 (1.40-2.44) |                                                |
| Xiao WK  | 2014 |     | Hepatocellular TACE            | OS      | 3  | 360 (102/258)   | 2.52 (1.64-3.86) |                                                |
| Xiao WK  | 2014 | NLR | Hepatocellular Resection       | OS      | 2  | 1054 (264/790)  | 3.33 (2.23-4.98) |                                                |
| Xiao WK  | 2014 | NLR | Hepatocellular RFA             | OS      | 2  | 370 (172/198)   | 1.28 (1.10-1.48) |                                                |
| Xiao WK  | 2014 | NLR | Hepatocellular Transplant      | DFS     | 5  | 788 (123/665)   | 5.9 (3.99-8.70)  |                                                |
| Xiao WK  | 2014 | NLR | Hepatocellular RFA             | DFS     | 2  | 1054 (264/790)  | 2.10 (2.06-2.14) |                                                |
| Xiao WK  | 2014 | NLR | Hepatocellular Resection       | DFS     | 2  | 370 (172/198)   | 1.07 (0.82-1.40) |                                                |
| Xin-Ji Z | 2015 | NLR | Gastric                        | OS      | 17 | 5623            | 1.65 (1.46-1.83) |                                                |
| Xin-Ji Z | 2015 | NLR | Gastric                        | DFS     | 4  | 1736            | 1.61 (1.28-1.94) |                                                |
| Xu W     | 2018 | NLR | Hepatocellular (TACE)          | OS      | 6  | NA              | 1.53 (1.29-1.78) |                                                |
| Xu W     | 2018 | NLR | Hepatocellular (TACE)          | PFS     | NA | NA              | NA               | Does not include complete data for analysis    |
| Xu ZG    | 2018 | NLR | Hepatocellular (Transplant)    | OS      | 8  | 1230 (352/878)  | 2.22 (1.34-3.68) |                                                |
| Xu ZG    | 2018 | NLR | Hepatocellular (Transplant)    | RFS     | 4  | 83 (251/372)*   | 3.77 (2.01-7.06) |                                                |
| Xu ZG    | 2018 | NLR | Hepatocellular (Transplant)    | DFS     | 8  | 1104 (176/715)* | 2.51 (1.22-5.15) |                                                |

|           |      |     |                               |      |    |                   |                  |                                      |
|-----------|------|-----|-------------------------------|------|----|-------------------|------------------|--------------------------------------|
| Xue TC    | 2014 | NLR | Hepatocellular                | OS   | 21 | 3874 (1295/2504)* | 2.10 (1.74-2.54) |                                      |
| Xue TC    | 2014 | NLR | Hepatocellular                | DFS  | 17 | 3184 (1025/2159)  | 2.47 (1.86-3.30) |                                      |
| Yang HB   | 2016 | NLR | Lung (both)                   | OS   | 18 | 6206*             | 1.23 (1.17-1.29) |                                      |
| Yang HB   | 2016 | NLR | Lung (both)                   | PFS  | 7  | 1186*             | 1.18 (1.08-1.29) |                                      |
| Yang JJ   | 2015 | NLR | Pancreatic                    | OS   | 8  | 959 (268/691)     | 2.61 (1.68-4.06) |                                      |
| Yang JJ   | 2015 | NLR | Pancreatic                    | CSS  | 3  | 845 (387/458)     | 1.66 (1.08-2.57) |                                      |
| Yang X    | 2015 | NLR | Oesophageal                   | OS   | 6  | 1633              | 1.54 (1.32-1.80) |                                      |
| Yang X    | 2015 | NLR | Oesophageal                   | DFS  | 2  | 385               | 1.74 (1.25-2.43) |                                      |
| Yang Z    | 2017 | NLR | Ovarian                       | OS   | 10 | 2320              | 1.72 (1.18-2.51) |                                      |
| Yang Z    | 2017 | NLR | Ovarian                       | PFS  | 7  | 1863              | 1.80 (1.22-2.65) |                                      |
| Yin X     | 2016 | NLR | Prostate Localised            | OS   | 2  | 8765              | 1.45 (0.77-2.71) |                                      |
| Yin X     | 2016 | NLR | Prostate Castration Resistant | OS   | 9  | 2765              | 1.57 (1.41-1.74) |                                      |
| Yin X     | 2016 | NLR | Prostate Localised            | RFS  | 4  | 9553              | 1.34 (0.89-2.02) |                                      |
| Yin X     | 2016 | NLR | Prostate Castration Resistant | PFS  | 4  | 1010              | 1.97 (1.28-3.04) |                                      |
| Yin Y     | 2015 | NLR | Lung (both)                   | OS   | 17 | 2990*             | 1.51 (1.32-1.72) |                                      |
| Yodying H | 2016 | NLR | Oesophageal                   | OS   | 7  | 1540              | 1.40 (1.08-1.81) |                                      |
| Yodying H | 2016 | NLR | Oesophageal                   | DFS  | 3  | 476               | 1.54 (0.79-2.98) |                                      |
| Yu B      | 2017 | NLR | Nasopharyngeal                | OS   | 3  | 691               | 1.71 (1.37-2.13) |                                      |
| Yu B      | 2017 | NLR | Nasopharyngeal                | PFS  | 2  | 462               | 1.57 (1.19-2.09) |                                      |
| Yu B      | 2017 | NLR | Nasopharyngeal                | DSS  | 2  | 2258              | 1.41 (1.19-1.66) | Does not assess outcomes of interest |
| Yu B      | 2017 | NLR | Nasopharyngeal                | DMFS | 2  | 883               | 1.91 (1.35-2.71) | Does not assess outcomes of interest |
| Yin J     | 2017 | NLR | Nasopharyngeal                | OS   | 5  | 2464              | 1.74 (1.45-2.10) |                                      |
| Yin J     | 2017 | NLR | Nasopharyngeal                | PFS  | 5  | 4130              | 1.48 (1.30-1.69) |                                      |
| Yu Y      | 2017 | NLR | Lung (both)                   | OS   | 17 | 6070              | 1.46 (1.30-1.64) |                                      |
| Yu Y      | 2017 | NLR | Lung (both)                   | PFS  | 8  | 1581              | 1.42 (1.15-1.75) |                                      |
| Yu Y      | 2017 | NLR | Lung (both) with Surgery      | OS   | 7  | 2877              | 1.50 (1.21-1.84) |                                      |
| Yu Y      | 2018 | NLR | Head and Neck                 | OS   | 14 | 4122              | 1.84 (1.53-2.23) |                                      |
| Yu Y      | 2018 | NLR | Head and Neck                 | PFS  | 5  | 1997              | 2.17 (1.20-3.92) |                                      |
| Yu Y      | 2018 | NLR | Head and Neck                 | DFS  | 4  | 780               | 1.99 (1.46-2.71) |                                      |
| Yu Y      | 2018 | NLR | Head and Neck                 | RFS  | 4  | 658               | 1.63 (1.09-2.45) |                                      |
| Yu Y      | 2018 | NLR | Head and Neck                 | MFS  | NA | NA                | NA               | Does not assess outcomes of interest |
| Zhan H    | 2018 | NLR | Melanoma                      | OS   | 10 | 4437              | 1.56 (1.28-1.90) |                                      |

|          |      |     |                                              |         |    |                  |                   |                                                |
|----------|------|-----|----------------------------------------------|---------|----|------------------|-------------------|------------------------------------------------|
| Zhan H   | 2018 | NLR | Melanoma                                     | DFS/PFS | 6  | NA               | 1.86 (1.24-2.80)  | Assessed two outcomes within a single analysis |
| Zhang J  | 2017 | NLR | Colorectal                                   | OS      | 13 | 4628             | 1.92 (1.57-2.34)  |                                                |
| Zhang J  | 2017 | NLR | Colorectal                                   | DFS     | 5  | 2178             | 1.66 (1.31-2.11)  |                                                |
| Zhang J  | 2017 | NLR | Glioma                                       | OS      | 6  | 1021             | 1.48 (1.25-1.76)  |                                                |
| Zhang X  | 2014 | NLR | Gastric                                      | OS      | 10 | 2952 (1768/1184) | 1.83 (1.62-2.07)  |                                                |
| Zhang X  | 2014 | NLR | Gastric                                      | PFS     | 2  | 314 (158/156)    | 1.54 (1.22-1.95)  |                                                |
| Zhang X  | 2014 | NLR | Gastric                                      | DFS     | 3  | 719 (194/525)    | 1.58 (1.12-2.21)  |                                                |
| Zhao QT  | 2015 | NLR | Lung (both)                                  | OS      | 21 | 6942             | 1.51 (1.33-1.71)  |                                                |
| Zhao QT  | 2015 | NLR | Lung (both)                                  | PFS     | 9  | 1748             | 1.33 (1.07-1.67)  |                                                |
| Zhao Z   | 2018 | NLR | Ovarian Cancer                               | OS      | 12 | 3261             | 1.70 (1.35-2.15)  |                                                |
| Zhao Z   | 2018 | NLR | Ovarian Cancer                               | PFS     | 11 | 2713             | 1.77 (1.48-2.12)  |                                                |
| Zheng    | 2017 | NLR | Hepatocellular                               | OS      | 21 | 4777             | 1.54 (1.34-1.76)  |                                                |
| Zheng    | 2017 | NLR | Hepatocellular                               | RFS     | 12 | 2792             | 1.45 (1.16-1.82)  |                                                |
| Zheng DC | 2016 | NLR | Colorectal                                   | OS      | 21 | 7927             | 1.92 (1.59-2.32)  |                                                |
| Zheng DC | 2016 | NLR | Colorectal                                   | PFS     | 14 | 3662             | 1.92 (1.51-2.44)  |                                                |
| Zhou Q   | 2017 | NLR | Ovarian Cancer                               | OS      | 16 | 4910             | 1.50 (1.27-1.77)  |                                                |
| Zhou Q   | 2017 | NLR | Ovarian Cancer                               | PFS     | 12 | 3884             | 1.53 (1.28-1.84)  |                                                |
| Zhou Y   | 2018 | NLR | Gastroenteropancreatic Neuroendocrine Tumors | OS      | 4  | 422              | 3.05 (1.97-4.76)  |                                                |
| Zhou Y   | 2018 | NLR | Gastroenteropancreatic Neuroendocrine Tumors | RFS     | 3  | 300              | 3.30 (2.04-5.32)  |                                                |
| Zhou Y   | 2018 | NLR | Pancreatic Neuroendocrine Tumour             | OS      | 2  | 223              | 4.21 (1.95-9.13)  |                                                |
| Zhou Y   | 2018 | NLR | Pancreatic Neuroendocrine Tumour             | RFS     | 2  | 223              | 5.37 (2.14-13.47) |                                                |
| Zhou Y   | 2018 | NLR | Pancreatic                                   | OS      | 43 | NA               | 1.81 (1.59-2.05)  |                                                |
| Zhou Y   | 2018 | NLR | Pancreatic                                   | DFS     | 8  | 8147 (2862/4100) | 1.66 (1.17-2.35)  |                                                |
| Zhu Y    | 2018 | NLR | Ovarian                                      | OS      | 8  | 1915             | 2.21 (1.95-2.52)  |                                                |
| Zhu Y    | 2018 | NLR | Ovarian                                      | PFS     | 5  | 1069             | 2.22 (1.92-2.57)  |                                                |
| Li H     | 2019 | NLR | Colorectal Surgical Resection                | OS      | 11 | 4832             | 1.66 (1.36-2.02)  |                                                |
| Li H     | 2019 | NLR | Colorectal Surgical Resection                | DFS     | 9  | 4237             | 1.54 (1.18-2.02)  |                                                |
| Li H     | 2019 | NLR | Colorectal Surgical Resection                | RFS     | 3  | 643              | 2.31 (1.68-3.17)  |                                                |



|        |      |     |                                                                    |                      |    |       |                  |                                                |
|--------|------|-----|--------------------------------------------------------------------|----------------------|----|-------|------------------|------------------------------------------------|
| Li H   | 2019 | NLR | Colorectal Surgical Resection                                      | DSS                  | 3  | x     | 2.27 (1.75–2.96) | Does not assess outcomes of interest           |
| Liu X  | 2020 | NLR | Adenocarcinoma of the esophagogastric junction (AEG)               | OS/CC/DSS            | 5  | x     | 1.55 (1.10-2.18) | Assessed two outcomes within a single analysis |
| Duan J | 2018 | NLR | Breast Surgical Resection                                          | OS                   | 12 | 6233  | 2.45 (1.69–3.54) |                                                |
| Duan J | 2018 | NLR | Breast Surgical Resection                                          | DFS                  | 15 | 7820  | 1.54 (1.28–1.87) |                                                |
| Duan J | 2018 | NLR | Breast Surgical Resection                                          | RFS                  | 2  | 319   | 4.05 (1.94–8.47) |                                                |
| Guo W  | 2019 | NLR | Breast (triple negative and Her2 positive)                         | OS                   | 28 | 14128 | 1.78 (1.49-2.13) |                                                |
| Guo W  | 2019 | NLR | Breast (triple negative and Her2 positive)                         | DFS                  | 27 | 11369 | 1.6 (1.42-1.96)  |                                                |
| Ni L   | 2020 | NLR | Endometrial carcinoma                                              | OS                   | 9  | 2942  | 2.22 (1.77-2.78) |                                                |
| Ni L   | 2020 | NLR | Endometrial carcinoma                                              | PFS                  | 5  | 1798  | 1.81 (1.35-2.41) |                                                |
| Yin X  | 2019 | NLR | Ovarian                                                            | OS                   | 10 | 2400  | 1.34 (1.16–1.54) |                                                |
| Yin X  | 2019 | NLR | Ovarian                                                            | PFS                  | 10 | 2400  | 1.36 (1.17–1.57) |                                                |
| Liu L  | 2019 | NLR | Hepatocellular carcinoma treated with Sorfenib                     | OS                   | 11 | 2324  | 1.76 (1.44-2.15) |                                                |
| Li S   | 2020 | NLR | Hepatocellular (TACE)                                              | OS                   | 16 | 4023  | 1.81 (1.66-1.97) |                                                |
| Choi N | 2019 | NLR | Radiotherapy for Solid Tumours, Head and Neck, Rectal, Lung cancer | OS (all)             | 38 | x     | 1.9 (1.66-2.17)  | Does not include complete data for analysis    |
| Choi N | 2019 | NLR | Radiotherapy for Solid Tumours, Head and Neck, Rectal, Lung cancer | OS (radiation alone) | 9  | x     | 1.71 (1.44-2.04) | Does not include complete data for analysis    |
| Choi N | 2019 | NLR | Radiotherapy for Solid Tumours, Head and Neck, Rectal, Lung cancer | OS (Head and Neck)   | 16 | x     | 1.91 (1.49-2.20) | Does not include complete data for analysis    |
| Choi N | 2019 | NLR | Radiotherapy for Solid Tumours, Head and Neck, Rectal, Lung cancer | OS (Rectal)          | 6  | x     | 2.45 (1.47-4.08) | Does not include complete data for analysis    |
| Choi N | 2019 | NLR | Radiotherapy for Solid Tumours, Head and Neck, Rectal, Lung cancer | OS (Lung)            | 6  | x     | 1.46 (1.24-1.72) | Does not include complete data for analysis    |

|        |      |     |                                                                    |                                           |    |      |                   |                                             |
|--------|------|-----|--------------------------------------------------------------------|-------------------------------------------|----|------|-------------------|---------------------------------------------|
| Choi N | 2019 | NLR | Radiotherapy for Solid Tumours, Head and Neck, Rectal, Lung cancer | DFS                                       | 11 | x    | 1.54 (1.23-1.94)  | Does not include complete data for analysis |
| Choi N | 2019 | NLR | Radiotherapy for Solid Tumours, Head and Neck, Rectal, Lung cancer | PFS                                       | 15 | x    | 2.12 (1.64-2.75)  | Does not include complete data for analysis |
| Li LQ  | 2020 | NLR | soft tissue sarcoma                                                | OS                                        | 12 | 1865 | 2.08 (1.60-2.69)  |                                             |
| Li LQ  | 2020 | NLR | soft tissue sarcoma                                                | DFS                                       | 7  | 1239 | 1.46 (1.21-1.77)  |                                             |
| Li LQ  | 2020 | NLR | soft tissue sarcoma (synovial sarcoma)                             | OS                                        | 3  | x    | 2.39 (1.89-3.02)  |                                             |
| Li LQ  | 2020 | NLR | soft tissue sarcoma (liposarcoma)                                  | OS                                        | 2  | x    | 2.94 (1.81-4.77)  |                                             |
| Li LQ  | 2020 | NLR | soft tissue sarcoma                                                | OS (clear cell sarcoma)                   | 1  | x    | 3.06 (1.26-7.4)   | Includes only one component study           |
| Li LQ  | 2020 | NLR | soft tissue sarcoma                                                | OS (leiomyosarcoma)                       | 1  | x    | x                 | Includes only one component study           |
| Li LQ  | 2020 | NLR | soft tissue sarcoma                                                | OS (angiosarcoma)                         | 1  | x    | 2.15 (1.29-3.59)  | Includes only one component study           |
| Li LQ  | 2020 | NLR | soft tissue sarcoma                                                | OS (undifferentiated pleomorphic sarcoma) | 1  | x    | 2.17 (1.29-3.59)  | Includes only one component study           |
| Li LQ  | 2020 | NLR | soft tissue sarcoma                                                | OS (rhabdomyosarcoma)                     | 1  | 22   | 4.76 (1.02-22.24) | Includes only one component study           |
| Li LQ  | 2020 | NLR | soft tissue sarcoma                                                | DSS                                       | 7  | 1452 | 1.72 (1.43-2.08)  | Does not assess outcomes of interest        |
| Lei Y  | 2019 | NLR | Glioma                                                             | OS                                        | 16 | 2275 | 1.43 (1.27-1.62)  |                                             |
| Zeng Q | 2018 | NLR | Multiple Myeloma                                                   | PFS                                       | 4  | 1334 | 1.74 (1.11-2.73)  |                                             |
| Zeng Q | 2018 | NLR | Multiple Myeloma                                                   | OS                                        | 8  | 1886 | 1.73 (1.23-2.44)  |                                             |
| Wang D | 2020 | NLR | Glioma                                                             | OS                                        | 15 | 2798 | 1.38 (1.09-1.74)  |                                             |
| Xie X  | 2019 | NLR | Immune checkpoint inhibitors                                       | PFS                                       | 11 | 1114 | 1.74 (1.34-2.27)  |                                             |
| Xie X  | 2019 | NLR | NSCLC with Immune checkpoint inhibitors                            | PFS                                       | 6  | 609  | 1.39 (1.09-1.78)  |                                             |
| Xie X  | 2019 | NLR | Melanoma with Immune checkpoint inhibitors                         | PFS                                       | 4  | 467  | 2.07 (1.78-2.41)  |                                             |
| Xie X  | 2019 | NLR | Immune checkpoint inhibitors (nivolumab)                           | PFS                                       | 8  | 744  | 1.99 (1.72-2.30)  |                                             |
| Xie X  | 2019 | NLR | Immune checkpoint inhibitors (ipilimumab)                          | PFS                                       | 3  | 370  | 2.12 (1.65-2.71)  |                                             |

|         |      |     |                                                     |         |    |       |                    |                                                |
|---------|------|-----|-----------------------------------------------------|---------|----|-------|--------------------|------------------------------------------------|
| Xie X   | 2019 | NLR | Immune checkpoint inhibitors (nivolumab+ipilimumab) | OS      | 1  | x     | x                  | Includes only one component study              |
| Xie X   | 2019 | NLR | Immune checkpoint inhibitors (nivolumab)            | OS      | 6  | 442   | 2.58 (1.92-3.48)   |                                                |
| Xie X   | 2019 | NLR | Immune checkpoint inhibitors (ipilimumab)           | OS      | 7  | 798   | 2.55 (1.47-4.42)   |                                                |
| Xie X   | 2019 | NLR | NSCLC with Immune checkpoint inhibitors             | OS      | 4  | 307   | 2.62 (1.40-4.65)   |                                                |
| Xie X   | 2019 | NLR | Melanoma with Immune checkpoint inhibitors          | OS      | 9  | 1104  | 2.51 (1.56-4.02)   |                                                |
| Xie X   | 2019 | NLR | Immune checkpoint inhibitors                        | OS      | 14 | 1449  | 2.61 (1.77-3.86)   |                                                |
| Xue L   | 2019 | NLR | Neoadjuvant chemotherapy                            | OS      | 3  | 701   | 2.781 (0.54-14.32) |                                                |
| Xue L   | 2019 | NLR | Neoadjuvant chemotherapy                            | DFS     | 5  | 1242  | 1.18 (0.78-1.78)   |                                                |
| Zhan H  | 2018 | NLR | Melanoma                                            | DFS/PFS | 6  | x     | 1.86 (1.24-2.80)   | Assessed two outcomes within a single analysis |
| Guo J   | 2018 | NLR | Prostate                                            | OS      | 13 | 4917  | 1.58 (1.41-1.78)   |                                                |
| Guo J   | 2018 | NLR | Prostate metastatic                                 | OS      | 8  | 2152  | 1.66 (1.35-2.03)   |                                                |
| Guo J   | 2018 | NLR | Prostate mixed treatment                            | OS      | 3  | x     | 2.16 (1.33-3.50)   | Does not include complete data for analysis    |
| Guo J   | 2018 | NLR | Prostate                                            | PFS     | 7  | 1088  | 1.95 (1.53-2.49)   |                                                |
| Hu G    | 2019 | NLR | Bladder with Radical Cystectomy                     | OS      | 8  | 10363 | 1.14 (1.05-1.24)   |                                                |
| Hu G    | 2019 | NLR | Bladder with Radical Cystectomy and NAC             | OS      | 4  | 447   | 1.06 (0.99-1.15)   |                                                |
| Hu G    | 2019 | NLR | Bladder                                             | OS      | 18 | 11945 | 1.23 (1.13-1.33)   |                                                |
| Mori K  | 2020 | NLR | UTUC treated with nephroureterectomy                | CSS     | 12 | 6350  | 1.66 (1.34-2.06)   |                                                |
| Mori K  | 2020 | NLR | UCB treated with radical cystectomy                 | CSS     | 12 | 11158 | 1.2 (1.11-1.29)    |                                                |
| Nunno V | 2019 | NLR | Renal                                               | OS      | 21 | x     | 1.8 (1.61-2.00)    | Does not include complete data for analysis    |
| Nunno V | 2019 | NLR | Renal non-metastatic                                | OS      | 5  | x     | 1.57 (1.27-1.94)   | Does not include complete data for analysis    |
| Nunno V | 2019 | NLR | Renal metastatic                                    | OS      | 13 | x     | 2.05 (1.74-2.41)   | Does not include complete data for analysis    |
| Nunno V | 2019 | NLR | Renal                                               | PFS     | 15 | x     | 1.69 (1.42-2.01)   | Does not include complete data for analysis    |
| Nunno V | 2019 | NLR | Renal non-metastatic                                | DFS     | 8  | x     | 1.52 (1.23-1.87)   | Does not include complete data for analysis    |
| Nunno V | 2019 | NLR | Renal metastatic                                    | PFS     | 7  | x     | 1.95 (1.43-2.64)   | Does not include complete data for analysis    |
| Su S    | 2019 | NLR | Renal                                               | OS      | 3  | 1174  | 1.05 (0.71-1.53)   |                                                |

|        |      |     |                                                     |     |    |      |                  |                                             |
|--------|------|-----|-----------------------------------------------------|-----|----|------|------------------|---------------------------------------------|
| Su S   | 2019 | NLR | Renal                                               | DFS | 1  | x    | 2.02 (1.03-3.94) | Includes only one component study           |
| Su S   | 2019 | NLR | Renal                                               | CSS | 1  | x    | 2.67 (1.06-6.71) | Includes only one component study           |
| Su S   | 2019 | NLR | Urothelial Carcinoma                                | OS  | 7  | 2554 | 1.29 (1.03-1.61) |                                             |
| Su S   | 2019 | NLR | Urothelial Carcinoma                                | DFS | 2  | 400  | 1.44 (0.89-2.34) |                                             |
| Su S   | 2019 | NLR | Urothelial Carcinoma                                | CSS | 5  | 1067 | 1.51 (0.89-2.34) |                                             |
| Su S   | 2019 | NLR | Prostate                                            | OS  | 2  | 2230 | 1.35 (1.20-1.51) |                                             |
| Shen J | 2019 | NLR | Renal metastatic                                    | OS  | 12 | x    | 2.17 (1.68–2.79) | Does not include complete data for analysis |
| Shen J | 2019 | NLR | Renal metastatic                                    | PFS | x  | x    | 1.78 (0.91–3.49) | Does not include complete data for analysis |
| Suh J  | 2019 | NLR | Urothelial transurethral resection of bladder tumor | RFS | 5  | 1129 | 2.32 (1.77-3.05) |                                             |
| Suh J  | 2019 | NLR | Urothelial transurethral resection of bladder tumor | PFS | 4  | 1040 | 2.45 (1.49-4.02) |                                             |
| Suh J  | 2019 | NLR | Urothelial Carcinoma with radical cystectomy        | OS  | 10 | 7049 | 1.18 (1.08-1.30) |                                             |
| Suh J  | 2019 | NLR | Urothelial Carcinoma with radical cystectomy        | PFS | 5  | 5935 | 1.12 (1.03-1.22) |                                             |
| Suh J  | 2019 | NLR | Urothelial Carcinoma with radical cystectomy        | CSS | 9  | 6974 | 1.35 (1.18-1.55) |                                             |
| Suh J  | 2019 | NLR | Urothelial Carcinoma with Chemo                     | OS  | 5  | 1664 | 1.44 (1.28-1.62) |                                             |
| Suh J  | 2019 | NLR | Urothelial Carcinoma with Chemo                     | PFS | 2  | 500  | 1.3 (1.02-1.64)  |                                             |
| Suh J  | 2019 | NLR | Urothelial Carcinoma with nephroureterectomy        | PFS | 8  | 4411 | 1.63 (1.22-2.18) |                                             |
| Suh J  | 2019 | NLR | Urothelial Carcinoma with nephroureterectomy        | CSS | 8  | 4893 | 1.68 (1.23-2.31) |                                             |
| Suh J  | 2019 | NLR | Urothelial Carcinoma with nephroureterectomy        | OS  | 3  | 1103 | 1.72 (1.31-2.25) |                                             |
| Guan Y | 2020 | NLR | Prostate (castration resistant) with abiraterone    | OS  | 10 | 1626 | 1.63 (1.43-1.85) |                                             |
| Guan Y | 2020 | NLR | Prostate (castration resistant) with enzalutamide   | OS  | 5  | 1518 | 1.48 (1.27-1.72) |                                             |
| Guan Y | 2020 | NLR | Prostate (castration resistant) with abiraterone    | PFS | 2  | 198  | 1.62 (0.91-3.26) |                                             |

|             |      |     |                                                   |        |    |      |                     |                                             |
|-------------|------|-----|---------------------------------------------------|--------|----|------|---------------------|---------------------------------------------|
| Guan Y      | 2020 | NLR | Prostate (castration resistant) with enzalutamide | PFS    | 2  | 427  | 1.55 (0.96-2.45)    |                                             |
| Yang S      | 2019 | NLR | Nasopharyngeal                                    | OS     | 10 | 7031 | 1.46 (1.30-1.63)    |                                             |
| Yang S      | 2019 | NLR | Nasopharyngeal                                    | PFS    | 4  | 2012 | 1.67 (1.36-2.07)    |                                             |
| Ishibashi Y | 2020 | NLR | Oesophageal with SR                               | OS     | 9  | 4128 | 1.47 (1.32-1.63)    |                                             |
| Lu Y        | 2020 | NLR | NSCLC                                             | OS     | 21 | 5141 | 1.4 (1.26-1.55)     |                                             |
| Lu Y        | 2020 | NLR | NSCLC                                             | PFS    | 3  | 701  | 1.55 (1.27-1.88)    |                                             |
| Sun Y       | 2018 | NLR | Oesophageal squamous cell carcinom                | OC/CSS | x  | x    | x                   | Does not assess outcomes of interest        |
| Sun Y       | 2018 | NLR | Oesophageal squamous cell carcinom                | EFS    | x  | x    | x                   | Does not assess outcomes of interest        |
| Yang Y      | 2018 | NLR | Oral cavity                                       | OS     | 9  | 2373 | 1.61 (1.39-1.86)    |                                             |
| Yang Y      | 2018 | NLR | Oral cavity                                       | DFS    | 10 | 1920 | 1.73 (1.44-2.07)    |                                             |
| Yang L      | 2019 | NLR | head and neck squamous cell carcinoma             | OS     | 23 | 6834 | 1.68 (1.39-2.03)    |                                             |
| Yang L      | 2019 | NLR | squamous cell carcinoma of oral cavity            | OS     | 5  | 3234 | 1.59 (1.36-1.85)    |                                             |
| Yang L      | 2019 | NLR | oropharynx                                        | OS     | 3  | x    | 2.7 (1.74-4.18)     | Does not include complete data for analysis |
| Yang L      | 2019 | NLR | hypopharynx                                       | OS     | 3  | 310  | 2.88 (2.06-4.03)    |                                             |
| Yang L      | 2019 | NLR | larynx                                            | OS     | 4  | 826  | 1.65 (1.24-2.19)    |                                             |
| Yang L      | 2019 | NLR | head and neck squamous cell carcinoma             | DFS    | 9  | 2406 | 1.76 (1.42-2.17)    |                                             |
| Yang L      | 2019 | NLR | oropharynx                                        | DFS    | 3  | x    | 1.69 (1.24-2.30)    |                                             |
| Yang L      | 2019 | NLR | larynx                                            | DFS    | 3  | 1260 | 1.36 (1.13-1.63)    |                                             |
| Yang L      | 2019 | NLR | head and neck squamous cell carcinoma             | PFS    | 4  | 461  | 1.53 (1.09-2.14)    |                                             |
| Yang L      | 2019 | NLR | head and neck squamous cell carcinoma             | CSS    | 5  | 1854 | 1.45 (1.23-1.71)    |                                             |
| Zhang X     | 2018 | NLR | Oesophageal                                       | OS     | 26 | 8985 | 1.39 (1.23-1.54)    |                                             |
| Zhang X     | 2018 | NLR | Oesophageal Squamous cell carcinoma               | OS     | 18 | 7403 | 1.343 (1.145-1.541) |                                             |
| Zhang X     | 2018 | NLR | Oesophageal adenocarcinoma                        | OS     | 1  | 327  | x                   | Includes only one component study           |
| Zhang X     | 2018 | NLR | Oesophageal mixed treatment                       | OS     | 7  | x    | 1.391 (1.120-1.662) | Does not include complete data for analysis |
| Zhang X     | 2018 | NLR | Oesophageal Surgery                               | OS     | 22 | 7119 | 1.349 (1.188-1.509) |                                             |
| Zhang X     | 2018 | NLR | Oesophageal no Surgery                            | OS     | 4  | 1046 | 1.666 (1.151-2.181) |                                             |

|             |      |     |                                                |     |    |      |                  |                                             |
|-------------|------|-----|------------------------------------------------|-----|----|------|------------------|---------------------------------------------|
| Zhang X     | 2018 | NLR | Oesophageal                                    | DFS | 10 | 2837 | 1.41 (1.12-1.69) |                                             |
| Zhang X     | 2018 | NLR | Oesophageal                                    | PFS | 4  | 908  | 1.4 (1.15-1.65)  |                                             |
| Zhang X     | 2018 | NLR | Oesophageal                                    | RFS | 3  | 677  | 1.51 (1.11-1.91) |                                             |
| Zhang X     | 2018 | NLR | Oesophageal                                    | CSS | 7  | 1885 | 1.38 (1.07-1.69) |                                             |
| Wang Z      | 2019 | NLR | NSCLC with systematic therapy                  | OS  | 24 | 3694 | 1.63 (1.43-1.84) |                                             |
| Wang Z      | 2019 | NLR | NSCLC chemo                                    | OS  | 9  | 1276 | 1.73 (1.26-2.36) |                                             |
| Wang Z      | 2019 | NLR | NSCLC immuno                                   | OS  | 8  | 1396 | 2.5 (1.60-3.89)  |                                             |
| Wang Z      | 2019 | NLR | NSCLC targeted                                 | OS  | 5  | 422  | 1.92 (1.14-3.24) |                                             |
| Wang Z      | 2019 | NLR | NSCLC targeted                                 | PFS | 5  | 619  | 1.53 (1.04-2.25) |                                             |
| Wang Z      | 2019 | NLR | NSCLC immuno                                   | PFS | 4  | 585  | 1.53 (1.27-1.84) |                                             |
| Wang Z      | 2019 | NLR | NSCLC chemo                                    | PFS | 5  | 875  | 1.74 (1.39-2.17) |                                             |
| Wang Z      | 2019 | NLR | NSCLC with systematic therapy                  | PFS | 16 | 2679 | 1.45 (1.28-1.66) |                                             |
| Tham T      | 2018 | NLR | Head and neck                                  | DFS | 11 | 1692 | 1.66 (1.30-2.11) |                                             |
| Tham T      | 2018 | NLR | Head and neck                                  | PFS | 6  | 2173 | 1.43 (1.09-1.87) |                                             |
| Tham T      | 2018 | NLR | Head and neck Surgery                          | OS  | 3  | 707  | 1.76 (1.16-2.68) |                                             |
| Tham T      | 2018 | NLR | Head and neck no Surgery                       | OS  | 9  | 3285 | 1.48 (1.21-1.80) |                                             |
| Tham T      | 2018 | NLR | Oral cavity, oropharyngeal, and hypopharyngeal | OS  | 7  | x    | 1.83 (1.43-2.35) | Does not include complete data for analysis |
| Tham T      | 2018 | NLR | Nasopharyngeal                                 | OS  | 5  | 2565 | 1.28 (1.01-1.62) |                                             |
| Tham T      | 2018 | NLR | Head and neck other                            | OS  | x  | x    | x                | Does not include complete data for analysis |
| Tham T      | 2018 | NLR | Larynx                                         | OS  | 4  | 821  | 1.6 (1.27-2.03)  |                                             |
| Tham T      | 2018 | NLR | Head and neck                                  | OS  | 26 | 6769 | 1.85 (1.58-2.17) |                                             |
| Pirozzolo G | 2019 | NLR | Oesophageal                                    | OS  | 20 | 6457 | 1.68 (1.46-1.93) |                                             |
| Pirozzolo G | 2019 | NLR | Oesophageal Surgery+/- chemo                   | OS  | 14 | 3580 | 1.69 (1.39-2.06) |                                             |
| Pirozzolo G | 2019 | NLR | Oesophageal Neo+surgery                        | OS  | 3  | 1314 | 1.52 (1.00-2.31) |                                             |
| Pirozzolo G | 2019 | NLR | Oesophageal DCRT                               | OS  | 3  | 1563 | 1.74 (1.55-1.95) |                                             |
| Pirozzolo G | 2019 | NLR | Oesophageal SCC                                | OS  | 15 | x    | 1.61 (1.36-1.90) | Does not include complete data for analysis |
| Pirozzolo G | 2019 | NLR | Oesophageal                                    | DFS | 8  | 2077 | 1.75 (1.35-2.26) |                                             |
| Pirozzolo G | 2019 | NLR | Oesophageal                                    | PFS | 2  | 1046 | 1.66 (1.43-1.93) |                                             |
| Jiang T     | 2019 | NLR | NSCLC treated with PD-1 inhibitor              | OS  | 13 | 2018 | 2.07 (1.70-2.44) |                                             |

|             |      |     |                                       |     |    |      |                  |                                             |
|-------------|------|-----|---------------------------------------|-----|----|------|------------------|---------------------------------------------|
| Jiang T     | 2019 | NLR | NSCLC treated with PD-1 inhibitor     | PFS | 12 | 1614 | 1.59 (1.36-1.82) |                                             |
| Kamarajah S | 2020 | NLR | Oesophageal with oesophagectomy       | OS  | 12 | x    | 1.47 (1.30-1.66) | Does not include complete data for analysis |
| Feng J      | 2020 | NLR | Thyroid                               | DFS | 7  | 6343 | 1.79 (0.97-3.33) |                                             |
| Cho J       | 2018 | NLR | head and neck squamous cell carcinoma | OS  | 24 | 5650 | 1.96 (1.66-2.31) |                                             |
| Cho J       | 2018 | NLR | head and neck squamous cell carcinoma | DFS | 12 | 2079 | 1.9 (1.41-2.54)  |                                             |
| Cao D       | 2018 | NLR | NSCLC treated with Nivoumab           | OS  | 8  | 666  | 1.75 (1.33-2.30) |                                             |
| Cao D       | 2018 | NLR | NSCLC treated with Nivoumab           | PFS | 10 | 900  | 1.44 (1.18-1.77) |                                             |

N=number of component studies with in review, (NA) Not Applicable, (HR), Hazard ratio, (NLR) Neutrophil to Lymphocyte Ratio, (HNL) High Neutrophil to Lymphocyte Ratio, (LNL) Low Neutrophil to Lymphocyte Ratio, (IN) Intratumoural Neutrophils, (PN) Peritumoural Neutrophils, (SN) Stromal Neutrophils, (OS) Overall Survival, (DFS) Disease-Free Survival, (PFS) Progression-Free Survival, (RFS) Reoccurrence-Free Survival, (EFS) Event Free Survival, (CSS) Cancer Specific Survival, (DSS) Disease Specific Survival, (MFS) Metastasis-Free Survival, (DMFS) Distant Metastasis Free Survival, (VEGFR) Vascular Endothelial Growth Factor Receptor, (ICI) Immune Checkpoint Inhibitor, (PC) Palliative Chemotherapy, (SBR) Surgical Bowel Resection, (SR) Surgical Resection, (CLM) Colorectal Liver Metastasis, (NS) Non-surgical, (HCC) Hepatocellular Carcinoma, (ICC) Intrahepatic Cholangiocarcinoma, (RFA) Radiofrequency Ablation, (TACE) Trans-Arterial Chemoembolization, (MPM) Malignant Pleural Mesothelioma, (NSCLC) Non-Small Cell Lung Cancer, (NHC), Neck and Head Cancer, (CR) Castration Resistant, (TKI) Tyrosine Kinase Inhibitor.

\*Composite endpoints are defined as a grouping of cancer diagnosis unrelated to site, stage or treatment unless otherwise specified.

†review reported incomplete data on sample size.

### Appendix C: Assessment of duplicate meta-analyses

| Author       | Year | Biomarker | Cancer site                   | meta-analysis metric | N  | Sample size     | Pooled HR        | Assessing magnitude                                                               | Notes        | Count included pairs | Count removed |
|--------------|------|-----------|-------------------------------|----------------------|----|-----------------|------------------|-----------------------------------------------------------------------------------|--------------|----------------------|---------------|
| Luo Y        | 2015 | NLR       | Bladder                       | CSS                  | 5  | 1927            | 1.70 (1.45-1.99) | 1.482352941                                                                       | AGREE        | 1                    | 3             |
| Luo Y        | 2015 | NLR       | Upper Urinary                 | CSS                  | 4  | 1218            | 2.52 (1.41-4.52) | 1                                                                                 |              |                      |               |
| Li X         | 2017 | NLR       | Upper Urinary and Bladder     | CSS                  | 17 | 7645            | 1.64 (1.39-1.93) | 1.536585366                                                                       |              |                      |               |
| Tang X       | 2017 | NLR       | Bladder                       | CSS                  | 8  | 2766            | 1.40 (1.17-1.69) | 1.8                                                                               |              |                      |               |
| Lucca I      | 2015 | NLR       | Urothelial Carcinoma          | CSS                  | 5  | 5641            | 1.21 (1.07-1.37) | 1.429752066                                                                       | DO NOT AGREE | 0                    | 4             |
| Marchioni M  | 2017 | NLR       | Urothelial Carcinoma          | CSS                  | 6  | 1710            | 1.25 (0.29-5.41) | 1.384                                                                             |              |                      |               |
| Vartolomei M | 2018 | NLR       | Urothelial Carcinoma          | CSS                  | 7  | 4132            | 1.73 (1.23-2.44) | 1                                                                                 |              |                      |               |
| Su S         | 2019 | NLR       | Urothelial Carcinoma          | CSS                  | 5  | 1067            | 1.51 (0.89-2.34) | 1.145695364                                                                       |              |                      |               |
| Chen J       | 2015 | NLR       | Breast                        | DFS                  | 4  | 2764            | 1.38 (1.09-1.74) | 1.260869565                                                                       | AGREE        | 1                    | 3             |
| Ethier JL    | 2017 | NLR       | Breast                        | DFS                  | 9  | 4864            | 1.74 (1.47-2.07) | 1                                                                                 |              |                      |               |
| Wei B        | 2016 | NLR       | Breast (some with Metastasis) | DFS                  | 8  | 5314            | 1.46 (1.12-1.90) | 1.191780822                                                                       |              |                      |               |
| Liu X        | 2017 | NLR       | Breast                        | DFS                  | 12 | 5523            | 1.72 (1.30-2.27) | 1.011627907                                                                       |              |                      |               |
| Tsai PL      | 2016 | NLR       | Colorectal                    | DFS                  | 2  | 1480            | 1.67 (1.19-2.35) | 1.006024096                                                                       | AGREE        | 1                    | 1             |
| Zhang J      | 2017 | NLR       | Colorectal                    | DFS                  | 5  | 2178            | 1.66 (1.31-2.11) | 1                                                                                 |              |                      |               |
| Sun J        | 2016 | NLR       | Gastric                       | DFS                  | 7  | 976             | 1.58 (1.32-1.88) | 1.018987342                                                                       | AGREE        | 1                    | 2             |
| Xin-Ji Z     | 2015 | NLR       | Gastric                       | DFS                  | 4  | 1736            | 1.61 (1.28-1.94) | 1                                                                                 |              |                      |               |
| Zhang X      | 2014 | NLR       | Gastric                       | DFS                  | 3  | 719             | 1.58 (1.12-2.21) | 1.018987342                                                                       |              |                      |               |
| Sun XD       | 2016 | NLR       | HCC Transplant                | DFS                  | 10 | 1637            | 3.61 (2.23-5.84) | 1.63888889                                                                        | DO NOT AGREE | 0                    | 3             |
| Xiao WK      | 2014 | NLR       | Hepatocellular Transplant     | DFS                  | 5  | 788 (123/665)   | 5.9 (3.99-8.70)  |                                                                                   |              |                      |               |
| Xu ZG        | 2018 | NLR       | Hepatocellular Transplant     | DFS                  | 8  | 1104 (176/715)* | 2.51 (1.22-5.15) | 2.35059761                                                                        |              |                      |               |
| Huang Y      | 2017 | NLR       | Oesophageal                   | DFS                  | 2  | 535             | 1.27 (1.01-1.59) | 1.377952756                                                                       | AGREE        | 1                    | 4             |
| Yang X       | 2015 | NLR       | Oesophageal                   | DFS                  | 2  | 385             | 1.74 (1.25-2.43) | 1.005747126                                                                       |              |                      |               |
| Yodying H    | 2016 | NLR       | Oesophageal                   | DFS                  | 3  | 476             | 1.54 (0.79-2.98) | <i>Dissagreement in significance disregarded due to small sample size (&lt;5)</i> |              |                      |               |



|                |      |     |                               |     |    |                    |                  |             |       |   |   |
|----------------|------|-----|-------------------------------|-----|----|--------------------|------------------|-------------|-------|---|---|
| Zhang X        | 2018 | NLR | Oesophageal                   | DFS | 10 | 2837               | 1.41 (1.12-1.69) | 1.241134752 |       |   |   |
| Pirozzolo G    | 2019 | NLR | Oesophageal                   | DFS | 8  | 2077               | 1.75 (1.35-2.26) | 1           |       |   |   |
| Chen J         | 2015 | NLR | Breast                        | OS  | 5  | 162172             | 2.28 (1.08-4.80) | 1.122807018 |       |   |   |
| Ethier JL      | 2017 | NLR | Breast                        | OS  | 13 | 8015               | 2.56 (1.96-3.35) | 1           |       |   |   |
| Wei B          | 2016 | NLR | Breast (some with Metastasis) | OS  | 10 | 6812               | 2.03 (1.41-2.93) | 1.261083744 | AGREE | 1 | 3 |
| Liu X          | 2017 | NLR | Breast                        | OS  | 11 | 6836               | 1.87 (1.41-2.48) | 1.368983957 |       |   |   |
| Huang QT       | 2017 | NLR | Cervical                      | OS  | 7  | 2699               | 1.88 (1.30-2.73) | 1.362318841 |       |   |   |
| Wu J           | 2017 | NLR | Cervical                      | OS  | 12 | 3661               | 1.38 (1.20-1.58) |             | AGREE | 1 | 1 |
| Li MX          | 2014 | NLR | Colorectal                    | OS  | 16 | 629*               | 1.81 (1.50-1.20) | 1.149171271 |       |   |   |
| Malietzis G    | 2014 | NLR | Colorectal                    | OS  | 13 | 3455*              | 2.08 (1.64-2.64) | 1           |       |   |   |
| Mei Z          | 2017 | NLR | Colorectal                    | OS  | 15 | 4787               | 1.89 (1.56-2.30) | 1.100529101 |       |   |   |
| Tsai PL        | 2016 | NLR | Colorectal                    | OS  | 4  | 1844               | 2.03 (1.56-2.63) | 1.024630542 |       |   |   |
| Zhang J        | 2017 | NLR | Colorectal                    | OS  | 13 | 4628               | 1.92 (1.57-2.34) | 1.083333333 |       |   |   |
| Zheng DC       | 2016 | NLR | Colorectal                    | OS  | 21 | 7927               | 1.92 (1.59-2.32) | 1.083333333 | AGREE | 1 | 7 |
| Paramanathan A | 2014 | NLR | Colorectal Solid Tumours      | OS  | 6  | 1961               | 1.65 (1.21-2.26) | 1.260606061 |       |   |   |
| Dolan R        | 2017 | NLR | Operable Colorectal           | OS  | 8  | 4204 (825/3379)    | 1.8 (1.37-2.37)  | 1.155555556 |       |   |   |
| Chen J         | 2015 | NLR | Gastric                       | OS  | 9  | 3723               | 2.16 (1.86-2.51) | 1           |       |   |   |
| Mei Z          | 2017 | NLR | Gastric                       | OS  | 4  | 1715               | 1.69 (1.41-2.03) | 1.278106509 |       |   |   |
| Sun J          | 2016 | NLR | Gastric                       | OS  | 19 | 5431               | 1.98 (1.75-2.24) | 1.090909091 | AGREE | 1 | 4 |
| Xin-Ji Z       | 2015 | NLR | Gastric                       | OS  | 17 | 5623               | 1.65 (1.46-1.83) | 1.309090909 |       |   |   |
| Zhang X        | 2014 | NLR | Gastric                       | OS  | 10 | 2952               | 1.83 (1.62-2.07) | 1.180327869 |       |   |   |
| Mei Z          | 2017 | NLR | HCC                           | OS  | 2  | 524                | 1.91 (1.55-2.37) | 1.09947644  |       |   |   |
| Qi X           | 2016 | NLR | HCC                           | OS  | 38 | 9127               | 1.80 (1.59-2.04) | 1.166666667 |       |   |   |
| Xue TC         | 2014 | NLR | HCC                           | OS  | 21 | 3874*              | 2.10 (1.74-2.54) | 1           | AGREE | 1 | 4 |
| Min GT         | 2018 | NLR | HCC                           | OS  | 45 | 10491 (2594/5312)* | 1.52 (1.39-1.67) | 1.381578947 |       |   |   |
| Zheng          | 2017 | NLR | HCC                           | OS  | 21 | 4777               | 1.54 (1.34-1.76) | 1.363636364 |       |   |   |
| Yang HB        | 2016 | NLR | Lung (both)                   | OS  | 18 | 6206*              | 1.23 (1.17-1.29) | 1.227642276 |       |   |   |
| Yin Y          | 2015 | NLR | Lung (both)                   | OS  | 17 | 2990*              | 1.51 (1.32-1.72) | 1           |       |   |   |
| Zhao QT        | 2015 | NLR | Lung (both)                   | OS  | 21 | 6942               | 1.51 (1.33-1.71) | 1           | AGREE | 1 | 3 |
| Yu Y           | 2017 | NLR | Lung (both)                   | OS  | 17 | 6070               | 1.46 (1.30-1.64) | 1.034246575 |       |   |   |
| Su L           | 2017 | NLR | Nasopharyngeal                | OS  | 4  | 2101               | 1.77 (1.41-2.23) | 1           |       |   |   |
| Yu B           | 2017 | NLR | Nasopharyngeal                | OS  | 3  | 691                | 1.71 (1.37-2.13) | 1.035087719 |       |   |   |
| Mascarella M   | 2018 | NLR | Nasopharyngeal                | OS  | 3  | 1890               | 1.66 (1.35-2.04) | 1.06626506  |       |   |   |
| Takenaka Y     | 2017 | NLR | Nasopharyngeal                | OS  | 6  | 2890               | 1.51 (1.27-1.78) | 1.17218543  | AGREE | 1 | 6 |
| Yin J          | 2017 | NLR | Nasopharyngeal                | OS  | 5  | 2464               | 1.74 (1.45-2.10) | 1.017241379 |       |   |   |
| Yang S         | 2019 | NLR | Nasopharyngeal                | OS  | 10 | 7031               | 1.46 (1.30-1.63) | 1.212328767 |       |   |   |

|                |      |     |                           |    |    |       |                   |                                                                                   |       |   |   |
|----------------|------|-----|---------------------------|----|----|-------|-------------------|-----------------------------------------------------------------------------------|-------|---|---|
| Tham T         | 2018 | NLR | Nasopharyngeal            | OS | 5  | 2565  | 1.28 (1.01-1.62)  | 1.3828125                                                                         |       |   |   |
| Gu XB          | 2015 | NLR | NSCLC                     | OS | 13 | 3544  | 1.70 (1.39-2.09)  | 1                                                                                 | AGREE | 1 | 3 |
| Mei Z          | 2017 | NLR | NSCLC                     | OS | 7  | 1386  | 1.20 (1.08-1.34)  | 1.416666667                                                                       |       |   |   |
| Peng B         | 2015 | NLR | NSCLC                     | OS | 11 | 2274  | 1.43 (1.25-1.64)  | 1.188811189                                                                       |       |   |   |
| Lu Y           | 2020 | NLR | NSCLC                     | OS | 21 | 5141  | 1.4 (1.26-1.55)   | 1.214285714                                                                       |       |   |   |
| Huang Y        | 2017 | NLR | Oesophageal               | OS | 9  | 2513  | 1.31 (1.16-1.48)  | 1.282442748                                                                       | AGREE | 1 | 5 |
| Yang X         | 2015 | NLR | Oesophageal               | OS | 6  | 1633  | 1.54 (1.32-1.80)  | 1.090909091                                                                       |       |   |   |
| Yodying H      | 2016 | NLR | Oesophageal               | OS | 7  | 1540  | 1.40 (1.08-1.81)  | 1.2                                                                               |       |   |   |
| Paramanathan A | 2014 | NLR | Oesophageal Solid Tumours | OS | 3  | 559   | 1.48 (0.91-2.42)  | <i>Dissagreement in significance disregarded due to small sample size (&lt;5)</i> |       |   |   |
| Zhang X        | 2018 | NLR | Oesophageal               | OS | 26 | 8985  | 1.39 (1.23-1.54)  | 1.208633094                                                                       |       |   |   |
| Pirozzolo G    | 2019 | NLR | Oesophageal               | OS | 20 | 6457  | 1.68 (1.46-1.93)  | 1                                                                                 |       |   |   |
| Huang QT       | 2017 | NLR | Ovarian                   | OS | 12 | 3935  | 1.69 (1.29-2.22)  | 1.307692308                                                                       | AGREE | 1 | 8 |
| Yang Z         | 2017 | NLR | Ovarian                   | OS | 10 | 2320  | 1.72 (1.18-2.51)  | 1.284883721                                                                       |       |   |   |
| Paramanathan A | 2014 | NLR | Ovarian Solid Tumours     | OS | 2  | 321   | 2.02 (0.18-22.57) | <i>Dissagreement in significance disregarded due to small sample size (&lt;5)</i> |       |   |   |
| Chen S         | 2017 | NLR | Ovarian                   | OS | 11 | 2017* | 1.51 (1.03-2.23)  | 1.463576159                                                                       |       |   |   |
| Chen G         | 2018 | NLR | Ovarian                   | OS | 11 | 3702  | 1.41 (1.11-1.79)  | 1.567375887                                                                       |       |   |   |
| Zhao Z         | 2018 | NLR | Ovarian                   | OS | 12 | 3261  | 1.70 (1.35-2.15)  | 1.3                                                                               |       |   |   |
| Zhou Q         | 2017 | NLR | Ovarian                   | OS | 16 | 4910  | 1.50 (1.27-1.77)  | 1.473333333                                                                       |       |   |   |
| Zhu Y          | 2018 | NLR | Ovarian                   | OS | 8  | 1915  | 2.21 (1.95-2.52)  | 1                                                                                 |       |   |   |
| Yin X          | 2019 | NLR | Ovarian                   | OS | 10 | 2400  | 1.34 (1.16-1.54)  | 1.649253731                                                                       |       |   |   |
| Cheng H        | 2015 | NLR | Pancreatic                | OS | 9  | 2035  | 1.59 (1.41-1.79)  | 1.641509434                                                                       | AGREE | 1 | 4 |
| Mei Z          | 2017 | NLR | Pancreatic                | OS | 9  | 1983  | 2.04 (1.50-2.75)  | 1.279411765                                                                       |       |   |   |
| Te             | 2014 | NLR | Pancreatic                | OS | 4  | 466   | 2.27 (1.01-5.14)  | 1.149779736                                                                       |       |   |   |
| Yang JJ        | 2015 | NLR | Pancreatic                | OS | 8  | 959   | 2.61 (1.68-4.06)  | 1                                                                                 |       |   |   |
| Zhou Y         | 2018 | NLR | Pancreatic                | OS | 43 | NA    | 1.81 (1.59-2.05)  | 1.44198895                                                                        |       |   |   |
| Cao J          | 2016 | NLR | Prostate                  | OS | 16 | 15298 | 1.41 (1.26-1.55)  | 1.120567376                                                                       | AGREE | 1 | 6 |
| Gu X           | 2016 | NLR | Prostate                  | OS | 11 | 14250 | 1.38 (1.22-1.56)  | 1.144927536                                                                       |       |   |   |
| Luo Y          | 2015 | NLR | Prostate                  | OS | 5  | 2310  | 1.44 (1.28-1.62)  | 1.097222222                                                                       |       |   |   |
| Mei Z          | 2017 | NLR | Prostate                  | OS | 5  | 2019  | 1.43 (1.26-1.62)  | 1.104895105                                                                       |       |   |   |
| Wei Y          | 2014 | NLR | Prostate                  | OS | 2  | 377   | 1.33 (0.99-1.80)  | <i>Dissagreement in significance disregarded due to small sample size (&lt;5)</i> |       |   |   |
| Guo J          | 2018 | NLR | Prostate                  | OS | 13 | 4917  | 1.58 (1.41-1.78)  | 1                                                                                 |       |   |   |
| Su S           | 2019 | NLR | Prostate                  | OS | 2  | 2230  | 1.35 (1.20-1.51)  | 1.17037037                                                                        |       |   |   |
| Hu K           | 2015 | NLR | Renal                     | OS | 13 | 3034  | 1.82 (1.51-2.19)  | 1.06043956                                                                        | AGREE | 1 | 5 |

|                |      |     |                           |     |    |        |                  |             |                                                                                   |       |   |   |  |  |
|----------------|------|-----|---------------------------|-----|----|--------|------------------|-------------|-----------------------------------------------------------------------------------|-------|---|---|--|--|
| Luo Y          | 2015 | NLR | Renal                     | OS  | 14 | 3373   | 1.79 (1.61-2.00) | 1.078212291 | <i>Dissagreement in significance disregarded due to small sample size (&lt;5)</i> |       |   |   |  |  |
| Mei Z          | 2017 | NLR | Renal                     | OS  | 9  | 1689   | 1.91 (1.58-2.32) | 1.010471204 |                                                                                   |       |   |   |  |  |
| Na N           | 2016 | NLR | Renal                     | OS  | 8  | 1220   | 1.93 (1.35-2.77) | 1           |                                                                                   |       |   |   |  |  |
| Wei Y          | 2014 | NLR | Renal                     | OS  | 9  | 1764   | 1.90 (1.47-2.45) | 1.015789474 |                                                                                   |       |   |   |  |  |
| Su S           | 2019 | NLR | Renal                     | OS  | 3  | 1174   | 1.05 (0.71-1.53) |             |                                                                                   |       |   |   |  |  |
| Paramanathan A | 2014 | NLR | All Solid Tumours         | OS  | 36 | 8626   | 1.92 (1.64-2.24) | 1           |                                                                                   | AGREE | 1 | 1 |  |  |
| Mei Z          | 2017 | NLR | Composite endpoints       | OS  | 65 | 18262* | 1.70 (1.57-1.84) | 1.129411765 |                                                                                   |       |   |   |  |  |
| Li X           | 2017 | NLR | Upper Urinary and Bladder | OS  | 17 | 4432   | 1.72 (1.45-2.05) | 1           |                                                                                   | AGREE | 1 | 4 |  |  |
| Luo Y          | 2015 | NLR | Bladder                   | OS  | 4  | 1810   | 1.68 (1.45-1.94) | 1.023809520 |                                                                                   |       |   |   |  |  |
| Tang X         | 2017 | NLR | Bladder                   | OS  | 11 | 3093   | 1.19 (1.07-1.31) | 1.445378151 |                                                                                   |       |   |   |  |  |
| Wu S           | 2018 | NLR | Bladder                   | OS  | 9  | 4151   | 1.27 (1.12-1.43) | 1.354330709 |                                                                                   |       |   |   |  |  |
| Hu G           | 2019 | NLR | Bladder                   | OS  | 18 | 11945  | 1.23 (1.13-1.33) | 1.398373984 |                                                                                   |       |   |   |  |  |
| Lucca I        | 2015 | NLR | Urothelial Carcinoma      | OS  | 4  | 5452   | 1.11 (1.01-1.22) | 1.774774775 |                                                                                   | AGREE | 1 | 3 |  |  |
| Marchioni M    | 2017 | NLR | Urothelial Carcinoma      | OS  | 2  | 397    | 1.97 (1.27-3.04) | 1           |                                                                                   |       |   |   |  |  |
| Vartolomei M   | 2018 | NLR | Urothelial Carcinoma      | OS  | 3  | 822    | 1.64 (1.23-2.17) | 1.201219512 |                                                                                   |       |   |   |  |  |
| Su S           | 2019 | NLR | Urothelial Carcinoma      | OS  | 7  | 2554   | 1.29 (1.03-1.61) | 1.527131783 |                                                                                   |       |   |   |  |  |
| Huang QT       | 2017 | NLR | Cervical                  | PFS | 5  | 2607   | 1.65 (1.18-2.29) | 1           |                                                                                   | AGREE | 1 | 1 |  |  |
| Wu J           | 2017 | NLR | Cervical                  | PFS | 10 | 2452   | 1.65 (1.31-2.07) | 1           |                                                                                   |       |   |   |  |  |
| Li MX          | 2014 | NLR | Colorectal                | PFS | 10 | 2718*  | 2.10 (1.55-2.84) | 1           |                                                                                   | AGREE | 1 | 2 |  |  |
| Mei Z          | 2017 | NLR | Colorectal                | PFS | 5  | 549    | 1.91 (1.31-2.79) | 1.09947644  |                                                                                   |       |   |   |  |  |
| Zheng DC       | 2016 | NLR | Colorectal                | PFS | 14 | 3662   | 1.92 (1.51-2.44) | 1.09375     |                                                                                   |       |   |   |  |  |
| Chen J         | 2015 | NLR | Gastric                   | PFS | 2  | 282    | 2.78 (1.95-3.96) | 1           |                                                                                   | AGREE | 1 | 1 |  |  |
| Zhang X        | 2014 | NLR | Gastric                   | PFS | 2  | 314    | 1.54 (1.22-1.95) | 1.805194805 |                                                                                   |       |   |   |  |  |
| Yang HB        | 2016 | NLR | Lung (both)               | PFS | 7  | 1186*  | 1.18 (1.08-1.29) | 1.203389831 |                                                                                   | AGREE | 1 | 2 |  |  |
| Zhao QT        | 2015 | NLR | Lung (both)               | PFS | 9  | 1748   | 1.33 (1.07-1.67) | 1.067669173 |                                                                                   |       |   |   |  |  |
| Yu Y           | 2017 | NLR | Lung (both)               | PFS | 8  | 1581   | 1.42 (1.15-1.75) | 1           |                                                                                   |       |   |   |  |  |
| Su L           | 2017 | NLR | Nasopharyngeal            | PFS | 4  | 1934   | 1.67 (1.36-2.06) | 1           |                                                                                   | AGREE | 1 | 4 |  |  |
| Yu B           | 2017 | NLR | Nasopharyngeal            | PFS | 2  | 462    | 1.57 (1.19-2.09) | 1.063694268 |                                                                                   |       |   |   |  |  |
| Takenaka Y     | 2017 | NLR | Nasopharyngeal            | PFS | 3  | 1872   | 1.53 (1.22-1.90) | 1.091503268 |                                                                                   |       |   |   |  |  |
| Yin J          | 2017 | NLR | Nasopharyngeal            | PFS | 5  | 4130   | 1.48 (1.30-1.69) | 1.128378378 |                                                                                   |       |   |   |  |  |

|                |      |     |                                                        |     |    |                   |                  |                                                                                |       |   |   |
|----------------|------|-----|--------------------------------------------------------|-----|----|-------------------|------------------|--------------------------------------------------------------------------------|-------|---|---|
| Yang S         | 2019 | NLR | Nasopharyngeal                                         | PFS | 4  | 2012              | 1.67 (1.36-2.07) | 1                                                                              |       |   |   |
| Gu XB          | 2015 | NLR | NSCLC                                                  | PFS | 10 | 2623              | 1.63 (1.27-2.09) | 1                                                                              |       |   |   |
| Mei Z          | 2017 | NLR | NSCLC                                                  | PFS | 5  | 1140              | 1.38 (1.06-1.80) | 1.18115942                                                                     | AGREE | 1 | 3 |
| Peng B         | 2015 | NLR | NSCLC                                                  | PFS | 5  | 1052              | 1.37 (1.07-1.74) | 1.189781022                                                                    |       |   |   |
| Lu Y           | 2020 | NLR | NSCLC                                                  | PFS | 3  | 701               | 1.55 (1.27-1.88) | 1.051612903                                                                    |       |   |   |
| Huang QT       | 2017 | NLR | Ovarian                                                | PFS | 8  | 2152              | 1.63 (1.27-2.09) | 1.36196319                                                                     |       |   |   |
| Yang Z         | 2017 | NLR | Ovarian                                                | PFS | 7  | 1863              | 1.80 (1.22-2.65) | 1.233333333                                                                    | AGREE | 1 | 7 |
| Chen G         | 2018 | NLR | Ovarian                                                | PFS | 8  | 2991              | 1.52 (1.19-1.95) | 1.460526316                                                                    |       |   |   |
| Chen S         | 2017 | NLR | Ovarian                                                | PFS | 7  | 851*              | 1.55 (1.15-2.08) | 1.432258065                                                                    |       |   |   |
| Zhao Z         | 2018 | NLR | Ovarian                                                | PFS | 11 | 2713              | 1.77 (1.48-2.12) | 1.254237288                                                                    |       |   |   |
| Zhou Q         | 2017 | NLR | Ovarian                                                | PFS | 12 | 3884              | 1.53 (1.28-1.84) | 1.450980392                                                                    |       |   |   |
| Zhu Y          | 2018 | NLR | Ovarian                                                | PFS | 5  | 1069              | 2.22 (1.92-2.57) | 1                                                                              |       |   |   |
| Yin X          | 2019 | NLR | Ovarian                                                | PFS | 10 | 2400              | 1.36 (1.17-1.57) | 1.632352941                                                                    |       |   |   |
| Luo Y          | 2015 | NLR | Renal                                                  | PFS | 7  | 753               | 1.85 (1.24-2.77) | 1.145945946                                                                    | AGREE | 1 | 2 |
| Mei Z          | 2017 | NLR | Renal                                                  | PFS | 5  | 930               | 1.49 (1.18-1.89) | 1.422818792                                                                    |       |   |   |
| Na N           | 2016 | NLR | Renal                                                  | PFS | 8  | 1115*             | 2.12 (1.42-3.17) | 1                                                                              |       |   |   |
| Li X           | 2017 | NLR | Upper Urinary and Bladder                              | PFS | 19 | 8182              | 1.68 (1.44-1.96) | 0.007936508                                                                    | AGREE | 1 | 2 |
| Tang X         | 2017 | NLR | Bladder                                                | PFS | 6  | 3327              | 1.33 (1.19-1.49) | 0.01025641                                                                     |       |   |   |
| Wu S           | 2018 | NLR | Bladder                                                | PFS | 7  | 6771              | 1.75 (1.36-2.15) | 1                                                                              |       |   |   |
| Cao J          | 2016 | NLR | Prostate Castration Resistant                          | PFS | 6  | 1629              | 1.42 (1.23-1.61) | 1.387323944                                                                    | AGREE | 1 | 1 |
| Yin X          | 2016 | NLR | Prostate Castration Resistant                          | PFS | 4  | 1010              | 1.97 (1.28-3.04) | 1                                                                              |       |   |   |
| Xiao WK        | 2014 | NLR | HCC Resection                                          | OS  | 2  | 1054              | 3.33 (2.23-4.98) | 1.057057057                                                                    | AGREE | 1 | 2 |
| Paramanathan A | 2014 | NLR | HCC Resection of Solid Tumours                         | OS  | 4  | 566               | 3.52 (2.34-5.28) | <i>Dissagreement in magnitude disregarded due to small sample size (&lt;5)</i> |       |   |   |
| Wang Y         | 2018 | NLR | Hepatocellular Resection                               | OS  | 13 | 4225 (1336/2723)* | 1.52 (1.37-1.69) | 2.315789474                                                                    |       |   |   |
| Paramanathan A | 2014 | NLR | Colorectal Liver Metastasis Resection of Solid Tumours | OS  | 3  | 814               | 2.28 (1.77-2.93) | 1                                                                              | AGREE | 1 | 1 |

|                |      |     |                                                |     |    |                  |                   |                                                                                   |       |   |   |
|----------------|------|-----|------------------------------------------------|-----|----|------------------|-------------------|-----------------------------------------------------------------------------------|-------|---|---|
| Tang H         | 2016 | NLR | Colorectal Liver Metastasis Surgical Resection | OS  | 5  | 1309             | 2.08 (1.73-2.49)  | 1.096153846                                                                       |       |   |   |
| Cao J          | 2016 | NLR | Prostate Localised                             | RFS | 7  | 11745            | 1.38 (1.01-1.75)  | 1                                                                                 |       |   |   |
| Yin X          | 2016 | NLR | Prostate Localised                             | RFS | 4  | 9553             | 1.34 (0.89-2.02)  | <i>Dissagreement in significance disregarded due to small sample size (&lt;5)</i> | AGREE | 1 | 1 |
| Paramanathan A | 2014 | NLR | Gastric Resection of Solid Tumours             | OS  | 7  | 2334             | 1.97 (1.41-2.76)  | 1.467005076                                                                       |       |   |   |
| Mellor K       | 2018 | NLR | potentially curative gastrectomy               | OS  | 5  | 2787 (1338/1449) | 2.31 (1.40-3.83)  | 1.251082250                                                                       | AGREE | 1 | 2 |
| Szor D         | 2018 | NLR | Gastric Resection                              | OS  | 7  | 3223 (1018/2205) | 2.89 (2.41-3.47)  | 1                                                                                 |       |   |   |
| Vartolomei M   | 2018 | NLR | Urothelial Carcinoma                           | RFS | 6  | 3563             | 1.60 (1.16-2.20)  | 1                                                                                 |       |   |   |
| Marchioni M    | 2017 | NLR | Urothelial Carcinoma                           | RFS | 4  | 1313             | 1.52 (1.19-1.96)  | 1.052631579                                                                       | AGREE | 1 | 1 |
| Xiao WK        | 2014 | NLR | Hepatocellular Transplant                      | OS  | 5  | 788 (123/665)    | 3.42 (2.41-4.85)  | 1                                                                                 |       |   |   |
| Sun XD         | 2016 | NLR | Hepatocellular Transplant                      | OS  | 7  | 1243 (264/979)   | 2.71 (1.91-3.83)  | 1.258302583                                                                       | AGREE | 1 | 2 |
| Xu ZG          | 2018 | NLR | Hepatocellular Transplant                      | OS  | 8  | 1230 (352/878)   | 2.22 (1.34-3.68)  | 1.540540541                                                                       |       |   |   |
| Ding Y         | 2018 | NLR | Melanoma                                       | OS  | 10 | 3207             | 2.23 (1.64-3.04)  | 1                                                                                 |       |   |   |
| Zhan H         | 2018 | NLR | Melanoma                                       | OS  | 10 | 4437             | 1.56 (1.28-1.90)  | 1.429487179                                                                       | AGREE | 1 | 1 |
| Li Y           | 2016 | NLR | Soft Tissue Sarcoma                            | OS  | 3  | 494              | 3.75 (1.24-11.37) | <i>Dissagreement in magnitude disregarded due to small sample size (&lt;5)</i>    |       |   |   |
| Liu G          | 2018 | NLR | Soft Tissue Sarcoma                            | OS  | 13 | 2658*            | 1.59 (1.28-1.97)  | 2.358490566                                                                       | AGREE | 1 | 2 |
| Li LQ          | 2020 | NLR | Soft Tissue Sarcoma                            | OS  | 12 | 1865             | 2.08 (1.60-2.69)  | 1.802884615                                                                       |       |   |   |
| Mascarella M   | 2018 | NLR | Head and Neck                                  | OS  | 24 | 6917             | 1.78 (1.53-2.07)  | 1.039325843                                                                       |       |   |   |
| Takenaka Y     | 2018 | NLR | Head and Neck                                  | OS  | 17 | 3371             | 1.69 (1.47-1.93)  | 1.094674556                                                                       |       |   |   |
| Tham T         | 2018 | NLR | Head and Neck                                  | OS  | 11 | 1972 (1137/835)  | 1.51 (1.32-1.73)  | 1.225165563                                                                       | AGREE | 1 | 4 |
| Yu Y           | 2018 | NLR | Head and Neck                                  | OS  | 14 | 4122             | 1.84 (1.53-2.23)  | 1.005434783                                                                       |       |   |   |
| Tham T         | 2018 | NLR | Head and Neck                                  | OS  | 26 | 6769             | 1.85 (1.58-2.17)  | 1                                                                                 |       |   |   |

|             |      |     |                                        |     |    |                   |                  |                                                                                   |       |   |   |
|-------------|------|-----|----------------------------------------|-----|----|-------------------|------------------|-----------------------------------------------------------------------------------|-------|---|---|
| Xiao WK     | 2014 | NLR | Hepatocellular Resection               | DFS | 2  | 370 (172/198)     | 1.07 (0.82-1.40) | <i>Dissagreement in significance disregarded due to small sample size (&lt;5)</i> | AGREE | 1 | 1 |
| Wang Y      | 2018 | NLR | Hepatocellular Resection               | DFS | 7  | 1272 (581/691)    | 1.50 (1.35-1.67) | 1                                                                                 |       |   |   |
| Jiang T     | 2018 | NLR | Immune checkpoint blockage             | OS  | 4  | 1291              | 2.16 (1.86-2.51) | 1.208333333                                                                       | AGREE | 1 | 4 |
| Tan Q       | 2018 | NLR | Immune checkpoint inhibitors           | OS  | 18 | 1863              | 2.26 (1.68-3.03) | 1.154867257                                                                       |       |   |   |
| Saccdalan D | 2018 | NLR | Immune checkpoint inhibitors           | OS  | 3  | 220               | 2.52 (1.58-4.02) | 1.035714286                                                                       |       |   |   |
| Saccdalan D | 2018 | NLR | Composite endpoints (immune inhibitor) | OS  | 7  | 765               | 1.92 (1.29-2.87) | 1.359375                                                                          |       |   |   |
| Xie X       | 2019 | NLR | Immune checkpoint inhibitors           | OS  | 14 | 1449              | 2.61 (1.77-3.86) | 1                                                                                 |       |   |   |
| Min GT      | 2018 | NLR | Hepatocellular                         | DFS | 17 | 3881 (919/1729)*  | 1.71 (1.39-2.11) | 1.444444444                                                                       | AGREE | 1 | 1 |
| Xue TC      | 2014 | NLR | Hepatocellular                         | DFS | 17 | 3184 (1025/2159)  | 2.47 (1.86-3.30) | 1                                                                                 |       |   |   |
| Min GT      | 2018 | NLR | Hepatocellular                         | RFS | 16 | 5037 (1470/3188)* | 1.84 (1.48-2.30) | 1                                                                                 | AGREE | 1 | 1 |
| Zheng       | 2017 | NLR | Hepatocellular                         | RFS | 12 | 2792              | 1.45 (1.16-1.82) | 0.008210181                                                                       |       |   |   |
| Luo Y       | 2015 | NLR | Bladder                                | RFS | 2  | 531               | 1.55 (1.21-2.00) | 1.019354839                                                                       | AGREE | 1 | 2 |
| Tang X      | 2017 | NLR | Bladder                                | RFS | 8  | 4850              | 1.58 (1.24-2.03) | 1                                                                                 |       |   |   |
| Wu S        | 2018 | NLR | Bladder                                | RFS | 9  | 8075              | 1.41 (1.23-1.60) | 1.120567376                                                                       |       |   |   |
| Tang H      | 2017 | NLR | Biliary Tract                          | OS  | 14 | 3217 (1295/1710)* | 1.51 (1.36-1.67) | 1                                                                                 | AGREE | 1 | 1 |
| Tan DW      | 2016 | NLR | Cholangiocarcinoma                     | OS  | 12 | 2093              | 1.45 (1.30-1.62) | 1.04137931                                                                        |       |   |   |
| Tan Q       | 2018 | NLR | Immune checkpoint inhibitors           | PFS | 11 | 1274              | 1.81 (1.36-2.41) | 1                                                                                 | AGREE | 1 | 3 |
| Saccdalan D | 2018 | NLR | Immune checkpoint inhibitors           | PFS | 3  | 220               | 1.76 (1.25-2.47) | 1.028409091                                                                       |       |   |   |

|             |      |     |                                          |     |    |                  |                  |             |       |   |   |
|-------------|------|-----|------------------------------------------|-----|----|------------------|------------------|-------------|-------|---|---|
| Sacidalan D | 2018 | NLR | Composite endpoints (immune inhibitor)   | PFS | 5  | 592              | 1.66 (1.38-2.01) | 1.090361446 |       |   |   |
| Xie X       | 2019 | NLR | Immune checkpoint inhibitors             | PFS | 11 | 1114             | 1.74 (1.34-2.27) | 1.040229885 |       |   |   |
| Li H        | 2019 | NLR | Colorectal Surgical Resection            | DFS | 9  | 4237             | 1.54 (1.18–2.02) | 1.363636364 |       |   |   |
| Malietzis G | 2014 | NLR | Colorectal with Surgical Bowel Resection | DFS | 7  | 2408 (797/1611)* | 2.10 (1.50-2.93) | 1           | AGREE | 1 | 1 |
| Zhang J     | 2017 | NLR | Glioma                                   | OS  | 6  | 1021             | 1.48 (1.25-1.76) | 1           |       |   |   |
| Lei Y       | 2019 | NLR | Glioma                                   | OS  | 16 | 2275             | 1.43 (1.27-1.62) | 1.034965035 | AGREE | 1 | 2 |
| Wang D      | 2020 | NLR | Glioma                                   | OS  | 15 | 2798             | 1.38 (1.09-1.74) | 1.072463768 |       |   |   |
| Yu Y        | 2018 | NLR | Head and Neck                            | DFS | 4  | 780              | 1.99 (1.46-2.71) | 1           |       |   |   |
| Tham T      | 2018 | NLR | Head and neck                            | DFS | 11 | 1692             | 1.66 (1.30-2.11) | 1.198795181 | AGREE | 1 | 1 |
| Yu Y        | 2018 | NLR | Head and Neck                            | PFS | 5  | 1997             | 2.17 (1.20-3.92) | 1           |       |   |   |
| Tham T      | 2018 | NLR | Head and neck                            | PFS | 6  | 2173             | 1.43 (1.09-1.87) | 1.517482517 | AGREE | 1 | 1 |
| Yang L      | 2019 | NLR | head and neck squamous cell carcinoma    | DFS | 9  | 2406             | 1.76 (1.42-2.17) | 1.079545455 |       |   |   |
| Cho J       | 2018 | NLR | head and neck squamous cell carcinoma    | DFS | 12 | 2079             | 1.9 (1.41–2.54)  | 1           | AGREE | 1 | 1 |
| Yang L      | 2019 | NLR | head and neck squamous cell carcinoma    | OS  | 23 | 6834             | 1.68 (1.39-2.03) | 1.166666667 |       |   |   |
| Cho J       | 2018 | NLR | head and neck squamous cell carcinoma    | OS  | 24 | 5650             | 1.96 (1.66–2.31) | 1           | AGREE | 1 | 1 |
| Xu W        | 2018 | NLR | Hepatocellular (TACE)                    | OS  | 6  | NA               | 1.53 (1.29-1.78) | 1.183006536 |       |   |   |
| Li S        | 2020 | NLR | Hepatocellular (TACE)                    | OS  | 16 | 4023             | 1.81 (1.66-1.97) | 1           | AGREE | 1 | 2 |
| Xiao WK     | 2014 |     | Hepatocellular TACE                      | OS  | 3  | 360 (102/258)    | 2.52 (1.64-3.86) | 1           |       |   |   |

|              |      |     |                                            |     |    |      |                    |                                                                                   |              |   |   |
|--------------|------|-----|--------------------------------------------|-----|----|------|--------------------|-----------------------------------------------------------------------------------|--------------|---|---|
| Mascarella M | 2018 | NLR | Hypopharynx                                | OS  | 3  | 305  | 2.36 (1.54-3.61)   | 1.220338983                                                                       | AGREE        | 1 | 1 |
| Yang L       | 2019 | NLR | Hypopharynx                                | OS  | 3  | 310  | 2.88 (2.06-4.03)   | 1                                                                                 |              |   |   |
| Sacidalan D  | 2018 | NLR | Ipilimumab                                 | OS  | 2  | 255  | 2.05 (1.54-2.74)   | 1.243902439                                                                       | AGREE        | 1 | 1 |
| Xie X        | 2019 | NLR | Ipilimumab                                 | OS  | 7  | 798  | 2.55 (1.47-4.42)   | 1                                                                                 |              |   |   |
| Mascarella M | 2018 | NLR | Larynx                                     | OS  | 6  | 1017 | 1.55 (1.26-1.92)   | 1.064516129                                                                       | AGREE        | 1 | 2 |
| Yang L       | 2019 | NLR | Larynx                                     | OS  | 4  | 826  | 1.65 (1.24-2.19)   | 1                                                                                 |              |   |   |
| Tham T       | 2018 | NLR | Larynx                                     | OS  | 4  | 821  | 1.6 (1.27-2.03)    | 1.03125                                                                           |              |   |   |
| Sacidalan D  | 2018 | NLR | Melanoma (immune inhibitor)                | OS  | 3  | 339  | 2.18 (1.66-2.84)   | 1.151376147                                                                       | AGREE        | 1 | 1 |
| Xie X        | 2019 | NLR | Melanoma with Immune checkpoint inhibitors | OS  | 9  | 1104 | 2.51 (1.56-4.02)   | 1                                                                                 |              |   |   |
| Sacidalan D  | 2018 | NLR | Melanoma (immune inhibitor)                | PFS | 2  | 281  | 1.73 (1.33-2.25)   | 1.196531792                                                                       | AGREE        | 1 | 1 |
| Xie X        | 2019 | NLR | Melanoma with Immune checkpoint inhibitors | PFS | 4  | 467  | 2.07 (1.78-2.41)   | 1                                                                                 |              |   |   |
| Li X         | 2018 | NLR | Neoadjuvant Chemotherapy                   | DFS | 11 | 1719 | 1.32 (1.10-1.59)   | 1                                                                                 | DO NOT AGREE | 0 | 2 |
| Xue L        | 2019 | NLR | Neoadjuvant chemotherapy                   | DFS | 5  | 1242 | 1.18 (0.78-1.78)   | 1.118644068                                                                       |              |   |   |
| Li X         | 2018 | NLR | Neoadjuvant Chemotherapy                   | OS  | 18 | 3282 | 1.58 (1.34-1.86)   | 1.760126582                                                                       | AGREE        | 1 | 1 |
| Xue L        | 2019 | NLR | Neoadjuvant chemotherapy                   | OS  | 3  | 701  | 2.781 (0.54-14.32) | <i>Dissagreement in significance disregarded due to small sample size (&lt;5)</i> |              |   |   |
| Xie X        | 2019 | NLR | Nivolumab                                  | OS  | 6  | 442  | 2.58 (1.92-3.48)   | 1                                                                                 | AGREE        | 1 | 1 |
| Sacidalan D  | 2018 | NLR | Nivolumab                                  | OS  | 2  | 290  | 1.43 (0.77-2.69)   | <i>Dissagreement in significance disregarded due to small sample size (&lt;5)</i> |              |   |   |
| Sacidalan D  | 2018 | NLR | NSCLC (immune inhibitor)                   | OS  | 3  | 342  | 1.63 (0.92-2.88)   | <i>Dissagreement in significance disregarded due to small sample size (&lt;5)</i> | AGREE        | 1 | 2 |



|              |      |     |                                              |     |    |      |                     |             |                                                                        |       |   |   |
|--------------|------|-----|----------------------------------------------|-----|----|------|---------------------|-------------|------------------------------------------------------------------------|-------|---|---|
| Xie X        | 2019 | NLR | NSCLC with Immune checkpoint inhibitors      | OS  | 4  | 307  | 2.62 (1.40-4.65)    | 1           |                                                                        |       |   |   |
| Wang Z       | 2019 | NLR | NSCLC immuno                                 | OS  | 8  | 1396 | 2.5 (1.60-3.89)     | 1.048       |                                                                        |       |   |   |
| Sacidalan D  | 2018 | NLR | NSCLC (immune inhibitor)                     | PFS | 2  | 227  | 1.56 (1.14-2.13)    | 1           |                                                                        |       |   |   |
| Xie X        | 2019 | NLR | NSCLC with Immune checkpoint inhibitors      | PFS | 6  | 609  | 1.39 (1.09-1.78)    | 1.122302158 | AGREE                                                                  | 1     | 2 |   |
| Wang Z       | 2019 | NLR | NSCLC immuno                                 | PFS | 4  | 585  | 1.53 (1.27-1.84)    | 1.019607843 |                                                                        |       |   |   |
| Zhang X      | 2018 | NLR | Oesophageal                                  | PFS | 4  | 908  | 1.4 (1.15-1.65)     | 1.185714286 |                                                                        |       |   |   |
| Pirozzolo G  | 2019 | NLR | Oesophageal                                  | PFS | 2  | 1046 | 1.66 (1.43-1.93)    | 1           |                                                                        |       |   |   |
| Huang Y      | 2017 | NLR | Oesophageal                                  | PFS | 2  | 253  | 1.22 (0.90-1.66)    |             | Disagreement in significance disregarded due to small sample size (<5) | AGREE | 1 | 2 |
| Zhang X      | 2018 | NLR | Oesophageal Surgery                          | OS  | 22 | 7119 | 1.349 (1.188-1.509) | 1.089696071 |                                                                        |       |   |   |
| Ishibashi Y  | 2020 | NLR | Oesophageal with SR                          | OS  | 9  | 4128 | 1.47 (1.32-1.63)    | 1           | AGREE                                                                  | 1     | 1 |   |
| Mascarella M | 2018 | NLR | Oral cavity                                  | OS  | 3  | 1899 | 1.56 (1.53-2.07)    | 1.032051282 |                                                                        |       |   |   |
| Yang Y       | 2018 | NLR | Oral cavity                                  | OS  | 9  | 2373 | 1.61 (1.39-1.86)    | 1           | AGREE                                                                  | 1     | 1 |   |
| Luo Y        | 2015 | NLR | Prostate                                     | PFS | 2  | 881  | 1.29 (1.04-1.59)    | 1.511627907 |                                                                        |       |   |   |
| Guo J        | 2018 | NLR | Prostate                                     | PFS | 7  | 1088 | 1.95 (1.53-2.49)    | 1           | AGREE                                                                  | 1     | 1 |   |
| Yang L       | 2019 | NLR | Oral cavity squamous cell carcinoma          | OS  | 5  | 3234 | 1.59 (1.36-1.85)    | 1           |                                                                        |       |   |   |
| Wang Y       | 2018 | NLR | Oral Squamous Cell Carcinoma                 | OS  | 6  | 1360 | 1.56 (1.28-1.90)    | 1.019230769 | AGREE                                                                  | 1     | 1 |   |
| Suh J        | 2019 | NLR | Urothelial Carcinoma with nephroureterectomy | CSS | 8  | 4893 | 1.68 (1.23-2.31)    | 1           |                                                                        |       |   |   |
| Mori K       | 2020 | NLR | UTUC treated with nephroureterectomy         | CSS | 12 | 6350 | 1.66 (1.34-2.06)    | 1.012048193 | AGREE                                                                  | 1     | 1 |   |

N=number of component studies with in review, (NA) Not Applicable, (HR) Hazard ratio, (NLR) Neutrophil to Lymphocyte Ratio, (IN) Intratumoural Neutrophils, (PN) Peritumoural Neutrophils, (SN) Stromal Neutrophils, (OS) Overall Survival, (DFS) Disease-Free Survival, (PFS) Progression-Free Survival, (RFS) Reoccurrence-Free Survival, (CSS) Cancer Specific Survival, (SBR) Surgical Bowel Resection, (SR) Surgical Resection, (CLM) Colorectal Liver Metastasis, (NS) Non-surgical, (HCC) Hepatocellular Carcinoma, (TACE) Trans-Arterial Chemoembolization, (MPM) Malignant Pleural Mesothelioma, (NSCLC) Non-Small Cell Lung Cancer, (NHC) Neck and Head Cancer.

(\*) Composite endpoints are defined as a grouping of cancer diagnosis unrelated to site, stage or treatment unless otherwise specified.

(†) Review reported incomplete data on sample size

## Appendix D: Description of 87 meta-analyses with poor reproducibility

| Author         | Year | Biomarker | Cancer site                                  | meta-analysis metric | N   | Sample size (HNLN/LNLR) | Reported Effect size and 95% CI |             |             | % difference | Calculated Effect Size and 95% CI |      |             |             |
|----------------|------|-----------|----------------------------------------------|----------------------|-----|-------------------------|---------------------------------|-------------|-------------|--------------|-----------------------------------|------|-------------|-------------|
|                |      |           |                                              |                      |     |                         | HR                              | Lower Limit | Upper Limit |              | Random or Fixed                   | HR   | Lower Limit | Upper Limit |
| Jiang T        | 2018 | NLR       | Advanced Cancer (Anti-VEGFR)                 | OS                   | 14  | 2918                    | 2.04                            | 1.61        | 2.6         | 0.99%        | R                                 | 2.02 | 1.61        | 2.53        |
| Jiang T        | 2018 | NLR       | Advanced Cancer (Immunotherapy)              | OS                   | 23  | 4355                    | 1.98                            | 1.66        | 2.36        | 1.53%        | R                                 | 1.95 | 1.67        | 2.29        |
| Mei Z          | 2017 | NLR       | Composite endpoints                          | OS                   | 65  | 18262*                  | 1.7                             | 1.57        | 1.84        | 1.18%        | R                                 | 1.68 | 1.56        | 1.82        |
| Paramanathan A | 2014 | NLR       | Composite endpoints                          | DFS                  | 20  | 13065                   | 1.99                            | 1.8         | 2.2         | 5.85%        | R                                 | 2.11 | 1.71        | 2.6         |
| Dolan R        | 2017 | NLR       | Composite endpoints Operable                 | OS                   | 120 | 68603 (18667/49936)     | 1.73                            | 1.56        | 1.91        | 4.13%        | R                                 | 1.66 | 1.55        | 1.77        |
| Dolan R        | 2017 | NLR       | Composite endpoints Operable                 | CSS                  | 41  | 21175 (4617/16558)      | 1.32                            | 1.24        | 1.41        | 12.77%       | R                                 | 1.5  | 1.35        | 1.67        |
| Tang H         | 2017 | NLR       | Biliary Tract                                | RFS                  | 5   | 637 (303/244)           | 1.46                            | 1.18        | 1.81        | 3.48%        | R                                 | 1.41 | 1.19        | 1.68        |
| Wu S           | 2018 | NLR       | Bladder                                      | RFS                  | 9   | 8075                    | 1.41                            | 1.23        | 1.6         | 7.51%        | F                                 | 1.52 | 1.29        | 1.79        |
| Li X           | 2017 | NLR       | Bladder and Upper Urinary                    | CSS                  | 17  | 7645                    | 1.64                            | 1.39        | 1.93        | 1.23%        | R                                 | 1.62 | 1.39        | 1.89        |
| Ethier JL      | 2017 | NLR       | Breast                                       | OS                   | 13  | 8015                    | 2.56                            | 1.96        | 3.35        | 0.78%        | R                                 | 2.54 | 1.96        | 3.3         |
| Liu X          | 2017 | NLR       | Breast                                       | DFS                  | 12  | 5523                    | 1.72                            | 1.3         | 2.27        | 4.15%        | R                                 | 1.65 | 1.3         | 2.1         |
| Liu X          | 2017 | NLR       | Breast                                       | CSS                  | 4   | 4186                    | 2.09                            | 1.04        | 4.21        | 2.91%        | R                                 | 2.03 | 1.08        | 3.82        |
| Chen J         | 2018 | NLR       | Breast (No Metastasis)                       | DFS                  | 2   | 466                     | 1.34                            | 0.5         | 3.58        | 42.53%       | R                                 | 0.87 | 0.56        | 1.35        |
| Wu J           | 2017 | NLR       | Cervical                                     | OS                   | 12  | 3661                    | 1.375                           | 1.2         | 1.58        | 6.00%        | R                                 | 1.46 | 1.21        | 1.76        |
| Wu J           | 2017 | NLR       | Cervical                                     | PFS                  | 10  | 2452                    | 1.65                            | 1.31        | 2.07        | 3.57%        | R                                 | 1.71 | 1.32        | 2.22        |
| Szor D         | 2018 | NLR       | Gastric (Surgical Resection)                 | OS                   | 7   | 3223 (1018/2205)        | 2.89                            | 2.41        | 3.47        | 7.97%        | F                                 | 3.13 | 1.99        | 4.92        |
| Zhou Y         | 2018 | NLR       | Gastroenteropancreatic Neuroendocrine Tumors | RFS                  | 3   | 300                     | 3.3                             | 2.04        | 5.32        | 1.22%        | R                                 | 3.26 | 2.01        | 5.29        |
| Ethier JL      | 2017 | NLR       | Gynecologic                                  | OS                   | 27  | 10530                   | 1.65                            | 1.44        | 1.89        | 4.15%        | R                                 | 1.72 | 1.46        | 2.03        |
| Min GT         | 2018 | NLR       | Hepatocellular                               | OS                   | 44  | 10491 (2594/5312)*      | 1.52                            | 1.39        | 1.67        | 7.59%        | R                                 | 1.64 | 1.41        | 1.9         |
| Min GT         | 2018 | NLR       | Hepatocellular                               | DFS                  | 17  | 3881 (919/1729)*        | 1.71                            | 1.39        | 2.11        | 6.23%        | R                                 | 1.82 | 1.4         | 2.37        |
| Xu ZG          | 2018 | NLR       | Hepatocellular (Transplant)                  | OS                   | 8   | 1230 (352/878)          | 2.22                            | 1.34        | 3.68        | 1.36%        | R                                 | 2.19 | 1.4         | 3.43        |
| Xu ZG          | 2018 | NLR       | Hepatocellular (Transplant)                  | RFS                  | 4   | 83 (251/372)*           | 3.77                            | 2.01        | 7.06        | 0.80%        | R                                 | 3.74 | 2.05        | 6.83        |

|                   |      |                          |                                 |     |    |                 |       |      |       |        |   |      |      |       |
|-------------------|------|--------------------------|---------------------------------|-----|----|-----------------|-------|------|-------|--------|---|------|------|-------|
| Sun XD            | 2016 | NLR                      | Hepatocellular (Transplant)     | DFS | 10 | 1637            | 3.61  | 2.23 | 5.84  | 1.65%  | R | 3.67 | 2.19 | 6.13  |
| Tan Q             | 2018 | NLR                      | Immune checkpoint inhibitors    | OS  | 18 | 1863            | 2.26  | 1.68 | 3.03  | 2.24%  | R | 2.21 | 1.7  | 2.88  |
| Tan Q             | 2018 | NLR                      | Immune checkpoint inhibitors    | PFS | 11 | 1274            | 1.81  | 1.36 | 2.41  | 3.37%  | R | 1.75 | 1.39 | 2.21  |
| Mu S              | 2018 | NLR                      | Large B                         | OS  | 10 | NA <sup>†</sup> | 1.83  | 1.24 | 2.69  | 1.63%  | R | 1.86 | 1.2  | 2.88  |
| Mascarella M      | 2018 | NLR                      | Larynx                          | OS  | 6  | 1017            | 1.55  | 1.26 | 1.92  | 1.28%  | R | 1.57 | 1.25 | 1.98  |
| Zhao QT           | 2015 | NLR                      | Lung (both)                     | OS  | 21 | 6942            | 1.51  | 1.33 | 1.71  | 2.61%  | R | 1.55 | 1.33 | 1.8   |
| Zhao QT           | 2015 | NLR                      | Lung (both)                     | PFS | 9  | 1748            | 1.33  | 1.07 | 1.67  | 3.69%  | R | 1.38 | 1.02 | 1.87  |
| Zhan H            | 2018 | NLR                      | Melanoma                        | OS  | 10 | 4437            | 1.56  | 1.28 | 1.9   | 2.53%  | R | 1.6  | 1.26 | 2.02  |
| Li X              | 2018 | NLR                      | Neoadjuvant Chemotherapy        | OS  | 18 | 3282            | 1.58  | 1.34 | 1.86  | 4.94%  | R | 1.66 | 1.36 | 2.04  |
| Li X              | 2018 | NLR                      | Neoadjuvant Chemotherapy        | CSS | 5  | 971             | 2.22  | 1.32 | 3.74  | 2.28%  | R | 2.17 | 1.35 | 3.47  |
| Vartolomei MD     | 2018 | NLR                      | Non muscle-invasive Bladder     | RFS | 6  | 2298            | 1.78  | 1.32 | 2.4   | 1.13%  | R | 1.76 | 1.33 | 2.32  |
| Gu XB             | 2015 | NLR                      | NSCLC                           | PFS | 10 | 2623            | 1.63  | 1.27 | 2.09  | 2.48%  | R | 1.59 | 1.29 | 1.95  |
| Zhou Q            | 2017 | NLR                      | Ovarian                         | PFS | 12 | 3884            | 1.53  | 1.28 | 1.84  | 3.22%  | R | 1.58 | 1.26 | 1.98  |
| Mowbray N         | 2018 | NLR                      | Pancreatic (Surgical Resection) | OS  | 8  | 1519            | 1.77  | 1.45 | 2.15  | 2.87%  | R | 1.72 | 1.48 | 2     |
| Cao J             | 2016 | NLR                      | Prostate Castration Resistant   | PFS | 6  | 1629            | 1.42  | 1.23 | 1.61  | 18.53% | F | 1.71 | 1.29 | 2.26  |
| Dong YW           | 2016 | NLR                      | Rectal                          | OS  | 6  | 857             | 13.41 | 4.9  | 36.72 | 4.30%  | R | 14   | 3.65 | 53.75 |
| Dong YW           | 2016 | NLR                      | Rectal                          | DFS | 3  | 403             | 4.37  | 2.33 | 8.19  | 2.31%  | R | 4.27 | 1.93 | 9.45  |
| Dong YW           | 2016 | NLR                      | Rectal                          | RFS | 3  | 433             | 3.64  | 1.88 | 7.05  | 1.10%  | R | 3.6  | 1.48 | 8.78  |
| Na N              | 2016 | NLR                      | Renal                           | PFS | 8  | 1115*           | 2.12  | 1.42 | 3.17  | 2.39%  | R | 2.07 | 1.47 | 2.92  |
| Shen M            | 2014 | Intratumoral Neutrophils | Renal                           | OS  | 2  | 206             | 2.69  | 1.89 | 3.83  | 0.74%  | R | 2.71 | 1.9  | 3.86  |
| Semeniuk-Wojtas A | 2018 | NLR                      | Renal (TKI)                     | PFS | 6  | NA <sup>†</sup> | 2.01  | 1.27 | 3.18  | 1.50%  | R | 1.98 | 1.31 | 3.01  |
| Boissier R        | 2017 | NLR                      | Renal Localised                 | RFS | 6  | 1962 (487/817)* | 1.63  | 1.15 | 2.29  | 2.42%  | R | 1.67 | 1.13 | 2.45  |
| Wei Y             | 2014 | NLR                      | Urinary                         | OS  | 13 | 3391            | 1.81  | 1.48 | 2.21  | 1.10%  | R | 1.83 | 1.48 | 2.26  |
| Liu G             | 2018 | NLR                      | Soft Tissue Sarcoma             | OS  | 13 | 2658*           | 1.59  | 1.28 | 1.97  | 1.90%  | R | 1.56 | 1.3  | 1.88  |
| Zeng Q            | 2018 | NLR                      | Multiple Myeloma                | OS  | 8  | 1886            | 1.73  | 1.23 | 2.44  | 1.75%  | R | 1.7  | 1.28 | 2.27  |

|              |             |            |                                           |           |           |             |       |       |       |        |   |      |      |      |
|--------------|-------------|------------|-------------------------------------------|-----------|-----------|-------------|-------|-------|-------|--------|---|------|------|------|
| Zeng Q       | 2018        | NLR        | Multiple Myeloma                          | PFS       | 4         | 1334        | 1.74  | 1.11  | 2.73  | 2.27%  | R | 1.78 | 1.07 | 2.96 |
| Xie X        | 2019        | NLR        | Nivolumab                                 | OS        | 6         | 442         | 2.58  | 1.92  | 3.48  | 1.03%  | F | 2.55 | 1.89 | 3.46 |
| Xie X        | 2019        | NLR        | Nivolumab                                 | PFS       | 8         | 744         | 1.54  | 1.19  | 1.99  | 2.63%  | R | 1.5  | 1.2  | 1.88 |
| Xie X        | 2019        | NLR        | Ipilimumab                                | OS        | 7         | 798         | 2.55  | 1.47  | 4.42  | 0.79%  | R | 2.53 | 1.58 | 4.05 |
| Zhang X      | 2018        | NLR        | Oesophageal                               | OS        | 26        | 8985        | 1.39  | 1.23  | 1.54  | 1.82%  | F | 1.36 | 1.30 | 1.44 |
| Zhang X      | 2018        | NLR        | Oesophageal                               | CSS       | 7         | 1885        | 1.38  | 1.07  | 1.69  | 2.86%  | R | 1.42 | 1.12 | 1.8  |
| Zhang X      | 2018        | NLR        | Oesophageal                               | RFS       | 3         | 677         | 1.51  | 1.11  | 1.91  | 6.41%  | R | 1.61 | 1.16 | 2.25 |
| Pirozzolo G  | 2019        | NLR        | Oesophageal (Neo+Surgery)                 | OS        | 3         | 1314        | 1.52  | 1     | 2.31  | 18.71% | R | 1.26 | 1.09 | 1.46 |
| Zhang X      | 2018        | NLR        | Oesophageal (No Surgery)                  | OS        | 4         | 1046        | 1.666 | 1.151 | 2.181 | 2.27%  | F | 1.70 | 1.45 | 2.01 |
| Zhang X      | 2018        | NLR        | Oesophageal Squamous Cell Carcinoma       | OS        | 18        | 7403        | 1.343 | 1.145 | 1.541 | 3.79%  | F | 1.39 | 1.30 | 1.49 |
| Zhang X      | 2018        | NLR        | Oesophageal                               | DFS       | 10        | 2837        | 1.41  | 1.12  | 1.69  | 13.22% | F | 1.24 | 1.14 | 1.34 |
| Zhang X      | 2018        | NLR        | Oesophageal                               | PFS       | 4         | 908         | 1.4   | 1.15  | 1.65  | 1.78%  | F | 1.43 | 1.18 | 1.73 |
| Duan J       | 2018        | NLR        | Breast (Surgical Resection)               | DFS       | 15        | 7820        | 1.54  | 1.28  | 1.87  | 2.56%  | R | 1.58 | 1.27 | 1.96 |
| Duan J       | 2018        | NLR        | Breast (Surgical Resection)               | OS        | 12        | 6233        | 2.45  | 1.69  | 3.54  | 0.81%  | R | 2.47 | 1.71 | 3.56 |
| Liu L        | 2019        | NLR        | Hepatocellular (Sorfenib)                 | OS        | 11        | 2324        | 1.76  | 1.44  | 2.15  | 1.72%  | R | 1.73 | 1.45 | 2.07 |
| <b>Lei Y</b> | <b>2019</b> | <b>NLR</b> | Glioma                                    | <b>OS</b> | <b>16</b> | <b>2275</b> | 1.43  | 1.27  | 1.62  | 6.10%  | R | 1.52 | 1.28 | 1.81 |
| Wang Z       | 2019        | NLR        | NSCLC (Targeted Therapy)                  | OS        | 5         | 422         | 1.92  | 1.14  | 3.24  | 3.17%  | R | 1.86 | 1.18 | 2.91 |
| Wang Z       | 2019        | NLR        | NSCLC (Targeted Therapy)                  | PFS       | 5         | 619         | 1.53  | 1.04  | 2.25  | 1.32%  | R | 1.51 | 1.06 | 2.13 |
| Cao D        | 2018        | NLR        | NSCLC (Nivoumab)                          | OS        | 8         | 666         | 1.75  | 1.33  | 2.3   | 1.73%  | R | 1.72 | 1.33 | 2.23 |
| Cao D        | 2018        | NLR        | NSCLC (Nivoumab)                          | PFS       | 10        | 900         | 1.44  | 1.18  | 1.77  | 4.75%  | R | 1.51 | 1.15 | 2    |
| Jiang T      | 2019        | NLR        | NSCLC (PD-1 inhibitor)                    | OS        | 13        | 2018        | 2.07  | 1.7   | 2.44  | 14.36% | F | 2.39 | 2.03 | 2.81 |
| Jiang T      | 2019        | NLR        | NSCLC (PD-1 inhibitor)                    | PFS       | 12        | 1614        | 1.59  | 1.36  | 1.82  | 2.48%  | F | 1.63 | 1.42 | 1.87 |
| Wang Z       | 2019        | NLR        | NSCLC (Systematic Therapy)                | OS        | 24        | 3694        | 1.63  | 1.43  | 1.84  | 13.71% | R | 1.87 | 1.53 | 2.29 |
| Wang Z       | 2019        | NLR        | NSCLC (Systematic Therapy)                | PFS       | 16        | 2679        | 1.45  | 1.28  | 1.66  | 3.39%  | R | 1.5  | 1.29 | 1.74 |
| Tham T       | 2018        | NLR        | Head and Neck                             | OS        | 26        | 6769        | 1.85  | 1.58  | 2.17  | 7.28%  | R | 1.72 | 1.51 | 1.96 |
| Yang Y       | 2018        | NLR        | Oral cavity                               | OS        | 9         | 2373        | 1.61  | 1.39  | 1.86  | 6.02%  | R | 1.71 | 1.42 | 2.06 |
| Xie X        | 2019        | NLR        | Melanoma (Immune checkpoint inhibitors)   | OS        | 9         | 1104        | 2.51  | 1.56  | 4.02  | 0.80%  | R | 2.49 | 1.72 | 3.61 |
| Su S         | 2019        | NLR        | Urothelial Carcinoma                      | OS        | 7         | 2554        | 1.29  | 1.03  | 1.61  | 2.30%  | R | 1.32 | 1.03 | 1.69 |
| Mori K       | 2020        | NLR        | UTUC (Nephroureterectomy)                 | CSS       | 12        | 6350        | 1.66  | 1.34  | 2.06  | 1.21%  | R | 1.64 | 1.34 | 2.02 |
| Mori K       | 2020        | NLR        | UTUC (Radical Cystectomy)                 | CSS       | 12        | 11158       | 1.2   | 1.11  | 1.29  | 7.23%  | R | 1.29 | 1.13 | 1.47 |
| Suh J        | 2019        | NLR        | Urothelial Carcinoma (Radical Cystectomy) | CSS       | 9         | 6974        | 1.35  | 1.18  | 1.55  | 12.50% | R | 1.53 | 1.18 | 1.97 |

|        |      |     |                                              |     |    |       |      |      |      |        |   |      |      |      |
|--------|------|-----|----------------------------------------------|-----|----|-------|------|------|------|--------|---|------|------|------|
| Suh J  | 2019 | NLR | Urothelial Carcinoma (Radical Cystectomy)    | OS  | 10 | 7049  | 1.18 | 1.08 | 1.3  | 12.70% | F | 1.04 | 1.02 | 1.06 |
| Suh J  | 2019 | NLR | Urothelial Carcinoma (Radical Cystectomy)    | PFS | 5  | 5935  | 1.12 | 1.03 | 1.22 | 5.78%  | F | 1.06 | 1.03 | 1.09 |
| Suh J  | 2019 | NLR | Bladder (Urothelial Transurethral Resection) | RFS | 5  | 1129  | 2.32 | 1.77 | 3.05 | 4.41%  | R | 2.22 | 1.81 | 2.74 |
| Hu G   | 2019 | NLR | Bladder                                      | OS  | 18 | 11945 | 1.23 | 1.13 | 1.33 | 10.77% | R | 1.37 | 1.18 | 1.6  |
| Feng J | 2020 | NLR | Thyroid                                      | DFS | 7  | 6343  | 1.79 | 0.97 | 3.33 | 3.30%  | R | 1.85 | 0.93 | 3.65 |
| Zhou Q | 2017 | NLR | Ovarian                                      | OS  | 16 | 4910  | 1.5  | 1.27 | 1.77 | 9.52%  | R | 1.65 | 1.29 | 2.11 |
| Cao J  | 2016 | NLR | Prostate                                     | OS  | 16 | 15298 | 1.4  | 1.25 | 1.55 | 3.15%  | F | 1.36 | 1.28 | 1.43 |
| Cao J  | 2016 | NLR | Prostate Localised                           | RFS | 7  | 11745 | 1.38 | 1.01 | 1.75 | 9.01%  | F | 1.26 | 1.13 | 1.40 |
| Wang Z | 2019 | NLR | NSCLC (Immunotherapy)                        | OS  | 8  | 1396  | 2.5  | 1.6  | 3.89 | 2.99%  | R | 2.43 | 1.64 | 3.59 |

N=number of component studies with in review, (NA) Not Applicable, (F) Fixed Effects, (R) Random Effects, (HR) Hazard ratio, (NLR) Neutrophil to lymphocyte ratio, (IN) Intratumoural neutrophils, (PN) Peritumoural neutrophils, (SN) Stromal Neutrophils, (OS) Overall Survival, (DFS) Disease-Free Survival, (PFS) Progression-Free Survival, (RFS) Recurrence-Free Survival, (CSS) Cancer Specific Survival, (VEGFR) Vascular Endothelial Growth Factor Receptor, (PC) Palliative Chemotherapy, (SBR) Surgical Bowel Resection, (NAC) Neoadjuvant Chemotherapy, (STS) Soft Tissue Sarcoma, (UTR) Urothelial Transurethral Resection, (SR) Surgical Resection, (GNT) Gastroenteropancreatic Neuroendocrine Tumors, (SCC) Squamous Cell Carcinoma, (ST) Systematic Therapy, (MT) Mixed Therapy, (TT) Targeted Therapy, (CLM) Colorectal Liver Metastasis, (NS) Non-surgical, (ICC) Intrahepatic Cholangiocarcinoma, (RFA) Radiofrequency Ablation, (TACE) Trans-Arterial Chemoembolization, (MPM) Malignant Pleural Mesothelioma, (NSCLC) Non-Small Cell Lung Cancer, (NHC), Neck and Head Cancer, (UTUC) Upper Tract Urothelial Carcinoma, (DCRT) Definitive Chemoradiotherapy, (CR) Castration Resistant, (TKI) Tyrosine Kinase Inhibitor.

\*All-cancers are defined as a grouping of cancer diagnosis unrelated to site, stage or treatment unless otherwise specified.

†review reported incomplete data on sample size.

## Appendix E: Heterogeneity and small study effects in included meta-analyses

| Author         | Year | Biomarker | Cancer site                          | meta-analysis metric | N   | Sample size (HNLR/LNLR) | Heterogeneity |           |                  |                     |                |                         | Small Study Effects     |                      |                  |
|----------------|------|-----------|--------------------------------------|----------------------|-----|-------------------------|---------------|-----------|------------------|---------------------|----------------|-------------------------|-------------------------|----------------------|------------------|
|                |      |           |                                      |                      |     |                         | Q             | Q p-value | Tau <sup>2</sup> | SE Tau <sup>2</sup> | I <sup>2</sup> | I <sup>2</sup> Upper CI | I <sup>2</sup> Lower CI | ARC-Thompson p-value | Largest > Random |
| Jiang T        | 2018 | NLR       | Advanced Cancer (Anti-VEGFR)         | OS                   | 14  | 2918                    | 105.08        | < 0.001   | 0.365            | 0.072               | 88%            | 81%                     | 92%                     | 0.016                | T                |
| Jiang T        | 2018 | NLR       | Advanced Cancer (Immunotherapy)      | PFS                  | 16  | 2318                    | 107.08        | < 0.001   | 0.305            | 0.051               | 86%            | 79%                     | 91%                     | 0.002                | F                |
| Mei Z          | 2017 | NLR       | Composite endpoints                  | OS                   | 65  | 18262*                  | 627.98        | < 0.001   | 0.236            | 0.016               | 90%            | 88%                     | 92%                     | < 0.001              | F                |
| Mei Z          | 2017 | NLR       | Composite endpoints                  | PFS                  | 23  | 5607                    | 192.17        | < 0.001   | 0.254            | 0.029               | 89%            | 84%                     | 92%                     | 0.001                | T                |
| Shen M         | 2014 | IN        | Composite endpoints                  | OS                   | 16  | 3335                    | 50.67         | < 0.001   | 0.318            | 0.057               | 70%            | 51%                     | 82%                     | 0.033                | F                |
| Shen M         | 2014 | IN        | Composite endpoints                  | CSS                  | 2   | 437                     | 0.05          | 0.824     | < 0.001          | 0.179               | 0%             | NA                      | NA                      | NA                   | F                |
| Paramanathan A | 2014 | NLR       | Composite endpoints                  | DFS                  | 20  | 13065                   | 654.72        | < 0.001   | 0.441            | 0.072               | 97%            | 96%                     | 98%                     | < 0.001              | F                |
| Shen M         | 2014 | PN        | Composite endpoints                  | OS                   | 2   | 535                     | 7.90          | 0.005     | 0.647            | 0.677               | 87%            | 51%                     | 97%                     | NA                   | F                |
| Shen M         | 2014 | SN        | Composite endpoints                  | OS                   | 2   | 535                     | 2.31          | 0.129     | 0.206            | 0.106               | 57%            | 0%                      | 90%                     | NA                   | F                |
| Dolan R        | 2017 | NLR       | Composite endpoints Operable         | OS                   | 120 | 68603 (18667/49936)     | 7563.80       | < 0.001   | 0.269            | 0.015               | 98%            | 98%                     | 99%                     | < 0.001              | F                |
| Dolan R        | 2017 | NLR       | Composite endpoints Operable         | CSS                  | 41  | 21175 (4617/16558)      | 201.35        | < 0.001   | 0.262            | 0.025               | 80%            | 74%                     | 85%                     | < 0.001              | F                |
| Tang H         | 2017 | NLR       | Biliary Tract                        | OS                   | 14  | 3217 (1295/1710)*       | 15.14         | 0.298     | 0.095            | 0.016               | 14%            | 0%                      | 53%                     | 0.154                | F                |
| Tang H         | 2017 | NLR       | Biliary Tract                        | RFS                  | 5   | 637 (303/244)           | 6.85          | 0.144     | 0.080            | 0.027               | 42%            | 0%                      | 78%                     | 0.093                | F                |
| Hu G           | 2019 | NLR       | Bladder                              | OS                   | 18  | 11945                   | 76.43         | < 0.001   | 0.258            | 0.034               | 78%            | 65%                     | 86%                     | < 0.001              | F                |
| Wu S           | 2018 | NLR       | Bladder                              | RFS                  | 9   | 8075                    | 27.70         | 0.001     | 0.189            | 0.029               | 71%            | 43%                     | 85%                     | 0.005                | F                |
| Wu S           | 2018 | NLR       | Bladder (Metastasis)                 | OS                   | 4   | 862                     | 0.49          | 0.922     | < 0.001          | 0.024               | 0%             | 0%                      | 6%                      | 0.976                | T                |
| Hu G           | 2019 | NLR       | Bladder (Radical Cystectomy and NAC) | OS                   | 4   | 447                     | 3.70          | 0.296     | 0.048            | 0.006               | 19%            | 0%                      | 88%                     | 0.475                | F                |
| Hu G           | 2019 | NLR       | Bladder (Radical Cystectomy)         | OS                   | 8   | 10363                   | 25.63         | 0.001     | 0.075            | 0.006               | 73%            | 44%                     | 87%                     | 0.003                | F                |
| Suh J          | 2019 | NLR       | Bladder (UTR)                        | PFS                  | 4   | 1040                    | 1.71          | 0.635     | < 0.001          | 0.210               | 0%             | 0%                      | 73%                     | 0.717                | F                |
| Suh J          | 2019 | NLR       | Bladder (UTR)                        | RFS                  | 5   | 1129                    | 5.03          | 0.284     | 0.002            | 0.046               | 20%            | 0%                      | 66%                     | 0.180                | F                |
| Li X           | 2017 | NLR       | Bladder and Upper Urinary            | PFS                  | 19  | 8182                    | 32.66         | 0.018     | 0.197            | 0.033               | 45%            | 6%                      | 68%                     | < 0.001              | F                |
| Li X           | 2017 | NLR       | Bladder and Upper Urinary            | CSS                  | 17  | 7645                    | 46.40         | < 0.001   | 0.219            | 0.033               | 66%            | 42%                     | 79%                     | 0.001                | F                |
| Ethier JL      | 2017 | NLR       | Breast                               | OS                   | 13  | 8015                    | 26.42         | 0.009     | 0.316            | 0.086               | 55%            | 15%                     | 76%                     | 0.001                | F                |
| Liu X          | 2017 | NLR       | Breast                               | DFS                  | 12  | 5523                    | 46.52         | < 0.001   | 0.281            | 0.067               | 76%            | 59%                     | 86%                     | < 0.001              | F                |

|             |      |     |                                            |     |    |               |       |         |         |       |     |     |     |       |   |
|-------------|------|-----|--------------------------------------------|-----|----|---------------|-------|---------|---------|-------|-----|-----|-----|-------|---|
| Liu X       | 2017 | NLR | Breast                                     | CSS | 4  | 4186          | 13.25 | 0.004   | 0.529   | 0.343 | 77% | 38% | 92% | 0.071 | F |
| Chen J      | 2018 | NLR | Breast (Metastasis)                        | OS  | 2  | 858           | 0.01  | 0.923   | < 0.001 | 0.141 | 0%  | NA  | NA  | NA    | F |
| Chen J      | 2018 | NLR | Breast (Metastasis)                        | DFS | 3  | 1003          | 0.05  | 0.976   | < 0.001 | 0.090 | 0%  | 0%  | 0%  | 0.862 | T |
| Chen J      | 2018 | NLR | Breast (No Metastasis)                     | OS  | 2  | 488           | 13.14 | < 0.001 | 0.947   | 1.373 | 92% | 74% | 98% | NA    | F |
| Chen J      | 2018 | NLR | Breast (No Metastasis)                     | DFS | 2  | 466           | 0.60  | 0.439   | < 0.001 | 0.260 | 0%  | NA  | NA  | NA    | F |
| Duan J      | 2018 | NLR | Breast (SR)                                | DFS | 15 | 7820          | 91.73 | < 0.001 | 0.322   | 0.064 | 85% | 76% | 90% | 0.046 | T |
| Duan J      | 2018 | NLR | Breast (SR)                                | OS  | 12 | 6233          | 25.37 | 0.008   | 0.446   | 0.167 | 57% | 17% | 77% | 0.219 | T |
| Duan J      | 2018 | NLR | Breast (SR)                                | RFS | 2  | 319           | 0.04  | 0.839   | < 0.001 | 0.509 | 0%  | NA  | NA  | NA    | T |
| Guo W       | 2019 | NLR | Breast (Triple Negative and Her2 Positive) | DFS | 27 | 11369         | 52.37 | 0.002   | 0.200   | 0.026 | 50% | 23% | 68% | 0.015 | F |
| Guo W       | 2019 | NLR | Breast (Triple Negative and Her2 Positive) | OS  | 28 | 14128         | 97.63 | < 0.001 | 0.353   | 0.057 | 72% | 60% | 81% | 0.005 | F |
| Liu X       | 2017 | NLR | Breast (Triple-negative)                   | OS  | 4  | 608           | 2.48  | 0.479   | < 0.001 | 0.185 | 0%  | 0%  | 81% | 0.262 | T |
| Liu X       | 2017 | NLR | Breast (Triple-negative)                   | DFS | 4  | 461           | 1.83  | 0.609   | < 0.001 | 0.310 | 0%  | 0%  | 75% | 0.357 | F |
| Wu J        | 2017 | NLR | Cervical                                   | OS  | 12 | 3661          | 26.42 | 0.006   | 0.236   | 0.044 | 58% | 21% | 78% | 0.016 | F |
| Wu J        | 2017 | NLR | Cervical                                   | PFS | 10 | 2452          | 93.66 | < 0.001 | 0.364   | 0.081 | 90% | 84% | 94% | 0.192 | F |
| Zhang J     | 2017 | NLR | Colorectal                                 | DFS | 5  | 2178          | 5.63  | 0.229   | 0.217   | 0.092 | 29% | 0%  | 72% | 0.253 | F |
| Zheng DC    | 2016 | NLR | Colorectal                                 | OS  | 21 | 7927          | 58.60 | < 0.001 | 0.322   | 0.059 | 66% | 46% | 78% | 0.010 | F |
| Zheng DC    | 2016 | NLR | Colorectal                                 | PFS | 14 | 3662          | 27.99 | 0.009   | 0.341   | 0.086 | 54% | 15% | 75% | 0.041 | T |
| Malietzis G | 2014 | NLR | Colorectal (PC)                            | DFS | 3  | 515 (148/367) | 0.36  | 0.834   | < 0.001 | 0.036 | 0%  | 0%  | 43% | 0.686 | F |
| Li H        | 2019 | NLR | Colorectal (SR)                            | DFS | 9  | 4237          | 16.81 | 0.032   | 0.276   | 0.078 | 52% | 0%  | 78% | 0.027 | F |
| Li H        | 2019 | NLR | Colorectal (SR)                            | OS  | 11 | 4832          | 21.98 | 0.015   | 0.238   | 0.048 | 54% | 10% | 77% | 0.034 | F |
| Li H        | 2019 | NLR | Colorectal (SR)                            | RFS | 3  | 643           | 1.72  | 0.424   | < 0.001 | 0.081 | 0%  | 0%  | 88% | 0.638 | F |
| Tang H      | 2016 | NLR | CLM                                        | OS  | 7  | 1491          | 4.16  | 0.655   | < 0.001 | 0.028 | 0%  | 0%  | 58% | 0.246 | T |
| Tang H      | 2016 | NLR | CLM                                        | RFS | 6  | 1093          | 9.17  | 0.102   | 0.234   | 0.078 | 45% | 0%  | 78% | 0.455 | T |
| Tang H      | 2016 | NLR | CLM (Non-surgical)                         | OS  | 2  | 182           | 0.14  | 0.710   | < 0.001 | 0.233 | 0%  | NA  | NA  | NA    | F |
| Tang H      | 2016 | NLR | CLM (Non-surgical)                         | RFS | 2  | 190           | 1.43  | 0.232   | 0.250   | 0.296 | 30% | NA  | NA  | NA    | F |
| Tang H      | 2016 | NLR | CLM (SR)                                   | OS  | 5  | 1309          | 2.02  | 0.731   | < 0.001 | 0.029 | 0%  | 0%  | 59% | 0.713 | T |
| Tang H      | 2016 | NLR | CLM (SR)                                   | RFS | 4  | 903           | 7.29  | 0.063   | 0.259   | 0.099 | 59% | 0%  | 86% | 0.576 | T |
| Ni L        | 2020 | NLR | Endometrial                                | OS  | 9  | 2942          | 4.29  | 0.830   | < 0.001 | 0.053 | 0%  | 0%  | 34% | 0.261 | F |



|           |      |     |                               |     |    |                       |        |         |         |       |     |     |     |         |   |
|-----------|------|-----|-------------------------------|-----|----|-----------------------|--------|---------|---------|-------|-----|-----|-----|---------|---|
| Ni L      | 2020 | NLR | Endometrial                   | PFS | 5  | 1798                  | 5.95   | 0.203   | 0.187   | 0.104 | 33% | 0%  | 74% | 0.284   | F |
| Sun J     | 2016 | NLR | Gastric                       | OS  | 19 | 5431                  | 38.17  | 0.004   | 0.155   | 0.020 | 53% | 21% | 72% | 0.105   | F |
| Sun J     | 2016 | NLR | Gastric                       | DFS | 7  | 976                   | 3.23   | 0.780   | < 0.001 | 0.029 | 0%  | 0%  | 46% | 0.887   | T |
| Shen M    | 2014 | IN  | Gastric                       | OS  | 2  | 388                   | 6.42   | 0.011   | 0.584   | 0.571 | 84% | 36% | 96% | NA      | T |
| Zhang X   | 2014 | NLR | Gastric                       | PFS | 2  | 314                   | 1.19   | 0.275   | 0.129   | 0.146 | 16% | NA  | NA  | NA      | F |
| Szor D    | 2018 | NLR | Gastric (SR)                  | OS  | 7  | 3223<br>(1018/2205)   | 39.86  | < 0.001 | 0.542   | 0.215 | 85% | 71% | 92% | 0.737   | T |
| Mellor K  | 2018 | NLR | Gastric (SR)                  | DFS | 3  | 820 (156/664)         | 10.03  | 0.007   | 0.657   | 0.554 | 80% | 37% | 94% | 0.197   | T |
| Zhou Y    | 2018 | NLR | GNT                           | OS  | 4  | 422                   | 2.01   | 0.571   | < 0.001 | 0.182 | 0%  | 0%  | 77% | 0.299   | T |
| Zhou Y    | 2018 | NLR | GNT                           | RFS | 3  | 300                   | 1.45   | 0.484   | 0.024   | 0.273 | 0%  | 0%  | 86% | 0.466   | F |
| Luo XF    | 2018 | NLR | Gastrointestinal<br>Stromal   | OS  | 2  | 278                   | 6.02   | 0.014   | 0.682   | 0.789 | 83% | 31% | 96% | NA      | F |
| Lei Y     | 2019 | NLR | Glioma                        | OS  | 16 | 2275                  | 88.11  | < 0.001 | 0.283   | 0.046 | 83% | 74% | 89% | < 0.001 | F |
| Ethier JL | 2017 | NLR | Gynecologic                   | OS  | 27 | 10530                 | 88.64  | < 0.001 | 0.312   | 0.047 | 71% | 57% | 80% | < 0.001 | F |
| Yu Y      | 2018 | NLR | Head and Neck                 | RFS | 4  | 658                   | 9.57   | 0.023   | 0.307   | 0.131 | 69% | 9%  | 89% | 0.182   | T |
| Tham T    | 2018 | NLR | Head and Neck                 | OS  | 26 | 6769                  | 36.40  | 0.066   | 0.172   | 0.028 | 31% | 0%  | 58% | < 0.001 | F |
| Tham T    | 2018 | NLR | Head and neck                 | PFS | 6  | 2173                  | 10.92  | 0.053   | 0.221   | 0.059 | 54% | 0%  | 82% | 0.276   | T |
| Tham T    | 2018 | NLR | Head and neck                 | DFS | 11 | 1692                  | 15.52  | 0.114   | 0.237   | 0.069 | 36% | 0%  | 68% | 0.032   | F |
| Shen M    | 2014 | IN  | Head and Neck                 | OS  | 3  | 220                   | 1.88   | 0.391   | 0.025   | 0.150 | 0%  | 0%  | 89% | 0.419   | T |
| Tham T    | 2018 | NLR | Head and Neck (No<br>Surgery) | OS  | 9  | 3285                  | 10.40  | 0.238   | 0.146   | 0.045 | 23% | 0%  | 64% | 0.052   | T |
| Yang L    | 2019 | NLR | Head and Neck (SCC)           | CSS | 5  | 1854                  | 7.53   | 0.110   | 0.001   | 0.023 | 47% | 0%  | 81% | 0.124   | F |
| Yang L    | 2019 | NLR | Head and Neck (SCC)           | PFS | 4  | 461                   | 6.15   | 0.104   | 0.228   | 0.087 | 51% | 0%  | 84% | 0.177   | T |
| Cho J     | 2018 | NLR | Head and Neck (SCC)           | OS  | 24 | 5650                  | 44.01  | 0.005   | 0.259   | 0.044 | 48% | 16% | 68% | 0.001   | F |
| Cho J     | 2018 | NLR | Head and Neck (SCC)           | DFS | 12 | 2079                  | 35.54  | < 0.001 | 0.387   | 0.108 | 69% | 44% | 83% | 0.003   | F |
| Tham T    | 2018 | NLR | Head and Neck (SR)            | OS  | 3  | 707                   | 4.88   | 0.087   | 0.277   | 0.136 | 59% | 0%  | 88% | 0.272   | F |
| Min GT    | 2018 | NLR | Hepatocellular                | OS  | 44 | 10491<br>(2594/5312)* | 224.97 | < 0.001 | 0.429   | 0.053 | 81% | 75% | 85% | < 0.001 | F |
| Min GT    | 2018 | NLR | Hepatocellular                | DFS | 17 | 3881<br>(919/1729)*   | 81.01  | < 0.001 | 0.447   | 0.102 | 80% | 69% | 87% | < 0.001 | F |
| Min GT    | 2018 | NLR | Hepatocellular                | RFS | 16 | 5037<br>(1470/3188)*  | 93.69  | < 0.001 | 0.374   | 0.074 | 84% | 75% | 90% | 0.001   | F |
| Xiao WK   | 2014 | NLR | Hepatocellular (MT)           | OS  | 3  | 522 (213/309)         | 1.97   | 0.374   | 0.084   | 0.079 | 0%  | 0%  | 89% | 0.394   | F |
| Xiao WK   | 2014 | NLR | Hepatocellular (RFA)          | OS  | 2  | 370 (172/198)         | 0.94   | 0.333   | < 0.001 | 0.055 | 0%  | NA  | NA  | NA      | T |
| Xiao WK   | 2014 | NLR | Hepatocellular (RFA)          | DFS | 2  | 1054 (264/790)        | 0.94   | 0.333   | < 0.001 | 0.055 | 0%  | NA  | NA  | NA      | T |
| Liu L     | 2019 | NLR | Hepatocellular<br>(Sorfenib)  | OS  | 11 | 2324                  | 30.93  | 0.001   | 0.210   | 0.039 | 68% | 39% | 83% | 0.001   | T |

|              |      |     |                                                    |     |    |                      |        |         |         |       |     |     |     |         |   |
|--------------|------|-----|----------------------------------------------------|-----|----|----------------------|--------|---------|---------|-------|-----|-----|-----|---------|---|
| Wang Y       | 2018 | NLR | Hepatocellular (SR)                                | RFS | 10 | 3404<br>(940/2298)*  | 11.61  | 0.236   | 0.145   | 0.032 | 22% | 0%  | 62% | 0.079   | F |
| Wang Y       | 2018 | NLR | Hepatocellular (SR)                                | OS  | 13 | 4225<br>(1336/2723)* | 17.35  | 0.137   | 0.134   | 0.024 | 31% | 0%  | 64% | 0.010   | F |
| Wang Y       | 2018 | NLR | Hepatocellular (SR)                                | DFS | 7  | 1272 (581/691)       | 8.51   | 0.203   | 0.001   | 0.011 | 30% | 0%  | 70% | 0.052   | F |
| Li S         | 2020 | NLR | Hepatocellular<br>(TACE)                           | OS  | 16 | 4023                 | 28.47  | 0.019   | 0.142   | 0.019 | 47% | 6%  | 71% | 0.031   | F |
| Xu ZG        | 2018 | NLR | Hepatocellular<br>(Transplant)                     | OS  | 8  | 1230 (352/878)       | 48.51  | < 0.001 | 0.564   | 0.222 | 86% | 74% | 92% | 0.008   | F |
| Xu ZG        | 2018 | NLR | Hepatocellular<br>(Transplant)                     | RFS | 4  | 83 (251/372)*        | 9.01   | 0.029   | 0.481   | 0.309 | 67% | 3%  | 89% | 0.262   | F |
| Shen M       | 2014 | IN  | Hepatocellular and<br>ICC                          | OS  | 4  | 846                  | 7.02   | 0.071   | 0.234   | 0.077 | 57% | 0%  | 86% | 0.742   | T |
| Yang L       | 2019 | NLR | Hypopharynx                                        | OS  | 3  | 310                  | 0.95   | 0.622   | < 0.001 | 0.087 | 0%  | 0%  | 78% | 0.589   | T |
| Jiang T      | 2018 | NLR | Immunotherapy<br>(Advanced Cancer)                 | OS  | 23 | 4355                 | 118.18 | < 0.001 | 0.298   | 0.043 | 81% | 73% | 87% | 0.009   | T |
| Tan Q        | 2018 | NLR | Immunotherapy<br>(Immune checkpoint<br>inhibitors) | OS  | 18 | 1863                 | 127.64 | < 0.001 | 0.448   | 0.106 | 87% | 80% | 91% | < 0.001 | F |
| Tan Q        | 2018 | NLR | Immunotherapy<br>(Immune checkpoint<br>inhibitors) | PFS | 11 | 1274                 | 67.67  | < 0.001 | 0.303   | 0.066 | 85% | 75% | 91% | < 0.001 | F |
| Xie X        | 2019 | NLR | Ipilimumuab                                        | OS  | 7  | 798                  | 136.13 | < 0.001 | 0.593   | 0.232 | 96% | 93% | 97% | 0.046   | F |
| Xie X        | 2019 | NLR | Ipilimumuab                                        | PFS | 3  | 370                  | 6.67   | 0.036   | 0.328   | 0.161 | 70% | 0%  | 91% | 0.461   | F |
| Mu S         | 2018 | NLR | Large B                                            | OS  | 10 | NA <sup>†</sup>      | 31.24  | < 0.001 | 0.584   | 0.229 | 71% | 45% | 85% | 0.131   | F |
| Mu S         | 2018 | NLR | Large B                                            | PFS | 9  | NA <sup>†</sup>      | 25.97  | 0.001   | 0.473   | 0.161 | 69% | 38% | 85% | 0.085   | F |
| Yang L       | 2019 | NLR | Larynx                                             | DFS | 3  | 1260                 | 1.84   | 0.399   | 0.022   | 0.036 | 0%  | 0%  | 89% | 0.415   | F |
| Mascarella M | 2018 | NLR | Larynx                                             | OS  | 6  | 1017                 | 5.45   | 0.364   | 0.111   | 0.046 | 8%  | 0%  | 77% | 0.268   | F |
| Zhao QT      | 2015 | NLR | Lung (both)                                        | OS  | 21 | 6942                 | 102.04 | < 0.001 | 0.289   | 0.039 | 80% | 71% | 87% | 0.001   | T |
| Zhao QT      | 2015 | NLR | Lung (both)                                        | PFS | 9  | 1748                 | 39.37  | < 0.001 | 0.408   | 0.105 | 80% | 62% | 89% | 0.205   | T |
| Yu Y         | 2017 | NLR | Lung (Surgery)                                     | OS  | 7  | 2877                 | 36.28  | < 0.001 | 0.198   | 0.034 | 83% | 67% | 92% | 0.017   | T |
| Zhan H       | 2018 | NLR | Melanoma                                           | OS  | 10 | 4437                 | 97.28  | < 0.001 | 0.325   | 0.065 | 91% | 85% | 94% | 0.013   | F |
| Ding Y       | 2018 | NLR | Melanoma                                           | PFS | 6  | 752                  | 3.94   | 0.558   | 0.090   | 0.048 | 0%  | 0%  | 68% | 0.241   | F |
| Xie X        | 2019 | NLR | Melanoma (Immune<br>checkpoint inhibitors)         | OS  | 9  | 1104                 | 151.41 | < 0.001 | 0.519   | 0.162 | 95% | 92% | 97% | 0.050   | F |
| Xie X        | 2019 | NLR | Melanoma (Immune<br>checkpoint inhibitors)         | PFS | 4  | 467                  | 4.65   | 0.199   | 0.131   | 0.036 | 35% | 0%  | 78% | 0.716   | F |
| Chen         | 2017 | NLR | MPM                                                | OS  | 11 | 1378                 | 39.67  | < 0.001 | 0.348   | 0.082 | 77% | 58% | 88% | 0.719   | F |

|               |      |     |                                         |     |    |      |        |         |         |       |     |     |     |             |   |
|---------------|------|-----|-----------------------------------------|-----|----|------|--------|---------|---------|-------|-----|-----|-----|-------------|---|
| Zeng Q        | 2018 | NLR | Multiple Myeloma                        | OS  | 8  | 1886 | 36.22  | < 0.001 | 0.301   | 0.085 | 81% | 63% | 90% | 0.286       | T |
| Zeng Q        | 2018 | NLR | Multiple Myeloma                        | PFS | 4  | 1334 | 24.94  | < 0.001 | 0.474   | 0.221 | 88% | 72% | 95% | 0.039       | T |
| Yang S        | 2019 | NLR | Nasopharyngeal                          | OS  | 10 | 7031 | 9.90   | 0.358   | 0.085   | 0.019 | 9%  | 0%  | 66% | 0.171       | F |
| Yin J         | 2017 | NLR | Nasopharyngeal                          | PFS | 5  | 4130 | 3.67   | 0.452   | 0.052   | 0.020 | 0%  | 0%  | 77% | 0.183       | F |
| Su L          | 2017 | NLR | Nasopharyngeal                          | CSS | 3  | 2320 | 1.47   | 0.480   | 0.063   | 0.040 | 0%  | 0%  | 86% | 0.487       | F |
| Li X          | 2018 | NLR | NAC                                     | OS  | 18 | 3282 | 74.20  | < 0.001 | 0.332   | 0.062 | 77% | 64% | 85% | < 0.001     | T |
| Li X          | 2018 | NLR | NAC                                     | RFS | 7  | 775  | 9.43   | 0.151   | 0.251   | 0.102 | 36% | 0%  | 73% | 0.104       | T |
| Li X          | 2018 | NLR | NAC                                     | CSS | 5  | 971  | 21.41  | < 0.001 | 0.409   | 0.198 | 81% | 57% | 92% | 0.126       | T |
| Xie X         | 2019 | NLR | Nivolumab                               | OS  | 6  | 442  | 7.98   | 0.158   | 0.287   | 0.156 | 37% | 0%  | 75% | 0.345       | F |
| Xie X         | 2019 | NLR | Nivolumab                               | PFS | 8  | 744  | 52.44  | < 0.001 | 0.261   | 0.055 | 87% | 76% | 93% | 0.068       | F |
| Vartolomei MD | 2018 | NLR | Non muscle Invasive Bladder             | RFS | 6  | 2298 | 14.03  | 0.015   | 0.242   | 0.073 | 64% | 14% | 85% | 0.282       | F |
| Vartolomei MD | 2018 | NLR | Non muscle Invasive Bladder             | PFS | 6  | 2298 | 4.30   | 0.506   | 0.172   | 0.118 | 0%  | 0%  | 71% | 0.149       | F |
| Vartolomei MD | 2018 | NLR | Non muscle Invasive Bladder (High Risk) | RFS | 4  | 599  | 7.12   | 0.068   | 0.451   | 0.303 | 58% | 0%  | 86% | 0.163       | F |
| Vartolomei MD | 2018 | NLR | Non muscle Invasive Bladder (High Risk) | PFS | 3  | 510  | 1.77   | 0.413   | < 0.001 | 0.305 | 0%  | 0%  | 88% | 0.751       | T |
| Lu Y          | 2020 | NLR | NSCLC                                   | OS  | 21 | 5141 | 54.83  | < 0.001 | 0.207   | 0.022 | 64% | 42% | 77% | 0.002       | F |
| Gu XB         | 2015 | NLR | NSCLC                                   | PFS | 10 | 2623 | 48.87  | < 0.001 | 0.251   | 0.050 | 82% | 67% | 90% | < 0.001     | F |
| Shen M        | 2014 | IN  | NSCLC                                   | OS  | 2  | 967  | 0.00   | 0.960   | < 0.001 | 0.021 | 0%  | NA  | NA  | NA          | T |
| Wang Z        | 2019 | NLR | NSCLC (Chemotherapy)                    | OS  | 9  | 1276 | 53.18  | < 0.001 | 0.441   | 0.129 | 85% | 73% | 92% | 0.049       | F |
| Wang Z        | 2019 | NLR | NSCLC (Chemotherapy)                    | PFS | 5  | 875  | 5.44   | 0.245   | 0.150   | 0.049 | 26% | 0%  | 71% | 0.146       | F |
| Xie X         | 2019 | NLR | NSCLC (Immune Checkpoint Inhibitors)    | PFS | 6  | 609  | 17.62  | 0.003   | 0.208   | 0.048 | 72% | 34% | 88% | 0.018       | T |
| Wang Z        | 2019 | NLR | NSCLC (Immunotherapy)                   | OS  | 8  | 1396 | 34.59  | < 0.001 | 0.45    | 0.17  | 80% | 61% | 90% | 0.001185886 | F |
| Cao D         | 2018 | NLR | NSCLC (Nivoumab)                        | OS  | 8  | 666  | 55.59  | < 0.001 | 0.288   | 0.069 | 87% | 77% | 93% | 0.015       | T |
| Cao D         | 2018 | NLR | NSCLC (Nivoumab)                        | PFS | 10 | 900  | 64.86  | < 0.001 | 0.401   | 0.093 | 86% | 76% | 92% | 0.008       | F |
| Jiang T       | 2019 | NLR | NSCLC (PD-1 inhibitor)                  | OS  | 13 | 2018 | 15.38  | 0.222   | 0.202   | 0.056 | 22% | 0%  | 59% | 0.006       | F |
| Jiang T       | 2019 | NLR | NSCLC (PD-1 inhibitor)                  | PFS | 12 | 1614 | 3.53   | 0.982   | < 0.001 | 0.022 | 0%  | 0%  | 0%  | 0.742       | T |
| Wang Z        | 2019 | NLR | NSCLC (ST)                              | OS  | 24 | 3694 | 134.01 | < 0.001 | 0.413   | 0.072 | 83% | 75% | 88% | < 0.001     | F |
| Wang Z        | 2019 | NLR | NSCLC (ST)                              | PFS | 16 | 2679 | 66.69  | < 0.001 | 0.229   | 0.032 | 78% | 64% | 86% | < 0.001     | F |
| Wang Z        | 2019 | NLR | NSCLC (TT)                              | OS  | 5  | 422  | 17.59  | 0.001   | 0.402   | 0.185 | 77% | 45% | 91% | 0.025       | F |

|             |      |     |                                  |     |    |                 |        |         |         |       |     |     |     |         |   |
|-------------|------|-----|----------------------------------|-----|----|-----------------|--------|---------|---------|-------|-----|-----|-----|---------|---|
| Wang Z      | 2019 | NLR | NSCLC (TT)                       | PFS | 5  | 619             | 16.06  | 0.003   | 0.311   | 0.110 | 75% | 39% | 90% | 0.034   | F |
| Zhang X     | 2018 | NLR | Oesophageal                      | OS  | 26 | 8985            | 97.15  | < 0.001 | 0.267   | 0.031 | 74% | 62% | 82% | 0.039   | T |
| Zhang X     | 2018 | NLR | Oesophageal                      | CSS | 7  | 1885            | 14.46  | 0.025   | 0.235   | 0.058 | 59% | 4%  | 82% | 0.877   | T |
| Zhang X     | 2018 | NLR | Oesophageal                      | RFS | 3  | 677             | 3.36   | 0.187   | 0.179   | 0.089 | 40% | 0%  | 82% | 0.675   | F |
| Zhang X     | 2018 | NLR | Oesophageal                      | DFS | 10 | 2837            | 65.99  | < 0.001 | 0.394   | 0.093 | 86% | 77% | 92% | 0.049   | F |
| Zhang X     | 2018 | NLR | Oesophageal                      | PFS | 4  | 908             | 2.45   | 0.484   | 0.058   | 0.034 | 0%  | 0%  | 81% | 0.568   | T |
| Pirozzolo G | 2019 | NLR | Oesophageal (DCRT)               | OS  | 3  | 1563            | 1.15   | 0.562   | < 0.001 | 0.012 | 0%  | 0%  | 82% | 0.513   | F |
| Pirozzolo G | 2019 | NLR | Oesophageal (Neo+Surgery)        | OS  | 3  | 1314            | 1.41   | 0.493   | 0.001   | 0.016 | 0%  | 0%  | 85% | 0.451   | F |
| Zhang X     | 2018 | NLR | Oesophageal (No Surgery)         | OS  | 4  | 1046            | 6.75   | 0.080   | 0.220   | 0.075 | 56% | 0%  | 85% | 0.549   | T |
| Zhang X     | 2018 | NLR | Oesophageal (Surgery)            | OS  | 22 | 7119            | 82.49  | < 0.001 | 0.289   | 0.039 | 76% | 63% | 84% | 0.076   | T |
| Pirozzolo G | 2019 | NLR | Oesophageal (Surgery+/-Chemo)    | OS  | 14 | 3580            | 42.61  | < 0.001 | 0.330   | 0.064 | 69% | 47% | 82% | 0.225   | F |
| Zhang X     | 2018 | NLR | Oesophageal SCC                  | OS  | 18 | 7403            | 56.55  | < 0.001 | 0.217   | 0.026 | 68% | 49% | 80% | 0.331   | T |
| Yang Y      | 2018 | NLR | Oral cavity                      | OS  | 9  | 2373            | 13.01  | 0.112   | 0.172   | 0.038 | 38% | 0%  | 72% | 0.747   | T |
| Yang Y      | 2018 | NLR | Oral cavity                      | DFS | 10 | 1920            | 8.51   | 0.484   | 0.002   | 0.034 | 0%  | 0%  | 60% | 0.045   | T |
| Wang Y      | 2018 | NLR | Oral SCC                         | OS  | 6  | 1360            | 4.38   | 0.496   | 0.021   | 0.040 | 0%  | 0%  | 71% | 0.327   | F |
| Wang Y      | 2018 | NLR | Oral SCC                         | DFS | 6  | 1161            | 3.46   | 0.629   | 0.001   | 0.083 | 0%  | 0%  | 63% | 0.203   | F |
| Yang L      | 2019 | NLR | Oropharynx                       | DFS | 3  | NA <sup>+</sup> | 0.39   | 0.822   | < 0.001 | 0.078 | 0%  | 0%  | 47% | 0.670   | T |
| Zhou Q      | 2017 | NLR | Ovarian                          | PFS | 12 | 3884            | 75.78  | < 0.001 | 0.330   | 0.065 | 85% | 76% | 91% | 0.004   | F |
| Zhou Q      | 2017 | NLR | Ovarian                          | OS  | 16 | 4910            | 75.30  | < 0.001 | 0.412   | 0.088 | 80% | 68% | 87% | < 0.001 | F |
| Zhou Y      | 2018 | NLR | Pancreatic                       | OS  | 43 | NA <sup>+</sup> | 232.24 | < 0.001 | 0.345   | 0.038 | 82% | 76% | 86% | < 0.001 | F |
| Zhou Y      | 2018 | NLR | Pancreatic                       | DFS | 8  | 1236            | 21.33  | 0.003   | 0.417   | 0.143 | 67% | 31% | 84% | 0.370   | F |
| Yang JJ     | 2015 | NLR | Pancreatic                       | CSS | 3  | 845 (387/458)   | 8.92   | 0.012   | 0.321   | 0.139 | 78% | 27% | 93% | 0.424   | F |
| Mowbray N   | 2018 | NLR | Pancreatic (SR)                  | OS  | 8  | 1519            | 10.15  | 0.180   | 0.001   | 0.023 | 31% | 0%  | 69% | 0.054   | F |
| Zhou Y      | 2018 | NLR | Pancreatic Neuroendocrine Tumour | OS  | 2  | 223             | 0.24   | 0.623   | < 0.001 | 0.459 | 0%  | NA  | NA  | NA      | F |
| Zhou Y      | 2018 | NLR | Pancreatic Neuroendocrine Tumour | RFS | 2  | 223             | 0.09   | 0.766   | < 0.001 | 0.650 | 0%  | NA  | NA  | NA      | F |
| Guo J       | 2018 | NLR | Prostate                         | PFS | 7  | 1088            | 8.22   | 0.222   | 0.196   | 0.084 | 27% | 0%  | 68% | 0.178   | T |
| Cao J       | 2016 | NLR | Prostate                         | OS  | 16 | 15298           | 50.93  | < 0.001 | 0.174   | 0.019 | 69% | 48% | 81% | 0.002   | F |
| Guo J       | 2018 | NLR | Prostate (Metastatic)            | OS  | 8  | 2152            | 13.40  | 0.099   | 0.176   | 0.040 | 40% | 0%  | 73% | 0.023   | F |
| Cao J       | 2016 | NLR | Prostate CR                      | PFS | 6  | 1629            | 9.52   | 0.090   | 0.243   | 0.072 | 47% | 0%  | 79% | 0.163   | F |
| Yin X       | 2016 | NLR | Prostate CR                      | OS  | 9  | 2765            | 8.56   | 0.380   | < 0.001 | 0.009 | 7%  | 0%  | 67% | 0.340   | F |

|                   |      |     |                            |     |    |                 |       |         |         |       |     |     |     |             |   |
|-------------------|------|-----|----------------------------|-----|----|-----------------|-------|---------|---------|-------|-----|-----|-----|-------------|---|
| Yin X             | 2016 | NLR | Prostate Localised         | OS  | 2  | 8765            | 4.24  | 0.039   | 0.406   | 0.305 | 76% | 0%  | 95% | NA          | F |
| Guan Y            | 2020 | NLR | Prostate CR (Abitaterone)  | OS  | 10 | 1626            | 16.74 | 0.053   | 0.204   | 0.045 | 46% | 0%  | 74% | 0.069       | F |
| Guan Y            | 2020 | NLR | Prostate CR (Abitaterone)  | PFS | 2  | 198             | 3.54  | 0.060   | 0.429   | 0.362 | 72% | 0%  | 94% | NA          | T |
| Guan Y            | 2020 | NLR | Prostate CR (Enzalutamide) | OS  | 5  | 1518            | 10.23 | 0.037   | 0.148   | 0.025 | 61% | 0%  | 85% | 0.110       | F |
| Guan Y            | 2020 | NLR | Prostate CR (Enzalutamide) | PFS | 2  | 427             | 9.97  | 0.002   | 0.314   | 0.155 | 90% | 63% | 97% | NA          | T |
| Cao J             | 2016 | NLR | Prostate Localised         | RFS | 7  | 11745           | 62.96 | < 0.001 | 0.49    | 0.18  | 90% | 83% | 95% | 0.351065463 | F |
| Dong YW           | 2016 | NLR | Rectal                     | OS  | 6  | 857             | 1.78  | 0.879   | < 0.001 | 1.822 | 0%  | 0%  | 29% | 0.298       | T |
| Dong YW           | 2016 | NLR | Rectal                     | DFS | 3  | 403             | 0.91  | 0.635   | < 0.001 | 1.135 | 0%  | 0%  | 77% | 0.538       | F |
| Dong YW           | 2016 | NLR | Rectal                     | RFS | 3  | 433             | 0.76  | 0.684   | < 0.001 | 0.710 | 0%  | 0%  | 73% | 0.545       | F |
| Na N              | 2016 | NLR | Renal                      | PFS | 8  | 1115*           | 58.02 | < 0.001 | 0.398   | 0.125 | 88% | 78% | 93% | 0.046       | F |
| Luo Y             | 2015 | NLR | Renal                      | OS  | 14 | 3373            | 18.39 | 0.104   | 0.185   | 0.034 | 35% | 0%  | 66% | 0.017       | F |
| Luo Y             | 2015 | NLR | Renal                      | RFS | 3  | 700             | 2.02  | 0.364   | 0.079   | 0.116 | 1%  | 0%  | 90% | 0.392       | T |
| Luo Y             | 2015 | NLR | Renal                      | CSS | 4  | 1728            | 21.92 | < 0.001 | 0.309   | 0.100 | 86% | 67% | 94% | 0.534       | T |
| Shen M            | 2014 | IN  | Renal                      | OS  | 2  | 206             | 0.67  | 0.411   | < 0.001 | 0.093 | 0%  | NA  | NA  | NA          | T |
| Semeniuk-Wojtas A | 2018 | NLR | Renal (TKI)                | OS  | 7  | NA <sup>†</sup> | 10.29 | 0.113   | 0.220   | 0.065 | 42% | 0%  | 75% | 0.385       | F |
| Semeniuk-Wojtas A | 2018 | NLR | Renal (TKI)                | PFS | 6  | NA <sup>†</sup> | 48.32 | < 0.001 | 0.439   | 0.166 | 90% | 80% | 95% | 0.120       | F |
| Boissier R        | 2017 | NLR | Renal Advanced             | OS  | 7  | 1304 (331/337)* | 19.39 | 0.004   | 0.299   | 0.082 | 69% | 32% | 86% | 0.009       | T |
| Boissier R        | 2017 | NLR | Renal Advanced             | PFS | 3  | 306 (143/163)   | 0.50  | 0.779   | < 0.001 | 0.102 | 0%  | 0%  | 58% | 0.981       | T |
| Boissier R        | 2017 | NLR | Renal Localised            | OS  | 3  | 1168 (403/651)* | 7.84  | 0.020   | 0.398   | 0.234 | 74% | 15% | 92% | 0.219       | F |
| Boissier R        | 2017 | NLR | Renal Localised            | RFS | 6  | 1962 (487/817)* | 28.36 | < 0.001 | 0.405   | 0.144 | 82% | 63% | 92% | 0.007       | F |
| Li LQ             | 2020 | NLR | STS                        | DFS | 7  | 1239            | 4.64  | 0.590   | < 0.001 | 0.035 | 0%  | 0%  | 62% | 0.125       | F |
| Liu G             | 2018 | NLR | STS                        | OS  | 13 | 2658*           | 49.41 | < 0.001 | 0.243   | 0.044 | 76% | 58% | 86% | 0.018       | T |
| Li LQ             | 2020 | NLR | STS (Synovial Sarcoma)     | OS  | 3  | NA <sup>†</sup> | 1.35  | 0.510   | < 0.001 | 0.147 | 0%  | 0%  | 85% | 0.464       | T |
| Li LQ             | 2020 | NLR | STS (Liposarcoma)          | OS  | 2  | NA <sup>†</sup> | 0.00  | 0.952   | < 0.001 | 0.225 | 0%  | NA  | NA  | NA          | F |
| Feng J            | 2020 | NLR | Thyroid                    | DFS | 7  | 6343            | 17.61 | 0.007   | 0.710   | 0.473 | 66% | 24% | 85% | 0.207       | T |
| Luo Y             | 2015 | NLR | Upper Urinary              | RFS | 2  | 802             | 1.13  | 0.287   | 0.105   | 0.133 | 12% | NA  | NA  | NA          | F |
| Wei Y             | 2014 | NLR | Urinary                    | OS  | 13 | 3391            | 28.41 | 0.005   | 0.279   | 0.058 | 58% | 22% | 77% | 0.001       | F |
| Su S              | 2019 | NLR | Urothelial                 | OS  | 7  | 2554            | 13.04 | 0.042   | 0.241   | 0.063 | 54% | 0%  | 80% | 0.844       | T |
| Su S              | 2019 | NLR | Urothelial                 | DFS | 2  | 400             | 2.43  | 0.119   | 0.270   | 0.176 | 59% | 0%  | 90% | NA          | T |
| Vartolomei M      | 2018 | NLR | Urothelial                 | RFS | 6  | 3563            | 14.13 | 0.015   | 0.299   | 0.100 | 65% | 15% | 85% | 0.021       | F |
| Suh J             | 2019 | NLR | Urothelial (Chemotherapy)  | OS  | 5  | 1664            | 5.69  | 0.224   | 0.089   | 0.015 | 30% | 0%  | 73% | 0.131       | T |

|        |      |     |                                    |     |    |       |       |         |         |       |     |     |     |         |   |
|--------|------|-----|------------------------------------|-----|----|-------|-------|---------|---------|-------|-----|-----|-----|---------|---|
| Suh J  | 2019 | NLR | Urothelial<br>(Chemotherapy)       | PFS | 2  | 500   | 2.75  | 0.097   | 0.139   | 0.043 | 64% | 0%  | 92% | NA      | T |
| Suh J  | 2019 | NLR | Urothelial<br>(Nephroureterectomy) | OS  | 3  | 1103  | 1.54  | 0.463   | < 0.001 | 0.067 | 0%  | 0%  | 86% | 0.544   | F |
| Suh J  | 2019 | NLR | Urothelial<br>(Nephroureterectomy) | PFS | 8  | 4411  | 17.85 | 0.013   | 0.294   | 0.089 | 61% | 15% | 82% | 0.011   | F |
| Suh J  | 2019 | NLR | Urothelial (Radical<br>Cystectomy) | CSS | 9  | 6974  | 69.19 | < 0.001 | 0.333   | 0.073 | 88% | 80% | 93% | 0.001   | F |
| Suh J  | 2019 | NLR | Urothelial (Radical<br>Cystectomy) | OS  | 10 | 7049  | 55.80 | < 0.001 | 0.380   | 0.086 | 84% | 72% | 91% | < 0.001 | F |
| Suh J  | 2019 | NLR | Urothelial (Radical<br>Cystectomy) | PFS | 5  | 5935  | 21.73 | < 0.001 | 0.149   | 0.021 | 82% | 57% | 92% | 0.027   | T |
| Mori K | 2020 | NLR | UTUC<br>(Nephroureterectomy)       | CSS | 12 | 6350  | 22.36 | 0.022   | 0.220   | 0.050 | 51% | 5%  | 75% | 0.104   | F |
| Mori K | 2020 | NLR | UTUC (Radical<br>Cystectomy)       | CSS | 12 | 11158 | 50.31 | < 0.001 | 0.175   | 0.020 | 78% | 62% | 87% | < 0.001 | F |

=number of component studies with in review, (NA) Not applicable, (T) True, (F) False, (HR), Hazard ratio, (NLR) Neutrophil to lymphocyte ratio, (IN) Intratumoural neutrophils, (PN) Peritumoural neutrophils, (SN) Stromal Neutrophils, (OS) Overall Survival, (DFS) Disease-Free Survival, (PFS) Progression-Free Survival, (RFS) Reoccurrence-Free Survival, (CSS) Cancer Specific Survival, (VEGFR) Vascular Endothelial Growth Factor Receptor, (PC) Palliative Chemotherapy, (BR) Surgical Bowel Resection, (NAC) Neoadjuvant Chemotherapy, (STS) Soft Tissue Sarcoma, (UTR) Urothelial Transurethral Resection, (SR) Surgical Resection, (GNT) Gastroenteropancreatic Neuroendocrine Tumors, (SCC) Squamous Cell Carcinoma, (ST) Systematic Therapy, (MT) Mixed Therapy, (TT) Targeted Therapy, (CLM) Colorectal Liver Metastasis, (NS) Non-surgical, (ICC) Intrahepatic Cholangiocarcinoma, (RFA) Radiofrequency Ablation, (TACE) Trans-Arterial hemoembolization, (MPM) Malignant Pleural Mesothelioma, (NSCLC) Non-Small Cell Lung Cancer, (NHC), Neck and Head Cancer, (UTUC) Upper Tract Urothelial Carcinoma, (DCRT) Definitive Chemoradiotherapy, (CR) Castration resistant, (TKI) Tyrosine Kinase Inhibitor.

All-cancers are defined as a grouping of cancer diagnosis unrelated to site, stage or treatment unless otherwise specified.  
Review reported incomplete data on sample size.

## Appendix F: Results of subgroup analyses of adjusted versus unadjusted effect estimates

| Author         | Year | Biomarker | Outcome Measure | Cancer Site          | Adjustment   | N   | Random Effects |      |      | Fixed Effects |      |      | 95% Prediction Interval |        | Test for subgroup differences (random) |        |
|----------------|------|-----------|-----------------|----------------------|--------------|-----|----------------|------|------|---------------|------|------|-------------------------|--------|----------------------------------------|--------|
|                |      |           |                 |                      |              |     | HR             | LL   | UL   | HR            | LL   | UL   | LL                      | UL     | Q                                      | p-val  |
| Paramanathan A | 2014 | NLR       | DFS             | All Cancers          | univariate   | 2   | 1.93           | 1.71 | 2.18 | 1.93          | 1.71 | 2.18 | NA                      | NA     | 0.69                                   | 0.4059 |
|                |      |           |                 |                      | multivariate | 18  | 2.16           | 1.71 | 2.72 | 1.29          | 1.27 | 1.30 | 0.78                    | 5.97   |                                        |        |
| Dolan R        | 2017 | NLR       | OS              | All Cancers Operable | univariate   | 20  | 1.64           | 1.43 | 1.87 | 1.26          | 1.20 | 1.31 | 1.02                    | 2.63   | 0.05                                   | 0.82   |
|                |      |           |                 |                      | multivariate | 100 | 1.67           | 1.55 | 1.79 | 1.16          | 1.15 | 1.17 | 0.95                    | 2.92   |                                        |        |
| Dolan R        | 2017 | NLR       | CSS             | All Cancers Operable | univariate   | 7   | 1.16           | 1.07 | 1.27 | 1.16          | 1.07 | 1.27 | 1.04                    | 1.31   | 15.55                                  | 0.0001 |
|                |      |           |                 |                      | multivariate | 34  | 1.58           | 1.40 | 1.79 | 1.06          | 1.04 | 1.07 | 0.87                    | 2.87   |                                        |        |
| Tan Q          | 2018 | NLR       | OS              | ICI                  | univariate   | 5   | 2.56           | 1.45 | 4.52 | 2.01          | 1.51 | 2.69 | 0.44                    | 15.08  | 0.30                                   | 0.585  |
|                |      |           |                 |                      | multivariate | 13  | 2.14           | 1.57 | 2.91 | 1.05          | 1.00 | 1.10 | 0.73                    | 6.27   |                                        |        |
| Tan Q          | 2018 | NLR       | PFS             | ICI                  | univariate   | 5   | 1.90           | 1.39 | 2.60 | 1.76          | 1.42 | 2.19 | 0.79                    | 4.54   | 0.36                                   | 0.5465 |
|                |      |           |                 |                      | multivariate | 6   | 1.65           | 1.20 | 2.28 | 1.04          | 0.99 | 1.09 | 0.59                    | 4.63   |                                        |        |
| Zheng DC       | 2016 | NLR       | PFS             | Colorectal           | univariate   | 3   | 1.49           | 0.91 | 2.45 | 1.51          | 1.08 | 2.12 | 0.01                    | 225.93 | 1.25                                   | 0.2644 |
|                |      |           |                 |                      | multivariate | 11  | 2.08           | 1.53 | 2.81 | 1.75          | 1.50 | 2.05 | 0.83                    | 5.20   |                                        |        |
| Zhou Y         | 2018 | NLR       | OS              | Pancreas             | univariate   | 2   | 1.61           | 0.68 | 3.85 | 1.73          | 1.38 | 2.16 | NA                      | NA     | 0.07                                   | 0.7918 |
|                |      |           |                 |                      | multivariate | 41  | 1.82           | 1.59 | 2.07 | 1.34          | 1.28 | 1.40 | 0.90                    | 3.66   |                                        |        |
| Mowbray N      | 2018 | NLR       | OS              | Pancreas resect      | univariate   | 2   | 1.48           | 1.03 | 2.12 | 1.48          | 1.04 | 2.10 | NA                      | NA     | 0.86                                   | 0.3526 |
|                |      |           |                 |                      | multivariate | 6   | 1.79           | 1.50 | 2.13 | 1.78          | 1.50 | 2.10 | 1.35                    | 2.37   |                                        |        |
| Wu J           | 2017 | NLR       | OS              | Cervical             | univariate   | 4   | 1.47           | 1.17 | 1.84 | 1.47          | 1.17 | 1.84 | 0.90                    | 2.41   | 0.02                                   | 0.9003 |
|                |      |           |                 |                      | multivariate | 8   | 1.51           | 1.11 | 2.03 | 1.20          | 1.15 | 1.25 | 0.59                    | 3.85   |                                        |        |
| Wu J           | 2017 | NLR       | PFS             | Cervical             | univariate   | 4   | 1.63           | 1.28 | 2.08 | 1.63          | 1.28 | 2.08 | 0.96                    | 2.78   | 0.10                                   | 0.7517 |
|                |      |           |                 |                      | multivariate | 6   | 1.76           | 1.19 | 2.62 | 1.18          | 1.13 | 1.23 | 0.43                    | 7.21   |                                        |        |
| Zhou Q         | 2017 | NLR       | PFS             | Ovarian              | univariate   | 2   | 1.51           | 0.69 | 3.30 | 1.05          | 1.02 | 1.08 | NA                      | NA     | 0.02                                   | 0.8934 |
|                |      |           |                 |                      | multivariate | 10  | 1.60           | 1.26 | 2.02 | 1.37          | 1.26 | 1.48 | 0.76                    | 3.34   |                                        |        |
| Liu X          | 2017 | NLR       | DFS             | Breast               | univariate   | 2   | 1.40           | 0.88 | 2.24 | 1.40          | 0.88 | 2.24 | NA                      | NA     | 0.70                                   | 0.4025 |
|                |      |           |                 |                      | multivariate | 10  | 1.78           | 1.32 | 2.39 | 1.05          | 1.00 | 1.10 | 0.75                    | 4.22   |                                        |        |
| Tang H         | 2017 | NLR       | OS              | BT                   | univariate   | 2   | 1.40           | 1.09 | 1.80 | 1.40          | 1.09 | 1.80 | NA                      | NA     | 0.44                                   | 0.508  |
|                |      |           |                 |                      | multivariate | 12  | 1.54           | 1.36 | 1.75 | 1.50          | 1.36 | 1.66 | 1.16                    | 2.05   |                                        |        |
| Tang H         | 2017 | NLR       | RFS             | BT                   | univariate   | 2   | 1.30           | 1.07 | 1.58 | 1.30          | 1.07 | 1.58 | NA                      | NA     | 1.53                                   | 0.2158 |
|                |      |           |                 |                      | multivariate | 3   | 1.78           | 1.13 | 2.82 | 1.55          | 1.21 | 1.99 | 0.01                    | 271.58 |                                        |        |

|          |      |     |     |                      |              |    |      |      |      |      |      |      |      |       |       |        |
|----------|------|-----|-----|----------------------|--------------|----|------|------|------|------|------|------|------|-------|-------|--------|
| Zhao QT  | 2015 | NLR | PFS | Lung                 | univariate   | 2  | 0.96 | 0.34 | 2.72 | 0.78 | 0.59 | 1.02 | NA   | NA    | 0.60  | 0.437  |
|          |      |     |     |                      | multivariate | 7  | 1.46 | 1.21 | 1.77 | 1.26 | 1.19 | 1.34 | 0.87 | 2.47  |       |        |
| Zhao QT  | 2015 | NLR | OS  | Lung                 | univariate   | 4  | 1.22 | 0.74 | 2.04 | 1.34 | 1.19 | 1.50 | 0.11 | 13.51 | 1.05  | 0.3046 |
|          |      |     |     |                      | multivariate | 17 | 1.61 | 1.40 | 1.86 | 1.19 | 1.14 | 1.24 | 0.99 | 2.64  |       |        |
| Su L     | 2017 | NLR | CSS | Nasopharyngeal       | univariate   | 1  | 1.72 | 0.78 | 3.79 | 1.72 | 0.78 | 3.79 | NA   | NA    | 0.20  | 0.6586 |
|          |      |     |     |                      | multivariate | 2  | 1.43 | 1.16 | 1.76 | 1.41 | 1.19 | 1.66 | NA   | NA    |       |        |
| Yu Y     | 2018 | NLR | RFS | Head and Neck        | univariate   | 1  | 2.62 | 1.23 | 5.58 | 2.62 | 1.23 | 5.58 | NA   | NA    | 1.78  | 0.1825 |
|          |      |     |     |                      | multivariate | 3  | 1.47 | 0.99 | 2.18 | 1.30 | 1.09 | 1.54 | 0.02 | 110.5 |       |        |
| Wang Y   | 2018 | NLR | OS  | OSCC                 | univariate   | 2  | 1.49 | 0.86 | 2.59 | 1.47 | 0.95 | 2.28 | NA   | NA    | 0.07  | 0.7941 |
|          |      |     |     |                      | multivariate | 4  | 1.62 | 1.25 | 2.10 | 1.58 | 1.26 | 1.98 | 0.78 | 3.39  |       |        |
| Wang Y   | 2018 | NLR | DFS | OSCC                 | univariate   | 2  | 2.56 | 1.19 | 5.54 | 2.56 | 1.19 | 5.54 | NA   | NA    | 0.58  | 0.4453 |
|          |      |     |     |                      | multivariate | 4  | 1.86 | 1.38 | 2.49 | 1.86 | 1.38 | 2.49 | 0.97 | 3.55  |       |        |
| Zhan H   | 2018 | NLR | OS  | Melanoma             | univariate   | 1  | 1.81 | 0.69 | 4.75 | 1.81 | 0.69 | 4.75 | NA   | NA    | 0.06  | 0.7988 |
|          |      |     |     |                      | multivariate | 9  | 1.59 | 1.24 | 2.03 | 1.10 | 1.06 | 1.14 | 0.69 | 3.69  |       |        |
| Li X     | 2017 | NLR | CSS | UUB                  | univariate   | 5  | 1.63 | 1.38 | 1.93 | 1.62 | 1.39 | 1.90 | 1.18 | 2.26  | 0.02  | 0.8965 |
|          |      |     |     |                      | multivariate | 12 | 1.66 | 1.34 | 2.06 | 1.27 | 1.18 | 1.38 | 0.85 | 3.23  |       |        |
| Xiao WK  | 2014 | NLR | OS  | HCC MT               | univariate   | 1  | 2.77 | 1.29 | 5.96 | 2.77 | 1.29 | 5.96 | NA   | NA    | 1.24  | 0.266  |
|          |      |     |     |                      | multivariate | 2  | 1.74 | 1.29 | 2.34 | 1.74 | 1.29 | 2.34 | NA   | NA    |       |        |
| Li X     | 2017 | NLR | PFS | UUB                  | univariate   | 6  | 1.64 | 1.36 | 1.97 | 1.64 | 1.36 | 1.97 | 1.26 | 2.12  | 0.25  | 0.6197 |
|          |      |     |     |                      | multivariate | 13 | 1.76 | 1.42 | 2.18 | 1.42 | 1.27 | 1.60 | 0.94 | 3.28  |       |        |
| Cao J    | 2016 | NLR | PFS | Prostate CR          | univariate   | 4  | 1.40 | 1.23 | 1.61 | 1.40 | 1.23 | 1.61 | 1.04 | 1.89  | 7.85  | 0.0051 |
|          |      |     |     |                      | multivariate | 2  | 2.67 | 1.74 | 4.11 | 2.67 | 1.74 | 4.11 | NA   | NA    |       |        |
| Luo Y    | 2015 | NLR | OS  | Renal                | univariate   | 1  | 1.78 | 1.45 | 2.19 | 1.78 | 1.45 | 2.19 | NA   | NA    | 0.53  | 0.4648 |
|          |      |     |     |                      | multivariate | 12 | 1.98 | 1.63 | 2.41 | 1.80 | 1.59 | 2.04 | 1.16 | 3.37  |       |        |
| Luo Y    | 2015 | NLR | CSS | Renal                | univariate   | 1  | 2.06 | 1.57 | 2.70 | 2.06 | 1.57 | 2.70 | NA   | NA    | 12.16 | 0.0005 |
|          |      |     |     |                      | multivariate | 3  | 1.12 | 0.91 | 1.38 | 1.07 | 0.94 | 1.21 | 0.15 | 8.57  |       |        |
| Luo Y    | 2015 | NLR | RFS | Renal                | univariate   | 2  | 2.03 | 1.06 | 3.88 | 1.90 | 1.23 | 2.93 | NA   | NA    | 0.02  | 0.8985 |
|          |      |     |     |                      | multivariate | 1  | 2.16 | 1.09 | 4.27 | 2.16 | 1.09 | 4.27 | NA   | NA    |       |        |
| Wu S     | 2018 | NLR | OS  | Bladder (Metastatic) | univariate   | 3  | 1.68 | 1.39 | 2.03 | 1.68 | 1.39 | 2.03 | 0.49 | 5.79  | 0.30  | 0.5854 |
|          |      |     |     |                      | multivariate | 1  | 1.49 | 1.02 | 2.18 | 1.49 | 1.02 | 2.18 | NA   | NA    |       |        |
| Zheng DC | 2016 | NLR | OS  | Colorectal           | univariate   | 2  | 2.53 | 1.40 | 4.57 | 2.53 | 1.40 | 4.57 | NA   | NA    | 0.86  | 0.3532 |
|          |      |     |     |                      | multivariate | 19 | 1.88 | 1.54 | 2.30 | 1.57 | 1.43 | 1.72 | 0.91 | 3.91  |       |        |
| Zhang X  | 2018 | NLR | OS  | Oesophageal          | univariate   | 2  | 1.98 | 0.97 | 4.02 | 1.61 | 1.26 | 2.04 | NA   | NA    | 0.61  | 0.4348 |



|         |      |     |     |                                         |              |    |      |      |      |      |      |      |      |           |       |        |
|---------|------|-----|-----|-----------------------------------------|--------------|----|------|------|------|------|------|------|------|-----------|-------|--------|
|         |      |     |     |                                         | multivariate | 24 | 1.48 | 1.29 | 1.70 | 1.35 | 1.28 | 1.43 | 0.83 | 2.64      |       |        |
| Chen    | 2017 | NLR | OS  | MPM                                     | univariate   | 2  | 1.27 | 0.48 | 3.39 | 1.64 | 1.12 | 2.39 | NA   | NA        | 0.10  | 0.7564 |
|         |      |     |     |                                         | multivariate | 8  | 1.50 | 1.12 | 2.01 | 1.25 | 1.15 | 1.36 | 0.58 | 3.89      |       |        |
| Zhang X | 2018 | NLR | OS  | Oesophageal (Surgery)                   | univariate   | 2  | 1.98 | 0.97 | 4.02 | 1.61 | 1.26 | 2.04 | NA   | NA        | 0.68  | 0.4085 |
|         |      |     |     |                                         | multivariate | 19 | 1.45 | 1.24 | 1.71 | 1.32 | 1.24 | 1.40 | 0.76 | 2.77      |       |        |
| Zhang X | 2018 | NLR | CSS | Oesophageal                             | univariate   | 2  | 1.53 | 0.79 | 2.98 | 1.63 | 1.29 | 2.05 | NA   | NA        | 0.12  | 0.7247 |
|         |      |     |     |                                         | multivariate | 5  | 1.35 | 1.06 | 1.71 | 1.33 | 1.10 | 1.62 | 0.74 | 2.46      |       |        |
| Zhang X | 2018 | NLR | OS  | Oesophageal Squamous Cell Carcinoma     | univariate   | 2  | 1.98 | 0.97 | 4.02 | 1.61 | 1.26 | 2.04 | NA   | NA        | 1.05  | 0.3057 |
|         |      |     |     |                                         | multivariate | 17 | 1.35 | 1.18 | 1.55 | 1.38 | 1.28 | 1.48 | 0.83 | 2.21      |       |        |
| Lei Y   | 2019 | NLR | OS  | Glioma                                  | univariate   | 3  | 1.69 | 1.08 | 2.64 | 1.74 | 1.42 | 2.14 | 0.01 | 305.73    | 0.29  | 0.5872 |
|         |      |     |     |                                         | multivariate | 13 | 1.48 | 1.22 | 1.79 | 1.03 | 1.00 | 1.05 | 0.78 | 2.81      |       |        |
| Lu Y    | 2020 | NLR | OS  | NSCLC                                   | univariate   | 1  | 0.86 | 0.64 | 1.15 | 0.86 | 0.64 | 1.15 | NA   | NA        | 10.58 | 0.0011 |
|         |      |     |     |                                         | multivariate | 20 | 1.44 | 1.29 | 1.61 | 1.32 | 1.25 | 1.40 | 0.97 | 2.15      |       |        |
| Tham T  | 2018 | NLR | OS  | Head and Neck                           | univariate   | 2  | 2.01 | 1.28 | 3.16 | 2.01 | 1.28 | 3.16 | NA   | NA        | 0.46  | 0.4955 |
|         |      |     |     |                                         | multivariate | 24 | 1.71 | 1.49 | 1.96 | 1.62 | 1.46 | 1.79 | 1.15 | 2.55      |       |        |
| Tham T  | 2018 | NLR | DFS | Head and neck                           | univariate   | 2  | 1.81 | 1.25 | 2.62 | 1.81 | 1.25 | 2.62 | NA   | NA        | 0.16  | 0.6904 |
|         |      |     |     |                                         | multivariate | 9  | 1.64 | 1.22 | 2.21 | 1.43 | 1.18 | 1.74 | 0.77 | 3.49      |       |        |
| Cho J   | 2018 | NLR | OS  | Head and Neck (Squamous Cell Carcinoma) | univariate   | 6  | 2.33 | 1.76 | 3.07 | 2.32 | 1.80 | 3.00 | 1.42 | 3.80      | 1.71  | 0.1913 |
|         |      |     |     |                                         | multivariate | 18 | 1.86 | 1.55 | 2.24 | 1.67 | 1.49 | 1.88 | 1.03 | 3.37      |       |        |
| Cho J   | 2018 | NLR | DFS | Head and Neck (Squamous Cell Carcinoma) | univariate   | 3  | 3.16 | 1.18 | 8.45 | 2.34 | 1.52 | 3.62 | 0.00 | 199856.61 | 1.44  | 0.2307 |
|         |      |     |     |                                         | multivariate | 9  | 1.69 | 1.26 | 2.25 | 1.36 | 1.19 | 1.56 | 0.72 | 3.93      |       |        |
| Yang L  | 2019 | NLR | CSS | Head and Neck (Squamous Cell Carcinoma) | univariate   | 2  | 1.40 | 0.97 | 2.01 | 1.40 | 0.97 | 2.01 | NA   | NA        | 0.53  | 0.4656 |
|         |      |     |     |                                         | multivariate | 3  | 1.80 | 1.01 | 3.19 | 1.48 | 1.23 | 1.78 | 0.00 | 1651.83   |       |        |
| Yang L  | 2019 | NLR | OS  | Hypopharynx                             | univariate   | 1  | 2.99 | 1.91 | 4.67 | 2.99 | 1.91 | 4.67 | NA   | NA        | 0.06  | 0.8037 |
|         |      |     |     |                                         | multivariate | 2  | 2.75 | 1.66 | 4.54 | 2.75 | 1.66 | 4.54 | NA   | NA        |       |        |
| Yang L  | 2019 | NLR | DFS | Oropharynx                              | univariate   | 1  | 1.72 | 1.04 | 2.85 | 1.72 | 1.04 | 2.85 | NA   | NA        | 0.01  | 0.9181 |
|         |      |     |     |                                         | multivariate | 2  | 1.66 | 1.12 | 2.48 | 1.66 | 1.12 | 2.48 | NA   | NA        |       |        |
| Guan Y  | 2020 | NLR | OS  | Prostate CR (Abitaterone)               | univariate   | 3  | 1.70 | 1.11 | 2.59 | 1.51 | 1.25 | 1.83 | 0.01 | 205.11    | 0.02  | 0.8863 |
|         |      |     |     |                                         | multivariate | 7  | 1.75 | 1.46 | 2.10 | 1.75 | 1.46 | 2.10 | 1.38 | 2.22      |       |        |
| Guan Y  | 2020 | NLR | OS  | Prostate CR (Enzalutamide)              | univariate   | 2  | 2.07 | 1.59 | 2.69 | 2.07 | 1.59 | 2.69 | NA   | NA        | 9.26  | 0.0023 |
|         |      |     |     |                                         | multivariate | 3  | 1.35 | 1.24 | 1.46 | 1.35 | 1.24 | 1.46 | 0.80 | 2.26      |       |        |
| Guan Y  | 2020 | NLR | PFS | Prostate CR (Enzalutamide)              | univariate   | 1  | 1.98 | 1.53 | 2.56 | 1.98 | 1.53 | 2.56 | NA   | NA        | 9.97  | 0.0016 |
|         |      |     |     |                                         | multivariate | 1  | 1.24 | 1.08 | 1.42 | 1.24 | 1.08 | 1.42 | NA   | NA        |       |        |

|        |      |     |     |         |              |   |      |      |      |      |      |      |      |       |      |        |
|--------|------|-----|-----|---------|--------------|---|------|------|------|------|------|------|------|-------|------|--------|
| Feng J | 2020 | NLR | DFS | Thyroid | univariate   | 5 | 1.47 | 0.67 | 3.23 | 1.17 | 0.98 | 1.39 | 0.11 | 20.43 | 2.02 | 0.1555 |
|        |      |     |     |         | multivariate | 2 | 3.51 | 1.42 | 8.69 | 3.51 | 1.42 | 8.69 | NA   | NA    |      |        |

N=number of component studies with in review, (LL) Lower Limited, (UL) Upper Limit, (NA) Not applicable, (T) True, (F) False, (HR), Hazard ratio, (NLR) Neutrophil to lymphocyte ratio, (IN) Intratumoural neutrophils, (PN) Peritumoural neutrophils, (SN) Stromal Neutrophils, (OS) Overall Survival, (DFS) Disease-Free Survival, (PFS) Progression-Free Survival, (RFS) Reoccurrence-Free Survival, (CSS) Cancer Specific Survival, (VEGFR) Vascular Endothelial Growth Factor Receptor, (PC) Palliative Chemotherapy, (SBR) Surgical Bowel Resection, (NAC) Neoadjuvant Chemotherapy, (STS) Soft Tissue Sarcoma, (UTR) Urothelial Transurethral Resection, (SR) Surgical Resection, (GNT) Gastroenteropancreatic Neuroendocrine Tumors, (SCC) Squamous Cell Carcinoma, (ST) Systematic Therapy, (MT) Mixed Therapy, (TT) Targeted Therapy, (CLM) Colorectal Liver Metastasis, (NS) Non-surgical, (ICC) Intrahepatic Cholangiocarcinoma, (RFA) Radiofrequency Ablation, (TACE) Trans-Arterial Chemoembolization, (MPM) Malignant Pleural Mesothelioma, (NSCLC) Non-Small Cell Lung Cancer, (NHC), Neck and Head Cancer, (UTUC) Upper Tract Urothelial Carcinoma, (DCRT) Definitive Chemoradiotherapy, (CR) Castration Resistant, (TKI) Tyrosine Kinase Inhibitor.

\*All-cancers are defined as a grouping of cancer diagnosis unrelated to site, stage or treatment unless otherwise specified.

†review reported incomplete data on sample size.

## Appendix G: Meta-regression results of NLR cut-off values

| Author         | Year | Site                                       | Outcome | N  | Regression coefficients |       |        |       | Tau <sup>2</sup> | I <sup>2</sup> | H <sup>2</sup> | R <sup>2</sup> | Test for residual heterogeneity |        | Test of Moderators |       |
|----------------|------|--------------------------------------------|---------|----|-------------------------|-------|--------|-------|------------------|----------------|----------------|----------------|---------------------------------|--------|--------------------|-------|
|                |      |                                            |         |    | Intercept               | p-val | NLR    | p-val |                  |                |                |                | QE                              | p-val  | QM                 | p-val |
| Jiang T        | 2018 | Advanced Cancer (Anti-VEGFR)               | OS      | 14 | -0.789                  | 0.205 | 0.471  | 0.017 | 0.087            | 79%            | 4.681          | 34%            | 72.859                          | <0.001 | 5.737              | 0.017 |
| Jiang T        | 2018 | Advanced Cancer (Immunotherapy)            | OS      | 23 | 0.123                   | 0.700 | 0.157  | 0.082 | 0.074            | 72%            | 3.550          | 16%            | 87.993                          | <0.001 | 3.032              | 0.082 |
| Jiang T        | 2018 | Advanced Cancer (Immunotherapy)            | PFS     | 16 | 0.796                   | 0.060 | -0.063 | 0.606 | 0.104            | 88%            | 8.373          | 0%             | 103.940                         | <0.001 | 0.265              | 0.606 |
| Mei Z          | 2017 | Composite endpoints                        | OS      | 62 | 0.384                   | 0.021 | 0.036  | 0.413 | 0.058            | 82%            | 5.573          | 0%             | 437.578                         | <0.001 | 0.669              | 0.413 |
| Mei Z          | 2017 | Composite endpoints                        | PFS     | 23 | 0.107                   | 0.691 | 0.112  | 0.150 | 0.060            | 88%            | 8.205          | 7%             | 191.392                         | <0.001 | 2.072              | 0.150 |
| Paramanathan A | 2014 | Composite endpoints                        | DFS     | 20 | 0.329                   | 0.411 | 0.105  | 0.282 | 0.196            | 99%            | 196.092        | 0%             | 525.841                         | <0.001 | 1.156              | 0.282 |
| Hu G           | 2019 | Bladder                                    | OS      | 17 | 0.559                   | 0.119 | -0.077 | 0.539 | 0.091            | 96%            | 24.628         | 0%             | 68.824                          | <0.001 | 0.378              | 0.539 |
| Wu S           | 2018 | Bladder                                    | RFS     | 8  | 1.142                   | 0.216 | -0.266 | 0.440 | 0.047            | 78%            | 4.512          | 0%             | 22.656                          | 0.001  | 0.597              | 0.440 |
| Hu G           | 2019 | Bladder (Radical Cystectomy and NAC)       | OS      | 4  | -0.081                  | 0.409 | 0.039  | 0.137 | 0                | 0%             | 1.000          | 100%           | 1.488                           | 0.475  | 2.209              | 0.137 |
| Hu G           | 2019 | Bladder (Radical Cystectomy)               | OS      | 8  | 0.401                   | 0.676 | -0.070 | 0.852 | 0.045            | 93%            | 13.910         | 0%             | 20.803                          | 0.002  | 0.035              | 0.852 |
| Suh J          | 2019 | Bladder (UTR)                              | PFS     | 4  | -0.576                  | 0.870 | 0.631  | 0.675 | 0                | 0%             | 1              | 0%             | 1.535                           | 0.464  | 0.176              | 0.675 |
| Suh J          | 2019 | Bladder (UTR)                              | RFS     | 5  | -0.259                  | 0.798 | 0.452  | 0.294 | 0                | 0%             | 1.000          | 94%            | 3.926                           | 0.270  | 1.102              | 0.294 |
| Ethier JL      | 2017 | Breast                                     | OS      | 13 | 1.582                   | 0.001 | -0.197 | 0.141 | 0.089            | 46%            | 1.841          | 11%            | 20.834                          | 0.035  | 2.164              | 0.141 |
| Liu X          | 2017 | Breast                                     | DFS     | 11 | 0.550                   | 0.048 | -0.010 | 0.921 | 0.003            | 3%             | 1.030          | 0%             | 11.678                          | 0.232  | 0.010              | 0.921 |
| Chen J         | 2018 | Breast (Metastatic)                        | DFS     | 3  | 0.587                   | 0.576 | 0.052  | 0.865 | 0                | 0%             | 1.000          | NA             | 0.019                           | 0.889  | 0.029              | 0.865 |
| Duan J         | 2018 | Breast (SR)                                | DFS     | 11 | 1.191                   | 0.028 | -0.212 | 0.263 | 0.079            | 53%            | 2.127          | 0%             | 18.630                          | 0.029  | 1.254              | 0.263 |
| Duan J         | 2018 | Breast (SR)                                | OS      | 10 | 1.977                   | 0.065 | -0.348 | 0.322 | 0.248            | 61%            | 2.579          | 0%             | 19.344                          | 0.013  | 0.980              | 0.322 |
| Guo W          | 2019 | Breast (Triple Negative and Her2 Positive) | DFS     | 27 | 0.474                   | 0.048 | -0.002 | 0.982 | 0.044            | 49%            | 1.944          | 0%             | 51.454                          | 0.001  | 0.001              | 0.982 |
| Guo W          | 2019 | Breast (Triple Negative and Her2 Positive) | OS      | 28 | 0.435                   | 0.222 | 0.051  | 0.677 | 0.131            | 70%            | 3.350          | 0              | 88.623                          | <0.001 | 0.173              | 0.677 |
| Liu X          | 2017 | Breast (Triple Negative)                   | OS      | 4  | 1.656                   | 0.039 | -0.229 | 0.355 | 0                | 0%             | 1.000          | NA             | 1.624                           | 0.444  | 0.856              | 0.355 |
| Liu X          | 2017 | Breast (Triple Negative)                   | DFS     | 4  | -0.079                  | 0.963 | 0.615  | 0.434 | 0                | 0%             | 1.000          | NA             | 1.216                           | 0.544  | 0.613              | 0.434 |
| Tang H         | 2017 | Biliary Tract                              | OS      | 14 | 0.415                   | 0.064 | 0.002  | 0.981 | 0.011            | 25%            | 1.334          | 0              | 15.114                          | 0.235  | 0.001              | 0.981 |
| Tang H         | 2017 | Biliary Tract                              | RFS     | 5  | -0.275                  | 0.513 | 0.207  | 0.123 | 0.011            | 25%            | 1.336          | 0              | 4.413                           | 0.220  | 2.374              | 0.123 |
| Wu J           | 2017 | Cervical                                   | OS      | 12 | -0.351                  | 0.565 | 0.305  | 0.223 | 0.063            | 60%            | 2.501          | 0              | 25.436                          | 0.005  | 1.482              | 0.223 |
| Wu J           | 2017 | Cervical                                   | PFS     | 10 | 0.525                   | 0.501 | 0.007  | 0.982 | 0.151            | 87%            | 7.494          | 0              | 86.656                          | <0.001 | 0.001              | 0.982 |
| Tang H         | 2016 | CLM                                        | OS      | 7  | 0.723                   | 0.237 | 0.011  | 0.929 | 0.002            | 3%             | 1.034          | NA             | 4.153                           | 0.528  | 0.008              | 0.929 |
| Tang H         | 2016 | CLM                                        | RFS     | 6  | -0.300                  | 0.423 | 0.224  | 0.008 | 0                | 0%             | 1.000          | 100%           | 2.025                           | 0.731  | 7.147              | 0.008 |
| Tang H         | 2016 | CLM (SR)                                   | OS      | 5  | 0.773                   | 0.202 | -0.009 | 0.945 | 0                | 0%             | 1.000          | NA             | 2.019                           | 0.568  | 0.005              | 0.945 |
| Tang H         | 2016 | CLM (SR)                                   | RFS     | 4  | -0.408                  | 0.331 | 0.240  | 0.010 | 0                | 0%             | 1.000          | 100%           | 0.604                           | 0.740  | 6.683              | 0.010 |

|             |      |                            |     |    |        |       |        |       |       |     |         |      |         |        |       |       |
|-------------|------|----------------------------|-----|----|--------|-------|--------|-------|-------|-----|---------|------|---------|--------|-------|-------|
| Zheng DC    | 2016 | Colorectal                 | OS  | 21 | 0.024  | 0.954 | 0.142  | 0.129 | 0.079 | 59% | 2.441   | 24%  | 40.665  | 0.003  | 2.299 | 0.129 |
| Zheng DC    | 2016 | Colorectal                 | PFS | 14 | 0.287  | 0.758 | 0.081  | 0.688 | 0.142 | 61% | 2.545   | 0%   | 27.803  | 0.006  | 0.161 | 0.688 |
| Malietzis G | 2014 | Colorectal (Chemotherapy)  | DFS | 3  | 0.312  | 0.502 | 0.029  | 0.801 | 0     | 0%  | 1.000   | NA   | 0.300   | 0.584  | 0.063 | 0.801 |
| Li H        | 2019 | Colorectal (SR)            | DFS | 9  | 0.840  | 0.091 | -0.110 | 0.405 | 0.107 | 57% | 2.330   | 0%   | 16.256  | 0.023  | 0.693 | 0.405 |
| Li H        | 2019 | Colorectal (SR)            | OS  | 11 | 0.470  | 0.204 | 0.014  | 0.892 | 0.071 | 59% | 2.445   | 0%   | 21.924  | 0.009  | 0.018 | 0.892 |
| Li H        | 2019 | Colorectal (SR)            | RFS | 3  | 1.486  | 0.040 | -0.168 | 0.358 | 0     | 0%  | 1       | 0%   | 0.869   | 0.351  | 0.846 | 0.358 |
| Ni L        | 2020 | Endometrial                | OS  | 9  | 0.817  | 0.163 | -0.008 | 0.971 | 0     | 0%  | 1       | 0    | 4.291   | 0.746  | 0.001 | 0.971 |
| Ni L        | 2020 | Endometrial                | PFS | 5  | 0.927  | 0.459 | -0.123 | 0.811 | 0.122 | 48% | 1.937   | 0%   | 5.831   | 0.120  | 0.057 | 0.811 |
| Sun J       | 2016 | Gastric                    | OS  | 19 | 0.346  | 0.090 | 0.110  | 0.094 | 0.016 | 40% | 1.679   | 0.33 | 29.531  | 0.030  | 2.808 | 0.094 |
| Sun J       | 2016 | Gastric                    | DFS | 7  | 0.767  | 0.077 | -0.111 | 0.465 | 0     | 0%  | 1.000   | NA   | 2.693   | 0.747  | 0.533 | 0.465 |
| Szor D      | 2018 | Gastric (SR)               | OS  | 7  | 0.263  | 0.723 | 0.293  | 0.214 | 0.262 | 80% | 5.012   | 11%  | 32.467  | <0.001 | 1.544 | 0.214 |
| Mellor K    | 2018 | Gastric (SR)               | DFS | 3  | 2.070  | 0.259 | -0.278 | 0.542 | 0.651 | 86% | 7.244   | 0%   | 7.244   | 0.007  | 0.372 | 0.542 |
| Lei Y       | 2019 | Glioma                     | OS  | 16 | 0.820  | 0.008 | -0.098 | 0.176 | 0.070 | 85% | 6.51147 | 13%  | 69.901  | <0.001 | 1.835 | 0.176 |
| Zhang J     | 2017 | Glioma                     | OS  | 6  | 1.102  | 0     | -0.147 | 0.017 | 0.002 | 4%  | 1.039   | 95%  | 2.787   | 0.594  | 5.733 | 0.017 |
| Zhou Y      | 2018 | GNT                        | OS  | 4  | 0.648  | 0.352 | 0.181  | 0.475 | 0     | 0%  | 1.000   | NA   | 1.496   | 0.473  | 0.510 | 0.475 |
| Zhou Y      | 2018 | GNT                        | RFS | 3  | 1.461  | 0.496 | -0.095 | 0.925 | 0.093 | 30% | 1.424   | 0%   | 1.424   | 0.233  | 0.009 | 0.925 |
| Ethier JL   | 2017 | Gynecologic                | OS  | 26 | 0.818  | 0.079 | -0.096 | 0.548 | 0.095 | 81% | 5.229   | 4%   | 87.001  | <0.001 | 0.360 | 0.548 |
| Xiao WK     | 2014 | HCC (MT)                   | OS  | 3  | 0.145  | 0.710 | 0.141  | 0.194 | 0     | 0%  | 1.000   | 100% | 0.282   | 0.596  | 1.684 | 0.194 |
| Wang Y      | 2018 | HCC (SR)                   | RFS | 9  | 0.727  | 0.041 | -0.081 | 0.528 | 0.019 | 29% | 1.415   | 0%   | 8.497   | 0.291  | 0.399 | 0.528 |
| Xu ZG       | 2018 | HCC (Transplant)           | OS  | 8  | 0.003  | 0.997 | 0.193  | 0.356 | 0.321 | 81% | 5.208   | 0%   | 36.397  | <0.001 | 0.853 | 0.356 |
| Xu ZG       | 2018 | HCC (Transplant)           | RFS | 4  | -0.151 | 0.926 | 0.373  | 0.356 | 0.246 | 69% | 3.204   | 0%   | 7.106   | 0.029  | 0.850 | 0.356 |
| Yu Y        | 2018 | Head and Neck              | RFS | 4  | -1.127 | 0.023 | 0.424  | 0.004 | 0     | 0%  | 1.000   | 100% | 1.120   | 0.571  | 8.446 | 0.004 |
| Tham T      | 2018 | Head and Neck              | OS  | 24 | -0.025 | 0.905 | 0.176  | 0.008 | 0.011 | 14% | 1.161   | 62%  | 24.905  | 0.302  | 7.037 | 0.008 |
| Tham T      | 2018 | Head and neck              | PFS | 5  | 0.186  | 0.930 | 0.067  | 0.930 | 0.077 | 67% | 3.052   | 0%   | 9.158   | 0.027  | 0.008 | 0.930 |
| Tham T      | 2018 | Head and neck              | DFS | 10 | 0.127  | 0.770 | 0.120  | 0.332 | 0.068 | 41% | 1.683   | 3%   | 13.679  | 0.091  | 0.941 | 0.332 |
| Tham T      | 2018 | Head and Neck (No Surgery) | OS  | 8  | 0.027  | 0.938 | 0.103  | 0.356 | 0.007 | 9%  | 1.094   | 0%   | 5.264   | 0.510  | 0.851 | 0.356 |
| Yang L      | 2019 | Head and Neck (SCC)        | CSS | 4  | 0.216  | 0.472 | 0.052  | 0.683 | 0     | 0%  | 1.000   | 0%   | 0.603   | 0.740  | 0.167 | 0.683 |
| Yang L      | 2019 | Head and Neck (SCC)        | PFS | 3  | 7.800  | 0.706 | -2.491 | 0.719 | 0.081 | 73% | 3.755   | 0%   | 3.755   | 0.053  | 0.129 | 0.719 |
| Cho J       | 2018 | Head and Neck (SCC)        | OS  | 24 | 0.313  | 0.250 | 0.108  | 0.161 | 0.072 | 50% | 1.997   | 0%   | 41.800  | 0.007  | 1.969 | 0.161 |
| Cho J       | 2018 | Head and Neck (SCC)        | DFS | 12 | 0.093  | 0.828 | 0.167  | 0.176 | 0.143 | 70% | 3.301   | 5%   | 34.232  | <0.001 | 1.834 | 0.176 |
| Tham T      | 2018 | Head and Neck (Surgery)    | OS  | 3  | 4.055  | 0.018 | -1.457 | 0.034 | 0     | 0%  | 1       | 100% | 0.433   | 0.510  | 4.472 | 0.034 |
| Min GT      | 2018 | Hepatocellular             | OS  | 44 | 0.140  | 0.532 | 0.106  | 0.097 | 0.178 | 93% | 15.368  | 3%   | 214.542 | <0.001 | 2.751 | 0.097 |
| Min GT      | 2018 | Hepatocellular             | DFS | 17 | 0.141  | 0.701 | 0.145  | 0.194 | 0.180 | 87% | 7.708   | 10%  | 77.786  | <0.001 | 1.688 | 0.194 |

|               |      |                                              |     |    |        |       |        |       |       |     |        |      |         |        |        |       |
|---------------|------|----------------------------------------------|-----|----|--------|-------|--------|-------|-------|-----|--------|------|---------|--------|--------|-------|
| Min GT        | 2018 | Hepatocellular                               | RFS | 16 | -0.315 | 0.341 | 0.324  | 0.004 | 0.087 | 74% | 3.809  | 38%  | 44.743  | <0.001 | 8.134  | 0.004 |
| Liu L         | 2019 | Hepatocellular (Sorfenib)                    | OS  | 11 | -0.079 | 0.864 | 0.196  | 0.180 | 0.032 | 45% | 1.819  | 26%  | 16.506  | 0.057  | 1.800  | 0.180 |
| Wang Y        | 2018 | Hepatocellular (SR)                          | OS  | 13 | 0.532  | 0.131 | -0.020 | 0.881 | 0.023 | 36% | 1.562  | 0%   | 17.045  | 0.107  | 0.022  | 0.881 |
| Wang Y        | 2018 | Hepatocellular (SR)                          | DFS | 7  | 0.245  | 0.367 | 0.063  | 0.536 | 0.001 | 5%  | 1.058  | 0%   | 8.160   | 0.148  | 0.383  | 0.536 |
| Li S          | 2020 | Hepatocellular (TACE)                        | OS  | 16 | 0.626  | 0.001 | -0.003 | 0.961 | 0.025 | 43% | 1.768  | 0%   | 28.035  | 0.014  | 0.002  | 0.961 |
| Yang L        | 2019 | Hypopharynx                                  | OS  | 3  | 0.835  | 0.261 | 0.080  | 0.758 | 0     | 0%  | 1      | 0%   | 0.853   | 0.356  | 0.095  | 0.758 |
| Tan Q         | 2018 | Immunotherapy (Immune checkpoint inhibitors) | OS  | 18 | 0.729  | 0.409 | 0.016  | 0.934 | 0.215 | 78% | 4.550  | 0%   | 86.955  | <0.001 | 0.007  | 0.934 |
| Tan Q         | 2018 | Immunotherapy (Immune checkpoint inhibitors) | PFS | 11 | -0.189 | 0.827 | 0.161  | 0.386 | 0.085 | 68% | 3.139  | 7%   | 31.583  | <0.001 | 0.753  | 0.386 |
| Xie X         | 2019 | Ipilimumab                                   | OS  | 6  | -3.358 | 0.131 | 0.923  | 0.051 | 0.243 | 82% | 5.696  | 43%  | 19.012  | 0.001  | 3.794  | 0.051 |
| Yang L        | 2019 | Larynx                                       | DFS | 3  | -0.924 | 0.315 | 0.721  | 0.178 | 0     | 0%  | 1      | 100% | 0.027   | 0.870  | 1.810  | 0.178 |
| Mascarella M  | 2018 | Larynx                                       | OS  | 6  | 0.419  | 0.746 | 0.025  | 0.958 | 0.034 | 30% | 1.420  | 0%   | 5.444   | 0.245  | 0.003  | 0.958 |
| Zhao QT       | 2015 | Lung                                         | OS  | 21 | 0.492  | 0.150 | -0.013 | 0.873 | 0.090 | 88% | 8.251  | 0%   | 101.987 | <0.001 | 0.025  | 0.873 |
| Zhao QT       | 2015 | Lung                                         | PFS | 9  | 1.480  | 0.044 | -0.280 | 0.107 | 0.140 | 80% | 5.064  | 16%  | 36.750  | <0.001 | 2.593  | 0.107 |
| Yu Y          | 2017 | Lung Surgery                                 | OS  | 7  | 0.464  | 0.196 | -0.017 | 0.873 | 0.050 | 79% | 4.770  | 0%   | 26.900  | <0.001 | 0.026  | 0.873 |
| Zhan H        | 2018 | Melanoma                                     | OS  | 10 | -0.091 | 0.831 | 0.156  | 0.178 | 0.098 | 90% | 10.282 | 7%   | 91.782  | <0.001 | 1.812  | 0.178 |
| Ding Y        | 2018 | Melanoma                                     | PFS | 6  | 1.044  | 0.104 | -0.053 | 0.701 | 0.011 | 13% | 1.146  | 0    | 3.721   | 0.445  | 0.148  | 0.701 |
| Xie X         | 2019 | Melanoma (Immune checkpoint inhibitors)      | OS  | 8  | -3.395 | 0.056 | 0.916  | 0.015 | 0.149 | 72% | 3.622  | 52%  | 19.482  | 0.003  | 5.930  | 0.015 |
| Chen          | 2017 | MPM                                          | OS  | 10 | -0.050 | 0.937 | 0.108  | 0.475 | 0.130 | 82% | 5.520  | 0%   | 36.158  | <0.001 | 0.510  | 0.475 |
| Zeng Q        | 2018 | Multiple Myeloma                             | OS  | 8  | 0.054  | 0.915 | 0.195  | 0.325 | 0.088 | 65% | 2.847  | 3%   | 20.715  | 0.002  | 0.969  | 0.325 |
| Zeng Q        | 2018 | Multiple Myeloma                             | PFS | 4  | 0.078  | 0.930 | 0.207  | 0.542 | 0.278 | 94% | 15.956 | 0%   | 16.072  | <0.001 | 0.371  | 0.542 |
| Li X          | 2018 | NAC                                          | OS  | 18 | -0.127 | 0.756 | 0.198  | 0.121 | 0.086 | 82% | 5.693  | 22%  | 58.956  | <0.001 | 2.410  | 0.121 |
| Li X          | 2018 | NAC                                          | RFS | 7  | 0.379  | 0.761 | 0.133  | 0.784 | 0.103 | 47% | 1.882  | 0%   | 9.038   | 0.108  | 0.075  | 0.784 |
| Li X          | 2018 | NAC                                          | CSS | 5  | 0.574  | 0.481 | 0.077  | 0.755 | 0.250 | 66% | 2.924  | 0%   | 9.322   | 0.025  | 0.097  | 0.755 |
| Yin J         | 2017 | Nasopharngal                                 | PFS | 5  | 0.454  | 0.146 | -0.009 | 0.920 | 0.012 | 27% | 1.374  | 0%   | 3.651   | 0.302  | 0.010  | 0.920 |
| Yang S        | 2019 | Nasopharyngeal                               | OS  | 10 | 0.030  | 0.908 | 0.115  | 0.179 | 0     | 0%  | 1.000  | 100% | 8.099   | 0.424  | 1.804  | 0.179 |
| Su L          | 2017 | Nasopharyngeal                               | CSS | 3  | -0.226 | 0.657 | 0.213  | 0.251 | 0     | 0%  | 1.000  | 100% | 0.149   | 0.699  | 1.319  | 0.251 |
| Xie X         | 2019 | Nivolumab                                    | OS  | 6  | -1.433 | 0.268 | 0.501  | 0.061 | 0.039 | 20% | 1.257  | 53%  | 4.197   | 0.380  | 3.521  | 0.061 |
| Xie X         | 2019 | Nivolumab                                    | PFS | 8  | -0.829 | 0     | 0.294  | 0     | 0     | 0%  | 1.000  | 100% | 4.432   | 0.618  | 48.012 | 0     |
| Vartolomei MD | 2018 | Non muscle Invasive Bladder                  | RFS | 6  | -0.614 | 0.567 | 0.483  | 0.263 | 0.074 | 64% | 2.780  | 0%   | 14.030  | 0.007  | 1.251  | 0.263 |
| Vartolomei MD | 2018 | Non muscle Invasive Bladder                  | PFS | 6  | -0.180 | 0.861 | 0.403  | 0.320 | 0.037 | 18% | 1.222  | 0%   | 3.282   | 0.512  | 0.990  | 0.320 |
| Vartolomei MD | 2018 | Non muscle Invasive Bladder (High Risk)      | RFS | 4  | 3.429  | 0.409 | -0.986 | 0.536 | 0.318 | 68% | 3.172  | 0%   | 6.952   | 0.031  | 0.383  | 0.536 |
| Vartolomei MD | 2018 | Non-muscle Invasive Bladder (High Risk)      | PFS | 3  | -3.141 | 0.397 | 1.574  | 0.271 | 0     | 0%  | 1.000  | NA   | 0.554   | 0.457  | 1.214  | 0.271 |
| Lu Y          | 2020 | NSCLC                                        | OS  | 21 | 0.604  | 0.016 | -0.070 | 0.287 | 0.041 | 70% | 3.346  | 4%   | 52.946  | <0.001 | 1.133  | 0.287 |
| Gu XB         | 2015 | NSCLC                                        | PFS | 10 | 0.448  | 0.410 | 0.006  | 0.964 | 0.074 | 67% | 2.995  | 0%   | 28.495  | <0.001 | 0.002  | 0.964 |
| Wang Z        | 2019 | NSCLC (Chemotherapy)                         | OS  | 8  | 1.576  | 0.009 | -0.279 | 0.102 | 0.128 | 69% | 3.206  | 27%  | 15.889  | 0.014  | 2.671  | 0.102 |

|                   |      |                                      |     |    |        |       |        |       |       |     |        |      |         |        |        |        |
|-------------------|------|--------------------------------------|-----|----|--------|-------|--------|-------|-------|-----|--------|------|---------|--------|--------|--------|
| Wang Z            | 2019 | NSCLC (Chemotherapy)                 | PFS | 5  | 2.193  | 0.053 | -0.558 | 0.141 | 0.005 | 10% | 1.117  | 77%  | 2.914   | 0.405  | 2.162  | 0.141  |
| Xie X             | 2019 | NSCLC (Immune Checkpoint Inhibitors) | PFS | 6  | -0.676 | 0.001 | 0.243  | 0     | 0     | 0%  | 1.000  | 100% | 2.392   | 0.664  | 15.231 | 0      |
| Wang Z            | 2019 | NSCLC (Immunotherapy)                | OS  | 7  | 0.969  | 0.546 | -0.030 | 0.922 | 0.214 | 76% | 4.107  | 0    | 24.418  | 0      | 0.010  | 0.922  |
| Cao D             | 2018 | NSCLC (Nivoumab)                     | OS  | 8  | -0.484 | 0     | 0.204  | 0     | 0     | 0%  | 1.000  | 100% | 8.870   | 0.181  | 46.698 | 0      |
| Cao D             | 2018 | NSCLC (Nivoumab)                     | PFS | 10 | -0.390 | 0.674 | 0.185  | 0.376 | 0     | 93% | 15.012 | 0%   | 56.851  | <0.001 | 0.783  | 0.376  |
| Jiang T           | 2019 | NSCLC (PD-1 inhibitor)               | OS  | 13 | -0.235 | 0.541 | 0.273  | 0.003 | 0     | 0%  | 1.000  | 100% | 6.690   | 0.824  | 8.686  | 0.003  |
| Jiang T           | 2019 | NSCLC (PD-1 inhibitor)               | PFS | 12 | 0.374  | 0.346 | 0.027  | 0.768 | 0     | 0%  | 1.000  | 0%   | 3.447   | 0.969  | 0.087  | 0.768  |
| Wang Z            | 2019 | NSCLC (ST)                           | OS  | 22 | 0.432  | 0.216 | 0.049  | 0.562 | 0.151 | 91% | 10.731 | 0%   | 109.798 | <0.001 | 0.337  | 0.562  |
| Wang Z            | 2019 | NSCLC (ST)                           | PFS | 15 | 0.350  | 0.196 | 0.011  | 0.880 | 0.055 | 80% | 4.994  | 0%   | 53.719  | <0.001 | 0.023  | 0.880  |
| Wang Z            | 2019 | NSCLC (TT)                           | OS  | 5  | -0.590 | 0.099 | 0.345  | 0.005 | 0.022 | 17% | 1.201  | 86%  | 2.967   | 0.397  | 7.915  | 0.005  |
| Wang Z            | 2019 | NSCLC (TT)                           | PFS | 5  | -1.163 | 0     | 0.565  | 0     | 0     | 0%  | 1.000  | 100% | 1.916   | 0.590  | 14.148 | 0      |
| Zhang X           | 2018 | Oesophageal                          | OS  | 26 | 0.206  | 0.294 | 0.064  | 0.280 | 0.068 | 75% | 4.055  | 5%   | 83.809  | <0.001 | 1.168  | 0.280  |
| Zhang X           | 2018 | Oesophageal                          | CSS | 7  | 0.082  | 0.859 | 0.096  | 0.540 | 0.060 | 58% | 2.389  | 0%   | 12.236  | 0.032  | 0.375  | 0.540  |
| Zhang X           | 2018 | Oesophageal                          | RFS | 3  | 1.440  | 0.008 | -0.352 | 0.071 | 0     | 0%  | 1.000  | 100% | 0.108   | 0.742  | 3.249  | 0.071  |
| Zhang X           | 2018 | Oesophageal                          | DFS | 10 | -0.251 | 0.566 | 0.202  | 0.094 | 0.114 | 81% | 5.317  | 27%  | 37.388  | <0.001 | 2.798  | 0.094  |
| Zhang X           | 2018 | Oesophageal                          | PFS | 4  | 0.300  | 0.486 | 0.018  | 0.867 | 0     | 27% | 1.374  | 0%   | 2.267   | 0.322  | 0.028  | 0.867  |
| Zhang X           | 2018 | Oesophageal (No Surgery)             | OS  | 4  | 0.278  | 0.616 | 0.071  | 0.607 | 0.070 | 58% | 2.398  | 0%   | 4.809   | 0.090  | 0.264  | 0.607  |
| Zhang X           | 2018 | Oesophageal (Surgery)                | OS  | 21 | 0.243  | 0.305 | 0.052  | 0.492 | 0.086 | 79% | 4.841  | 0%   | 76.621  | <0.001 | 0.471  | 0.492  |
| Zhang X           | 2018 | Oesophageal SCC                      | OS  | 19 | 0.378  | 0.087 | -0.016 | 0.817 | 0.053 | 67% | 3.046  | 0%   | 56.070  | <0.001 | 0.053  | 0.817  |
| Yang Y            | 2018 | Oral cavity                          | OS  | 9  | -0.316 | 0.618 | 0.348  | 0.174 | 0     | 27% | 1.366  | 38%  | 9.188   | 0.239  | 1.851  | 0.174  |
| Yang Y            | 2018 | Oral cavity                          | DFS | 10 | 0.513  | 0.320 | 0.013  | 0.949 | 0     | 0%  | 1.000  | 100% | 8.501   | 0.386  | 0.004  | 0.949  |
| Wang Y            | 2018 | Oral SCC                             | OS  | 5  | -1.195 | 0.198 | 0.679  | 0.076 | 0     | 0%  | 1.000  | 100% | 1.231   | 0.746  | 3.143  | 0.076  |
| Wang Y            | 2018 | Oral SCC                             | DFS | 6  | 0.527  | 0.411 | 0.052  | 0.831 | 0     | 0%  | 1.000  | 33%  | 3.418   | 0.490  | 0.046  | 0.831  |
| Zhou Q            | 2017 | Ovarian                              | PFS | 12 | -0.315 | 0.515 | 0.234  | 0.104 | 0.099 | 83% | 5.926  | 9%   | 62.107  | <0.001 | 2.648  | 0.104  |
| Zhou Q            | 2017 | Ovarian                              | OS  | 16 | -0.300 | 0.597 | 0.236  | 0.154 | 0.152 | 84% | 6.427  | 10%  | 73.819  | <0.001 | 2.027  | 0.154  |
| Zhou Y            | 2018 | Pancreatic                           | OS  | 43 | 0.311  | 0.142 | 0.075  | 0.169 | 0.112 | 80% | 4.994  | 6%   | 176.759 | <0.001 | 1.893  | 0.169  |
| Zhou Y            | 2018 | Pancreatic                           | DFS | 8  | 1.641  | 0.064 | -0.250 | 0.189 | 0.143 | 63% | 2.682  | 18%  | 15.204  | 0.019  | 1.723  | 0.189  |
| Yang JJ           | 2015 | Pancreatic                           | CSS | 3  | -0.204 | 0.680 | 0.182  | 0.141 | 0.051 | 50% | 1.994  | 51%  | 1.994   | 0.158  | 2.163  | 0.141  |
| Mowbray N         | 2018 | Pancreatic (SR)                      | OS  | 8  | 0.369  | 0.083 | 0.060  | 0.384 | 0     | 0%  | 1.000  | 0%   | 9.395   | 0.153  | 0.759  | 0.384  |
| Guo J             | 2018 | Prostate                             | PFS | 7  | 0.948  | 0.103 | -0.073 | 0.641 | 0.064 | 37% | 1.588  | 0%   | 7.911   | 0.161  | 0.218  | 0.641  |
| Guo J             | 2018 | Prostate (Metastatic)                | OS  | 9  | 0.949  | 0.024 | -0.126 | 0.290 | 0.035 | 43% | 1.758  | 0%   | 12.582  | 0.083  | 1.118  | 0.290  |
| Yin X             | 2016 | Prostate CR                          | OS  | 8  | 0.763  | 0.002 | -0.088 | 0.194 | 0.001 | 2%  | 1.021  | 0%   | 6.864   | 0.334  | 1.689  | 0.194  |
| Guan Y            | 2020 | Prostate CR (Abitaterone)            | OS  | 10 | 0.375  | 0.357 | 0.053  | 0.632 | 0.046 | 48% | 1.906  | 0%   | 14.941  | 0.060  | 0.230  | 0.632  |
| Guan Y            | 2020 | Prostate CR (Enzalutamide)           | OS  | 5  | 1.003  | 0.351 | -0.210 | 0.579 | 0     | 78% | 4.600  | 0%   | 9.366   | 0.025  | 0.309  | 0.579  |
| Dong YW           | 2016 | Rectal                               | OS  | 6  | 0.458  | 0.862 | 0.733  | 0.390 | 0     | 0%  | 1.000  | NA   | 1.042   | 0.903  | 0.739  | 0.390  |
| Dong YW           | 2016 | Rectal                               | DFS | 3  | -2.146 | 0.573 | 1.256  | 0.341 | 0     | 0%  | 1.000  | NA   | 0.004   | 0.953  | 0.905  | 0.341  |
| Dong YW           | 2016 | Rectal                               | RFS | 3  | 0.683  | 0.734 | 0.170  | 0.760 | 0     | 0%  | 1.000  | NA   | 0.667   | 0.414  | 0.094  | 0.760  |
| Na N              | 2016 | Renal                                | PFS | 7  | 0.954  | 0.531 | -0.090 | 0.867 | 0.197 | 82% | 5.558  | 0%   | 47.577  | <0.001 | 0.028  | 0.867  |
| Luo Y             | 2015 | Renal                                | OS  | 13 | 0.607  | 0.196 | 0.016  | 0.906 | 0.041 | 46% | 1.865  | 0%   | 18.121  | 0.079  | 0.014  | 0.906  |
| Luo Y             | 2015 | Renal                                | CSS | 4  | -1.165 | 0     | 0.476  | 0     | 0     | 0%  | 1.000  | 100% | 0.594   | 0.743  | 21.326 | <0.001 |
| Luo Y             | 2015 | Renal                                | RFS | 3  | 1.425  | 0.068 | -0.184 | 0.325 | 0.003 | 2%  | 1.020  | 53%  | 1.020   | 0.313  | 0.967  | 0.325  |
| Semeniuk-Wojtas A | 2018 | Renal (TKI)                          | OS  | 7  | 0.020  | 0.975 | 0.243  | 0.238 | 0.040 | 35% | 1.535  | 17%  | 6.487   | 0.262  | 1.392  | 0.238  |
| Semeniuk-Wojtas A | 2018 | Renal (TKI)                          | PFS | 6  | 1.101  | 0.513 | -0.145 | 0.810 | 0.250 | 85% | 6.485  | 0%   | 41.803  | <0.001 | 0.058  | 0.810  |
| Boissier R        | 2017 | Renal Advanced                       | OS  | 6  | -0.395 | 0.729 | 0.381  | 0.315 | 0.065 | 55% | 2.198  | 0%   | 9.634   | 0.047  | 1.011  | 0.315  |

|               |      |                                 |     |    |        |       |        |       |       |     |        |      |        |        |       |       |
|---------------|------|---------------------------------|-----|----|--------|-------|--------|-------|-------|-----|--------|------|--------|--------|-------|-------|
| Boissier R    | 2017 | Renal Advanced                  | PFS | 3  | -7.802 | 0.811 | 2.979  | 0.784 | 0     | 0%  | 1.000  | NA   | 0.424  | 0.515  | 0.075 | 0.784 |
| Boissier R    | 2017 | Renal Localised                 | OS  | 3  | 1.311  | 0.449 | -0.218 | 0.603 | 0.306 | 87% | 7.693  | 0%   | 7.693  | 0.006  | 0.270 | 0.603 |
| Boissier R    | 2017 | Renal Localised                 | RFS | 6  | 1.264  | 0.106 | -0.221 | 0.321 | 0.174 | 81% | 5.225  | 0%   | 18.851 | 0.001  | 0.985 | 0.321 |
| Li LQ         | 2020 | STS                             | DFS | 7  | 0.323  | 0.158 | 0.089  | 0.291 | 0     | 0%  | 1.000  | 0%   | 3.531  | 0.619  | 1.113 | 0.291 |
| Liu G         | 2018 | STS                             | OS  | 13 | 0.749  | 0.044 | -0.117 | 0.394 | 0     | 66% | 2.911  | 7%   | 45.486 | <0.001 | 0.725 | 0.394 |
| Feng J        | 2020 | Thyroid                         | DFS | 7  | 3.210  | 0.153 | -1.249 | 0.244 | 0.618 | 73% | 3.725  | 0%   | 17.568 | 0.004  | 1.356 | 0.244 |
| Wei Y         | 2014 | Urinary                         | OS  | 12 | 1.023  | 0.010 | -0.102 | 0.345 | 0.079 | 52% | 2.074  | 0%   | 20.471 | 0.025  | 0.894 | 0.345 |
| Su S          | 2019 | Urothelial                      | OS  | 7  | 1.332  | 0.004 | -0.578 | 0.015 | 0     | 0%  | 1.000  | 100% | 7.176  | 0.208  | 5.864 | 0.015 |
| Vartolomei MD | 2018 | Urothelial                      | RFS | 6  | 1.725  | 0.403 | -0.444 | 0.549 | 0.116 | 68% | 3.096  | 0%   | 13.830 | 0.008  | 0.359 | 0.549 |
| Suh J         | 2019 | Urothelial (Chemotherapy)       | OS  | 5  | 0.439  | 0.197 | -0.016 | 0.863 | 0.013 | 48% | 1.925  | 0%   | 5.661  | 0.129  | 0.030 | 0.863 |
| Suh J         | 2019 | Urothelial (Nephroureterectomy) | OS  | 3  | 1.816  | 0.271 | -0.422 | 0.439 | 0     | 0%  | 1.000  | 0%   | 0.940  | 0.332  | 0.600 | 0.439 |
| Suh J         | 2019 | Urothelial (Nephroureterectomy) | PFS | 8  | 1.151  | 0.069 | -0.230 | 0.285 | 0.095 | 65% | 2.852  | 0%   | 17.185 | 0.009  | 1.143 | 0.285 |
| Suh J         | 2019 | Urothelial (Radical Cystectomy) | CSS | 8  | 0.627  | 0.316 | -0.042 | 0.833 | 0.122 | 89% | 9.288  | 0%   | 57.670 | <0.001 | 0.045 | 0.833 |
| Suh J         | 2019 | Urothelial (Radical Cystectomy) | OS  | 8  | 0.677  | 0.352 | -0.034 | 0.881 | 0.185 | 91% | 10.918 | 0%   | 48.548 | <0.001 | 0.022 | 0.881 |
| Suh J         | 2019 | Urothelial (Radical Cystectomy) | PFS | 4  | 0.964  | 0.538 | -0.225 | 0.666 | 0.110 | 85% | 6.504  | 0%   | 11.251 | 0.004  | 0.186 | 0.666 |

N=number of component studies with in review, (NA) Not applicable, (T) True, (F) False, (HR) Hazard ratio, (NLR) Neutrophil to lymphocyte ratio, (IN) Intratumoural neutrophils, (PN) Peritumoural neutrophils, (SN) Stromal Neutrophils, (OS) Overall Survival, (DFS) Disease-Free Survival, (PFS) Progression-Free Survival, (RFS) Reoccurrence-Free Survival, (CSS) Cancer Specific Survival, (VEGFR) Vascular Endothelial Growth Factor Receptor, (PC) Palliative Chemotherapy, (SBR) Surgical Bowel Resection, (NAC) Neoadjuvant Chemotherapy, (STS) Soft Tissue Sarcoma, (UTR) Urothelial Transurethral Resection, (SR) Surgical Resection, (GNT) Gastroenteropancreatic Neuroendocrine Tumors, (SCC) Squamous Cell Carcinoma, (ST) Systematic Therapy, (MT) Mixed Therapy, (TT) Targeted Therapy, (CLM) Colorectal Liver Metastasis, (NS) Non-surgical, (ICC) Intrahepatic Cholangiocarcinoma, (RFA) Radiofrequency Ablation, (TACE) Trans-Arterial Chemoembolization, (MPM) Malignant Pleural Mesothelioma, (NSCLC) Non-Small Cell Lung Cancer, (NHC), Neck and Head Cancer, (UTUC) Upper Tract Urothelial Carcinoma, (DCRT) Definitive Chemoradiotherapy, (CR) Castration Resistant, (TKI) Tyrosine Kinase Inhibitor.

\*All-cancers are defined as a grouping of cancer diagnosis unrelated to site, stage or treatment unless otherwise specified.

†review reported incomplete data on sample size.

## Appendix H: Excess significance in included meta-analyses

| Author         | Year | Biomarker | Cancer site                          | meta-analysis metric | N   | Sample size | Largest Study Effect Size |    |           | Fixed Effects Size |    |           | Random Effects Size |     |           | Largest Study O > E | Bias (Largest) |
|----------------|------|-----------|--------------------------------------|----------------------|-----|-------------|---------------------------|----|-----------|--------------------|----|-----------|---------------------|-----|-----------|---------------------|----------------|
|                |      |           |                                      |                      |     |             | O                         | E  | P-val     | O                  | E  | P-val     | O                   | E   | P-val     |                     |                |
| Jiang T        | 2018 | NLR       | Advanced Cancer (Anti-VEGFR)         | OS                   | 14  | 2918        | 13                        | 13 | NA        | 13                 | 9  | 0.0252    | 13                  | 13  | NA        | NA                  | No             |
| Jiang T        | 2018 | NLR       | Advanced Cancer (Immunotherapy)      | PFS                  | 16  | 2318        | 13                        | 10 | 0.1947    | 13                 | 4  | 3.78E-06  | 13                  | 13  | NA        | TRUE                | None Detected  |
| Mei Z          | 2017 | NLR       | Composite endpoints                  | OS                   | 65  | 18262       | 59                        | 26 | <0.0001   | 59                 | 8  | 2.20E-16  | 59                  | 57  | 0.572     | TRUE                | Yes            |
| Mei Z          | 2017 | NLR       | Composite endpoints                  | PFS                  | 23  | 5607        | 19                        | 21 | NA        | 19                 | 9  | 3.61E-05  | 19                  | 20  | NA        | FALSE               | No             |
| Shen M         | 2014 | IN        | Composite endpoints                  | OS                   | 16  | 3335        | 10                        | 3  | 0.0001    | 10                 | 11 | NA        | 10                  | 13  | NA        | TRUE                | Yes            |
| Shen M         | 2014 | IN        | Composite endpoints                  | CSS                  | 2   | 437         | 2                         | 2  | NA        | 2                  | 2  | NA        | 2                   | 2   | NA        | NA                  | No             |
| Paramanathan A | 2014 | NLR       | Composite endpoints                  | DFS                  | 20  | 13065       | 17                        | 8  | 8.39E-05  | 17                 | 12 | 0.0224    | 17                  | 20  | NA        | TRUE                | Yes            |
| Shen M         | 2014 | PN        | Composite endpoints                  | OS                   | 2   | 535         | 1                         | 0  | <0.0001   | 1                  | 1  | NA        | 1                   | 2   | NA        | TRUE                | Yes            |
| Shen M         | 2014 | PN        | Composite endpoints                  | OS                   | 2   | 535         | 0                         | 0  | NA        | 0                  | 0  | NA        | 0                   | 0   | NA        | NA                  | No (NM)        |
| Dolan R        | 2017 | NLR       | Composite endpoints Operable         | OS                   | 120 | 68603       | 84                        | 67 | 0.0017    | 84                 | 48 | 3.58E-11  | 84                  | 116 | NA        | TRUE                | Yes            |
| Dolan R        | 2017 | NLR       | Composite endpoints Operable         | CSS                  | 41  | 21175       | 28                        | 7  | 5.44E-13  | 28                 | 4  | 2.20E-16  | 28                  | 37  | NA        | TRUE                | Yes            |
| Tang H         | 2017 | NLR       | Biliary Tract                        | OS                   | 14  | 3217        | 10                        | 5  | 0.0092    | 10                 | 9  | 0.7819    | 10                  | 9   | 0.7819    | TRUE                | Yes            |
| Tang H         | 2017 | NLR       | Biliary Tract                        | RFS                  | 5   | 637         | 3                         | 1  | 0.0579    | 3                  | 2  | 0.3952    | 3                   | 2   | 0.3952    | TRUE                | Yes            |
| Hu G           | 2019 | NLR       | Bladder                              | OS                   | 18  | 11945       | 13                        | 3  | 2.84E-07  | 13                 | 2  | 1.96E-09  | 13                  | 11  | 0.4695    | TRUE                | Yes            |
| Wu S           | 2018 | NLR       | Bladder                              | RFS                  | 9   | 8075        | 9                         | 5  | 0.0057    | 9                  | 6  | 0.0343    | 9                   | 8   | 0.6103    | TRUE                | Yes            |
| Wu S           | 2018 | NLR       | Bladder (Metastasis)                 | OS                   | 4   | 862         | 3                         | 4  | NA        | 3                  | 4  | NA        | 3                   | 4   | NA        | FALSE               | No             |
| Hu G           | 2019 | NLR       | Bladder (Radical Cystectomy and NAC) | OS                   | 4   | 447         | 1                         | 0  | < 2.2e-16 | 1                  | 0  | < 2.2e-16 | 1                   | 0   | < 2.2e-16 | TRUE                | No (NM)        |
| Hu G           | 2019 | NLR       | Bladder (Radical Cystectomy)         | OS                   | 8   | 10363       | 7                         | 3  | 0.0056    | 7                  | 1  | 3.40E-06  | 7                   | 3   | 0.006     | TRUE                | Yes            |
| Suh J          | 2019 | NLR       | Bladder (UTR)                        | PFS                  | 4   | 1040        | 2                         | 4  | < 2.2e-16 | 2                  | 4  | < 2.2e-16 | 2                   | 4   | < 2.2e-16 | FALSE               | No             |
| Suh J          | 2019 | NLR       | Bladder (UTR)                        | RFS                  | 5   | 1129        | 5                         | 5  | NA        | 5                  | 5  | NA        | 5                   | 5   | NA        | NA                  | No             |
| Li X           | 2017 | NLR       | Bladder and Upper Urinary            | PFS                  | 19  | 8182        | 12                        | 1  | 1.61E-11  | 12                 | 15 | NA        | 12                  | 17  | NA        | TRUE                | Yes            |
| Li X           | 2017 | NLR       | Bladder and Upper Urinary            | CSS                  | 17  | 7645        | 13                        | 2  | 1.24E-09  | 13                 | 12 | 0.7916    | 13                  | 16  | NA        | TRUE                | Yes            |
| Ethier JL      | 2017 | NLR       | Breast                               | OS                   | 13  | 8015        | 13                        | 12 | 0.6173    | 13                 | 13 | NA        | 13                  | 13  | NA        | TRUE                | None Detected  |
| Liu X          | 2017 | NLR       | Breast                               | DFS                  | 12  | 5523        | 7                         | 9  | NA        | 7                  | 1  | 1.52E-05  | 7                   | 10  | NA        | FALSE               | No             |
| Liu X          | 2017 | NLR       | Breast                               | CSS                  | 4   | 4186        | 2                         | 1  | 0.2617    | 2                  | 2  | NA        | 2                   | 4   | NA        | TRUE                | None Detected  |
| Chen J         | 2018 | NLR       | Breast (Metastasis)                  | OS                   | 2   | 858         | 2                         | 2  | NA        | 2                  | 2  | NA        | 2                   | 2   | NA        | NA                  | No             |
| Chen J         | 2018 | NLR       | Breast (Metastasis)                  | DFS                  | 3   | 1003        | 2                         | 3  | NA        | 2                  | 3  | NA        | 2                   | 3   | NA        | FALSE               | No             |



|             |      |     |                                            |     |    |       |    |    |           |    |    |           |    |    |           |       |               |
|-------------|------|-----|--------------------------------------------|-----|----|-------|----|----|-----------|----|----|-----------|----|----|-----------|-------|---------------|
| Chen J      | 2018 | NLR | Breast (No Metastasis)                     | OS  | 2  | 488   | 1  | 1  | NA        | 1  | 2  | NA        | 1  | 2  | NA        | NA    | No            |
| Chen J      | 2018 | NLR | Breast (No Metastasis)                     | DFS | 2  | 466   | 0  | 1  | NA        | 0  | 0  | NA        | 0  | 0  | NA        | FALSE | No            |
| Duan J      | 2018 | NLR | Breast (SR)                                | DFS | 15 | 7820  | 9  | 15 | < 2.2e-16 | 9  | 3  | 0.0008    | 9  | 14 | 0.0003    | FALSE | No            |
| Duan J      | 2018 | NLR | Breast (SR)                                | OS  | 12 | 6233  | 10 | 12 | < 2.2e-16 | 10 | 12 | < 2.2e-16 | 10 | 12 | < 2.2e-16 | FALSE | No            |
| Duan J      | 2018 | NLR | Breast (SR)                                | RFS | 2  | 319   | 2  | 2  | NA        | 2  | 2  | NA        | 2  | 2  | NA        | NA    | No            |
| Guo W       | 2019 | NLR | Breast (Triple Negative and Her2 Positive) | DFS | 27 | 11369 | 15 | 22 | 0.0018    | 15 | 23 | 0.0002    | 15 | 24 | 1.23E-05  | FALSE | No            |
|             |      | NLR | Breast (Triple Negative and Her2 Positive) | OS  | 28 | 14128 | 18 | 1  | < 2.2e-16 | 18 | 22 | 0.1022    | 18 | 25 | 0.0004    | TRUE  | None Detected |
| Liu X       | 2017 | NLR | Breast (Triple-negative)                   | OS  | 4  | 608   | 3  | 4  | NA        | 3  | 4  | NA        | 3  | 4  | NA        | FALSE | No            |
| Liu X       | 2017 | NLR | Breast (Triple-negative)                   | DFS | 4  | 461   | 3  | 4  | NA        | 3  | 4  | NA        | 3  | 4  | NA        | FALSE | No            |
| Wu J        | 2017 | NLR | Cervical                                   | OS  | 12 | 3661  | 5  | 4  | 0.5496    | 5  | 4  | 0.5496    | 5  | 7  | NA        | TRUE  | None Detected |
| Wu J        | 2017 | NLR | Cervical                                   | PFS | 10 | 2452  | 7  | 1  | 9.12E-06  | 7  | 2  | 0.0009    | 7  | 7  | NA        | TRUE  | Yes           |
| Zhang J     | 2017 | NLR | Colorectal                                 | DFS | 5  | 2178  | 2  | 3  | NA        | 2  | 5  | NA        | 2  | 5  | NA        | FALSE | No            |
| Zheng DC    | 2016 | NLR | Colorectal                                 | OS  | 21 | 7927  | 13 | 11 | 0.5133    | 13 | 17 | NA        | 13 | 20 | NA        | TRUE  | None Detected |
| Zheng DC    | 2016 | NLR | Colorectal                                 | PFS | 14 | 3662  | 9  | 13 | NA        | 9  | 12 | NA        | 9  | 13 | NA        | FALSE | No            |
| Malietzis G | 2014 | NLR | Colorectal (PC)                            | DFS | 3  | 515   | 2  | 2  | NA        | 2  | 2  | NA        | 2  | 2  | NA        | NA    | No            |
| Li H        | 2019 | NLR | Colorectal (SR)                            | DFS | 9  | 4237  | 5  | 5  | NA        | 5  | 8  | 0.01211   | 5  | 9  | < 2.2e-16 | NA    | No            |
| Li H        | 2019 | NLR | Colorectal (SR)                            | OS  | 11 | 4832  | 7  | 7  | NA        | 7  | 10 | 0.01336   | 7  | 10 | 0.0134    | NA    | No            |
| Li H        | 2019 | NLR | Colorectal (SR)                            | RFS | 3  | 643   | 3  | 3  | NA        | 3  | 3  | NA        | 3  | 3  | NA        | NA    | No            |
| Tang H      | 2016 | NLR | CLM                                        | OS  | 7  | 1491  | 7  | 7  | NA        | 7  | 7  | NA        | 7  | 7  | NA        | NA    | No            |
| Tang H      | 2016 | NLR | CLM                                        | RFS | 6  | 1093  | 4  | 6  | NA        | 4  | 6  | NA        | 4  | 6  | NA        | FALSE | No            |
| Tang H      | 2016 | NLR | CLM (Non-surgical)                         | OS  | 2  | 182   | 2  | 2  | NA        | 2  | 2  | NA        | 2  | 2  | NA        | NA    | No            |
| Tang H      | 2016 | NLR | CLM (Non-surgical)                         | RFS | 2  | 190   | 1  | 4  | NA        | 1  | 4  | NA        | 1  | 4  | NA        | FALSE | No            |
| Tang H      | 2016 | NLR | CLM (SR)                                   | OS  | 5  | 1309  | 5  | 5  | NA        | 5  | 5  | NA        | 5  | 5  | NA        | NA    | No            |
| Tang H      | 2016 | NLR | CLM (SR)                                   | RFS | 4  | 903   | 3  | 1  | 0.0508    | 3  | 2  | 0.625     | 3  | 2  | 0.625     | TRUE  | Yes           |
| Ni L        | 2020 | NLR | Endometrial                                | OS  | 9  | 2942  | 6  | 9  | < 2.2e-16 | 6  | 9  | < 2.2e-16 | 6  | 9  | < 2.2e-16 | FALSE | No            |
| Ni L        | 2020 | NLR | Endometrial                                | PFS | 5  | 1798  | 3  | 5  | < 2.2e-16 | 3  | 5  | < 2.2e-16 | 3  | 5  | < 2.2e-16 | FALSE | No            |
| Sun J       | 2016 | NLR | Gastric                                    | OS  | 19 | 5431  | 16 | 14 | 0.4353    | 16 | 18 | NA        | 16 | 18 | NA        | TRUE  | None Detected |
| Sun J       | 2016 | NLR | Gastric                                    | DFS | 7  | 976   | 4  | 5  | NA        | 4  | 5  | NA        | 4  | 5  | NA        | FALSE | No            |
| Shen M      | 2014 | IN  | Gastric                                    | OS  | 2  | 388   | 1  | 2  | NA        | 1  | 0  | < 2.2e-16 | 1  | 1  | NA        | FALSE | No            |
| Zhang X     | 2014 | NLR | Gastric                                    | PFS | 2  | 314   | 2  | 1  | 0.5       | 2  | 1  | 0.5       | 2  | 1  | 0.5       | TRUE  | None Detected |
| Szor D      | 2018 | NLR | Gastric (SR)                               | OS  | 7  | 3223  | 6  | 7  | NA        | 6  | 7  | NA        | 6  | 7  | NA        | FALSE | No            |

|           |      |     |                             |     |    |       |    |    |           |    |    |           |    |    |          |       |               |
|-----------|------|-----|-----------------------------|-----|----|-------|----|----|-----------|----|----|-----------|----|----|----------|-------|---------------|
| Mellor K  | 2018 | NLR | Gastric (SR)                | DFS | 3  | 820   | 1  | 3  | NA        | 1  | 3  | NA        | 1  | 3  | NA       | FALSE | No            |
| Zhou Y    | 2018 | NLR | GNT                         | OS  | 4  | 422   | 4  | 4  | NA        | 4  | 4  | NA        | 4  | 4  | NA       | NA    | No            |
| Zhou Y    | 2018 | NLR | GNT                         | RFS | 3  | 300   | 3  | 3  | NA        | 3  | 3  | NA        | 3  | 3  | NA       | NA    | No            |
| Luo XF    | 2018 | NLR | Gastrointestinal Stromal    | OS  | 2  | 278   | 2  | 0  | < 0.00001 | 2  | 0  | < 2.2e-16 | 2  | 2  | NA       | TRUE  | Yes           |
| Lei Y     | 2019 | NLR | Glioma                      | OS  | 16 | 2275  | 12 | NA | NA        | 12 | 1  | 5.10E-12  | 12 | 10 | 0.4397   | FALSE | No            |
| Ethier JL | 2017 | NLR | Gynecologic                 | OS  | 27 | 10530 | 17 | 15 | 0.5622    | 17 | 12 | 0.0794    | 17 | 23 | NA       | TRUE  | None Detected |
| Yu Y      | 2018 | NLR | Head and Neck               | RFS | 4  | 658   | 2  | 3  | NA        | 2  | 2  | NA        | 2  | 3  | NA       | FALSE | No            |
| Tham T    | 2018 | NLR | Head and Neck               | OS  | 26 | 6769  | 19 | 21 | 0.3201    | 19 | 22 | 0.1058    | 19 | 23 | 0.0246   | FALSE | No            |
| Tham T    | 2018 | NLR | Head and neck               | PFS | 6  | 2173  | 4  | 5  | 0.2632    | 4  | 4  | NA        | 4  | 4  | NA       | FALSE | No            |
| Tham T    | 2018 | NLR | Head and neck               | DFS | 11 | 1692  | 5  | 0  | < 2.2e-16 | 5  | 7  | 0.2232    | 5  | 9  | 0.0072   | TRUE  | No (NM)       |
| Shen M    | 2014 | IN  | Head and Neck               | OS  | 3  | 220   | 1  | 2  | NA        | 1  | 2  | NA        | 1  | 2  | NA       | FALSE | No            |
| Tham T    | 2018 | NLR | Head and Neck (No Surgery)  | OS  | 9  | 3285  | 3  | 8  | 0.0001    | 3  | 7  | 0.0054    | 3  | 7  | 0.0054   | FALSE | No            |
| Yang L    | 2019 | NLR | Head and Neck (SCC)         | CSS | 5  | 1854  | 3  | 3  | NA        | 3  | 4  | 0.2627    | 3  | 4  | 0.2627   | NA    | No            |
| Yang L    | 2019 | NLR | Head and Neck (SCC)         | PFS | 4  | 461   | 2  | 4  | < 2.2e-16 | 2  | 2  | NA        | 2  | 2  | NA       | FALSE | No            |
| Cho J     | 2018 | NLR | Head and Neck (SCC)         | OS  | 24 | 5650  | 17 | 20 | 0.1038    | 17 | 21 | 0.0239    | 17 | 22 | 0.0027   | FALSE | No            |
| Cho J     | 2018 | NLR | Head and Neck (SCC)         | DFS | 12 | 2079  | 7  | 0  | < 2.2e-16 | 7  | 7  | NA        | 7  | 11 | 0.0019   | TRUE  | None Detected |
| Tham T    | 2018 | NLR | Head and Neck (SR)          | OS  | 3  | 707   | 3  | 2  | 0.5556    | 3  | 2  | 0.5556    | 3  | 3  | NA       | TRUE  | None Detected |
| Min GT    | 2018 | NLR | Hepatocellular              | OS  | 44 | 10491 | 33 | 20 | 0.0001    | 33 | 14 | 5.16E-09  | 33 | 36 | NA       | TRUE  | Yes           |
| Min GT    | 2018 | NLR | Hepatocellular              | DFS | 17 | 3881  | 12 | 9  | 0.2235    | 12 | 5  | 0.0005    | 12 | 15 | NA       | TRUE  | None Detected |
| Min GT    | 2018 | NLR | Hepatocellular              | RFS | 16 | 5037  | 12 | 9  | 0.2063    | 12 | 3  | 1.61E-06  | 12 | 3  | 1.61E-06 | TRUE  | None Detected |
| Xiao WK   | 2014 | NLR | Hepatocellular (MT)         | OS  | 3  | 522   | 3  | 2  | 0.5556    | 3  | 3  | NA        | 3  | 3  | NA       | TRUE  | None Detected |
| Xiao WK   | 2014 | NLR | Hepatocellular (RFA)        | OS  | 2  | 370   | 2  | 0  | 2.20E-16  | 2  | 0  | 2.20E-16  | 2  | 0  | 2.20E-16 | TRUE  | Yes           |
| Xiao WK   | 2014 | NLR | Hepatocellular (RFA)        | DFS | 2  | 1054  | 0  | 0  | NA        | 0  | 0  | NA        | 0  | 0  | NA       | NA    | No            |
| Liu L     | 2019 | NLR | Hepatocellular (Sorfenib)   | OS  | 11 | 2324  | 10 | 10 | NA        | 10 | 6  | 0.0154    | 10 | 9  | 0.7013   | NA    | No            |
| Wang Y    | 2018 | NLR | Hepatocellular (SR)         | RFS | 10 | 3404  | 7  | 6  | 0.7492    | 7  | 9  | NA        | 7  | 10 | NA       | TRUE  | None Detected |
| Wang Y    | 2018 | NLR | Hepatocellular (SR)         | OS  | 13 | 4225  | 10 | 7  | 0.1618    | 10 | 11 | 0.4367    | 10 | 11 | 0.4367   | TRUE  | None Detected |
| Wang Y    | 2018 | NLR | Hepatocellular (SR)         | DFS | 7  | 1272  | 7  | 4  | 0.0226    | 7  | 5  | 0.2031    | 7  | 5  | 0.2031   | TRUE  | Yes           |
| Li S      | 2020 | NLR | Hepatocellular (TACE)       | OS  | 16 | 4023  | 15 | 9  | 0.0017    | 15 | 14 | 0.7109    | 15 | 15 | NA       | TRUE  | Yes           |
| Xu ZG     | 2018 | NLR | Hepatocellular (Transplant) | OS  | 8  | 1230  | 6  | 4  | 0.2891    | 6  | 5  | 0.7184    | 6  | 8  | NA       | TRUE  | None Detected |
| Xu ZG     | 2018 | NLR | Hepatocellular (Transplant) | RFS | 4  | 83    | 4  | 4  | NA        | 4  | 4  | NA        | 4  | 4  | NA       | NA    | No            |
| Shen M    | 2014 | IN  | Hepatocellular and ICC      | OS  | 4  | 846   | 3  | 4  | NA        | 3  | 4  | NA        | 3  | 4  | NA       | FALSE | No            |

|               |      |     |                                              |     |    |                 |    |    |           |    |    |           |    |    |           |       |               |
|---------------|------|-----|----------------------------------------------|-----|----|-----------------|----|----|-----------|----|----|-----------|----|----|-----------|-------|---------------|
| Yang L        | 2019 | NLR | Hypopharynx                                  | OS  | 3  | 310             | 3  | 3  | NA        | 3  | 3  | NA        | 3  | 3  | NA        | NA    | No            |
| Jiang T       | 2018 | NLR | Immunotherapy (Advanced Cancer)              | OS  | 23 | 4355            | 20 | 22 | NA        | 20 | 16 | 0.0733    | 20 | 21 | NA        | FALSE | No            |
| Tan Q         | 2018 | NLR | Immunotherapy (Immune checkpoint inhibitors) | OS  | 18 | 1863            | 15 | 15 | NA        | 15 | 1  | < 2.2e-16 | 15 | 16 | NA        | NA    | No            |
| Tan Q         | 2018 | NLR | Immunotherapy (Immune checkpoint inhibitors) | PFS | 11 | 1274            | 9  | 5  | 0.0289    | 9  | 1  | 1.97E-08  | 9  | 8  | 0.738     | TRUE  | Yes           |
| Xie X         | 2019 | NLR | Ipilimumuab                                  | OS  | 7  | 798             | 7  | 6  | 0.6034    | 7  | 1  | 1.21E-06  | 7  | 7  | NA        | TRUE  | None Detected |
| Xie X         | 2019 | NLR | Ipilimumuab                                  | PFS | 3  | 370             | 2  | 0  | < 2.2e-16 | 2  | 3  | < 2.2e-16 | 2  | 3  | < 2.2e-16 | TRUE  | No (NM)       |
| Mu S          | 2018 | NLR | Large B                                      | OS  | 10 | NA <sup>†</sup> | 6  | 2  | 0.0064    | 6  | 8  | NA        | 6  | 8  | NA        | TRUE  | Yes           |
| Mu S          | 2018 | NLR | Large B                                      | PFS | 9  | NA <sup>†</sup> | 4  | 7  | NA        | 4  | 6  | NA        | 4  | 7  | NA        | FALSE | No            |
| Yang L        | 2019 | NLR | Larynx                                       | DFS | 3  | 1260            | 2  | 2  | NA        | 2  | 2  | NA        | 2  | 2  | NA        | NA    | No            |
| Mascarella M  | 2018 | NLR | Larynx                                       | OS  | 6  | 1017            | 4  | 2  | 0.1001    | 4  | 4  | NA        | 4  | 4  | NA        | TRUE  | None Detected |
| Zhao QT       | 2015 | NLR | Lung (both)                                  | OS  | 21 | 6942            | 18 | 17 | 0.7831    | 18 | 7  | 1.10E-06  | 18 | 16 | 0.443     | TRUE  | None Detected |
| Zhao QT       | 2015 | NLR | Lung (both)                                  | PFS | 9  | 1748            | 6  | 7  | NA        | 6  | 3  | 0.0684    | 6  | 5  | 0.7398    | FALSE | No            |
| Yu Y          | 2017 | NLR | Lung (Surgery)                               | OS  | 7  | 2877            | 7  | 6  | 0.6034    | 7  | 3  | 0.0027    | 7  | 6  | 0.6034    | TRUE  | None Detected |
| Zhan H        | 2018 | NLR | Melanoma                                     | OS  | 10 | 4437            | 8  | 5  | 0.1094    | 8  | 2  | 7.79E-05  | 8  | 9  | NA        | TRUE  | None Detected |
| Ding Y        | 2018 | NLR | Melanoma                                     | PFS | 6  | 752             | 5  | 5  | NA        | 5  | 6  | NA        | 5  | 6  | NA        | NA    | No            |
| Xie X         | 2019 | NLR | Melanoma (Immune checkpoint inhibitors)      | OS  | 9  | 1104            | 9  | 8  | 0.6103    | 9  | 1  | 2.58E-09  | 9  | 9  | NA        | TRUE  | None Detected |
| Xie X         | 2019 | NLR | Melanoma (Immune checkpoint inhibitors)      | PFS | 4  | 467             | 4  | 3  | 0.5781    | 4  | 4  | NA        | 4  | 4  | NA        | TRUE  | None Detected |
| Chen          | 2017 | NLR | MPM                                          | OS  | 11 | 1378            | 7  | 0  | 2.20E-16  | 7  | 3  | 0.0126    | 7  | 6  | NA        | TRUE  | Yes           |
| Zeng Q        | 2018 | NLR | Multiple Myeloma                             | OS  | 8  | 1886            | 6  | 8  | < 2.2e-16 | 6  | 1  | 8.52E-05  | 6  | 7  | 0.2637    | FALSE | No            |
| Zeng Q        | 2018 | NLR | Multiple Myeloma                             | PFS | 4  | 1334            | 4  | 4  | NA        | 4  | 0  | < 2.2e-16 | 4  | 4  | NA        | NA    | No            |
| Yang S        | 2019 | NLR | Nasopharyngeal                               | OS  | 10 | 7031            | 7  | 8  | 0.4296    | 7  | 9  | 0.0702    | 7  | 9  | 0.0702    | FALSE | No            |
| Yin J         | 2017 | NLR | Nasopharyngeal                               | PFS | 5  | 4130            | 4  | 4  | NA        | 4  | 5  | NA        | 4  | 5  | NA        | NA    | No            |
| Su L          | 2017 | NLR | Nasopharyngeal                               | CSS | 3  | 2320            | 2  | 2  | NA        | 2  | 2  | NA        | 2  | 2  | NA        | NA    | No            |
| Li X          | 2018 | NLR | NAC                                          | OS  | 18 | 3282            | 13 | 17 | NA        | 13 | 3  | 2.84E-07  | 13 | 14 | NA        | FALSE | No            |
| Li X          | 2018 | NLR | NAC                                          | RFS | 7  | 775             | 6  | 7  | NA        | 6  | 6  | NA        | 6  | 6  | NA        | FALSE | No            |
| Li X          | 2018 | NLR | NAC                                          | CSS | 5  | 971             | 5  | 5  | NA        | 5  | 3  | 0.1648    | 5  | 5  | NA        | NA    | No            |
| Xie X         | 2019 | NLR | Nivolumab                                    | OS  | 6  | 442             | 5  | 5  | NA        | 5  | 5  | NA        | 5  | 6  | < 2.2e-16 | NA    | No            |
| Xie X         | 2019 | NLR | Nivolumab                                    | PFS | 8  | 744             | 6  | 4  | 0.2891    | 6  | 1  | 8.52E-05  | 6  | 4  | 0.2891    | TRUE  | None Detected |
| Vartolomei MD | 2018 | NLR | Non muscle Invasive Bladder                  | RFS | 6  | 2298            | 5  | 3  | 0.2188    | 5  | 5  | NA        | 5  | 6  | NA        | TRUE  | None Detected |
| Vartolomei MD | 2018 | NLR | Non muscle Invasive Bladder                  | PFS | 6  | 2298            | 4  | 5  | NA        | 4  | 6  | NA        | 4  | 6  | NA        | FALSE | No            |

|               |      |     |                                         |     |    |      |    |    |           |    |    |           |    |    |           |       |               |
|---------------|------|-----|-----------------------------------------|-----|----|------|----|----|-----------|----|----|-----------|----|----|-----------|-------|---------------|
| Vartolomei MD | 2018 | NLR | Non muscle Invasive Bladder (High Risk) | RFS | 4  | 599  | 3  | 2  | 0.625     | 3  | 3  | NA        | 3  | 4  | NA        | TRUE  | None Detected |
| Vartolomei MD | 2018 | NLR | Non muscle Invasive Bladder (High Risk) | PFS | 3  | 510  | 2  | 3  | NA        | 2  | 3  | NA        | 2  | 3  | NA        | FALSE | No            |
| Lu Y          | 2020 | NLR | NSCLC                                   | OS  | 21 | 5141 | 15 | 2  | 1.49E-11  | 15 | 10 | 0.0466    | 15 | 14 | 0.8179    | TRUE  | Yes           |
| Gu XB         | 2015 | NLR | NSCLC                                   | PFS | 10 | 2623 | 7  | 5  | 0.3438    | 7  | 1  | 9.12E-06  | 7  | 8  | NA        | TRUE  | None Detected |
| Shen M        | 2014 | IN  | NSCLC                                   | OS  | 2  | 967  | 0  | 1  | NA        | 0  | 1  | NA        | 0  | 1  | NA        | FALSE | No            |
| Wang Z        | 2019 | NLR | NSCLC (Chemotherapy)                    | OS  | 9  | 1276 | 5  | 7  | 0.1178    | 5  | 1  | 0.0014    | 5  | 8  | 0.0121    | FALSE | No            |
| Wang Z        | 2019 | NLR | NSCLC (Chemotherapy)                    | PFS | 5  | 875  | 4  | 2  | 0.0870    | 4  | 4  | NA        | 4  | 4  | NA        | TRUE  | Yes           |
| Xie X         | 2019 | NLR | NSCLC (Immune Checkpoint Inhibitors)    | PFS | 6  | 609  | 4  | 3  | 0.6875    | 4  | 0  | < 2.2e-16 | 4  | 2  | 0.1001    | TRUE  | None Detected |
| Wang Z        | 2019 | NLR | NSCLC (Immunotherapy)                   | OS  | 8  | 1396 | 7  | 1  | 3.4E-06   | 7  | 4  | 0.0703    | 7  | 8  | < 2.2e-16 | TRUE  | Yes           |
| Cao D         | 2018 | NLR | NSCLC (Nivoumab)                        | OS  | 8  | 666  | 7  | 6  | 0.6885    | 7  | 1  | 3.40E-06  | 7  | 5  | 0.2725    | TRUE  | None Detected |
| Cao D         | 2018 | NLR | NSCLC (Nivoumab)                        | PFS | 10 | 900  | 8  | 4  | 0.0183    | 8  | 1  | 3.74E-07  | 8  | 5  | 0.1094    | TRUE  | Yes           |
| Jiang T       | 2019 | NLR | NSCLC (PD-1 inhibitor)                  | OS  | 13 | 2018 | 13 | 9  | 0.0133    | 13 | 12 | 0.6173    | 13 | 13 | NA        | TRUE  | Yes           |
| Jiang T       | 2019 | NLR | NSCLC (PD-1 inhibitor)                  | PFS | 12 | 1614 | 8  | 9  | 0.5096    | 8  | 8  | NA        | 8  | 8  | NA        | FALSE | No            |
| Wang Z        | 2019 | NLR | NSCLC (ST)                              | OS  | 24 | 3694 | 19 | 2  | < 2.2e-16 | 19 | 2  | < 2.2e-16 | 19 | 20 | 0.5825    | TRUE  | None Detected |
| Wang Z        | 2019 | NLR | NSCLC (ST)                              | PFS | 16 | 2679 | 11 | 8  | 0.2101    | 11 | 1  | 1.85E-10  | 11 | 11 | NA        | TRUE  | None Detected |
| Wang Z        | 2019 | NLR | NSCLC (TT)                              | OS  | 5  | 422  | 5  | 0  | < 2.2e-16 | 5  | 0  | < 2.2e-16 | 5  | 4  | 0.5904    | TRUE  | No (NM)       |
| Wang Z        | 2019 | NLR | NSCLC (TT)                              | PFS | 5  | 619  | 3  | 1  | 0.0579    | 3  | 0  | < 2.2e-16 | 3  | 3  | NA        | TRUE  | Yes           |
| Zhang X       | 2018 | NLR | Oesophageal                             | OS  | 26 | 8985 | 16 | 25 | 2.13E-08  | 16 | 18 | 0.3999    | 16 | 22 | 0.0036    | FALSE | No            |
| Zhang X       | 2018 | NLR | Oesophageal                             | CSS | 7  | 1885 | 3  | 6  | 0.0102    | 3  | 6  | 0.0102    | 3  | 5  | 0.1083    | FALSE | No            |
| Zhang X       | 2018 | NLR | Oesophageal                             | RFS | 3  | 677  | 2  | 2  | NA        | 2  | 3  | < 2.2e-16 | 2  | 3  | < 2.2e-16 | NA    | No            |
| Zhang X       | 2018 | NLR | Oesophageal                             | DFS | 10 | 2837 | 5  | 5  | NA        | 5  | 4  | 0.5342    | 5  | 9  | 0.0016    | NA    | No            |
| Zhang X       | 2018 | NLR | Oesophageal                             | PFS | 4  | 908  | 2  | 3  | 0.2617    | 2  | 2  | NA        | 2  | 2  | NA        | FALSE | No            |
| Pirozzolo G   | 2019 | NLR | Oesophageal (DCRT)                      | OS  | 3  | 1563 | 3  | 3  | NA        | 3  | 3  | NA        | 3  | 3  | NA        | NA    | No            |
| Pirozzolo G   | 2019 | NLR | Oesophageal (Neo+Surgery)               | OS  | 3  | 1314 | 2  | 2  | NA        | 2  | 2  | NA        | 2  | 2  | NA        | NA    | No            |
| Zhang X       | 2018 | NLR | Oesophageal (No Surgery)                | OS  | 4  | 1046 | 3  | 4  | < 2.2e-16 | 3  | 4  | < 2.2e-16 | 3  | 4  | < 2.2e-16 | FALSE | No            |
| Zhang X       | 2018 | NLR | Oesophageal (Surgery)                   | OS  | 22 | 7119 | 12 | 20 | 8.90E-06  | 12 | 13 | 0.6703    | 12 | 17 | 0.0189    | FALSE | No            |
| Pirozzolo G   | 2019 | NLR | Oesophageal (Surgery+/-Chemo)           | OS  | 14 | 3580 | 10 | 9  | 0.7819    | 10 | 13 | 0.0146    | 10 | 13 | 0.0146    | TRUE  | None Detected |
| Zhang X       | 2018 | NLR | Oesophageal SCC                         | OS  | 18 | 7403 | 10 | 18 | < 2.2e-16 | 10 | 14 | 0.0408    | 10 | 14 | 0.0408    | FALSE | No            |
| Yang Y        | 2018 | NLR | Oral cavity                             | OS  | 9  | 2373 | 5  | 8  | 0.0121    | 5  | 8  | 0.0121    | 5  | 8  | 0.0121    | FALSE | No            |
| Yang Y        | 2018 | NLR | Oral cavity                             | DFS | 10 | 1920 | 6  | 9  | 0.0128    | 6  | 9  | 0.0128    | 6  | 9  | 0.0128    | FALSE | No            |
| Wang Y        | 2018 | NLR | Oral SCC                                | OS  | 6  | 1360 | 3  | 4  | NA        | 3  | 5  | NA        | 3  | 5  | NA        | FALSE | No            |
| Wang Y        | 2018 | NLR | Oral SCC                                | DFS | 6  | 1161 | 4  | 5  | NA        | 4  | 6  | NA        | 4  | 6  | NA        | FALSE | No            |

|                   |      |     |                                  |     |    |                 |    |    |           |    |    |           |    |    |           |       |               |
|-------------------|------|-----|----------------------------------|-----|----|-----------------|----|----|-----------|----|----|-----------|----|----|-----------|-------|---------------|
| Yang L            | 2019 | NLR | Oropharynx                       | DFS | 3  | NA <sup>†</sup> | 1  | 3  | < 2.2e-16 | 1  | 3  | < 2.2e-16 | 1  | 3  | < 2.2e-16 | FALSE | No            |
| Zhou Q            | 2017 | NLR | Ovarian                          | PFS | 12 | 3884            | 10 | 5  | 0.0056    | 10 | 1  | 9.11E-10  | 10 | 10 | NA        | TRUE  | Yes           |
| Zhou Q            | 2017 | NLR | Ovarian                          | OS  | 16 | 4910            | 12 | 5  | 0.0004    | 12 | 2  | 1.62E-08  | 12 | 14 | 0.1302    | TRUE  | Yes           |
| Zhou Y            | 2018 | NLR | Pancreatic                       | OS  | 43 | NA <sup>†</sup> | 36 | 13 | 5.59E-13  | 36 | 21 | 3.91E-06  | 36 | 37 | NA        | TRUE  | Yes           |
| Zhou Y            | 2018 | NLR | Pancreatic                       | DFS | 8  | 1236            | 5  | 1  | 0.0012    | 5  | 6  | NA        | 5  | 6  | NA        | TRUE  | Yes           |
| Yang JJ           | 2015 | NLR | Pancreatic                       | CSS | 3  | 845             | 3  | 1  | 0.0370    | 3  | 2  | 0.5556    | 3  | 2  | 0.5556    | TRUE  | Yes           |
| Mowbray N         | 2018 | NLR | Pancreatic (SR)                  | OS  | 8  | 1519            | 7  | 6  | 0.6885    | 7  | 6  | 0.6885    | 7  | 6  | 0.6885    | TRUE  | None Detected |
| Zhou Y            | 2018 | NLR | Pancreatic Neuroendocrine Tumour | OS  | 2  | 223             | 2  | 2  | NA        | 2  | 2  | NA        | 2  | 2  | NA        | NA    | No            |
| Zhou Y            | 2018 | NLR | Pancreatic Neuroendocrine Tumour | RFS | 2  | 223             | 2  | 2  | NA        | 2  | 2  | NA        | 2  | 2  | NA        | NA    | No            |
| Guo J             | 2018 | NLR | Prostate                         | PFS | 7  | 1088            | 5  | 7  | < 2.2e-16 | 5  | 6  | 0.2635    | 5  | 6  | 0.2635    | FALSE | No            |
| Cao J             | 2016 | NLR | Prostate                         | OS  | 16 | 15298           | 13 | NA | NA        | 13 | NA | NA        | 13 | NA | NA        | NA    | NA            |
| Guo J             | 2018 | NLR | Prostate (Metastatic)            | OS  | 8  | 2152            | 7  | 4  | 0.0703    | 7  | 7  | NA        | 7  | 8  | < 2.2e-16 | TRUE  | Yes           |
| Cao J             | 2016 | NLR | Prostate CR                      | PFS | 6  | 1629            | 5  | 3  | 0.2188    | 5  | 4  | 0.6708    | 5  | 4  | 0.6708    | TRUE  | None Detected |
| Yin X             | 2016 | NLR | Prostate CR                      | OS  | 9  | 2765            | 8  | 7  | 0.6939    | 8  | 7  | 0.6939    | 8  | 7  | 0.6939    | TRUE  | None Detected |
| Yin X             | 2016 | NLR | Prostate Localised               | OS  | 2  | 8765            | 1  | 1  | NA        | 1  | 1  | NA        | 1  | 2  | NA        | NA    | No            |
| Guan Y            | 2020 | NLR | Prostate CR (Abitaterone)        | OS  | 10 | 1626            | 7  | 2  | 0.0008644 | 7  | 8  | 0.4296    | 7  | 9  | 0.0702    | TRUE  | Yes           |
| Guan Y            | 2020 | NLR | Prostate CR (Abitaterone)        | PFS | 2  | 198             | 1  | 2  | < 2.2e-16 | 1  | 2  | < 2.2e-16 | 1  | 1  | NA        | FALSE | No            |
| Guan Y            | 2020 | NLR | Prostate CR (Enzalutamide)       | OS  | 5  | 1518            | 5  | 4  | 0.5904    | 5  | 3  | 0.1648    | 5  | 4  | 0.5904    | TRUE  | None Detected |
| Guan Y            | 2020 | NLR | Prostate CR (Enzalutamide)       | PFS | 2  | 427             | 2  | 2  | NA        | 2  | 1  | 0.5       | 2  | 2  | NA        | NA    | No            |
| Cao J             | 2016 | NLR | Prostate Localised               | RFS | 7  | 11745           | 3  | NA | NA        | 3  | NA | NA        | 3  | NA | NA        | NA    | NA            |
| Dong YW           | 2016 | NLR | Rectal                           | OS  | 6  | 857             | 1  | 6  | NA        | 1  | 6  | NA        | 1  | 6  | NA        | FALSE | No            |
| Dong YW           | 2016 | NLR | Rectal                           | DFS | 3  | 403             | 1  | 3  | NA        | 1  | 3  | NA        | 1  | 3  | NA        | FALSE | No            |
| Dong YW           | 2016 | NLR | Rectal                           | RFS | 3  | 433             | 0  | 3  | NA        | 0  | 3  | NA        | 0  | 3  | NA        | FALSE | No            |
| Na N              | 2016 | NLR | Renal                            | PFS | 8  | 1115            | 8  | 5  | 0.0289    | 8  | 1  | 5.96E-08  | 8  | 7  | 0.6073    | TRUE  | Yes           |
| Luo Y             | 2015 | NLR | Renal                            | OS  | 14 | 3373            | 13 | 11 | 0.3271    | 13 | 11 | 0.3271    | 13 | 12 | 0.7079    | TRUE  | None Detected |
| Luo Y             | 2015 | NLR | Renal                            | RFS | 3  | 700             | 2  | 3  | NA        | 2  | 3  | NA        | 2  | 3  | NA        | FALSE | No            |
| Luo Y             | 2015 | NLR | Renal                            | CSS | 4  | 1728            | 1  | 4  | NA        | 1  | 2  | NA        | 1  | 3  | NA        | FALSE | No            |
| Shen M            | 2014 | IN  | Renal                            | OS  | 2  | 206             | 2  | 2  | NA        | 2  | 2  | NA        | 2  | 2  | NA        | NA    | No            |
| Semeniuk-Wojtas A | 2018 | NLR | Renal (TKI)                      | OS  | 7  | NA <sup>†</sup> | 7  | 4  | 0.0226    | 7  | 6  | 0.6034    | 7  | 7  | NA        | TRUE  | Yes           |
| Semeniuk-Wojtas A | 2018 | NLR | Renal (TKI)                      | PFS | 6  | NA <sup>†</sup> | 6  | 1  | 2.14E-05  | 6  | 1  | 2.14E-05  | 6  | 5  | 0.5981    | TRUE  | Yes           |
| Boissier R        | 2017 | NLR | Renal Advanced                   | OS  | 7  | 1304            | 7  | 6  | 0.6034    | 7  | 4  | 0.0226    | 7  | 6  | 0.6034    | TRUE  | None Detected |

|              |      |     |                                 |     |    |                 |    |    |          |    |    |          |    |    |          |       |               |
|--------------|------|-----|---------------------------------|-----|----|-----------------|----|----|----------|----|----|----------|----|----|----------|-------|---------------|
| Boissier R   | 2017 | NLR | Renal Advanced                  | PFS | 3  | 306             | 3  | 3  | NA       | 3  | 3  | NA       | 3  | 3  | NA       | NA    | No            |
| Boissier R   | 2017 | NLR | Renal Localised                 | OS  | 3  | 1168            | 2  | 0  | 2.20E-16 | 2  | 0  | 2.20E-16 | 2  | 2  | NA       | TRUE  | Yes           |
| Boissier R   | 2017 | NLR | Renal Localised                 | RFS | 6  | 1962            | 3  | 0  | 2.20E-16 | 3  | 0  | 2.20E-16 | 3  | 6  | NA       | TRUE  | Yes           |
| Li LQ        | 2020 | NLR | STS                             | DFS | 7  | 1239            | 3  | 5  | 0.1083   | 3  | 6  | 0.0102   | 3  | 6  | 0.0102   | FALSE | No            |
| Liu G        | 2018 | NLR | STS                             | OS  | 13 | 2658            | 8  | 11 | 0.0377   | 8  | 3  | 0.0033   | 8  | 9  | 0.5551   | FALSE | No            |
| Li LQ        | 2020 | NLR | STS (Synovial Sarcoma)          | OS  | 3  | NA <sup>†</sup> | 3  | 3  | NA       | 3  | 3  | NA       | 3  | 3  | NA       | NA    | No            |
| Li LQ        | 2020 | NLR | STS (Liposarcoma)               | OS  | 2  | NA <sup>†</sup> | 2  | 2  | NA       | 2  | 2  | NA       | 2  | 2  | NA       | NA    | No            |
| Feng J       | 2020 | NLR | Thyroid                         | DFS | 7  | 6343            | 3  | 7  | <2.2e-16 | 3  | 4  | 0.4712   | 3  | 7  | <2.2e-16 | FALSE | No            |
| Luo Y        | 2015 | NLR | Upper Urinary                   | RFS | 2  | 802             | 2  | 1  | 0.5      | 2  | 2  | NA       | 2  | 2  | NA       | TRUE  | None Detected |
| Wei Y        | 2014 | NLR | Urinary                         | OS  | 13 | 3391            | 10 | 3  | 6.06E-05 | 10 | 9  | 0.7659   | 10 | 11 | NA       | TRUE  | Yes           |
| Su S         | 2019 | NLR | Urothelial                      | OS  | 7  | 2554            | 3  | 7  | <2.2e-16 | 3  | 3  | NA       | 3  | 3  | NA       | FALSE | No            |
| Su S         | 2019 | NLR | Urothelial                      | DFS | 2  | 400             | 1  | 2  | <2.2e-16 | 1  | 1  | NA       | 1  | 1  | NA       | FALSE | No            |
| Vartolomei M | 2018 | NLR | Urothelial                      | RFS | 6  | 3563            | 4  | 0  | 2.20E-16 | 4  | 3  | 0.6875   | 4  | 5  | NA       | TRUE  | Yes           |
| Suh J        | 2019 | NLR | Urothelial (Chemotherapy)       | OS  | 5  | 1664            | 5  | 4  | 0.5904   | 5  | 4  | 0.5904   | 5  | 4  | 0.5904   | TRUE  | None Detected |
| Suh J        | 2019 | NLR | Urothelial (Chemotherapy)       | PFS | 2  | 500             | 2  | 2  | NA       | 2  | 1  | 0.5      | 2  | 1  | 0.5      | NA    | No            |
| Suh J        | 2019 | NLR | Urothelial (Nephroureterectomy) | OS  | 3  | 1103            | 2  | 3  | <2.2e-16 | 2  | 3  | <2.2e-16 | 2  | 3  | <2.2e-16 | FALSE | No            |
| Suh J        | 2019 | NLR | Urothelial (Nephroureterectomy) | PFS | 8  | 4411            | 5  | 1  | 0.0012   | 5  | 5  | NA       | 5  | 7  | 0.06735  | TRUE  | Yes           |
| Suh J        | 2019 | NLR | Urothelial (Radical Cystectomy) | CSS | 9  | 6974            | 8  | 4  | 0.0133   | 8  | 1  | 1.88E-07 | 8  | 8  | NA       | TRUE  | Yes           |
| Suh J        | 2019 | NLR | Urothelial (Radical Cystectomy) | OS  | 10 | 7049            | 8  | 2  | 7.79E-05 | 8  | 1  | 3.74E-07 | 8  | 8  | NA       | TRUE  | Yes           |
| Suh J        | 2019 | NLR | Urothelial (Radical Cystectomy) | PFS | 5  | 5935            | 4  | 3  | 0.6544   | 4  | 1  | 0.0067   | 4  | 2  | 0.0870   | TRUE  | None Detected |
| Mori K       | 2020 | NLR | UTUC (Nephroureterectomy)       | CSS | 12 | 6350            | 7  | 1  | 1.52E-05 | 7  | 10 | 0.0364   | 7  | 11 | 0.0019   | TRUE  | Yes           |
| Mori K       | 2020 | NLR | UTUC (Radical Cystectomy)       | CSS | 12 | 11158           | 11 | 5  | 0.0005   | 11 | 2  | 2.80E-08 | 11 | 7  | 0.0189   | TRUE  | Yes           |

(A) Not applicable, N=number of component studies with in review, (O) Observed number of significant studies, (E) Expected number of significant studies, (T) True, (F) False, (HR), Hazard ratio, (NLR) Neutrophil to lymphocyte ratio, (IN) Intratumoural neutrophils, (PN) Peritumoural neutrophils, (SN) Stromal Neutrophils, (OS) Overall Survival, (DFS) Disease-Free Survival, (PFS) Progression-Free Survival, (RFS) Recurrence-Free Survival, (CSS) Cancer Specific Survival, (VEGFR) Vascular Endothelial Growth Factor Receptor, (PC) Palliative Chemotherapy, (SBR) Surgical Bowel Resection, (NAC) Neoadjuvant Chemotherapy, (STS) Soft Tissue Sarcoma, (UTR) Urothelial Transurethral Resection, (SR) Surgical Resection, (GNT) Gastroenteropancreatic Neuroendocrine Tumors, (SCC) Squamous Cell Carcinoma, (ST) Systematic Therapy, (MT) Mixed Therapy, (TT) Targeted Therapy, (CLM) Colorectal Liver Metastasis, (NS) Non-surgical, (ICC) Intrahepatic Cholangiocarcinoma, (RFA) Radiofrequency Ablation, (TACE) Trans-Arterial Chemoembolization, (MPM) Malignant Pleural Mesothelioma, (NSCLC) Non-Small Cell Lung Cancer, (NHC), Neck and Head Cancer, (UTUC) Upper tract Urothelial Carcinoma, (DCRT) Definitive Chemoradiotherapy, (CR) Castration Resistant, (TKI) Tyrosine Kinase Inhibitor.

All-cancers are defined as a grouping of cancer diagnosis unrelated to site, stage or treatment unless otherwise specified.  
Review reported incomplete data on sample size.

ID) None detected – binomial probability test yielded a p-value>0.10.

Io) – no excess significance, observed<expected.

Io (NS)) - No excess significance, no observed significant studies.

### Appendix I: Grading of evidence (GRADE criteria)

| Author         | Year | Biomarker | Cancer site                                | meta-analysis metric | Significance |                         |                         | Sample Size |     | Largest Study Sig. at <0.05 | Heterogeneity |                      | Pred. Sig. | No Small Study Effects |              |                  | Excess Sig.   | 10% Cred. Ceiling Sig. | Level of Evidence |
|----------------|------|-----------|--------------------------------------------|----------------------|--------------|-------------------------|-------------------------|-------------|-----|-----------------------------|---------------|----------------------|------------|------------------------|--------------|------------------|---------------|------------------------|-------------------|
|                |      |           |                                            |                      | Sig at <0.05 | Sig at 10 <sup>-4</sup> | Sig at 10 <sup>-6</sup> | >1000 Ind.  | N>3 |                             | Q             | I <sup>2</sup> > 50% |            | T / F                  | ARC-Thompson | Largest > Random |               |                        |                   |
| Suh J          | 2019 | NLR       | Bladder (UTR)                              | RFS                  | T            | T                       | T                       | T           | T   | T                           | 0.284         | 20%                  | T          | T                      | 0.180        | F                | No            | T                      | Strong            |
| Ni L           | 2020 | NLR       | Endometrial                                | OS                   | T            | T                       | T                       | T           | T   | T                           | 0.830         | 0%                   | T          | T                      | 0.261        | F                | No            | T                      | Strong            |
| Yang S         | 2019 | NLR       | Nasopharyngeal                             | OS                   | T            | T                       | T                       | T           | T   | T                           | 0.358         | 9%                   | T          | T                      | 0.171        | F                | No            | T                      | Strong            |
| Yin J          | 2017 | NLR       | Nasopharyngeal                             | PFS                  | T            | T                       | T                       | T           | T   | T                           | 0.452         | 0%                   | T          | T                      | 0.183        | F                | No            | T                      | Strong            |
| Vartolomei MD  | 2018 | NLR       | Non muscle Invasive Bladder                | PFS                  | T            | T                       | T                       | T           | T   | T                           | 0.506         | 0%                   | T          | T                      | 0.149        | F                | No            | T                      | Strong            |
| Yin X          | 2016 | NLR       | Prostate CR                                | OS                   | T            | T                       | T                       | T           | T   | T                           | 0.380         | 7%                   | T          | T                      | 0.340        | F                | None Detected | T                      | Strong            |
| Li LQ          | 2020 | NLR       | STS                                        | DFS                  | T            | T                       | T                       | T           | T   | T                           | 0.590         | 0%                   | T          | T                      | 0.125        | F                | No            | T                      | Strong            |
| Jiang T        | 2018 | NLR       | Advanced Cancer (Anti-VEGFR)               | OS                   | T            | T                       | T                       | T           | T   | T                           | <0.001        | 88%                  | F          | F                      | 0.016        | T                | No            | T                      | Highly            |
| Jiang T        | 2018 | NLR       | Advanced Cancer (Immunotherapy)            | PFS                  | T            | T                       | T                       | T           | T   | T                           | <0.001        | 86%                  | F          | F                      | 0.002        | F                | None Detected | T                      | Highly            |
| Mei Z          | 2017 | NLR       | Composite endpoints                        | PFS                  | T            | T                       | T                       | T           | T   | T                           | <0.001        | 89%                  | F          | F                      | 0.001        | T                | No            | T                      | Highly            |
| Paramanathan A | 2014 | NLR       | Composite endpoints                        | DFS                  | T            | T                       | T                       | T           | T   | T                           | <0.001        | 97%                  | F          | F                      | <0.001       | F                | Yes           | T                      | Highly            |
| Tang H         | 2017 | NLR       | Biliary Tract                              | OS                   | T            | T                       | T                       | T           | T   | T                           | 0.298         | 14%                  | T          | T                      | 0.154        | F                | Yes           | T                      | Highly            |
| Wu S           | 2018 | NLR       | Bladder                                    | RFS                  | T            | T                       | T                       | T           | T   | T                           | 0.001         | 71%                  | F          | F                      | 0.005        | F                | Yes           | T                      | Highly            |
| Ethier JL      | 2017 | NLR       | Breast                                     | OS                   | T            | T                       | T                       | T           | T   | T                           | 0.009         | 55%                  | T          | F                      | 0.001        | F                | None Detected | F                      | Highly            |
| Chen J         | 2018 | NLR       | Breast (Metastasis)                        | DFS                  | T            | T                       | T                       | T           | F   | T                           | 0.976         | 0%                   | F          | F                      | 0.862        | T                | No            | T                      | Highly            |
| Duan J         | 2018 | NLR       | Breast (SR)                                | OS                   | T            | T                       | T                       | T           | T   | T                           | 0.008         | 57%                  | F          | F                      | 0.219        | T                | No            | T                      | Highly            |
| Guo W          | 2019 | NLR       | Breast (Triple Negative and Her2 Positive) | DFS                  | T            | T                       | T                       | T           | T   | T                           | 0.002         | 50%                  | T          | F                      | 0.015        | F                | No            | T                      | Highly            |
| Zheng DC       | 2016 | NLR       | Colorectal                                 | OS                   | T            | T                       | T                       | T           | T   | T                           | <0.001        | 66%                  | F          | F                      | 0.010        | F                | None Detected | T                      | Highly            |
| Tang H         | 2016 | NLR       | CLM                                        | OS                   | T            | T                       | T                       | T           | T   | T                           | 0.655         | 0%                   | T          | F                      | 0.246        | T                | No            | T                      | Highly            |
| Tang H         | 2016 | NLR       | CLM                                        | RFS                  | T            | T                       | T                       | T           | T   | T                           | 0.102         | 45%                  | F          | F                      | 0.455        | T                | No            | T                      | Highly            |
| Tang H         | 2016 | NLR       | CLM (SR)                                   | OS                   | T            | T                       | T                       | T           | T   | T                           | 0.731         | 0%                   | T          | F                      | 0.713        | T                | No            | T                      | Highly            |
| Sun J          | 2016 | NLR       | Gastric                                    | OS                   | T            | T                       | T                       | T           | T   | T                           | 0.004         | 53%                  | T          | T                      | 0.105        | F                | None Detected | T                      | Highly            |

|             |      |     |                                              |     |   |   |   |   |   |   |        |     |   |   |        |   |               |   |        |
|-------------|------|-----|----------------------------------------------|-----|---|---|---|---|---|---|--------|-----|---|---|--------|---|---------------|---|--------|
| Szor D      | 2018 | NLR | Gastric (SR)                                 | OS  | T | T | T | T | T | T | <0.001 | 85% | F | F | 0.737  | T | No            | T | Highly |
| Ethier JL   | 2017 | NLR | Gynecologic                                  | OS  | T | T | T | T | T | T | <0.001 | 71% | F | F | <0.001 | F | None Detected | T | Highly |
| Tham T      | 2018 | NLR | Head and Neck                                | OS  | T | T | T | T | T | T | 0.066  | 31% | T | F | <0.001 | F | No            | T | Highly |
| Min GT      | 2018 | NLR | Hepatocellular                               | OS  | T | T | T | T | T | T | <0.001 | 81% | F | F | <0.001 | F | Yes           | T | Highly |
| Min GT      | 2018 | NLR | Hepatocellular                               | DFS | T | T | T | T | T | T | <0.001 | 80% | F | F | <0.001 | F | None Detected | T | Highly |
| Min GT      | 2018 | NLR | Hepatocellular                               | RFS | T | T | T | T | T | T | <0.001 | 84% | F | F | 0.001  | F | None Detected | T | Highly |
| Liu L       | 2019 | NLR | Hepatocellular (Sorfenib)                    | OS  | T | T | T | T | T | T | 0.001  | 68% | T | F | 0.001  | T | No            | T | Highly |
| Wang Y      | 2018 | NLR | Hepatocellular (SR)                          | RFS | T | T | T | T | T | T | 0.236  | 22% | T | F | 0.079  | F | None Detected | T | Highly |
| Wang Y      | 2018 | NLR | Hepatocellular (SR)                          | OS  | T | T | T | T | T | T | 0.137  | 31% | T | F | 0.010  | F | None Detected | T | Highly |
| Wang Y      | 2018 | NLR | Hepatocellular (SR)                          | DFS | T | T | T | T | T | T | 0.203  | 30% | T | F | 0.052  | F | Yes           | T | Highly |
| Li S        | 2020 | NLR | Hepatocellular (TACE)                        | OS  | T | T | T | T | T | T | 0.019  | 47% | T | F | 0.031  | F | Yes           | T | Highly |
| Jiang T     | 2018 | NLR | Immunotherapy (Advanced Cancer)              | OS  | T | T | T | T | T | T | <0.001 | 81% | T | F | 0.009  | T | No            | T | Highly |
| Tan Q       | 2018 | NLR | Immunotherapy (Immune checkpoint inhibitors) | OS  | T | T | T | T | T | T | <0.001 | 87% | F | F | <0.001 | F | No            | T | Highly |
| Tan Q       | 2018 | NLR | Immunotherapy (Immune checkpoint inhibitors) | PFS | T | T | T | T | T | T | <0.001 | 85% | F | F | <0.001 | F | Yes           | T | Highly |
| Zhao QT     | 2015 | NLR | Lung (both)                                  | OS  | T | T | T | T | T | T | <0.001 | 80% | F | F | 0.001  | T | None Detected | T | Highly |
| Xie X       | 2019 | NLR | Melanoma (Immune checkpoint inhibitors)      | OS  | T | T | T | T | T | T | <0.001 | 95% | F | F | 0.050  | F | None Detected | T | Highly |
| Li X        | 2018 | NLR | NAC                                          | OS  | T | T | T | T | T | T | <0.001 | 77% | F | F | <0.001 | T | No            | T | Highly |
| Gu XB       | 2015 | NLR | NSCLC                                        | PFS | T | T | T | T | T | T | <0.001 | 82% | F | F | <0.001 | F | None Detected | T | Highly |
| Jiang T     | 2019 | NLR | NSCLC (PD-1 inhibitor)                       | OS  | T | T | T | T | T | T | 0.222  | 22% | T | F | 0.006  | F | Yes           | T | Highly |
| Jiang T     | 2019 | NLR | NSCLC (PD-1 inhibitor)                       | PFS | T | T | T | T | T | T | 0.982  | 0%  | T | F | 0.742  | T | No            | T | Highly |
| Wang Z      | 2019 | NLR | NSCLC (ST)                                   | PFS | T | T | T | T | T | T | <0.001 | 78% | F | F | <0.001 | F | None Detected | T | Highly |
| Zhang X     | 2018 | NLR | Oesophageal                                  | OS  | T | T | T | T | T | T | <0.001 | 74% | F | F | 0.039  | T | No            | T | Highly |
| Pirozzolo G | 2019 | NLR | Oesophageal (DCRT)                           | OS  | T | T | T | T | F | T | 0.562  | 0%  | F | T | 0.513  | F | No            | T | Highly |
| Zhang X     | 2018 | NLR | Oesophageal (Surgery)                        | OS  | T | T | T | T | T | T | <0.001 | 76% | F | F | 0.076  | T | No            | T | Highly |



|                   |      |     |                                            |     |   |   |   |   |   |   |        |     |   |   |        |   |               |   |            |
|-------------------|------|-----|--------------------------------------------|-----|---|---|---|---|---|---|--------|-----|---|---|--------|---|---------------|---|------------|
| Pirozzolo G       | 2019 | NLR | Oesophageal (Surgery+/-Chemo)              | OS  | T | T | T | T | T | T | <0.001 | 69% | F | T | 0.225  | F | None Detected | T | Highly     |
| Zhang X           | 2018 | NLR | Oesophageal SCC                            | OS  | T | T | T | T | T | T | <0.001 | 68% | F | F | 0.331  | T | No            | T | Highly     |
| Yang Y            | 2018 | NLR | Oral cavity                                | OS  | T | T | T | T | T | T | 0.112  | 38% | T | F | 0.747  | T | No            | T | Highly     |
| Yang Y            | 2018 | NLR | Oral cavity                                | DFS | T | T | T | T | T | T | 0.484  | 0%  | T | F | 0.045  | T | No            | T | Highly     |
| Zhou Y            | 2018 | NLR | Pancreatic                                 | OS  | T | T | T | T | T | T | <0.001 | 82% | F | F | <0.001 | F | Yes           | T | Highly     |
| Mowbray N         | 2018 | NLR | Pancreatic (SR)                            | OS  | T | T | T | T | T | T | 0.180  | 31% | T | F | 0.054  | F | None Detected | T | Highly     |
| Guo J             | 2018 | NLR | Prostate                                   | PFS | T | T | T | T | T | T | 0.222  | 27% | T | F | 0.178  | T | No            | T | Highly     |
| Guo J             | 2018 | NLR | Prostate (Metastatic)                      | OS  | T | T | T | T | T | T | 0.099  | 40% | T | F | 0.023  | F | Yes           | T | Highly     |
| Guan Y            | 2020 | NLR | Prostate CR (Enzalutamide)                 | OS  | T | T | T | T | T | T | 0.037  | 61% | F | T | 0.110  | F | None Detected | T | Highly     |
| Luo Y             | 2015 | NLR | Renal                                      | OS  | T | T | T | T | T | T | 0.104  | 35% | T | F | 0.017  | F | None Detected | T | Highly     |
| Semeniuk-Wojtas A | 2018 | NLR | Renal (TKI)                                | OS  | T | T | T | T | T | T | 0.113  | 42% | T | T | 0.385  | F | Yes           | T | Highly     |
| Boissier R        | 2017 | NLR | Renal Advanced                             | OS  | T | T | T | T | T | T | 0.004  | 69% | F | F | 0.009  | T | None Detected | T | Highly     |
| Liu G             | 2018 | NLR | STS                                        | OS  | T | T | T | T | T | T | <0.001 | 76% | F | F | 0.018  | T | No            | T | Highly     |
| Suh J             | 2019 | NLR | Urothelial (Chemotherapy)                  | OS  | T | T | T | T | T | T | 0.224  | 30% | T | F | 0.131  | T | None Detected | T | Highly     |
| Mei Z             | 2017 | NLR | Composite endpoints                        | OS  | T | T | T | T | T | F | <0.001 | 90% | T | F | <0.001 | F | Yes           | T | Suggestive |
| Shen M            | 2014 | IN  | Composite endpoints                        | OS  | T | T | T | T | T | F | <0.001 | 70% | F | F | 0.033  | F | Yes           | T | Suggestive |
| Dolan R           | 2017 | NLR | Composite endpoints Operable               | OS  | T | T | T | T | T | F | <0.001 | 98% | F | F | <0.001 | F | Yes           | T | Suggestive |
| Dolan R           | 2017 | NLR | Composite endpoints Operable               | CSS | T | T | T | T | T | F | <0.001 | 80% | F | F | <0.001 | F | Yes           | T | Suggestive |
| Hu G              | 2019 | NLR | Bladder                                    | OS  | T | T | F | T | T | T | <0.001 | 78% | F | F | <0.001 | F | Yes           | T | Suggestive |
| Suh J             | 2019 | NLR | Bladder (UTR)                              | PFS | T | T | F | T | T | T | 0.635  | 0%  | F | T | 0.717  | F | No            | T | Suggestive |
| Li X              | 2017 | NLR | Bladder and Upper Urinary                  | PFS | T | T | T | T | T | F | 0.018  | 45% | T | F | <0.001 | F | Yes           | T | Suggestive |
| Li X              | 2017 | NLR | Bladder and Upper Urinary                  | CSS | T | T | T | T | T | F | <0.001 | 66% | F | F | 0.001  | F | Yes           | T | Suggestive |
| Liu X             | 2017 | NLR | Breast                                     | DFS | T | T | F | T | T | T | <0.001 | 76% | F | F | <0.001 | F | No            | T | Suggestive |
| Duan J            | 2018 | NLR | Breast (SR)                                | DFS | T | T | F | T | T | T | <0.001 | 85% | F | F | 0.046  | T | No            | T | Suggestive |
| Guo W             | 2019 | NLR | Breast (Triple Negative and Her2 Positive) | OS  | T | T | T | T | T | F | <0.001 | 72% | F | F | 0.005  | F | None Detected | T | Suggestive |
| Wu J              | 2017 | NLR | Cervical                                   | OS  | T | T | F | T | T | T | 0.006  | 58% | F | F | 0.016  | F | None Detected | T | Suggestive |
| Wu J              | 2017 | NLR | Cervical                                   | PFS | T | T | F | T | T | T | <0.001 | 90% | F | T | 0.192  | F | Yes           | T | Suggestive |
| Zhang J           | 2017 | NLR | Colorectal                                 | DFS | T | T | F | T | T | F | 0.229  | 29% | F | T | 0.253  | F | No            | T | Suggestive |

|               |      |     |                             |     |   |   |   |   |   |   |        |     |   |   |        |   |               |   |            |
|---------------|------|-----|-----------------------------|-----|---|---|---|---|---|---|--------|-----|---|---|--------|---|---------------|---|------------|
| Zheng DC      | 2016 | NLR | Colorectal                  | PFS | T | T | T | T | T | F | 0.009  | 54% | F | F | 0.041  | T | No            | T | Suggestive |
| Li H          | 2019 | NLR | Colorectal (SR)             | OS  | T | T | T | T | T | F | 0.015  | 54% | F | F | 0.034  | F | No            | T | Suggestive |
| Tang H        | 2016 | NLR | CLM (Non-surgical)          | OS  | T | T | F | F | F | T | 0.710  | 0%  | F | T | NA     | F | No            | F | Suggestive |
| Ni L          | 2020 | NLR | Endometrial                 | PFS | T | T | F | T | T | T | 0.203  | 33% | F | T | 0.284  | F | No            | T | Suggestive |
| Lei Y         | 2019 | NLR | Glioma                      | OS  | T | T | T | T | T | F | <0.001 | 83% | F | F | <0.001 | F | No            | F | Suggestive |
| Tham T        | 2018 | NLR | Head and neck               | DFS | T | T | F | T | T | F | 0.114  | 36% | F | F | 0.032  | F | No (NM)       | T | Suggestive |
| Tham T        | 2018 | NLR | Head and Neck (No Surgery)  | OS  | T | T | F | T | T | T | 0.238  | 23% | F | F | 0.052  | T | No            | T | Suggestive |
| Yang L        | 2019 | NLR | Head and Neck (SCC)         | CSS | T | T | F | T | T | T | 0.110  | 47% | T | T | 0.124  | F | No            | T | Suggestive |
| Cho J         | 2018 | NLR | Head and Neck (SCC)         | OS  | T | T | T | T | T | F | 0.005  | 48% | T | F | 0.001  | F | No            | T | Suggestive |
| Cho J         | 2018 | NLR | Head and Neck (SCC)         | DFS | T | T | F | T | T | F | <0.001 | 69% | F | F | 0.003  | F | None Detected | T | Suggestive |
| Xu ZG         | 2018 | NLR | Hepatocellular (Transplant) | OS  | T | T | F | T | T | F | <0.001 | 86% | F | F | 0.008  | F | None Detected | F | Suggestive |
| Yang L        | 2019 | NLR | Larynx                      | DFS | T | T | F | T | F | T | 0.399  | 0%  | F | T | 0.415  | F | No            | T | Suggestive |
| Mascarella M  | 2018 | NLR | Larynx                      | OS  | T | T | F | T | T | F | 0.364  | 8%  | T | T | 0.268  | F | None Detected | T | Suggestive |
| Yu Y          | 2017 | NLR | Lung (Surgery)              | OS  | T | T | F | T | T | T | <0.001 | 83% | F | F | 0.017  | T | None Detected | T | Suggestive |
| Zhan H        | 2018 | NLR | Melanoma                    | OS  | T | T | F | T | T | T | <0.001 | 91% | F | F | 0.013  | F | None Detected | T | Suggestive |
| Zeng Q        | 2018 | NLR | Multiple Myeloma            | OS  | T | T | F | T | T | T | <0.001 | 81% | F | F | 0.286  | T | No            | F | Suggestive |
| Su L          | 2017 | NLR | Nasopharyngeal              | CSS | T | T | F | T | F | T | 0.480  | 0%  | F | T | 0.487  | F | No            | T | Suggestive |
| Vartolomei MD | 2018 | NLR | Non muscle Invasive Bladder | RFS | T | T | F | T | T | T | 0.015  | 64% | F | T | 0.282  | F | None Detected | T | Suggestive |
| Lu Y          | 2020 | NLR | NSCLC                       | OS  | T | T | T | T | T | F | <0.001 | 64% | F | F | 0.002  | F | Yes           | T | Suggestive |
| Wang Z        | 2019 | NLR | NSCLC (Chemotherapy)        | OS  | T | T | F | T | T | T | <0.001 | 85% | F | F | 0.049  | F | No            | F | Suggestive |
| Wang Z        | 2019 | NLR | NSCLC (Immunotherapy)       | OS  | T | T | T | T | T | F | <0.001 | 80% | F | F | 0.001  | F | Yes           | T | Suggestive |
| Wang Z        | 2019 | NLR | NSCLC (ST)                  | OS  | T | T | T | T | T | F | <0.001 | 83% | F | F | <0.001 | F | None Detected | T | Suggestive |
| Zhang X       | 2018 | NLR | Oesophageal (No Surgery)    | OS  | T | T | F | T | T | T | 0.080  | 56% | F | F | 0.549  | T | No            | F | Suggestive |
| Wang Y        | 2018 | NLR | Oral SCC                    | OS  | T | T | F | T | T | T | 0.496  | 0%  | T | T | 0.327  | F | No            | T | Suggestive |
| Zhou Q        | 2017 | NLR | Ovarian                     | PFS | T | T | F | T | T | T | <0.001 | 85% | F | F | 0.004  | F | Yes           | T | Suggestive |
| Zhou Q        | 2017 | NLR | Ovarian                     | OS  | T | T | F | T | T | F | <0.001 | 80% | F | F | <0.001 | F | Yes           | T | Suggestive |
| Cao J         | 2016 | NLR | Prostate                    | OS  | T | T | T | T | T | F | <0.001 | 69% | T | F | 0.002  | F | NA            | T | Suggestive |
| Cao J         | 2016 | NLR | Prostate CR                 | PFS | T | T | F | T | T | T | 0.090  | 47% | F | T | 0.163  | F | None Detected | T | Suggestive |

|             |      |     |                                 |     |   |   |   |   |   |   |        |     |   |   |        |   |               |     |            |
|-------------|------|-----|---------------------------------|-----|---|---|---|---|---|---|--------|-----|---|---|--------|---|---------------|-----|------------|
| Guan Y      | 2020 | NLR | Prostate CR (Abitaterone)       | OS  | T | T | T | T | T | F | 0.053  | 46% | T | F | 0.069  | F | Yes           | T   | Suggestive |
| Dong YW     | 2016 | NLR | Rectal                          | OS  | T | T | F | F | T | T | 0.879  | 0%  | T | F | 0.298  | T | No            | T   | Suggestive |
| Na N        | 2016 | NLR | Renal                           | PFS | T | T | F | T | T | T | <0.001 | 88% | F | F | 0.046  | F | Yes           | T   | Suggestive |
| Wei Y       | 2014 | NLR | Urinary                         | OS  | T | T | T | T | T | F | 0.005  | 58% | F | F | <0.001 | F | Yes           | T   | Suggestive |
| Suh J       | 2019 | NLR | Urothelial (Nephroureterectomy) | OS  | T | T | F | T | F | T | 0.463  | 0%  | F | T | 0.544  | F | No            | T   | Suggestive |
| Suh J       | 2019 | NLR | Urothelial (Nephroureterectomy) | PFS | T | T | F | T | T | F | 0.013  | 61% | F | F | 0.011  | F | Yes           | F   | Suggestive |
| Suh J       | 2019 | NLR | Urothelial (Radical Cystectomy) | CSS | T | T | F | T | T | T | <0.001 | 88% | F | F | 0.001  | F | Yes           | T   | Suggestive |
| Mori K      | 2020 | NLR | UTUC (Nephroureterectomy)       | CSS | T | T | T | T | T | F | 0.022  | 51% | F | T | 0.104  | F | Yes           | T   | Suggestive |
| Mori K      | 2020 | NLR | UTUC (Radical Cystectomy)       | CSS | T | T | F | T | T | T | <0.001 | 78% | F | F | <0.001 | F | Yes           | T   | Suggestive |
| Shen M      | 2014 | IN  | Composite endpoints             | CSS | T | T | T | F | F | T | 0.8243 | 0%  | F | T | NA     | F | No            | F   | Weak       |
| Tang H      | 2017 | NLR | Biliary Tract                   | RFS | T | T | F | F | T | F | 0.144  | 42% | F | F | 0.093  | F | Yes           | T   | Weak       |
| Wu S        | 2018 | NLR | Bladder (Metastasis)            | OS  | T | T | T | F | T | T | 0.922  | 0%  | T | F | 0.976  | T | No            | T   | Weak       |
| Hu G        | 2019 | NLR | Bladder (Radical Cystectomy)    | OS  | T | F | F | T | T | T | 0.001  | 73% | F | F | 0.003  | F | Yes           | T   | Weak       |
| Liu X       | 2017 | NLR | Breast                          | CSS | T | F | F | T | T | F | 0.004  | 77% | F | F | 0.071  | F | None Detected | F   | Weak       |
| Chen J      | 2018 | NLR | Breast (Metastasis)             | OS  | T | T | T | F | F | T | 0.923  | 0%  | F | T | NA     | F | No            | F   | Weak       |
| Duan J      | 2018 | NLR | Breast (SR)                     | RFS | T | T | F | F | F | T | 0.839  | 0%  | F | F | NA     | T | No            | F   | Weak       |
| Liu X       | 2017 | NLR | Breast (Triple-negative)        | OS  | T | T | F | F | T | T | 0.479  | 0%  | F | F | 0.262  | T | No            | T   | Weak       |
| Liu X       | 2017 | NLR | Breast (Triple-negative)        | DFS | T | T | F | F | T | T | 0.609  | 0%  | F | T | 0.357  | F | No            | T   | Weak       |
| Malietzis G | 2014 | NLR | Colorectal (PC)                 | DFS | T | T | F | F | F | T | 0.834  | 0%  | F | T | 0.686  | F | No            | F   | Weak       |
| Li H        | 2019 | NLR | Colorectal (SR)                 | DFS | T | F | F | T | T | F | 0.032  | 52% | F | F | 0.027  | F | No            | F   | Weak       |
| Li H        | 2019 | NLR | Colorectal (SR)                 | RFS | T | T | T | F | F | T | 0.424  | 0%  | F | T | 0.638  | F | No            | T   | Weak       |
| Tang H      | 2016 | NLR | CLM (Non-surgical)              | RFS | T | F | F | F | F | F | 0.232  | 30% | F | T | NA     | F | No            | F   | Weak       |
| Tang H      | 2016 | NLR | CLM (SR)                        | RFS | T | T | F | F | T | T | 0.063  | 59% | F | F | 0.576  | T | Yes           | F F | Weak       |
| Sun J       | 2016 | NLR | Gastric                         | DFS | T | T | T | F | T | T | 0.780  | 0%  | T | F | 0.887  | T | No            | T   | Weak       |
| Zhang X     | 2014 | NLR | Gastric                         | PFS | T | F | F | F | F | T | 0.275  | 16% | F | T | NA     | F | None Detected | F   | Weak       |
| Mellor K    | 2018 | NLR | Gastric (SR)                    | DFS | T | F | F | F | F | T | 0.007  | 80% | F | F | 0.197  | T | No            | T   | Weak       |
| Zhou Y      | 2018 | NLR | GNT                             | OS  | T | T | T | F | T | T | 0.571  | 0%  | T | F | 0.299  | T | No            | T   | Weak       |
| Zhou Y      | 2018 | NLR | GNT                             | RFS | T | T | T | F | F | T | 0.484  | 0%  | F | T | 0.466  | F | No            | T   | Weak       |

|               |      |     |                                         |     |   |   |   |   |   |   |        |     |   |   |       |   |               |   |      |
|---------------|------|-----|-----------------------------------------|-----|---|---|---|---|---|---|--------|-----|---|---|-------|---|---------------|---|------|
| Yu Y          | 2018 | NLR | Head and Neck                           | RFS | T | F | F | F | T | T | 0.023  | 69% | F | F | 0.182 | T | No            | F | Weak |
| Tham T        | 2018 | NLR | Head and neck                           | PFS | T | F | F | T | T | T | 0.053  | 54% | F | F | 0.276 | T | No            | F | Weak |
| Shen M        | 2014 | IN  | Head and Neck                           | OS  | T | F | F | F | F | F | 0.391  | 0%  | F | F | 0.419 | T | No            | F | Weak |
| Yang L        | 2019 | NLR | Head and Neck (SCC)                     | PFS | T | F | F | F | T | T | 0.104  | 51% | F | F | 0.177 | T | No            | F | Weak |
| Tham T        | 2018 | NLR | Head and Neck (SR)                      | OS  | T | F | F | F | F | T | 0.087  | 59% | F | T | 0.272 | F | None Detected | F | Weak |
| Xiao WK       | 2014 | NLR | Hepatocellular (MT)                     | OS  | T | T | F | F | F | T | 0.374  | 0%  | F | T | 0.394 | F | None Detected | T | Weak |
| Xiao WK       | 2014 | NLR | Hepatocellular (RFA)                    | OS  | T | T | F | F | F | T | 0.333  | 0%  | F | F | NA    | T | Yes           | F | Weak |
| Xu ZG         | 2018 | NLR | Hepatocellular (Transplant)             | RFS | T | T | F | F | T | T | 0.029  | 67% | F | T | 0.262 | F | No            | T | Weak |
| Shen M        | 2014 | IN  | Hepatocellular and ICC                  | OS  | T | T | F | F | T | T | 0.071  | 57% | F | F | 0.742 | T | No            | F | Weak |
| Yang L        | 2019 | NLR | Hypopharynx                             | OS  | T | T | T | F | F | T | 0.622  | 0%  | F | F | 0.589 | T | No            | T | Weak |
| Xie X         | 2019 | NLR | Ipilimumuab                             | OS  | T | T | F | F | T | T | <0.001 | 96% | F | F | 0.046 | F | None Detected | T | Weak |
| Xie X         | 2019 | NLR | Ipilimumuab                             | PFS | T | F | F | F | F | F | 0.036  | 70% | F | T | 0.461 | F | No (NM)       | F | Weak |
| Mu S          | 2018 | NLR | Large B                                 | OS  | T | F | F | T | T | F | <0.001 | 71% | F | F | 0.131 | F | Yes           | T | Weak |
| Mu S          | 2018 | NLR | Large B                                 | PFS | T | F | F | T | T | T | 0.001  | 69% | F | T | T     | F | No            | T | Weak |
| Zhao QT       | 2015 | NLR | Lung (both)                             | PFS | T | F | F | T | T | T | <0.001 | 80% | F | F | 0.205 | T | No            | T | Weak |
| Ding Y        | 2018 | NLR | Melanoma                                | PFS | T | T | T | F | T | F | 0.558  | 0%  | T | T | 0.241 | F | No            | T | Weak |
| Xie X         | 2019 | NLR | Melanoma (Immune checkpoint inhibitors) | PFS | T | T | T | F | T | T | 0.199  | 35% | T | T | 0.716 | F | None Detected | T | Weak |
| Chen          | 2017 | NLR | MPM                                     | OS  | T | F | F | T | T | F | <0.001 | 77% | F | T | 0.719 | F | Yes           | F | Weak |
| Zeng Q        | 2018 | NLR | Multiple Myeloma                        | PFS | T | F | F | T | T | T | <0.001 | 88% | F | F | 0.039 | T | No            | F | Weak |
| Li X          | 2018 | NLR | NAC                                     | RFS | T | T | F | F | T | T | 0.151  | 36% | F | F | 0.104 | T | No            | T | Weak |
| Li X          | 2018 | NLR | NAC                                     | CSS | T | F | F | F | T | T | <0.001 | 81% | F | F | 0.126 | T | No            | T | Weak |
| Xie X         | 2019 | NLR | Nivolumab                               | OS  | T | T | T | F | T | T | 0.158  | 37% | T | T | 0.345 | F | No            | T | Weak |
| Xie X         | 2019 | NLR | Nivolumab                               | PFS | T | T | F | F | T | T | <0.001 | 87% | F | F | 0.068 | F | None Detected | F | Weak |
| Vartolomei MD | 2018 | NLR | Non muscle Invasive Bladder (High Risk) | RFS | T | F | F | F | T | T | 0.068  | 58% | F | T | 0.163 | F | None Detected | T | Weak |
| Vartolomei MD | 2018 | NLR | Non muscle Invasive Bladder (High Risk) | PFS | T | F | F | F | F | T | 0.413  | 0%  | F | F | 0.751 | T | No            | F | Weak |
| Wang Z        | 2019 | NLR | NSCLC (Chemotherapy)                    | PFS | T | T | T | F | T | F | 0.245  | 26% | F | T | 0.146 | F | Yes           | T | Weak |

|                   |      |     |                                      |     |   |   |   |    |   |   |        |     |   |   |       |   |               |   |      |
|-------------------|------|-----|--------------------------------------|-----|---|---|---|----|---|---|--------|-----|---|---|-------|---|---------------|---|------|
| Xie X             | 2019 | NLR | NSCLC (Immune Checkpoint Inhibitors) | PFS | T | F | F | F  | T | T | 0.003  | 72% | F | F | 0.018 | T | None Detected | F | Weak |
| Cao D             | 2018 | NLR | NSCLC (Nivoumab)                     | OS  | T | T | F | F  | T | T | <0.001 | 87% | F | F | 0.015 | T | None Detected | T | Weak |
| Cao D             | 2018 | NLR | NSCLC (Nivoumab)                     | PFS | T | F | F | F  | T | T | <0.001 | 86% | F | F | 0.008 | F | Yes           | F | Weak |
| Wang Z            | 2019 | NLR | NSCLC (TT)                           | OS  | T | F | F | F  | T | T | 0.001  | 77% | F | F | 0.025 | F | No (NM)       | F | Weak |
| Wang Z            | 2019 | NLR | NSCLC (TT)                           | PFS | T | F | F | F  | T | F | 0.003  | 75% | F | F | 0.034 | F | Yes           | F | Weak |
| Zhang X           | 2018 | NLR | Oesophageal                          | CSS | T | F | F | T  | T | T | 0.025  | 59% | F | F | 0.877 | T | No            | F | Weak |
| Zhang X           | 2018 | NLR | Oesophageal                          | RFS | T | F | F | F  | F | T | 0.187  | 40% | F | T | 0.675 | F | No            | F | Weak |
| Zhang X           | 2018 | NLR | Oesophageal                          | DFS | T | F | F | T  | T | F | <0.001 | 86% | F | F | 0.049 | F | No            | F | Weak |
| Zhang X           | 2018 | NLR | Oesophageal                          | PFS | T | T | F | F  | T | T | 0.484  | 0%  | F | F | 0.568 | T | No            | T | Weak |
| Pirozzolo G       | 2019 | NLR | Oesophageal (Neo+Surgery)            | OS  | T | F | F | T  | F | T | 0.493  | 0%  | F | T | 0.451 | F | No            | T | Weak |
| Wang Y            | 2018 | NLR | Oral SCC                             | DFS | T | F | F | T  | T | T | 0.629  | 0%  | T | T | 0.203 | F | No            | T | Weak |
| Yang L            | 2019 | NLR | Oropharynx                           | DFS | T | F | F | NA | F | T | 0.822  | 0%  | F | F | 0.670 | T | No            | T | Weak |
| Zhou Y            | 2018 | NLR | Pancreatic                           | DFS | T | F | F | T  | T | F | 0.003  | 67% | F | T | 0.370 | F | Yes           | F | Weak |
| Yang JJ           | 2015 | NLR | Pancreatic                           | CSS | T | F | F | F  | F | T | 0.012  | 78% | F | T | 0.424 | F | Yes           | F | Weak |
| Zhou Y            | 2018 | NLR | Pancreatic Neuroendocrine Tumour     | OS  | T | T | F | F  | F | T | 0.623  | 0%  | F | T | NA    | F | No            | F | Weak |
| Zhou Y            | 2018 | NLR | Pancreatic Neuroendocrine Tumour     | RFS | T | T | F | F  | F | T | 0.766  | 0%  | F | T | NA    | F | No            | F | Weak |
| Dong YW           | 2016 | NLR | Rectal                               | DFS | T | T | F | F  | F | T | 0.635  | 0%  | F | T | 0.538 | F | No            | T | Weak |
| Dong YW           | 2016 | NLR | Rectal                               | RFS | T | F | F | F  | F | T | 0.684  | 0%  | F | T | 0.545 | F | No            | T | Weak |
| Luo Y             | 2015 | NLR | Renal                                | RFS | T | T | F | F  | F | T | 0.364  | 1%  | F | F | 0.392 | T | No            | T | Weak |
| Shen M            | 2014 | IN  | Renal                                | OS  | T | T | T | F  | F | T | 0.411  | 0%  | F | F | NA    | T | No            | F | Weak |
| Semeniuk-Wojtas A | 2018 | NLR | Renal (TKI)                          | PFS | T | F | F | T  | T | T | <0.001 | 90% | F | T | 0.120 | F | Yes           | F | Weak |
| Boissier R        | 2017 | NLR | Renal Advanced                       | PFS | T | T | T | F  | F | T | 0.779  | 0%  | F | F | 0.981 | T | No            | T | Weak |
| Boissier R        | 2017 | NLR | Renal Localised                      | RFS | T | F | F | T  | T | F | <0.001 | 82% | F | F | 0.007 | F | Yes           | F | Weak |
| Li LQ             | 2020 | NLR | STS (Synovial Sarcoma)               | OS  | T | T | T | NA | F | T | 0.510  | 0%  | F | F | 0.464 | T | No            | T | Weak |
| Li LQ             | 2020 | NLR | STS (Liposarcoma)                    | OS  | T | T | F | NA | F | T | 0.952  | 0%  | F | T | NA    | F | No            | F | Weak |
| Luo Y             | 2015 | NLR | Upper Urinary                        | RFS | T | F | F | F  | F | T | 0.287  | 12% | F | T | NA    | F | None Detected | F | Weak |
| Su S              | 2019 | NLR | Urothelial                           | OS  | T | F | F | T  | T | F | 0.042  | 54% | F | F | 0.844 | T | No            | T | Weak |
| Vartolomei M      | 2018 | NLR | Urothelial                           | RFS | T | F | F | T  | T | F | 0.015  | 65% | F | F | 0.021 | F | Yes           | F | Weak |

|            |      |     |                                      |     |   |   |   |   |   |   |        |     |   |   |        |   |               |   |           |
|------------|------|-----|--------------------------------------|-----|---|---|---|---|---|---|--------|-----|---|---|--------|---|---------------|---|-----------|
| Suh J      | 2019 | NLR | Urothelial (Chemotherapy)            | PFS | T | F | F | F | F | T | 0.097  | 64% | F | F | NA     | T | No            | F | Weak      |
| Suh J      | 2019 | NLR | Urothelial (Radical Cystectomy)      | OS  | T | F | F | T | T | T | <0.001 | 84% | F | F | <0.001 | F | Yes           | F | Weak      |
| Suh J      | 2019 | NLR | Urothelial (Radical Cystectomy)      | PFS | T | F | F | T | T | T | <0.001 | 82% | F | F | 0.027  | T | None Detected | F | Weak      |
| Cao J      | 2016 | NLR | Prostate Localised                   | RFS | T | F | F | T | T | F | <0.001 | 90% | F | T | 0.351  | F | NA            | F | Weak      |
| Shen M     | 2014 | PN  | Composite endpoints                  | OS  | F | F | F | F | F | F | 0.005  | 87% | F | T | NA     | F | Yes           | F | Uncertain |
| Shen M     | 2014 | SN  | Composite endpoints                  | OS  | F | F | F | F | F | F | 0.129  | 57% | F | T | NA     | F | No (NM)       | F | Uncertain |
| Hu G       | 2019 | NLR | Bladder (Radical Cystectomy and NAC) | OS  | F | F | F | F | T | F | 0.296  | 19% | F | T | 0.475  | F | No (NM)       | F | Uncertain |
| Chen J     | 2018 | NLR | Breast (No Metastasis)               | OS  | F | F | F | F | F | F | <0.001 | 92% | F | T | NA     | F | No            | F | Uncertain |
| Chen J     | 2018 | NLR | Breast (No Metastasis)               | DFS | F | F | F | F | F | T | 0.439  | 0%  | F | T | NA     | F | No            | F | Uncertain |
| Shen M     | 2014 | IN  | Gastric                              | OS  | F | F | F | F | F | T | 0.011  | 84% | F | F | NA     | T | No            | F | Uncertain |
| Luo XF     | 2018 | NLR | Gastrointestinal Stromal             | OS  | F | F | F | F | F | T | 0.014  | 83% | F | T | NA     | F | Yes           | F | Uncertain |
| Xiao WK    | 2014 | NLR | Hepatocellular (RFA)                 | DFS | F | F | F | T | F | F | 0.333  | 0%  | F | T | NA     | T | No            | F | Uncertain |
| Shen M     | 2014 | IN  | NSCLC                                | OS  | F | F | F | F | F | F | 0.960  | 0%  | F | F | NA     | T | No            | F | Uncertain |
| Yin X      | 2016 | NLR | Prostate Localised                   | OS  | F | F | F | T | F | T | 0.039  | 76% | F | T | NA     | F | No            | F | Uncertain |
| Guan Y     | 2020 | NLR | Prostate CR (Abitaterone)            | PFS | F | F | F | F | F | T | 0.060  | 72% | F | F | NA     | T | No            | F | Uncertain |
| Guan Y     | 2020 | NLR | Prostate CR (Enzalutamide)           | PFS | F | F | F | F | F | T | 0.002  | 90% | F | F | NA     | T | No            | F | Uncertain |
| Luo Y      | 2015 | NLR | Renal                                | CSS | F | F | F | T | T | T | <0.001 | 86% | F | F | 0.534  | T | No            | F | Uncertain |
| Boissier R | 2017 | NLR | Renal Localised                      | OS  | F | F | F | T | F | T | 0.020  | 74% | F | T | 0.219  | F | Yes           | F | Uncertain |
| Feng J     | 2020 | NLR | Thyroid                              | DFS | F | F | F | T | T | T | 0.007  | 66% | F | F | 0.207  | T | No            | F | Uncertain |
| Su S       | 2019 | NLR | Urothelial                           | DFS | F | F | F | F | F | T | 0.119  | 59% | F | F | NA     | T | No            | F | Uncertain |

IA) Not applicable, (T) True, (F) False, (HR), Hazard ratio, (NLR) Neutrophil to lymphocyte ratio, (IN) Intratumoural neutrophils, (PN) Peritumoural neutrophils, (SN) Stromal Neutrophils, (OS) Overall Survival, (DFS) Disease-Free Survival, (FS) Progression-Free Survival, (RFS) Recurrence-Free Survival, (CSS) Cancer Specific Survival, (VEGFR) Vascular Endothelial Growth Factor Receptor, (PC) Palliative Chemotherapy, (SBR) Surgical Bowel Resection, (NAC) Neoadjuvant chemotherapy, (STS) Soft Tissue Sarcoma, (UTR) Urothelial Transurethral Resection, (SR) Surgical Resection, (GNT) Gastroenteropancreatic Neuroendocrine Tumors, (SCC) Squamous Cell Carcinoma, (ST) Systematic Therapy, (MT) Mixed therapy, (TT) Targeted Therapy, (CLM) Colorectal Liver Metastasis, (NS) Non-surgical, (ICC) Intrahepatic Cholangiocarcinoma, (RFA) Radiofrequency Ablation, (TACE) Trans-Arterial Chemoembolization, (MPM) Malignant Pleural esothelioma, (NSCLC) Non-Small Cell Lung Cancer, (NHC), Neck and Head Cancer, (UTUC) Upper Tract Urothelial Carcinoma, (DCRT) Definitive Chemoradiotherapy, (CR) Castration Resistant, (TKI) Tyrosine Kinase Inhibitor.

All-cancers are defined as a grouping of cancer diagnosis unrelated to site, stage or treatment unless otherwise specified.  
 \*review reported incomplete data on sample size.

ID) None detected – binomial probability test yielded a p-value>0.10.  
 lo) – no excess significance, observed<expected.  
 lo (NS)) - No excess significance, no observed significant studies.

|                |                       |
|----------------|-----------------------|
| Meets criteria | Doesn't meet criteria |
|----------------|-----------------------|

## Appendix J: Effect size upgrading of GRADE

| Author            | Year | Biomarker | Cancer site                                  | meta-analysis metric | Significance |                         |                         | Sample Size |            | HR   | Lower CI | Upper CI | Level of Evidence | Up-GRADE |
|-------------------|------|-----------|----------------------------------------------|----------------------|--------------|-------------------------|-------------------------|-------------|------------|------|----------|----------|-------------------|----------|
|                   |      |           |                                              |                      | Sig at <0.05 | Sig at 10 <sup>-4</sup> | Sig at 10 <sup>-6</sup> | >1000 Ind.  | >3 Studies |      |          |          |                   |          |
| Jiang T           | 2018 | NLR       | Advanced Cancer (Anti-VEGFR)                 | OS                   | T            | T                       | T                       | T           | T          | 2.02 | 1.61     | 2.53     | Highly            | Strong   |
| Paramanathan A    | 2014 | NLR       | Composite endpoints                          | DFS                  | T            | T                       | T                       | T           | T          | 2.11 | 1.71     | 2.6      | Highly            | Strong   |
| Suh J             | 2019 | NLR       | Bladder (UTR)                                | RFS                  | T            | T                       | T                       | T           | T          | 2.22 | 1.81     | 2.74     | Strong            | Strong   |
| Ethier JL         | 2017 | NLR       | Breast                                       | OS                   | T            | T                       | T                       | T           | T          | 2.54 | 1.96     | 3.30     | Highly            | Strong   |
| Duan J            | 2018 | NLR       | Breast (SR)                                  | OS                   | T            | T                       | T                       | T           | T          | 2.47 | 1.71     | 3.56     | Highly            | Strong   |
| Tang H            | 2016 | NLR       | CLM                                          | OS                   | T            | T                       | T                       | T           | T          | 2.17 | 1.83     | 2.57     | Highly            | Strong   |
| Tang H            | 2016 | NLR       | CLM (SR)                                     | OS                   | T            | T                       | T                       | T           | T          | 2.08 | 1.73     | 2.49     | Highly            | Strong   |
| Ni L              | 2020 | NLR       | Endometrial                                  | OS                   | T            | T                       | T                       | T           | T          | 2.22 | 1.76     | 2.79     | Strong            | Strong   |
| Szor D            | 2018 | NLR       | Gastric (SR)                                 | OS                   | T            | T                       | T                       | T           | T          | 3.13 | 1.99     | 4.92     | Highly            | Strong   |
| Tan Q             | 2018 | NLR       | Immunotherapy (Immune checkpoint inhibitors) | OS                   | T            | T                       | T                       | T           | T          | 2.21 | 1.70     | 2.88     | Highly            | Strong   |
| Xie X             | 2019 | NLR       | Melanoma (Immune checkpoint inhibitors)      | OS                   | T            | T                       | T                       | T           | T          | 2.49 | 1.72     | 3.61     | Highly            | Strong   |
| Yang S            | 2019 | NLR       | Nasopharyngeal                               | OS                   | T            | T                       | T                       | T           | T          | 1.48 | 1.29     | 1.69     | Strong            | Strong   |
| Yin J             | 2017 | NLR       | Nasopharyngeal                               | PFS                  | T            | T                       | T                       | T           | T          | 1.50 | 1.30     | 1.73     | Strong            | Strong   |
| Vartolomei MD     | 2018 | NLR       | Non muscle Invasive Bladder                  | PFS                  | T            | T                       | T                       | T           | T          | 2.26 | 1.59     | 3.22     | Strong            | Strong   |
| Jiang T           | 2019 | NLR       | NSCLC (PD-1 inhibitor)                       | OS                   | T            | T                       | T                       | T           | T          | 2.59 | 2.1      | 3.2      | Highly            | Strong   |
| Yin X             | 2016 | NLR       | Prostate CR                                  | OS                   | T            | T                       | T                       | T           | T          | 1.56 | 1.42     | 1.72     | Strong            | Strong   |
| Semeniuk-Wojtas A | 2018 | NLR       | Renal (TKI)                                  | OS                   | T            | T                       | T                       | T           | T          | 2.14 | 1.66     | 2.76     | Highly            | Strong   |
| Li LQ             | 2020 | NLR       | STS                                          | DFS                  | T            | T                       | T                       | T           | T          | 1.72 | 1.43     | 2.08     | Strong            | Strong   |
| Jiang T           | 2018 | NLR       | Advanced Cancer (Immunotherapy)              | PFS                  | T            | T                       | T                       | T           | T          | 1.78 | 1.47     | 2.15     | Highly            | Highly   |
| Mei Z             | 2017 | NLR       | Composite endpoints                          | PFS                  | T            | T                       | T                       | T           | T          | 1.63 | 1.43     | 1.86     | Highly            | Highly   |
| Tang H            | 2017 | NLR       | Biliary Tract                                | OS                   | T            | T                       | T                       | T           | T          | 1.52 | 1.36     | 1.70     | Highly            | Highly   |
| Wu S              | 2018 | NLR       | Bladder                                      | RFS                  | T            | T                       | T                       | T           | T          | 1.52 | 1.29     | 1.79     | Highly            | Highly   |
| Chen J            | 2018 | NLR       | Breast (Metastasis)                          | DFS                  | T            | T                       | T                       | T           | F          | 2.15 | 1.53     | 3.01     | Highly            | Highly   |
| Guo W             | 2019 | NLR       | Breast (Triple Negative and Her2 Positive)   | DFS                  | T            | T                       | T                       | T           | T          | 1.59 | 1.41     | 1.8      | Highly            | Highly   |

|             |      |     |                                              |     |   |   |   |   |   |      |      |      |        |        |
|-------------|------|-----|----------------------------------------------|-----|---|---|---|---|---|------|------|------|--------|--------|
| Zheng DC    | 2016 | NLR | Colorectal                                   | OS  | T | T | T | T | T | 1.92 | 1.58 | 2.32 | Highly | Highly |
| Tang H      | 2016 | NLR | CLM                                          | RFS | T | T | T | T | T | 1.97 | 1.48 | 2.62 | Highly | Highly |
| Sun J       | 2016 | NLR | Gastric                                      | OS  | T | T | T | T | T | 1.98 | 1.75 | 2.23 | Highly | Highly |
| Ethier JL   | 2017 | NLR | Gynecologic                                  | OS  | T | T | T | T | T | 1.72 | 1.46 | 2.03 | Highly | Highly |
| Tham T      | 2018 | NLR | Head and Neck                                | OS  | T | T | T | T | T | 1.72 | 1.51 | 1.96 | Highly | Highly |
| Min GT      | 2018 | NLR | Hepatocellular                               | OS  | T | T | T | T | T | 1.64 | 1.41 | 1.90 | Highly | Highly |
| Min GT      | 2018 | NLR | Hepatocellular                               | DFS | T | T | T | T | T | 1.82 | 1.40 | 2.37 | Highly | Highly |
| Min GT      | 2018 | NLR | Hepatocellular                               | RFS | T | T | T | T | T | 1.85 | 1.48 | 2.32 | Highly | Highly |
| Liu L       | 2019 | NLR | Hepatocellular (Sorfenib)                    | OS  | T | T | T | T | T | 1.73 | 1.45 | 2.07 | Highly | Highly |
| Wang Y      | 2018 | NLR | Hepatocellular (SR)                          | RFS | T | T | T | T | T | 1.71 | 1.45 | 2.03 | Highly | Highly |
| Wang Y      | 2018 | NLR | Hepatocellular (SR)                          | OS  | T | T | T | T | T | 1.6  | 1.39 | 1.84 | Highly | Highly |
| Wang Y      | 2018 | NLR | Hepatocellular (SR)                          | DFS | T | T | T | T | T | 1.5  | 1.35 | 1.67 | Highly | Highly |
| Li S        | 2020 | NLR | Hepatocellular (TACE)                        | OS  | T | T | T | T | T | 1.85 | 1.64 | 2.08 | Highly | Highly |
| Jiang T     | 2018 | NLR | Immunotherapy (Advanced Cancer)              | OS  | T | T | T | T | T | 1.95 | 1.67 | 2.29 | Highly | Highly |
| Tan Q       | 2018 | NLR | Immunotherapy (Immune checkpoint inhibitors) | PFS | T | T | T | T | T | 1.75 | 1.39 | 2.21 | Highly | Highly |
| Zhao QT     | 2015 | NLR | Lung (both)                                  | OS  | T | T | T | T | T | 1.55 | 1.33 | 1.80 | Highly | Highly |
| Li X        | 2018 | NLR | NAC                                          | OS  | T | T | T | T | T | 1.66 | 1.36 | 2.04 | Highly | Highly |
| Gu XB       | 2015 | NLR | NSCLC                                        | PFS | T | T | T | T | T | 1.59 | 1.29 | 1.95 | Highly | Highly |
| Jiang T     | 2019 | NLR | NSCLC (PD-1 inhibitor)                       | PFS | T | T | T | T | T | 1.63 | 1.42 | 1.87 | Highly | Highly |
| Wang Z      | 2019 | NLR | NSCLC (ST)                                   | PFS | T | T | T | T | T | 1.5  | 1.29 | 1.74 | Highly | Highly |
| Zhang X     | 2018 | NLR | Oesophageal                                  | OS  | T | T | T | T | T | 1.5  | 1.32 | 1.71 | Highly | Highly |
| Pirozzolo G | 2019 | NLR | Oesophageal (DCRT)                           | OS  | T | T | T | T | F | 1.74 | 1.55 | 1.95 | Highly | Highly |
| Zhang X     | 2018 | NLR | Oesophageal (Surgery)                        | OS  | T | T | T | T | T | 1.48 | 1.27 | 1.73 | Highly | Highly |
| Pirozzolo G | 2019 | NLR | Oesophageal (Surgery+/-Chemo)                | OS  | T | T | T | T | T | 1.77 | 1.43 | 2.2  | Highly | Highly |
| Zhang X     | 2018 | NLR | Oesophageal SCC                              | OS  | T | T | T | T | T | 1.39 | 1.22 | 1.58 | Highly | Highly |
| Yang Y      | 2018 | NLR | Oral cavity                                  | OS  | T | T | T | T | T | 1.71 | 1.42 | 2.06 | Highly | Highly |
| Yang Y      | 2018 | NLR | Oral cavity                                  | DFS | T | T | T | T | T | 1.72 | 1.44 | 2.07 | Highly | Highly |
| Zhou Y      | 2018 | NLR | Pancreatic                                   | OS  | T | T | T | T | T | 1.81 | 1.59 | 2.05 | Highly | Highly |
| Mowbray N   | 2018 | NLR | Pancreatic (SR)                              | OS  | T | T | T | T | T | 1.72 | 1.48 | 2.00 | Highly | Highly |



|            |      |     |                            |     |   |   |   |   |   |      |      |      |        |        |
|------------|------|-----|----------------------------|-----|---|---|---|---|---|------|------|------|--------|--------|
| Guo J      | 2018 | NLR | Prostate                   | PFS | T | T | T | T | T | 1.97 | 1.49 | 2.62 | Highly | Highly |
| Guo J      | 2018 | NLR | Prostate (Metastatic)      | OS  | T | T | T | T | T | 1.67 | 1.38 | 2.02 | Highly | Highly |
| Guan Y     | 2020 | NLR | Prostate CR (Enzalutamide) | OS  | T | T | T | T | T | 1.48 | 1.26 | 1.76 | Highly | Highly |
| Luo Y      | 2015 | NLR | Renal                      | OS  | T | T | T | T | T | 1.92 | 1.63 | 2.27 | Highly | Highly |
| Boissier R | 2017 | NLR | Renal Advanced             | OS  | T | T | T | T | T | 1.91 | 1.44 | 2.53 | Highly | Highly |
| Liu G      | 2018 | NLR | STS                        | OS  | T | T | T | T | T | 1.56 | 1.3  | 1.88 | Highly | Highly |
| Suh J      | 2019 | NLR | Urothelial (Chemotherapy)  | OS  | T | T | T | T | T | 1.45 | 1.27 | 1.65 | Highly | Highly |

(NA) Not applicable, (T) True, (F) False, (HR), Hazard ratio, (NLR) Neutrophil to lymphocyte ratio, (IN) Intratumoural neutrophils, (PN) Peritumoural neutrophils, (SN) Stromal Neutrophils, (OS) Overall Survival, (DFS) Disease-Free Survival, (PFS) Progression-Free Survival, (RFS) Recurrence-Free Survival, (CSS) Cancer Specific Survival, (VEGFR) Vascular Endothelial Growth Factor Receptor, (PC) Palliative Chemotherapy, (SBR) Surgical Bowel Resection, (NAC) Neoadjuvant Chemotherapy, (STS) Soft Tissue Sarcoma, (UTR) Urothelial Transurethral Resection, (SR) Surgical Resection, (GNT) Gastroenteropancreatic Neuroendocrine Tumors, (SCC) Squamous Cell Carcinoma, (ST) Systematic Therapy, (MT) Mixed Therapy, (TT) Targeted Therapy, (CLM) Colorectal Liver Metastasis, (NS) Non-surgical, (ICC) Intrahepatic Cholangiocarcinoma, (RFA) Radiofrequency Ablation, (TACE) Trans-Arterial Chemoembolization, (MPM) Malignant Pleural Mesothelioma, (NSCLC) Non-Small Cell Lung Cancer, (NHC), Neck and Head Cancer, (UTUC) Upper Tract Urothelial Carcinoma, (DCRT) Definitive Chemoradiotherapy, (CR) Castration Resistant, (TKI) Tyrosine Kinase Inhibitor.

\*All-cancers are defined as a grouping of cancer diagnosis unrelated to site, stage or treatment unless otherwise specified.

†review reported incomplete data on sample size.

|                |                       |
|----------------|-----------------------|
| Meets criteria | Doesn't meet criteria |
|----------------|-----------------------|

### Appendix K: Sensitivity analysis of GRADE

| Author         | Year | Biomarker | Cancer site                                | meta-analysis metric | Significance |                         |                         | Sample Size |     | Largest Study Sig. at <0.05 | Pred. Sig. | No Small Study Effects |              |                  | Excess Sig. | 10% Cred. Ceiling Sig. | Level of Evidence |
|----------------|------|-----------|--------------------------------------------|----------------------|--------------|-------------------------|-------------------------|-------------|-----|-----------------------------|------------|------------------------|--------------|------------------|-------------|------------------------|-------------------|
|                |      |           |                                            |                      | Sig at <0.05 | Sig at 10 <sup>-4</sup> | Sig at 10 <sup>-6</sup> | >1000 Ind.  | N>3 |                             |            | T/F                    | ARC-Thompson | Largest > Random |             |                        |                   |
| Suh J          | 2019 | NLR       | Bladder (UTR)                              | RFS                  | T            | T                       | T                       | T           | T   | T                           | T          | 0.180                  | F            | No               | T           | Strong                 |                   |
| Ni L           | 2020 | NLR       | Endometrial                                | OS                   | T            | T                       | T                       | T           | T   | T                           | T          | 0.261                  | F            | No               | T           | Strong                 |                   |
| Sun J          | 2016 | NLR       | Gastric                                    | OS                   | T            | T                       | T                       | T           | T   | T                           | T          | 0.105                  | F            | None Detected    | T           | Strong                 |                   |
| Yang S         | 2019 | NLR       | Nasopharyngeal                             | OS                   | T            | T                       | T                       | T           | T   | T                           | T          | 0.171                  | F            | No               | T           | Strong                 |                   |
| Yin J          | 2017 | NLR       | Nasopharyngeal                             | PFS                  | T            | T                       | T                       | T           | T   | T                           | T          | 0.183                  | F            | No               | T           | Strong                 |                   |
| Vartolomei MD  | 2018 | NLR       | Non muscle Invasive Bladder                | PFS                  | T            | T                       | T                       | T           | T   | T                           | T          | 0.149                  | F            | No               | T           | Strong                 |                   |
| Yin X          | 2016 | NLR       | Prostate CR                                | OS                   | T            | T                       | T                       | T           | T   | T                           | T          | 0.340                  | F            | None Detected    | T           | Strong                 |                   |
| Li LQ          | 2020 | NLR       | STS                                        | DFS                  | T            | T                       | T                       | T           | T   | T                           | T          | 0.125                  | F            | No               | T           | Strong                 |                   |
| Jiang T        | 2018 | NLR       | Advanced Cancer (Anti-VEGFR)               | OS                   | T            | T                       | T                       | T           | T   | F                           | F          | 0.016                  | T            | No               | T           | Highly                 |                   |
| Jiang T        | 2018 | NLR       | Advanced Cancer (Immunotherapy)            | PFS                  | T            | T                       | T                       | T           | T   | F                           | F          | 0.002                  | F            | None Detected    | T           | Highly                 |                   |
| Mei Z          | 2017 | NLR       | Composite endpoints                        | PFS                  | T            | T                       | T                       | T           | T   | F                           | F          | 0.001                  | T            | No               | T           | Highly                 |                   |
| Paramanathan A | 2014 | NLR       | Composite endpoints                        | DFS                  | T            | T                       | T                       | T           | T   | F                           | F          | <0.001                 | F            | Yes              | T           | Highly                 |                   |
| Tang H         | 2017 | NLR       | Biliary Tract                              | OS                   | T            | T                       | T                       | T           | T   | T                           | T          | 0.154                  | F            | Yes              | T           | Highly                 |                   |
| Wu S           | 2018 | NLR       | Bladder                                    | RFS                  | T            | T                       | T                       | T           | T   | F                           | F          | 0.005                  | F            | Yes              | T           | Highly                 |                   |
| Ethier JL      | 2017 | NLR       | Breast                                     | OS                   | T            | T                       | T                       | T           | T   | T                           | F          | 0.001                  | F            | None Detected    | T           | Highly                 |                   |
| Chen J         | 2018 | NLR       | Breast (Metastasis)                        | DFS                  | T            | T                       | T                       | T           | F   | F                           | F          | 0.862                  | T            | No               | T           | Highly                 |                   |
| Duan J         | 2018 | NLR       | Breast (SR)                                | OS                   | T            | T                       | T                       | T           | T   | F                           | F          | 0.219                  | T            | No               | T           | Highly                 |                   |
| Guo W          | 2019 | NLR       | Breast (Triple Negative and Her2 Positive) | DFS                  | T            | T                       | T                       | T           | T   | T                           | F          | 0.015                  | F            | No               | T           | Highly                 |                   |
| Zheng DC       | 2016 | NLR       | Colorectal                                 | OS                   | T            | T                       | T                       | T           | T   | F                           | F          | 0.010                  | F            | None Detected    | T           | Highly                 |                   |
| Tang H         | 2016 | NLR       | CLM                                        | OS                   | T            | T                       | T                       | T           | T   | T                           | F          | 0.246                  | T            | No               | T           | Highly                 |                   |
| Tang H         | 2016 | NLR       | CLM                                        | RFS                  | T            | T                       | T                       | T           | T   | F                           | F          | 0.455                  | T            | No               | T           | Highly                 |                   |
| Tang H         | 2016 | NLR       | CLM (SR)                                   | OS                   | T            | T                       | T                       | T           | T   | T                           | F          | 0.713                  | T            | No               | T           | Highly                 |                   |
| Szor D         | 2018 | NLR       | Gastric (SR)                               | OS                   | T            | T                       | T                       | T           | T   | F                           | F          | 0.737                  | T            | No               | T           | Highly                 |                   |
| Ethier JL      | 2017 | NLR       | Gynecologic                                | OS                   | T            | T                       | T                       | T           | T   | F                           | F          | <0.001                 | F            | None Detected    | T           | Highly                 |                   |
| Tham T         | 2018 | NLR       | Head and Neck                              | OS                   | T            | T                       | T                       | T           | T   | T                           | F          | < 0.001                | F            | No               | T           | Highly                 |                   |
| Min GT         | 2018 | NLR       | Hepatocellular                             | OS                   | T            | T                       | T                       | T           | T   | F                           | F          | <0.001                 | F            | Yes              | T           | Highly                 |                   |

|             |      |     |                                              |     |   |   |   |   |   |   |   |   |        |   |               |   |        |
|-------------|------|-----|----------------------------------------------|-----|---|---|---|---|---|---|---|---|--------|---|---------------|---|--------|
| Min GT      | 2018 | NLR | Hepatocellular                               | DFS | T | T | T | T | T | T | F | F | <0.001 | F | None Detected | T | Highly |
| Min GT      | 2018 | NLR | Hepatocellular                               | RFS | T | T | T | T | T | T | F | F | 0.001  | F | None Detected | T | Highly |
| Liu L       | 2019 | NLR | Hepatocellular (Sorfenib)                    | OS  | T | T | T | T | T | T | T | F | 0.001  | T | No            | T | Highly |
| Wang Y      | 2018 | NLR | Hepatocellular (SR)                          | RFS | T | T | T | T | T | T | T | F | 0.079  | F | None Detected | T | Highly |
| Wang Y      | 2018 | NLR | Hepatocellular (SR)                          | OS  | T | T | T | T | T | T | T | F | 0.010  | F | None Detected | T | Highly |
| Wang Y      | 2018 | NLR | Hepatocellular (SR)                          | DFS | T | T | T | T | T | T | T | F | 0.052  | F | Yes           | T | Highly |
| Li S        | 2020 | NLR | Hepatocellular (TACE)                        | OS  | T | T | T | T | T | T | T | F | 0.031  | F | Yes           | T | Highly |
| Jiang T     | 2018 | NLR | Immunotherapy (Advanced Cancer)              | OS  | T | T | T | T | T | T | T | F | 0.009  | T | No            | T | Highly |
| Tan Q       | 2018 | NLR | Immunotherapy (Immune checkpoint inhibitors) | OS  | T | T | T | T | T | T | F | F | <0.001 | F | No            | T | Highly |
| Tan Q       | 2018 | NLR | Immunotherapy (Immune checkpoint inhibitors) | PFS | T | T | T | T | T | T | F | F | <0.001 | F | Yes           | T | Highly |
| Zhao QT     | 2015 | NLR | Lung (both)                                  | OS  | T | T | T | T | T | T | F | F | 0.001  | T | None Detected | T | Highly |
| Xie X       | 2019 | NLR | Melanoma (Immune checkpoint inhibitors)      | OS  | T | T | T | T | T | T | F | F | 0.050  | F | None Detected | T | Highly |
| Li X        | 2018 | NLR | NAC                                          | OS  | T | T | T | T | T | T | F | F | <0.001 | T | No            | T | Highly |
| Gu XB       | 2015 | NLR | NSCLC                                        | PFS | T | T | T | T | T | T | F | F | <0.001 | F | None Detected | T | Highly |
| Jiang T     | 2019 | NLR | NSCLC (PD-1 inhibitor)                       | OS  | T | T | T | T | T | T | T | F | 0.006  | F | Yes           | T | Highly |
| Jiang T     | 2019 | NLR | NSCLC (PD-1 inhibitor)                       | PFS | T | T | T | T | T | T | T | F | 0.742  | T | No            | T | Highly |
| Wang Z      | 2019 | NLR | NSCLC (ST)                                   | PFS | T | T | T | T | T | T | F | F | <0.001 | F | None Detected | T | Highly |
| Zhang X     | 2018 | NLR | Oesophageal                                  | OS  | T | T | T | T | T | T | F | F | 0.039  | T | No            | T | Highly |
| Pirozzolo G | 2019 | NLR | Oesophageal (DCRT)                           | OS  | T | T | T | T | F | T | F | T | 0.513  | F | No            | T | Highly |
| Zhang X     | 2018 | NLR | Oesophageal (Surgery)                        | OS  | T | T | T | T | T | T | F | F | 0.076  | T | No            | T | Highly |
| Pirozzolo G | 2019 | NLR | Oesophageal (Surgery+/-Chemo)                | OS  | T | T | T | T | T | T | F | T | 0.225  | F | None Detected | T | Highly |
| Zhang X     | 2018 | NLR | Oesophageal SCC                              | OS  | T | T | T | T | T | T | F | F | 0.331  | T | No            | T | Highly |
| Yang Y      | 2018 | NLR | Oral cavity                                  | OS  | T | T | T | T | T | T | T | F | 0.747  | T | No            | T | Highly |
| Yang Y      | 2018 | NLR | Oral cavity                                  | DFS | T | T | T | T | T | T | T | F | 0.045  | T | No            | T | Highly |
| Zhou Y      | 2018 | NLR | Pancreatic                                   | OS  | T | T | T | T | T | T | F | F | <0.001 | F | Yes           | T | Highly |
| Mowbray N   | 2018 | NLR | Pancreatic (SR)                              | OS  | T | T | T | T | T | T | T | F | 0.054  | F | None Detected | T | Highly |
| Guo J       | 2018 | NLR | Prostate                                     | PFS | T | T | T | T | T | T | T | F | 0.178  | T | No            | T | Highly |
| Guo J       | 2018 | NLR | Prostate (Metastatic)                        | OS  | T | T | T | T | T | T | T | F | 0.023  | F | Yes           | T | Highly |
| Guan Y      | 2020 | NLR | Prostate CR (Enzalutamide)                   | OS  | T | T | T | T | T | T | F | T | 0.110  | F | None Detected | T | Highly |

|                   |      |     |                           |    |   |   |   |   |   |   |   |   |       |   |               |   |        |
|-------------------|------|-----|---------------------------|----|---|---|---|---|---|---|---|---|-------|---|---------------|---|--------|
| Luo Y             | 2015 | NLR | Renal                     | OS | T | T | T | T | T | T | T | F | 0.017 | F | None Detected | T | Highly |
| Semeniuk-Wojtas A | 2018 | NLR | Renal (TKI)               | OS | T | T | T | T | T | T | T | T | 0.385 | F | Yes           | T | Highly |
| Boissier R        | 2017 | NLR | Renal Advanced            | OS | T | T | T | T | T | T | F | F | 0.009 | T | None Detected | T | Highly |
| Liu G             | 2018 | NLR | STS                       | OS | T | T | T | T | T | T | F | F | 0.018 | T | No            | T | Highly |
| Suh J             | 2019 | NLR | Urothelial (Chemotherapy) | OS | T | T | T | T | T | T | T | F | 0.131 | T | None Detected | T | Highly |

(A) Not applicable, (T) True, (F) False, (HR) Hazard ratio, (NLR) Neutrophil to lymphocyte ratio, (IN) Intratumoural neutrophils, (PN) Peritumoural neutrophils, (SN) Stromal Neutrophils, (OS) Overall Survival, (DFS) Disease-Free Survival, (FS) Progression-Free Survival, (RFS) Recurrence-Free Survival, (CSS) Cancer Specific Survival, (VEGFR) Vascular Endothelial Growth Factor Receptor, (PC) Palliative Chemotherapy, (SBR) Surgical Bowel Resection, (NAC) Neoadjuvant chemotherapy, (STS) Soft Tissue Sarcoma, (UTR) Urothelial Transurethral Resection, (SR) Surgical Resection, (GNT) Gastroenteropancreatic Neuroendocrine Tumors, (SCC) Squamous Cell Carcinoma, (ST) Systematic Therapy, (MT) Mixed therapy, (TT) Targeted Therapy, (CLM) Colorectal Liver Metastasis, (NS) Non-surgical, (ICC) Intrahepatic Cholangiocarcinoma, (RFA) Radiofrequency Ablation, (TACE) Trans-Arterial Chemoembolization, (MPM) Malignant Pleural mesothelioma, (NSCLC) Non-Small Cell Lung Cancer, (NHC), Neck and Head Cancer, (UTUC) Upper Tract Urothelial Carcinoma, (DCRT) Definitive Chemoradiotherapy, (CR) Castration Resistant, (TKI) Tyrosine Kinase Inhibitor. All-cancers are defined as a grouping of cancer diagnosis unrelated to site, stage or treatment unless otherwise specified.

review reported incomplete data on sample size.

(D) None detected – binomial probability test yielded a p-value>0.10.

lo) – no excess significance, observed<expected.

lo (NS)) - No excess significance, no observed significant studies.

|                |                       |
|----------------|-----------------------|
| Meets criteria | Doesn't meet criteria |
|----------------|-----------------------|

# Appendix L: Ranking based in precision versus effect size

Appendix 12 Figure 1 – Inverse Standard Error versus log(Hazard Ratio)

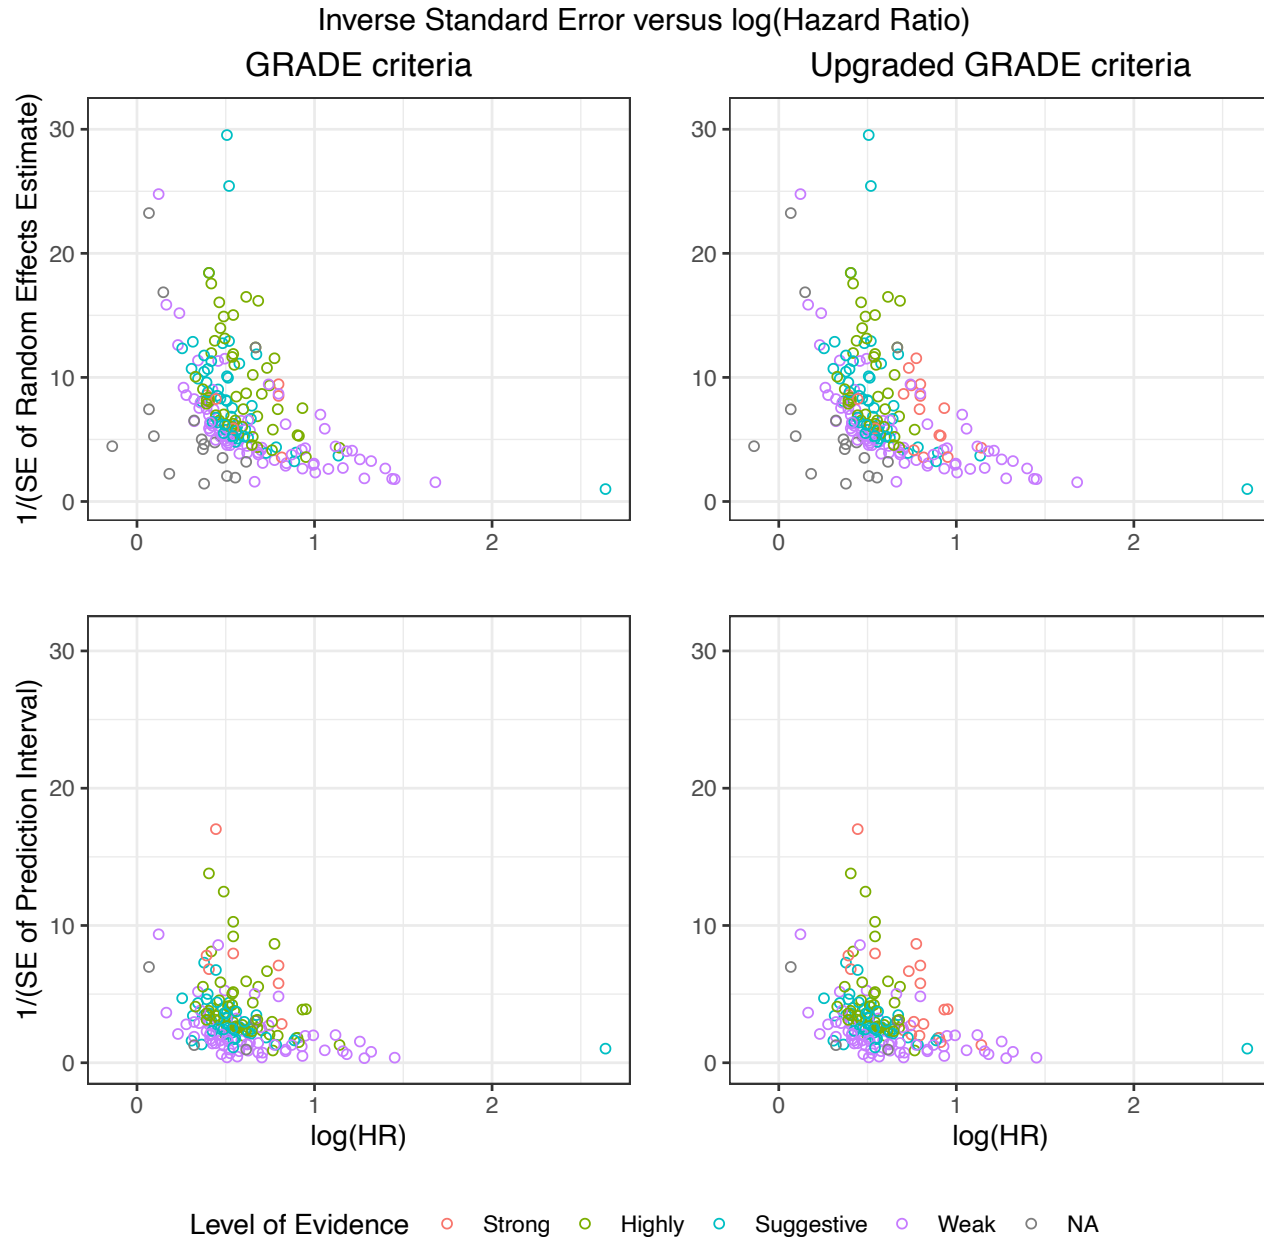

**Appendix 12 Table 1 – Ranking of evidence comparison**

| Study          | Association                                          | GRADE      | Upgrade    | Funnel Rank (sePI) | Funnel Rank (seCI) |
|----------------|------------------------------------------------------|------------|------------|--------------------|--------------------|
| Dolan R        | NLR-Composite endpoints Operable (OS)                | Suggestive | Suggestive | 50                 | 1                  |
| Mei Z          | NLR-Composite endpoints (OS)                         | Suggestive | Suggestive | 40                 | 2                  |
| Hu G           | NLR-Bladder (Radical Cystectomy) (OS)                | Weak       | Weak       | 5                  | 3                  |
| Hu G           | NLR-Bladder (Radical Cystectomy and NAC) (OS)        | Uncertain  | Uncertain  | 14                 | 4                  |
| Wang Y         | NLR-Hepatocellular (SR) (DFS)                        | Highly     | Highly     | 2                  | 5                  |
| Dolan R        | NLR-Composite endpoints Operable (CSS)               | Suggestive | Suggestive | 52                 | 6                  |
| Tang H         | NLR-Biliary Tract (OS)                               | Highly     | Highly     | 9                  | 7                  |
| Shen M         | IN-NSCLC (OS)                                        | Uncertain  | Uncertain  | 180                | 8                  |
| Shuangshuang L | NLR-Hepatocellular (TACE) (OS)                       | Highly     | Highly     | 18                 | 9                  |
| Sun J          | NLR-Gastric (OS)                                     | Highly     | Highly     | 22                 | 10                 |
| Guo W          | NLR-Breast (Triple Negative and Her2 Positive) (DFS) | Highly     | Highly     | 32                 | 11                 |
| Suh J          | NLR-Urothelial (Radical Cystectomy) (PFS)            | Weak       | Weak       | 49                 | 12                 |
| Xiao WK        | NLR-Hepatocellular (RFA) (OS)                        | Weak       | Weak       | 182                | 13                 |
| Tham T         | NLR-Head and Neck (OS)                               | Highly     | Highly     | 25                 | 14                 |
| Mei Z          | NLR-Composite endpoints (PFS)                        | Highly     | Highly     | 54                 | 15                 |
| Wang Y         | NLR-Hepatocellular (SR) (OS)                         | Highly     | Highly     | 19                 | 16                 |
| Min GT         | NLR-Hepatocellular (OS)                              | Highly     | Highly     | 114                | 17                 |
| Zhao QT        | NLR-Lung (both) (OS)                                 | Highly     | Highly     | 64                 | 18                 |
| Li X           | NLR-Bladder and Upper Urinary (PFS)                  | Suggestive | Suggestive | 35                 | 19                 |
| Hu G           | NLR-Bladder (OS)                                     | Suggestive | Suggestive | 59                 | 20                 |
| Li X           | NLR-Bladder and Upper Urinary (CSS)                  | Suggestive | Suggestive | 42                 | 21                 |
| Pirozzolo G    | NLR-Oesophageal (Neo+Surgery) (OS )                  | Weak       | Weak       | 113                | 22                 |
| Jiang T        | NLR-Advanced Cancer (Immunotherapy) (PFS)            | Highly     | Highly     | 69                 | 23                 |
| Jiang T        | NLR-Immunotherapy (Advanced Cancer) (OS)             |            |            | 70                 | 24                 |
| Mori K         | NLR-UTUC (Radical Cystectomy) (CSS)                  | Suggestive | Suggestive | 30                 | 25                 |
| Wu S           | NLR-Bladder (RFS)                                    | Highly     | Highly     | 41                 | 26                 |
| Ethier JL      | NLR-Gynecologic (OS)                                 | Highly     | Highly     | 75                 | 27                 |
| Cho J          | NLR-Head and Neck (SCC) (OS)                         | Suggestive | Suggestive | 56                 | 28                 |
| Yang L         | NLR-Head and Neck (SCC) (CSS)                        | Suggestive | Suggestive | 12                 | 29                 |
| Wang Y         | NLR-Hepatocellular (SR) (RFS)                        | Highly     | Highly     | 26                 | 30                 |
| Tang H         | NLR-CLM (OS)                                         | Highly     | Strong     | 7                  | 31                 |
| Wu S           | NLR-Bladder (Metastasis) (OS)                        | Weak       | Weak       | 23                 | 32                 |
| Tang H         | NLR-Biliary Tract (RFS)                              | Weak       | Weak       | 24                 | 33                 |

|                |                                                        |            |            |     |    |
|----------------|--------------------------------------------------------|------------|------------|-----|----|
| Sun J          | NLR-Gastric (DFS)                                      | Weak       | Weak       | 8   | 34 |
| Lei Y          | NLR-Glioma (OS)                                        | Suggestive | Suggestive | 68  | 35 |
| Guo W          | NLR-Breast (Triple Negative and Her2 Positive) (OS)    | Suggestive | Suggestive | 90  | 36 |
| Liu L          | NLR-Hepatocellular (Sorfenib) (OS)                     | Highly     | Highly     | 47  | 37 |
| Tang H         | NLR-CLM (SR) (OS)                                      | Highly     | Strong     | 17  | 38 |
| Yang L         | NLR-Larynx (DFS )                                      | Suggestive | Suggestive | 136 | 39 |
| Yu Y           | NLR-Lung (Surgery) (OS)                                | Suggestive | Suggestive | 55  | 40 |
| Wu J           | NLR-Cervical (OS)                                      | Suggestive | Suggestive | 57  | 41 |
| Zheng DC       | NLR-Colorectal (OS)                                    | Highly     | Highly     | 80  | 42 |
| Shen M         | IN-Composite endpoints (OS)                            | Suggestive | Suggestive | 83  | 43 |
| Zhang X        | NLR-Oesophageal SCC (OS )                              | Highly     | Highly     | 39  | 44 |
| Li H           | NLR-Colorectal (SR) (OS)                               | Suggestive | Suggestive | 61  | 45 |
| Lu Y           | NLR-NSCLC (OS)                                         | Suggestive | Suggestive | 36  | 46 |
| Tham T         | NLR-Head and Neck (No Surgery) (OS)                    | Suggestive | Suggestive | 31  | 47 |
| Suh J          | NLR-Bladder (UTR) (RFS)                                | Strong     | Strong     | 20  | 48 |
| Xie X          | NLR-Melanoma (Immune checkpoint inhibitors) (PFS)      | Weak       | Weak       | 84  | 49 |
| Paramanathan A | NLR-Composite endpoints (DFS)                          | Highly     | Strong     | 116 | 50 |
| Suh J          | NLR-Urothelial (Chemotherapy) (PFS)                    | Weak       | Weak       | 183 | 51 |
| Suh J          | NLR-Urothelial (Chemotherapy) (OS)                     | Highly     | Highly     | 21  | 52 |
| Duan J         | NLR-Breast (SR) (DFS)                                  | Suggestive | Suggestive | 87  | 53 |
| Malietzis G    | NLR-Colorectal (PC) (DFS)                              | Weak       | Weak       | 143 | 54 |
| Cao J          | NLR-Prostate (OS)                                      | Suggestive | Suggestive | 28  | 55 |
| Min GT         | NLR-Hepatocellular (RFS)                               | Highly     | Highly     | 103 | 56 |
| Ding Y         | NLR-Melanoma (PFS)                                     | Weak       | Weak       | 29  | 57 |
| Jiang T        | NLR-Advanced Cancer (Anti-VEGFR) (OS)                  | Highly     | Strong     | 102 | 58 |
| Su S           | NLR-Urothelial (OS)                                    | Weak       | Weak       | 79  | 59 |
| Yang S         | NLR-Nasopharyngeal (OS)                                | Strong     | Strong     | 11  | 60 |
| Mascarella M   | NLR-Larynx (OS)                                        | Suggestive | Suggestive | 33  | 61 |
| Ni L           | NLR-Endometrial (OS)                                   | Strong     | Strong     | 13  | 62 |
| Tan Q          | NLR-Immunotherapy (Immune checkpoint inhibitors) (PFS) | Highly     | Highly     | 88  | 63 |
| Zhang X        | NLR-Oesophageal (OS)                                   | Highly     | Highly     | 58  | 64 |
| Zhan H         | NLR-Melanoma (OS)                                      | Suggestive | Suggestive | 97  | 65 |
| Xie X          | NLR-NSCLC (Immune Checkpoint Inhibitors) (PFS )        | Weak       | Weak       | 73  | 66 |
| Yin X          | NLR-Prostate CR (OS)                                   | Strong     | Strong     | 1   | 67 |
| Liu X          | NLR-Breast (DFS)                                       | Suggestive | Suggestive | 77  | 68 |

|             |                                                       |            |            |     |     |
|-------------|-------------------------------------------------------|------------|------------|-----|-----|
| Zhang X     | NLR-Oesophageal (Surgery) (OS )                       | Highly     | Highly     | 67  | 69  |
| Yin J       | NLR-Nasopharyngeal (PFS)                              | Strong     | Strong     | 15  | 70  |
| Tham T      | NLR-Head and neck (DFS)                               | Suggestive | Suggestive | 62  | 71  |
| Su L        | NLR-Nasopharyngeal (CSS)                              | Suggestive | Suggestive | 146 | 72  |
| Wang Z      | NLR-NSCLC (ST) (PFS)                                  | Highly     | Highly     | 46  | 73  |
| Zhang X     | NLR-Oesophageal (PFS)                                 | Weak       | Weak       | 45  | 74  |
| Tham T      | NLR-Head and neck (PFS)                               | Weak       | Weak       | 81  | 75  |
| Guan Y      | NLR-Prostate CR (Enzalutamide) (OS)                   | Highly     | Highly     | 53  | 76  |
| Zheng DC    | NLR-Colorectal (PFS)                                  | Suggestive | Suggestive | 98  | 77  |
| Wu J        | NLR-Cervical (PFS)                                    | Suggestive | Suggestive | 109 | 78  |
| Zhang X     | NLR-Oesophageal (CSS)                                 | Weak       | Weak       | 76  | 79  |
| Ethier JL   | NLR-Breast (OS)                                       | Highly     | Strong     | 44  | 80  |
| Min GT      | NLR-Hepatocellular (DFS)                              | Highly     | Highly     | 122 | 81  |
| Chen        | NLR-MPM (OS)                                          | Weak       | Weak       | 106 | 82  |
| Tan Q       | NLR-Immunotherapy (Immune checkpoint inhibitors) (OS) | Highly     | Strong     | 121 | 83  |
| Li H        | NLR-Colorectal (SR) (DFS)                             | Weak       | Weak       | 85  | 84  |
| Xiao WK     | NLR-Hepatocellular (RFA) (DFS)                        | Uncertain  | Uncertain  | 178 | 85  |
| Jiang T     | NLR-NSCLC (PD-1 inhibitor) (PFS)                      | Highly     | Highly     | 3   | 86  |
| Chen J      | NLR-Breast (Metastasis) (OS)                          | Weak       | Weak       | 198 | 87  |
| Xie X       | NLR-Nivolumab (PFS)                                   | Weak       | Weak       | 74  | 88  |
| Liu G       | NLR-STs (OS)                                          | Highly     | Highly     | 60  | 89  |
| Tang H      | NLR-CLM (RFS)                                         | Highly     | Highly     | 93  | 90  |
| Zeng Q      | NLR-Multiple Myeloma (OS)                             | Suggestive | Suggestive | 101 | 91  |
| Wang Y      | NLR-Oral SCC (OS)                                     | Suggestive | Suggestive | 16  | 92  |
| Cho J       | NLR-Head and Neck (SCC) (DFS)                         | Suggestive | Suggestive | 111 | 93  |
| Xiao WK     | NLR-Hepatocellular (MT) (OS)                          | Weak       | Weak       | 161 | 94  |
| Luo Y       | NLR-Renal (CSS)                                       | Uncertain  | Uncertain  | 151 | 95  |
| Gu XB       | NLR-NSCLC (PFS)                                       | Highly     | Highly     | 65  | 96  |
| Pirozzolo G | NLR-Oesophageal (DCRT) (OS )                          | Highly     | Highly     | 89  | 97  |
| Shen M      | IN-Hepatocellular and ICC (OS)                        | Weak       | Weak       | 132 | 98  |
| Zhao QT     | NLR-Lung (both) (PFS)                                 | Weak       | Weak       | 124 | 99  |
| Suh J       | NLR-Urothelial (Radical Cystectomy) (CSS)             | Suggestive | Suggestive | 104 | 100 |
| Suh J       | NLR-Urothelial (Radical Cystectomy) (OS)              | Weak       | Weak       | 112 | 101 |
| Zhou Q      | NLR-Ovarian (PFS)                                     | Suggestive | Suggestive | 95  | 102 |
| Cao D       | NLR-NSCLC (Nivolumab) (PFS)                           | Weak       | Weak       | 119 | 103 |



|              |                                                  |            |            |     |     |
|--------------|--------------------------------------------------|------------|------------|-----|-----|
| Mowbray N    | NLR-Pancreatic (SR) (OS)                         | Highly     | Highly     | 4   | 104 |
| Li H         | NLR-Colorectal (SR) (RFS)                        | Weak       | Weak       | 158 | 105 |
| Mori K       | NLR-UTUC (Nephroureterectomy) (CSS)              | Suggestive | Suggestive | 51  | 106 |
| Guo J        | NLR-Prostate (Metastatic) (OS)                   | Highly     | Highly     | 38  | 107 |
| Yang L       | NLR-Head and Neck (SCC) (PFS)                    | Weak       | Weak       | 135 | 108 |
| Zhang X      | NLR-Gastric (PFS)                                | Weak       | Weak       | 190 | 109 |
| Zhang J      | NLR-Colorectal (DFS)                             | Suggestive | Suggestive | 107 | 110 |
| Li X         | NLR-NAC (OS)                                     | Highly     | Highly     | 86  | 111 |
| Zhou Y       | NLR-Pancreatic (OS)                              | Highly     | Highly     | 82  | 112 |
| Yang Y       | NLR-Oral cavity (OS)                             | Highly     | Highly     | 37  | 113 |
| Yang Y       | NLR-Oral cavity (DFS)                            | Highly     | Highly     | 6   | 114 |
| Luo Y        | NLR-Upper Urinary (RFS)                          | Weak       | Weak       | 188 | 115 |
| Li LQ        | NLR-ST5 (DFS)                                    | Strong     | Strong     | 10  | 116 |
| Yang L       | NLR-Hypopharynx (OS )                            | Weak       | Weak       | 159 | 117 |
| Ni L         | NLR-Endometrial (PFS)                            | Suggestive | Suggestive | 100 | 118 |
| Zhang X      | NLR-Oesophageal (DFS)                            | Weak       | Weak       | 117 | 119 |
| Chen J       | NLR-Breast (Metastasis) (DFS)                    | Highly     | Highly     | 160 | 120 |
| Zhou Q       | NLR-Ovarian (OS)                                 | Suggestive | Suggestive | 110 | 121 |
| Tang H       | NLR-CLM (SR) (RFS)                               | Weak       | Weak       | 140 | 122 |
| Wang Z       | NLR-NSCLC (TT) (PFS )                            | Weak       | Weak       | 130 | 123 |
| Guan Y       | NLR-Prostate CR (Abitaterone) (OS)               | Suggestive | Suggestive | 48  | 124 |
| Suh J        | NLR-Urothelial (Nephroureterectomy) (PFS)        | Suggestive | Suggestive | 99  | 125 |
| Wang Z       | NLR-NSCLC (Chemotherapy) (PFS )                  | Weak       | Weak       | 63  | 126 |
| Pirozzolo G  | NLR-Oesophageal (Surgery+/-Chemo) (OS )          | Highly     | Highly     | 91  | 127 |
| Vartolomei M | NLR-Urothelial (RFS)                             | Weak       | Weak       | 115 | 128 |
| Duan J       | NLR-Breast (SR) (OS)                             | Highly     | Strong     | 126 | 129 |
| Cao D        | NLR-NSCLC (Nivoumab) (OS)                        | Weak       | Weak       | 94  | 130 |
| Xie X        | NLR-Melanoma (Immune checkpoint inhibitors) (OS) | Highly     | Strong     | 139 | 131 |
| Zhang X      | NLR-Oesophageal (RFS)                            | Weak       | Weak       | 169 | 132 |
| Suh J        | NLR-Urothelial (Nephroureterectomy) (OS)         | Suggestive | Suggestive | 154 | 133 |
| Shen M       | SN-Composite endpoints (OS)                      | Uncertain  | Uncertain  | 179 | 134 |
| Cao J        | NLR-Prostate CR (PFS)                            | Suggestive | Suggestive | 96  | 135 |
| Wei Y        | NLR-Urinary (OS)                                 | Suggestive | Suggestive | 72  | 136 |
| Mu S         | NLR-Large B (PFS)                                | Weak       | Weak       | 134 | 137 |
| Luo Y        | NLR-Renal (OS)                                   | Highly     | Highly     | 34  | 138 |

|                   |                                       |            |            |     |     |
|-------------------|---------------------------------------|------------|------------|-----|-----|
| Wang Z            | NLR-NSCLC (ST) (OS)                   | Suggestive | Suggestive | 108 | 139 |
| Yang L            | NLR-Oropharynx (DFS )                 | Weak       | Weak       | 156 | 140 |
| Zhang X           | NLR-Oesophageal (No Surgery) (OS )    | Suggestive | Suggestive | 131 | 141 |
| Vartolomei MD     | NLR-Non muscle Invasive Bladder (RFS) | Suggestive | Suggestive | 194 | 142 |
| Su S              | NLR-Urothelial (DFS)                  | Uncertain  | Uncertain  | 184 | 143 |
| Yu Y              | NLR-Head and Neck (RFS)               | Weak       | Weak       | 152 | 144 |
| Cao J             | NLR-Prostate Localised (RFS)          | Weak       | Weak       | 142 | 145 |
| Zhou Y            | NLR-Pancreatic (DFS)                  | Weak       | Weak       | 129 | 146 |
| Wang Z            | NLR-NSCLC (Chemotherapy) (OS )        | Suggestive | Suggestive | 128 | 147 |
| Tham T            | NLR-Head and Neck (SR) (OS)           | Weak       | Weak       | 172 | 148 |
| Guan Y            | NLR-Prostate CR (Enzalutamide) (PFS)  | Uncertain  | Uncertain  | 189 | 149 |
| Boissier R        | NLR-Renal Localised (RFS)             | Weak       | Weak       | 137 | 150 |
| Boissier R        | NLR-Renal Localised (OS)              | Uncertain  | Uncertain  | 187 | 151 |
| Yang JJ           | NLR-Pancreatic (CSS)                  | Weak       | Weak       | 173 | 152 |
| Boissier R        | NLR-Renal Advanced (OS)               | Highly     | Highly     | 105 | 153 |
| Shen M            | IN-Head and Neck (OS)                 | Weak       | Weak       | 168 | 154 |
| Mu S              | NLR-Large B (OS)                      | Weak       | Weak       | 144 | 155 |
| Chen J            | NLR-Breast (No Metastasis) (DFS)      | Uncertain  | Uncertain  | 177 | 156 |
| Zhou Y            | NLR-GNT (OS)                          | Weak       | Weak       | 118 | 157 |
| Guo J             | NLR-Prostate (PFS)                    | Highly     | Highly     | 66  | 158 |
| Xu ZG             | NLR-Hepatocellular (Transplant) (OS)  | Suggestive | Suggestive | 147 | 159 |
| Xie X             | NLR-Ipilimumab (PFS)                  | Weak       | Weak       | 174 | 160 |
| Szor D            | NLR-Gastric (SR) (OS)                 | Highly     | Strong     | 149 | 161 |
| Liu X             | NLR-Breast (Triple-negative) (OS)     | Weak       | Weak       | 123 | 162 |
| Yin X             | NLR-Prostate Localised (OS)           | Uncertain  | Uncertain  | 185 | 163 |
| Xie X             | NLR-Ipilimumab (OS)                   | Weak       | Weak       | 153 | 164 |
| Li X              | NLR-NAC (RFS)                         | Weak       | Weak       | 92  | 165 |
| Semeniuk-Wojtas A | NLR-Renal (TKI) (OS)                  | Highly     | Strong     | 71  | 166 |
| Shen M            | IN-Composite endpoints (CSS)          | Weak       | Weak       | 201 | 167 |
| Zhou Y            | NLR-GNT (RFS)                         | Weak       | Weak       | 170 | 168 |
| Suh J             | NLR-Bladder (UTR) (PFS)               | Suggestive | Suggestive | 127 | 169 |
| Luo Y             | NLR-Renal (RFS)                       | Weak       | Weak       | 166 | 170 |
| Wang Z            | NLR-NSCLC (TT) (OS )                  | Weak       | Weak       | 145 | 171 |
| Na N              | NLR-Renal (PFS)                       | Suggestive | Suggestive | 125 | 172 |
| Zeng Q            | NLR-Multiple Myeloma (PFS)            | Weak       | Weak       | 162 | 173 |

|                   |                                                   |            |            |     |     |
|-------------------|---------------------------------------------------|------------|------------|-----|-----|
| Semeniuk-Wojtas A | NLR-Renal (TKI) (PFS)                             | Weak       | Weak       | 141 | 174 |
| Li LQ             | NLR-ST5 (Synovial Sarcoma) (OS)                   | Weak       | Weak       | 150 | 175 |
| Tang H            | NLR-CLM (Non-surgical) (OS)                       | Suggestive | Suggestive | 200 | 176 |
| Jiang T           | NLR-NSCLC (PD-1 inhibitor) (OS)                   | Highly     | Strong     | 43  | 177 |
| Vartolomei MD     | NLR-Non muscle Invasive Bladder (PFS)             | Strong     | Strong     | 78  | 178 |
| Guan Y            | NLR-Prostate CR (Abitaterone) (PFS)               | Uncertain  | Uncertain  | 191 | 179 |
| Liu X             | NLR-Breast (Triple-negative) (DFS)                | Weak       | Weak       | 138 | 180 |
| Li X              | NLR-NAC (CSS)                                     | Weak       | Weak       | 148 | 181 |
| Xu ZG             | NLR-Hepatocellular (Transplant) (RFS)             | Weak       | Weak       | 165 | 182 |
| Wang Z            | NLR-NSCLC (Immunotherapy) (OS )                   | Suggestive | Suggestive | 133 | 183 |
| Feng J            | NLR-Thyroid (DFS)                                 | Uncertain  | Uncertain  | 157 | 184 |
| Liu X             | NLR-Breast (CSS)                                  | Weak       | Weak       | 167 | 185 |
| Tang H            | NLR-CLM (Non-surgical) (RFS)                      | Weak       | Weak       | 195 | 186 |
| Shen M            | IN-Renal (OS)                                     | Weak       | Weak       | 196 | 187 |
| Xie X             | NLR-Nivolumab (OS)                                | Weak       | Weak       | 120 | 188 |
| Vartolomei MD     | NLR-Non muscle Invasive Bladder (High Risk) (RFS) | Weak       | Weak       | 164 | 189 |
| Boissier R        | NLR-Renal Advanced (PFS)                          | Weak       | Weak       | 163 | 190 |
| Duan J            | NLR-Breast (SR) (RFS)                             | Weak       | Weak       | 202 | 191 |
| Vartolomei MD     | NLR-Non muscle Invasive Bladder (High Risk) (PFS) | Weak       | Weak       | 171 | 192 |
| Li LQ             | NLR-ST5 (Liposarcoma) (OS)                        | Weak       | Weak       | 199 | 193 |
| Mellor K          | NLR-Gastric (SR) (DFS)                            | Weak       | Weak       | 197 | 194 |
| Shen M            | IN-Gastric (OS)                                   | Uncertain  | Uncertain  | 181 | 195 |
| Shen M            | PN-Composite endpoints (OS)                       | Uncertain  | Uncertain  | 192 | 196 |
| Luo XF            | NLR-Gastrointestinal Stromal (OS)                 | Uncertain  | Uncertain  | 193 | 197 |
| Dong YW           | NLR-Rectal (RFS)                                  | Weak       | Weak       | 176 | 198 |
| Zhou Y            | NLR-Pancreatic Neuroendocrine Tumour (OS)         | Weak       | Weak       | 203 | 199 |
| Dong YW           | NLR-Rectal (DFS)                                  | Weak       | Weak       | 175 | 200 |
| Wang Y            | NLR-Oral SCC (DFS)                                | Weak       | Weak       | 27  | 201 |
| Zhou Y            | NLR-Pancreatic Neuroendocrine Tumour (RFS)        | Weak       | Weak       | 204 | 202 |
| Chen J            | NLR-Breast (No Metastasis) (OS)                   | Uncertain  | Uncertain  | 186 | 203 |
| Dong YW           | NLR-Rectal (OS)                                   | Suggestive | Suggestive | 155 | 204 |

## Appendix M: AMSTAR 2 quality rating of meta-analysis with highly suggestive or strong evidence

| Author            | Year | Indicators | Cancer sites                                        | meta-analysis metrics | Level of Evidence | AMSTAR 2 Quality Rating |
|-------------------|------|------------|-----------------------------------------------------|-----------------------|-------------------|-------------------------|
| Ni L              | 2020 | NLR        | Endometrial carcinoma                               | OS                    | Strong            | High                    |
| Suh J             | 2019 | NLR        | Urothelial transurethral resection of bladder tumor | RFS                   | Strong            | High                    |
|                   |      |            | Urothelial Carcinoma with Chemo                     | OS                    | Highly            |                         |
| Vartolomei MD     | 2018 | NLR        | Non muscle Invasive Bladder                         | PFS                   | Strong            | Moderate                |
| Yin J             | 2017 | NLR        | Nasopharyngeal                                      | PFS                   | Strong            | Moderate                |
| Yin X             | 2016 | NLR        | Prostate CR                                         | OS                    | Strong            | Low                     |
| Li LQ             | 2020 | NLR        | Soft tissue sarcoma                                 | DFS                   | Strong            | Critically Low          |
| Yang S            | 2019 | NLR        | Nasopharyngeal                                      | OS                    | Strong            | Critically Low          |
| Duan J            | 2018 | NLR        | Breast Surgical Resection                           | OS                    | Strong (upgraded) | High                    |
| Jiang T           | 2018 | NLR        | Advanced Cancer with Anti-VEGFR                     | OS                    | Strong (upgraded) | Moderate                |
| Tang H            | 2016 | NLR        | CLM                                                 | OS                    | Strong (upgraded) | Moderate                |
|                   |      |            | CLM SR                                              | OS                    | Strong (upgraded) |                         |
| Szor D            | 2018 | NLR        | CLM SR                                              | OS                    | Strong (upgraded) | Moderate                |
| Ethier JL         | 2017 | NLR        | Breast                                              | OS                    | Strong (upgraded) | Moderate                |
| Tan Q             | 2018 | NLR        | Immune checkpoint inhibitors                        | OS                    | Strong (upgraded) | Low                     |
| Paramanathan A    | 2014 | NLR        | Composite endpoints*                                | DFS                   | Strong (upgraded) | Low                     |
| Semeniuk-Wojtas A | 2018 | NLR        | Renal (TKI)                                         | OS                    | Strong (upgraded) | Critically Low          |
| Xie X             | 2019 | NLR        | Melanoma with Immune checkpoint inhibitors          | OS                    | Strong (upgraded) | Critically Low          |
| Jiang T           | 2019 | NLR        | NSCLC treated with PD-1 inhibitor                   | OS                    | Strong (upgraded) | High                    |
|                   |      |            |                                                     | PFS                   | Highly            |                         |
| Zhou Y            | 2018 | NLR        | Pancreatic                                          | OS                    | Highly            | High                    |
| Liu L             | 2019 | NLR        | Hepatocellular carcinoma treated with Sorfenib      | OS                    | Highly            | High                    |
| Zhang X           | 2018 | NLR        | Oesophageal                                         | OS                    | Highly            | High                    |
|                   |      |            | Oesophageal Surgery                                 | OS                    | Highly            |                         |
|                   |      |            | Oesophageal Squamous cell carcinoma                 | OS                    | Highly            |                         |

|             |      |     |                                            |     |        |          |
|-------------|------|-----|--------------------------------------------|-----|--------|----------|
| Wang Y      | 2018 | NLR | Hepatocellular Resection                   | OS  | Highly | High     |
|             |      |     |                                            | DFS | Highly |          |
| Mei Z       | 2017 | NLR | Composite endpoints*                       | PFS | Highly | Moderate |
| Jiang T     | 2018 | NLR | Advanced Cancer with immunotherapy         | OS  | Highly | Moderate |
|             |      |     |                                            | PFS | Highly |          |
| Zheng DC    | 2016 | NLR | Colorectal                                 | OS  | Highly | Moderate |
| Mowbray N   | 2018 | NLR | Pancreatic SR                              | OS  | Highly | Moderate |
| Wang Y      | 2018 | NLR | Hepatocellular SR                          | RFS | Highly | Moderate |
| Tang H      | 2017 | NLR | Biliary Tract                              | OS  | Highly | Moderate |
| Luo Y       | 2015 | NLR | Renal                                      | OS  | Highly | Moderate |
| Wu S        | 2018 | NLR | Bladder                                    | RFS | Highly | Moderate |
| Min GT      | 2018 | NLR | Hepatocellular                             | OS  | Highly |          |
|             |      |     |                                            | DFS | Highly | Moderate |
|             |      |     |                                            | RFS | Highly |          |
| Gu XB       | 2015 | NLR | NSCLC                                      | PFS | Highly | Moderate |
| Tang H      | 2016 | NLR | CLM                                        | RFS | Highly | Moderate |
| Guo W       | 2019 | NLR | Breast (triple negative and Her2 positive) | DFS | Highly | Moderate |
| Pirozzolo G | 2019 | NLR | Oesophageal DCRT                           | OS  | Highly | Moderate |
|             |      |     | Oesophageal Surgery+/-chemo                | OS  | Highly |          |
| Tham T      | 2018 | NLR | Head and Neck                              | OS  | Highly | Moderate |
| Wang Z      | 2019 | NLR | NSCLC with systematic therapy              | PFS | Highly | Low      |
| Tan Q       | 2018 | NLR | Immune checkpoint inhibitors               | PFS | Highly | Low      |
| Li X        | 2018 | NLR | Neoadjuvant Chemotherapy                   | OS  | Highly | Low      |
| Sun J       | 2016 | NLR | Gastric                                    | OS  | Highly | Low      |
| Liu X       | 2017 | NLR | Breast                                     | DFS | Highly | Low      |
| Zhao QT     | 2015 | NLR | Lung (both)                                | OS  | Highly | Low      |
| Guo J       | 2018 | NLR | Prostate                                   | PFS | Highly | Low      |
|             |      |     | Prostate metastatic                        | OS  | Highly |          |

|            |      |     |                                                   |     |        |                |
|------------|------|-----|---------------------------------------------------|-----|--------|----------------|
| Guan Y     | 2020 | NLR | Prostate (castration resistant) with enzalutamide | OS  | Highly | Low            |
| Boissier R | 2017 | NLR | Renal Advanced                                    | OS  | Highly | Critically Low |
| Ethier JL  | 2017 | NLR | Gynaecologic                                      | OS  | Highly | Critically Low |
| Liu G      | 2018 | NLR | Soft Tissue Sarcoma                               | OS  | Highly | Critically Low |
| Li S       | 2020 | NLR | Hepatocellular (TACE)                             | OS  | Highly | Critically Low |
| Yang Y     | 2018 | NLR | Oral cavity                                       | OS  | Highly | Critically Low |
|            |      |     |                                                   | DFS | Highly |                |

N=number of component studies with in review, (NA) Not Applicable, (HR), Hazard ratio, (NLR) Neutrophil to Lymphocyte Ratio, (IN) Intratumoural Neutrophils, (PN) Peritumoural Neutrophils, (SN) Stromal Neutrophils, (OS) Overall Survival, (DFS) Disease-Free Survival, (PFS) Progression-Free Survival, (RFS) Reoccurrence-Free Survival, (CSS) Cancer Specific Survival, (VEGFR) Vascular Endothelial Growth Factor Receptor, (PC) Palliative Chemotherapy, (SBR) Surgical Bowel Resection, (SR) Surgical Resection, (UUB) Upper Urinary and Bladder, (CLM) Colorectal Liver Metastasis, (NS) Non-surgical, (HCC) Hepatocellular Carcinoma, (ICC) Intrahepatic Cholangiocarcinoma, (RFA) Radiofrequency Ablation, (TACE) Trans-Arterial Chemoembolization, (MPM) Malignant Pleural Mesothelioma, (NSCLC) Non-Small Cell Lung Cancer, (NHC), Neck and Head Cancer, (CR) Castration Resistant, (TKI) Tyrosine Kinase Inhibitor. \*Composite endpoints are defined as a grouping of cancer diagnosis unrelated to site, stage or treatment unless otherwise specified. †review reported incomplete data on sample size.

## Appendix N: Assessment of quality of component studies

Appendix N, Table 1 – Quality Assessment Tools used by Reviews

| Review       |      | Tools and Guidance Used by Review                  |                                 |
|--------------|------|----------------------------------------------------|---------------------------------|
| Author       | Year | Quality Assessment Tool Used for Component Studies | Systematic Review Guidance Used |
| Shen M       | 2014 | None                                               | PRISMA                          |
| Mei Z        | 2017 | QUIPS                                              | PRISMA                          |
| Dolan R      | 2017 | None                                               | PRISMA                          |
| Paramanathan | 2014 | QUIPS                                              | Not stated                      |
| Jiang T      | 2018 | QUIPS                                              | PRISMA                          |
| Tan Q        | 2018 | NOS                                                | PRISMA                          |
| Sacdalan DB  | 2018 | Cochrane                                           | Not stated                      |
| Li X         | 2018 | NOS                                                | PRISMA                          |
| Sun J        | 2016 | NOS                                                | PRISMA                          |
| Szor DJ      | 2018 | NOS                                                | PRISMA                          |
| Luo ZF       | 2018 | NOS                                                | Not stated                      |
| Zhang X      | 2014 | NOS                                                | PRISMA                          |
| Mellor KL    | 2018 | NOS                                                | PRISMA                          |
| Huang Y      | 2017 | NOS                                                | Not stated                      |
| Zheng DC     | 2016 | NOS                                                | MOOSE                           |
| Malietzis G  | 2014 | SIGN                                               | PRISMA                          |
| Zhang J      | 2017 | NOS                                                | Not stated                      |
| Dong Y       | 2016 | NOS                                                | Not stated                      |
| Tang H       | 2016 | NOS                                                | MOOSE                           |
| Zhou Y       | 2018 | NOS                                                | PRISMA                          |
| Mowbray N    | 2018 | QUIPS                                              | PRISMA                          |
| Yang J       | 2015 | NOS                                                | Not stated                      |
| Ethier J     | 2017 | None                                               | PRISMA                          |
| Wu J         | 2017 | NOS                                                | PRISMA                          |
| Zhou Q       | 2017 | NOS                                                | PRISMA                          |
| Ethier J     | 2017 | QUIPS                                              | PRISMA                          |
| Chen J       | 2018 | None                                               | PRISMA                          |
| Liu X        | 2017 | None                                               | PRISMA                          |
| Min GT       | 2018 | NOS                                                | PRISMA                          |
| Xu ZG        | 2018 | NOS                                                | PRISMA                          |
| Xiao WK      | 2014 | NOS                                                | Not stated                      |
| Xu W         | 2018 | NOS                                                | PRISMA                          |
| Sun XD       | 2016 | NOS                                                | Not stated                      |
| Wang Y       | 2018 | NOS                                                | PRISMA                          |
| Tang H       | 2017 | NOS                                                | MOOSE                           |
| Mu S         | 2018 | NOS                                                | REMARK                          |
| Zhang J      | 2017 | None                                               | PRISMA                          |
| Zhou Y       | 2018 | NOS                                                | Not stated                      |
| Gu XB        | 2015 | NOS                                                | Not stated                      |
| Zhoa QT      | 2015 | NOS                                                | Not stated                      |
| Yu Y         | 2018 | NOS                                                | PRISMA                          |
| Yu Y         | 2017 | None                                               | Not stated                      |
| Mascarella M | 2018 | None                                               | PRISMA                          |
| Takenaka Y   | 2017 | NOS                                                | PRISMA                          |
| Yin J        | 2017 | NOS                                                | PRISMA                          |
| Su L         | 2017 | NOS                                                | PRISMA                          |
| Wang Y       | 2018 | NOS                                                | PRISMA                          |
| Chen N       | 2017 | NOS                                                | Not stated                      |
| Zhan H       | 2018 | NOS                                                | Not stated                      |

|                   |      |            |                 |
|-------------------|------|------------|-----------------|
| Ding Y            | 2018 | NOS        | PRISMA          |
| Luo Y             | 2015 | NOS        | MOOSE           |
| Boissier R        | 2017 | None       | PRISMA          |
| Semeniuk-Wojtas A | 2018 | GRADE      | Not stated      |
| Na N              | 2016 | NOS        | Not stated      |
| Lucca I           | 2015 | NOS        | PRISMA          |
| Vartolomei M      | 2018 | NOS        | PRISMA          |
| Wei Y             | 2014 | MOOSE      | PRISMA          |
| Li X              | 2017 | NOS        | MOOSE           |
| Wu S              | 2018 | NOS        | Not stated      |
| Cao J             | 2016 | None       | PRISMA          |
| Yin X             | 2016 | MOOSE      | PRISMA          |
| Vartolomei M      | 2018 | NOS        | PRISMA          |
| Zhou Q            | 2017 | NOS        | PRISMA          |
| Zhang X           | 2018 | NOS        | PRISMA          |
| Zeng Q            | 2018 | NOS        | PRISMA          |
| Yang Y            | 2018 | NOS        | PRISMA          |
| Yang S            | 2019 | NOS        | PRISMA          |
| Yang L            | 2019 | NOS        | Not stated      |
| Xie X             | 2019 | Not stated | Not stated      |
| Wang Z            | 2019 | NOS        | Not stated      |
| Wang Y            | 2018 | NOS        | PRISMA          |
| Tham T            | 2018 | QUIPS      | PRISMA          |
| Suh J             | 2019 | NOS        | PRISMA          |
| Su S              | 2019 | NOS        | PRISMA & AMSTAR |
| Pirozzolo G       | 2019 | NOS        | PRISMA          |
| Ni L              | 2020 | NOS        | PRISMA          |
| Mori K            | 2020 | NOS        | PRISMA          |
| Mori K            | 2020 | NOS        | PRISMA          |
| Lu Y              | 2020 | NOS        | PRISMA          |
| Liu L             | 2019 | NOS        | PRISMA          |
| Liu G             | 2018 | NOS        | Not stated      |
| Li S              | 2020 | NOS        | PRISMA          |
| Li LQ             | 2020 | NOS        | Not stated      |
| Li H              | 2019 | NOS        | PRISMA          |
| Lei Y             | 2019 | NOS        | PRISMA          |
| Jiang T           | 2019 | NOS        | PRISMA          |
| Hu G              | 2019 | NOS        | Not stated      |
| Guo W             | 2019 | QUIPS      | Not stated      |
| Guo J             | 2018 | NOS        | PRISMA & AMSTAR |
| Guan Y            | 2020 | NOS        | PRISMA          |
| Feng J            | 2020 | NOS        | PRISMA          |
| Duan J            | 2018 | SIGN       | PRISMA          |
| Cho J             | 2018 | NOS        | PRISMA          |
| Cao D             | 2018 | NOS        | Not stated      |

(QUIPS) Quality in Prognostic Studies, (NOS) Newcastle-Ottawa Scale, (SIGN) Scottish International Guideline Network, (MOOSE) Meta-analyses Of Observational Studies in Epidemiology, (PRISMA) Preferred Reporting Items for Systematic Reviews and Meta-analyses, (REMARK) Reporting Recommendations for Tumor Marker Prognostic Studies.



Appendix N, Table 2 – QUIPS Risk of Bias Assessment Instrument for Prognostic Factor Studies (Reviews with Strong Evidence)

| Review        |      |           |                               |                      | Component Study |      | Risk Across QUIPS Domains |                 |                               |                     |                   |                                    |
|---------------|------|-----------|-------------------------------|----------------------|-----------------|------|---------------------------|-----------------|-------------------------------|---------------------|-------------------|------------------------------------|
| Author        | Year | Biomarker | Cancer Site                   | Meta-analysis Metric | Author          | Year | Study Participation       | Study Attrition | Prognostic Factor Measurement | Outcome Measurement | Study Confounding | Statistical Analysis and Reporting |
| Vartolomei MD | 2018 | NLR       | Non-muscle Invasive Bladder   | PFS                  | Mano*           | 2015 | Low                       | Moderate        | Low                           | Low                 | Low               | Low                                |
|               |      |           |                               |                      | Favilla*        | 2016 | Low                       | Low             | Low                           | Low                 | Low               | Low                                |
|               |      |           |                               |                      | Mbeutcha        | 2016 | Low                       | Low             | Low                           | Low                 | Low               | Low                                |
|               |      |           |                               |                      | Ogihara*        | 2016 | Low                       | Moderate        | Low                           | Low                 | Low               | Low                                |
|               |      |           |                               |                      | Mao             | 2017 | Low                       | Moderate        | Low                           | Low                 | Low               | Low                                |
|               |      |           |                               |                      | Ramos           | 2017 | Moderate                  | Moderate        | Low                           | Moderate            | Low               | Low                                |
| Yin J         | 2017 | NLR       | Nasopharyngeal                | PFS                  | Sun*            | 2016 | Low                       | Moderate        | Low                           | Low                 | Low               | Low                                |
|               |      |           |                               |                      | Chen*           | 2014 | Low                       | Moderate        | Low                           | Low                 | Low               | Low                                |
|               |      |           |                               |                      | Jin             | 2015 | Low                       | Low             | Moderate                      | Low                 | Low               | Low                                |
|               |      |           |                               |                      | He*             | 2012 | Low                       | Moderate        | Moderate                      | Low                 | Low               | Low                                |
|               |      |           |                               |                      | An*             | 2011 | Low                       | High            | Low                           | Low                 | Low               | Low                                |
|               |      |           |                               |                      | Chang*          | 2013 | Moderate                  | Moderate        | Low                           | Low                 | Low               | Low                                |
| Yin X         | 2016 | NLR       | Prostate Castration Resistant | OS                   | Yao             | 2015 | Low                       | Moderate        | Low                           | Low                 | Low               | Low                                |
|               |      |           |                               |                      | Nakagami        | 2015 | High                      | High            | Low                           | Moderate            | Moderate          | Moderate                           |
|               |      |           |                               |                      | MacLanchlan     | 2015 | Low                       | Moderate        | Low                           | Low                 | Low               | Moderate                           |
|               |      |           |                               |                      | Lorente         | 2015 | High                      | Moderate        | Low                           | Low                 | Moderate          | Moderate                           |
|               |      |           |                               |                      | Templeton*      | 2014 | Low                       | Low             | Low                           | Low                 | Low               | Low                                |
|               |      |           |                               |                      | Templeton*      | 2014 | Low                       | Low             | Low                           | Low                 | Low               | Low                                |
|               |      |           |                               |                      | Sonpavde        | 2014 | Low                       | Moderate        | Low                           | Low                 | Low               | Low                                |
|               |      |           |                               |                      | Nuhn            | 2014 | Low                       | Low             | Low                           | Low                 | Low               | Low                                |
|               |      |           |                               |                      | Linton          | 2013 | Low                       | Low             | Low                           | Low                 | Low               | Low                                |
| Suh J         | 2019 | NLR       | Bladder (UTR)                 | RFS                  | Ozyalvacli      | 2015 | Low                       | High            | Low                           | Moderate            | High              | Moderate                           |
|               |      |           |                               |                      | Mano*           | 2015 | Low                       | Moderate        | Low                           | Low                 | Low               | Low                                |
|               |      |           |                               |                      | Favilla*        | 2016 | Low                       | Low             | Low                           | Low                 | Low               | Low                                |
|               |      |           |                               |                      | Ogihara*        | 2016 | Low                       | Moderate        | Low                           | Low                 | Low               | Low                                |
|               |      |           |                               |                      | Camtosun        | 2017 | Moderate                  | High            | Low                           | Low                 | Low               | Low                                |
| Ni L          | 2020 | NLR       | Endometrial                   | OS                   | Aoyama          | 2019 | Low                       | Moderate        | Low                           | Low                 | Low               | Low                                |
|               |      |           |                               |                      | Comert          | 2018 | Low                       | Low             | Low                           | Low                 | Moderate          | Low                                |
|               |      |           |                               |                      | Cummings        | 2015 | Low                       | Moderate        | Low                           | Low                 | Low               | Low                                |
|               |      |           |                               |                      | Ding            | 2017 | Low                       | Low             | Low                           | Low                 | Low               | Moderate                           |
|               |      |           |                               |                      | Eo              | 2016 | Low                       | Low             | Low                           | Low                 | Low               | Low                                |

|        |      |     |                |     |            |      |          |          |          |          |          |     |
|--------|------|-----|----------------|-----|------------|------|----------|----------|----------|----------|----------|-----|
|        |      |     |                |     | Haruma     | 2015 | Low      | Moderate | Low      | Low      | Low      | Low |
|        |      |     |                |     | Li         | 2015 | Low      | Moderate | Low      | Low      | Low      | Low |
|        |      |     |                |     | Matsuo     | 2015 | Low      | Low      | Low      | Moderate | Low      | Low |
|        |      |     |                |     | Takahashi  | 2015 | Low      | Low      | Moderate | Low      | Low      | Low |
|        |      |     |                |     | Jin        | 2015 | Low      | Low      | Low      | Low      | Moderate | Low |
|        |      |     |                |     | An*        | 2011 | Low      | High     | Low      | Low      | Low      | Low |
|        |      |     |                |     | Li         | 2017 | Low      | Low      | Low      | Low      | Moderate | Low |
|        |      |     |                |     | Sun*       | 2016 | Low      | Moderate | Low      | Low      | Low      | Low |
| Yang S | 2019 | NLR | Nasopharyngeal | OS  | Chua       | 2016 | Moderate | Low      | Low      | Low      | Low      | Low |
|        |      |     |                |     | He*        | 2012 | Low      | Moderate | Moderate | Low      | Low      | Low |
|        |      |     |                |     | Li         | 2016 | Moderate | Moderate | Low      | Low      | Low      | Low |
|        |      |     |                |     | Chang*     | 2013 | Moderate | Moderate | Low      | Low      | Low      | Low |
|        |      |     |                |     | Chen*      | 2014 | Low      | Moderate | Low      | Low      | Low      | Low |
|        |      |     |                |     | Lu         | 2017 | Moderate | Low      | Low      | Low      | Low      | Low |
|        |      |     |                |     | Chan       | 2018 | Low      | Low      | Low      | Low      | Low      | Low |
|        |      |     |                |     | Chen       | 2019 | Low      | Low      | Moderate | Low      | Low      | Low |
|        |      |     |                |     | Cheng      | 2019 | Low      | Low      | Low      | Low      | Low      | Low |
| Li LQ  | 2020 | NLR | STS            | DFS | Idowu      | 2012 | High     | Low      | Low      | Moderate | Low      | Low |
|        |      |     |                |     | Jiang      | 2015 | Moderate | Low      | Low      | Low      | Low      | Low |
|        |      |     |                |     | Szkandera* | 2014 | Low      | Moderate | Low      | Low      | Low      | Low |
|        |      |     |                |     | Szkandera* | 2014 | Low      | Moderate | Low      | Low      | Low      | Low |

*Modified from:* Hayden JA, Côté P, Bombardier C. Evaluation of the Quality of Prognosis Studies in Systematic Reviews. *Annals of Internal Medicine*. 2006;144:427-437, with the assistance of the QUIPS-LBP Working Group.

#### Ratings:

High bias: The relationship between the PF and outcome is very likely to be different for participants and eligible nonparticipants

Moderate bias: The relationship between the PF and outcome may be different for participants and eligible nonparticipants

Low bias: The relationship between the PF and outcome is unlikely to be different for participants and eligible nonparticipants

## Appendix O: Sensitivity analyses of overall survival in rectal cancer

Appendix O Figure 1 - NLR: Overall survival in rectal cancer

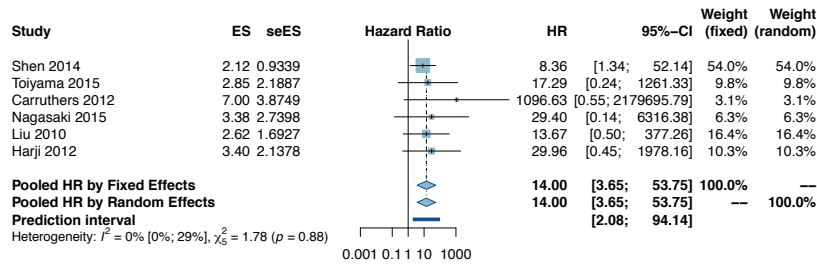

Association between elevated NLR and OS in rectal cancer, as reported by Dong et al. 2016. Weightings and summary effect estimates are pictured for both fixed and random effects. (ES) Effect Size, (seES) Standard error of Effect Size, (HR) Hazard ratio.

Appendix O Figure 2 - NLR: Overall survival in rectal cancer with Carruthers et al. 2012 removed

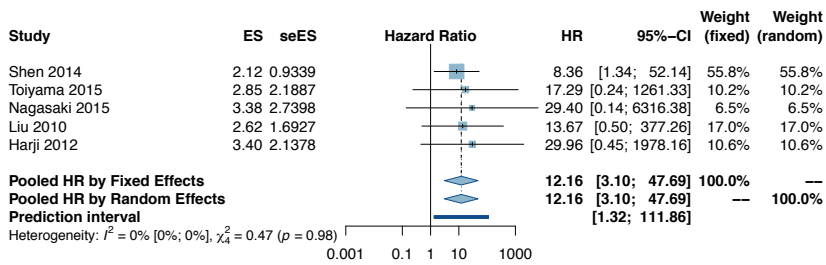

Association between elevated NLR and OS in rectal cancer, with point estimate from Carruthers et al. 2012 removed. Weightings and summary effect estimates are pictured for both fixed and random effects. (ES) Effect Size, (seES) Standard error of Effect Size, (HR) Hazard ratio.

The association between elevated NLR and OS in rectal cancer (Dong et al 2016) represented an outlier among all included meta-analyses, with an HR of 14.00 [95% CI 3.65-53.75] through the random effects model. Within this meta-analysis, the point estimate by Carruthers et al. 2012 reported an HR of 1096.63 [95% CI 0.55-2179695.79]. This point estimate was removed for sensitivity analysis and resulted in a new HR of 12.16 [95% CI 3.10-47.69] through the random effects model. This 13% difference in HR suggests that the effect size estimate reported by Dong et al. 2014 is not overly sensitive to the largest reported effect size of its included studies.
