# Supplementary material for: Neutrophil to lymphocyte ratio and cancer prognosis: an umbrella review of systematic reviews and meta-analyses of observational studies
Source: PubMed Central journal article supplement (PMC7678319; doi:10.1186/s12916-020-01817-1), 2020-11-20
Supplement: 12916_2020_1817_MOESM2_ESM.pdf [file 12916_2020_1817_MOESM2_ESM.pdf]

## Supplementary Figures 1 - 205

### Supplementary Figure 1 - Grading criteria for evidence

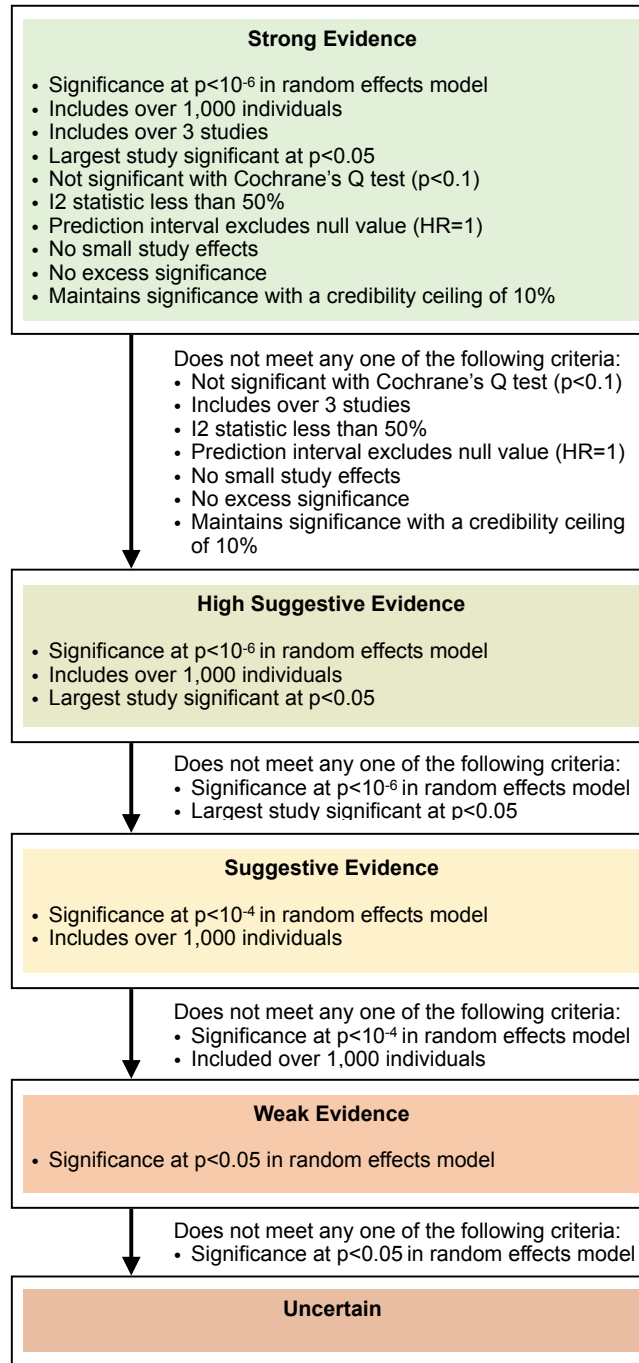

**Supplementary Figure 1.** Grading criteria for evidence. Associations were categorised according to pre-defined Grading of Recommendations, Assessment, Development and Evaluations (GRADE) based on previously published umbrella review studies (Kyrgiou et al., 2017; Theodoratou et al., 2014; Tsilidis et al., 2015). We additionally required studies to have 3 or more component studies due to the prevalence of associations with very small sample sizes and a new category “not significant” for those associations which were not backed by a significant effect estimate and could not be classified as “weak”.

## Supplementary Figure 2 - NLR: OS in Composite endpoints

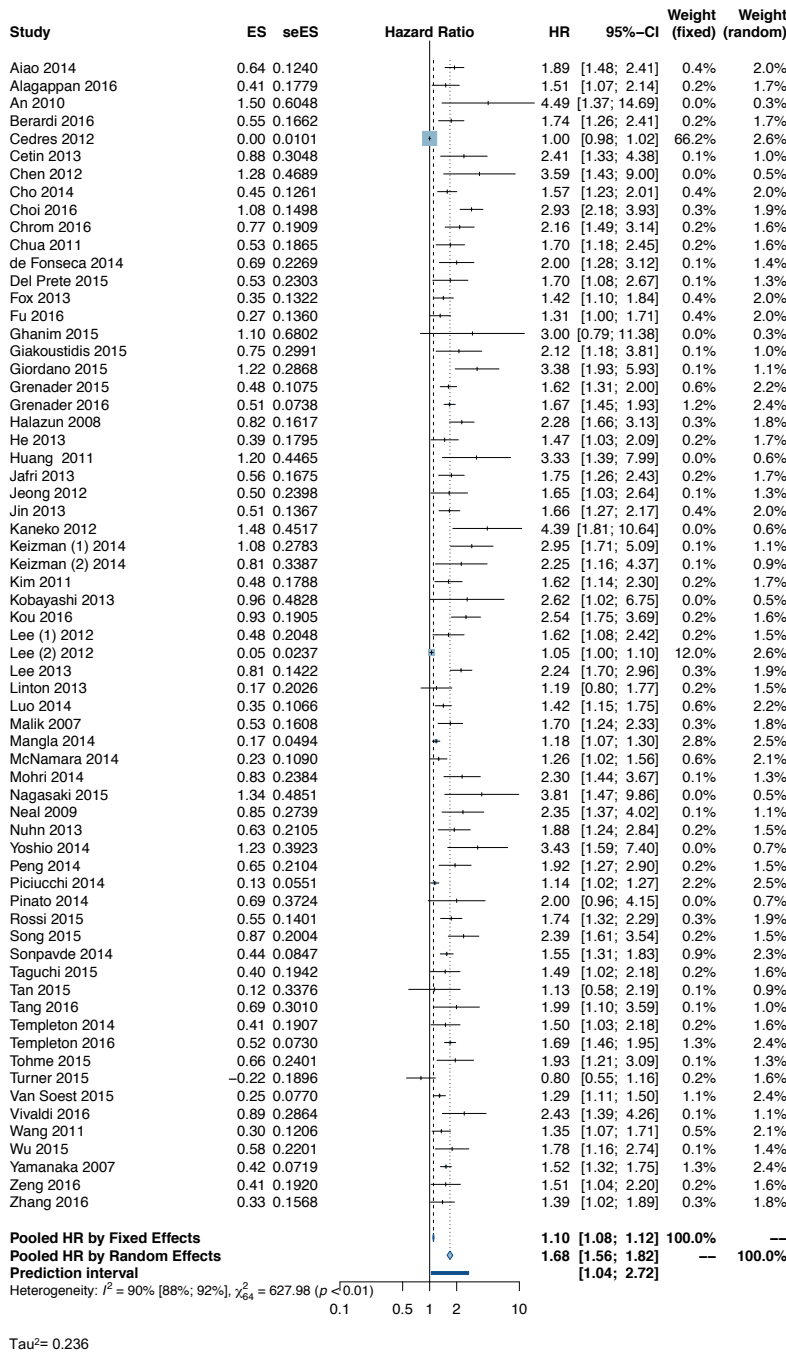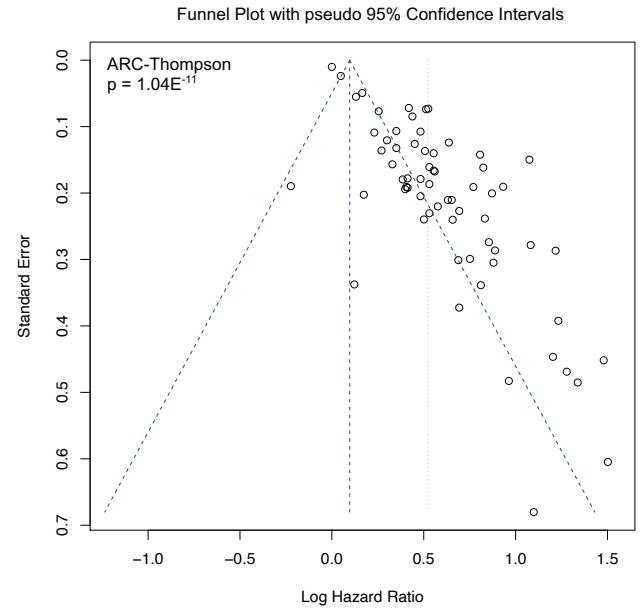

All funnel plots within Appendix 5 display the standard error of the individual studies on the Y-axis labelled "Standard Error" and the log(HR) from the random effects estimate on the X-axis labelled "Log Hazard Ratio". The pseudo 95% CI are centred around the fixed effects summary effect estimate.

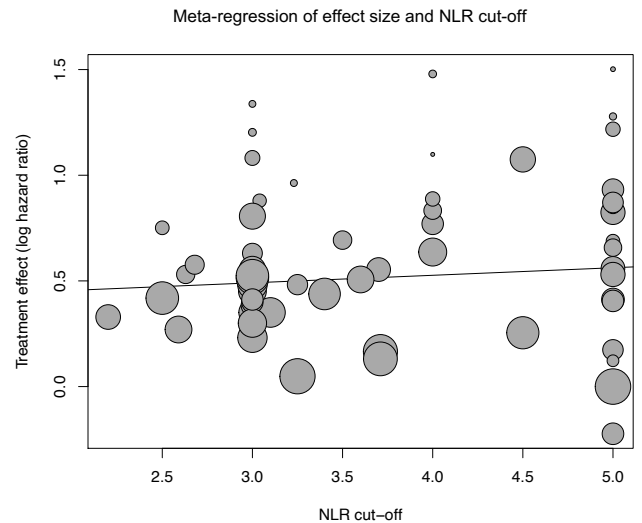

All forest plots display both the weightings and summary effect size estimates for both fixed and random effects models. (ES) Effect Size, (seES) Standard error of Effect Size.

**Supplementary Figure 3 - NLR: DFSin Composite endpoints (solid tumours)**

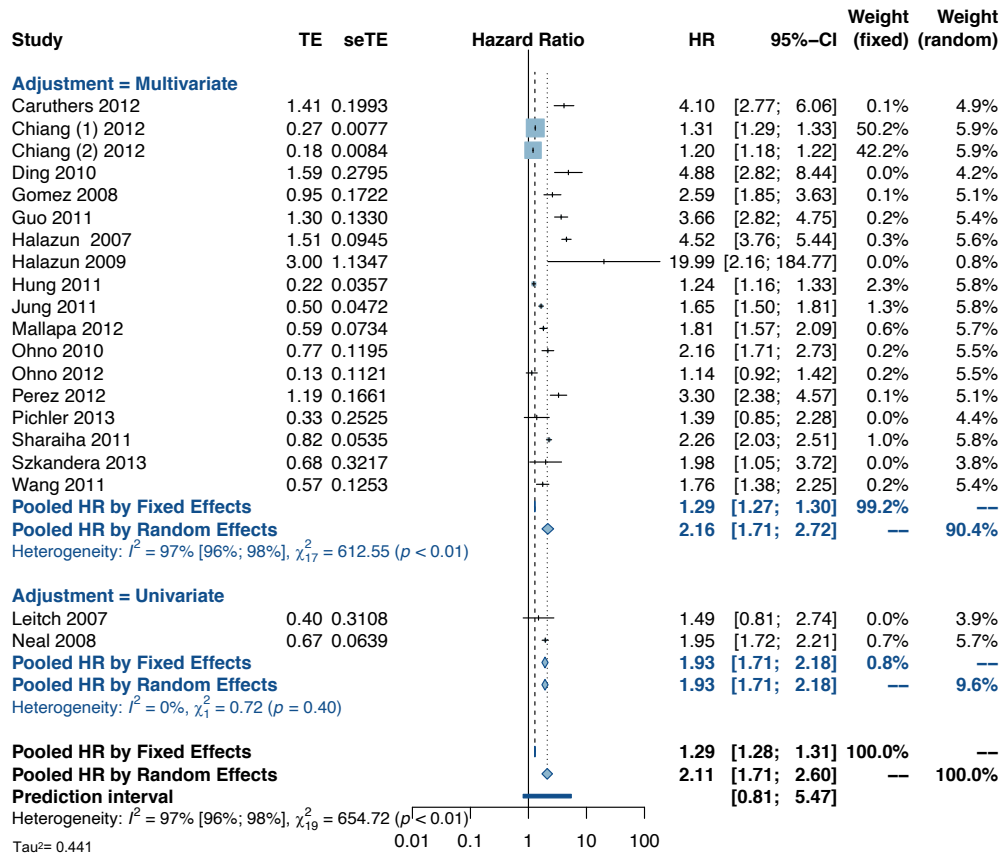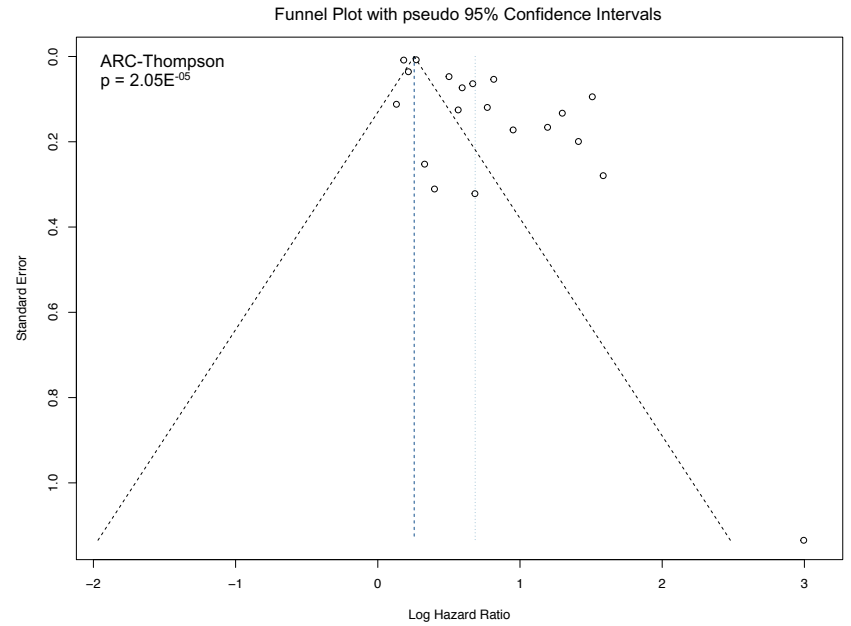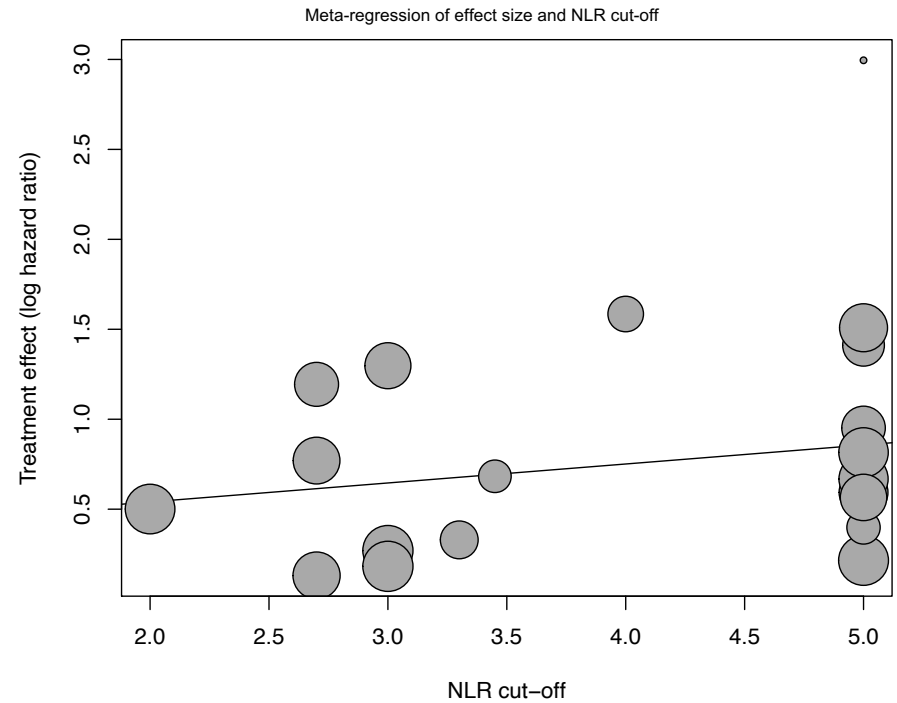

### Supplementary Figure 4 - NLR: PFS in Composite endpoints

| Study     | ES   | seES   | Hazard Ratio | HR   | 95%-CI       | Weight (fixed) | Weight (random) |
|-----------|------|--------|--------------|------|--------------|----------------|-----------------|
| Berardi   | 0.31 | 0.1344 |              | 1.36 | [1.04; 1.77] | 1.7%           | 5.4%            |
| Botta     | 0.69 | 0.3039 |              | 1.99 | [1.10; 3.61] | 0.3%           | 2.8%            |
| Botta     | 0.51 | 0.2618 |              | 1.67 | [1.00; 2.79] | 0.4%           | 3.3%            |
| Cetin     | 0.10 | 0.0355 |              | 1.11 | [1.04; 1.19] | 23.8%          | 6.7%            |
| Cho       | 0.39 | 0.1248 |              | 1.48 | [1.16; 1.89] | 1.9%           | 5.5%            |
| Chua      | 0.47 | 0.1762 |              | 1.60 | [1.13; 2.26] | 1.0%           | 4.6%            |
| Giordano  | 1.17 | 0.3217 |              | 3.21 | [1.71; 6.03] | 0.3%           | 2.6%            |
| Grenader  | 0.34 | 0.1080 |              | 1.40 | [1.13; 1.73] | 2.6%           | 5.8%            |
| Grenader  | 0.55 | 0.0424 |              | 1.73 | [1.59; 1.88] | 16.7%          | 6.7%            |
| Halazun   | 1.51 | 0.3076 |              | 4.52 | [2.47; 8.26] | 0.3%           | 2.8%            |
| He        | 0.41 | 0.1634 |              | 1.51 | [1.10; 2.08] | 1.1%           | 4.8%            |
| Huang     | 0.97 | 0.3708 |              | 2.63 | [1.27; 5.44] | 0.2%           | 2.2%            |
| Jafri     | 0.54 | 0.1636 |              | 1.72 | [1.25; 2.37] | 1.1%           | 4.8%            |
| Kaneko    | 0.18 | 0.4726 |              | 1.20 | [0.48; 3.03] | 0.1%           | 1.5%            |
| Keizman   | 1.04 | 0.2664 |              | 2.83 | [1.68; 4.77] | 0.4%           | 3.3%            |
| Keizman   | 1.26 | 0.3215 |              | 3.52 | [1.87; 6.61] | 0.3%           | 2.6%            |
| Lee       | 0.02 | 0.0292 |              | 1.02 | [0.96; 1.08] | 35.3%          | 6.8%            |
| Pinato    | 0.59 | 0.3536 |              | 1.80 | [0.90; 3.60] | 0.2%           | 2.3%            |
| Rossi     | 0.41 | 0.1331 |              | 1.51 | [1.16; 1.96] | 1.7%           | 5.4%            |
| Templeton | 0.26 | 0.0627 |              | 1.30 | [1.15; 1.47] | 7.6%           | 6.5%            |
| Wu        | 0.43 | 0.2135 |              | 1.54 | [1.01; 2.34] | 0.7%           | 4.0%            |
| Zeng      | 0.58 | 0.1982 |              | 1.79 | [1.21; 2.64] | 0.8%           | 4.3%            |
| Zhang     | 0.43 | 0.1435 |              | 1.54 | [1.16; 2.04] | 1.5%           | 5.2%            |

**Pooled HR by Fixed Effects** 1.25 [1.21; 1.30] 100.0% --  
**Pooled HR by Random Effects** 1.63 [1.43; 1.86] -- 100.0%  
**Prediction interval** [0.94; 2.81]

Heterogeneity:  $I^2 = 89\%$  [84%; 92%],  $\chi^2_{22} = 192.17$  ( $p < 0.01$ )

Tau<sup>2</sup> = 0.254

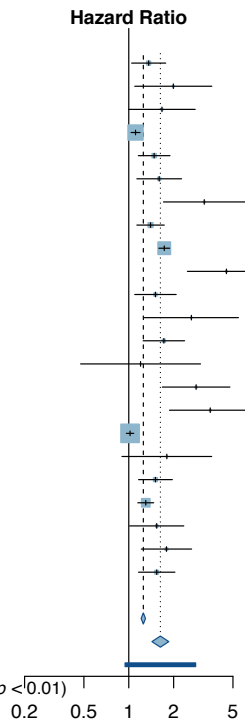

Funnel Plot with pseudo 95% Confidence Intervals

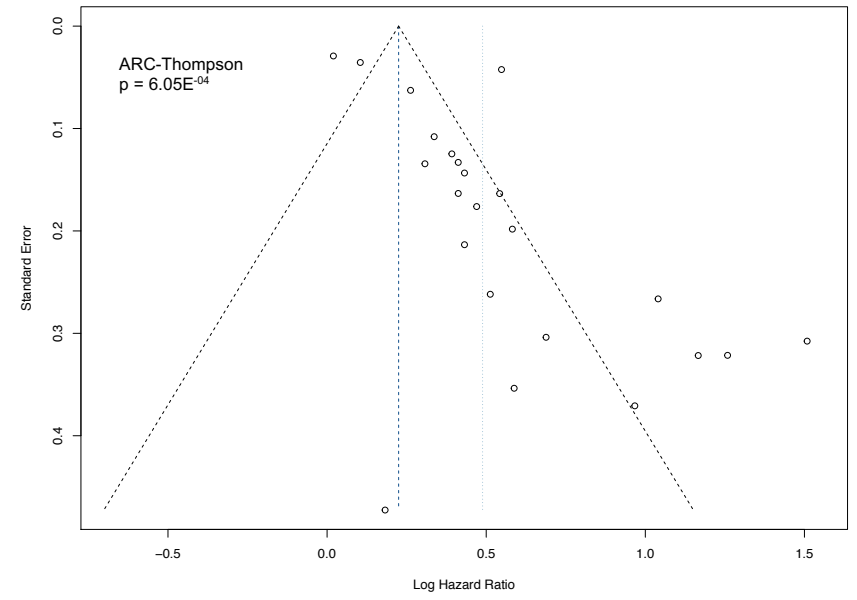

Meta-regression of effect size and NLR cut-off

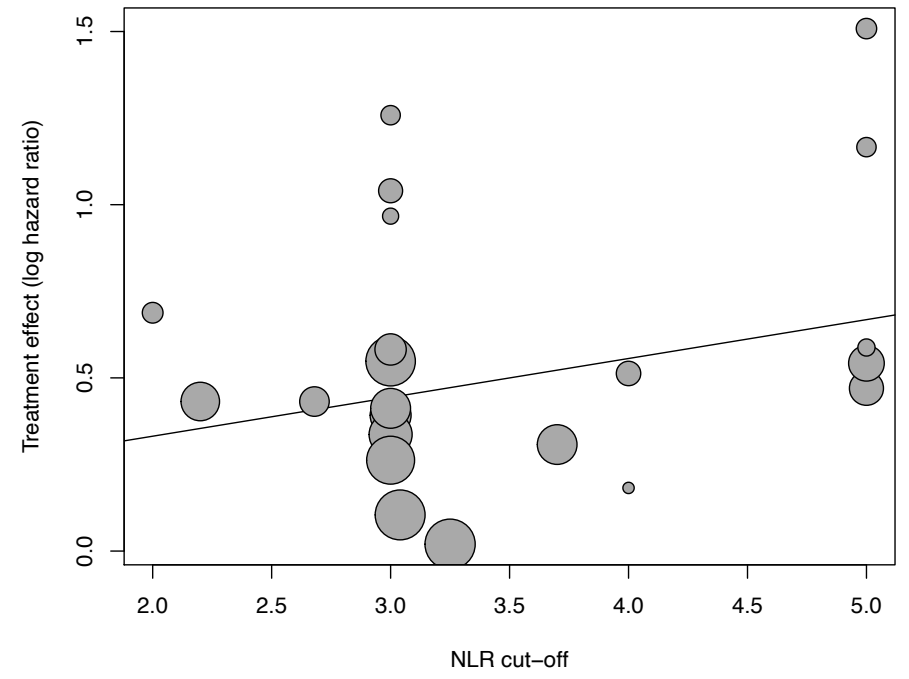

### Supplementary Figure 5 - IN: CSS in Composite endpoints

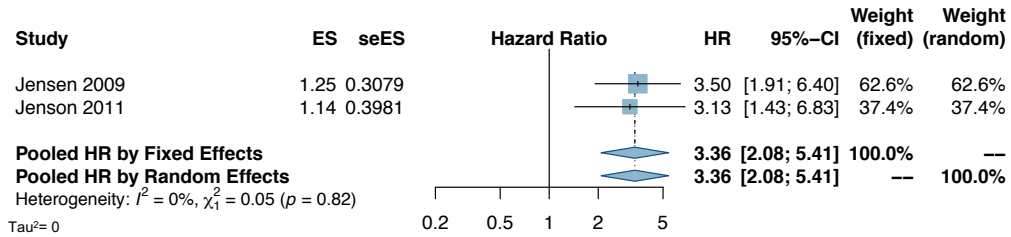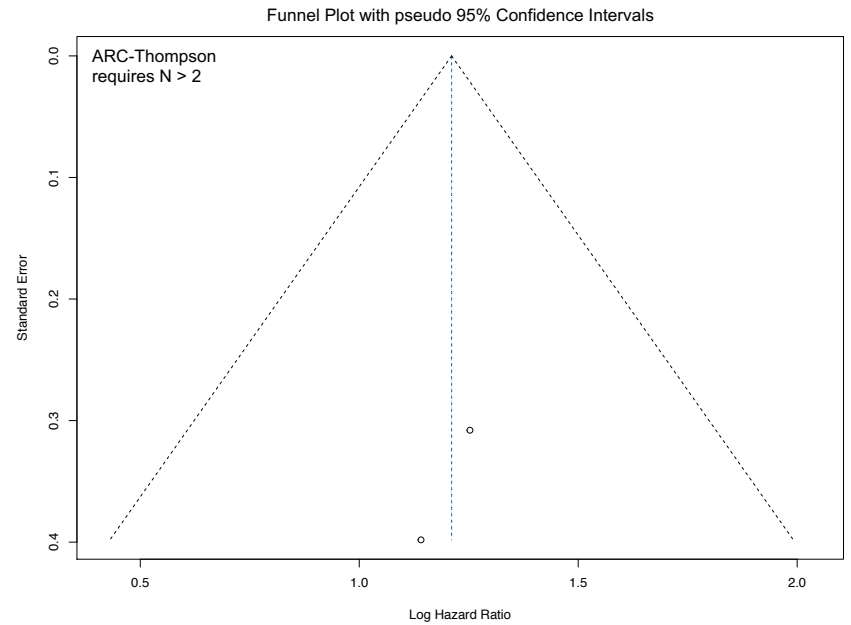

### Supplementary Figure 6 – IN: OS in Composite endpoints

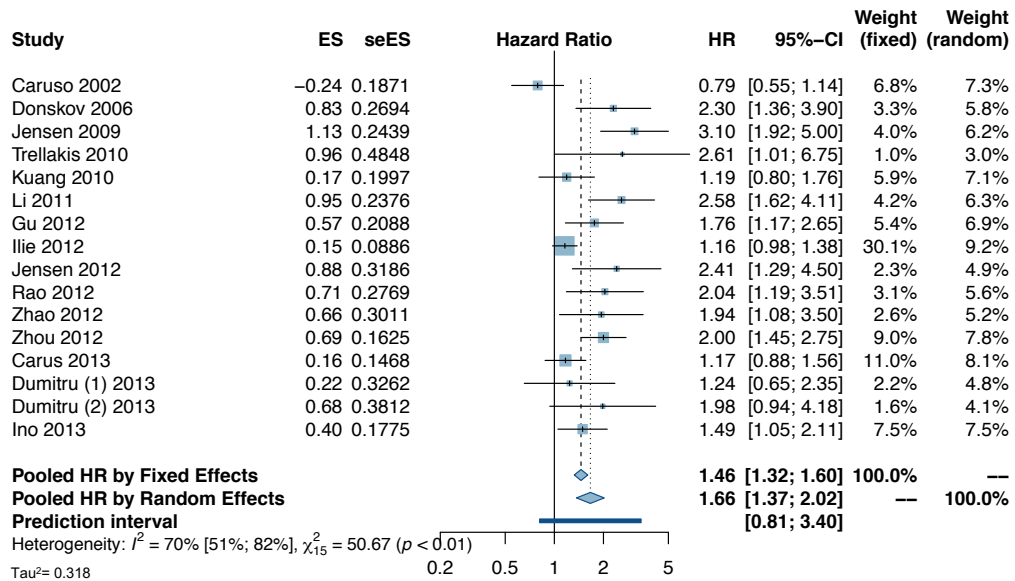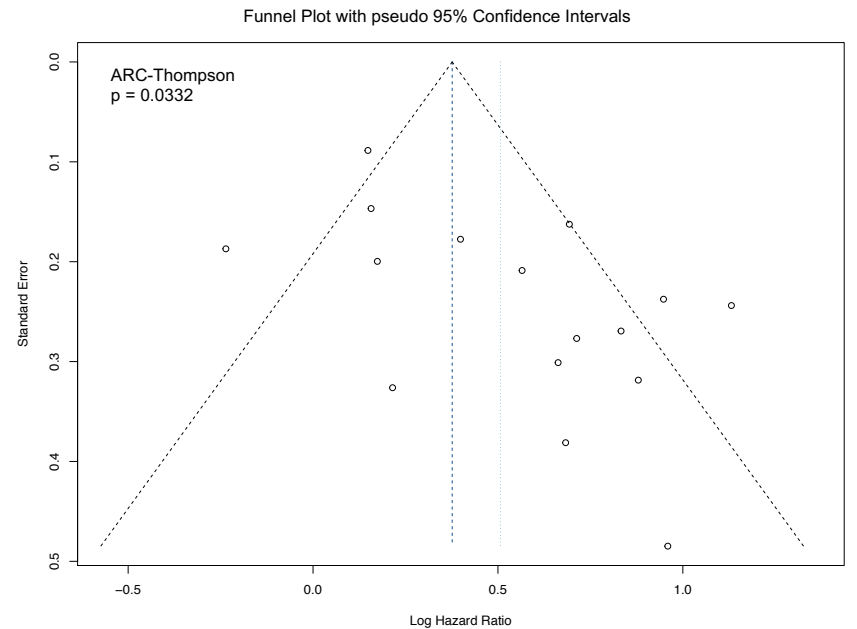

**Supplementary Figure 7 – PN: OS in Composite endpoints**

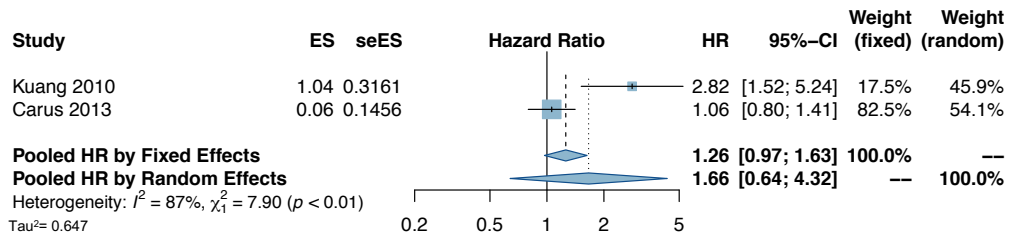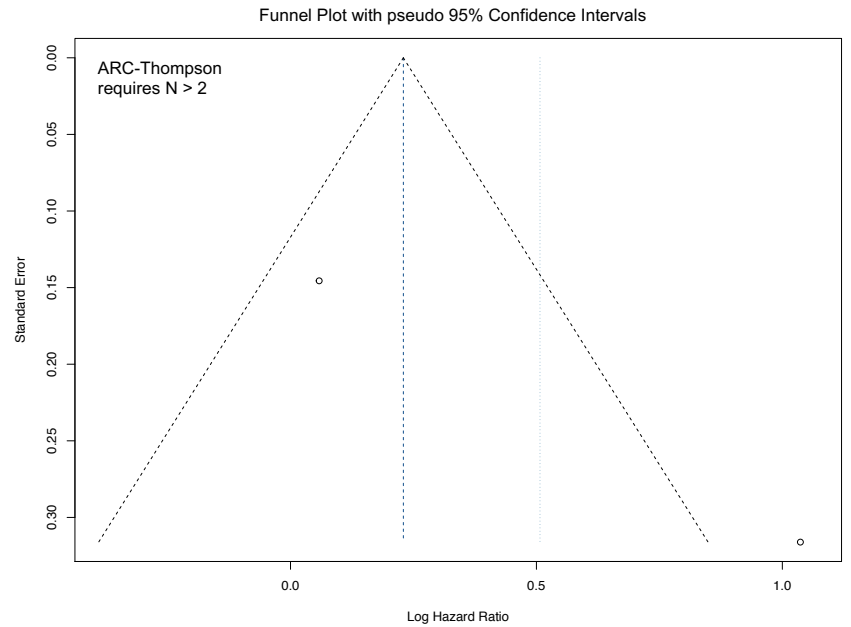

**Supplementary Figure 8 – SN: OS in Composite endpoints**

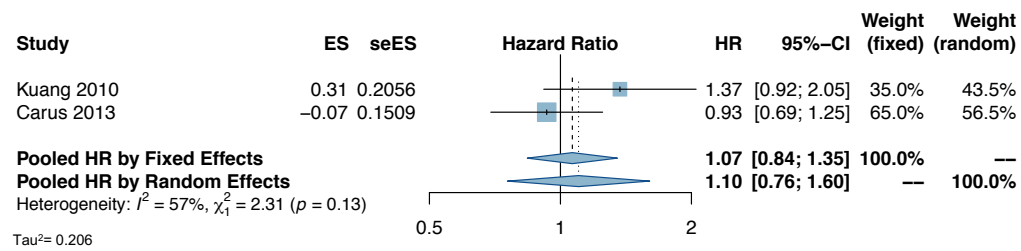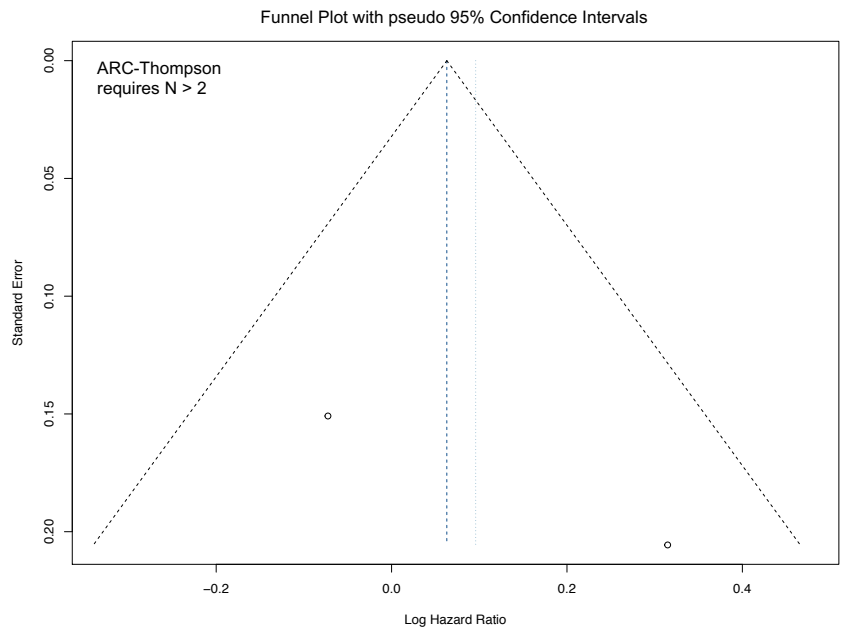



Supplementary Figure 10 - NLR: CSS in all operable cancers

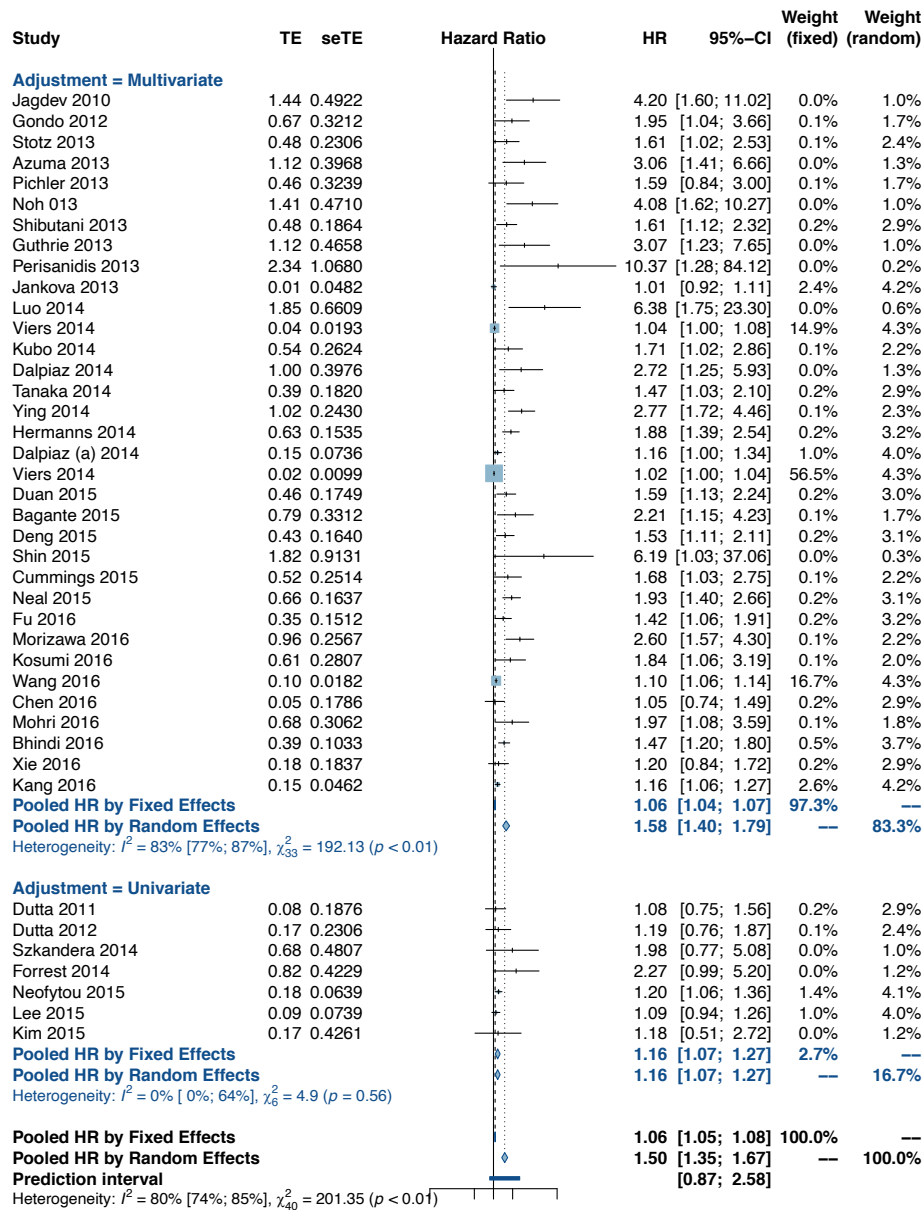

Tau<sup>2</sup> = 0.262

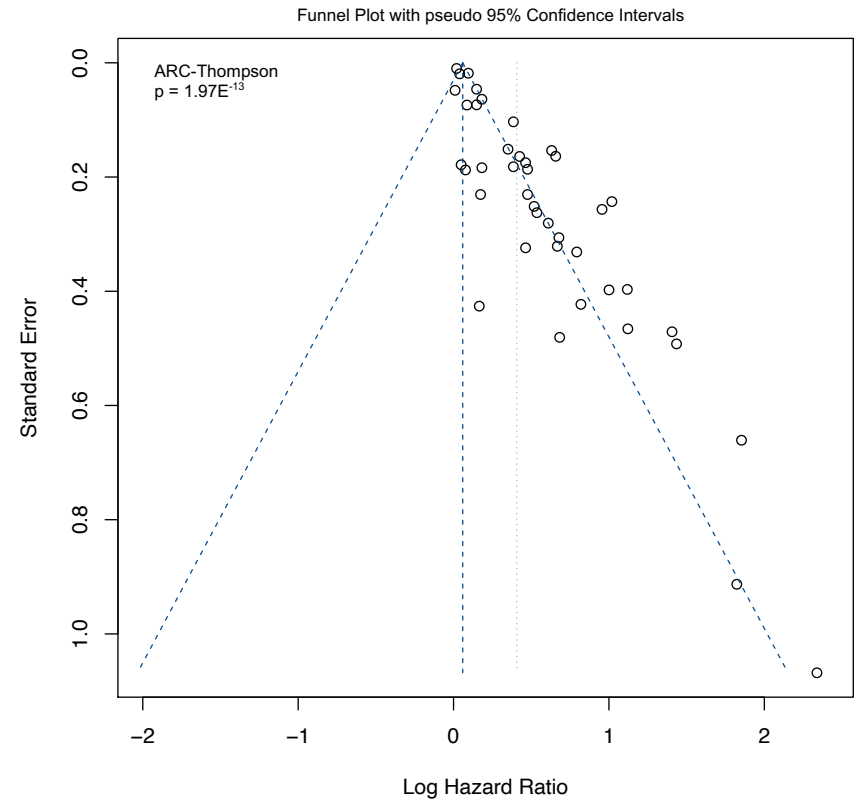



Supplementary Figure 11 - NLR: OS in advanced cancer with immunotherapy

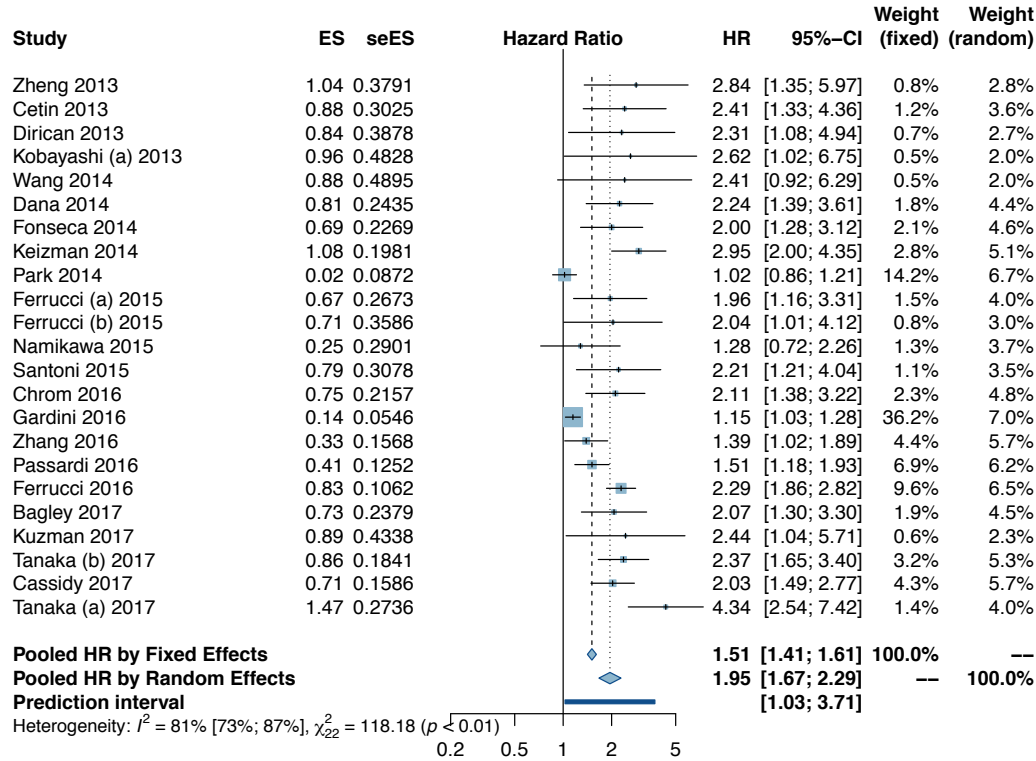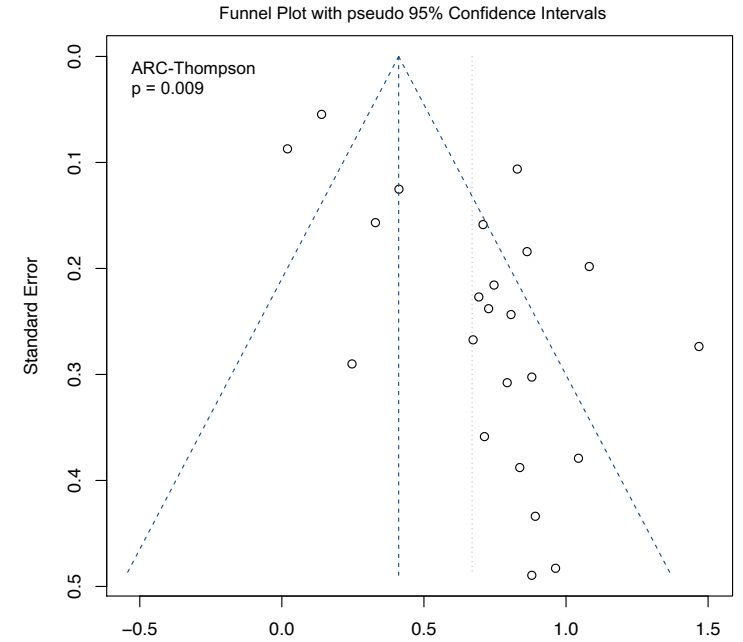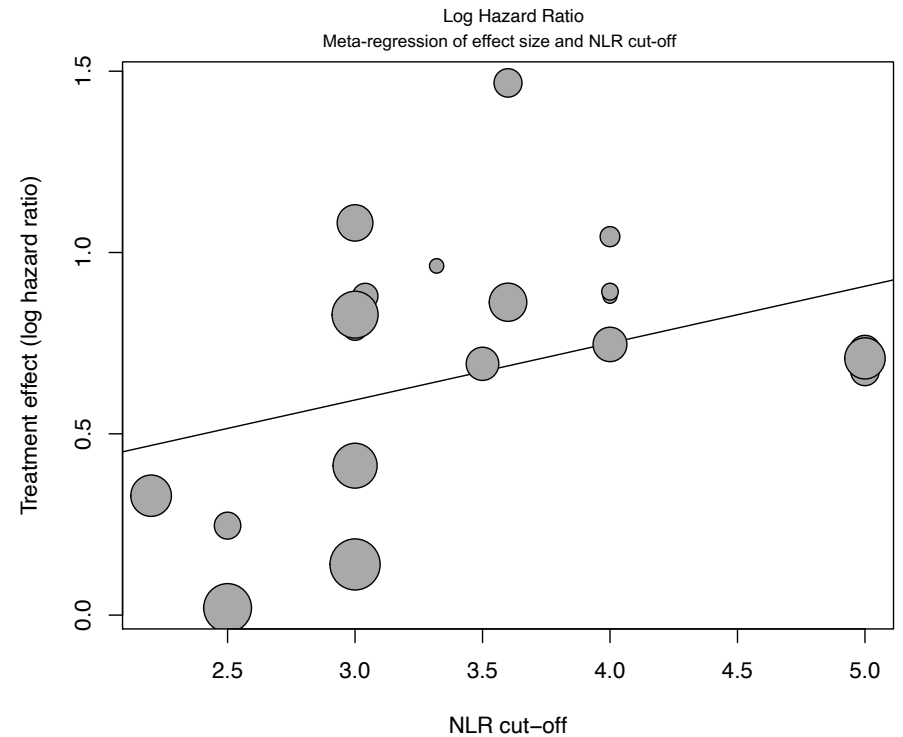

Supplementary Figure 12 - NLR: OS in advanced cancer with anti-VEGFR

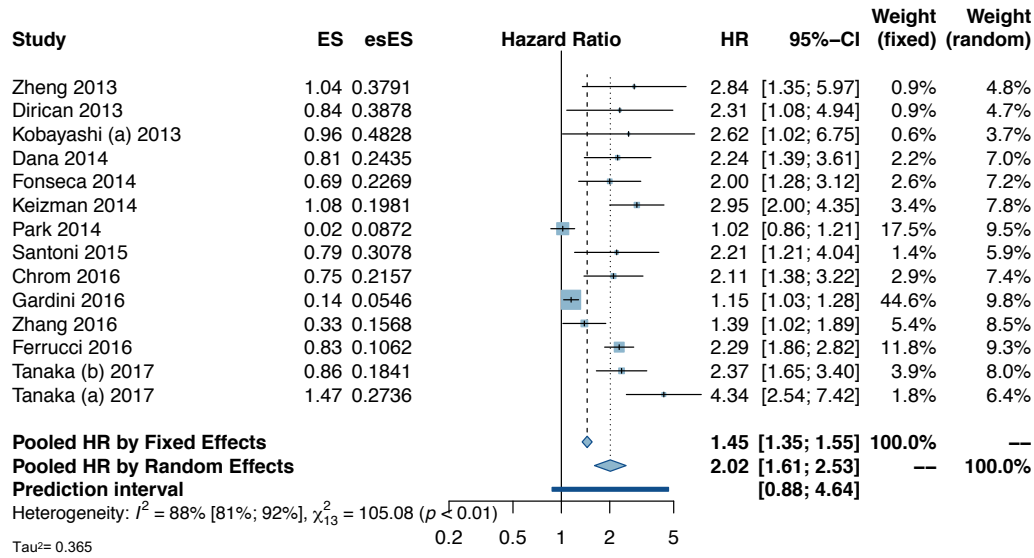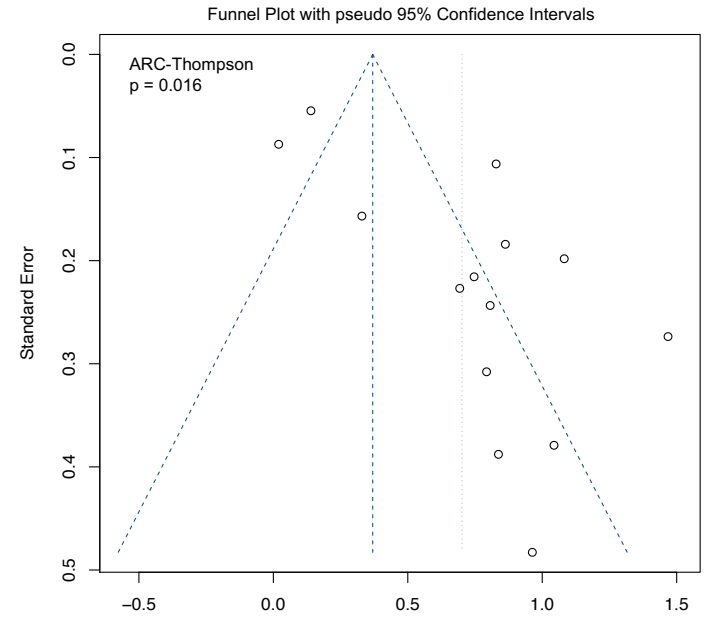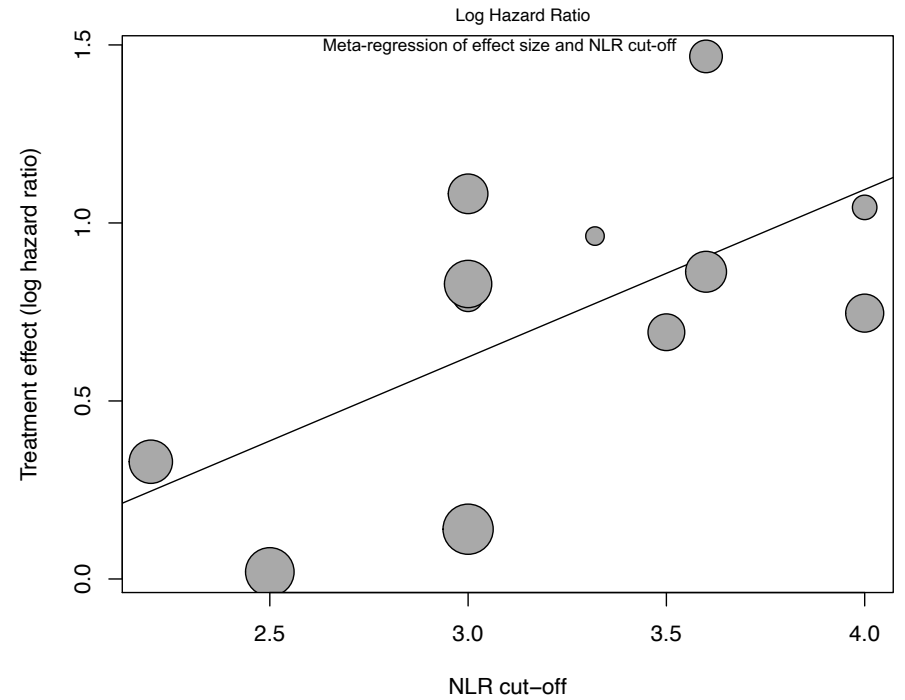

Supplementary Figure 13 - NLR: OS with immune checkpoint inhibitors

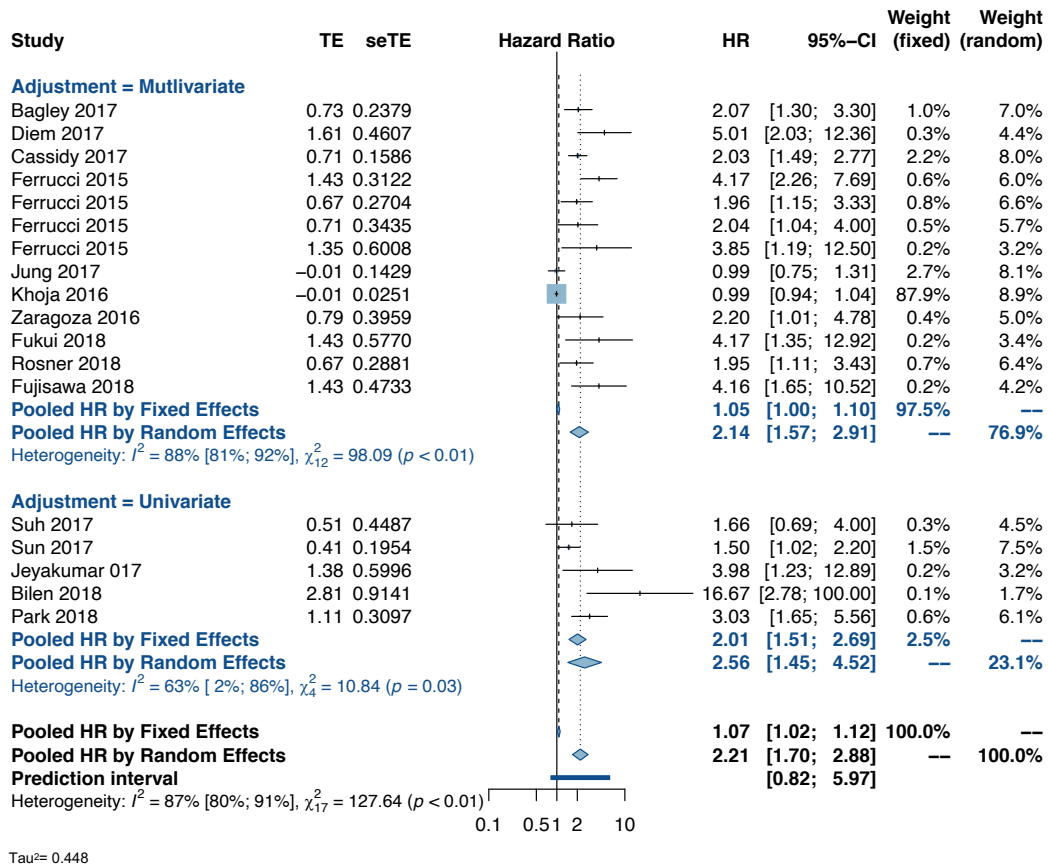

Tau<sup>2</sup> = 0.448

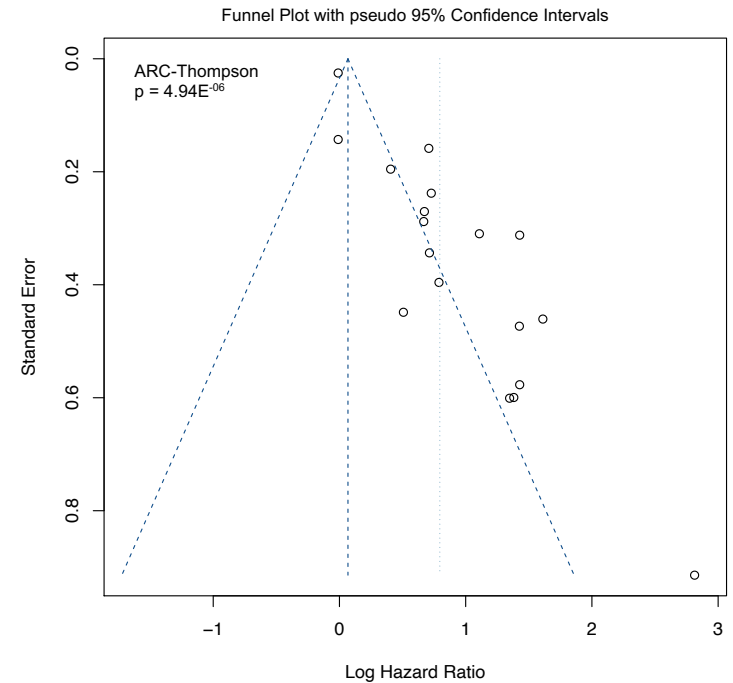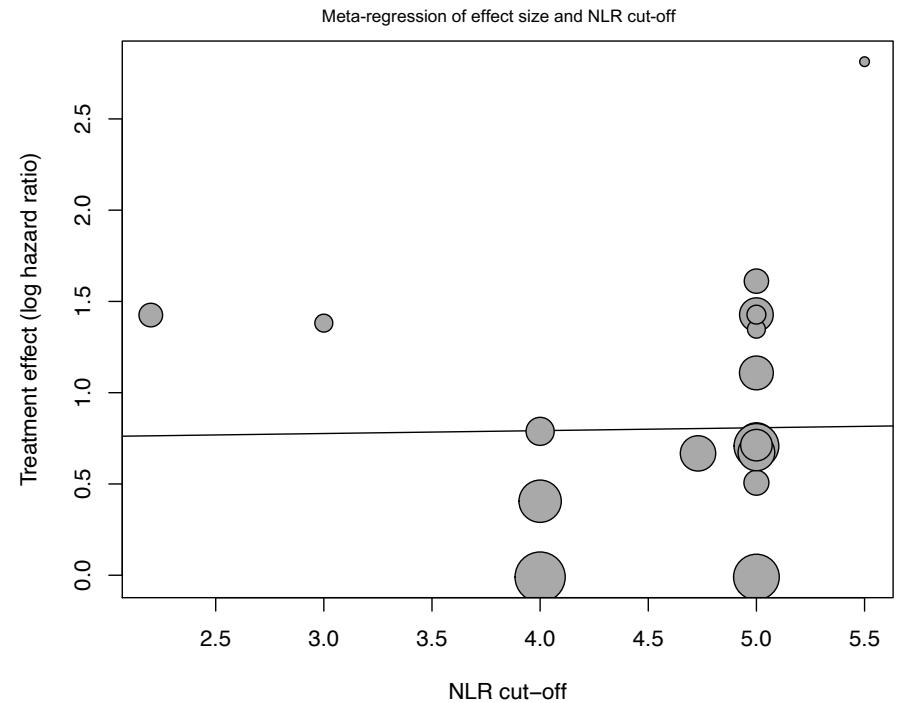

### Supplementary Figure 14 - NLR: PFS in advanced cancer with immunotherapy

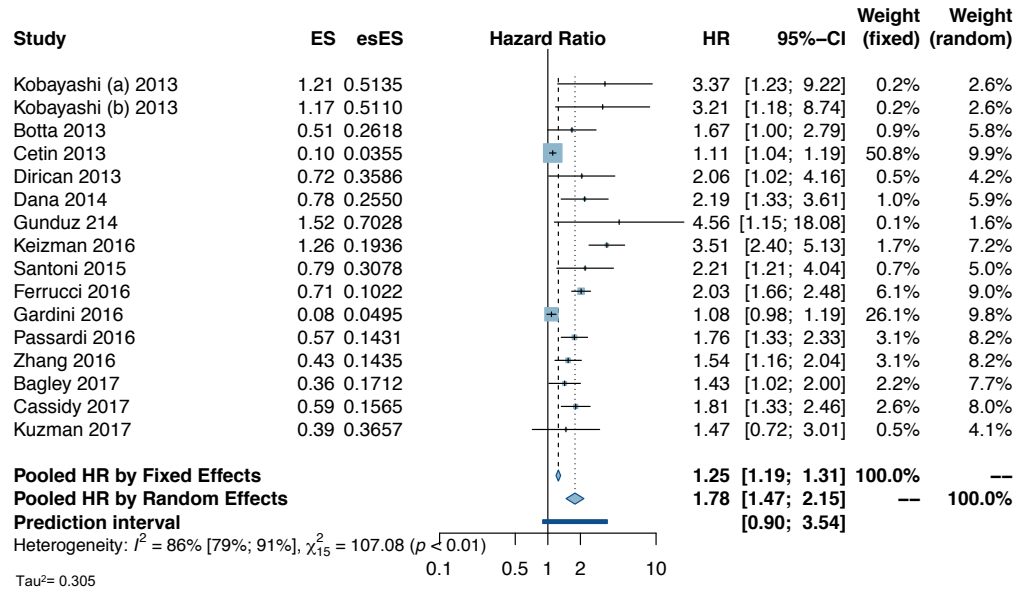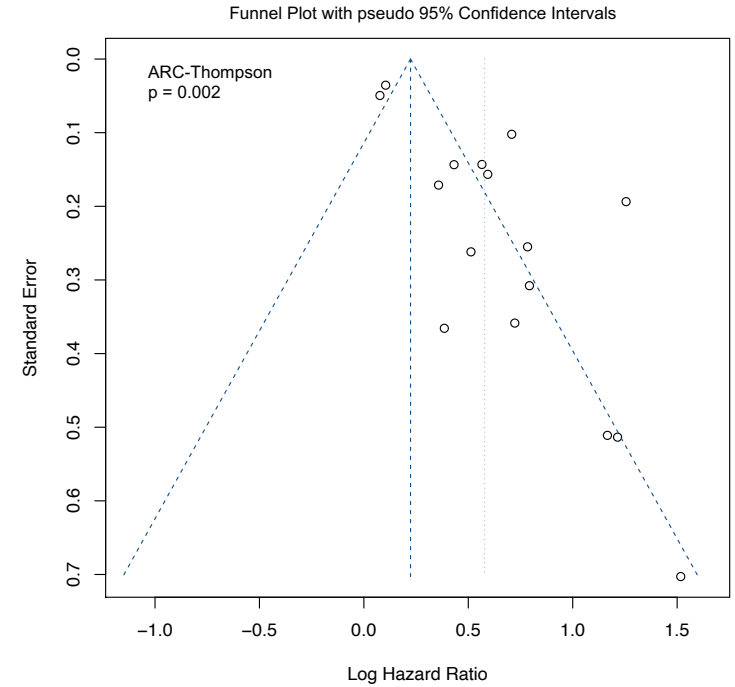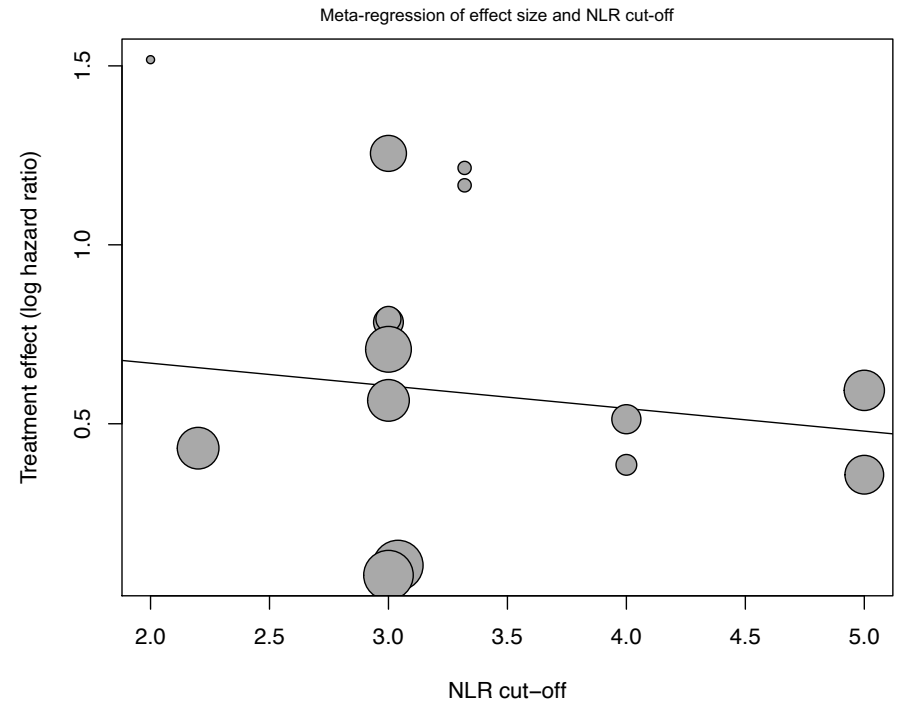

Supplementary Figure 15 - NLR: PFS with immune checkpoint inhibitors

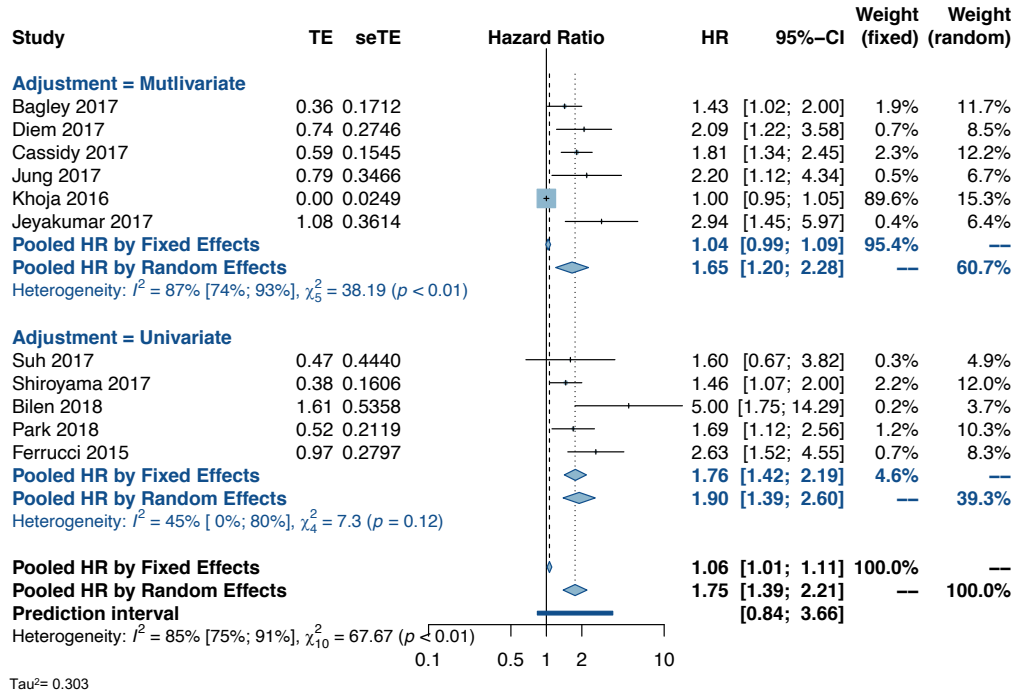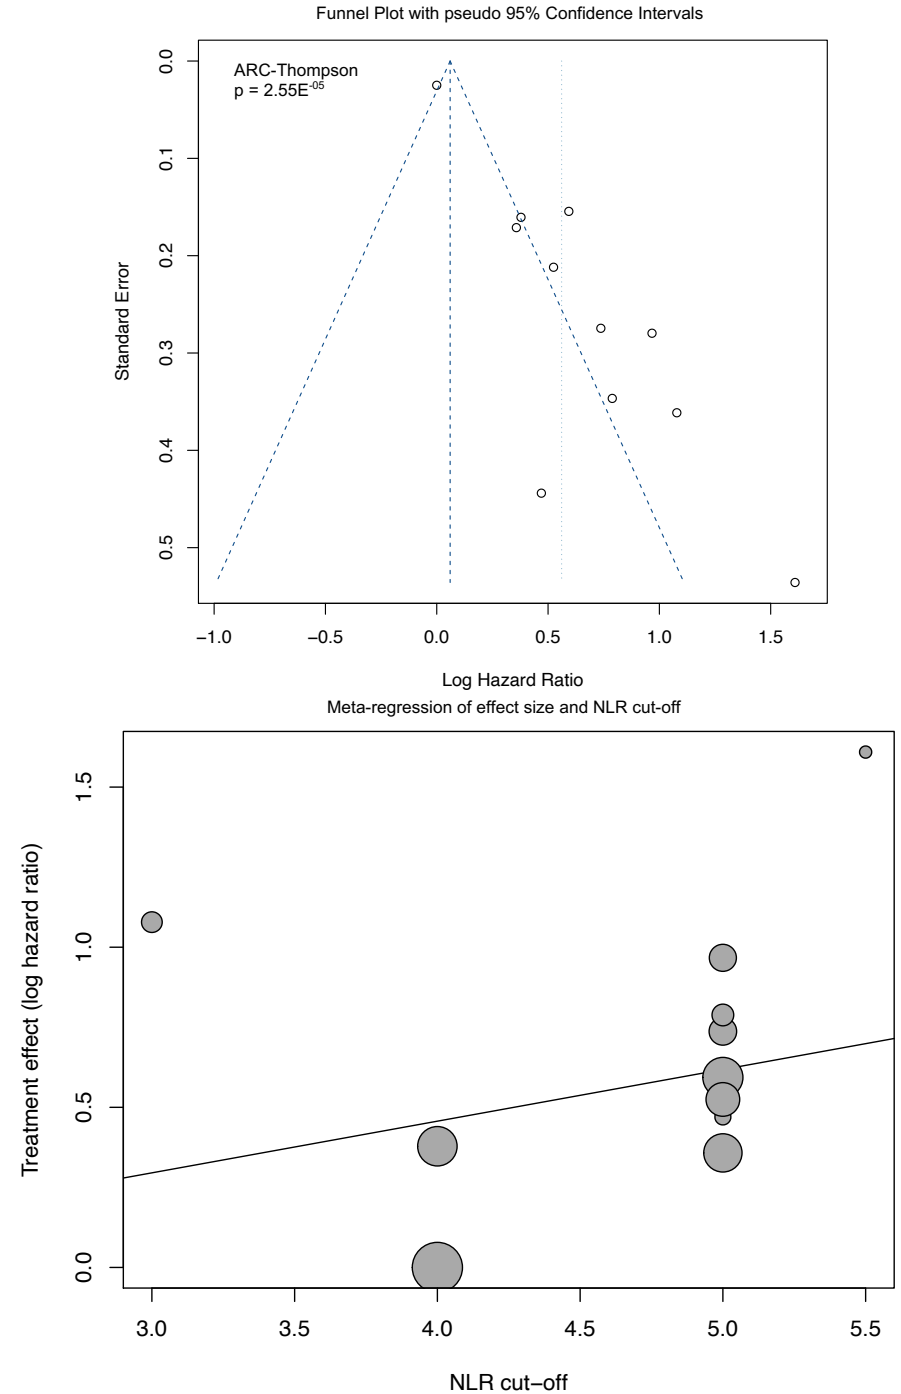

### Supplementary Figure 16 - NLR: OS with neoadjuvant chemotherapy

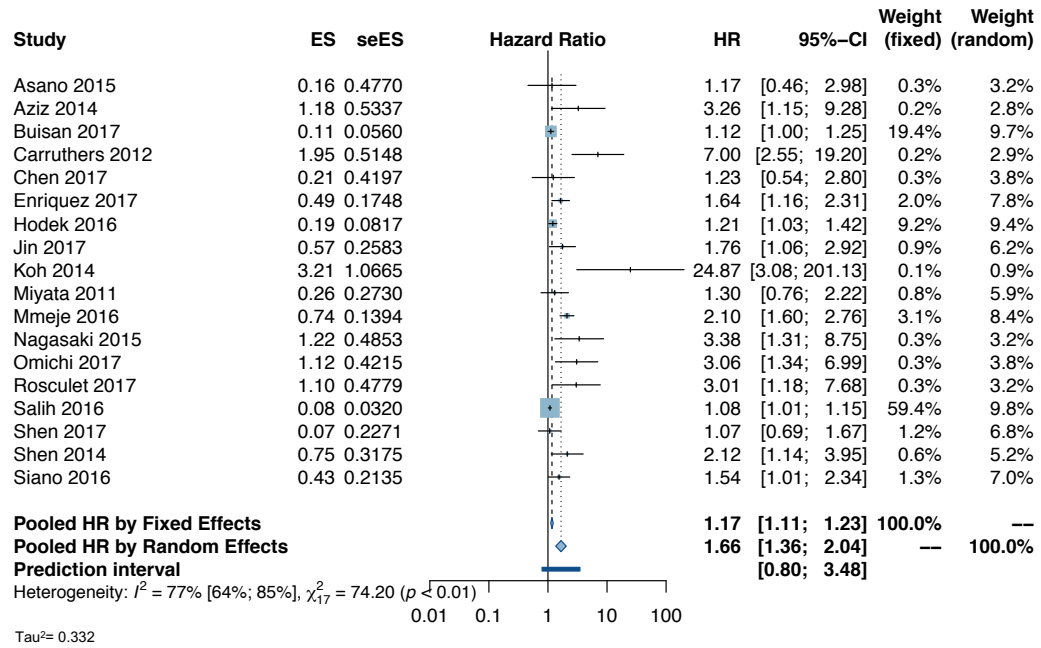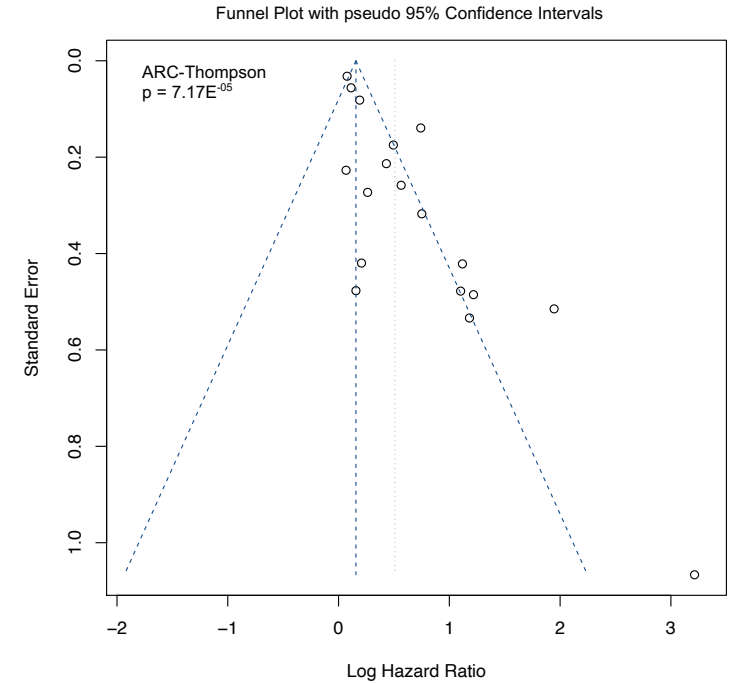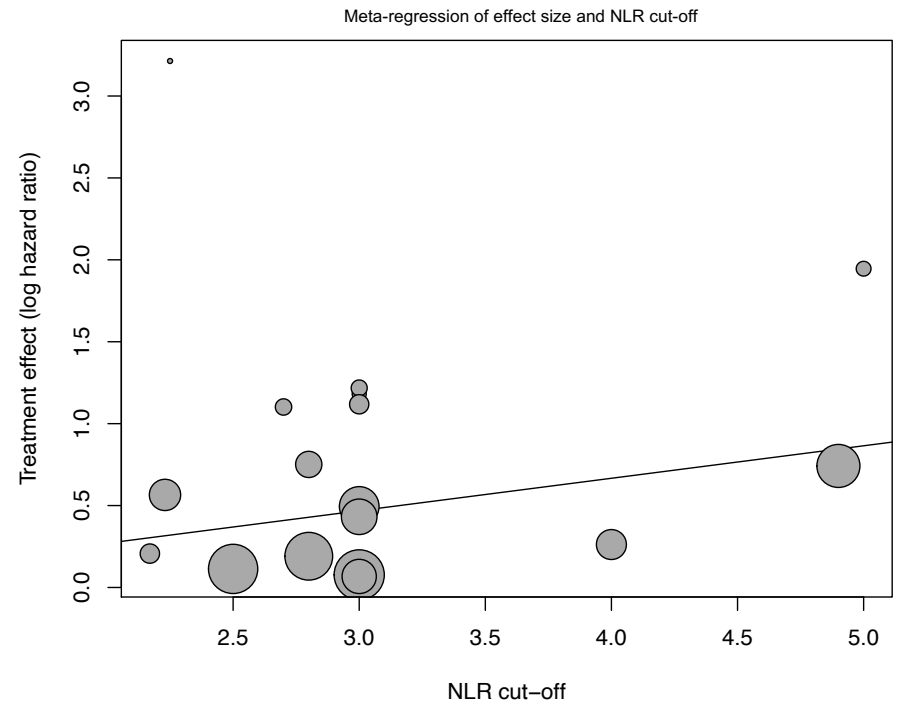

Supplementary Figure 17 - NLR: RFS with neoadjuvant chemotherapy

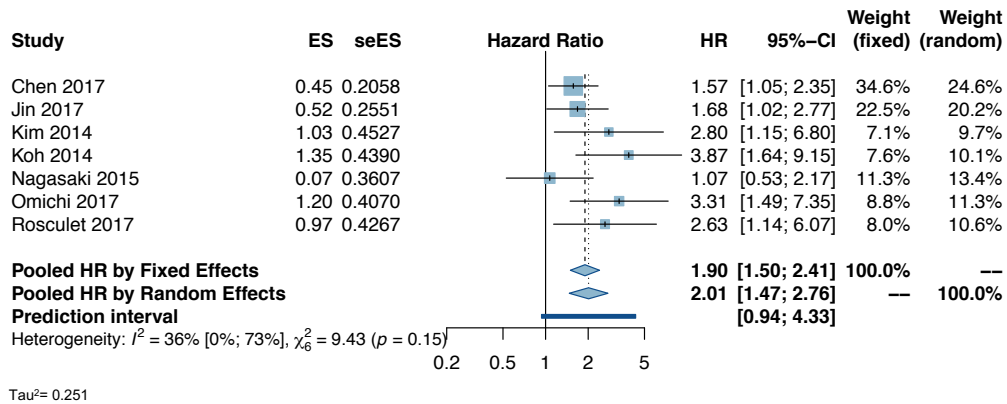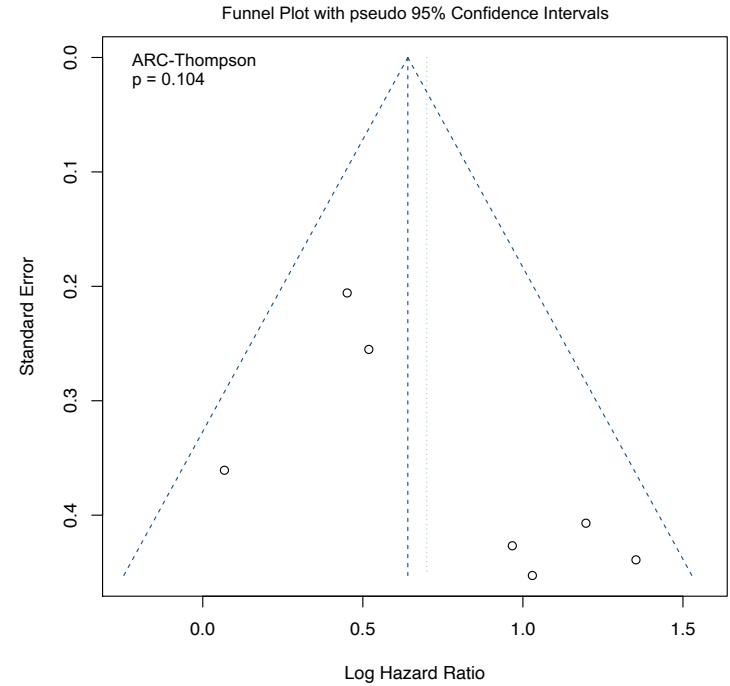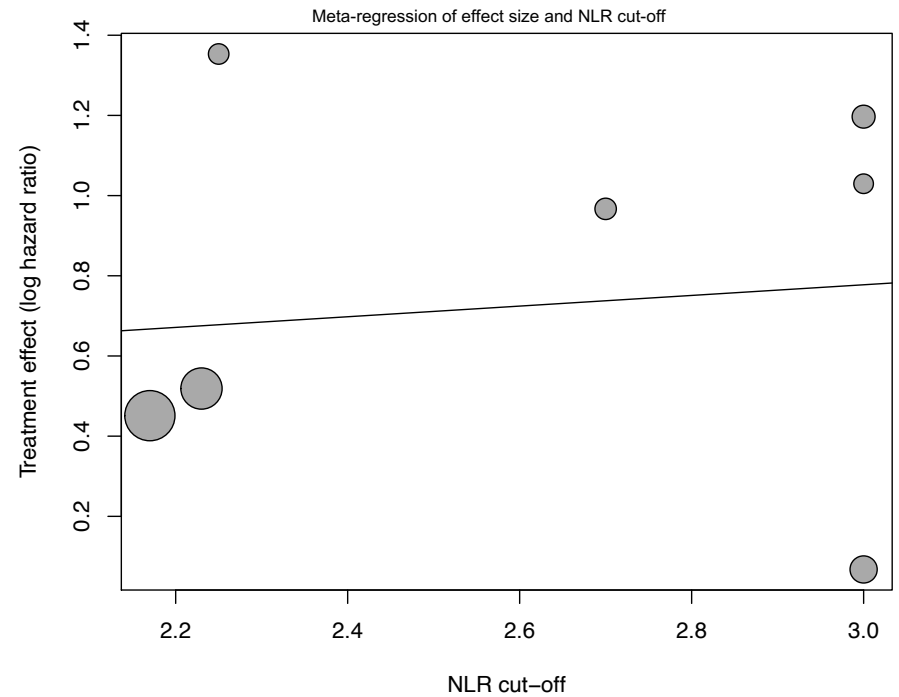

Supplementary Figure 18 - NLR: CSS with neoadjuvant chemotherapy

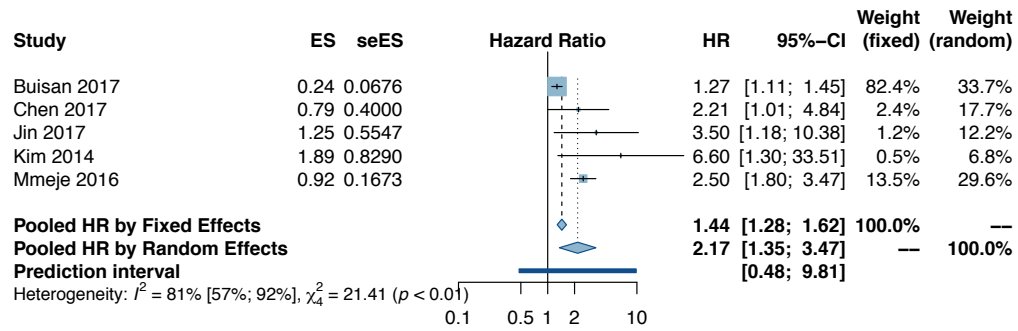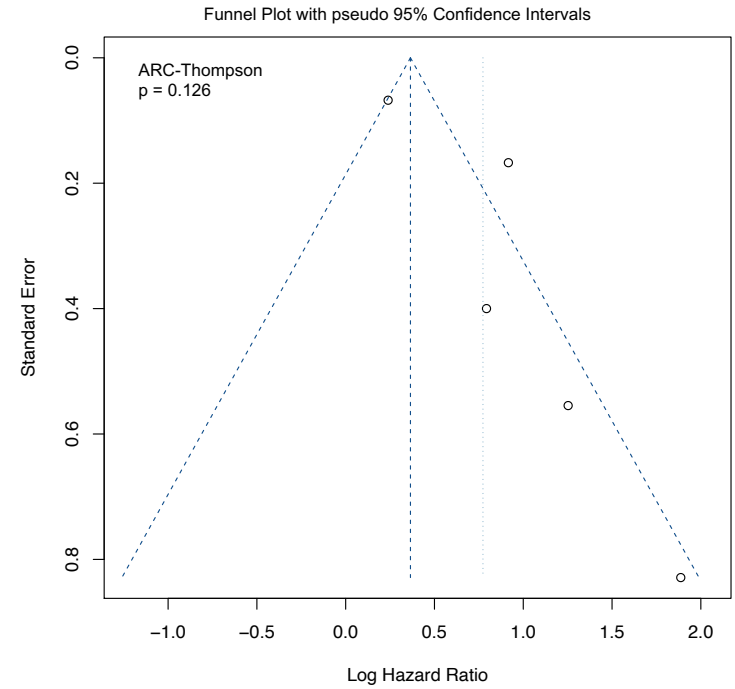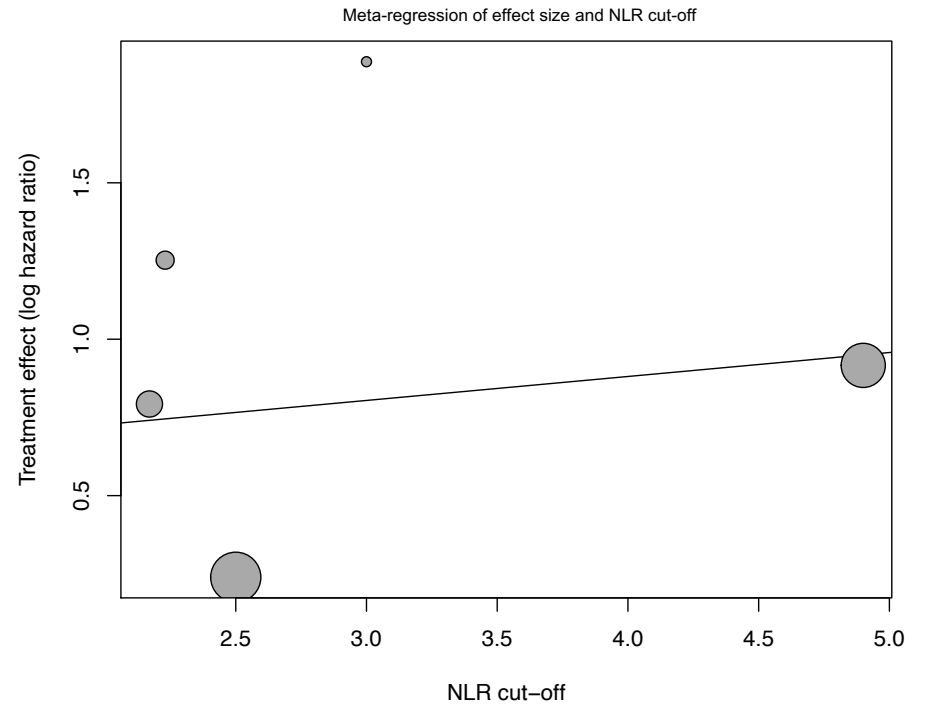



Supplementary Figure 19 – IN: OS in gastric cancers

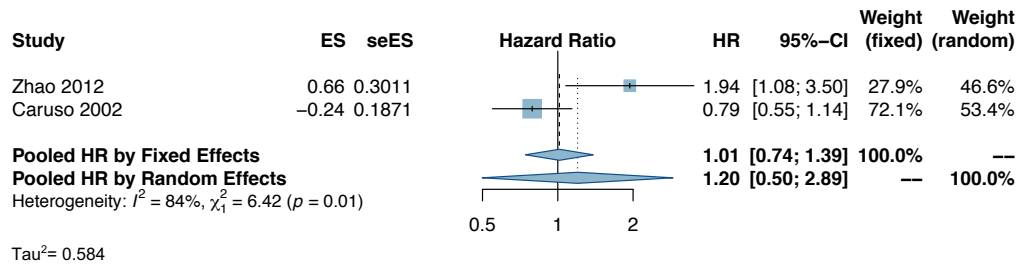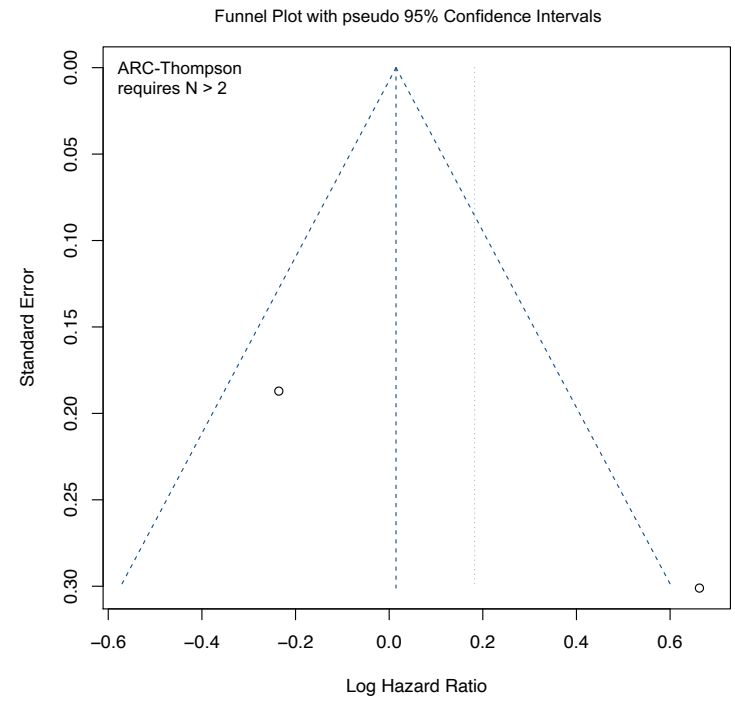

### Supplementary Figure 20 - NLR: OS in gastric cancers

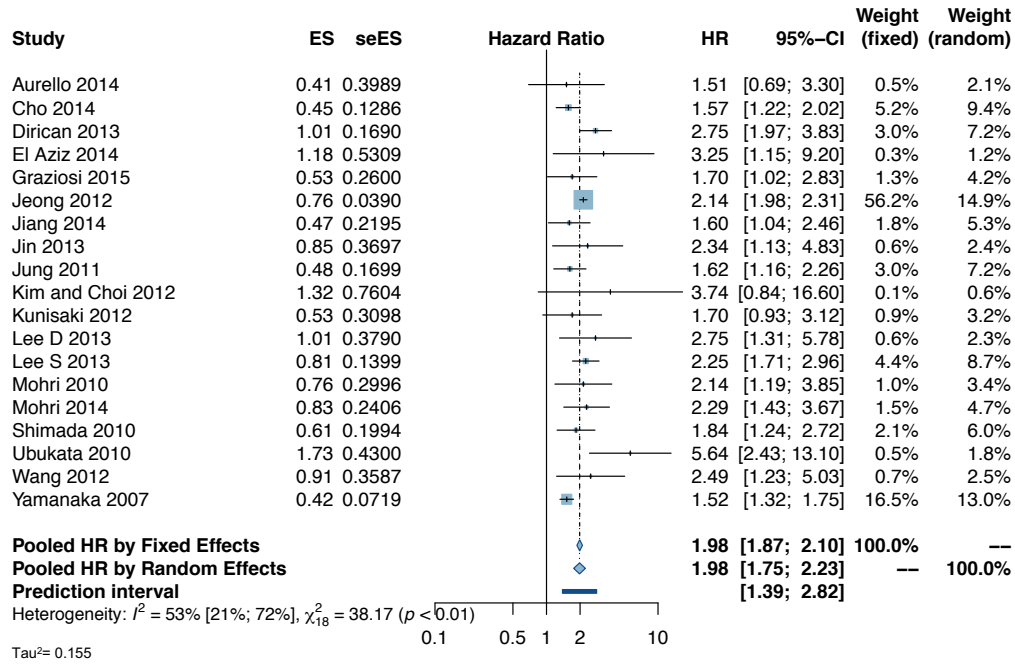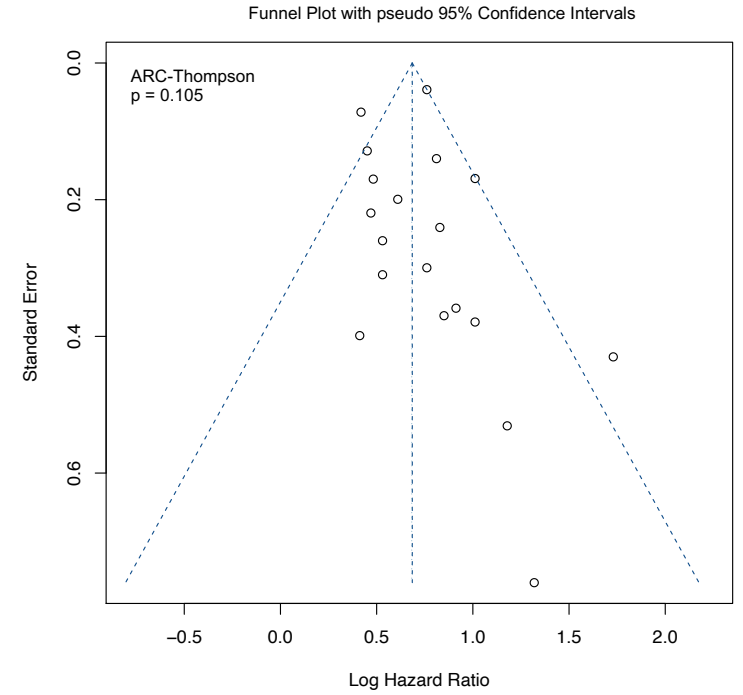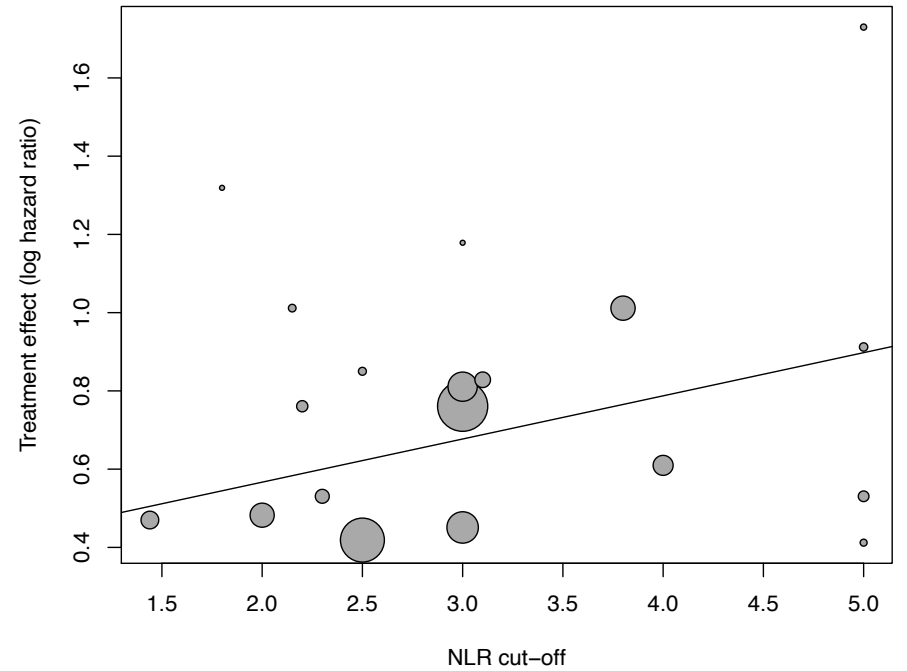

Supplementary Figure 21 - NLR: OS in gastric cancer with resection

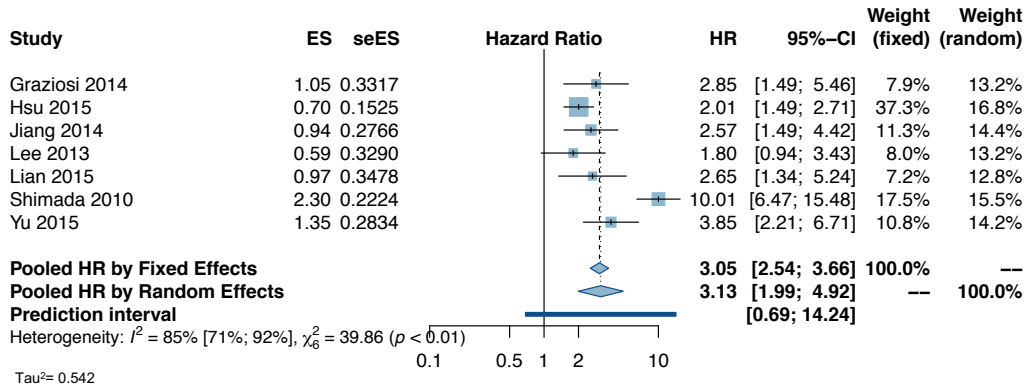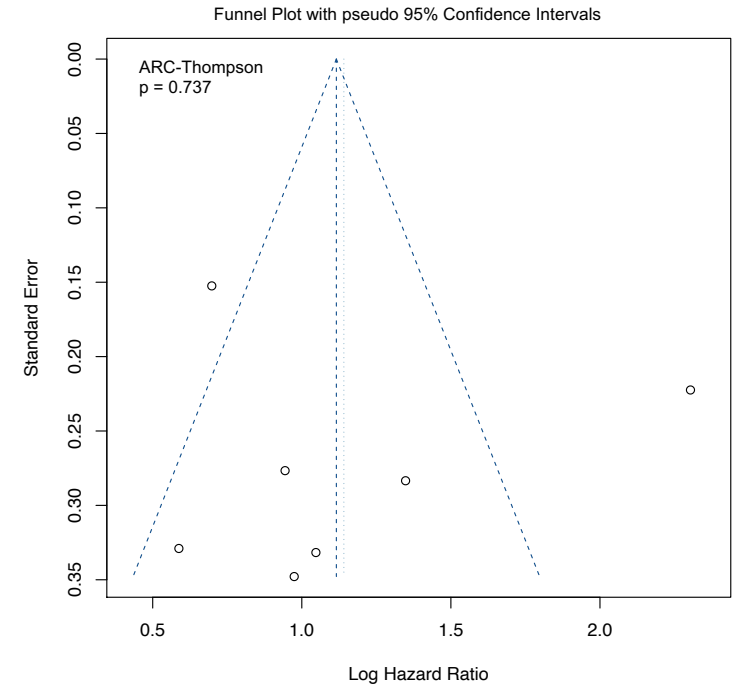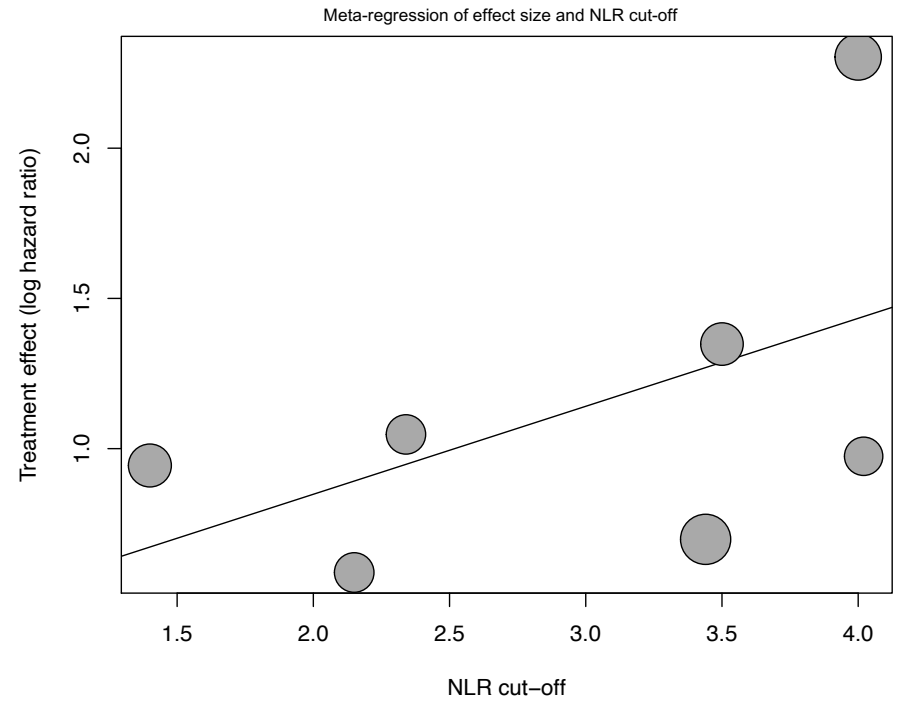

**Supplementary Figure 22 - NLR: OS in gastrointestinal stromal cancer**

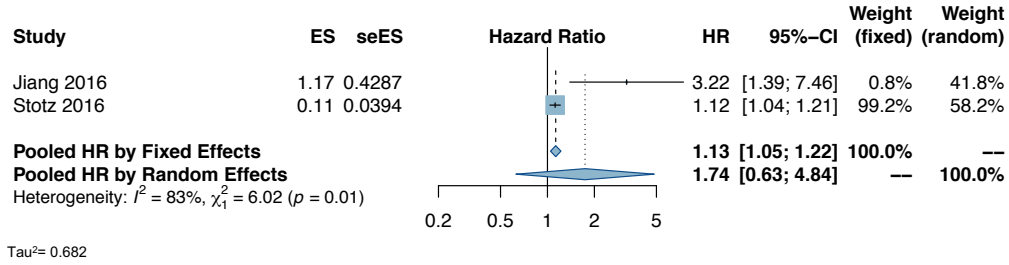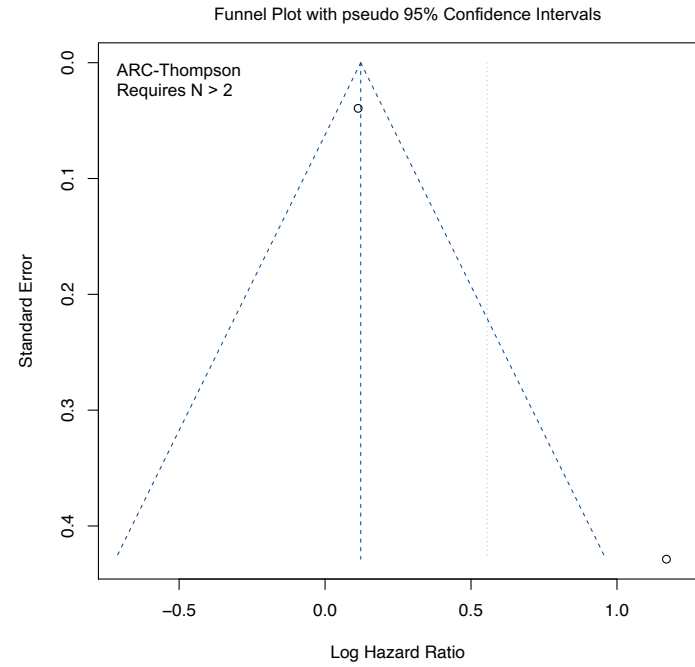

**Supplementary Figure 23 - NLR: PFS in gastric cancers**

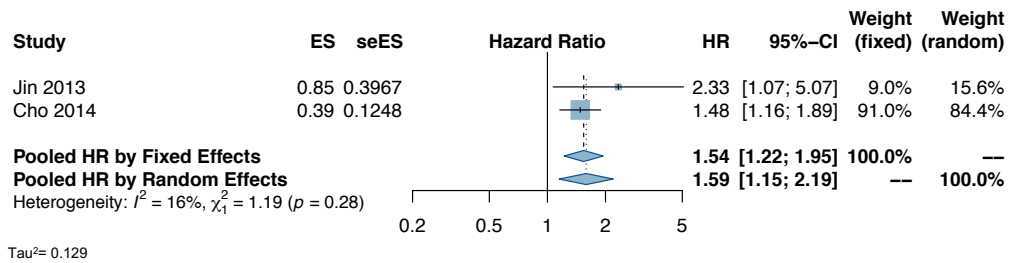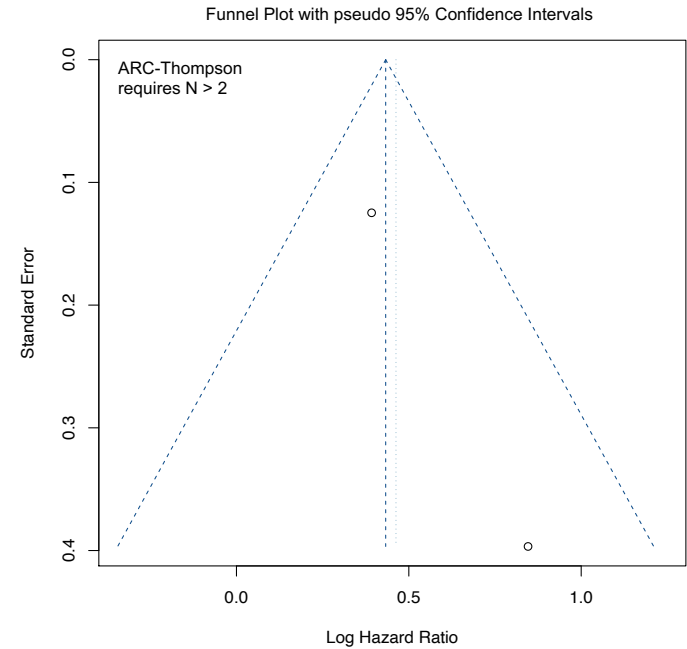

Supplementary Figure 24 - NLR: DFSin gastric cancers

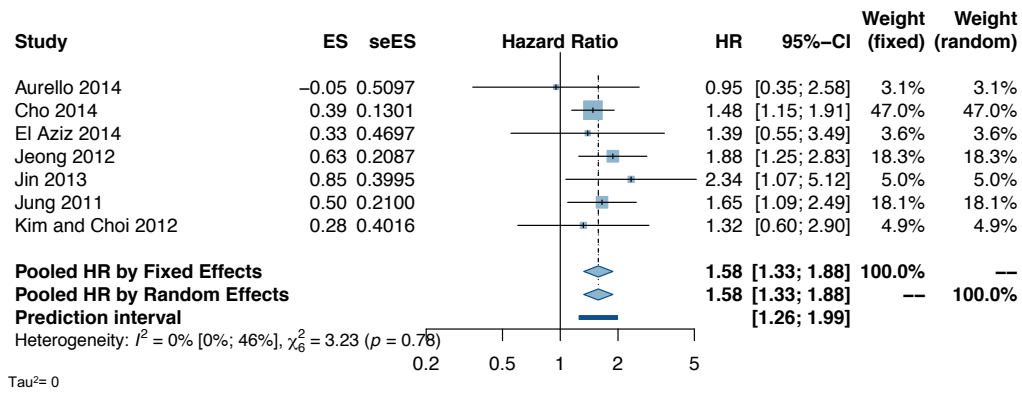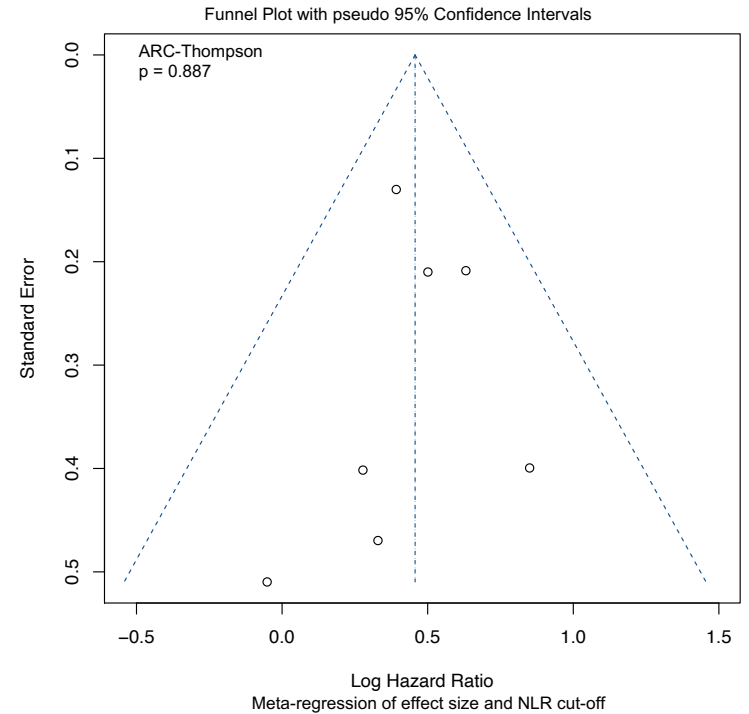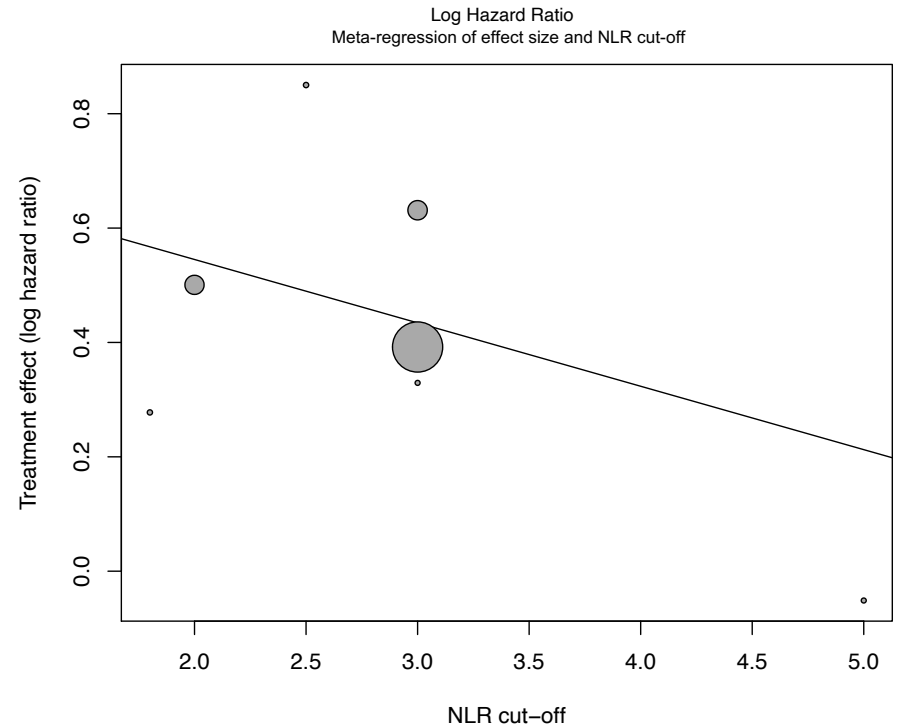

Supplementary Figure 25 - NLR: DFS in gastric cancers with resection

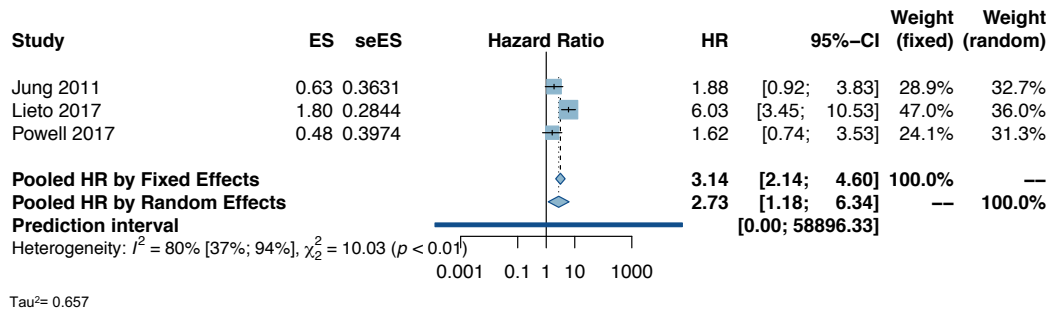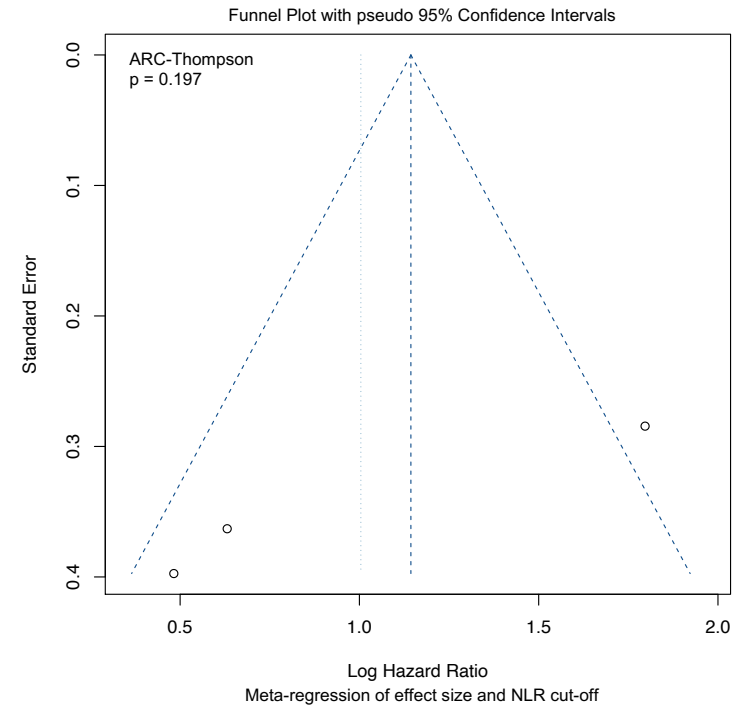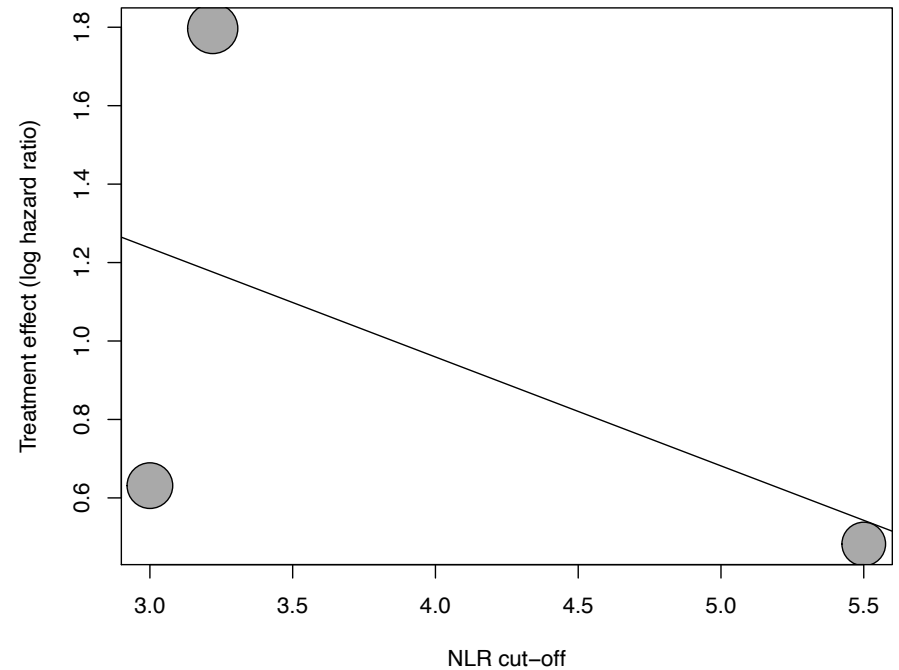

Supplementary Figure 26 - NLR: OS in colorectal cancer

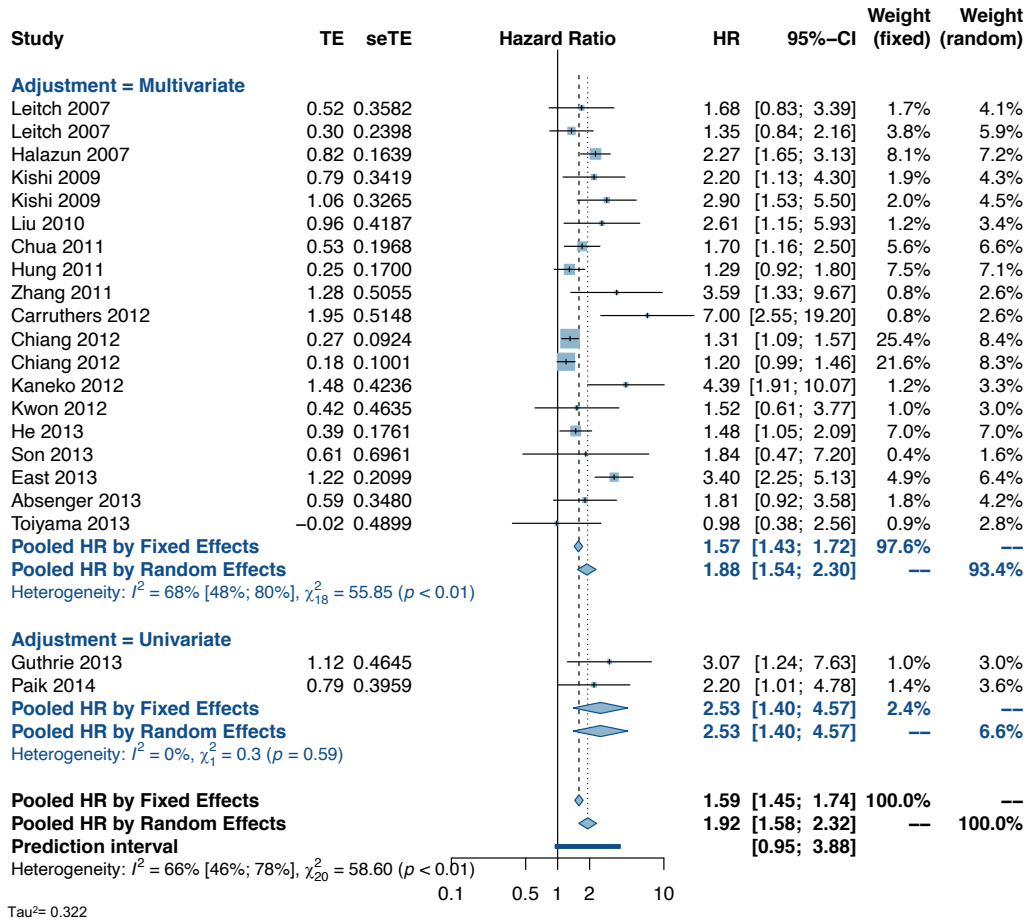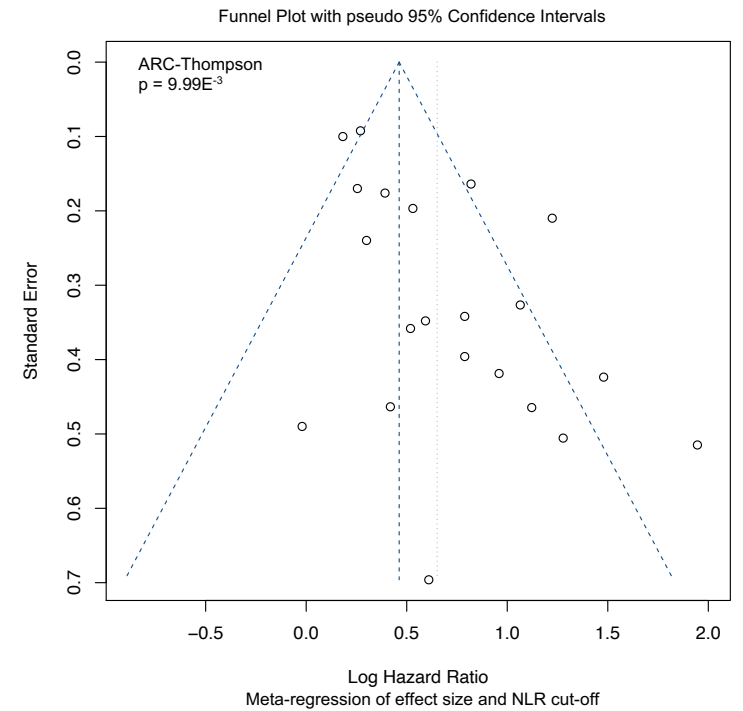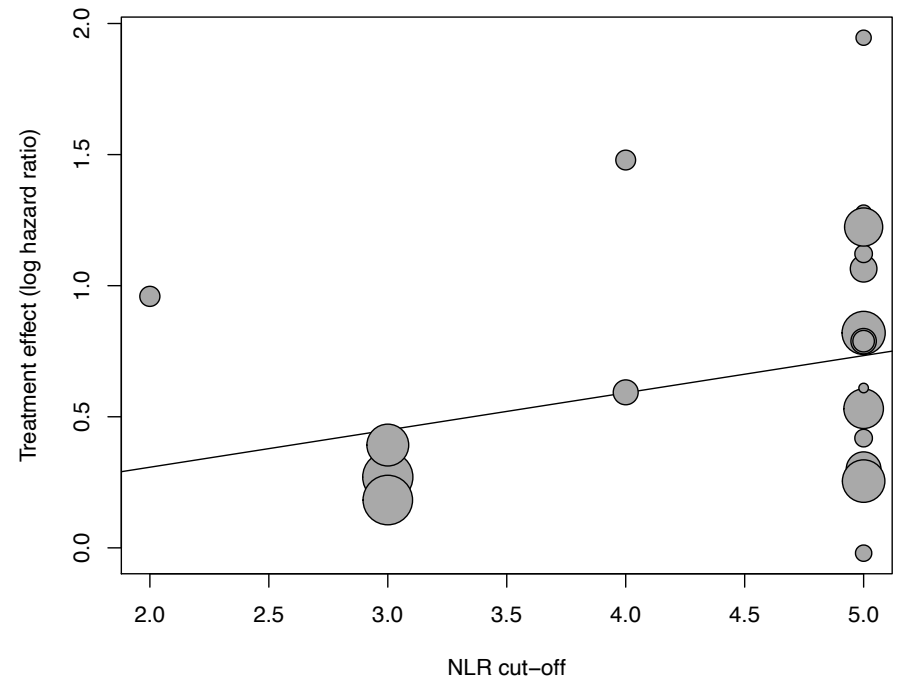

Supplementary Figure 27 - NLR: DFS in colorectal cancer with palliative chemotherapy

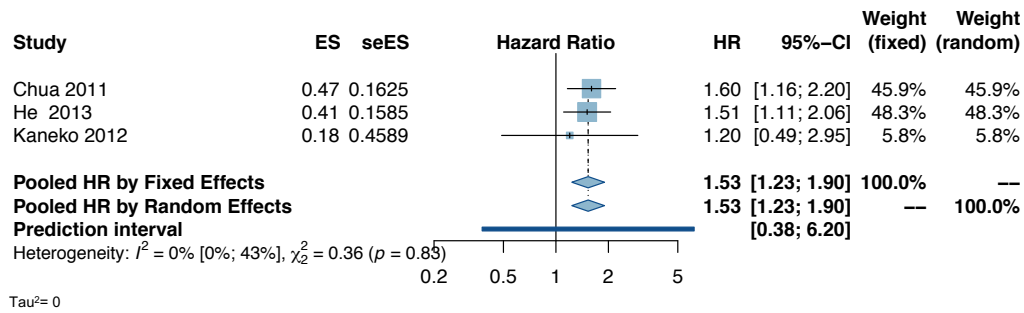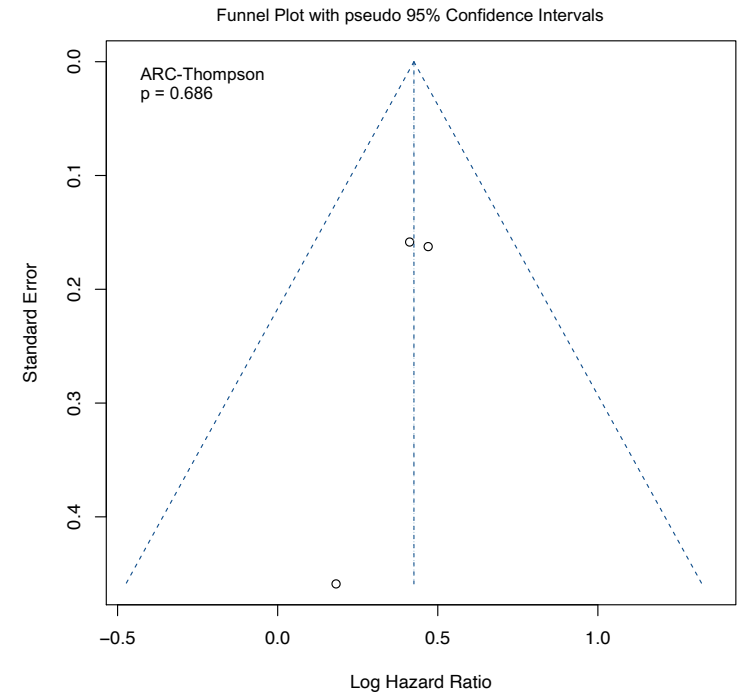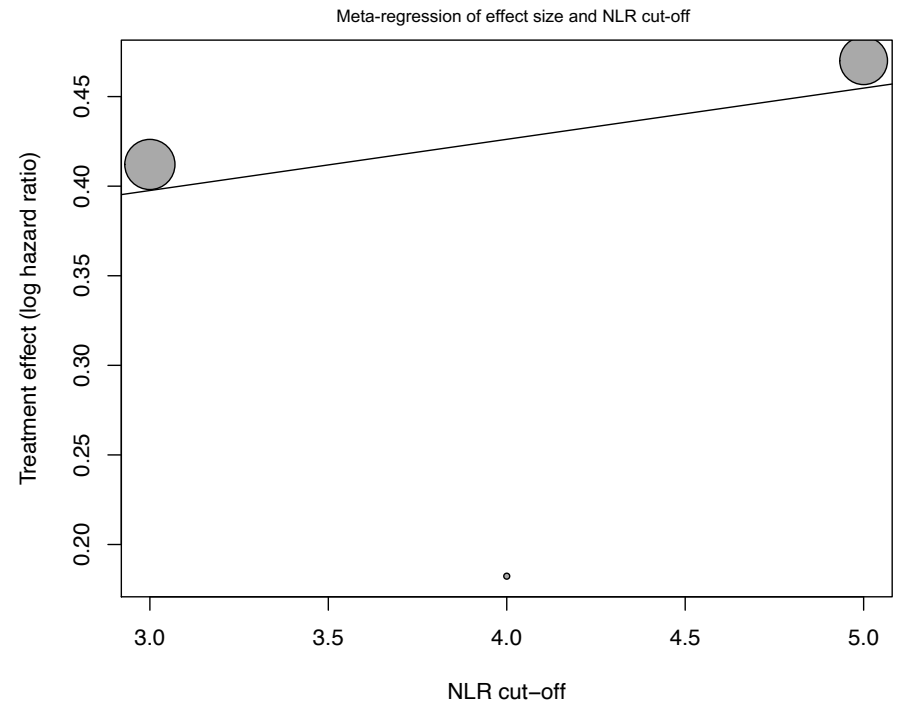



Supplementary Figure 28 - NLR: PFS in colorectal cancer

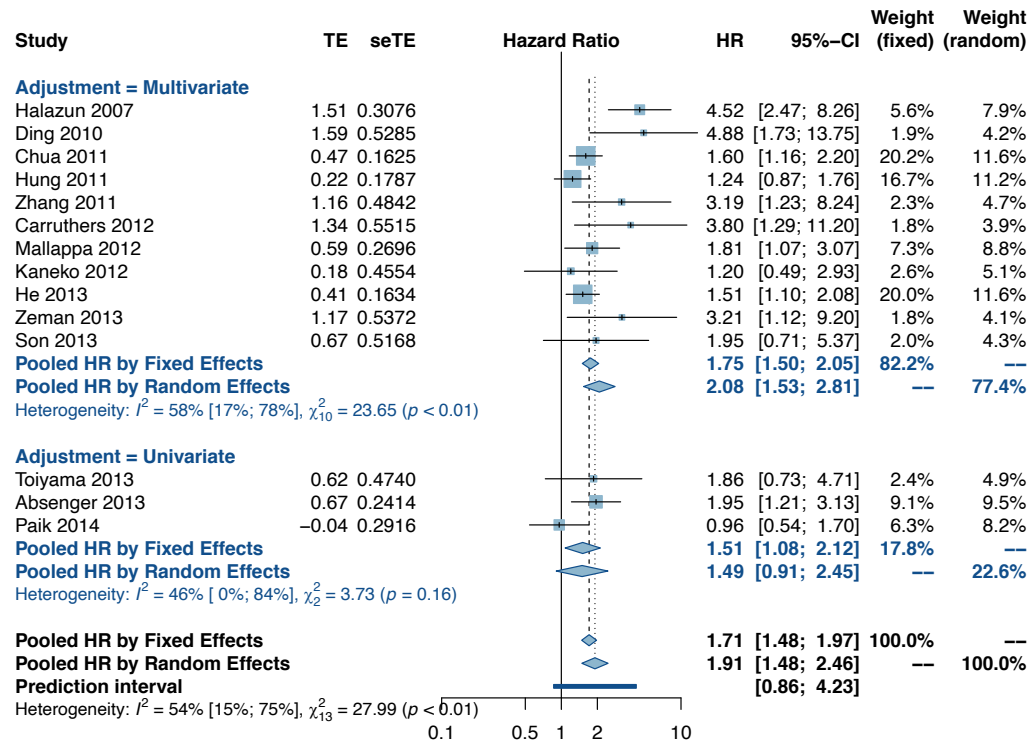

Tau<sup>2</sup> = 0.341

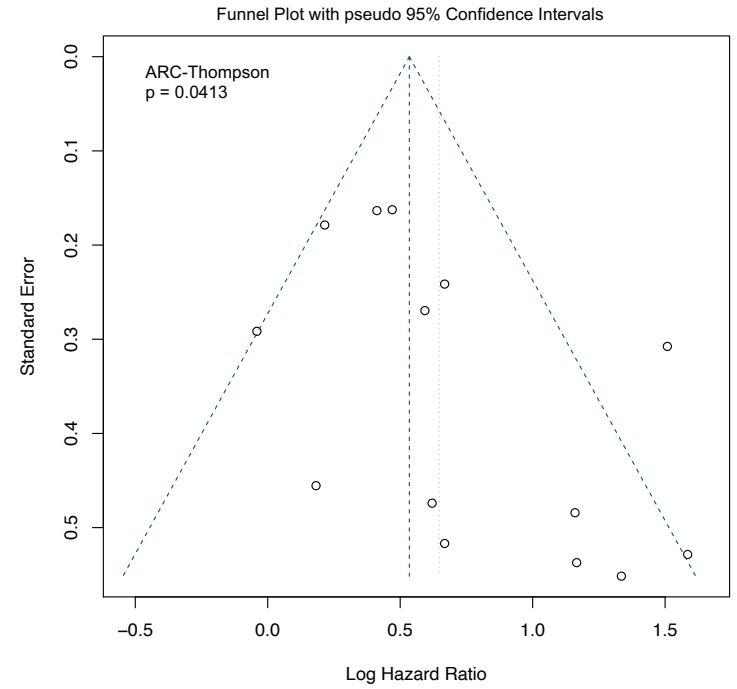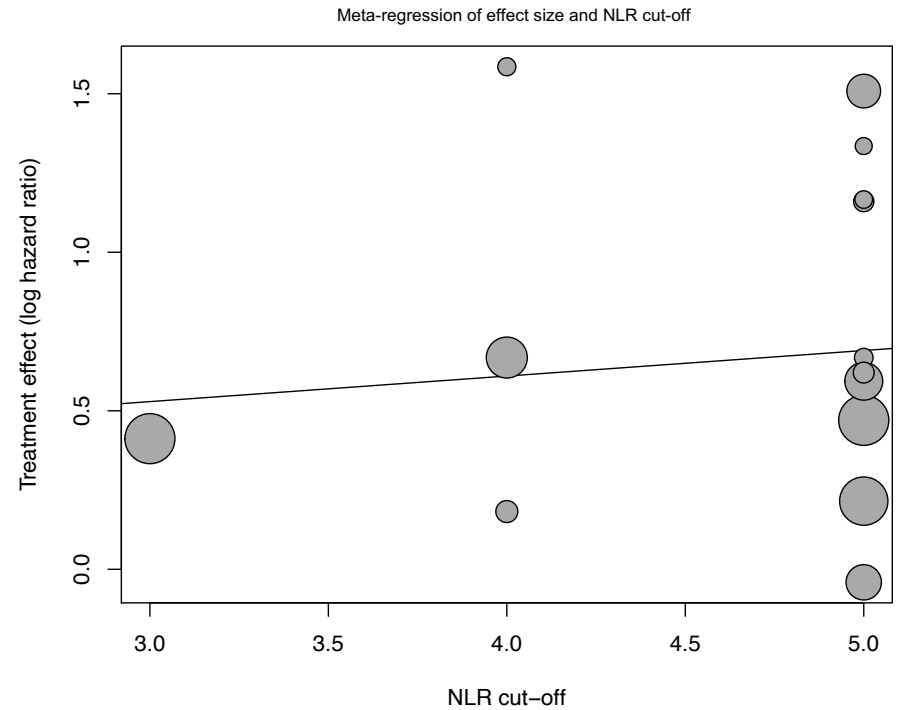

### Supplementary Figure 29- NLR: DFS in colorectal cancer

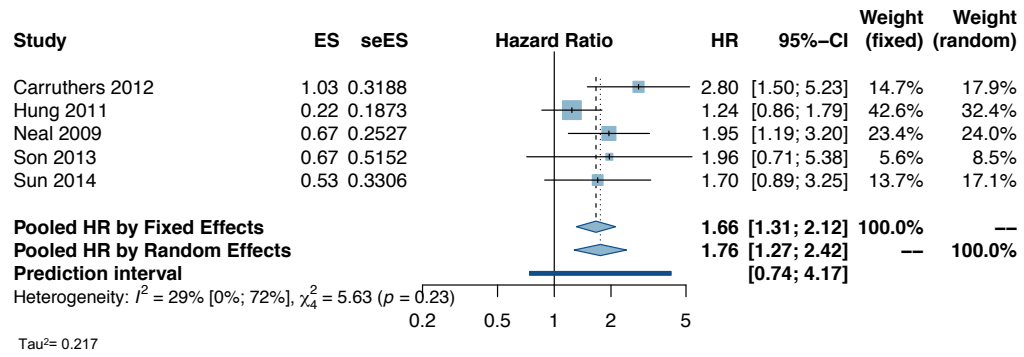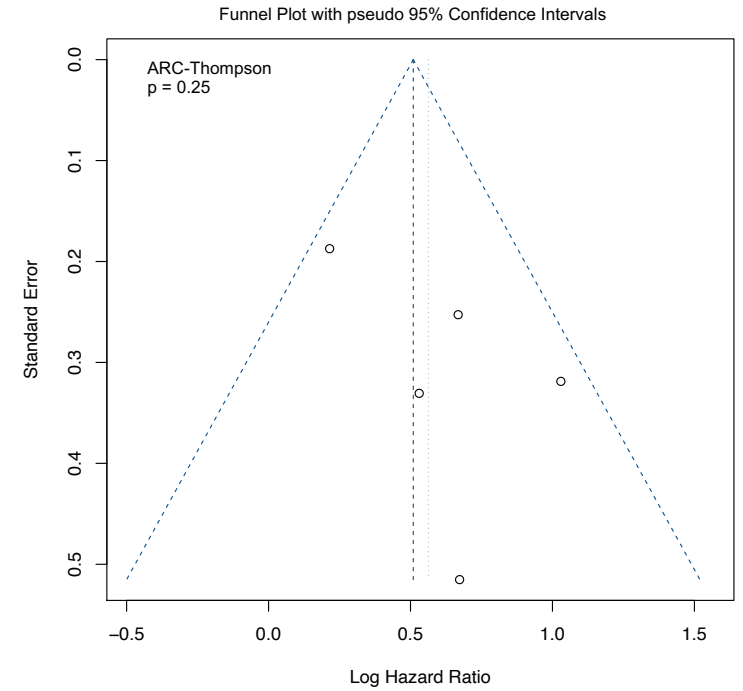

Supplementary Figure 30 - NLR: OS in rectal cancer

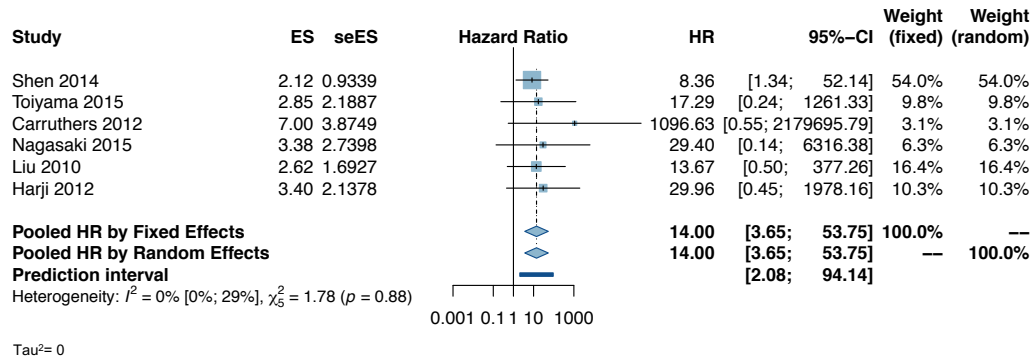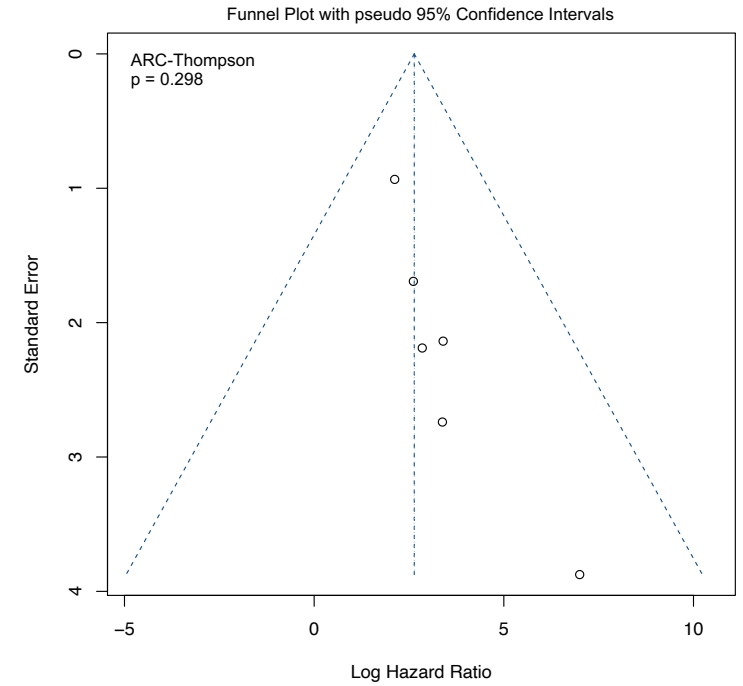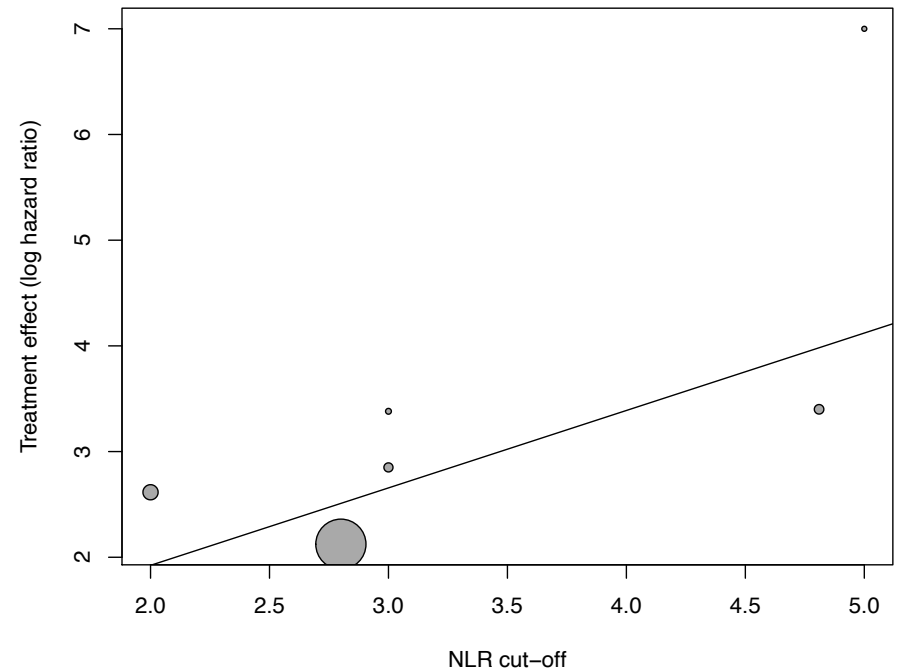

### Supplementary Figure 31 - NLR: DFS in rectal cancer

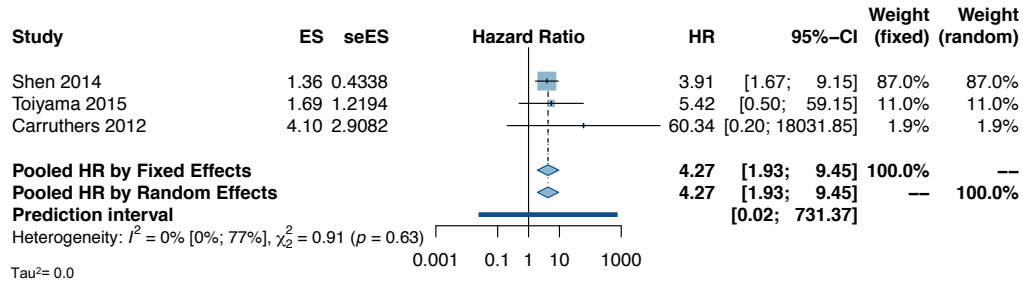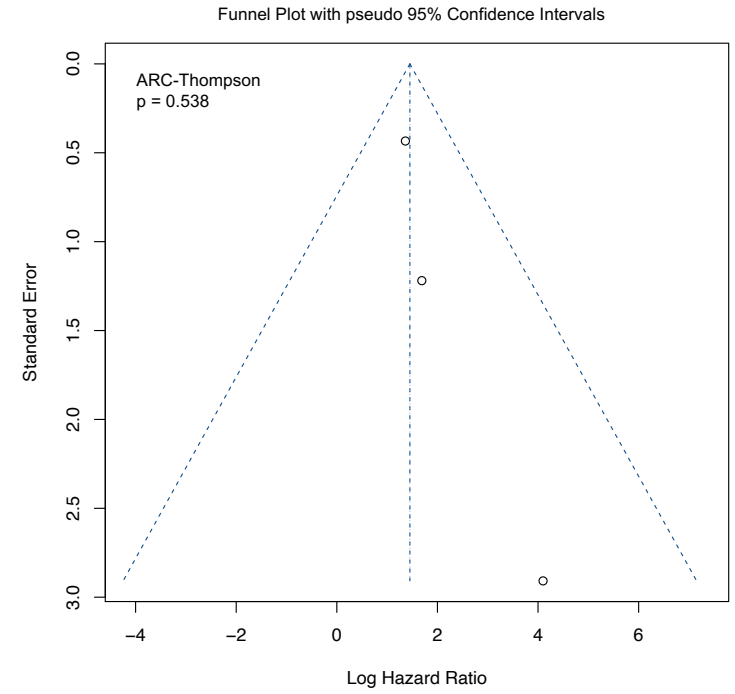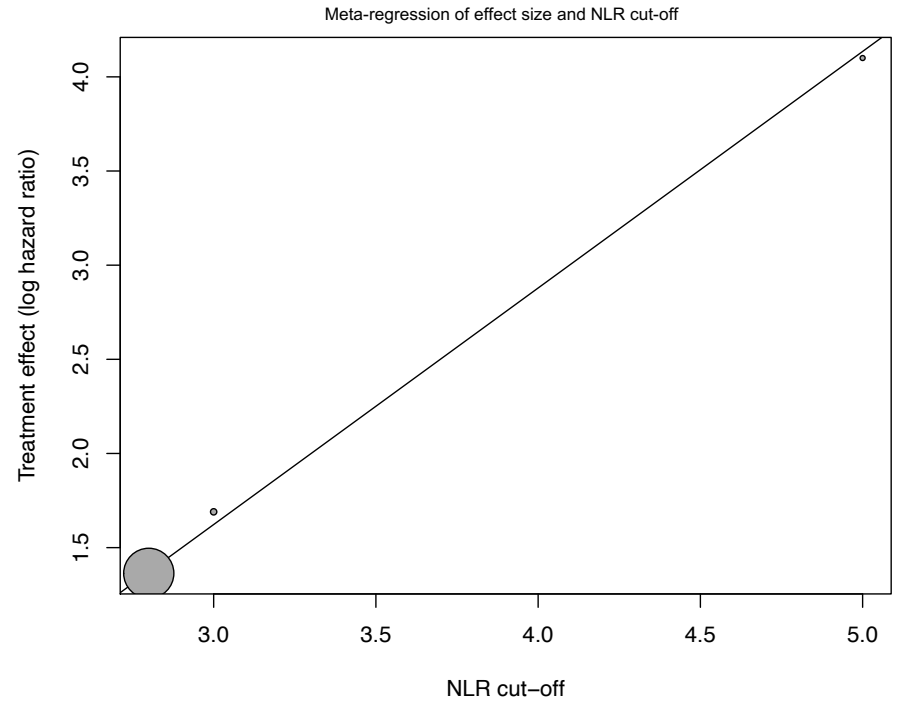

Supplementary Figure 32 - NLR: RFS in rectal cancer

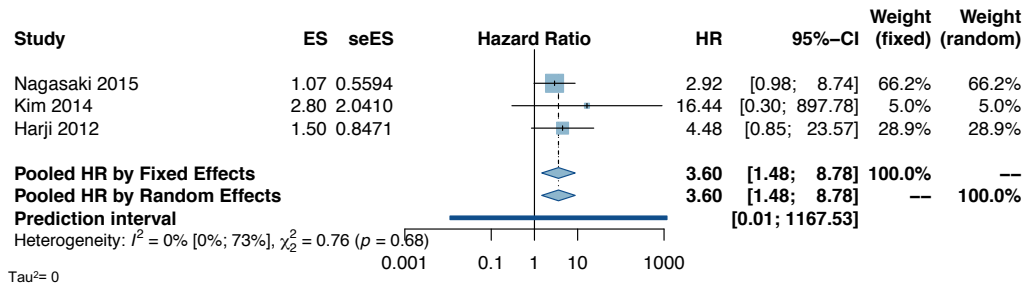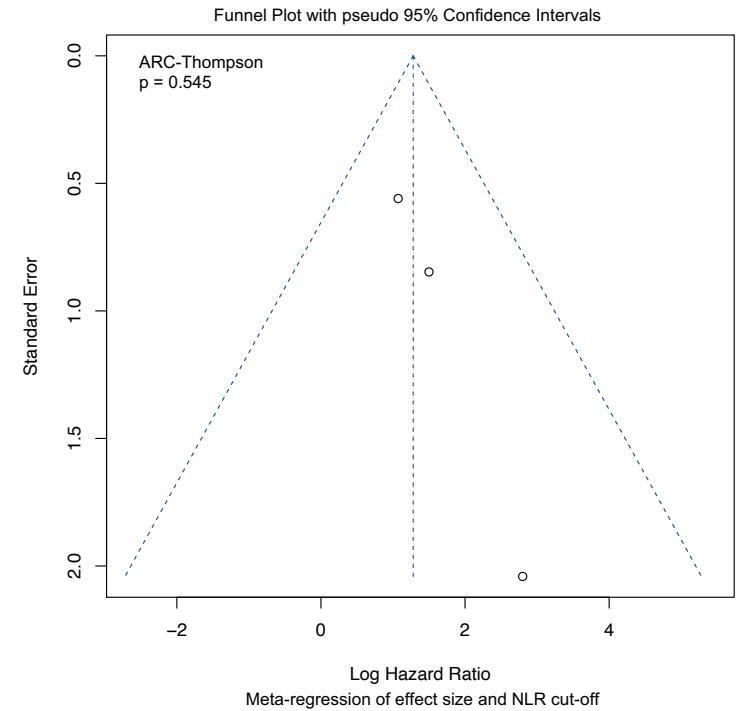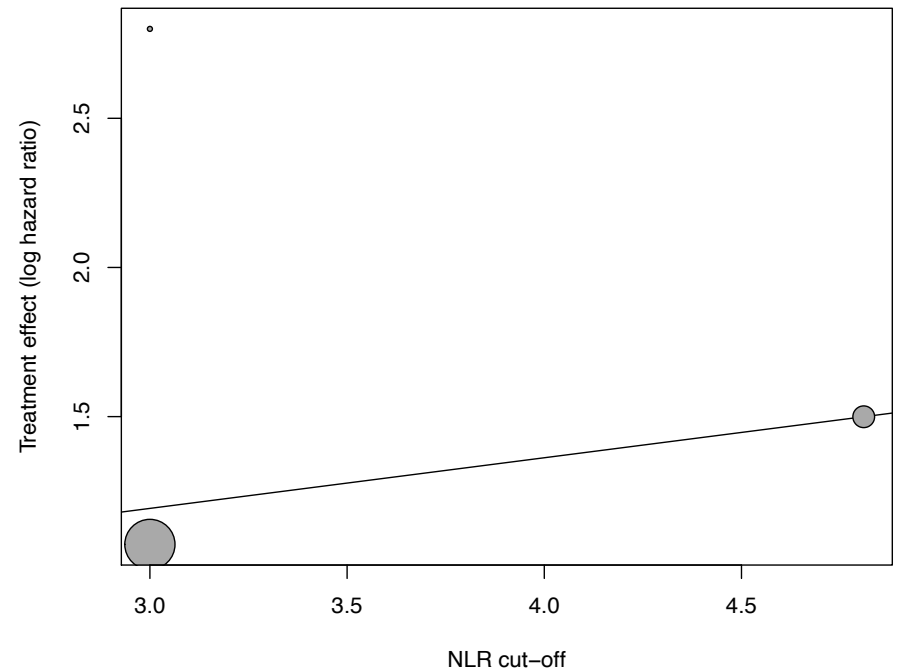

Supplementary Figure 33 - NLR: OS in colorectal liver metastasis

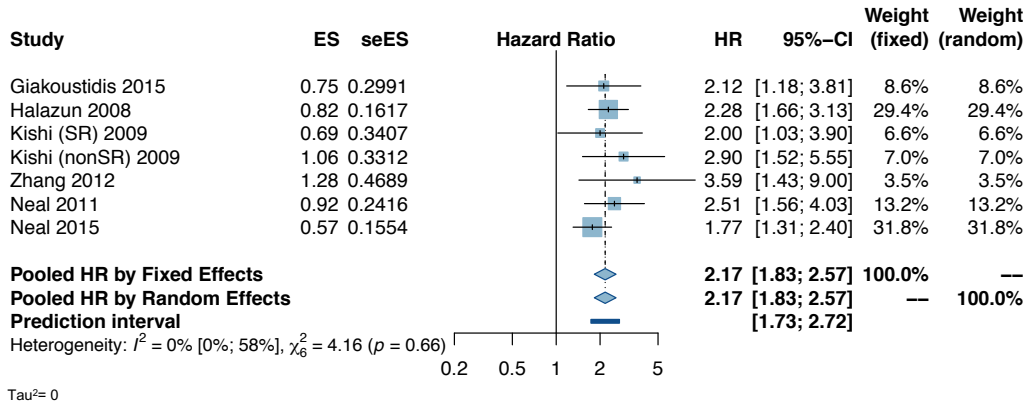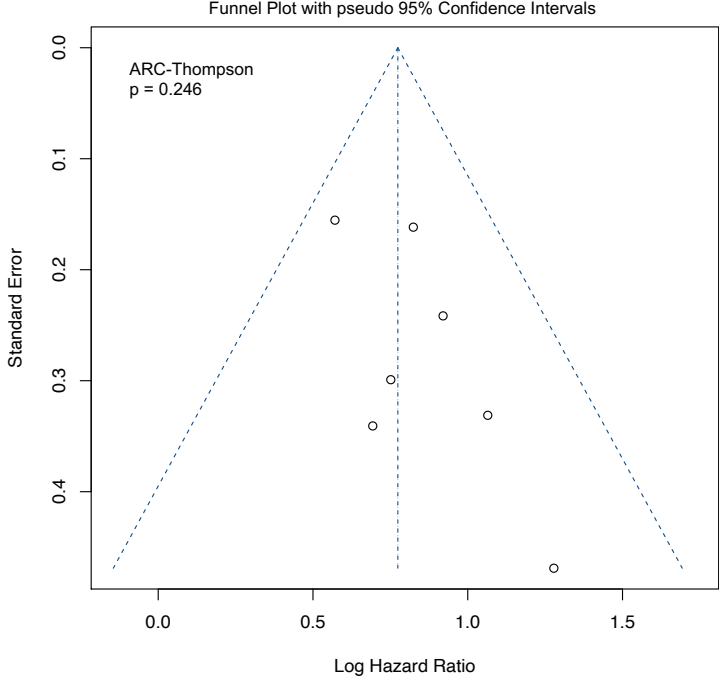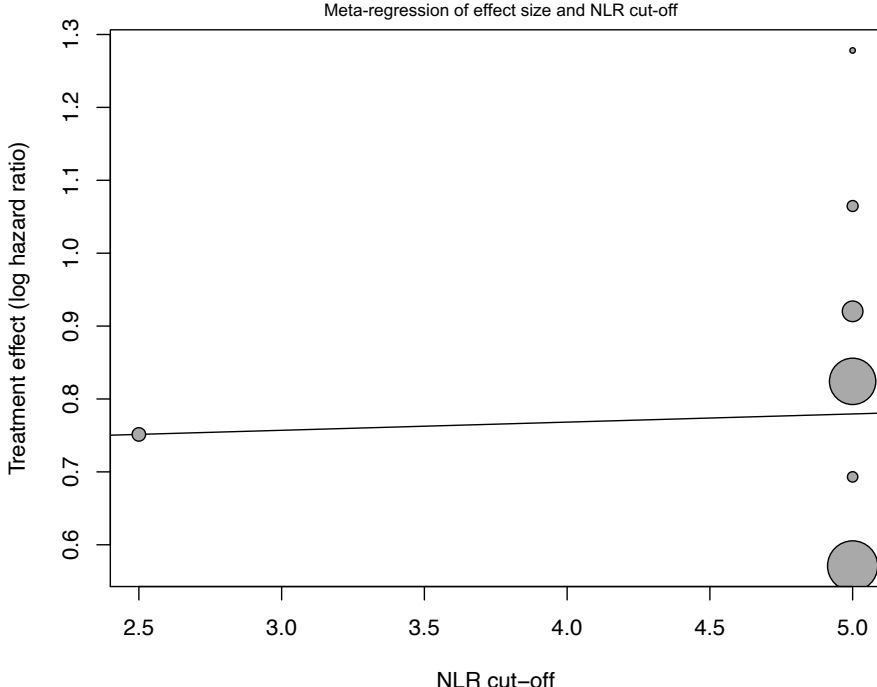

Supplementary Figure 34 - NLR: OS in colorectal liver metastasis with surgical resection

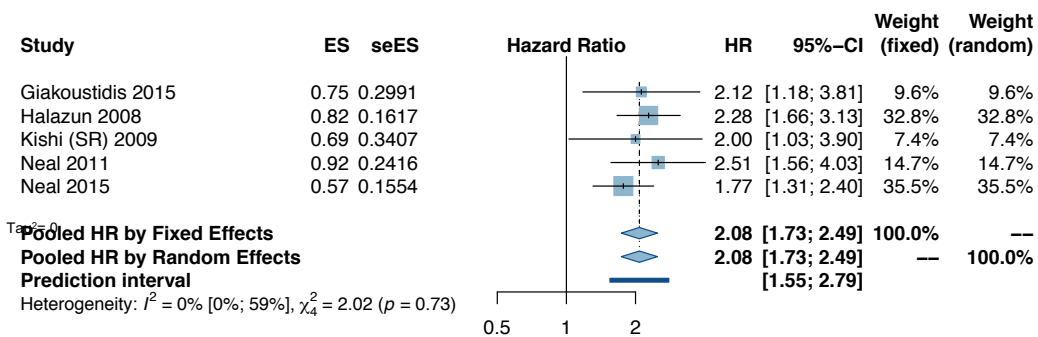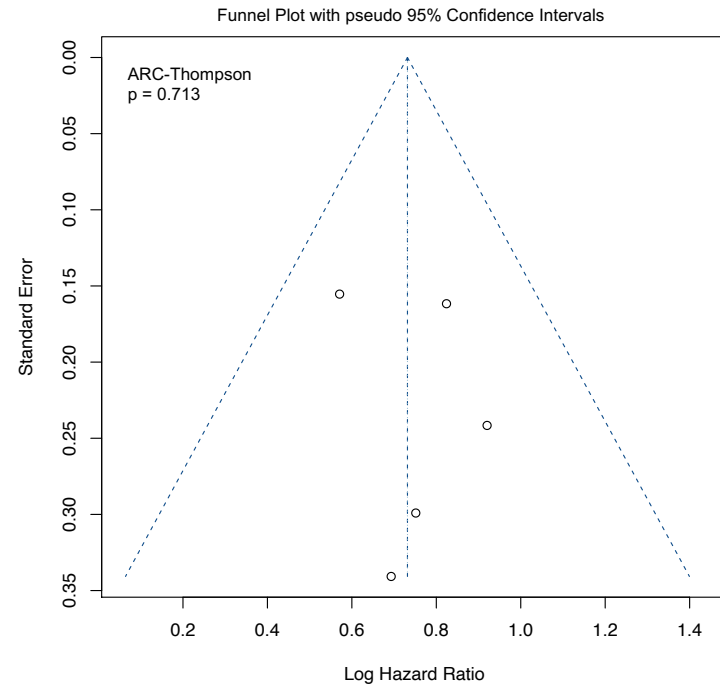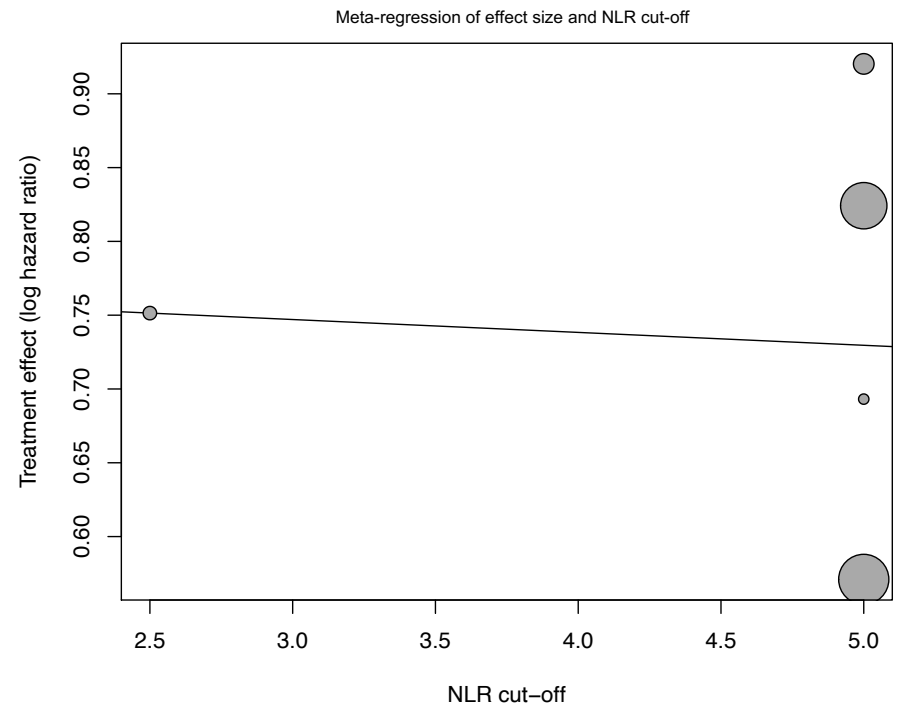

Supplementary Figure 35 - NLR: OS in colorectal liver metastasis with non-surgical treatment

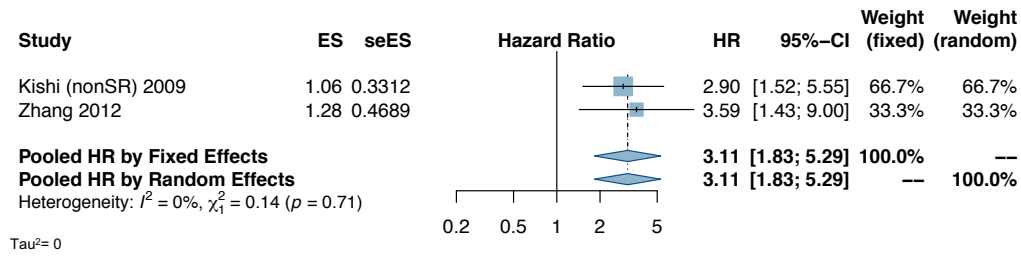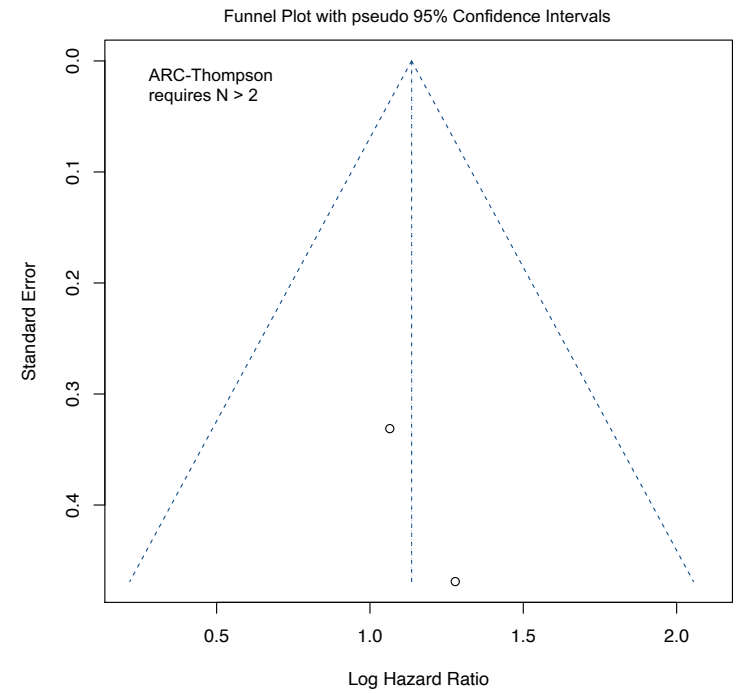



### Supplementary Figure 36 - NLR: RFS in colorectal liver metastasis

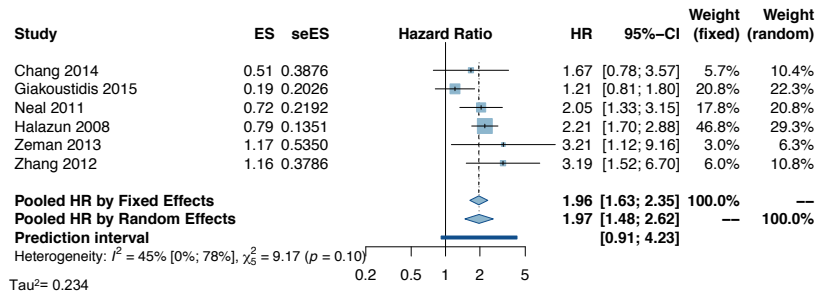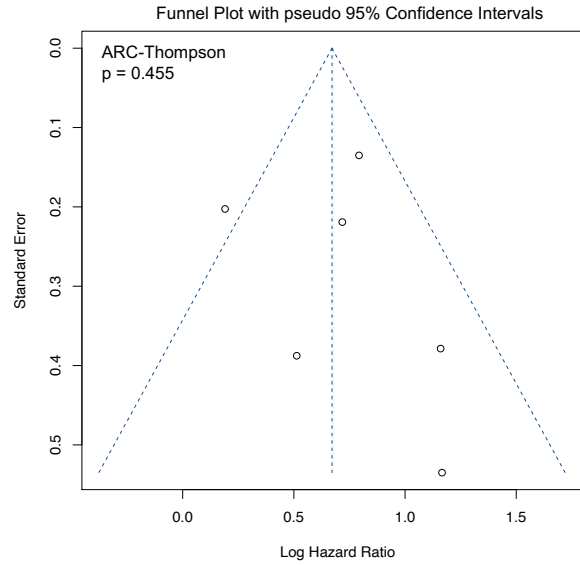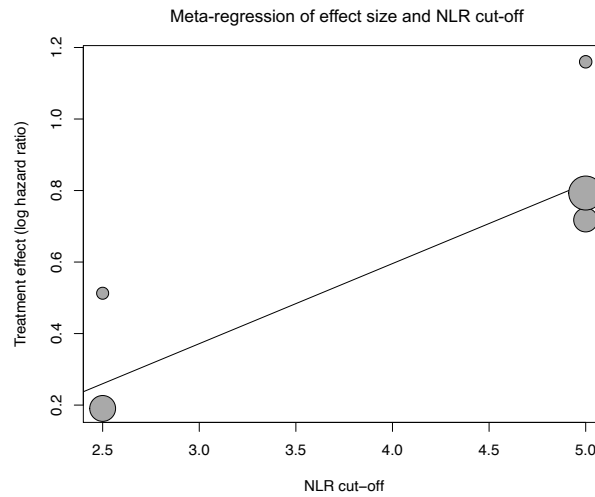

Supplementary Figure 37 - NLR: RFS in colorectal liver metastasis with surgical resection

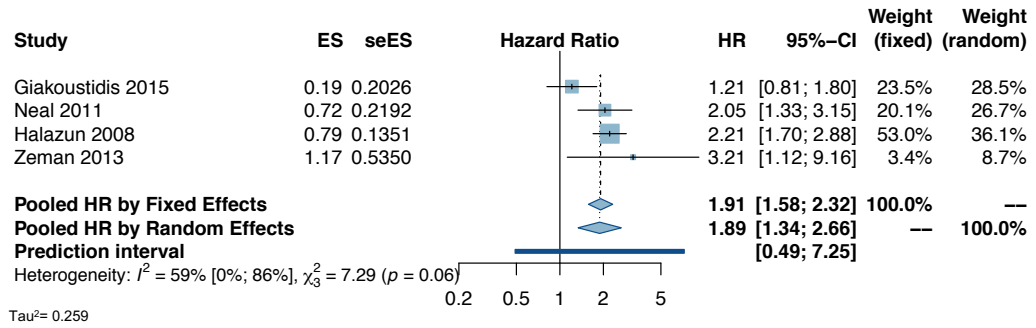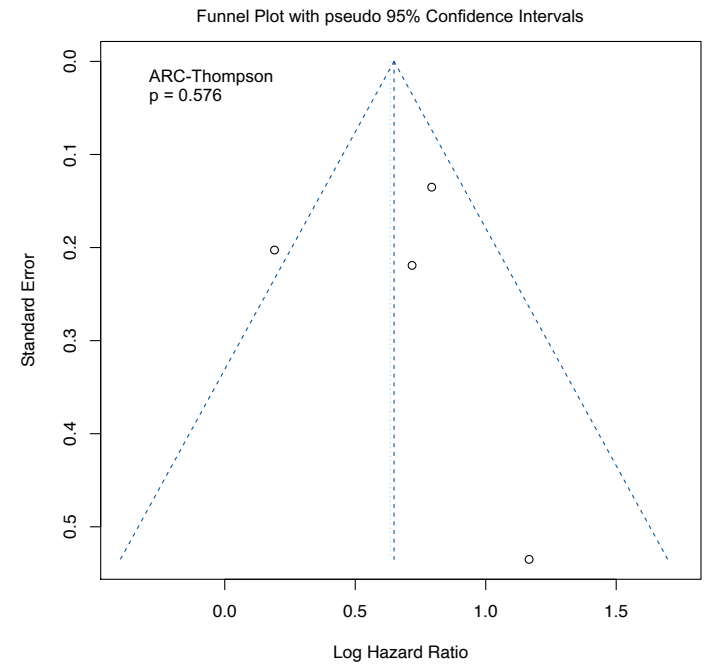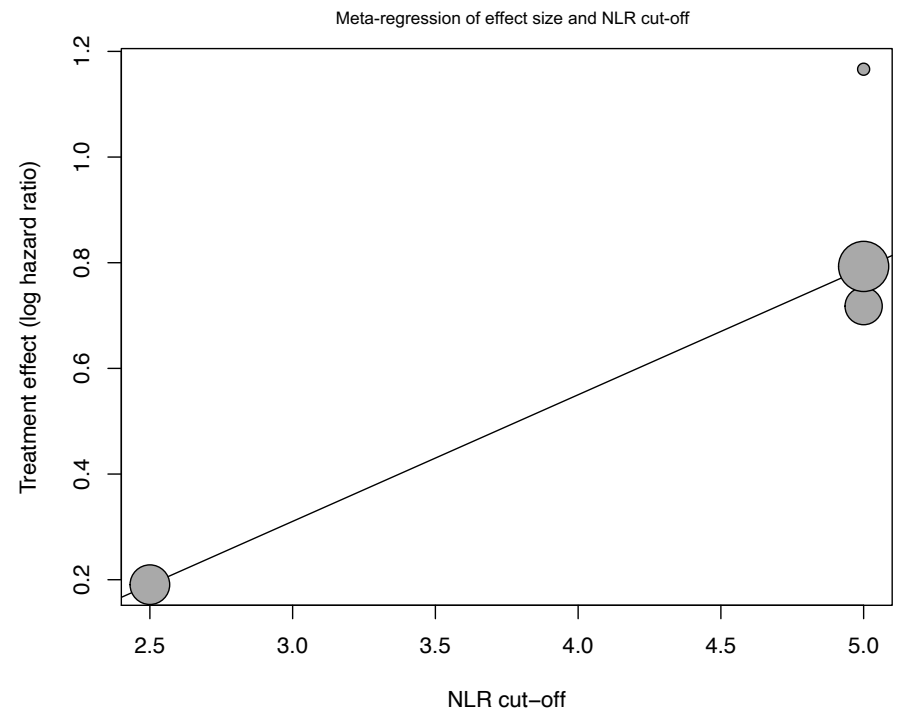

Supplementary Figure 38 - NLR: RFS in colorectal liver metastasis with non-surgical treatment

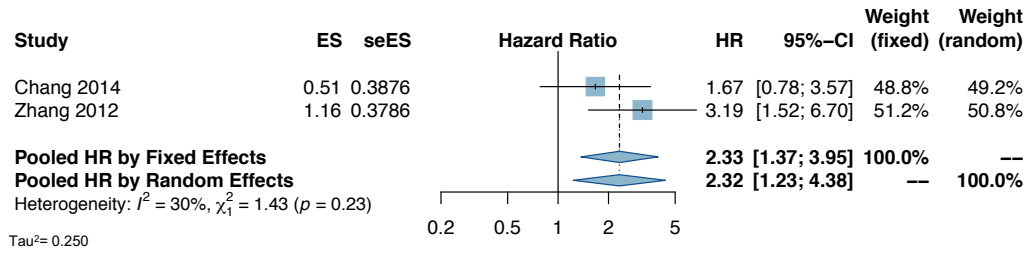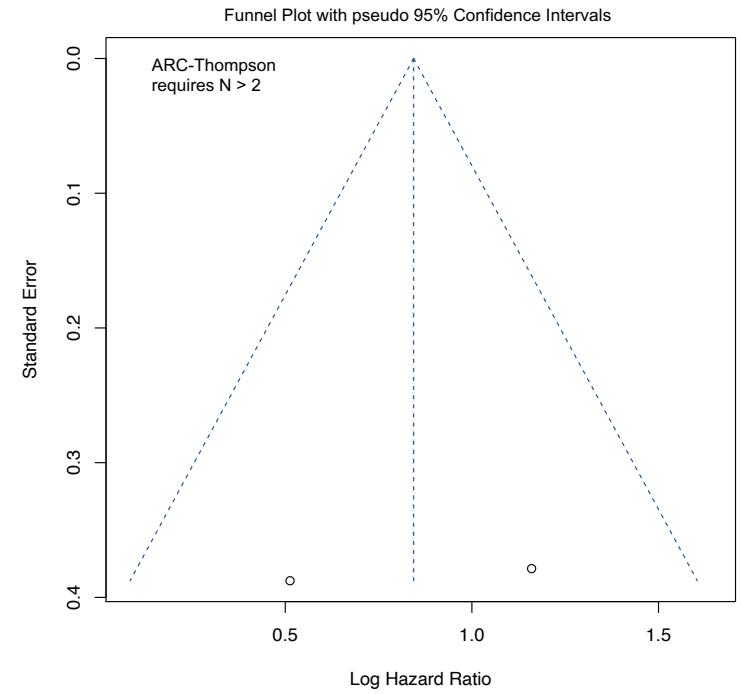

### Supplementary Figure 39 - NLR: OS in pancreatic cancer

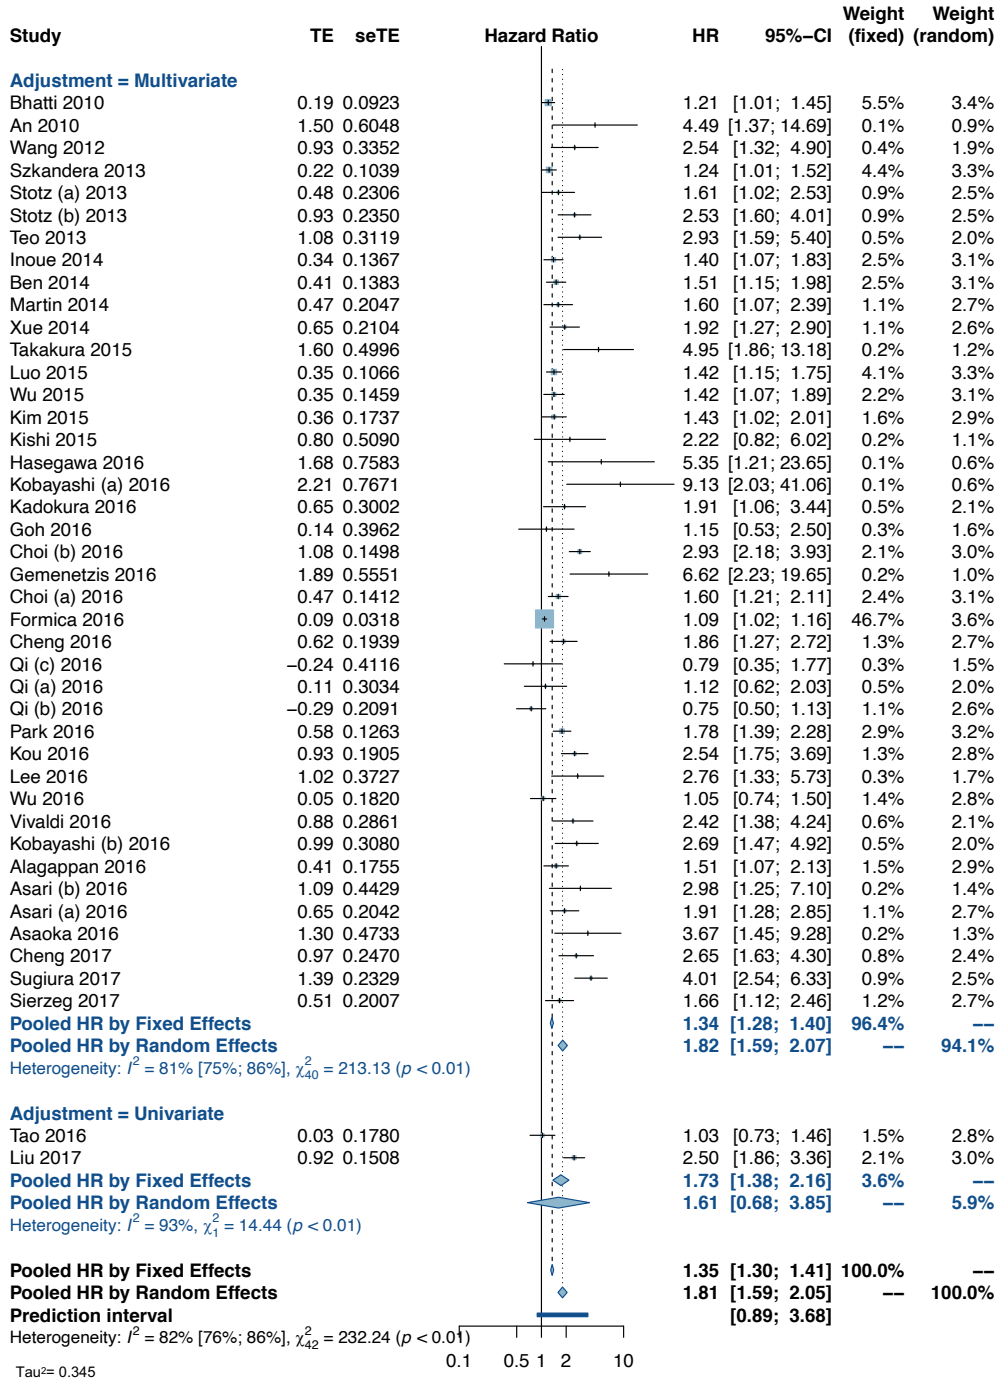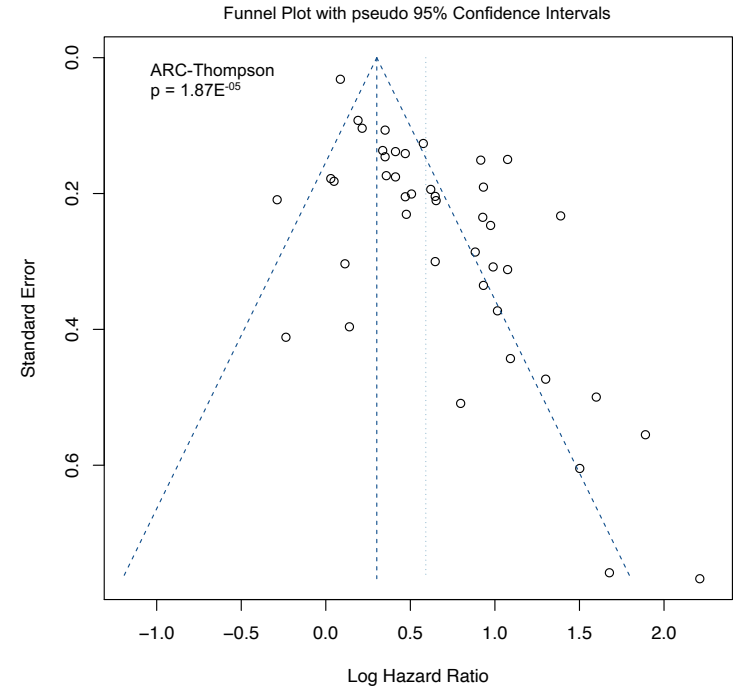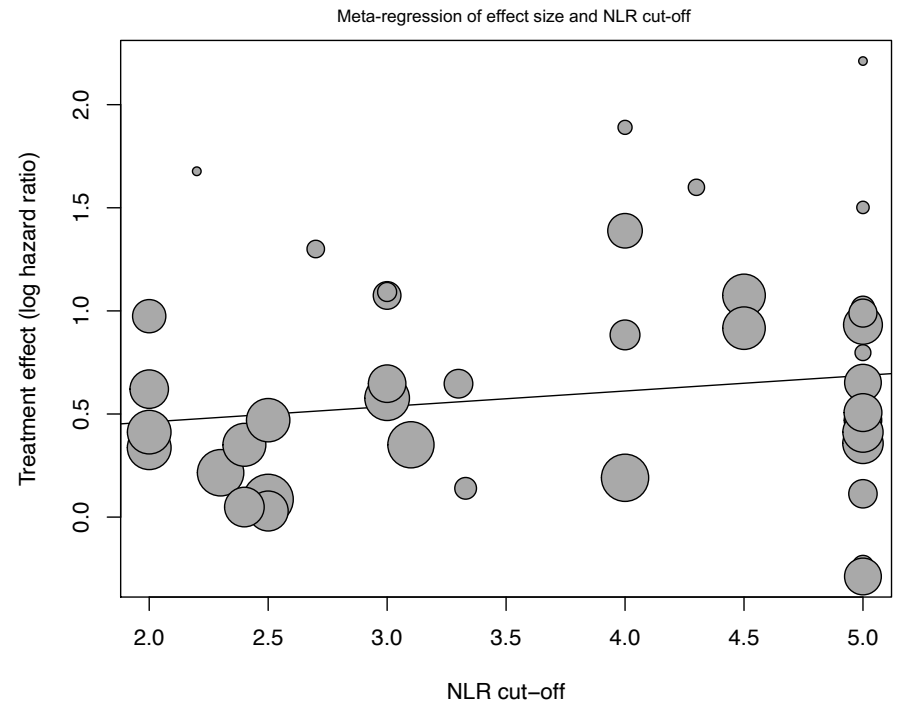

Supplementary Figure 40 - NLR: OS in pancreatic cancer with resection

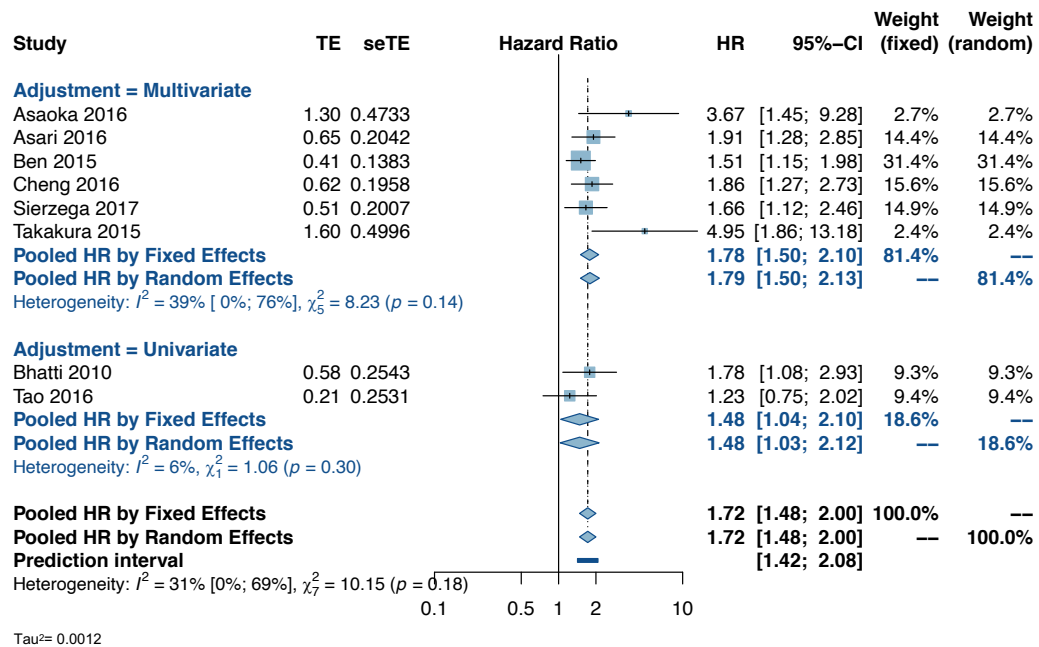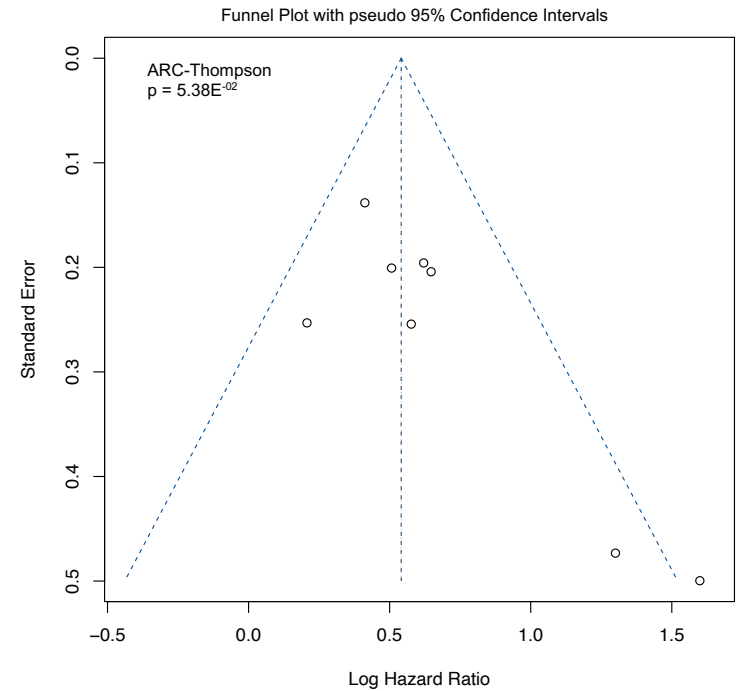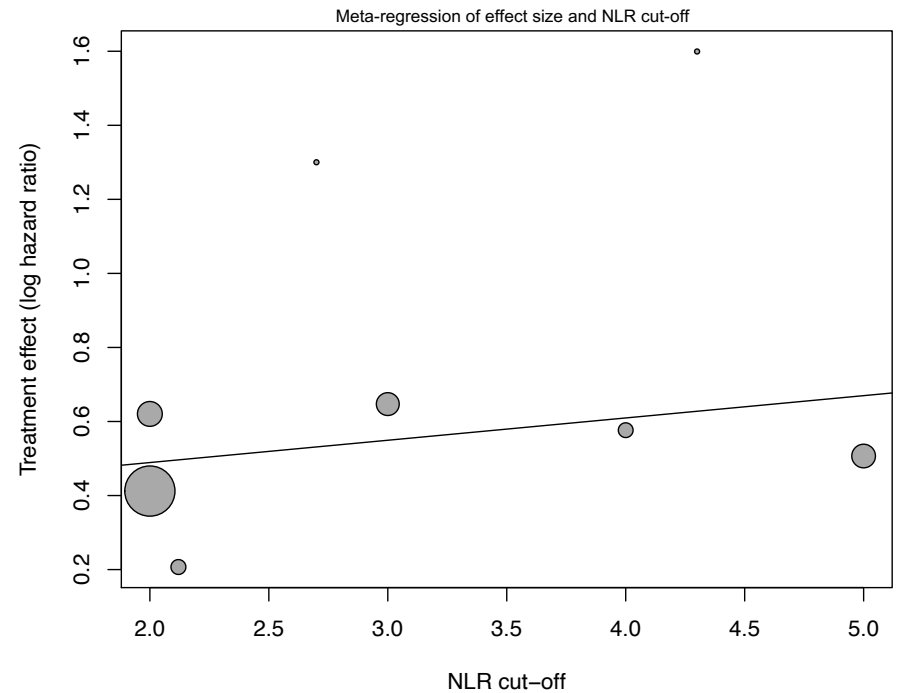

Supplementary Figure 41 - NLR: DFS in pancreatic cancer

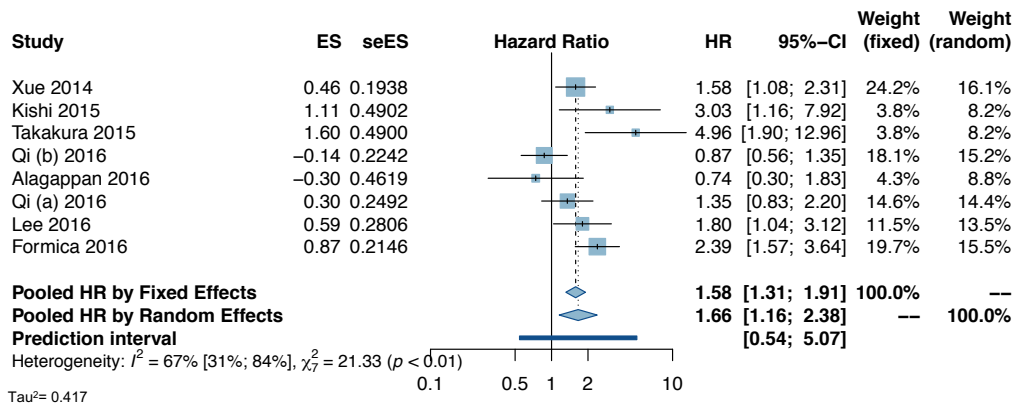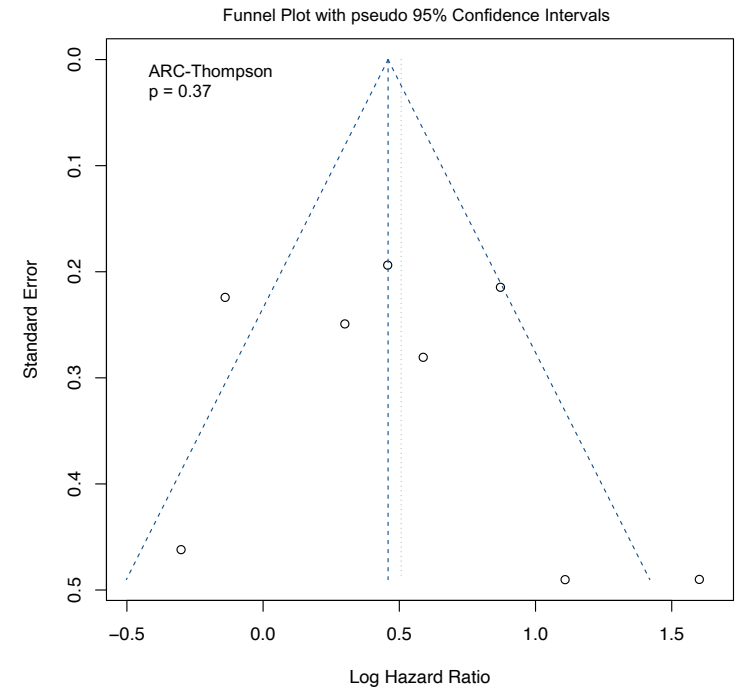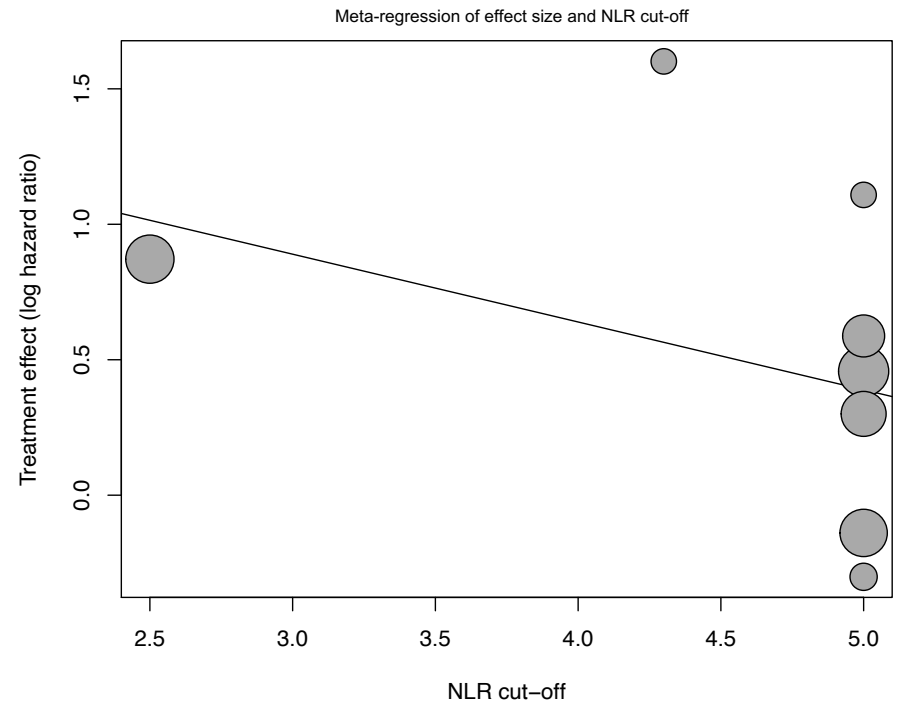

Supplementary Figure 42 - NLR: CSS in pancreatic cancer

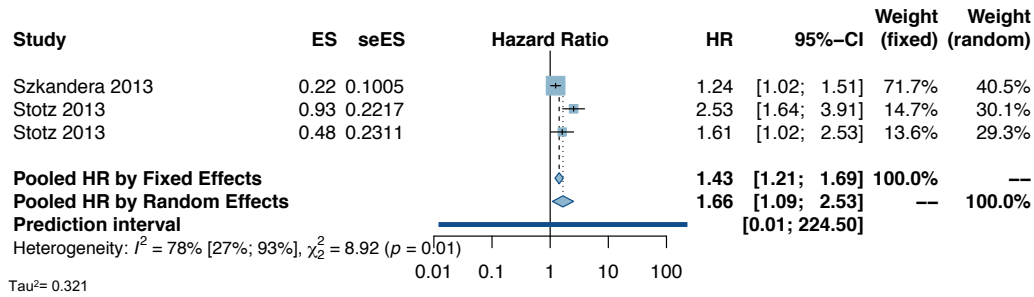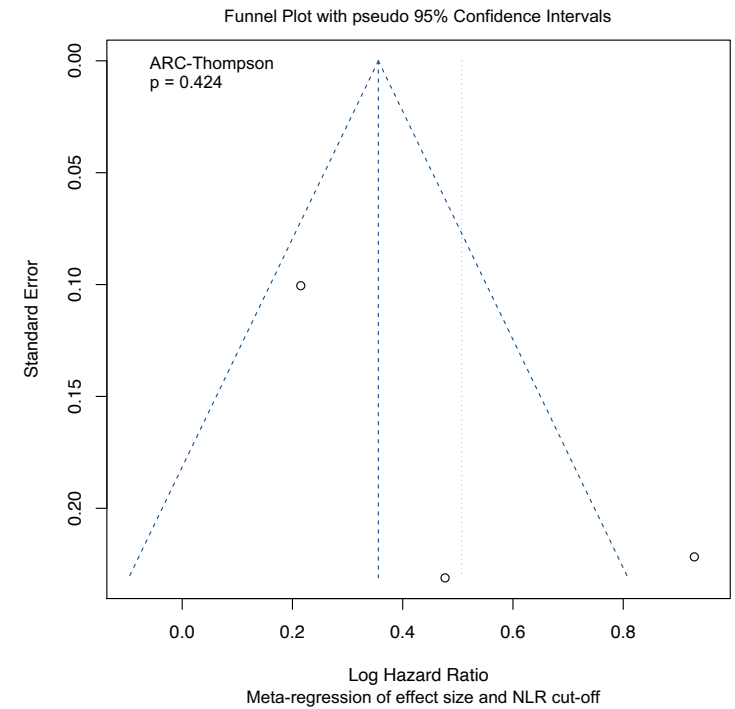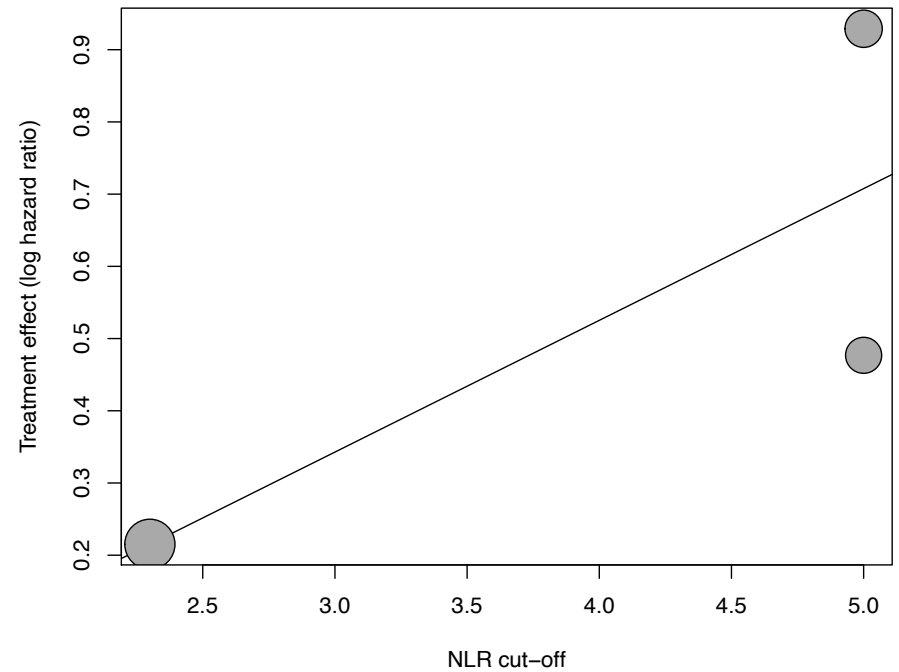

### Supplementary Figure 43 - NLR: OS in gynaecologic cancer

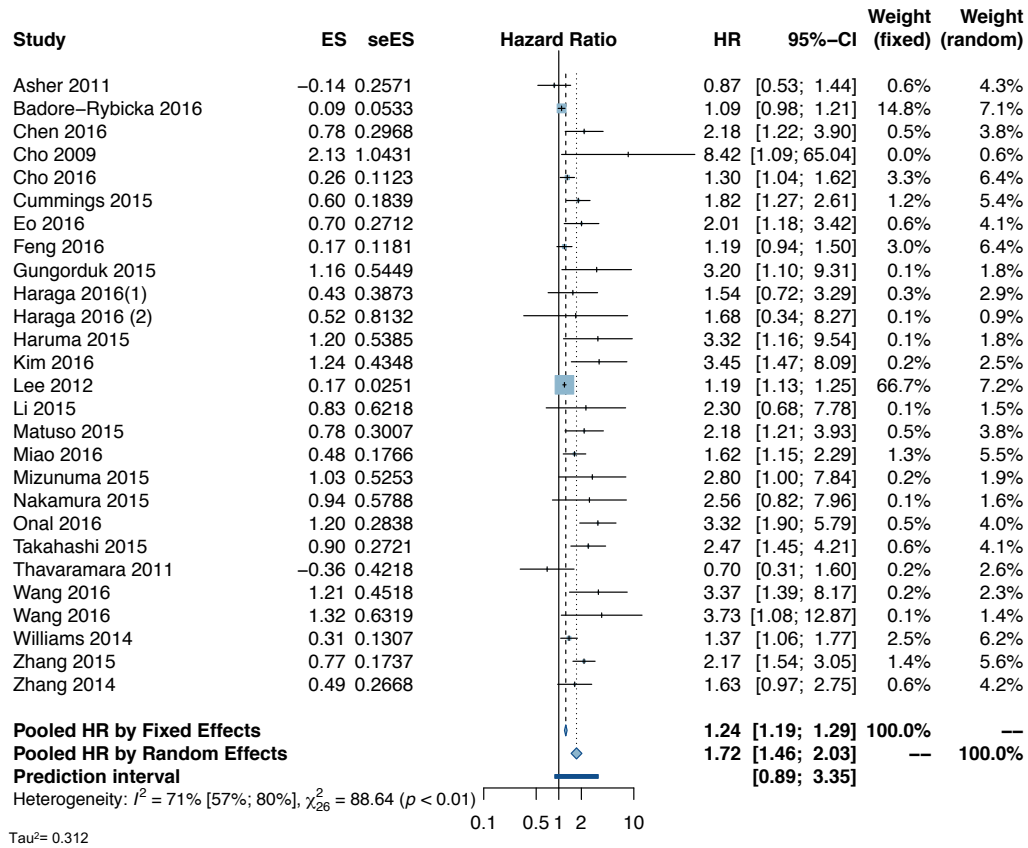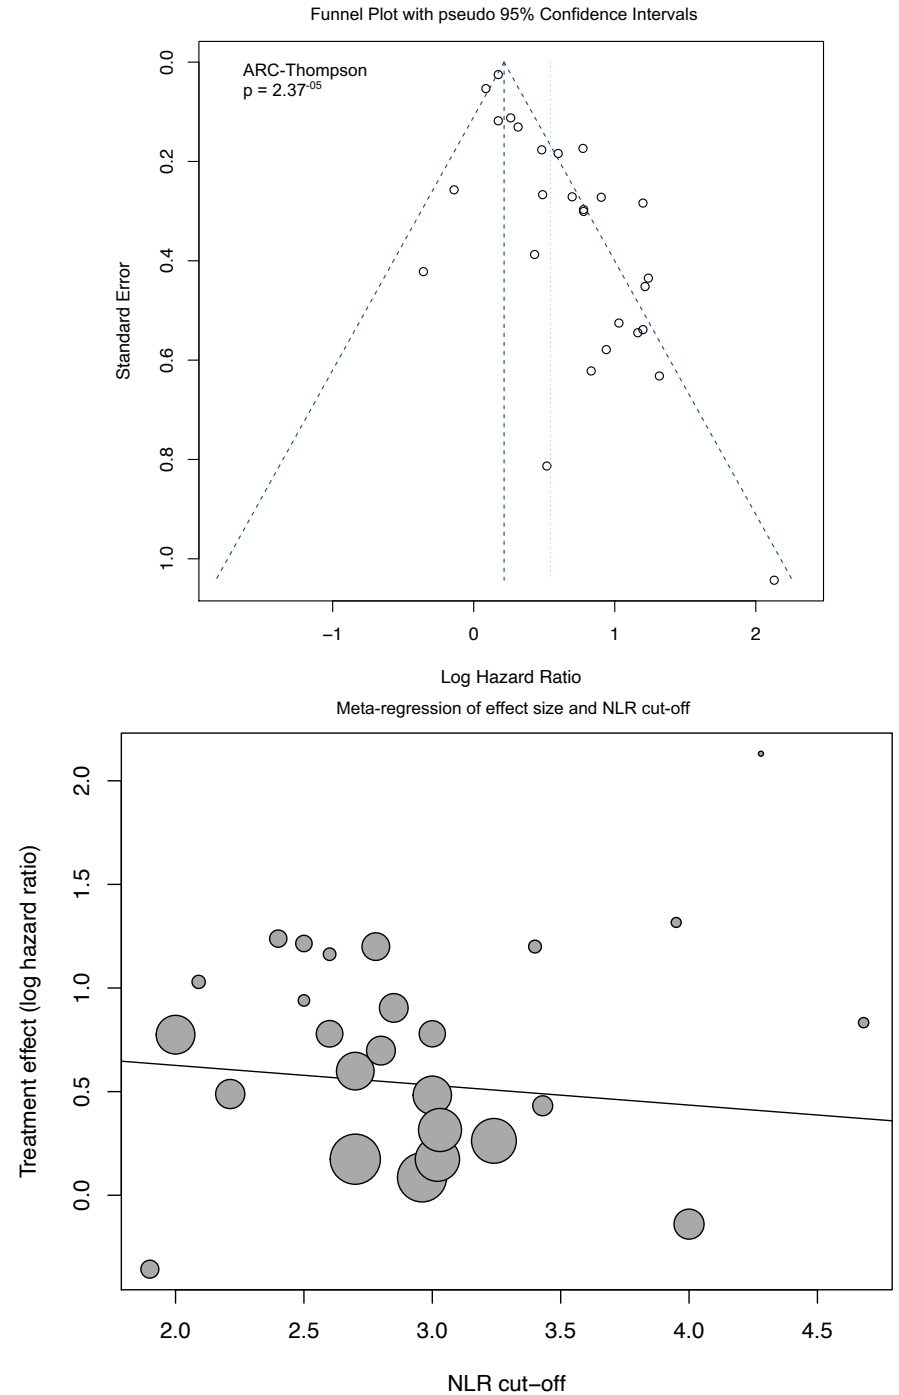



Supplementary Figure 44 - NLR: OS in cervical cancer

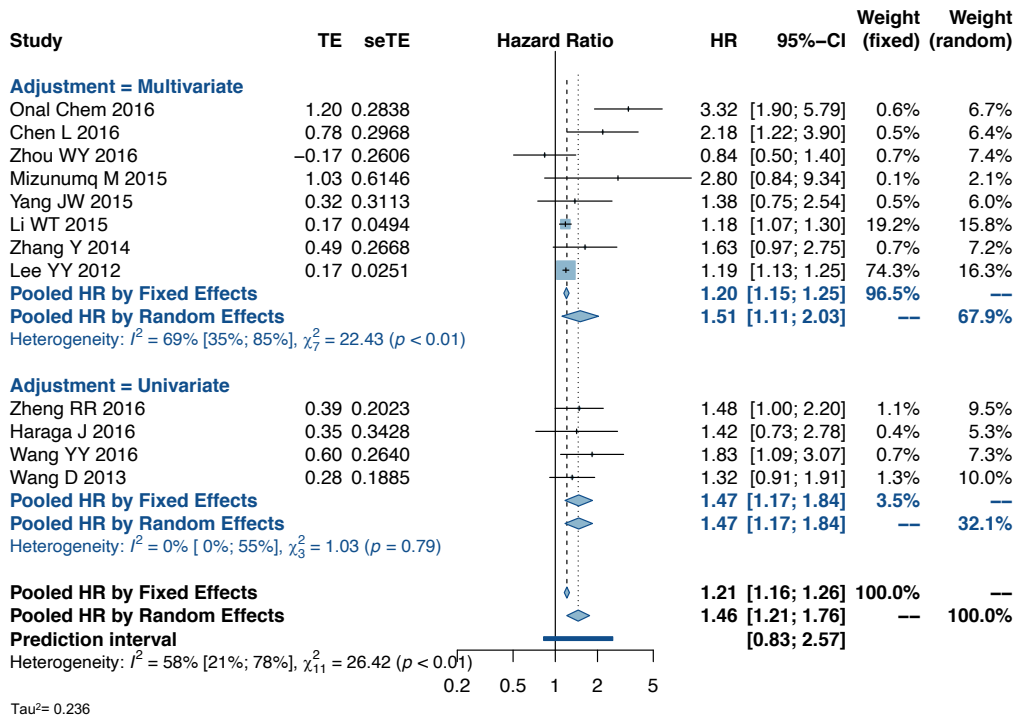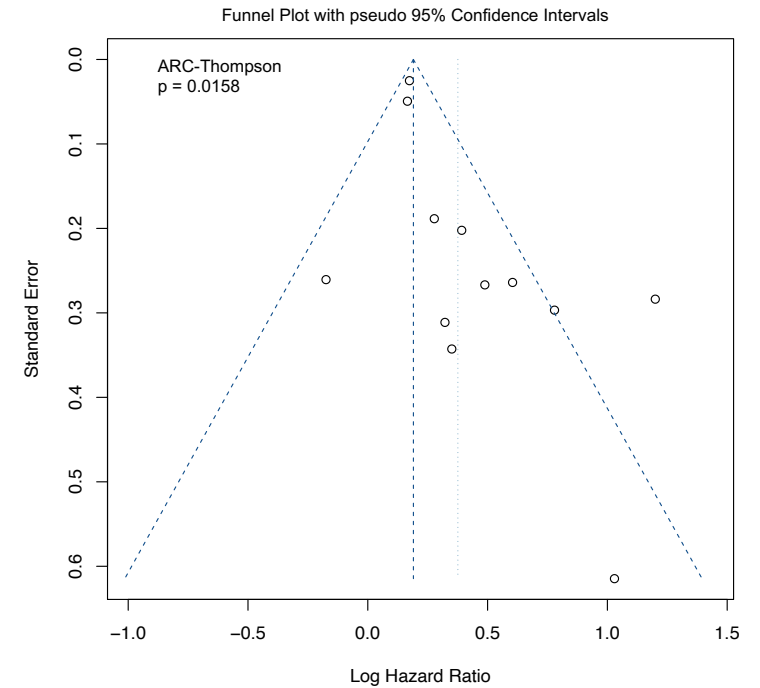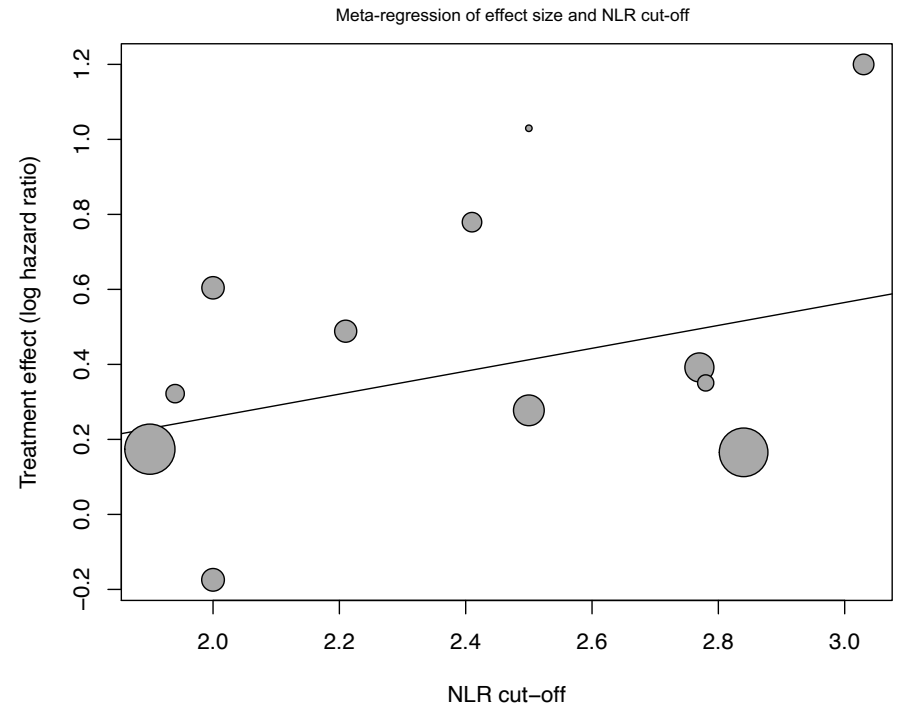

Supplementary Figure 45 - NLR: PFS in cervical cancer

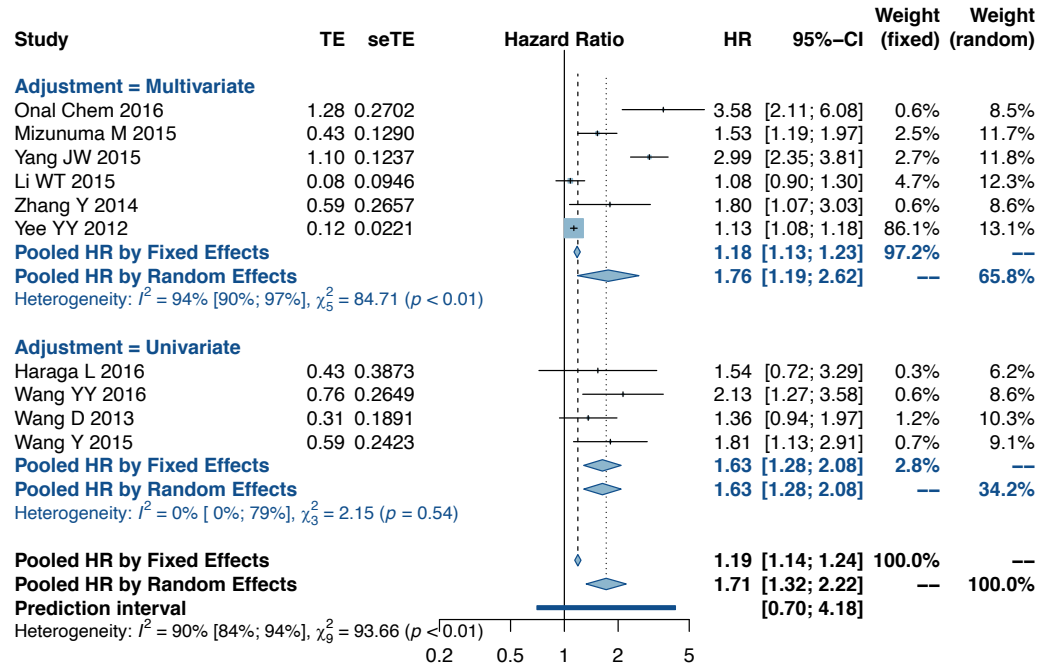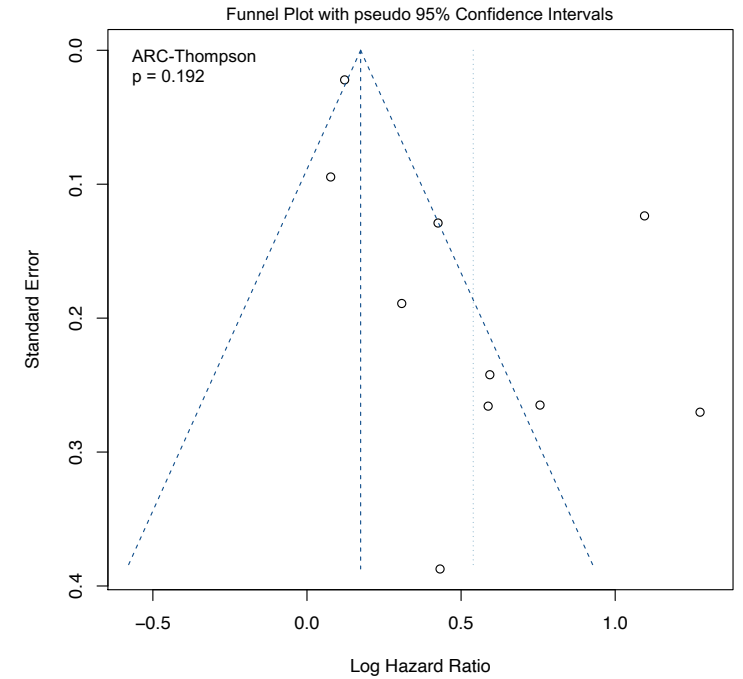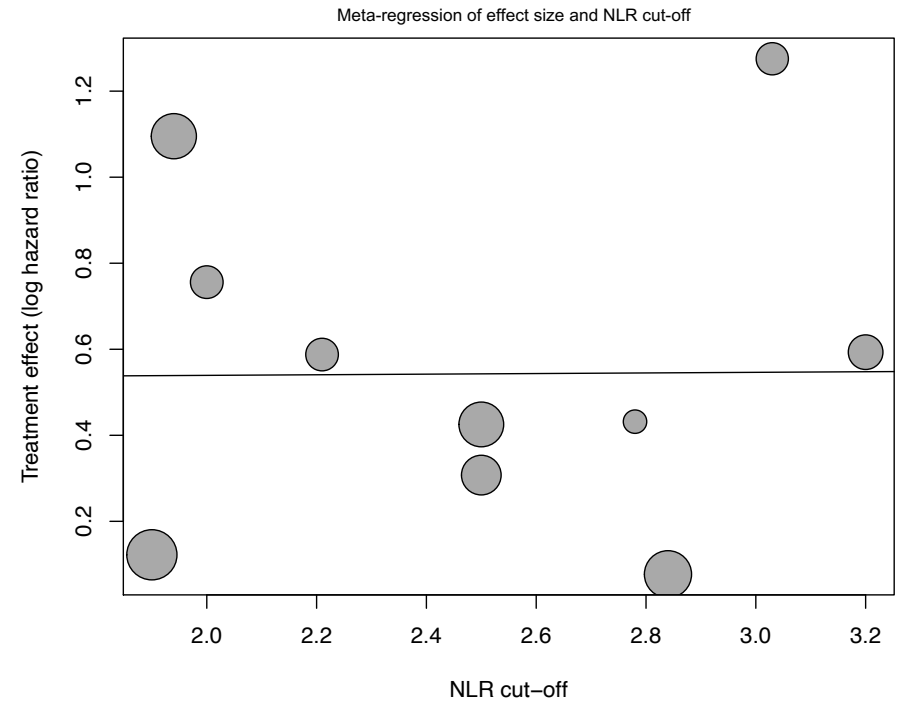

Supplementary Figure 46 - NLR: PFS in ovarian cancer

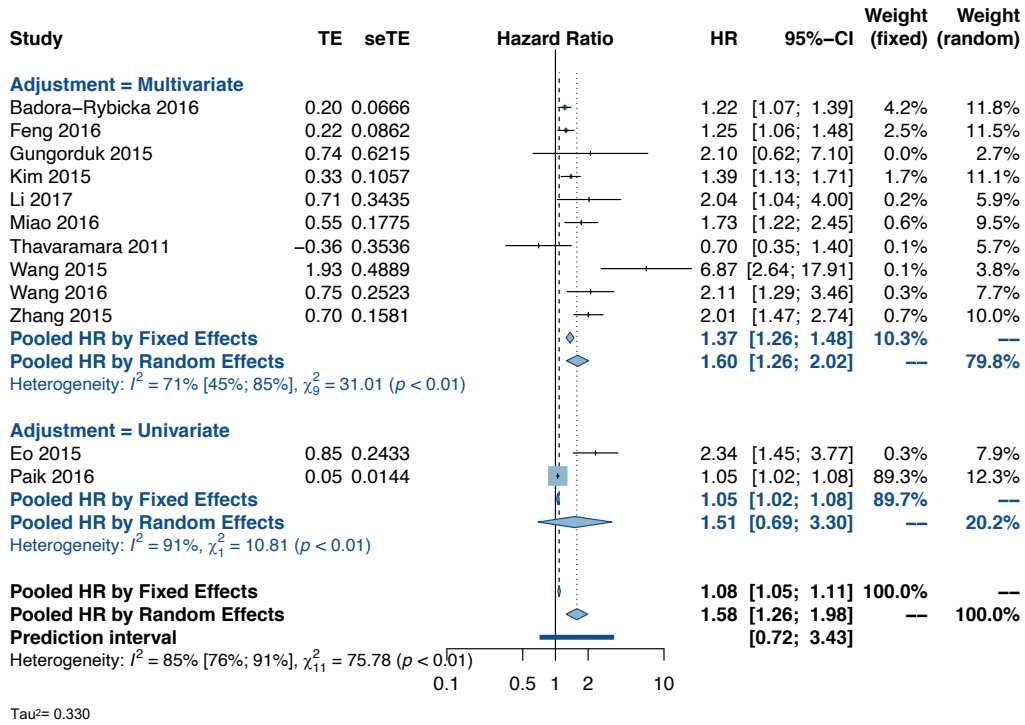

Tau<sup>2</sup> = 0.330

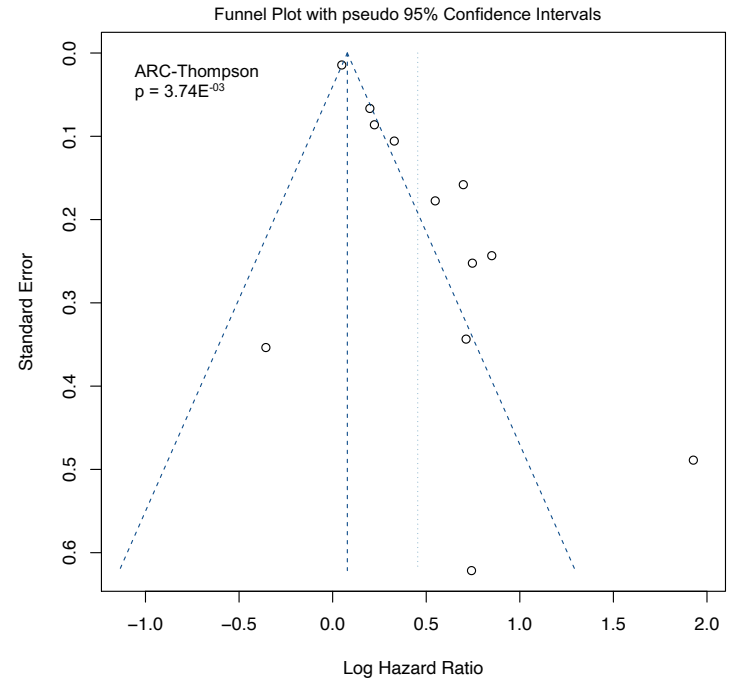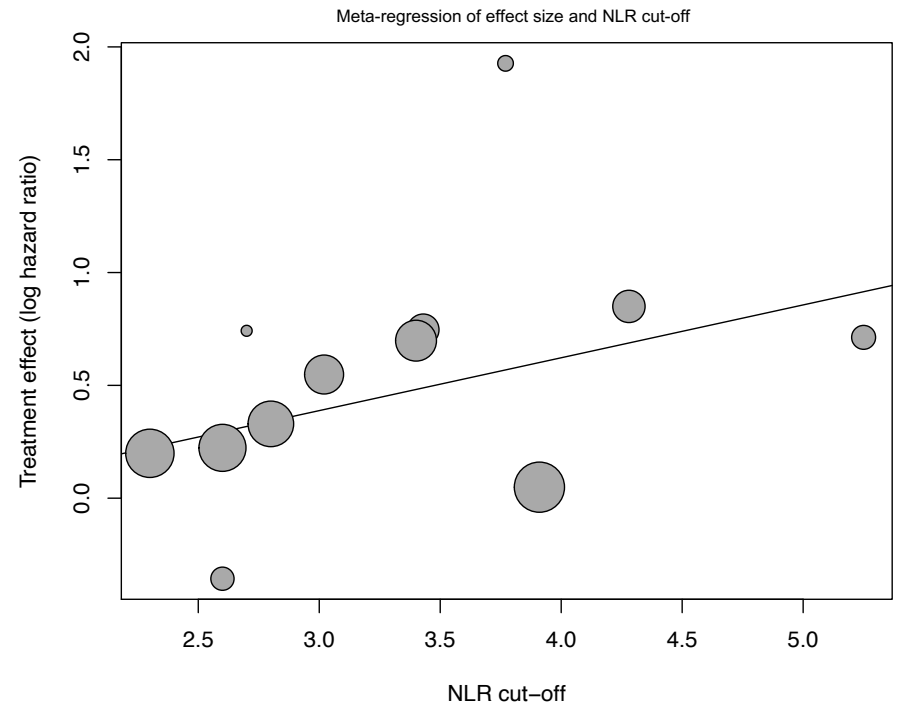

### Supplementary Figure 47 - NLR: OS in breast cancer

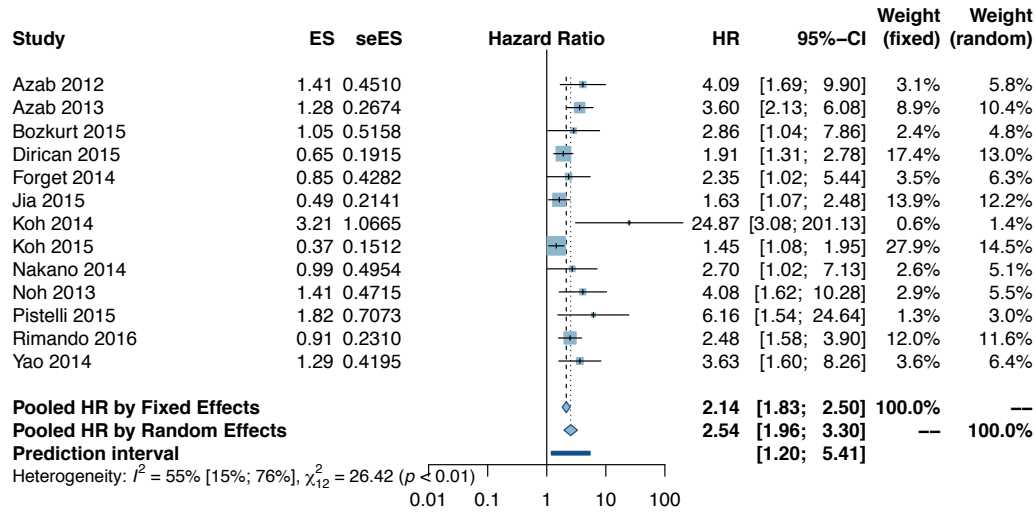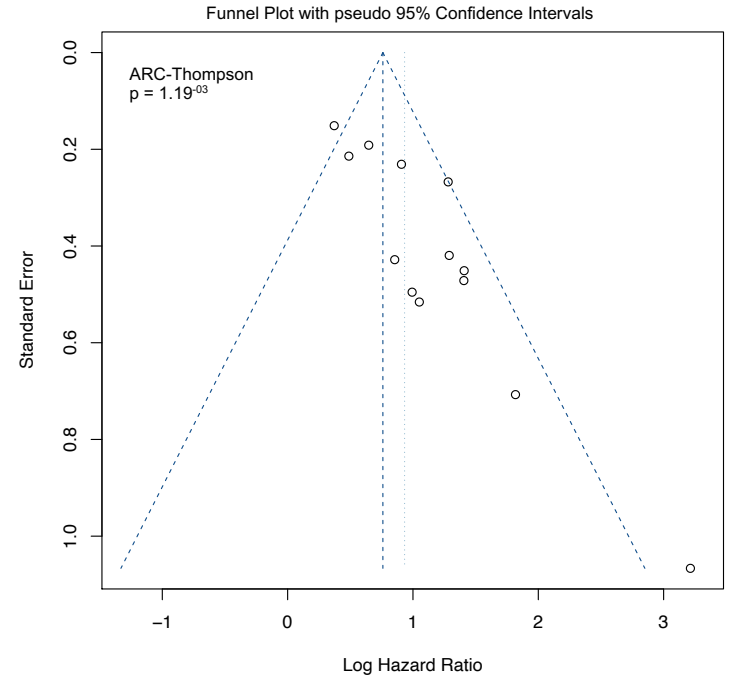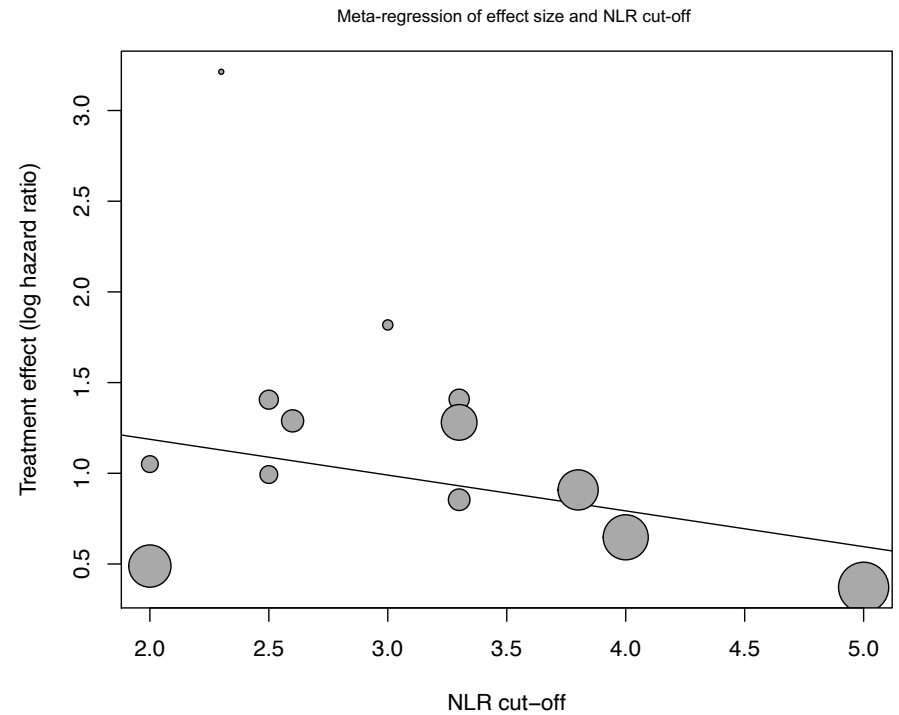

### Supplementary Figure 48 - NLR: OS in breast cancer with metastasis

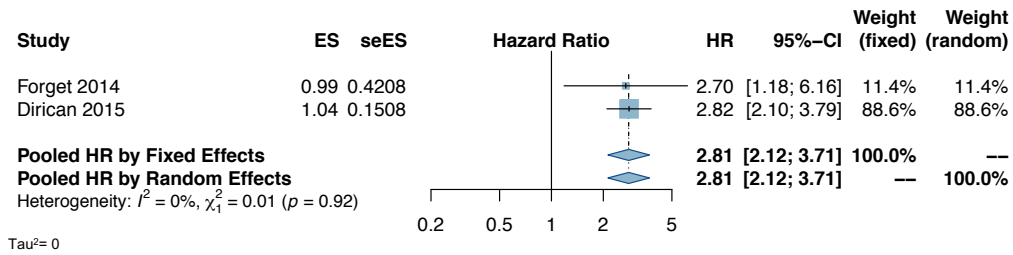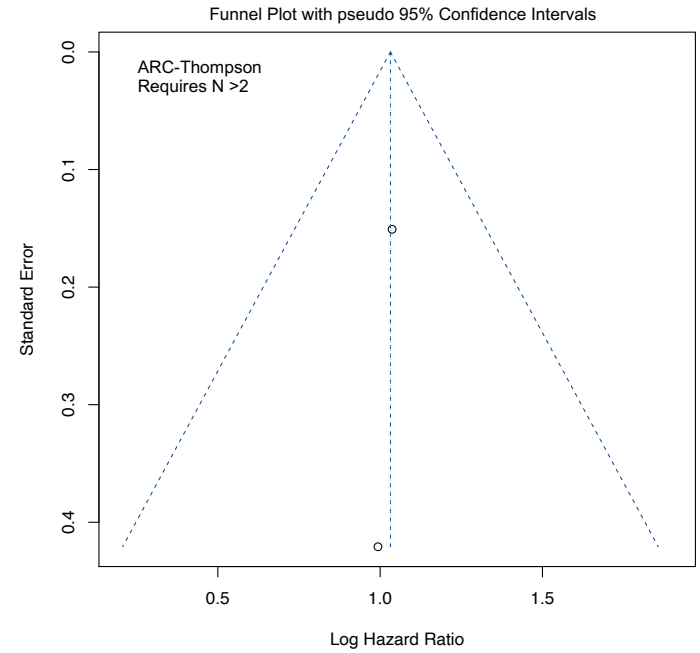

### Supplementary Figure 49 - NLR: OS in breast cancer without metastasis

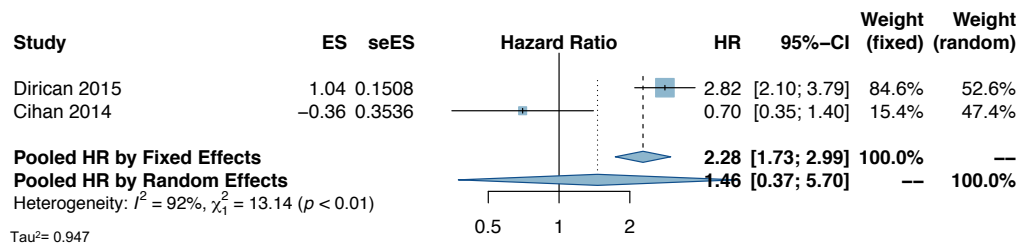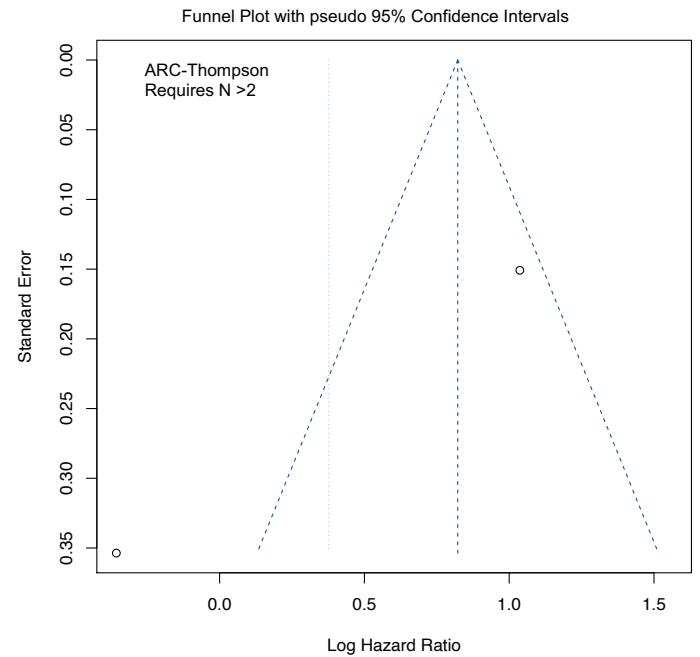

### Supplementary Figure 50 - NLR: OS in triple-negative breast cancer

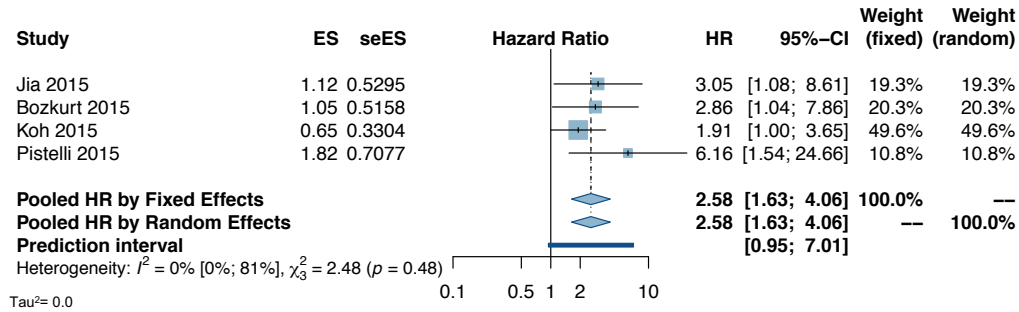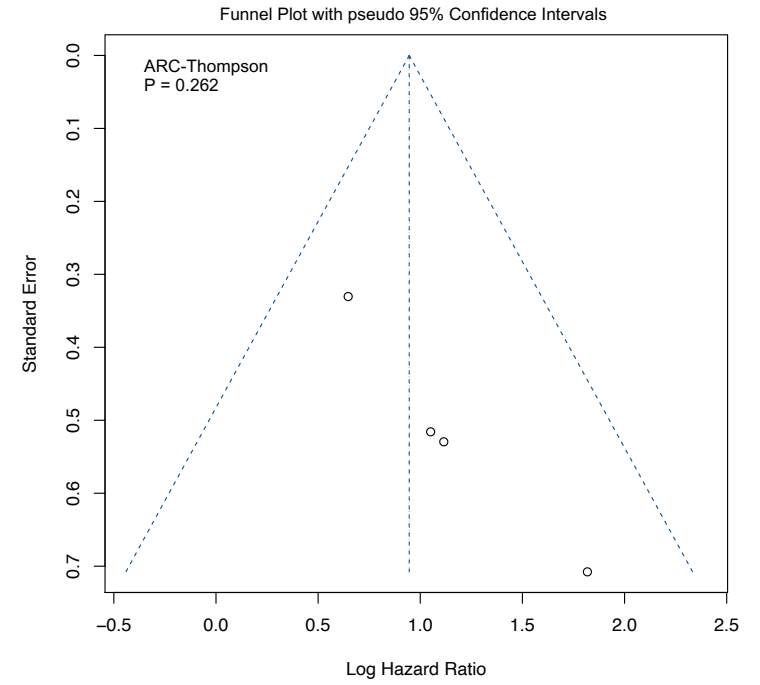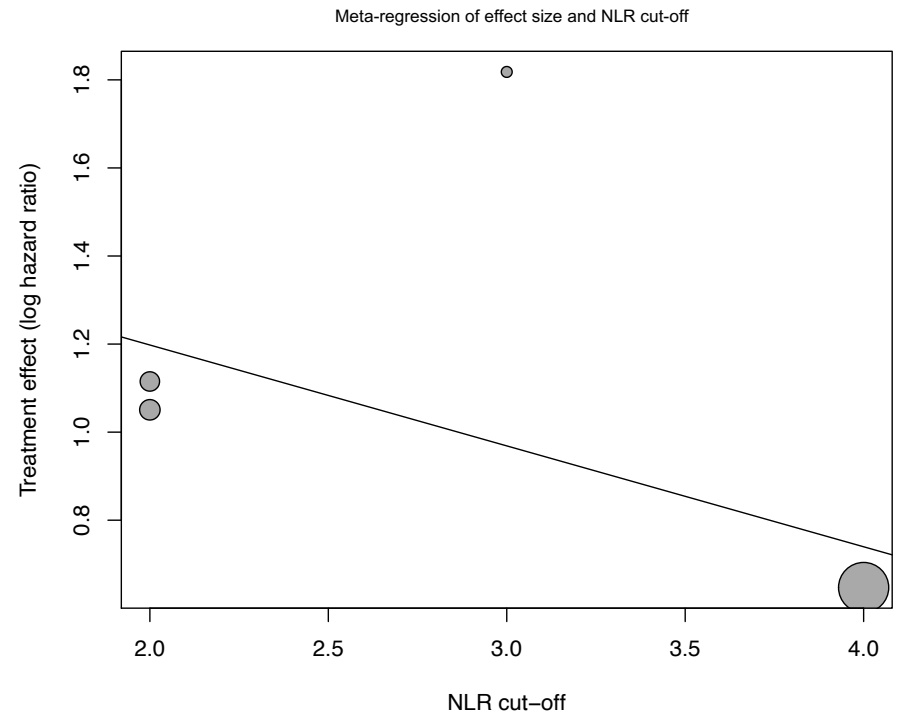

### Supplementary Figure 51 - NLR: DFS in breast cancer

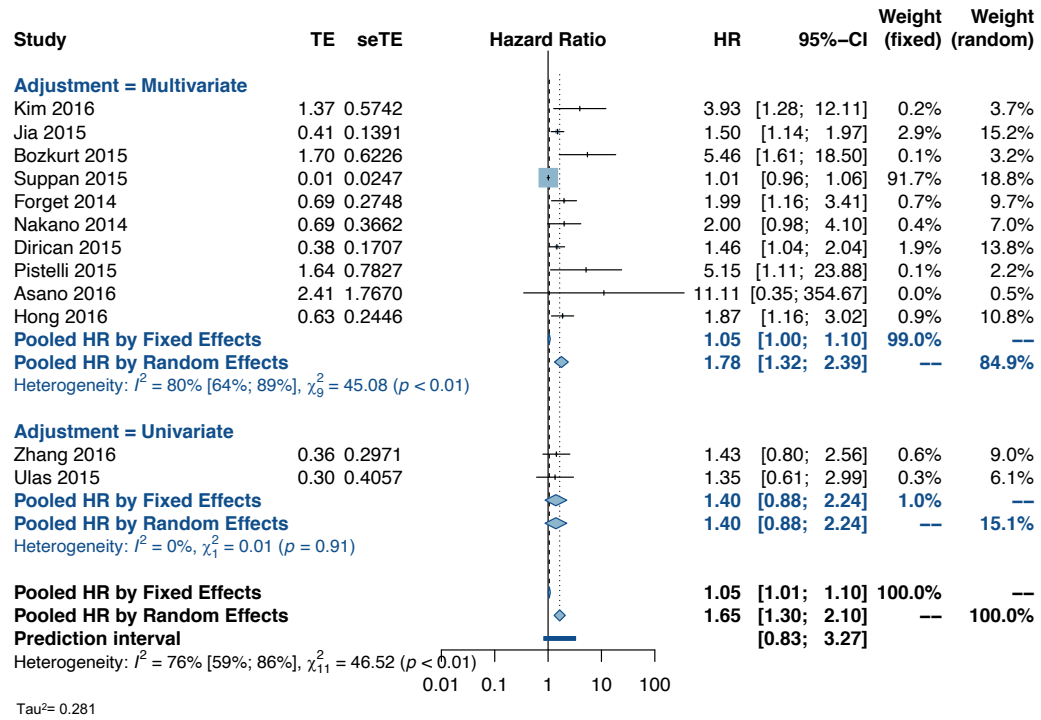

Tau<sup>2</sup> = 0.281

Funnel Plot with pseudo 95% Confidence Intervals

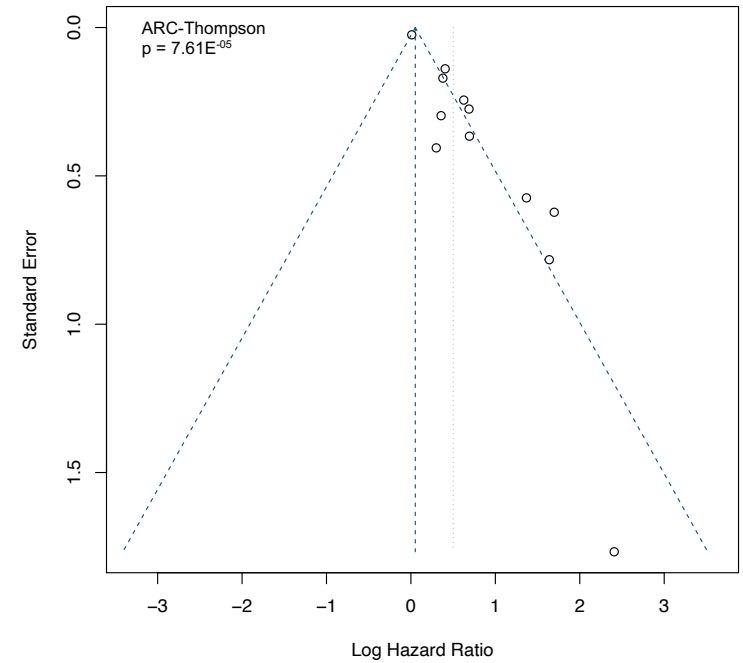

Meta-regression of effect size and NLR cut-off

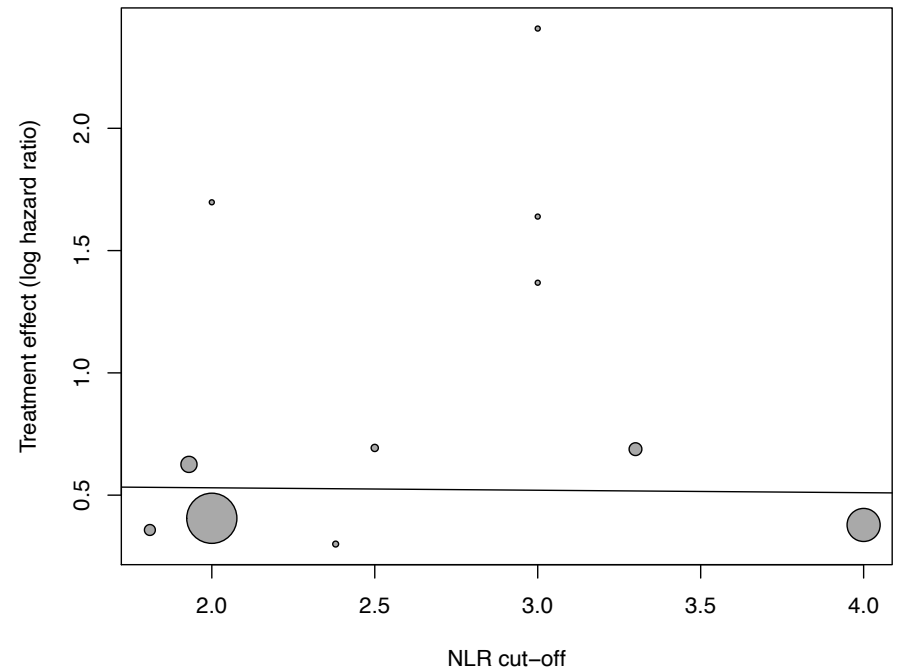

Supplementary Figure 52 - NLR: DFS in breast cancer with metastasis

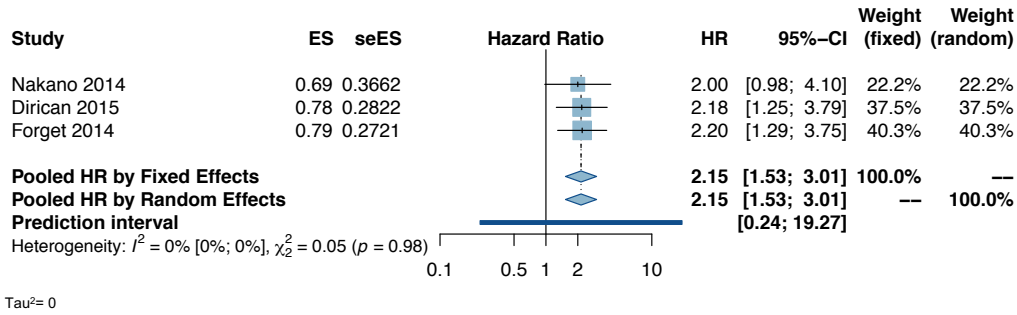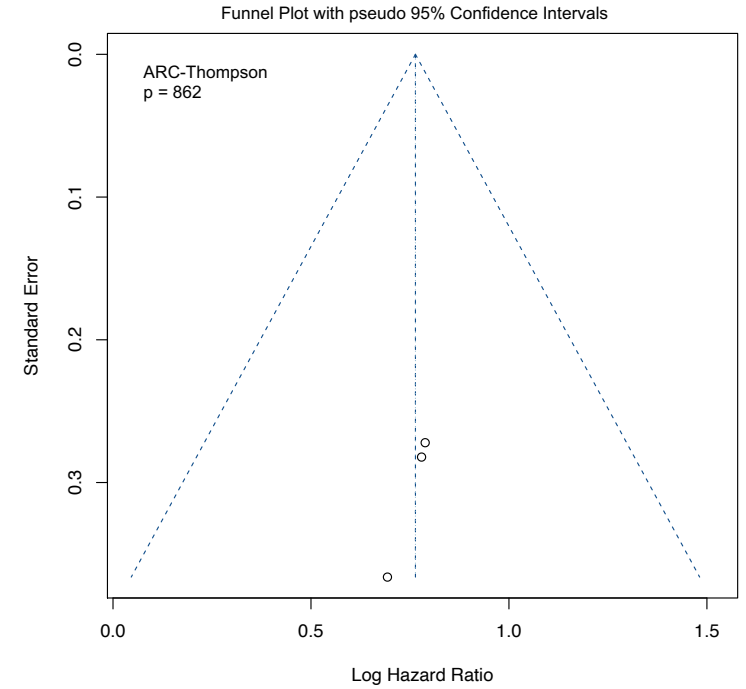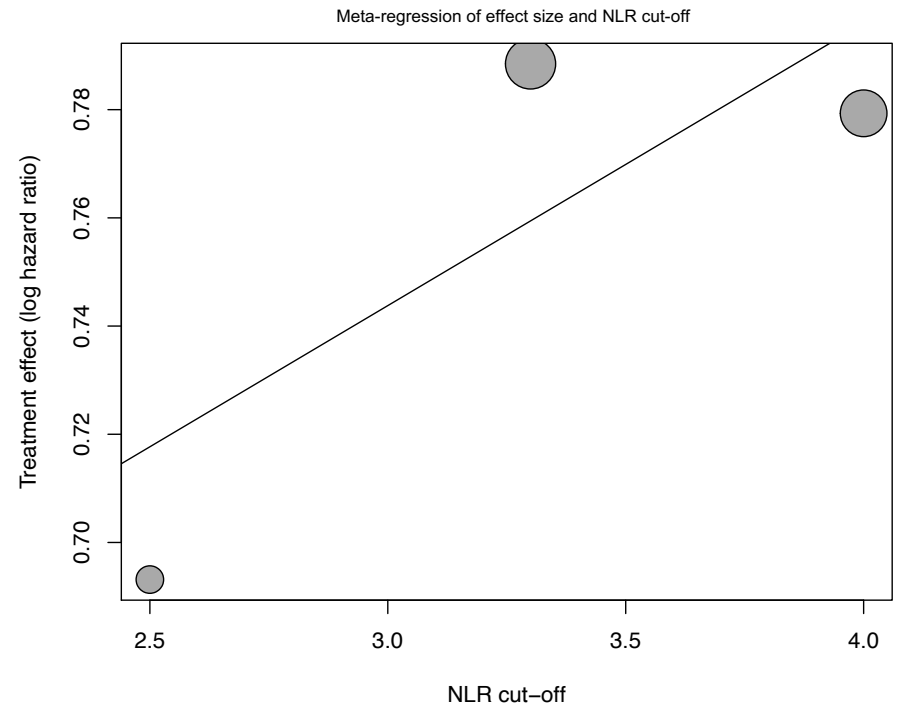



**Supplementary Figure 53 - NLR: DFS in breast cancer without metastasis**

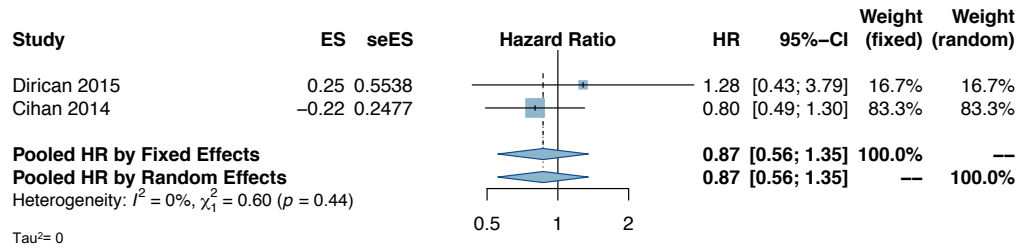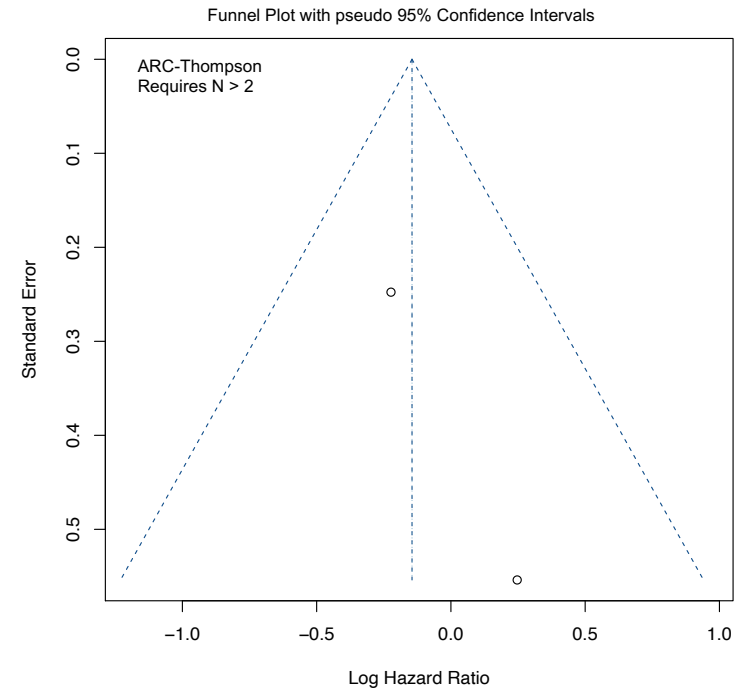

Supplementary Figure 54 - NLR: DFS in triple-negative breast cancer

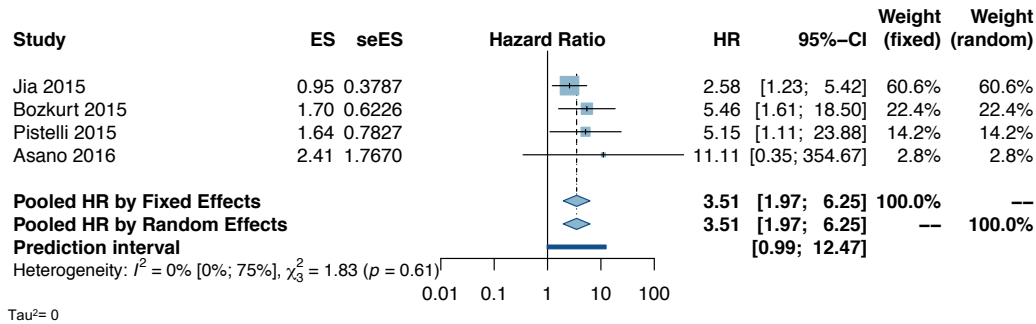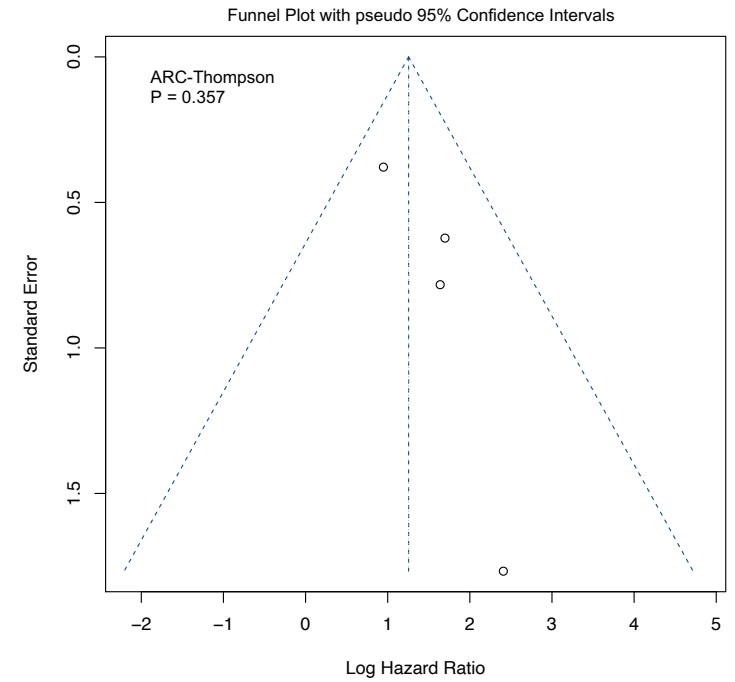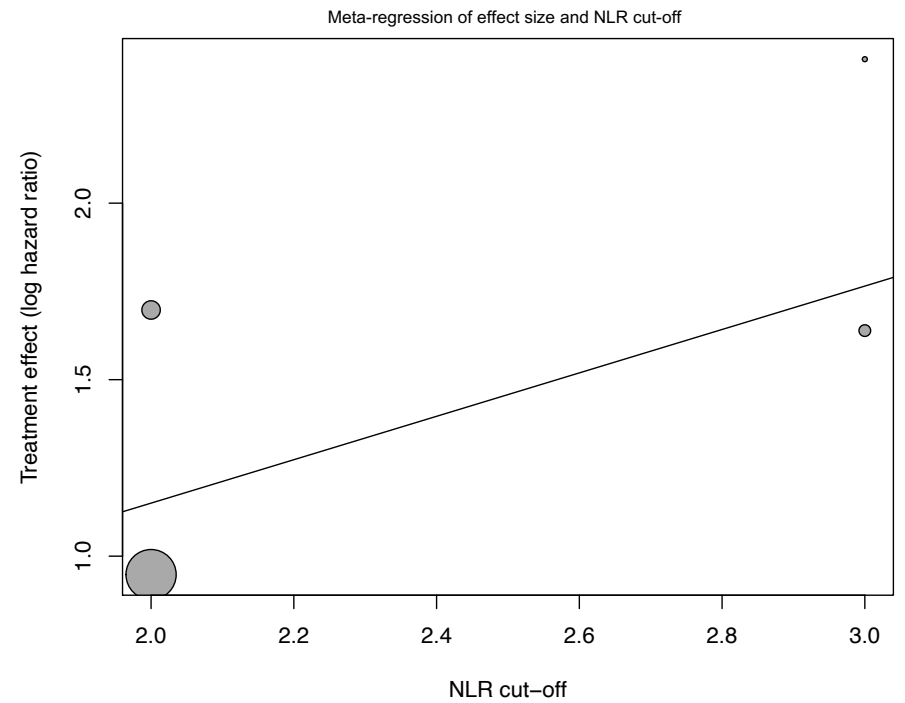

### Supplementary Figure 55 - NLR: CSS in breast cancer

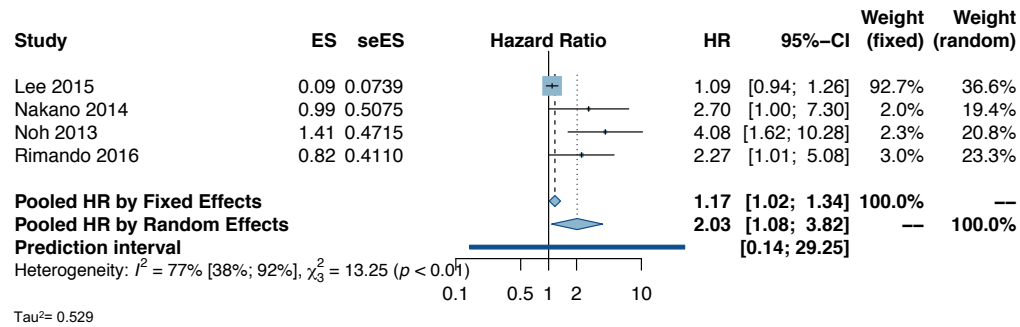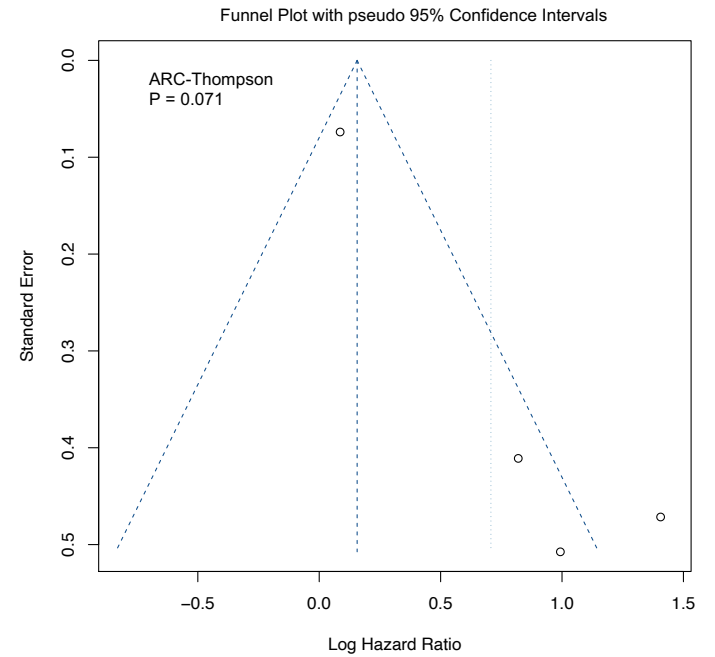

### Supplementary Figure 56 - IN: OS in hepatocellular carcinoma and cholangiocarcinoma

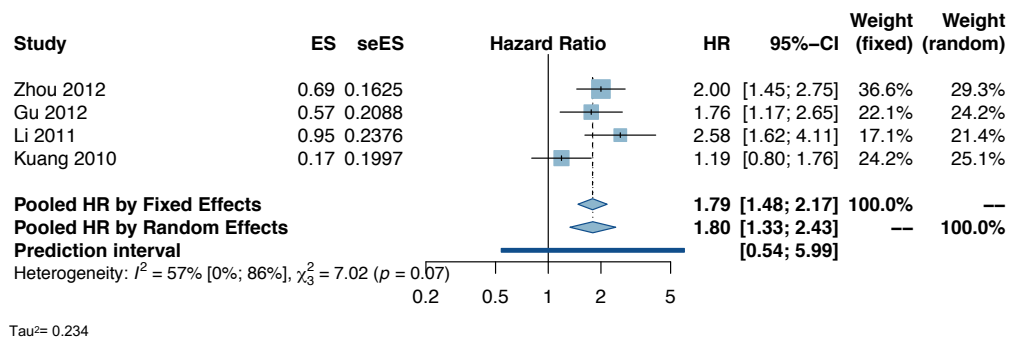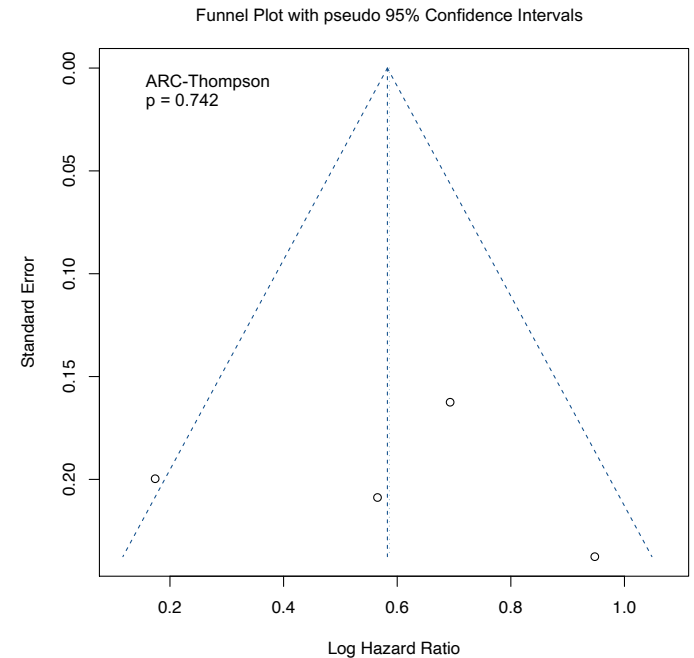

### Supplementary Figure 57 - NLR: OS in hepatocellular carcinoma

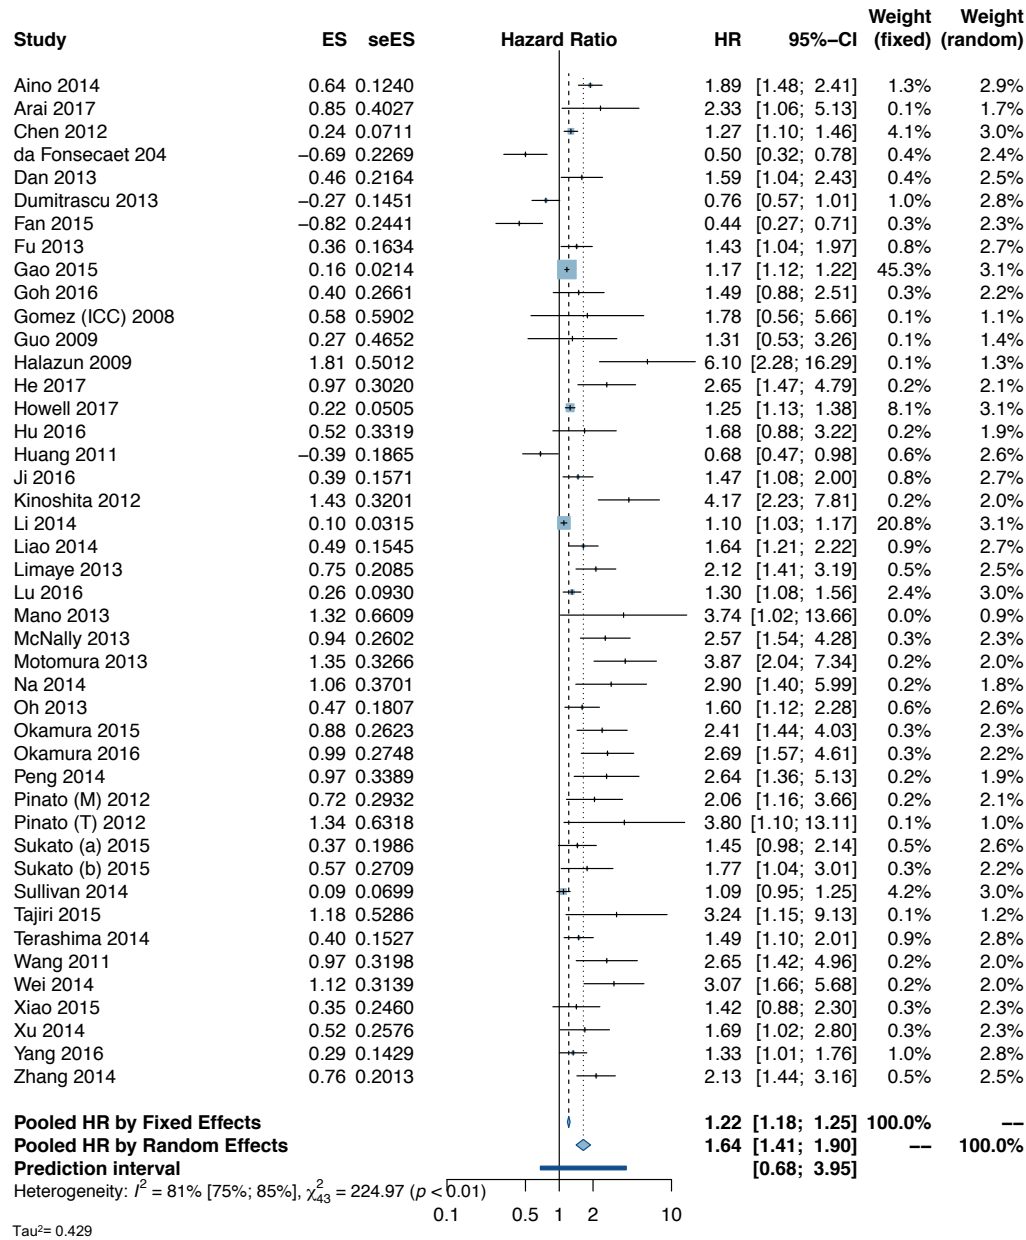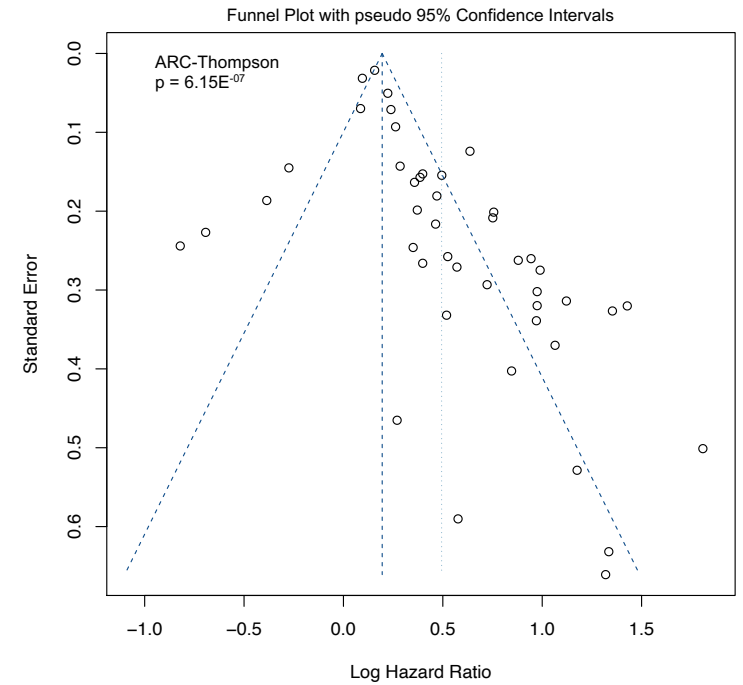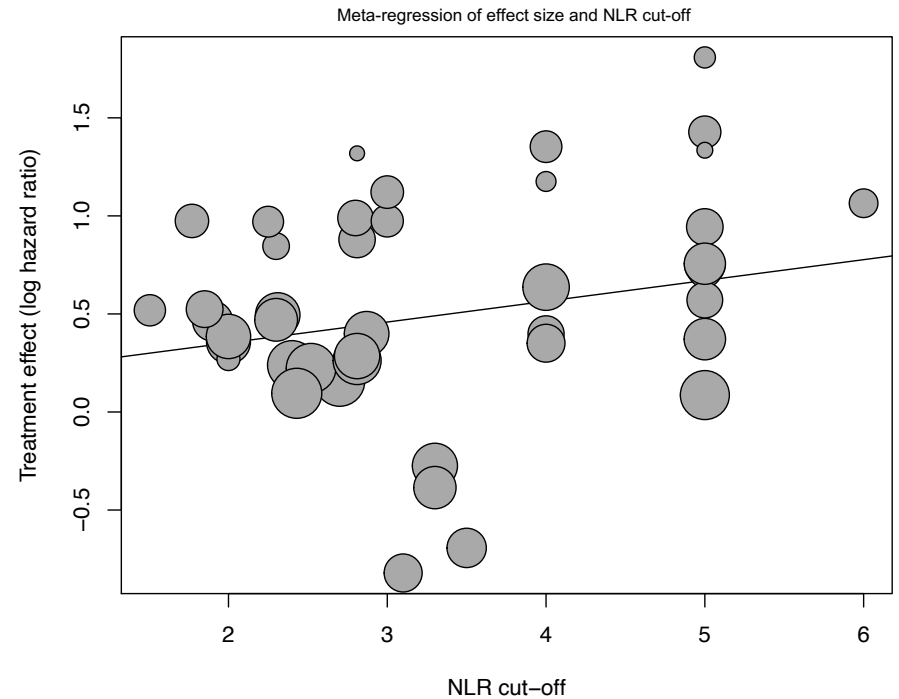

Supplementary Figure 58 - NLR: OS in hepatocellular carcinoma with transplant

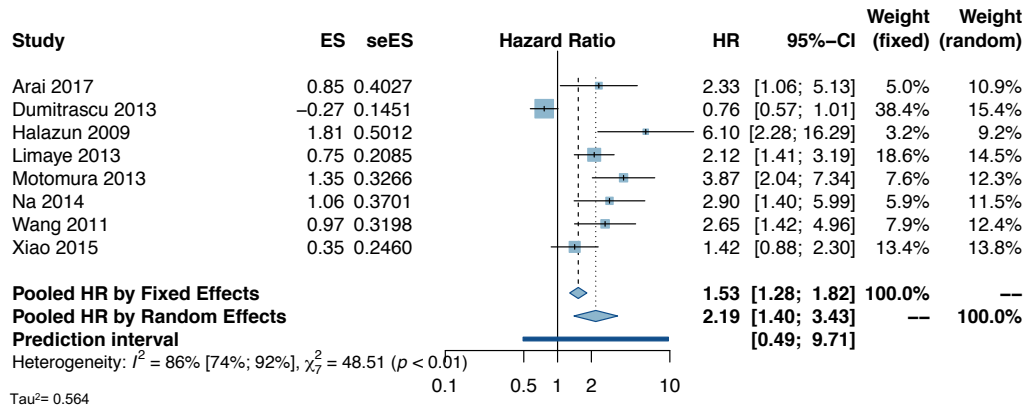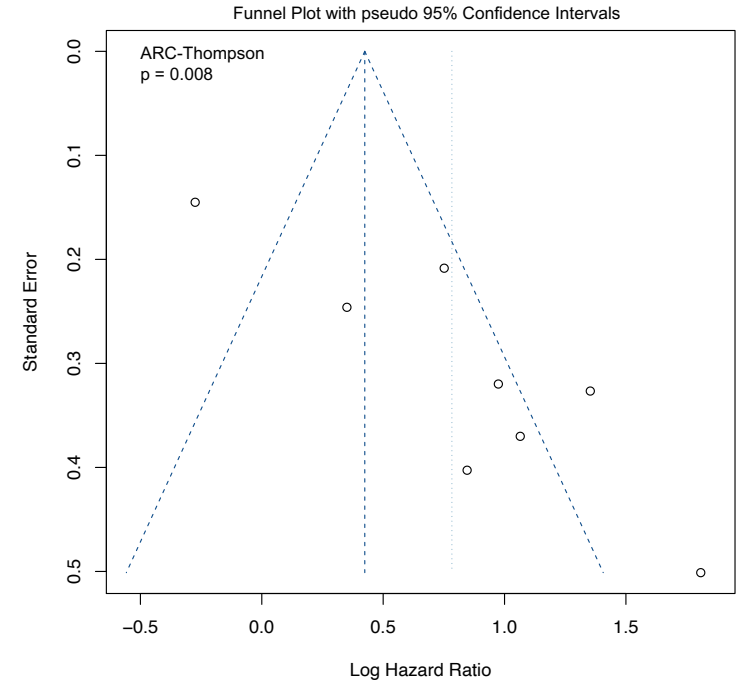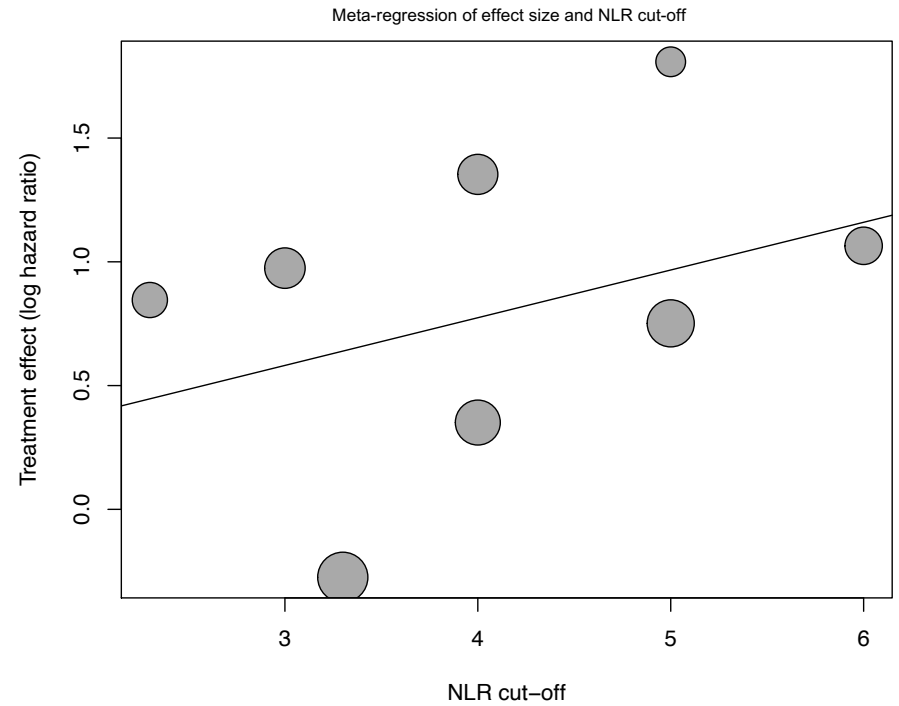

Supplementary Figure 59 - NLR: OS in hepatocellular carcinoma with radiofrequency ablation

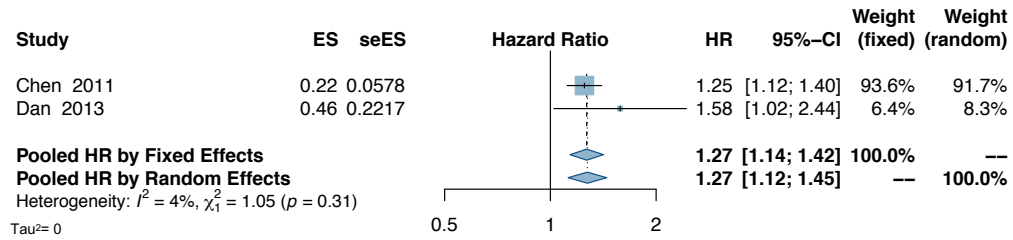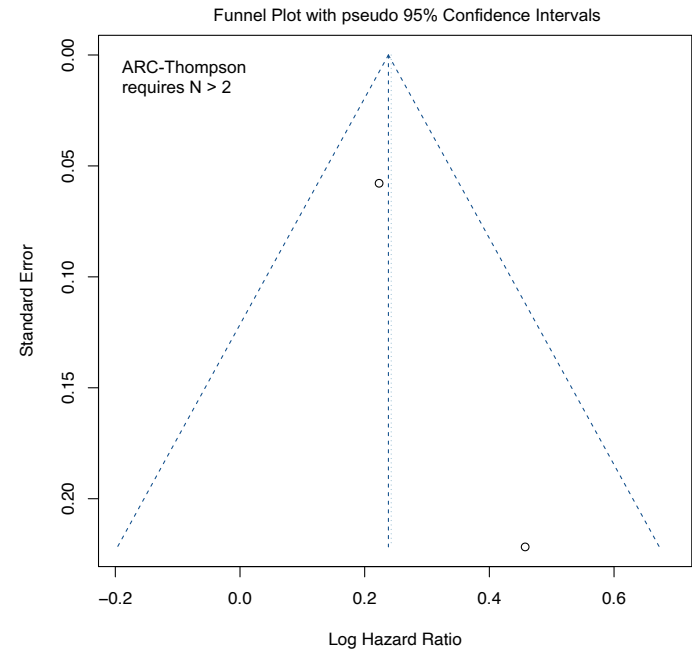

Supplementary Figure 60 - NLR: OS in hepatocellular carcinoma with mixed treatment

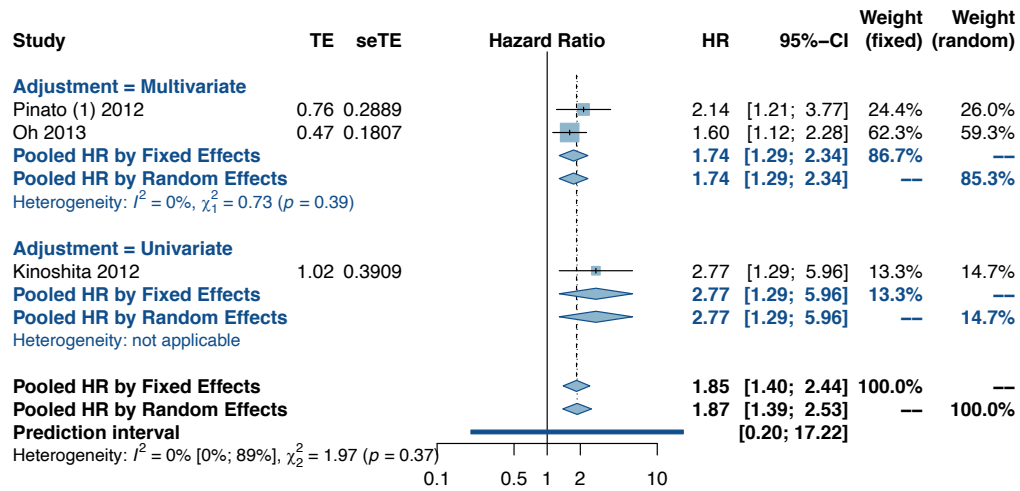

Tau<sup>2</sup> = 0.84

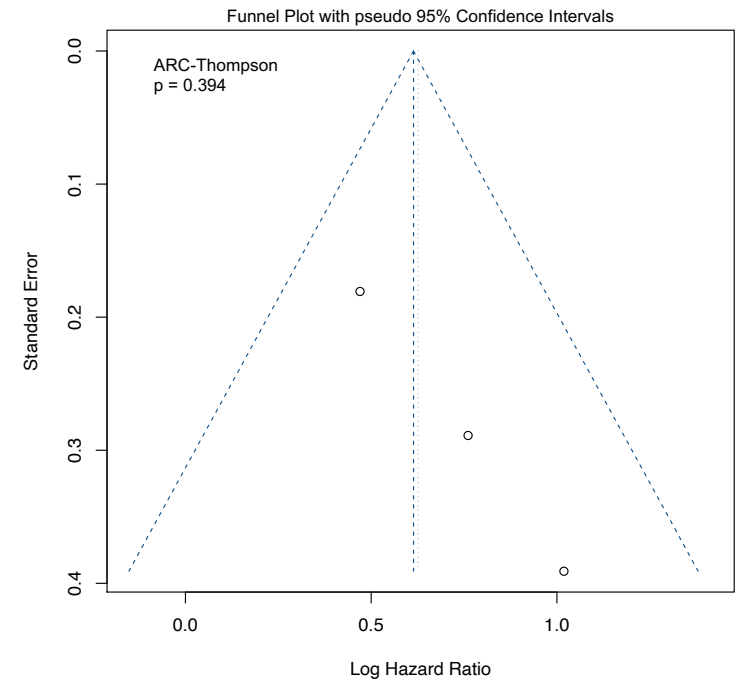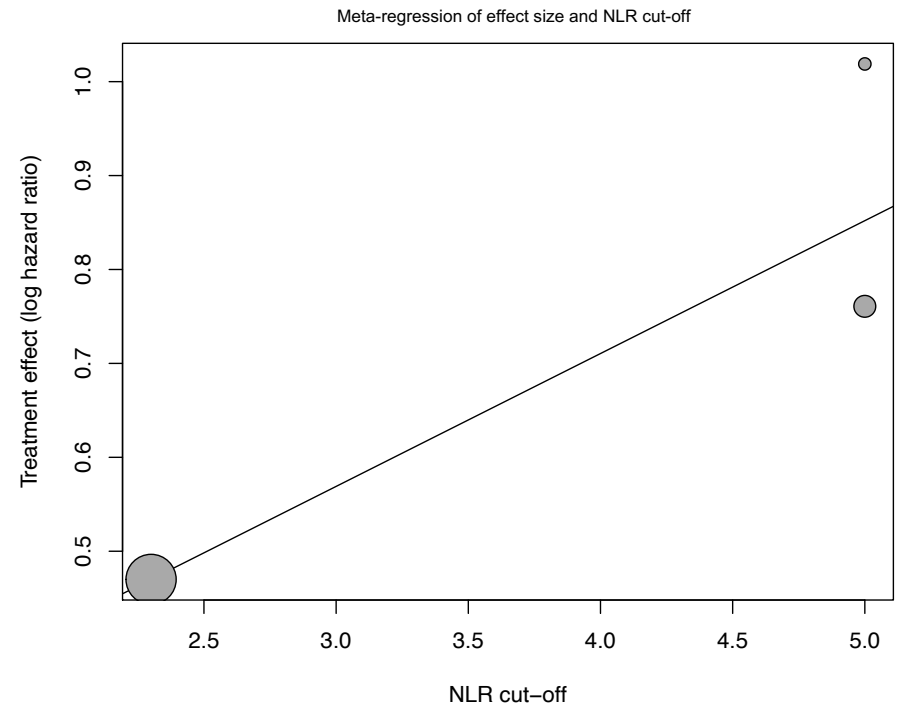

**Supplementary Figure 61 - NLR: DFS in hepatocellular carcinoma**

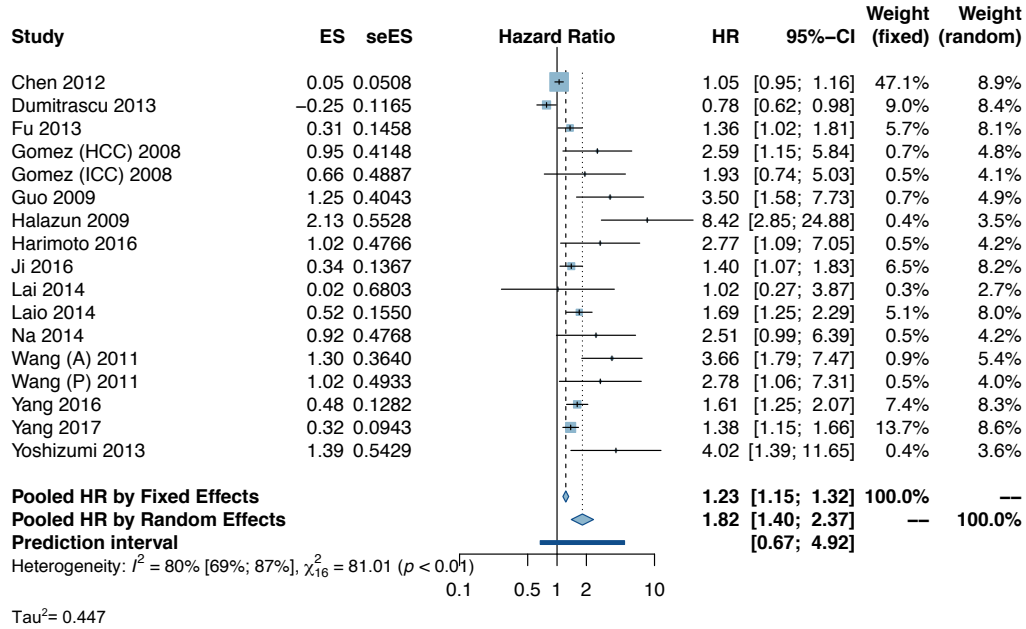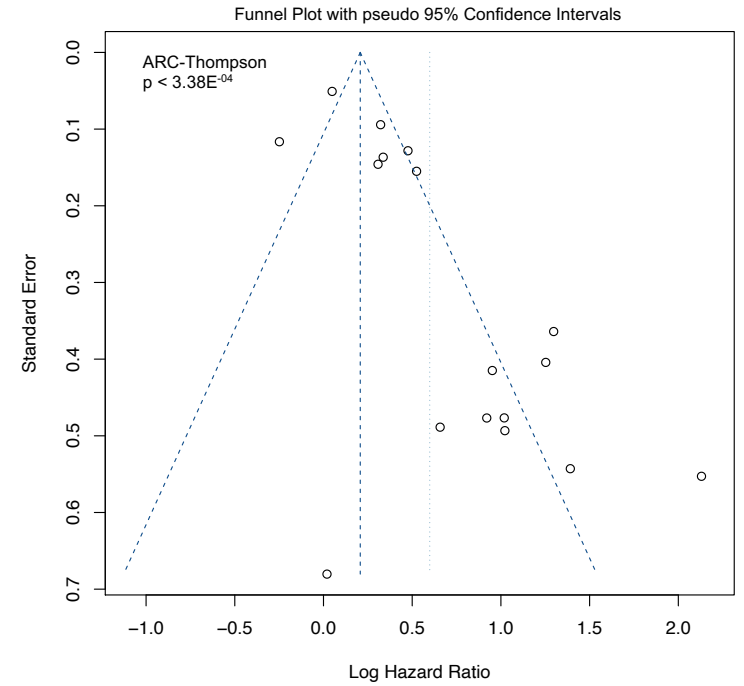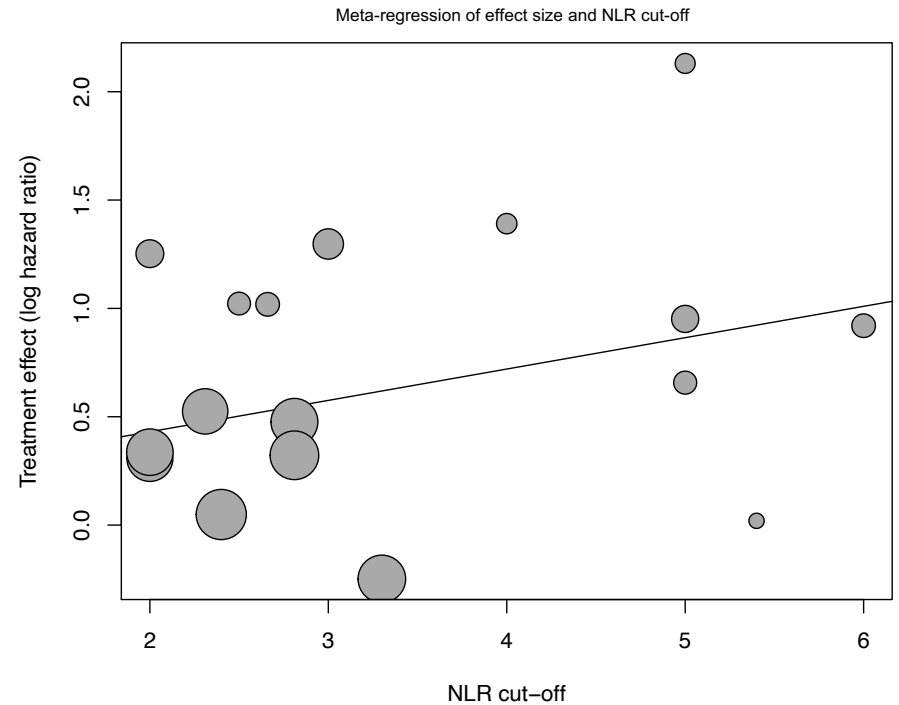



Supplementary Figure 62 - NLR: DFS in hepatocellular carcinoma with radiofrequency ablation

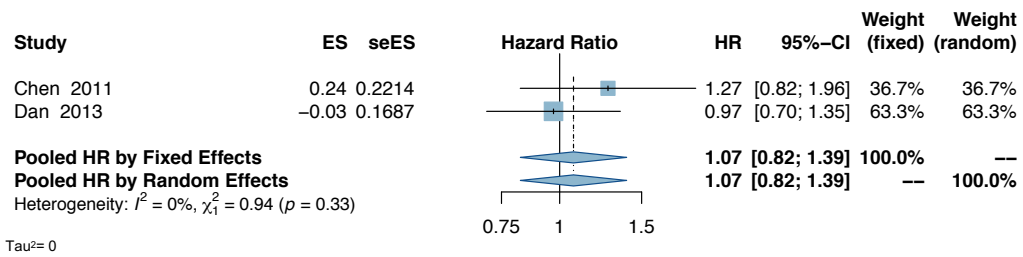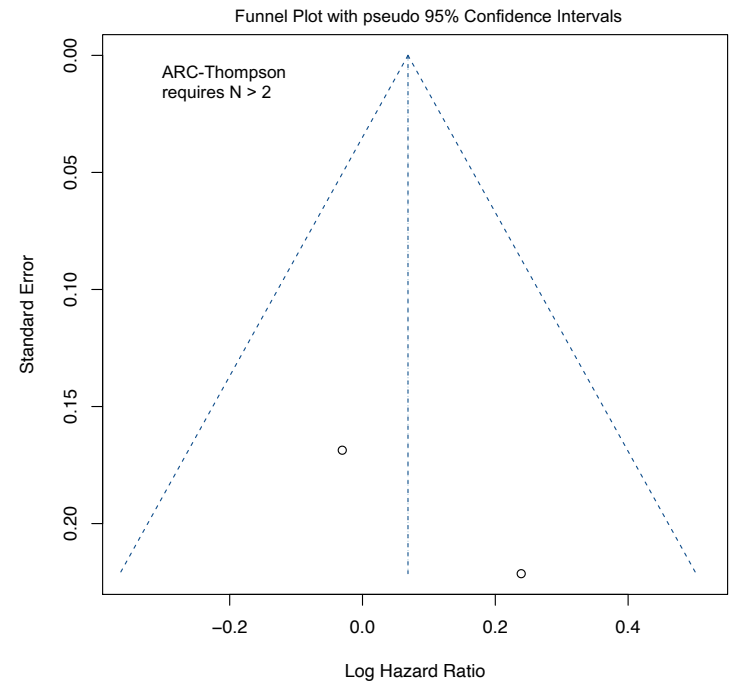

**Supplementary Figure 63 - NLR: RFS in hepatocellular carcinoma**

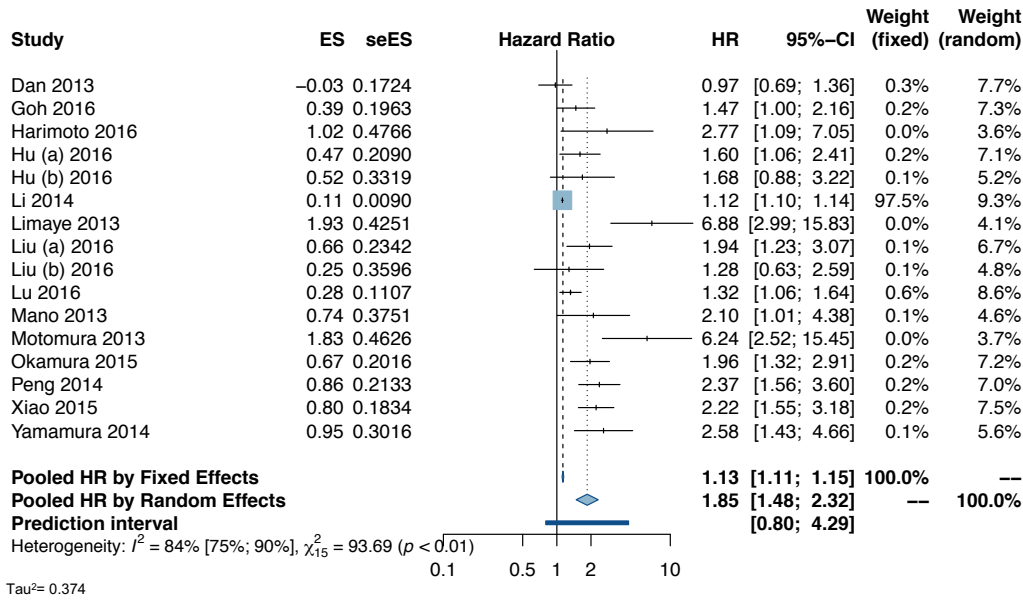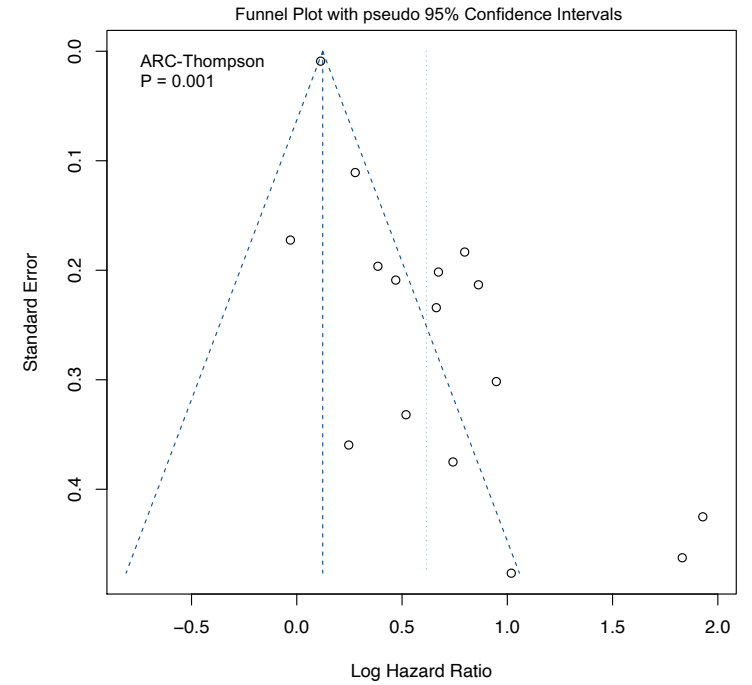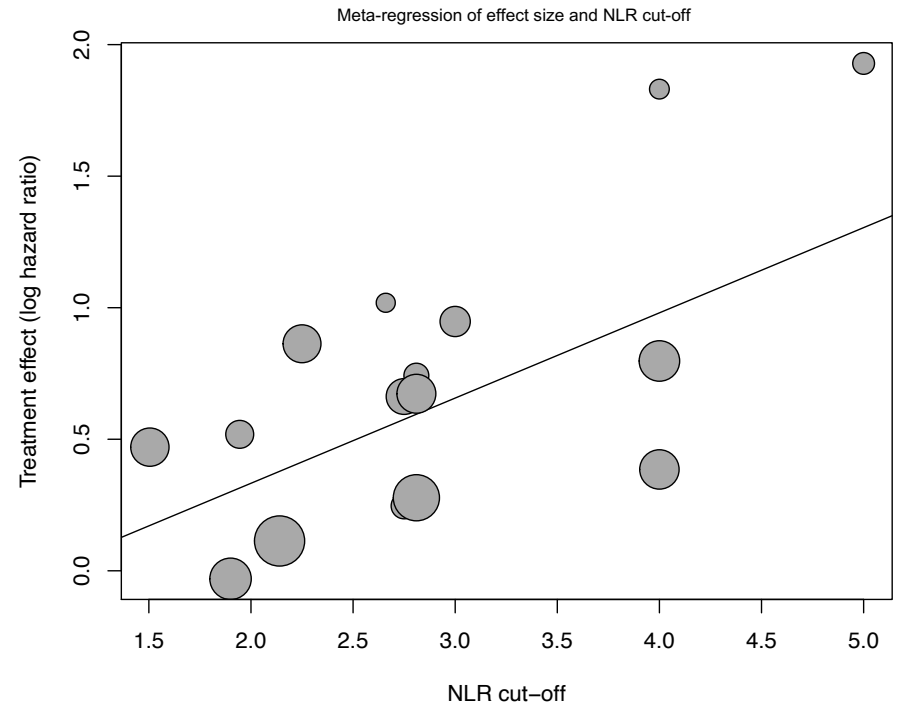

**Supplementary Figure 64 - NLR: RFS in hepatocellular carcinoma with transplant**

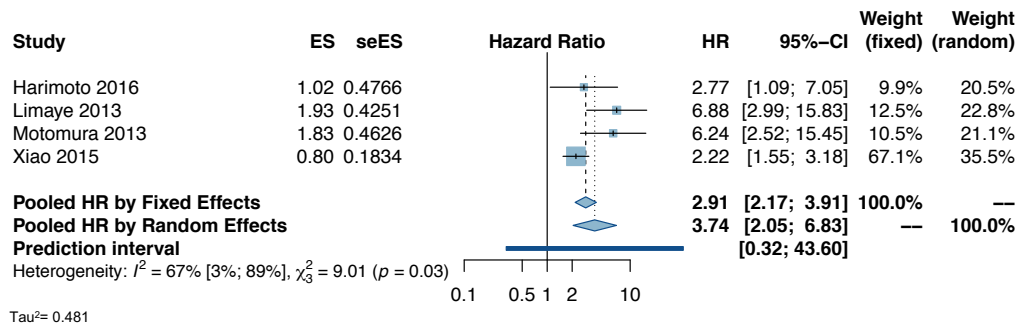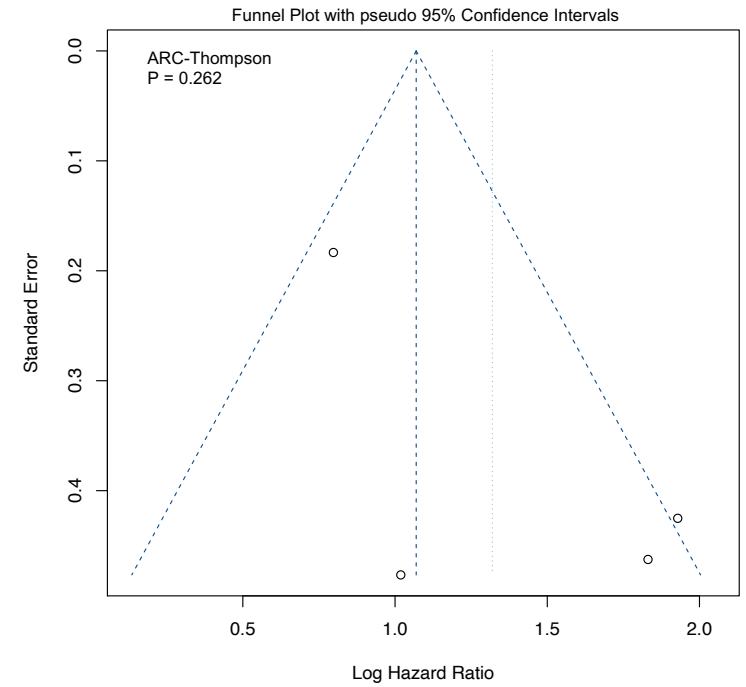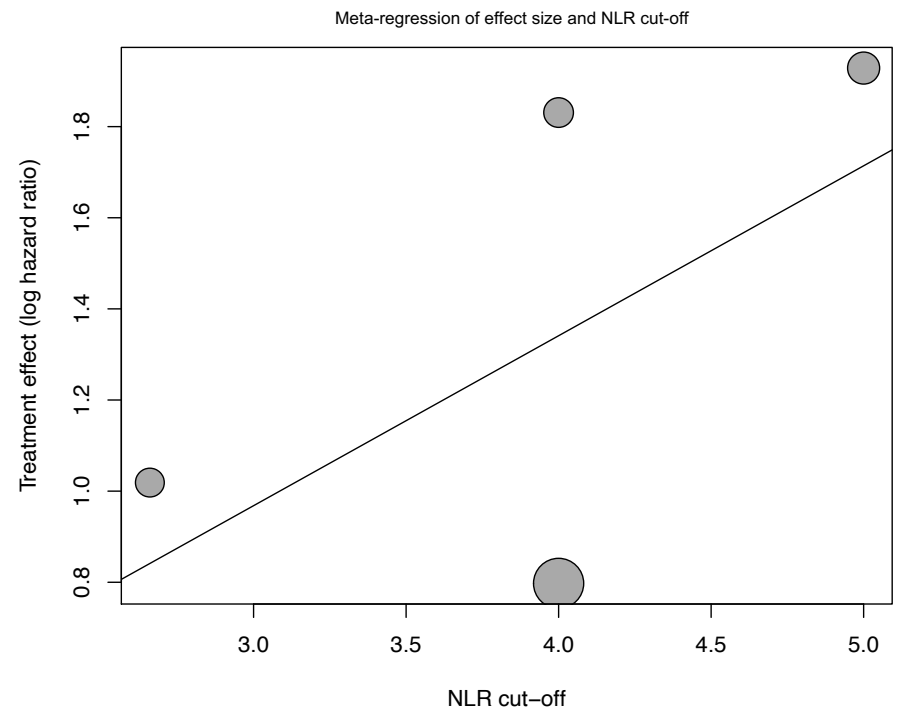

Supplementary Figure 65 - NLR: RFS in hepatocellular carcinoma with resection

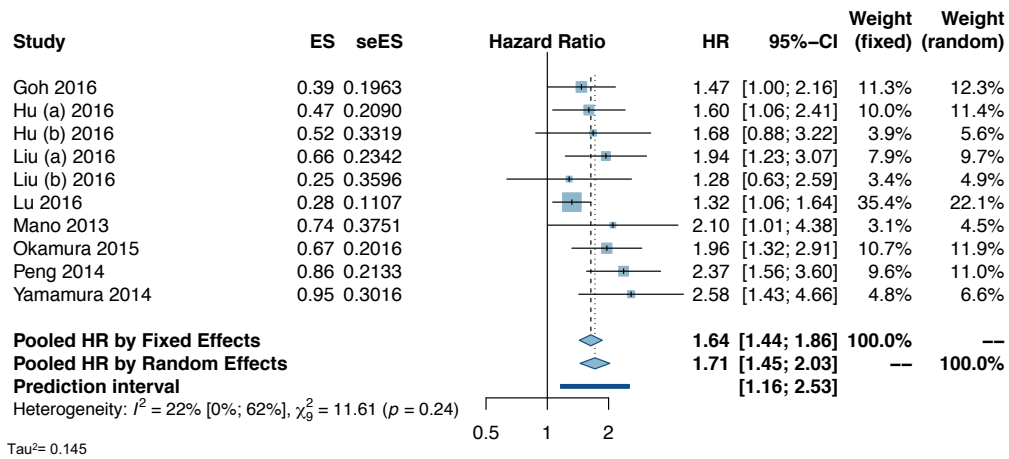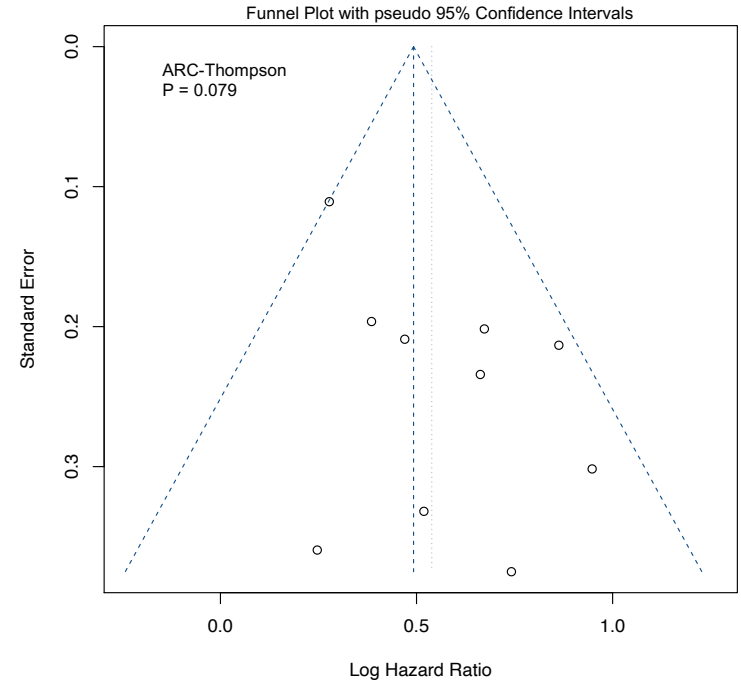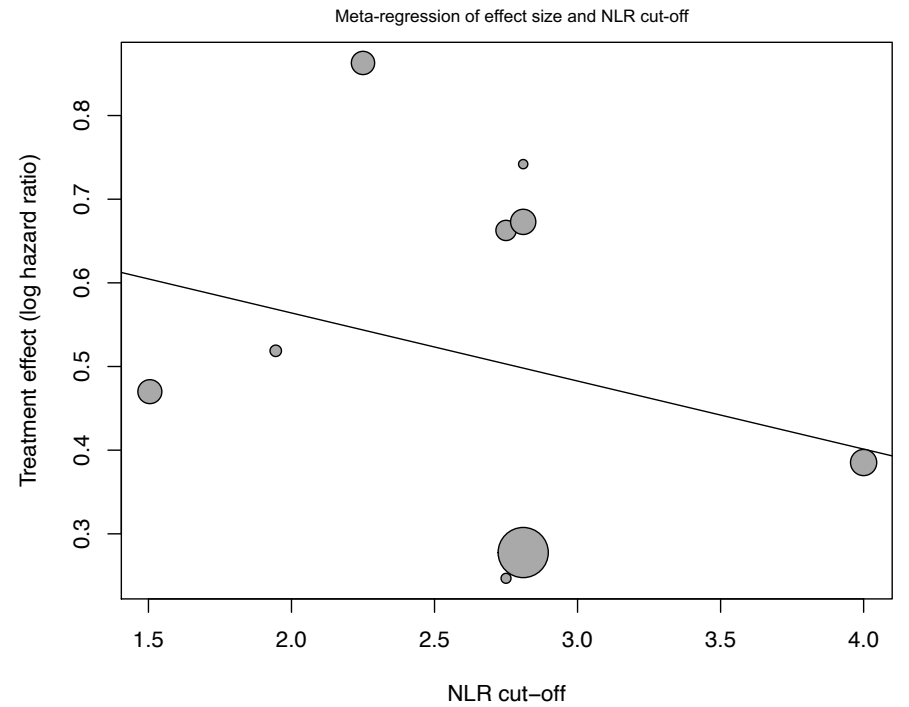

Supplementary Figure 66 - NLR: OS in biliary tract cancer

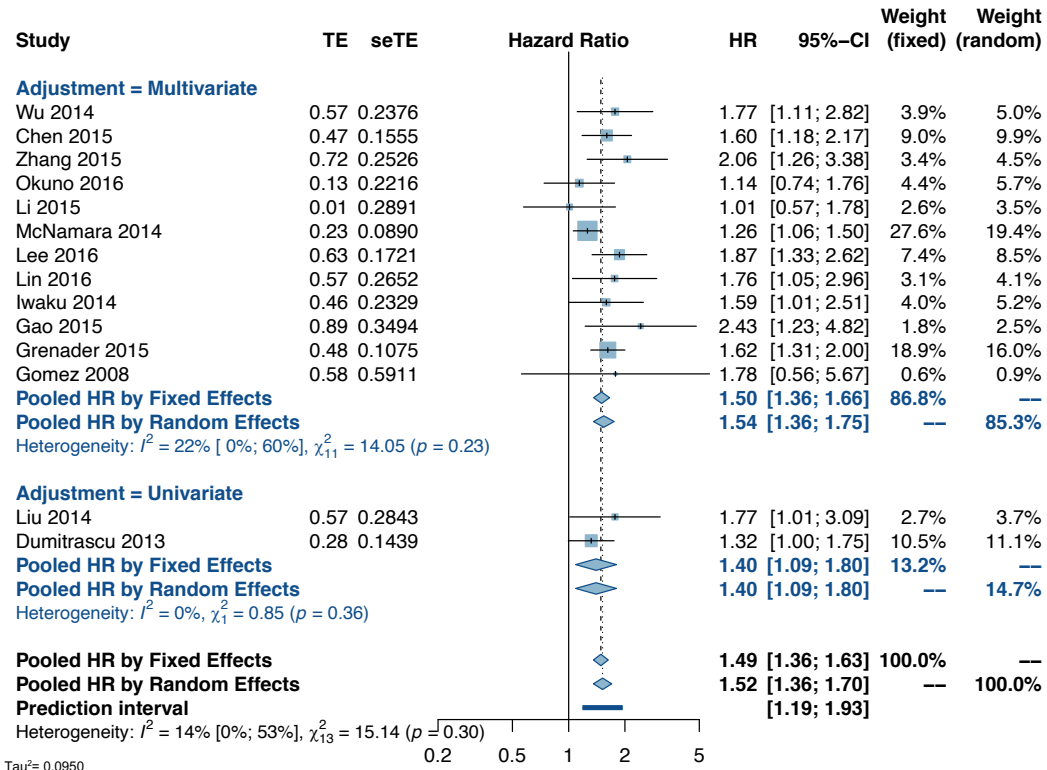

Tau<sup>2</sup> = 0.0950

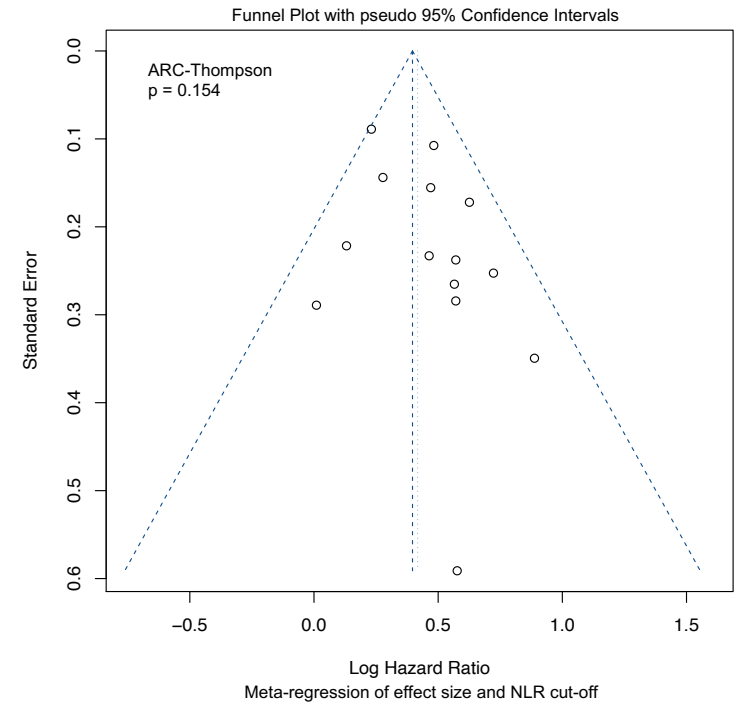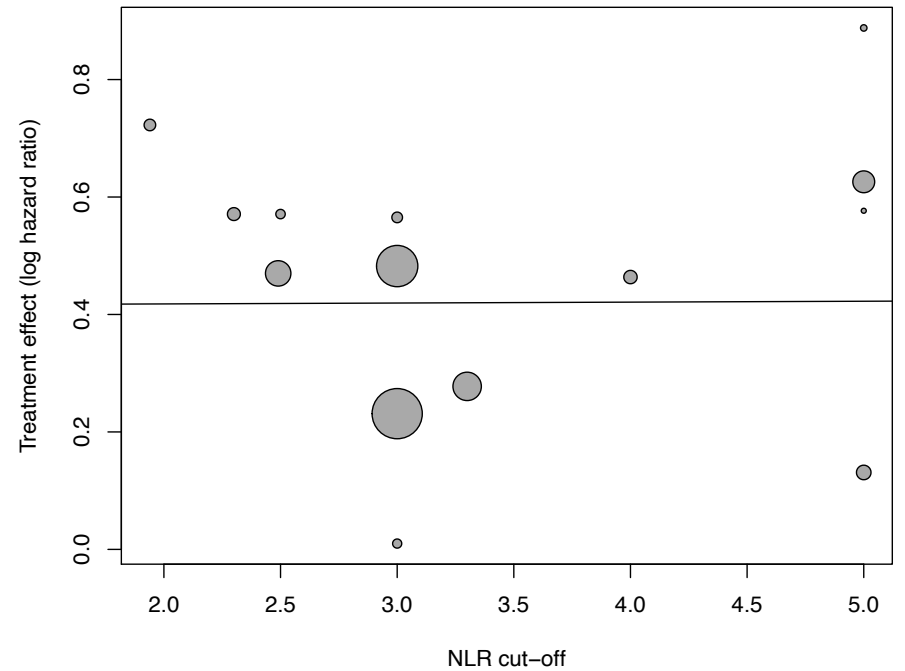

Supplementary Figure 67 - NLR: RFS in biliary tract cancer

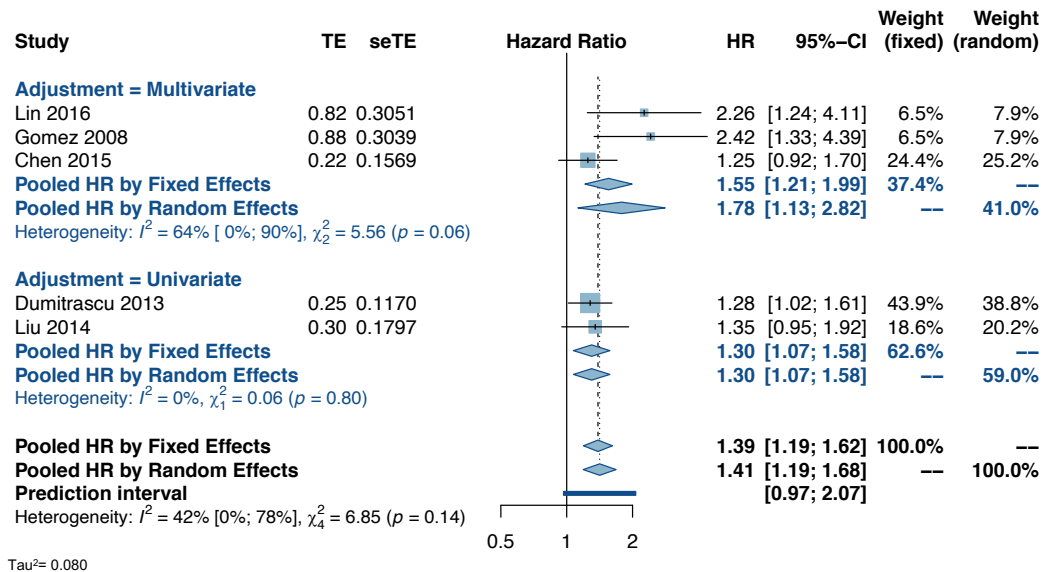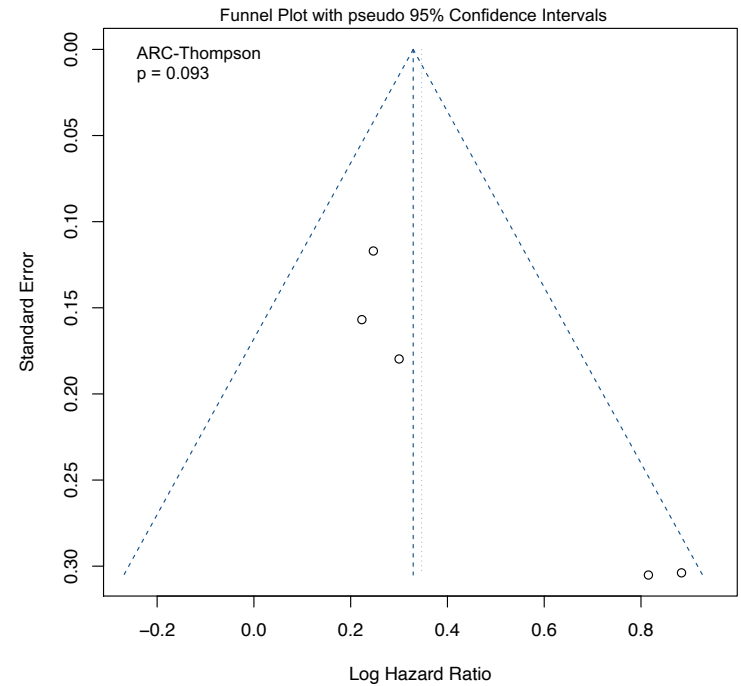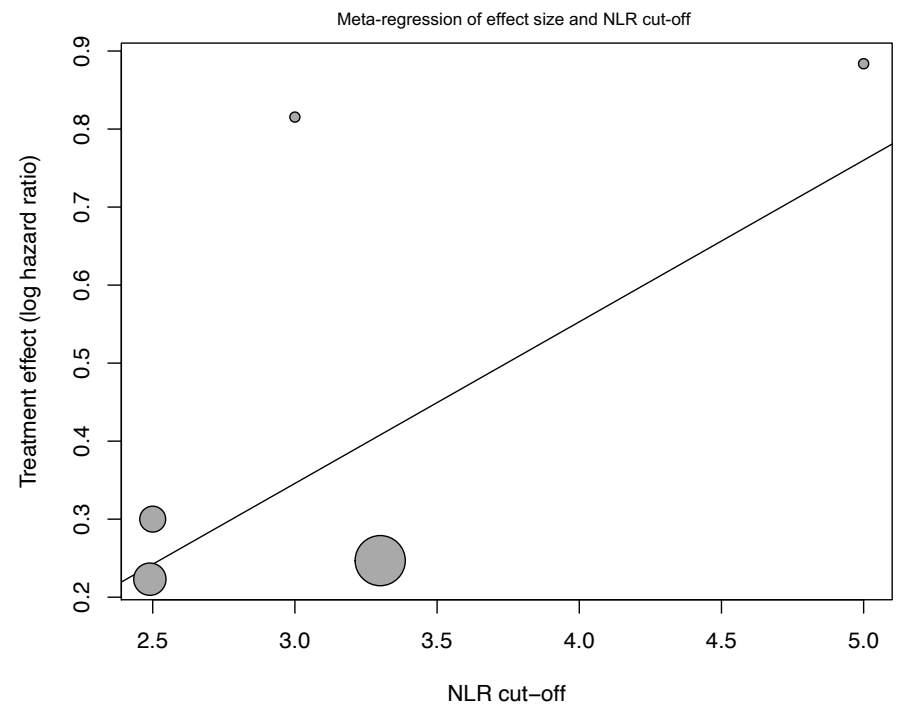

**Supplementary Figure 68 - NLR: OS in large-B cell cancer**

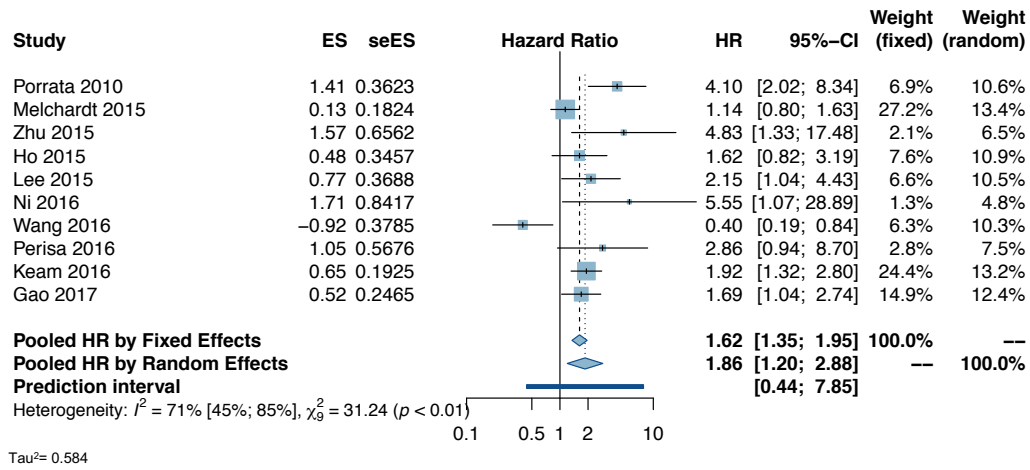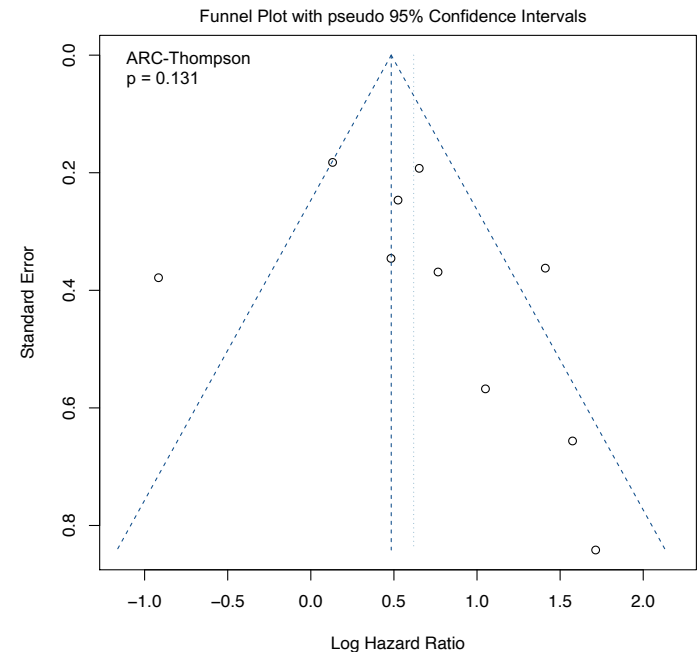

**Supplementary Figure 69 - NLR: PFS in large-B cell cancer**

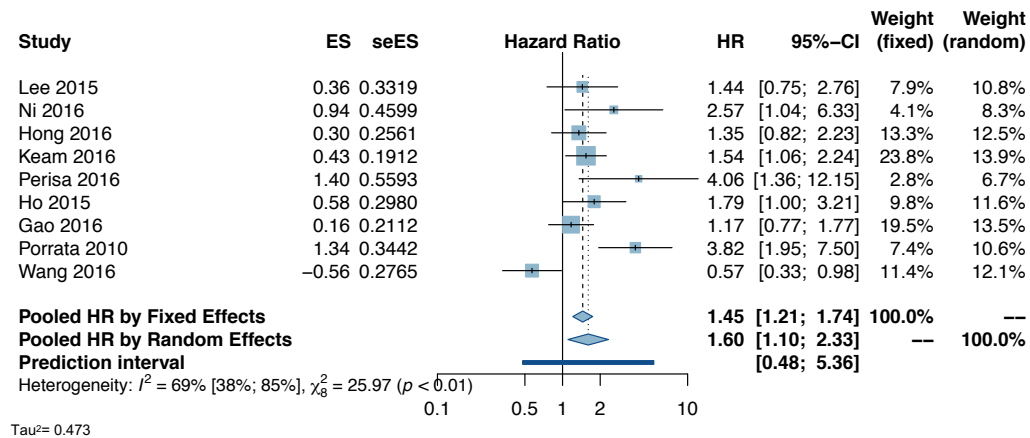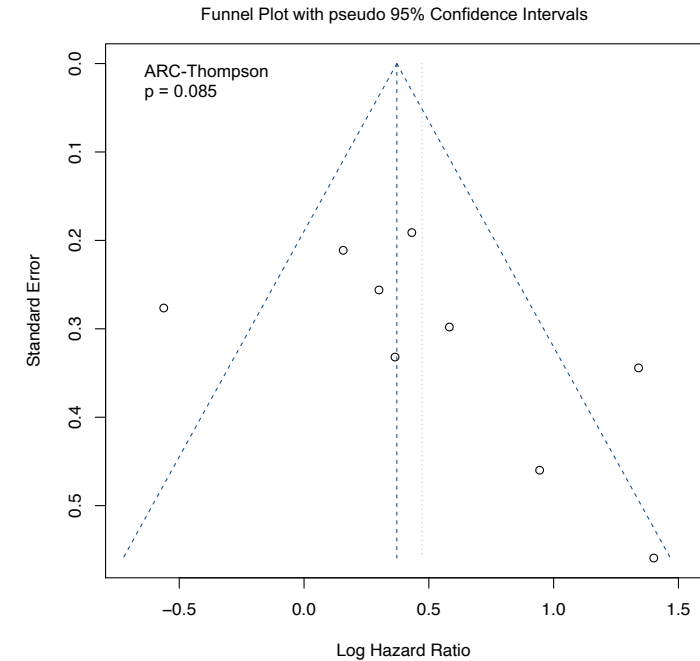

Supplementary Figure 70 - NLR: OS in gastroenteropancreatic neuroendocrine tumour

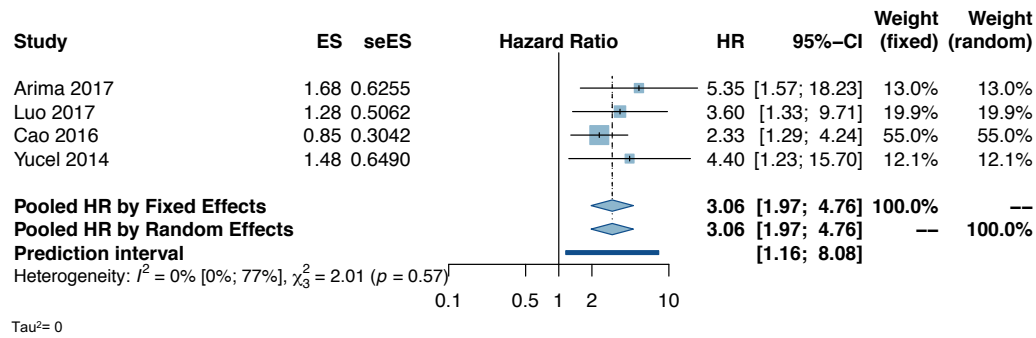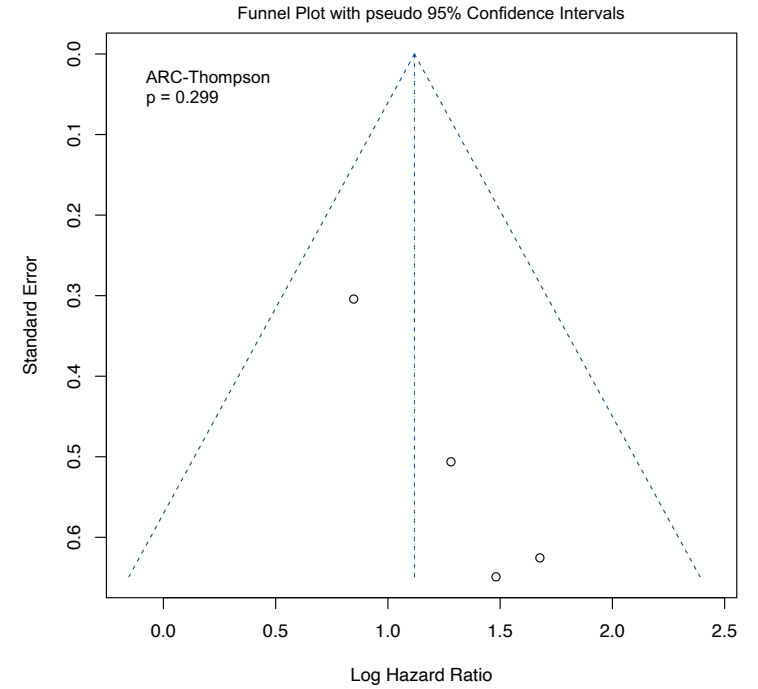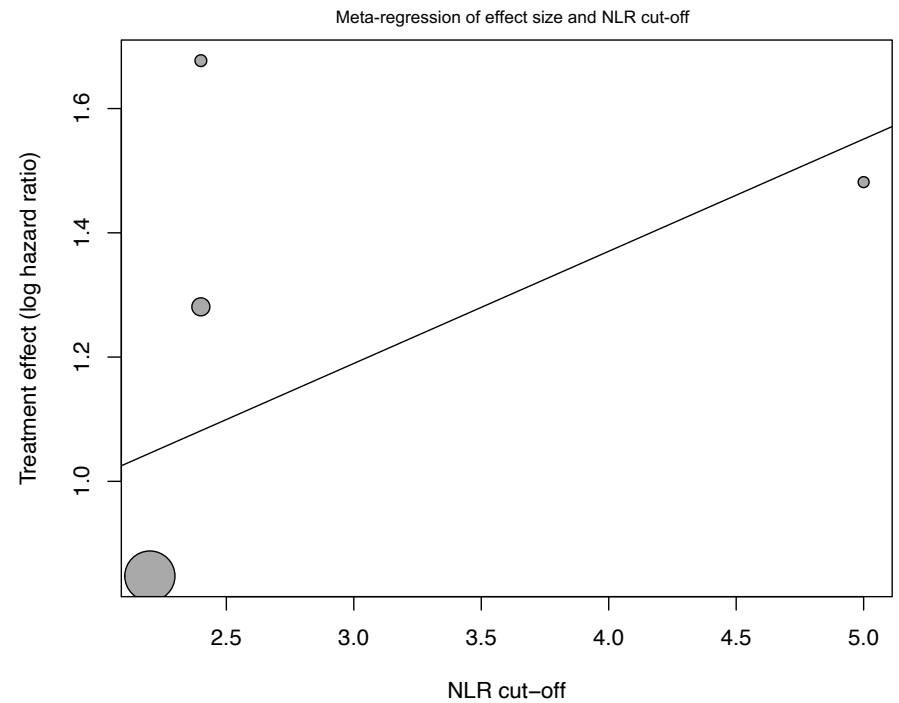



Supplementary Figure 71 - NLR: RFS in gastroenteropancreatic neuroendocrine tumour

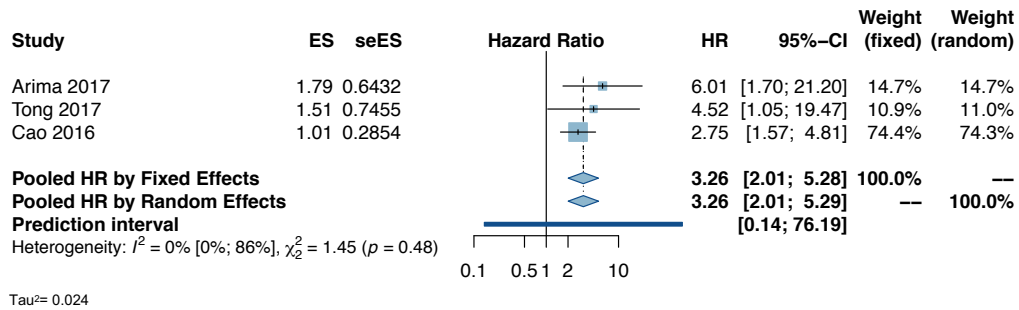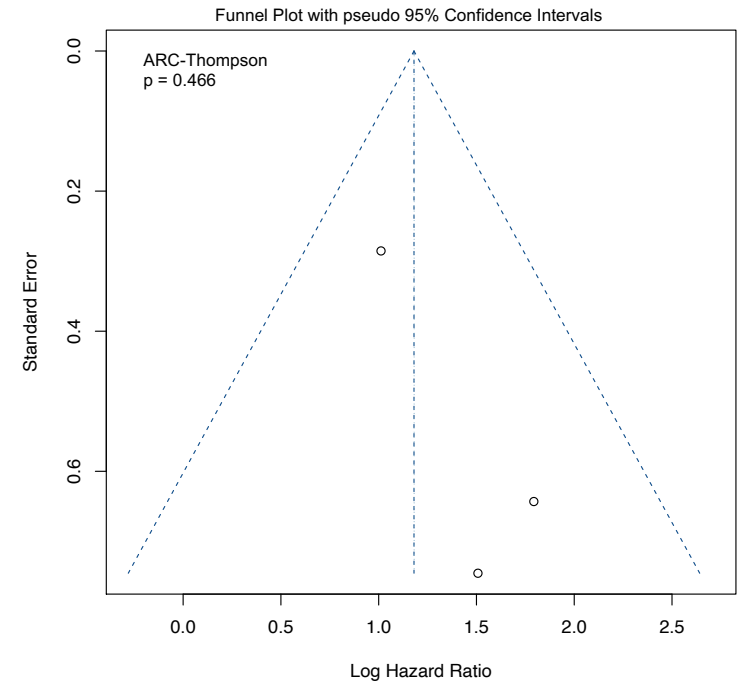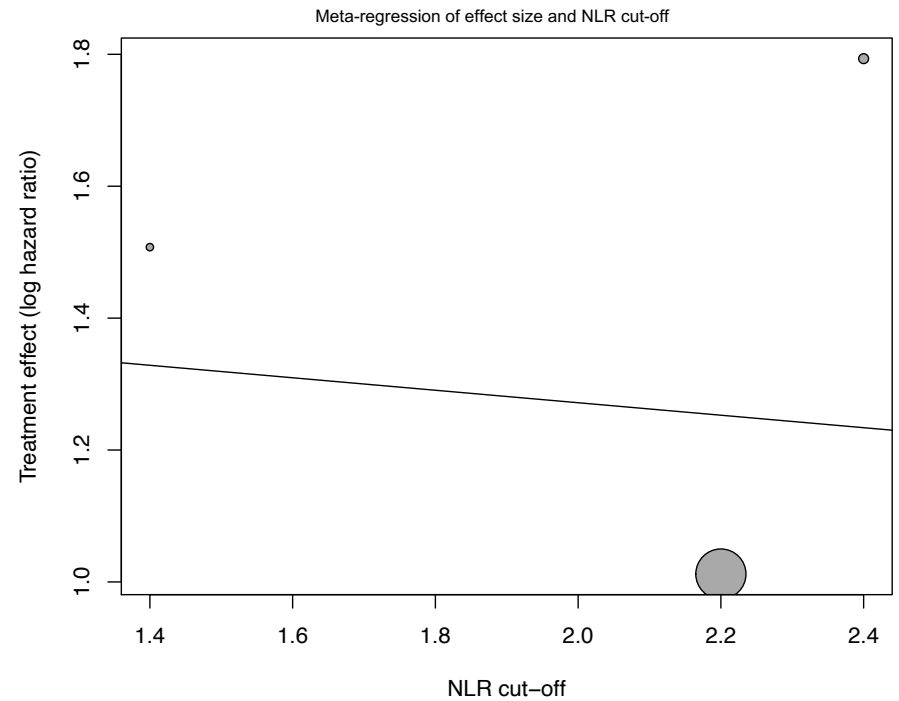

### Supplementary Figure 72 - NLR: OS in pancreatic neuroendocrine tumour

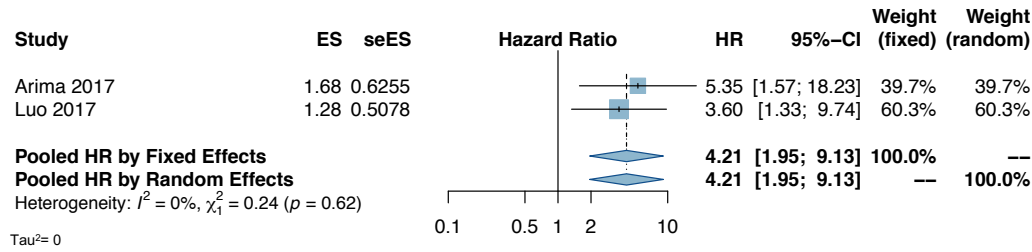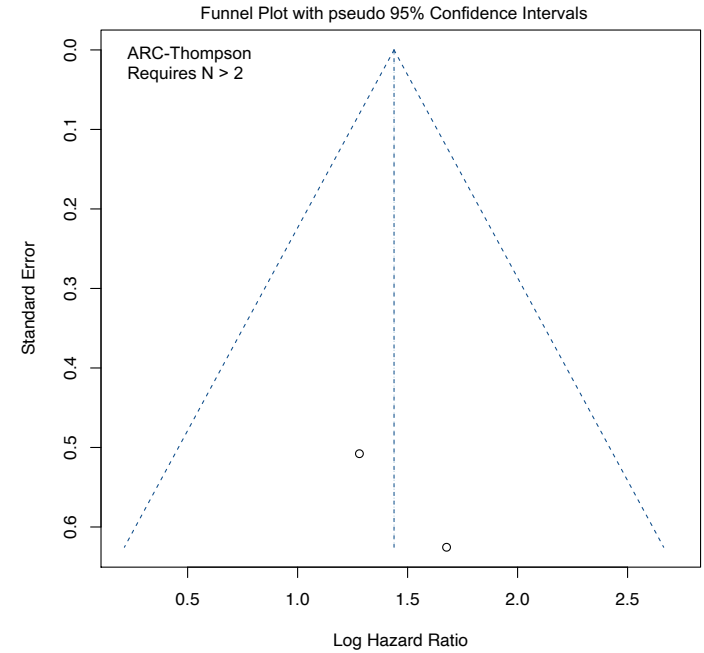

### Supplementary Figure 73 - NLR: RFS in pancreatic neuroendocrine tumour

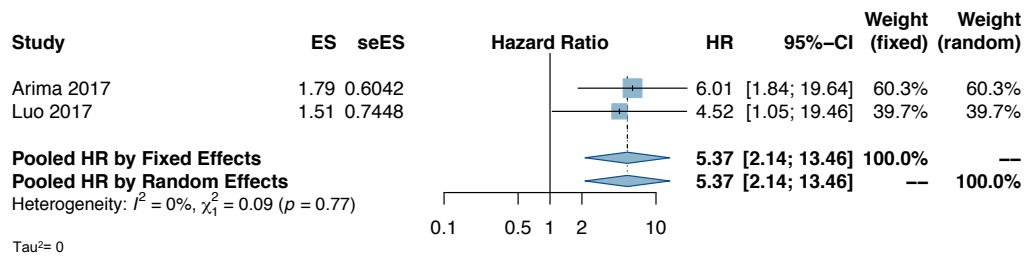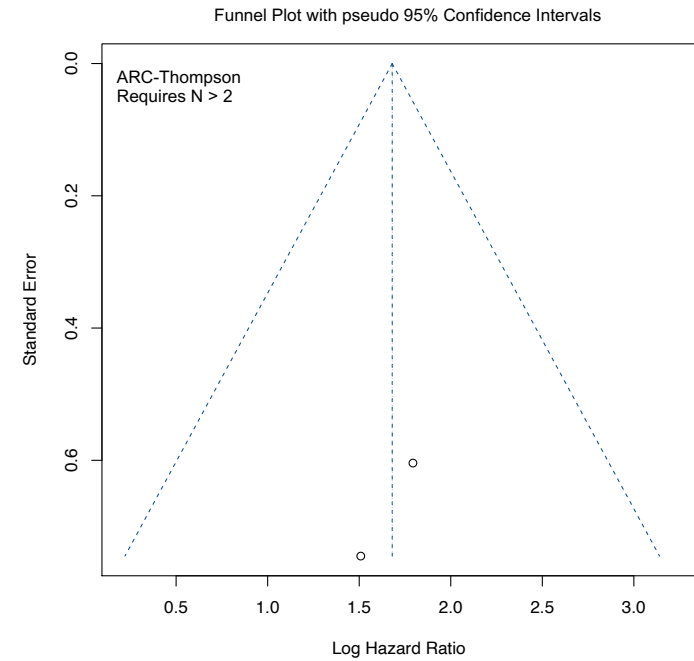

Supplementary Figure 74 – IN: OS in non-small cell lung cancer

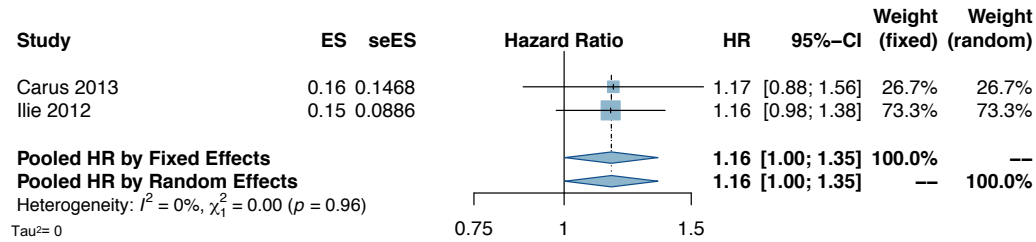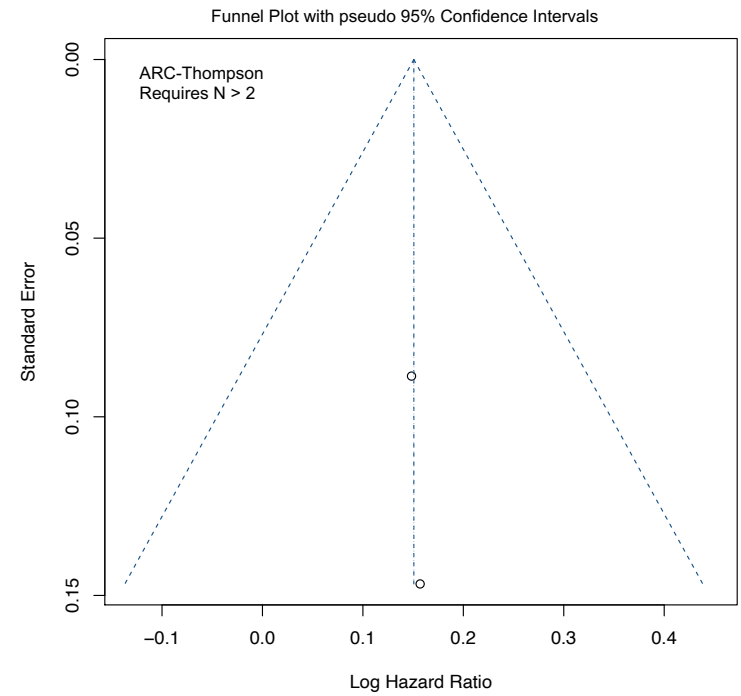

Supplementary Figure 75 - NLR: PFS in non-small cell lung cancer

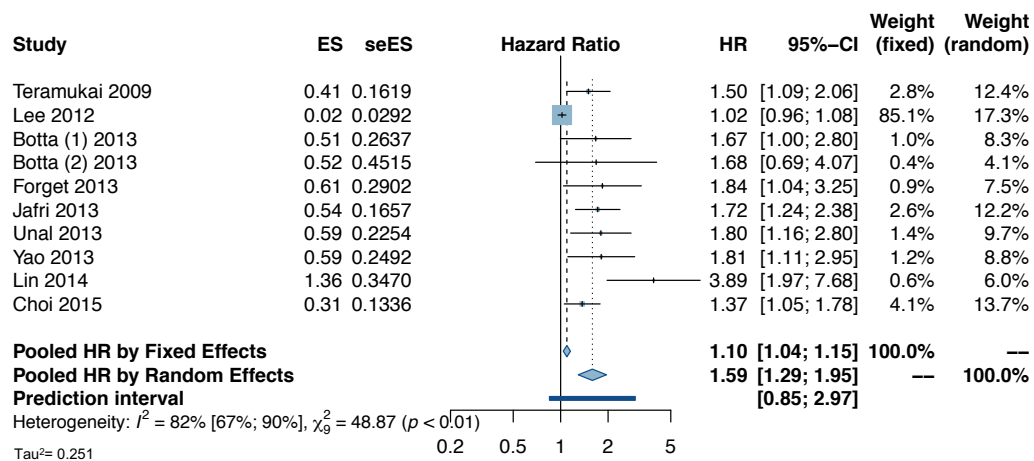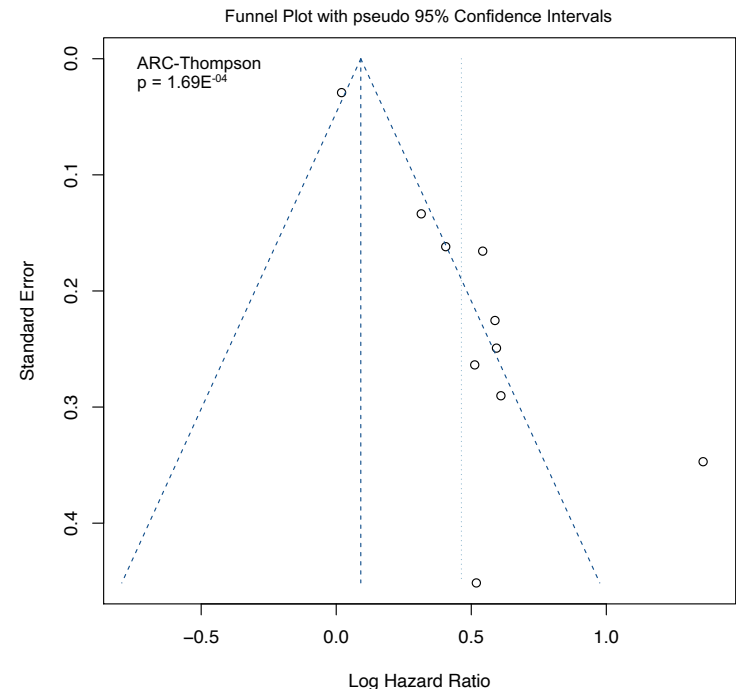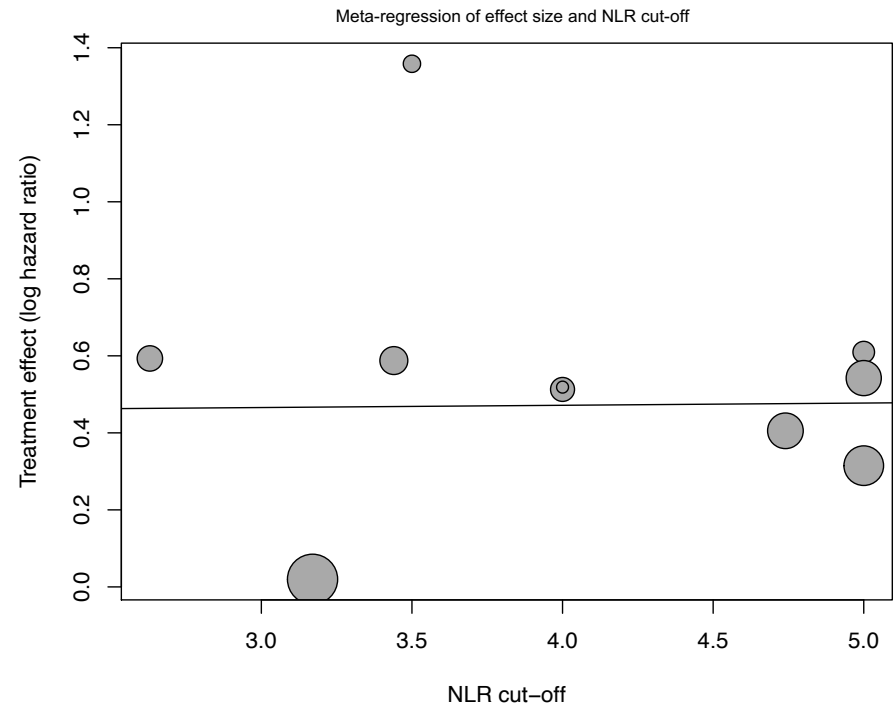

Supplementary Figure 76 – NLR: OS in lung cancer

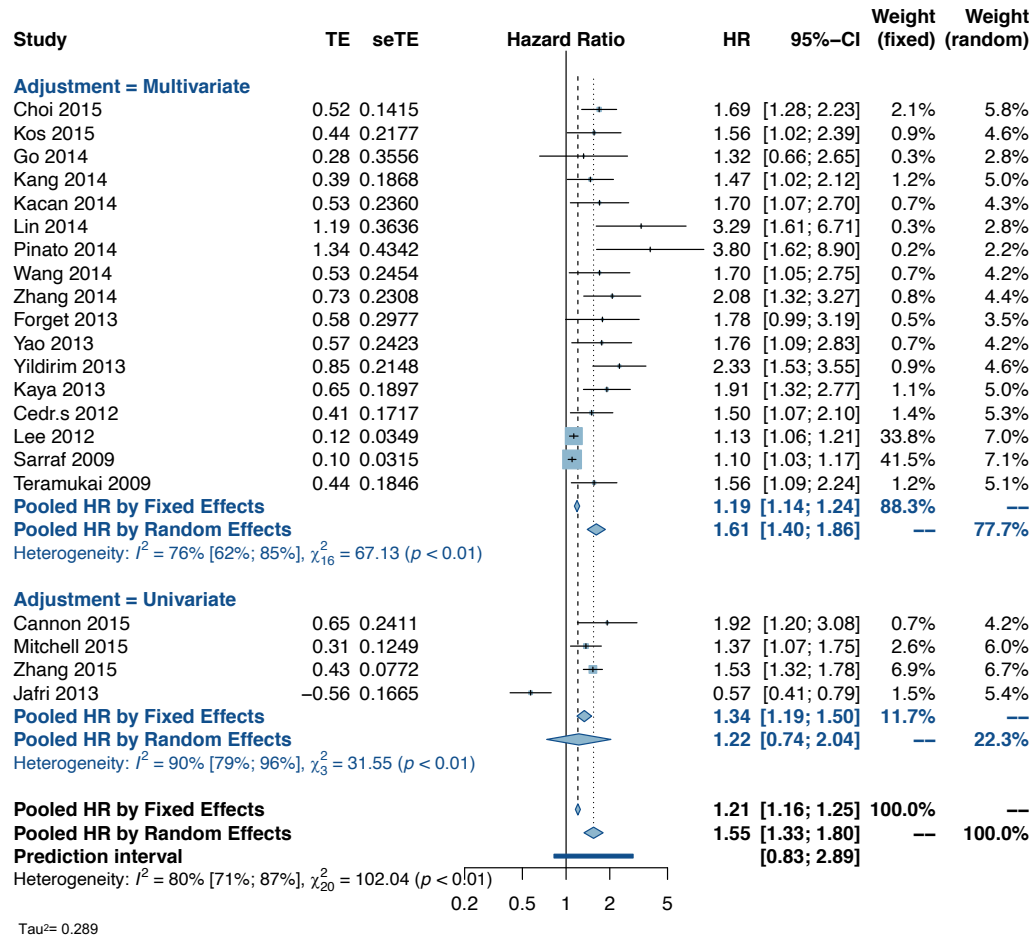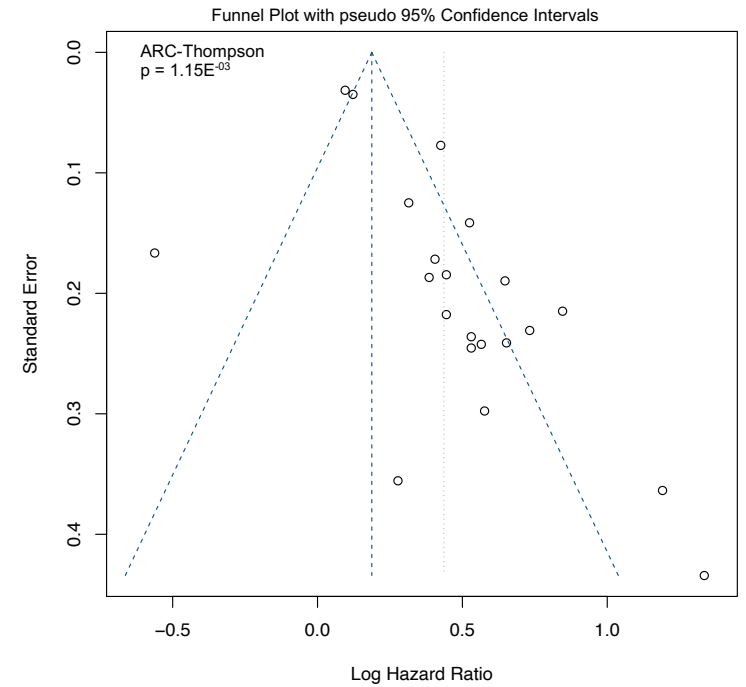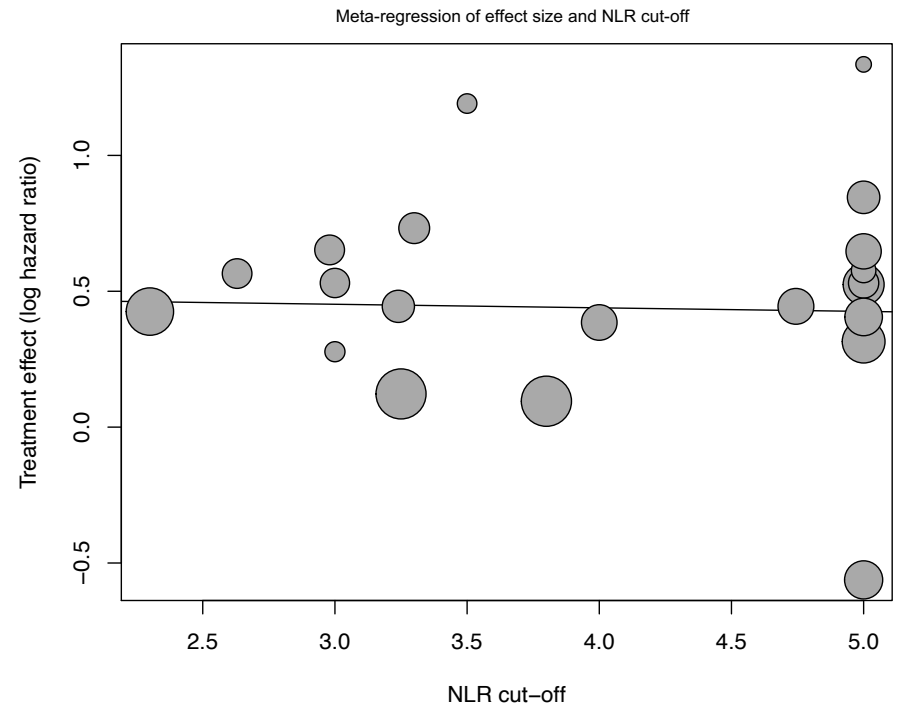

Supplementary Figure 77 – NLR: PFS in lung cancer

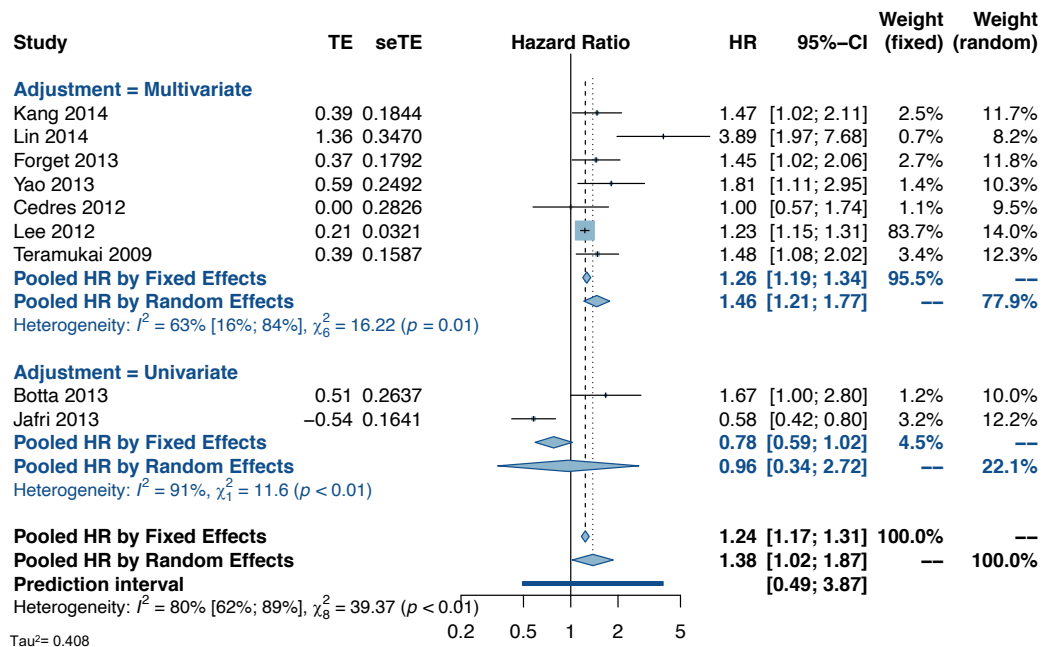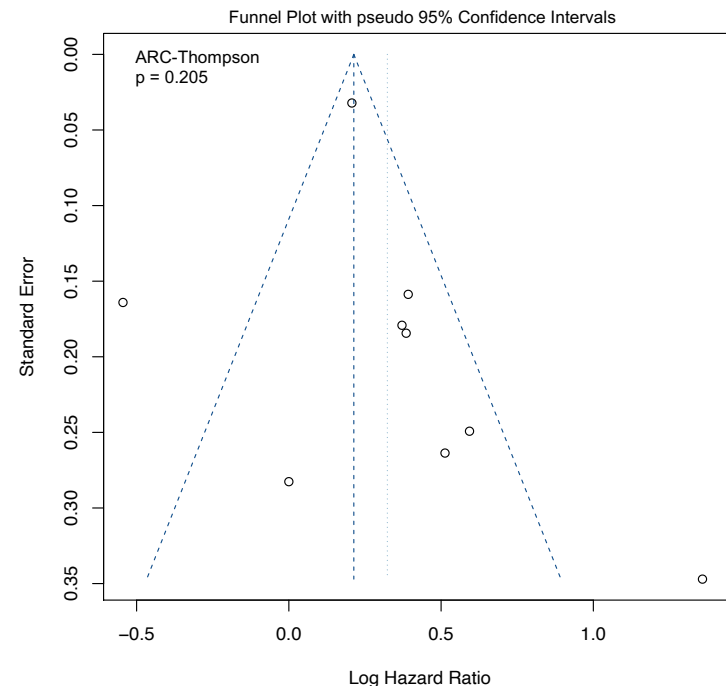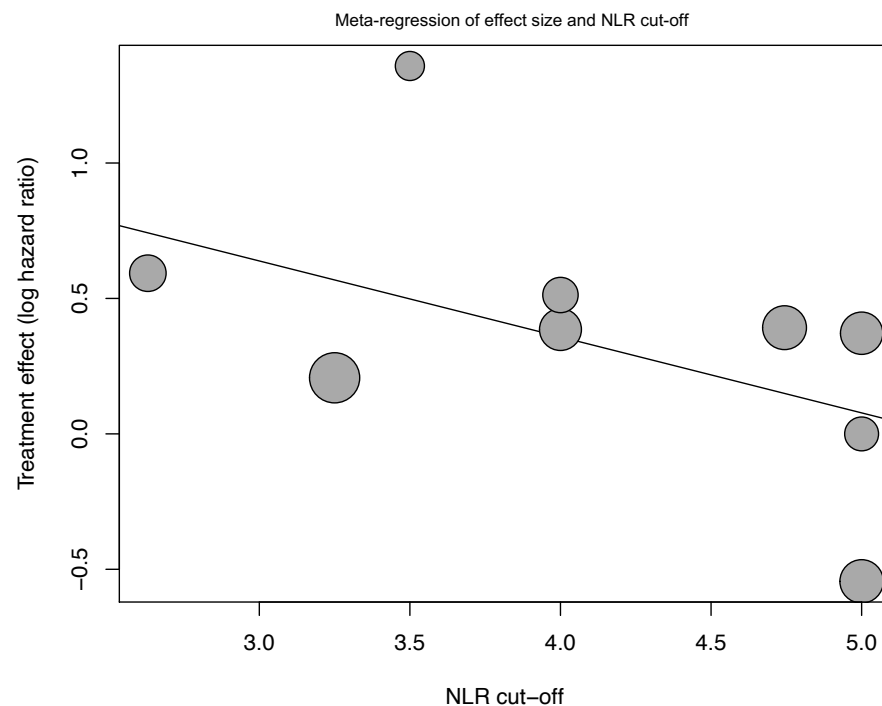

Supplementary Figure 78 – NLR: OS in lung cancer with surgery

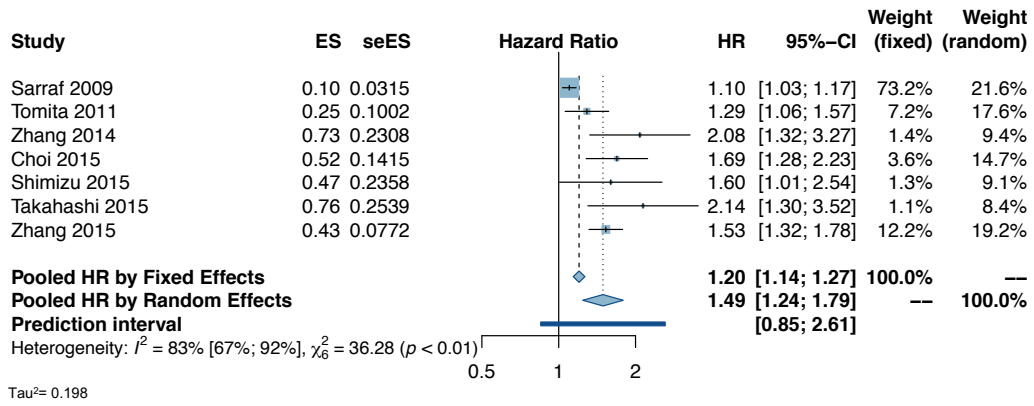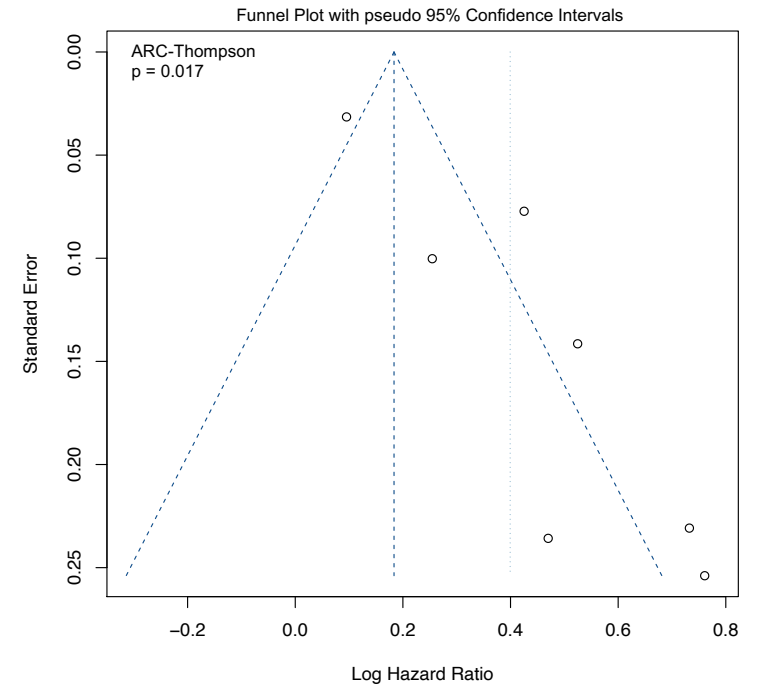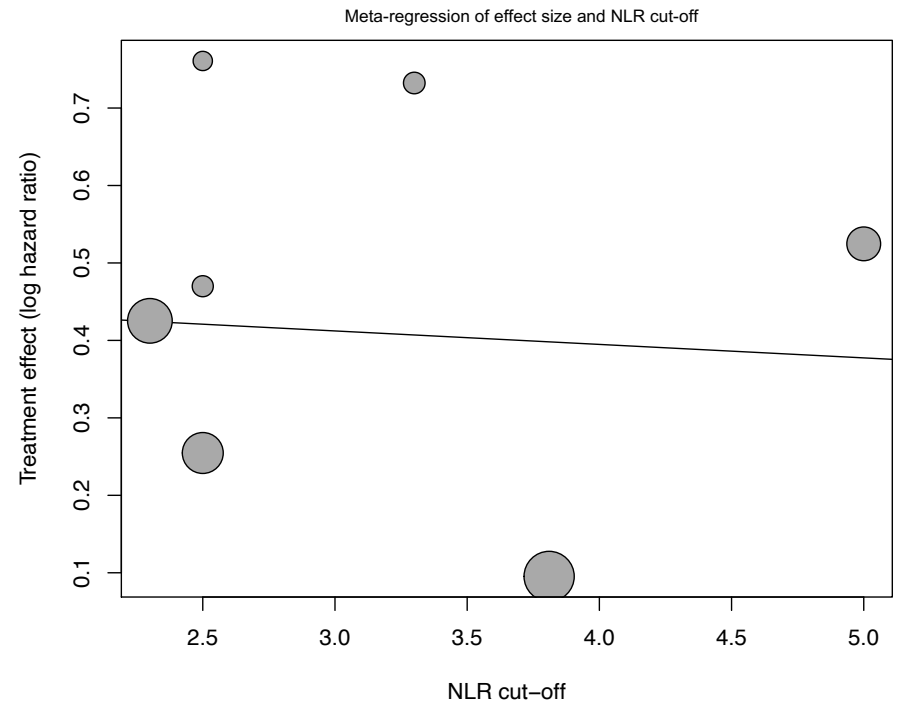

Supplementary Figure 79 - IN: OS in neck and head cancers

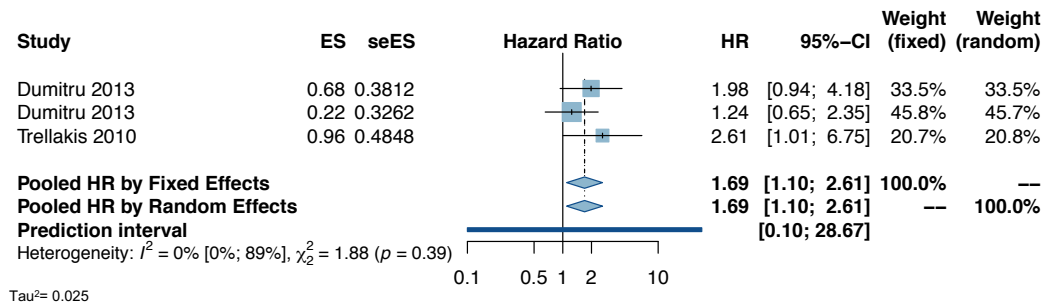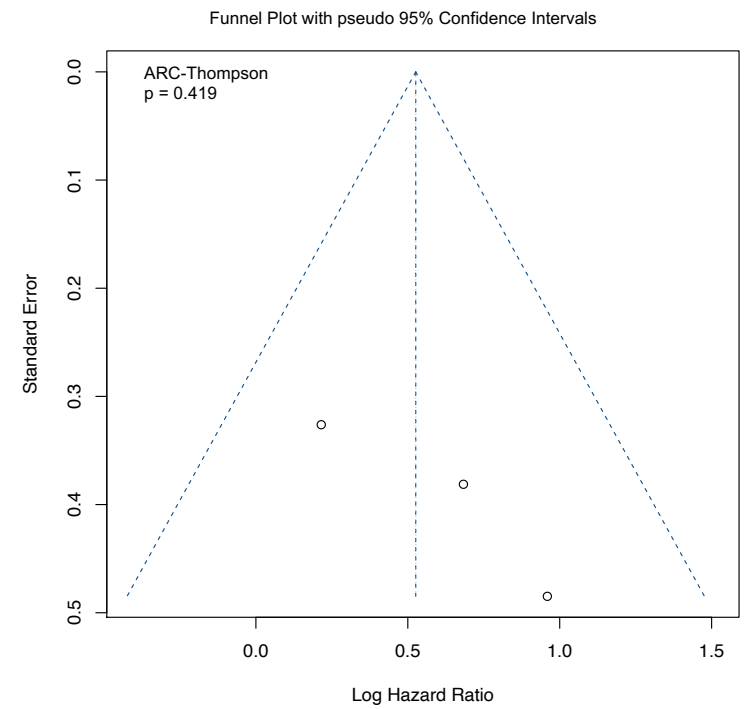



Supplementary Figure 80 - NLR: RFS in neck and head cancers

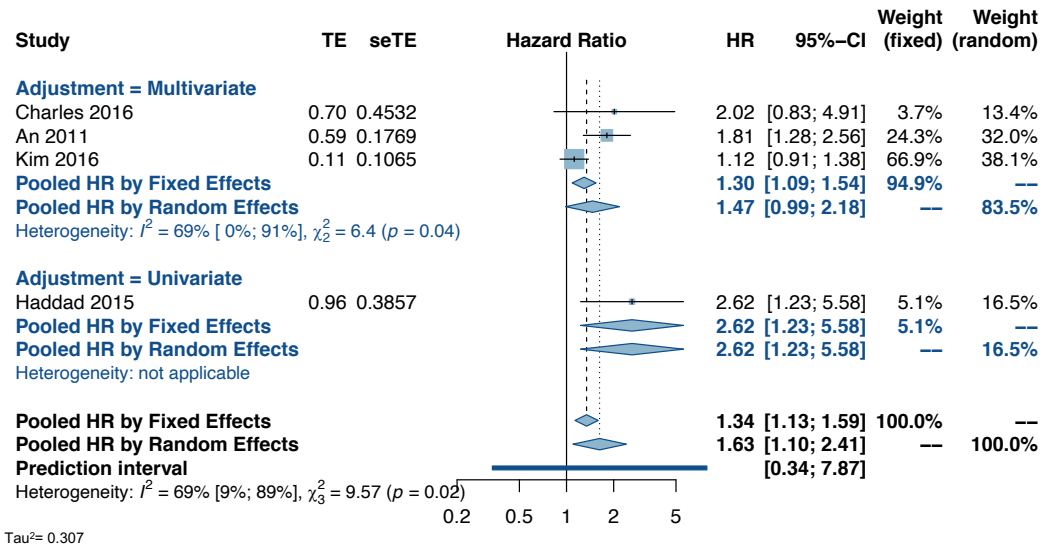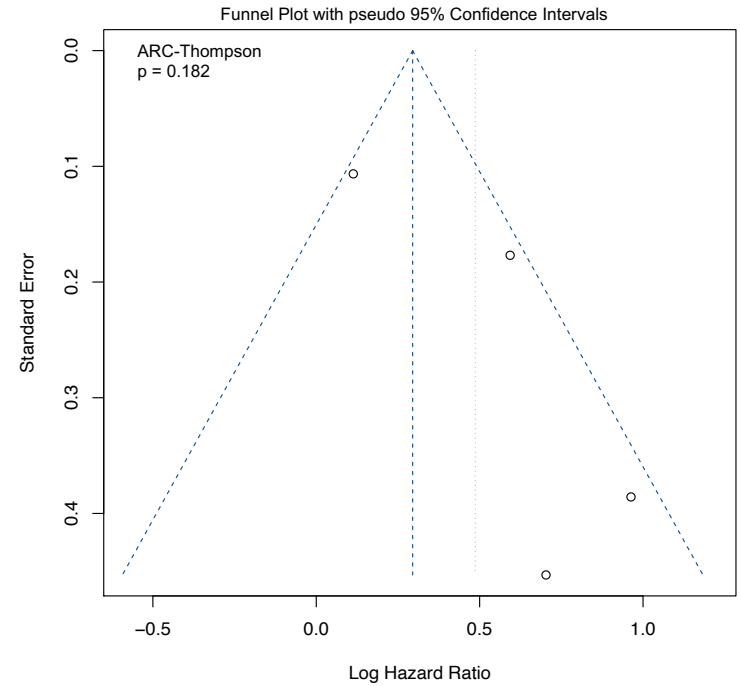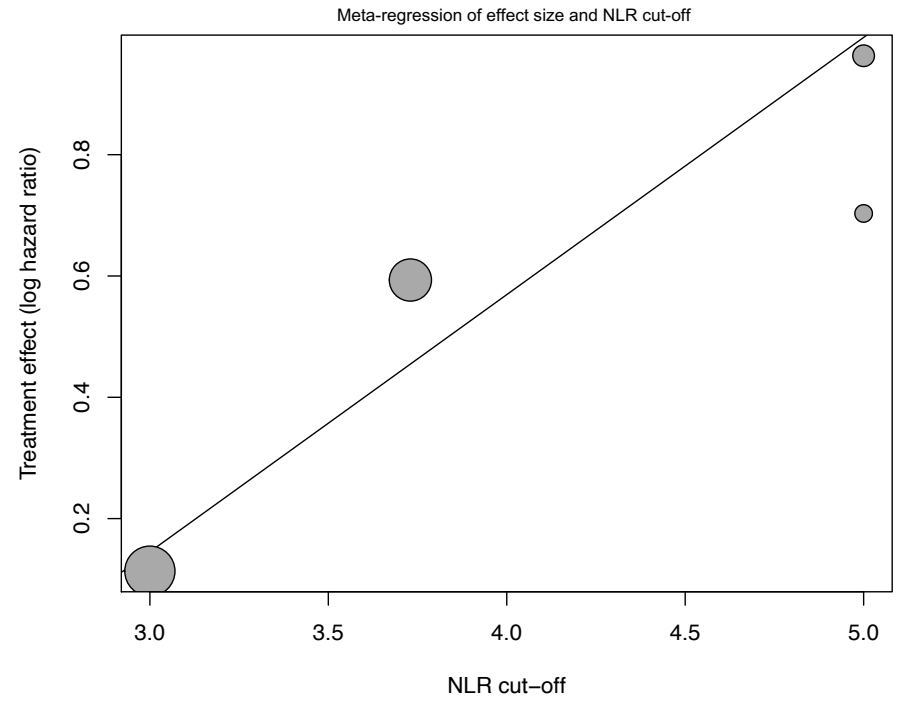

Supplementary Figure 81 - NLR: OS in larynx cancer

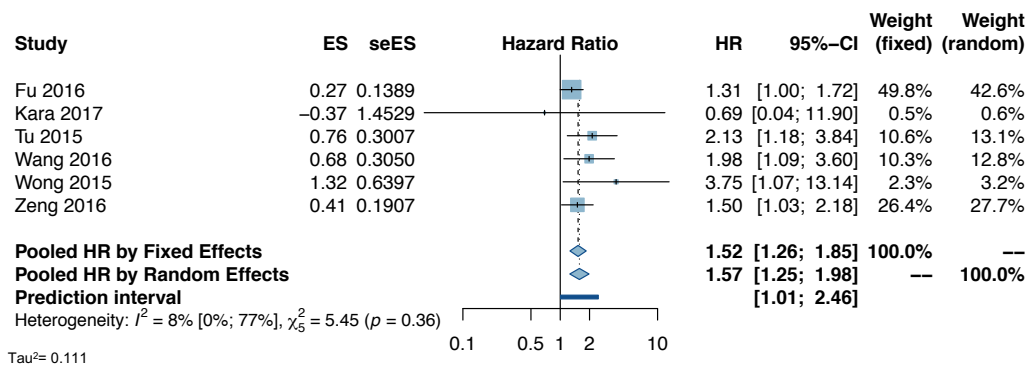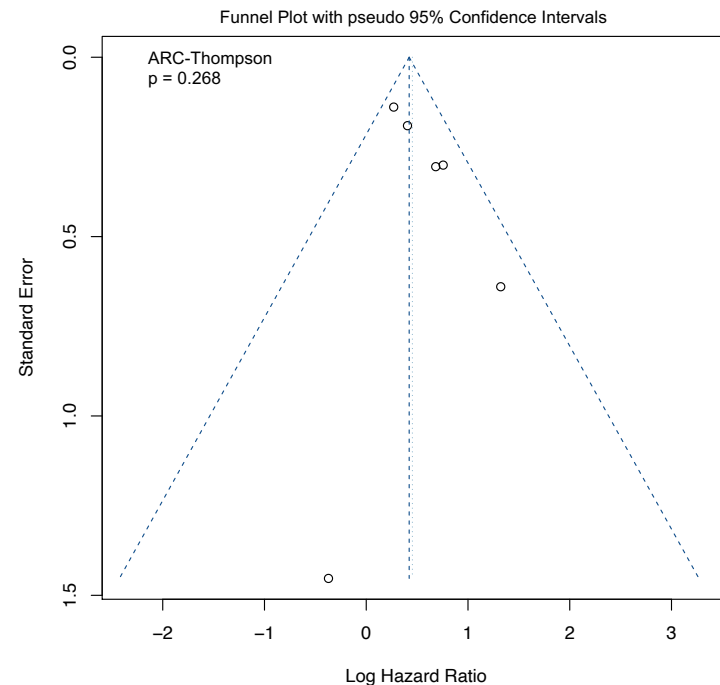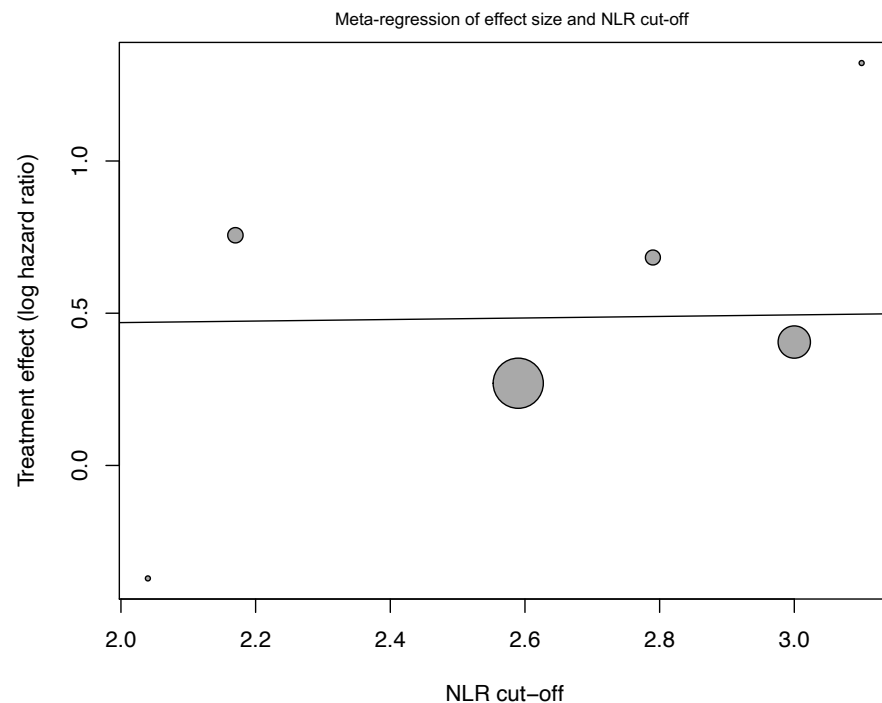

## Supplementary Figure 82 - NLR: PFS in nasopharyngeal cancer

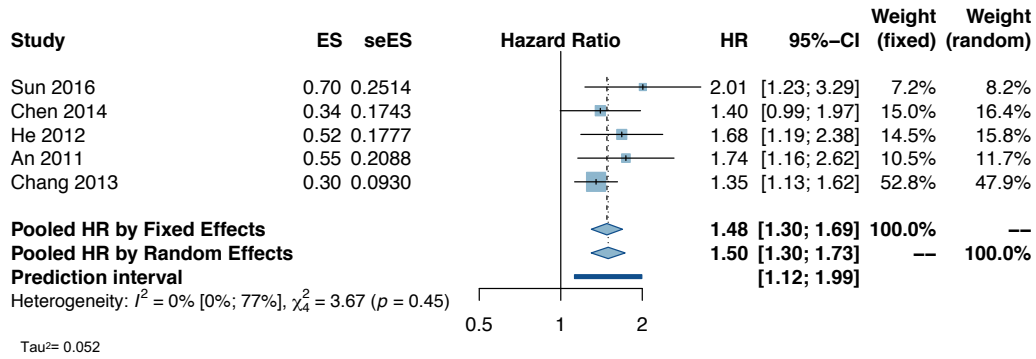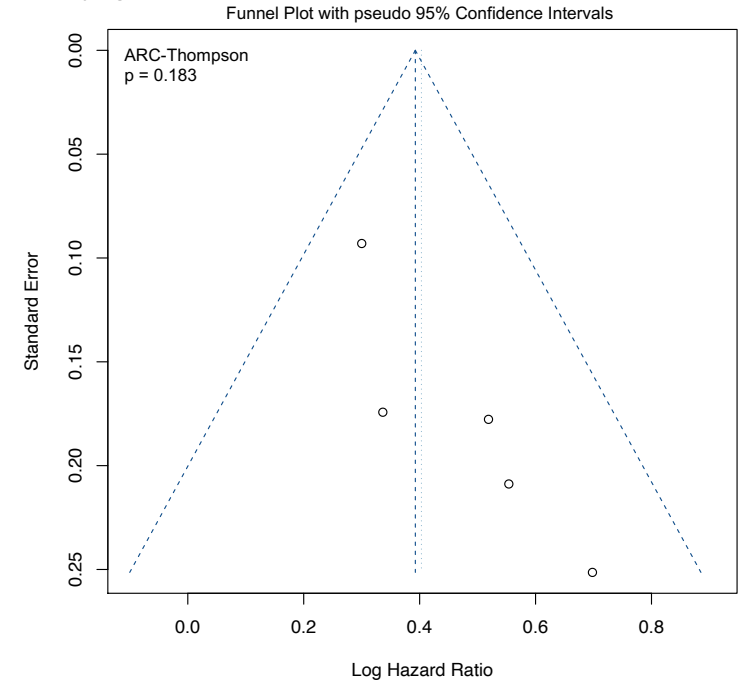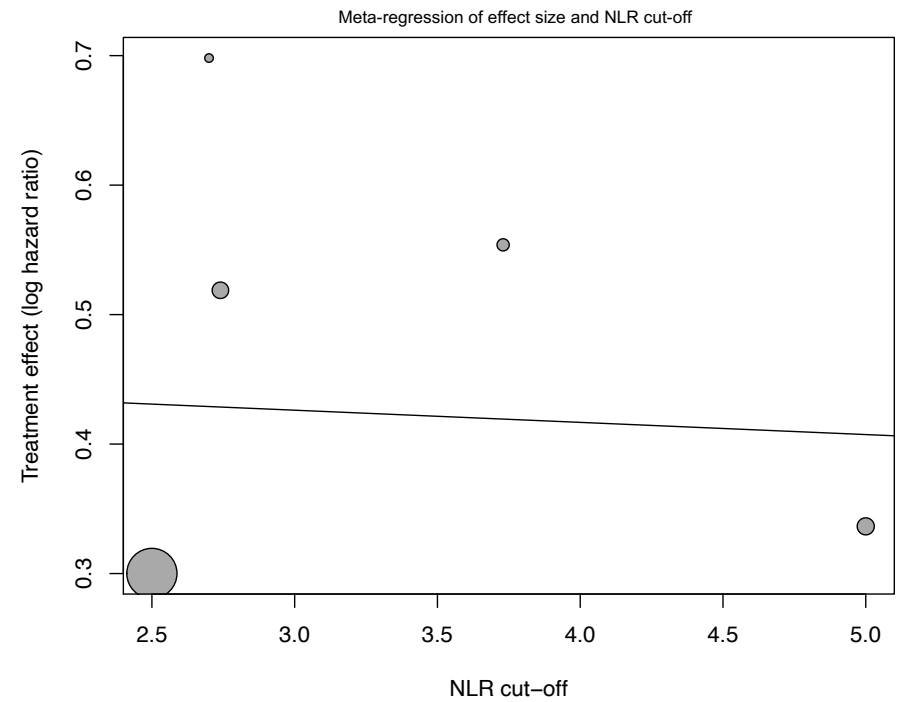

Supplementary Figure 83 - NLR: CSS in nasopharyngeal cancer

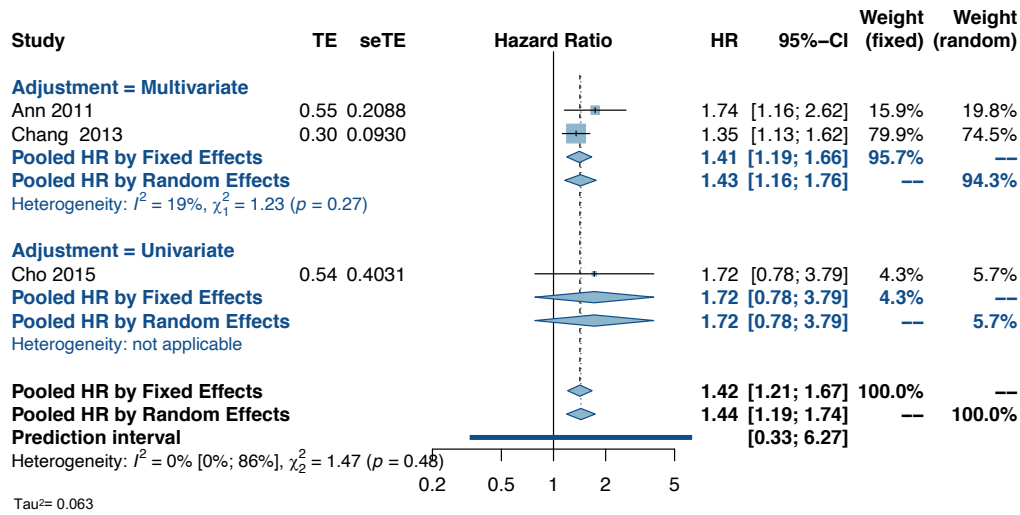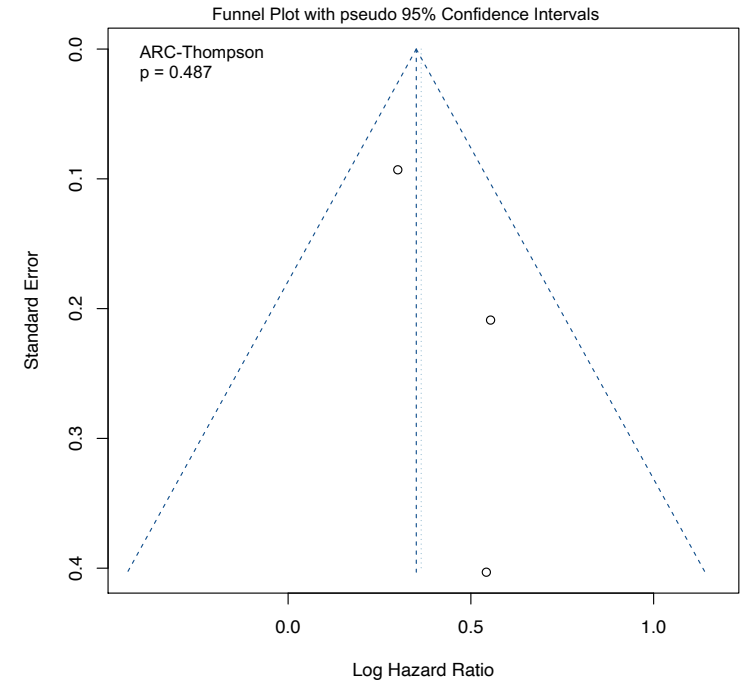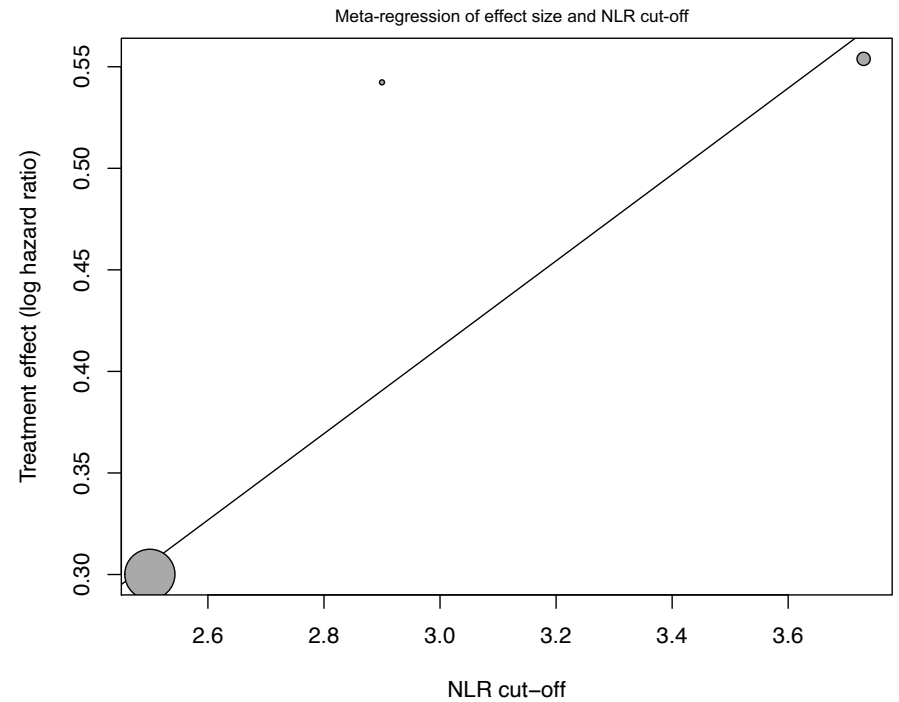

Supplementary Figure 84 - NLR: OS in oral squamous cell carcinoma

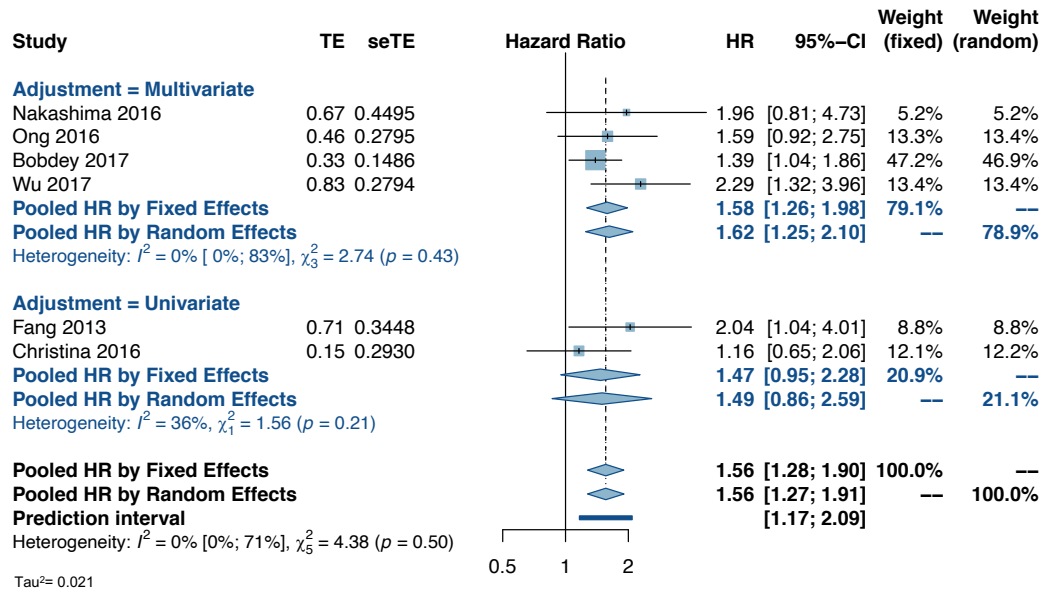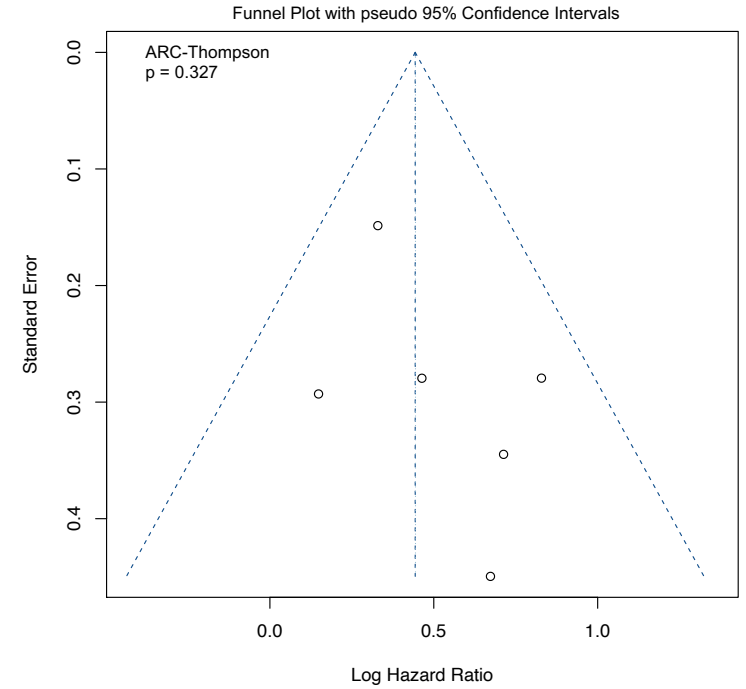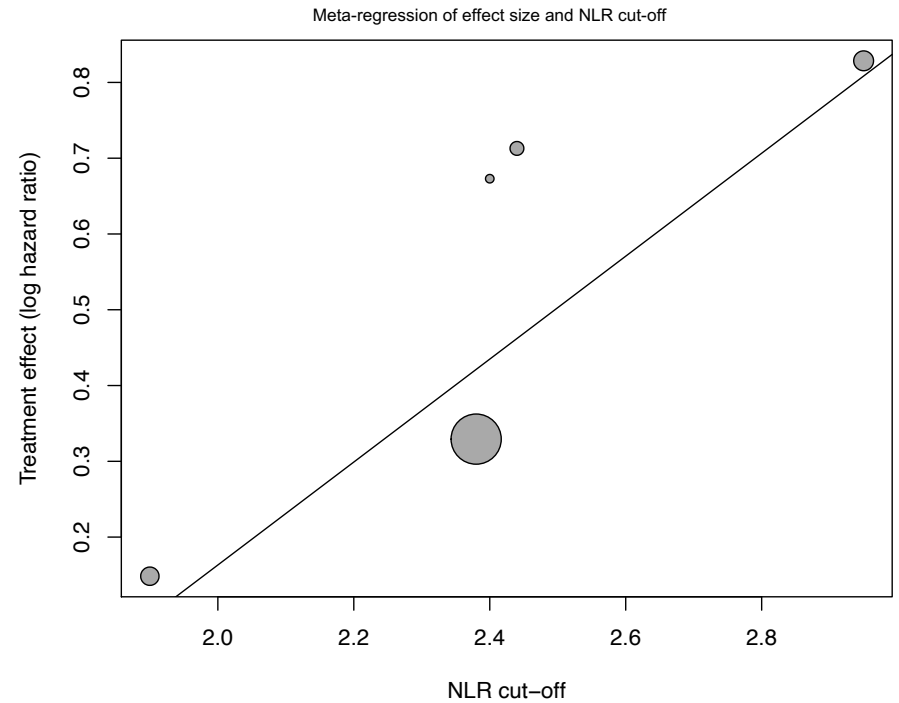

Supplementary Figure 85 - NLR: DFS in oral squamous cell carcinoma

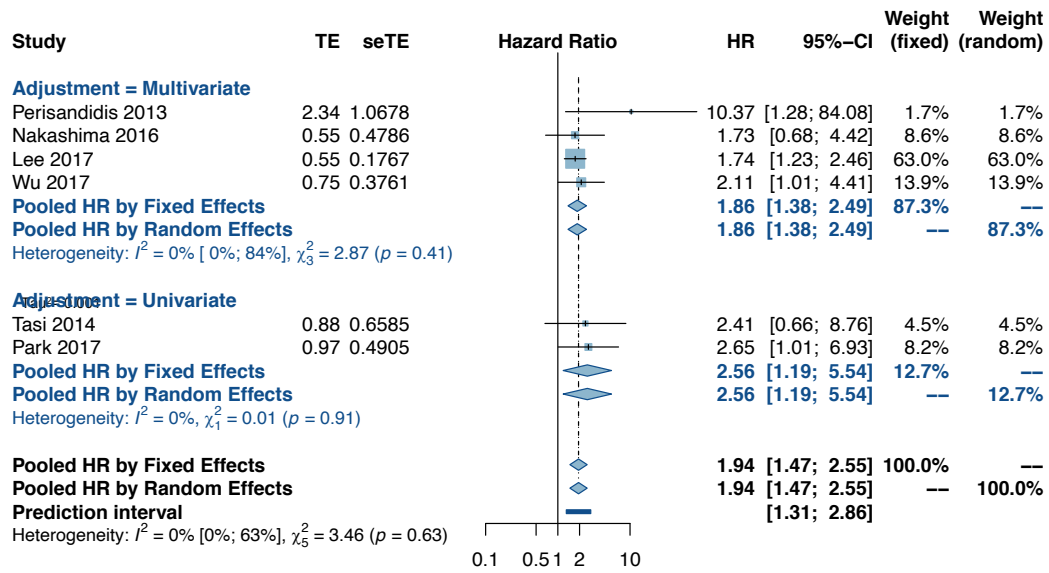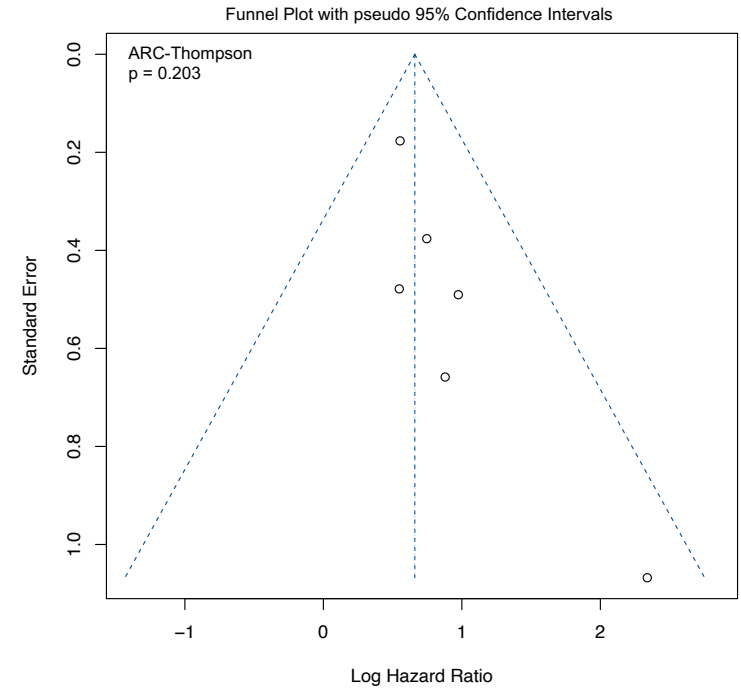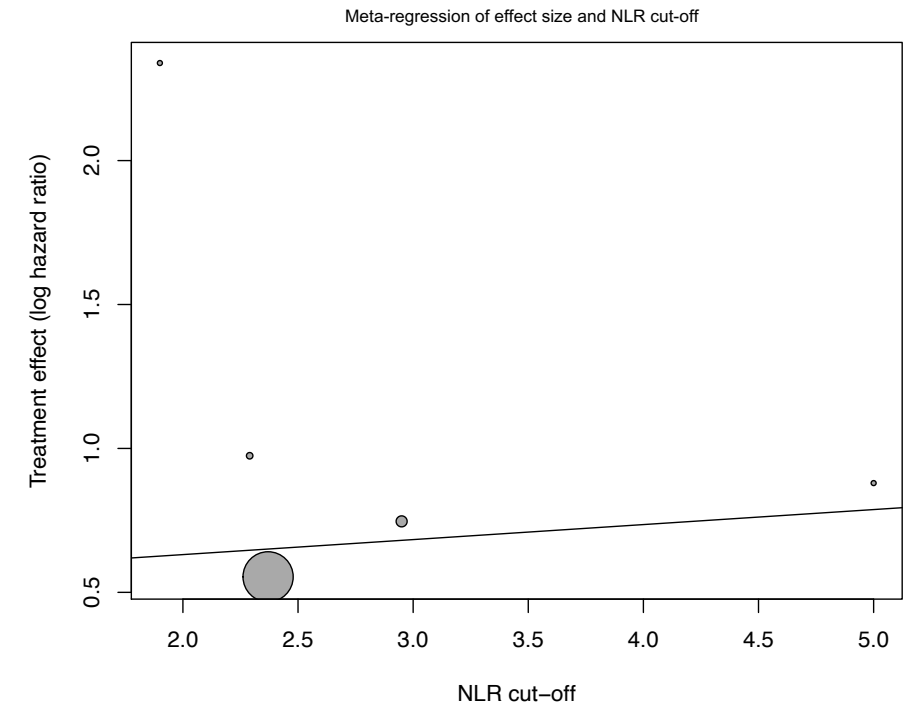

Supplementary Figure 86 - NLR: OS in malignant pleural mesothelioma

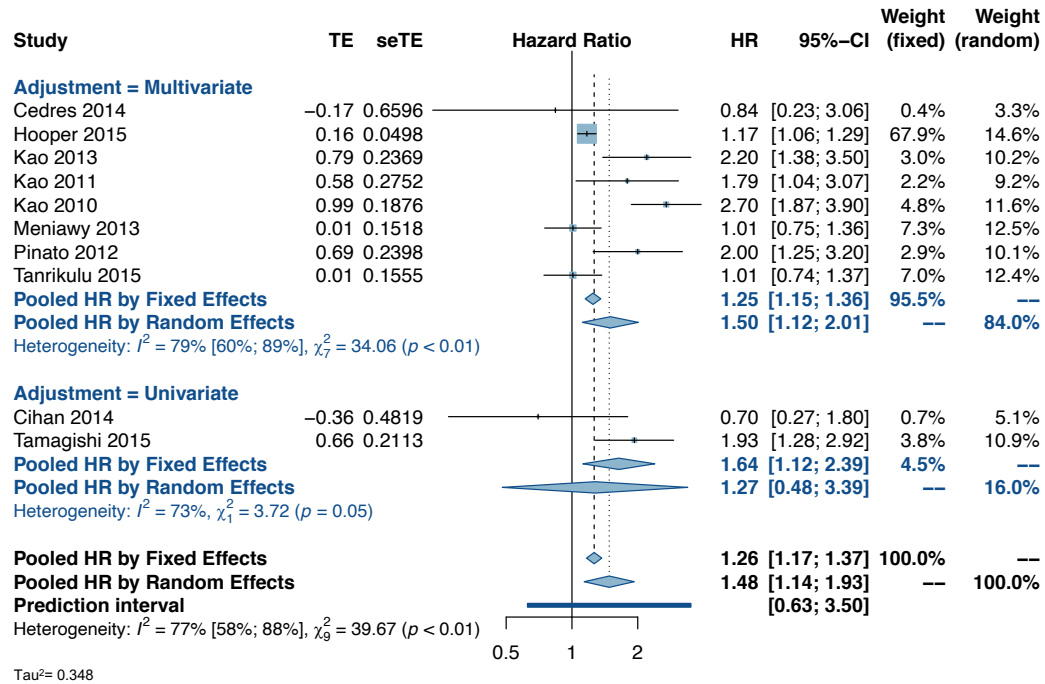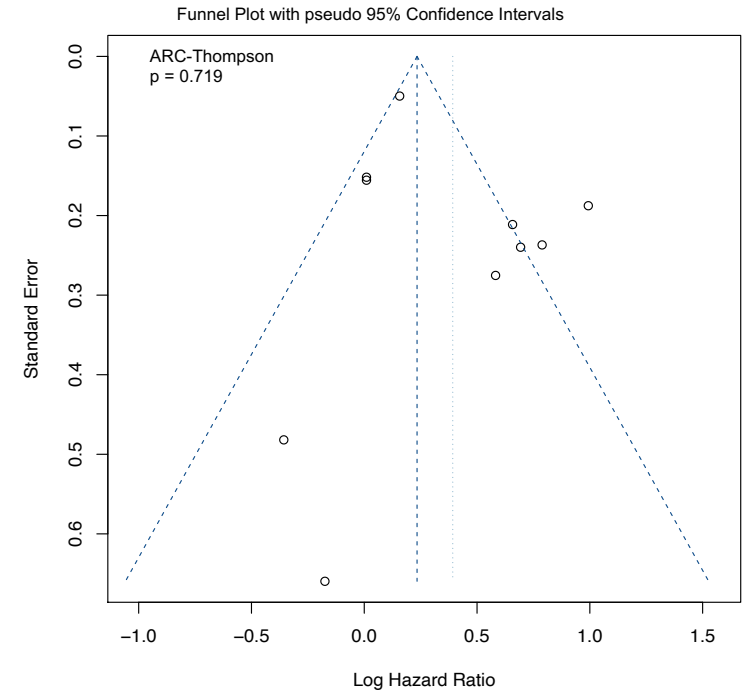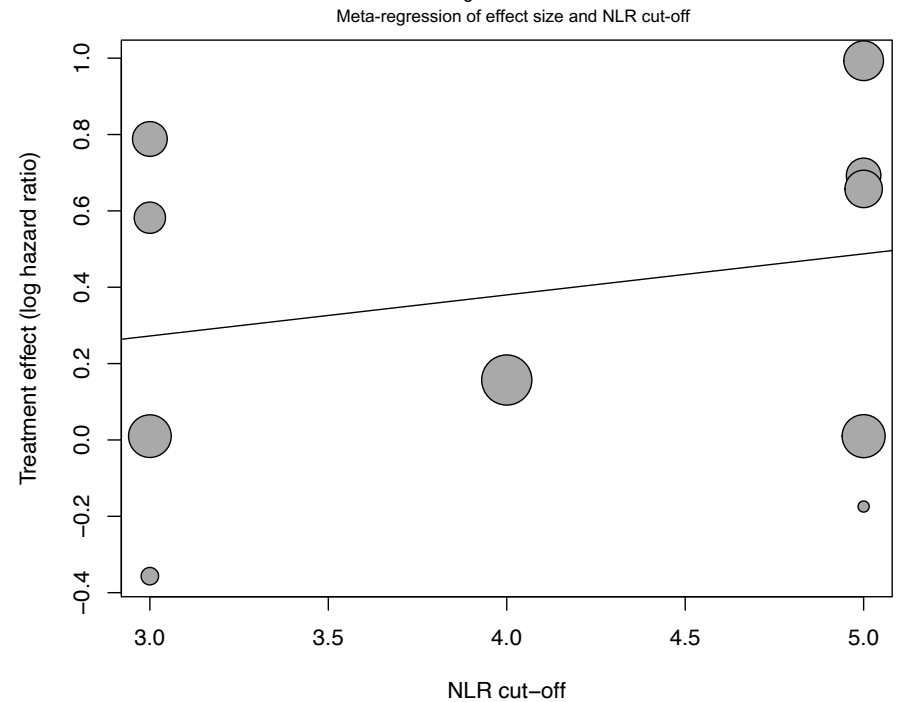

### Supplementary Figure 87 - NLR: OS in melanoma

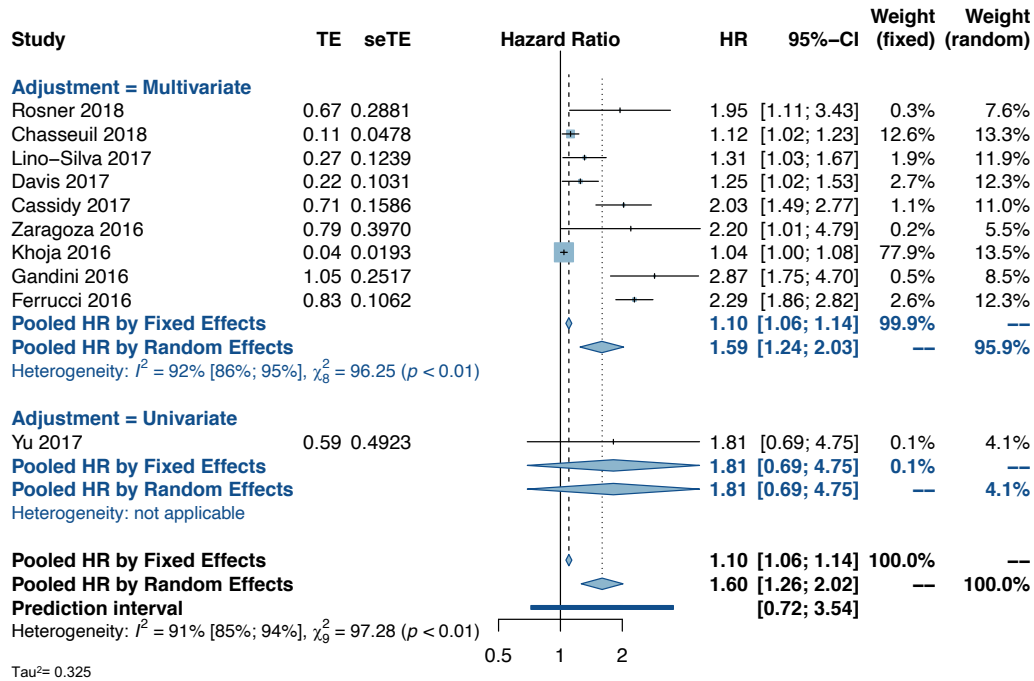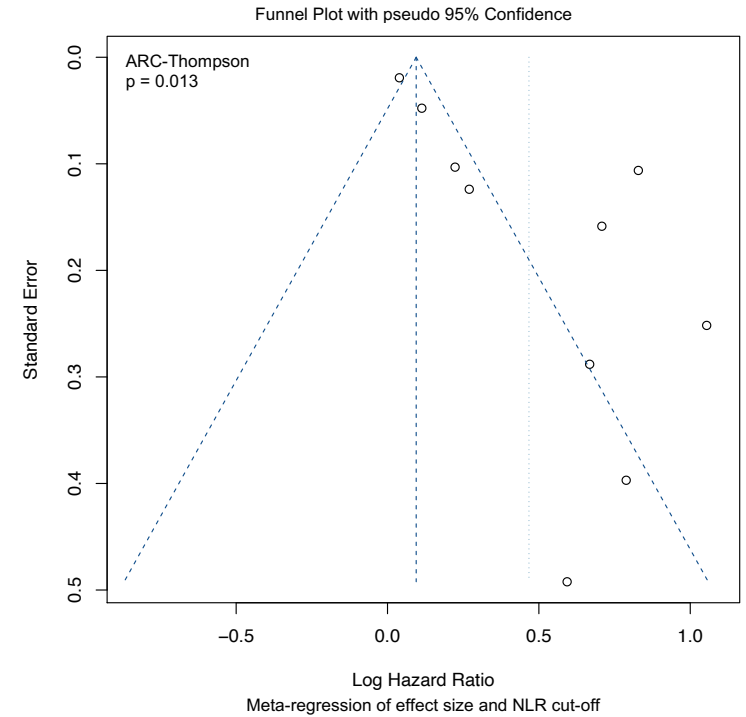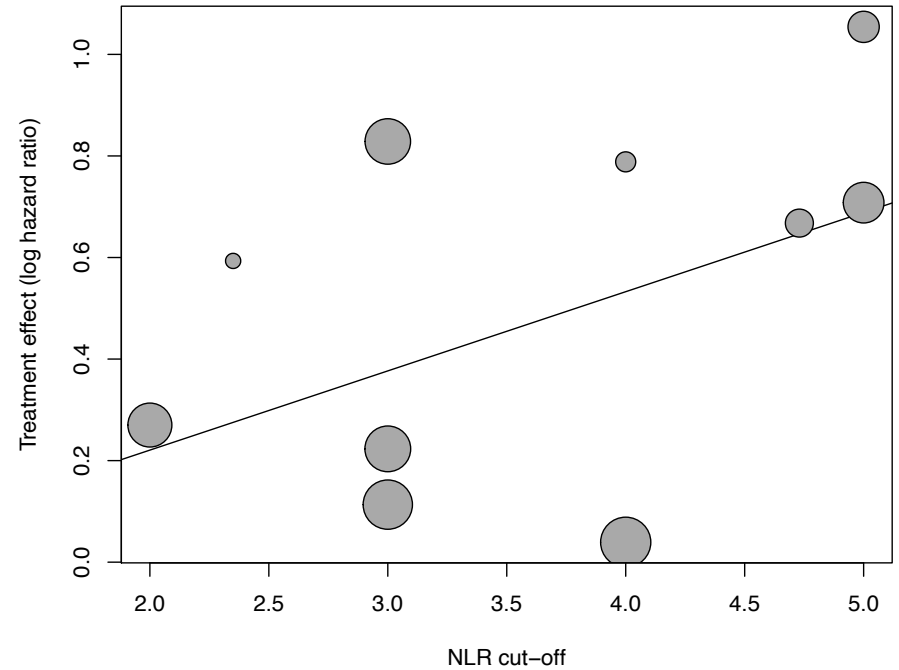



Supplementary Figure 88 - NLR: PFS in melanoma

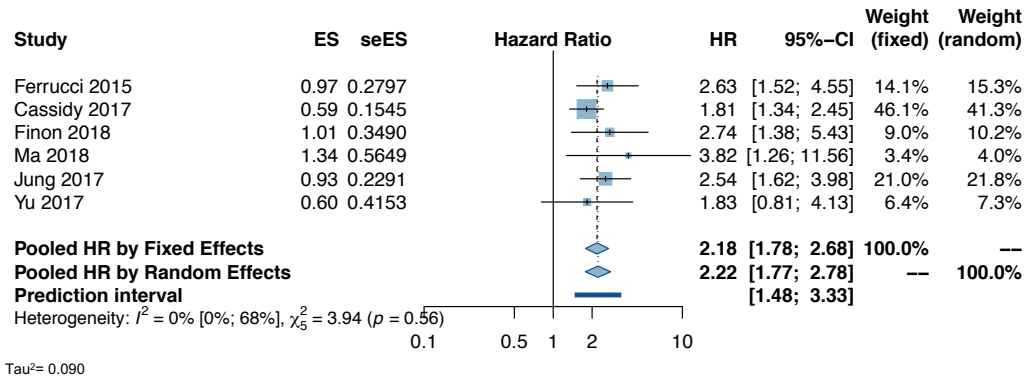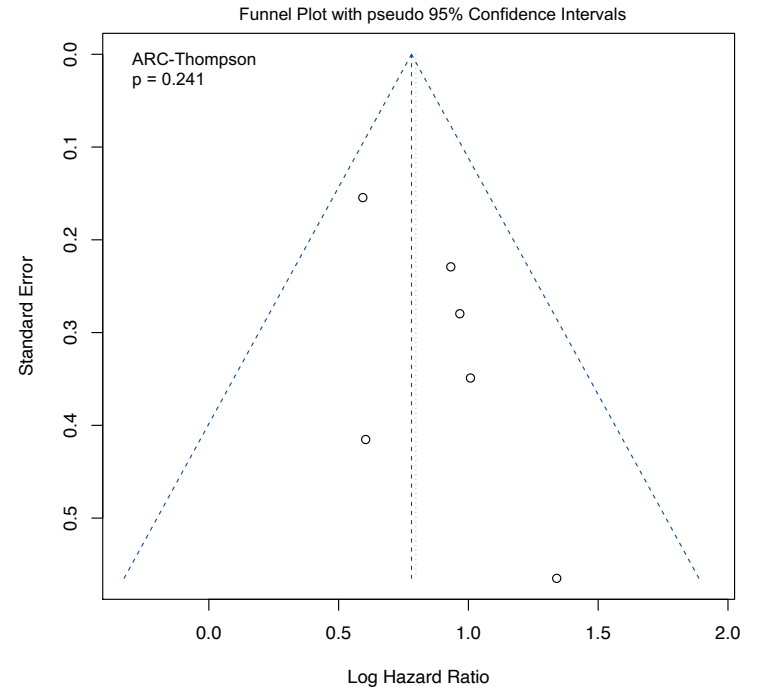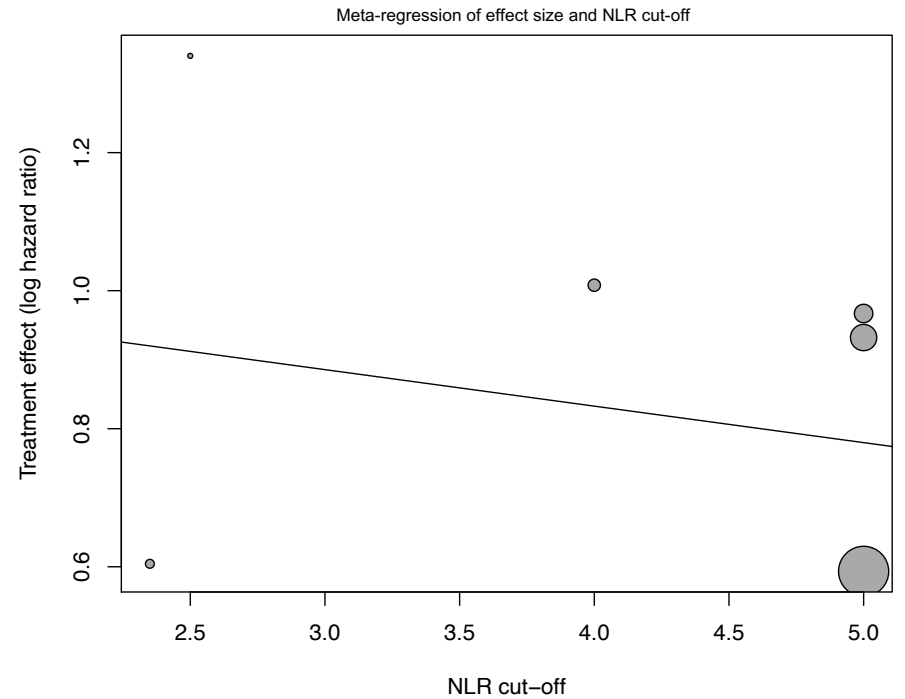

Supplementary Figure 89 – IN: OS in renal cancer

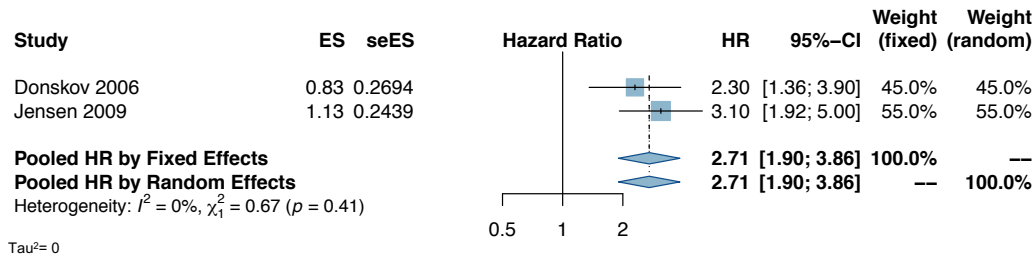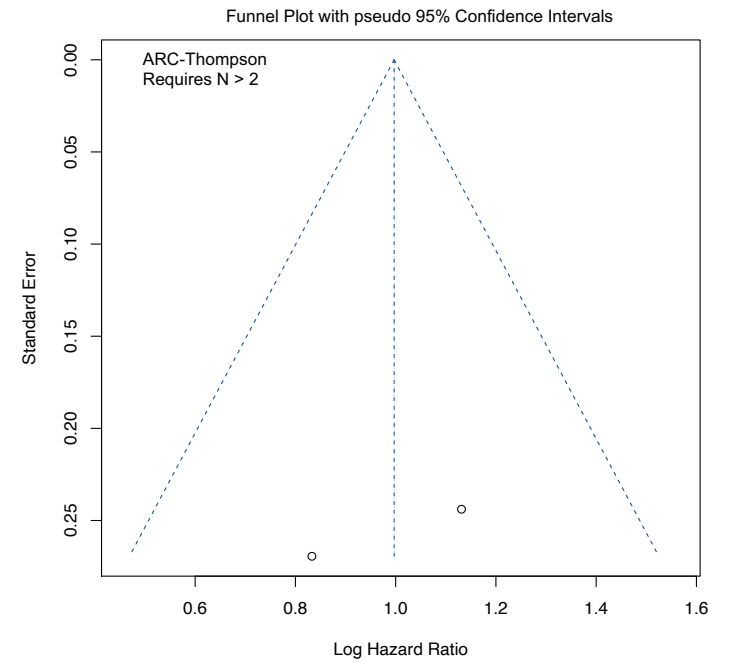

Supplementary Figure 90 - NLR: OS in renal cancer

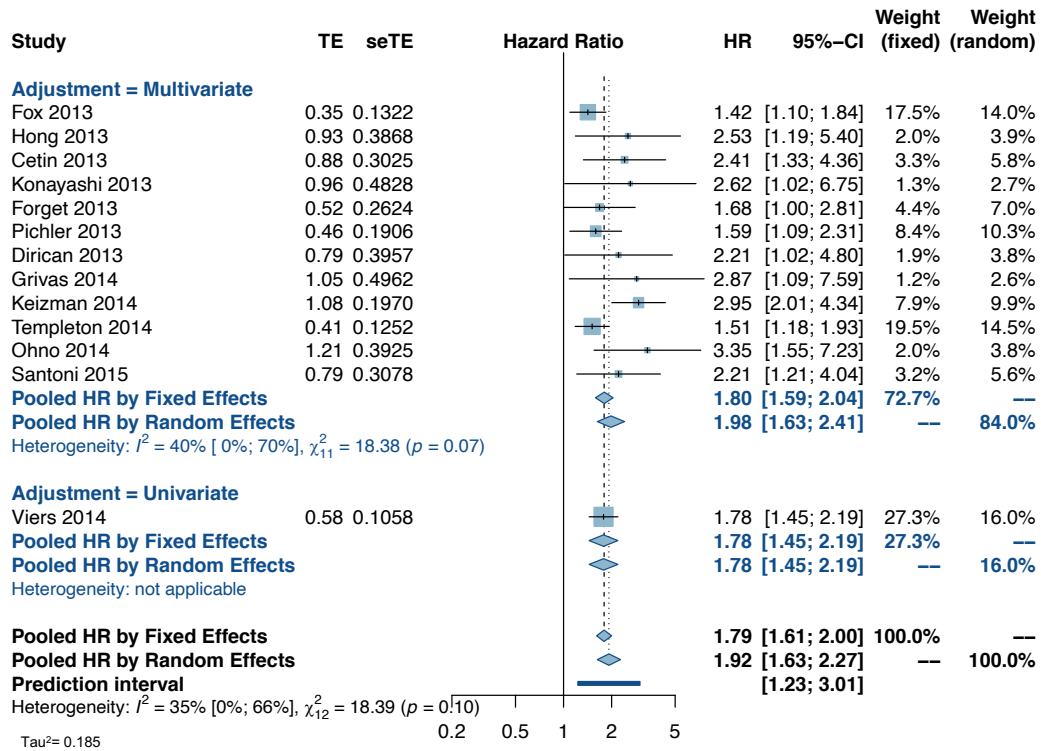

Tau<sup>2</sup> = 0.185

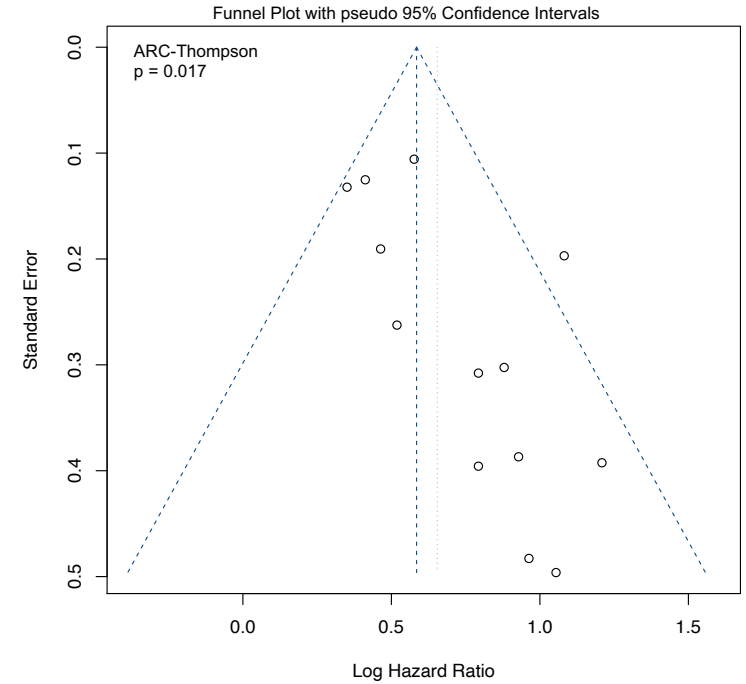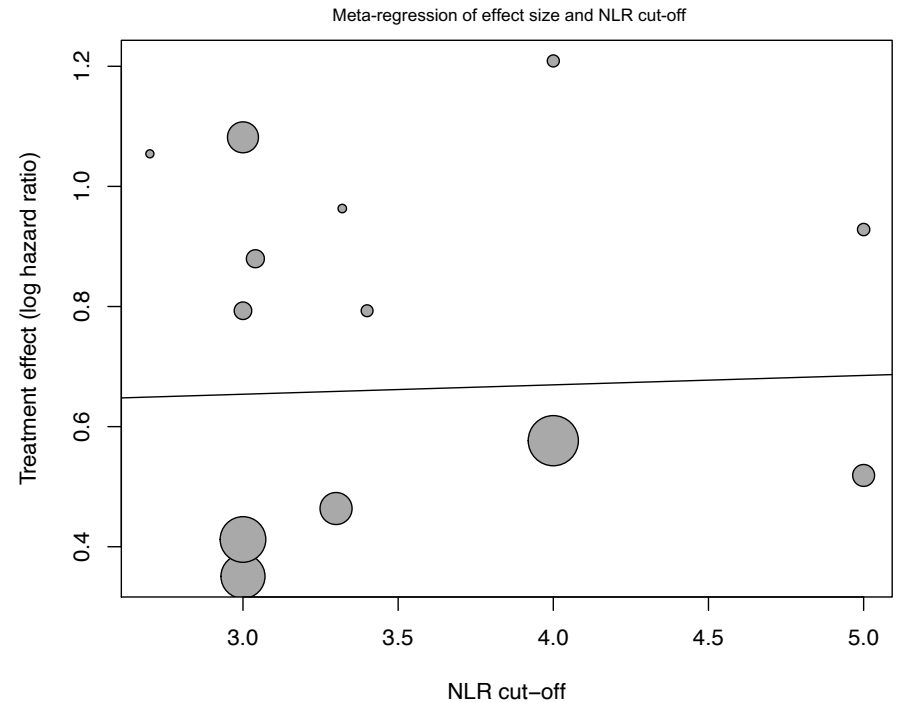

Supplementary Figure 91 - NLR: OS in advanced renal cancer

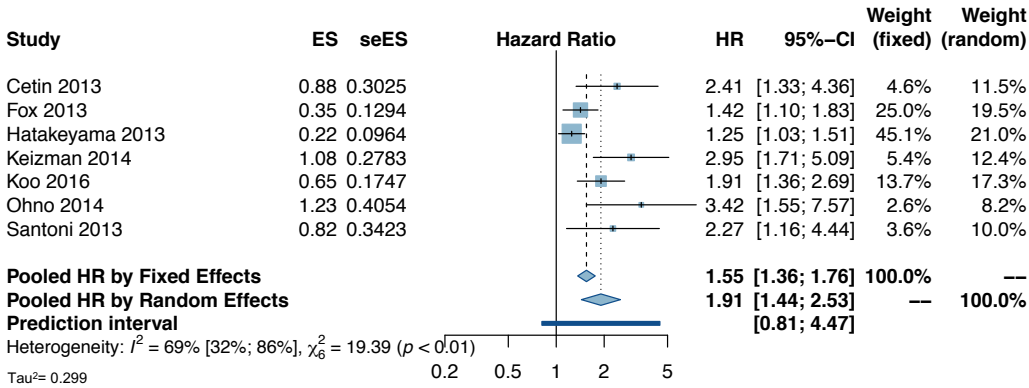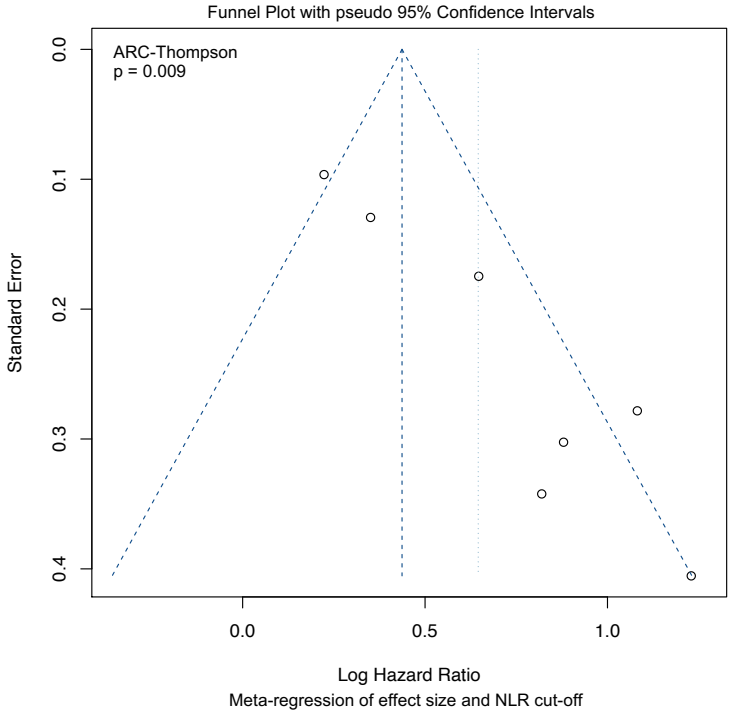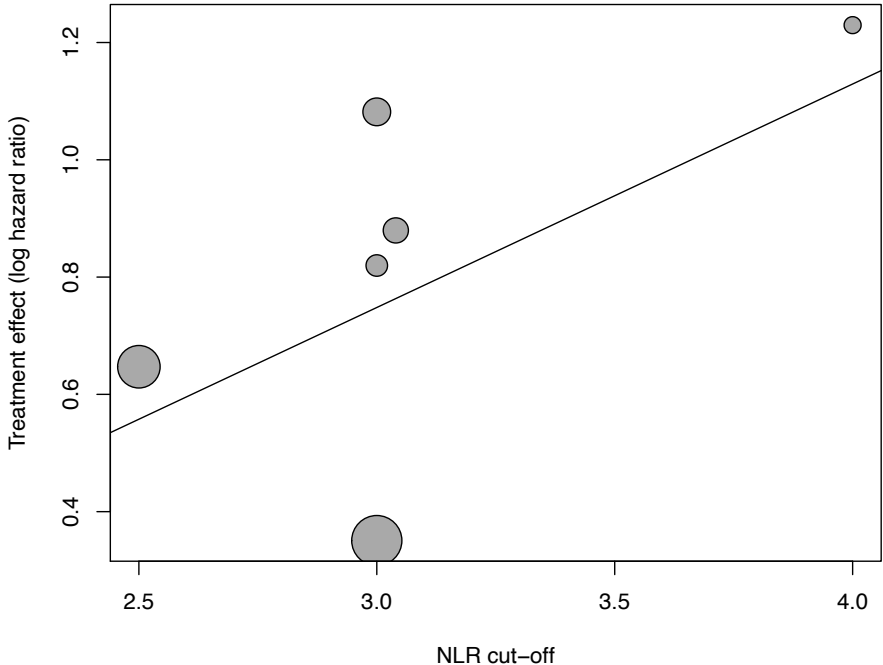

Supplementary Figure 92 - NLR: OS in localised renal cancer

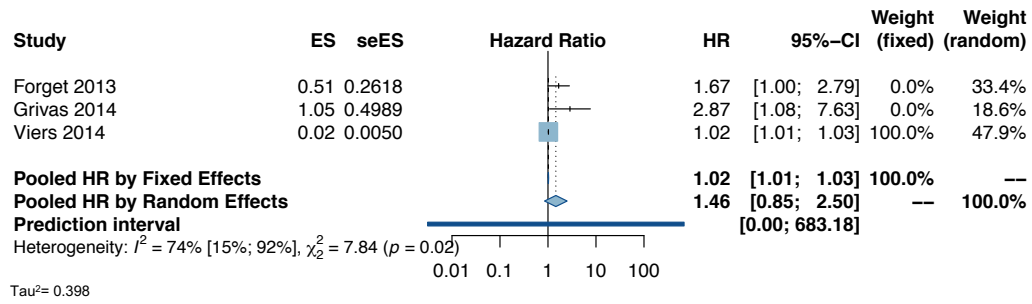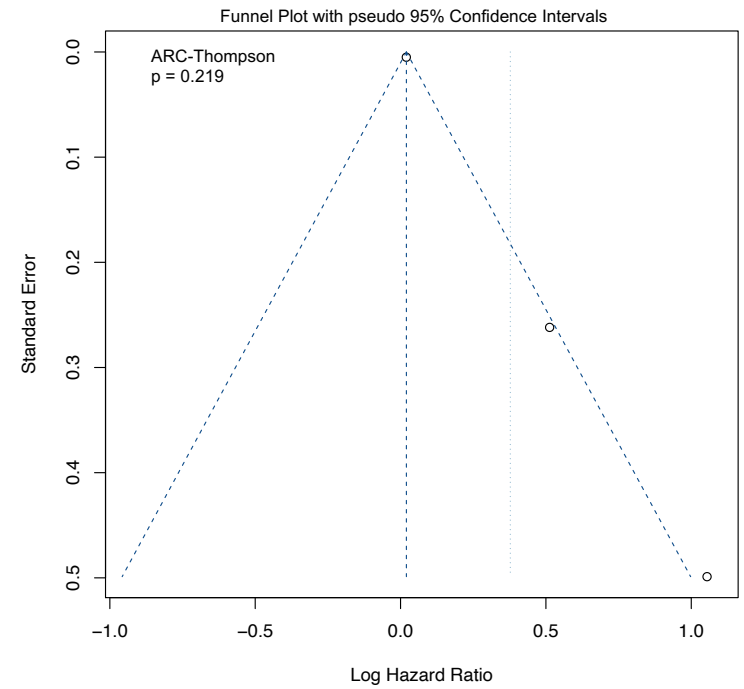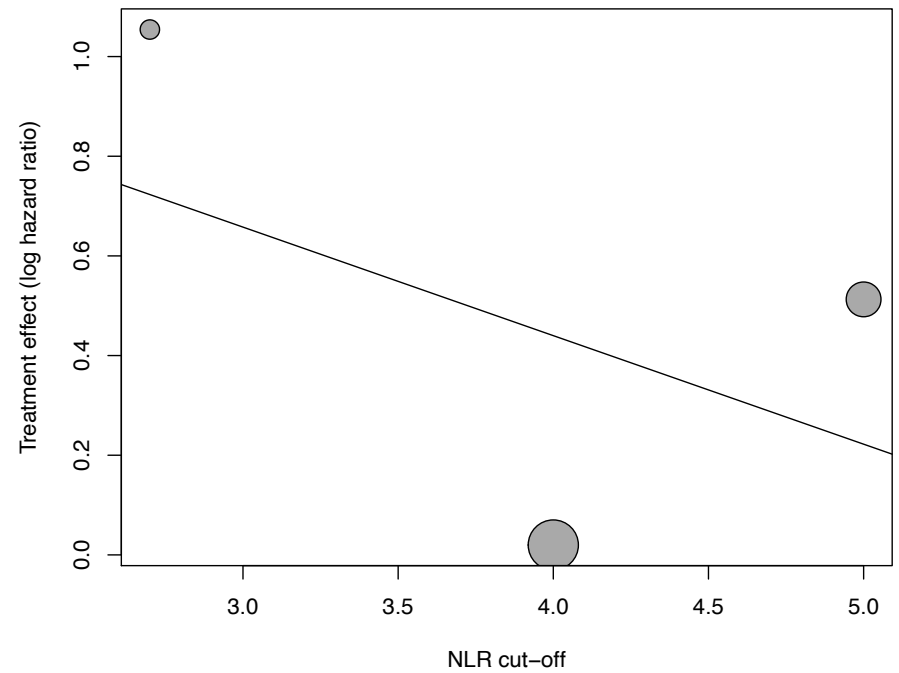

Supplementary Figure 93 - NLR: OS in renal cancer with tyrosine-kinase inhibitors

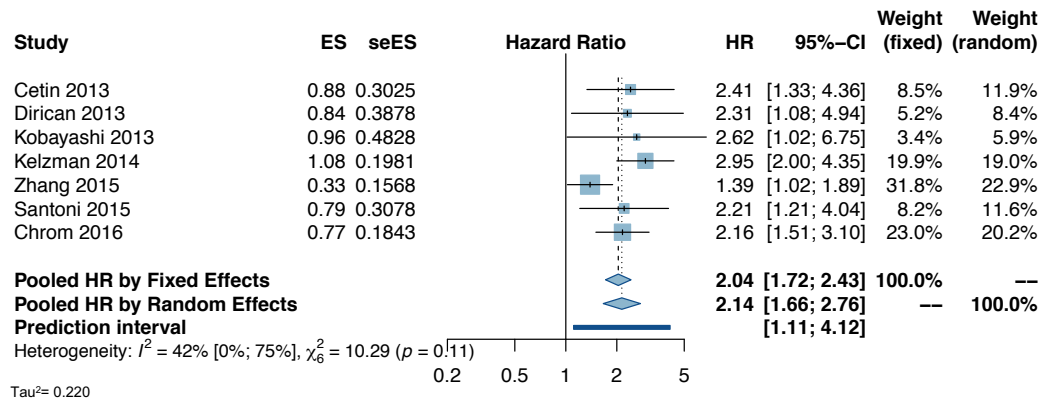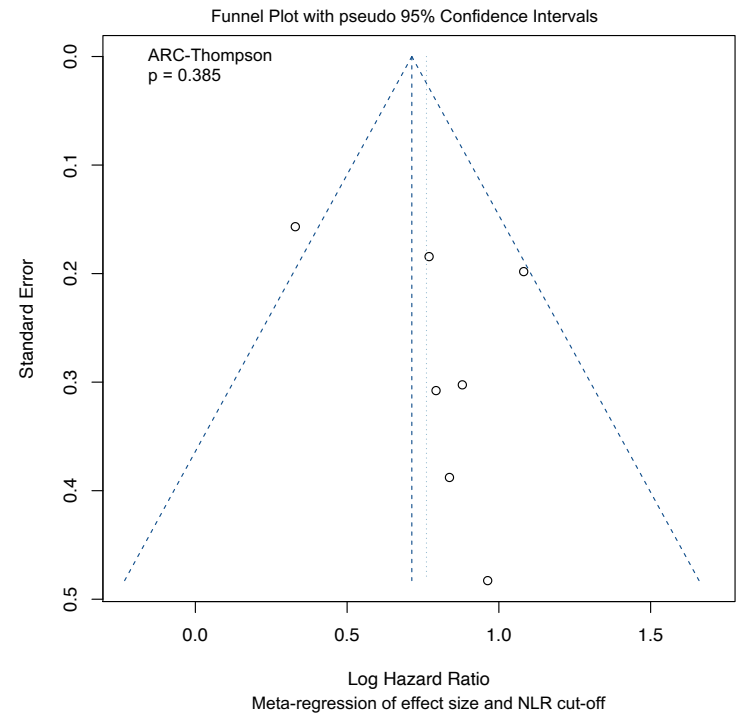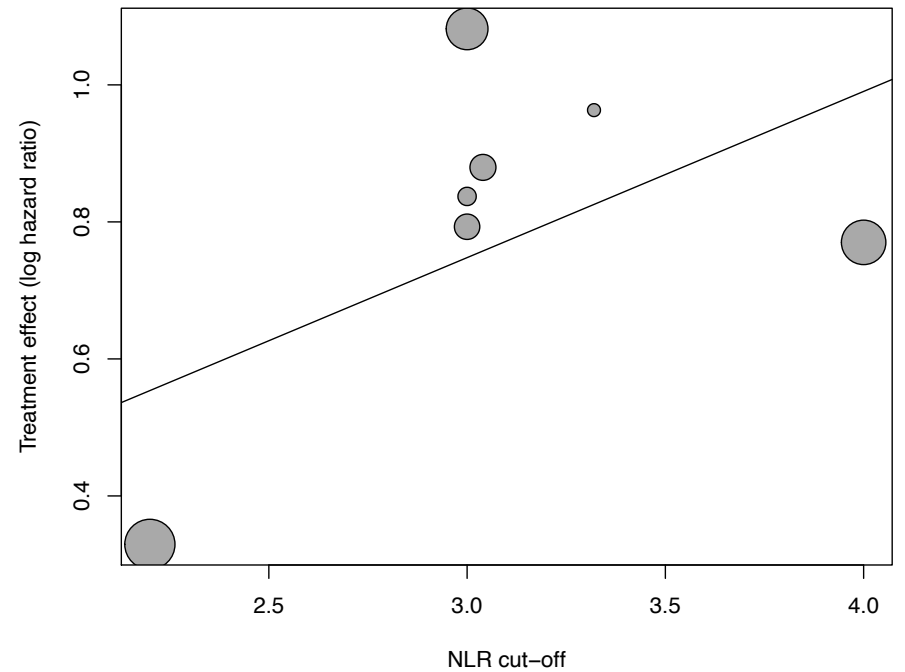

Supplementary Figure 94 - NLR: RFS in renal cancer

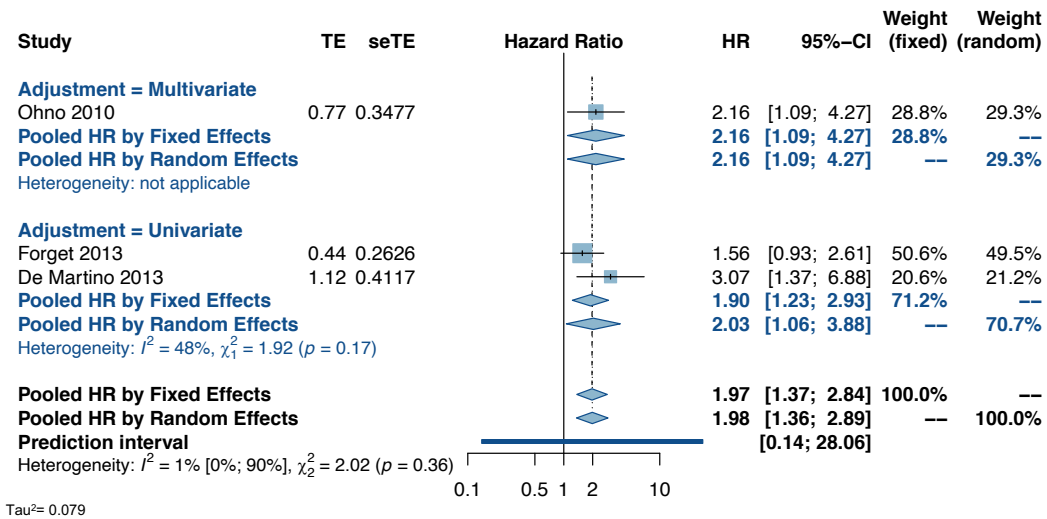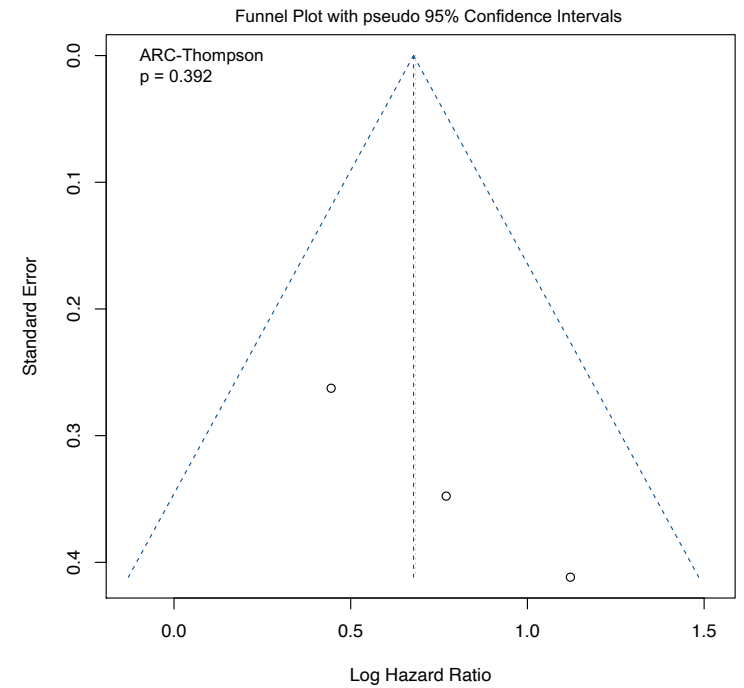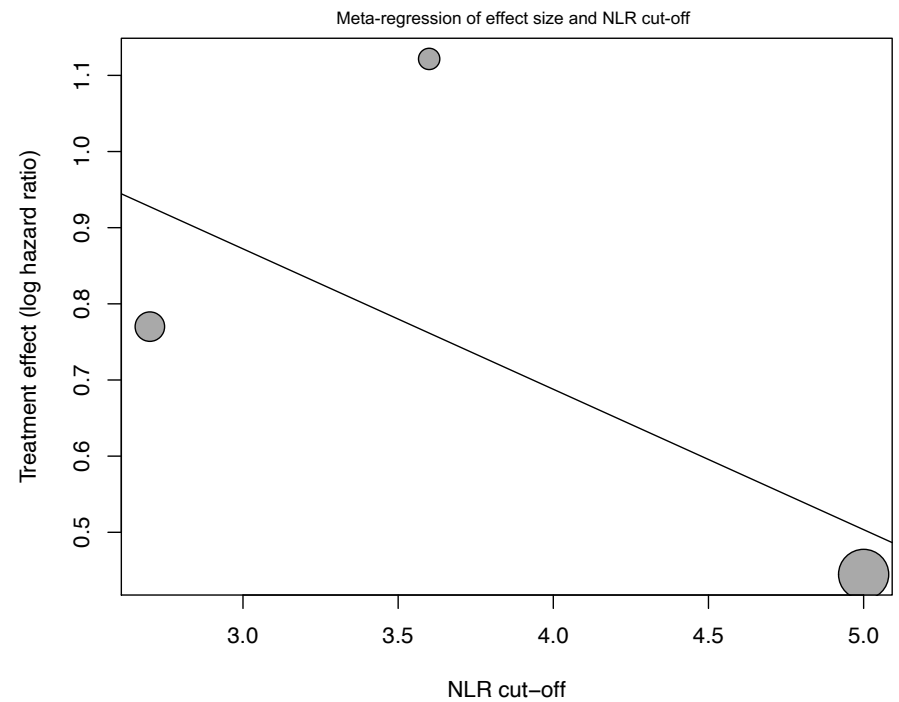

Supplementary Figure 95 - NLR: RFS in localised renal cancer

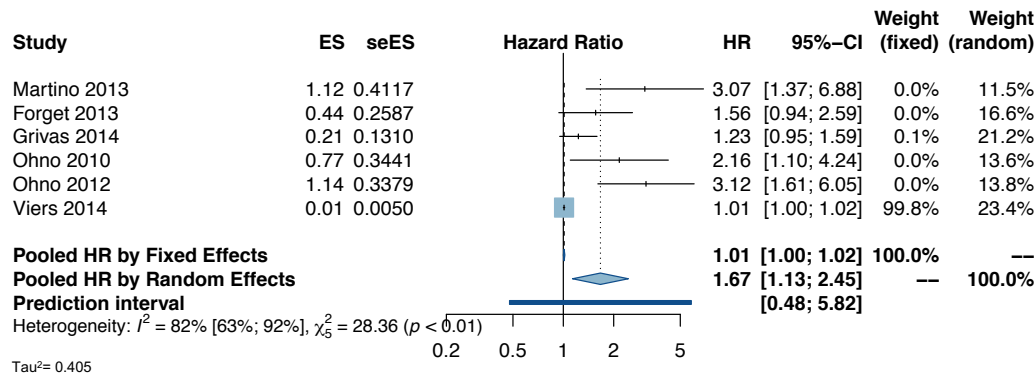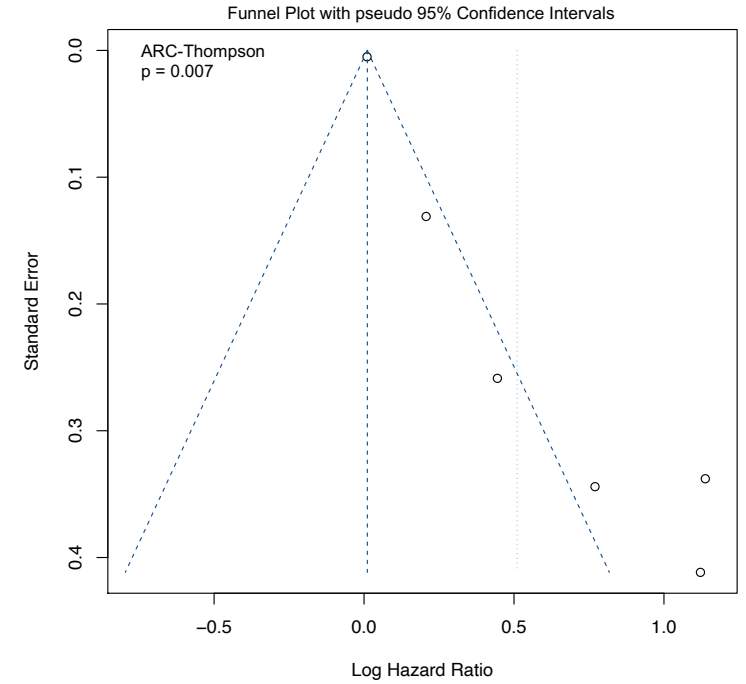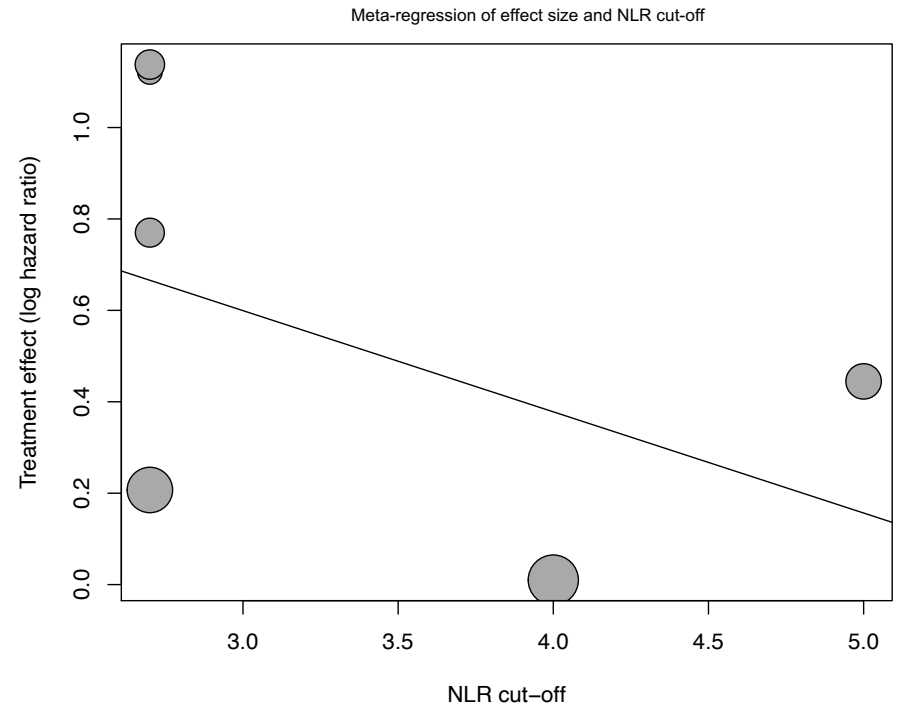



### Supplementary Figure 96 - NLR: PFS in renal cancer

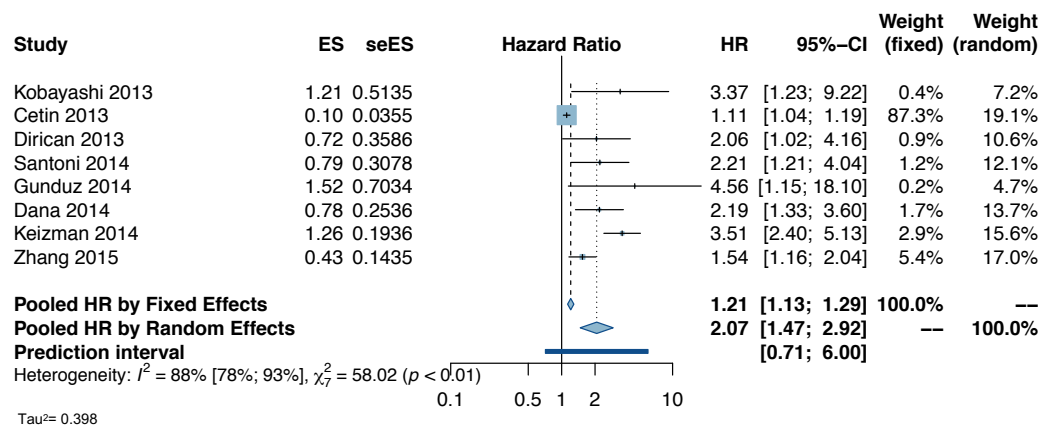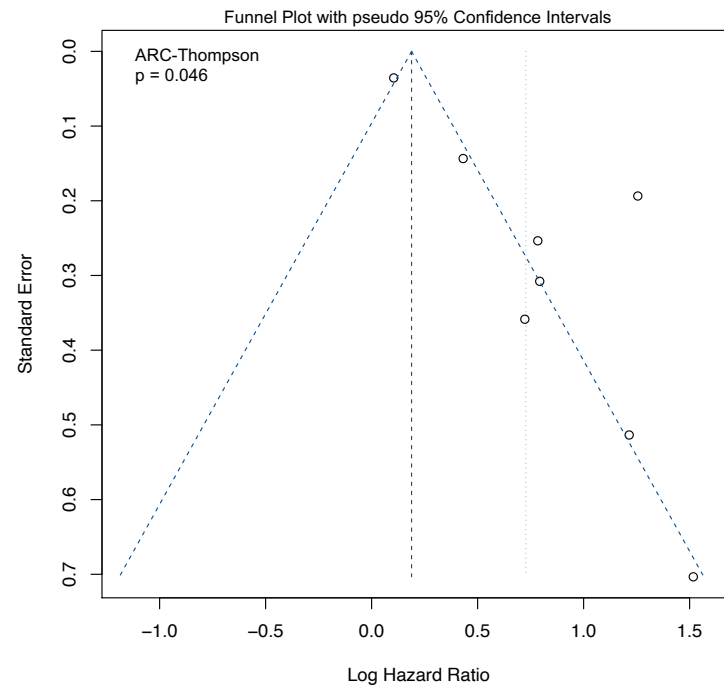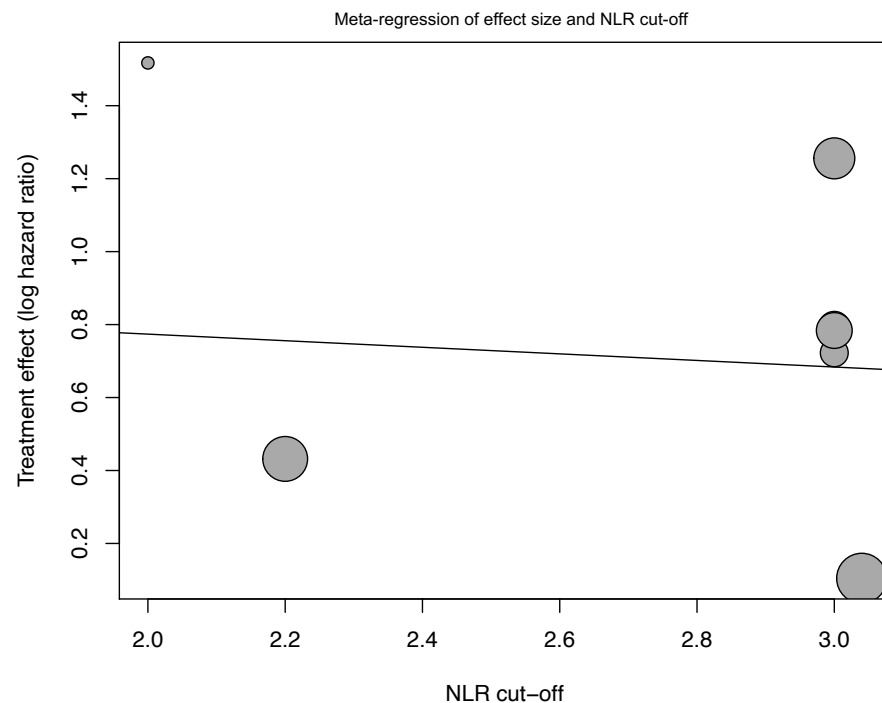

**Supplementary Figure 97 - NLR: PFS in advanced renal cancer**

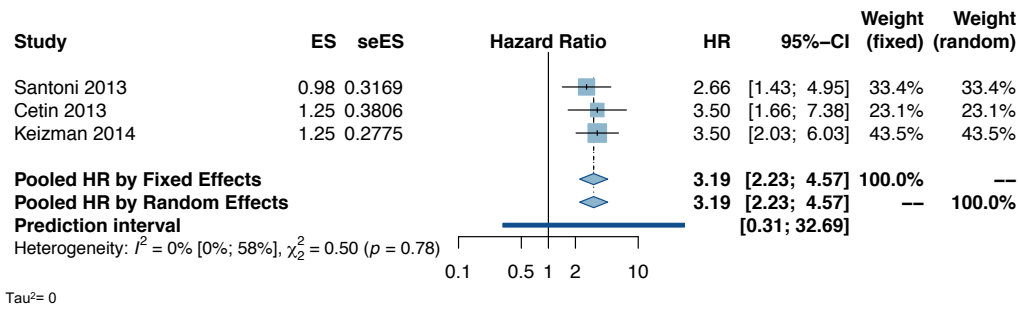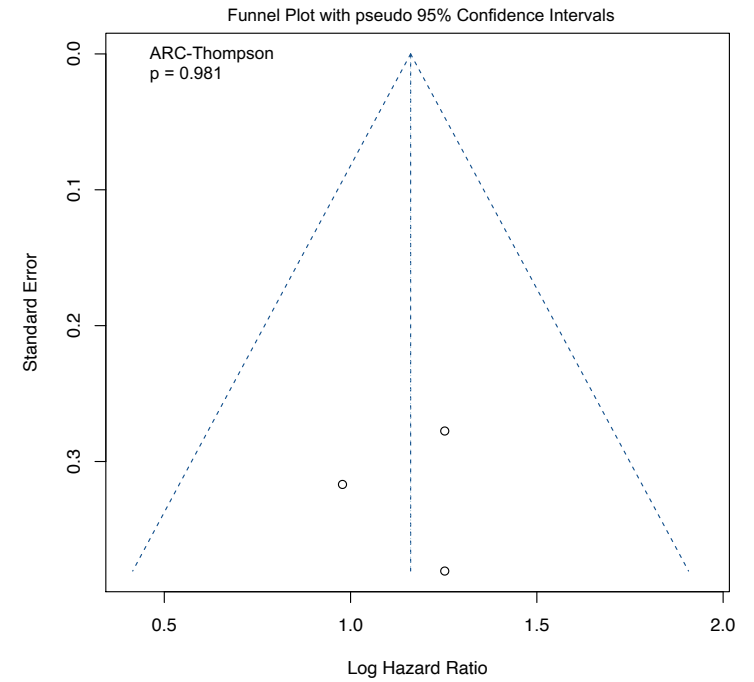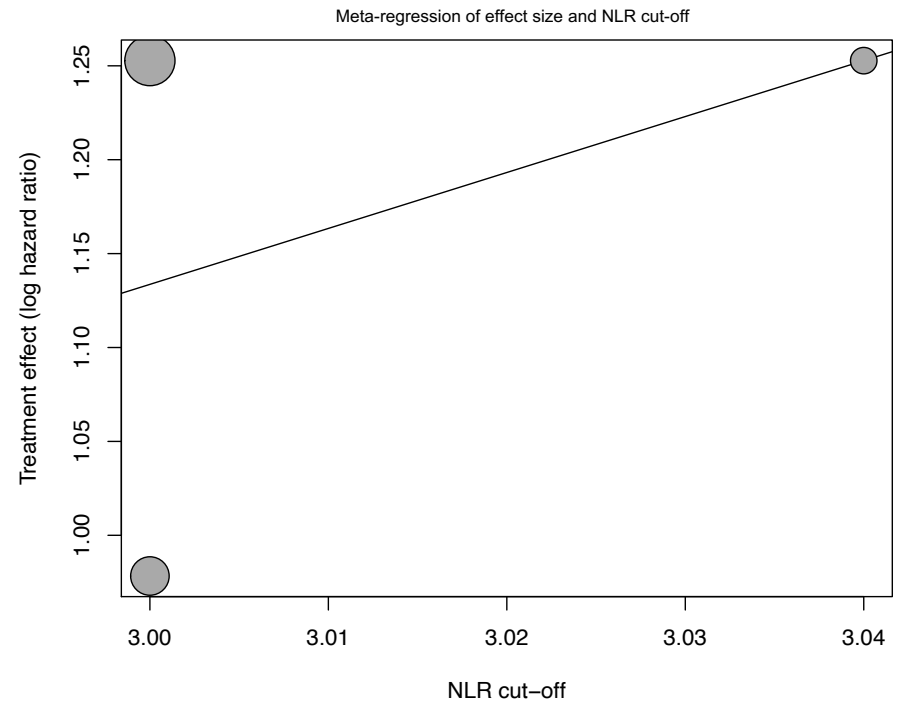

Supplementary Figure 98 - NLR: PFS in renal cancer with tyrosine-kinase inhibitors

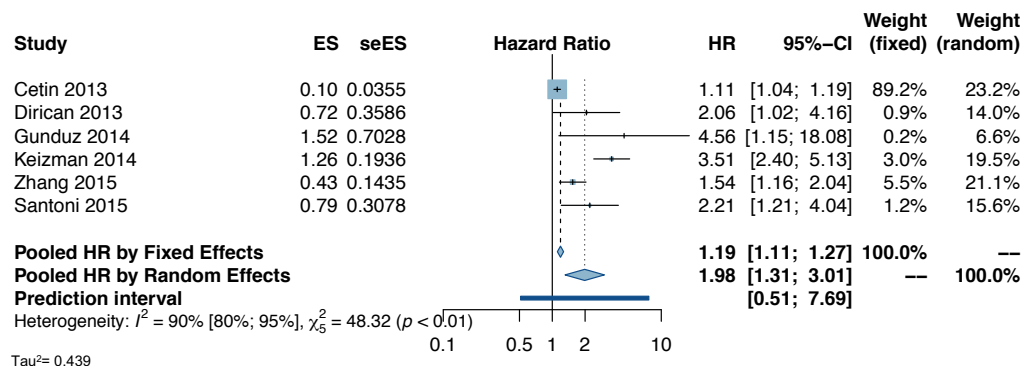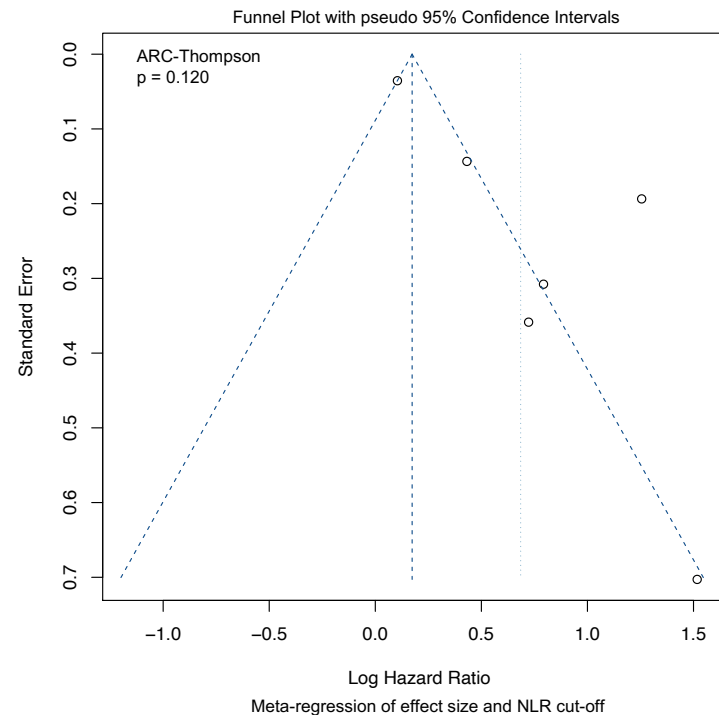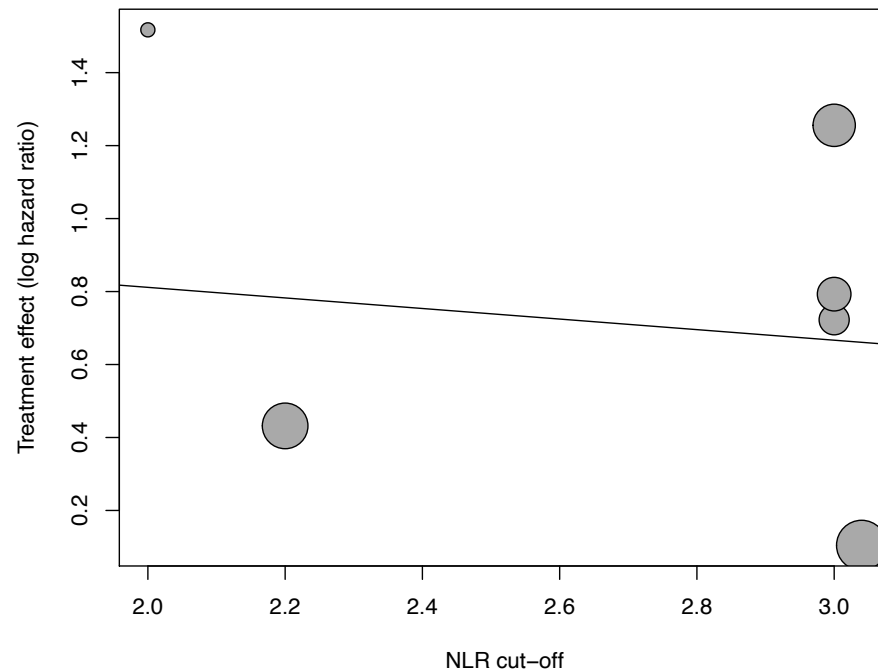

Supplementary Figure 99 - NLR: CSS in renal cancer

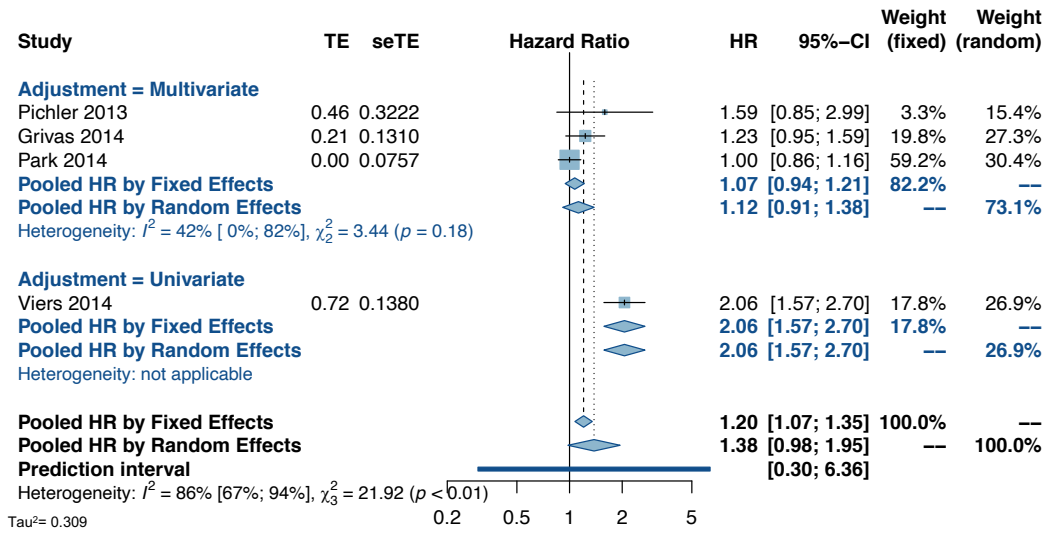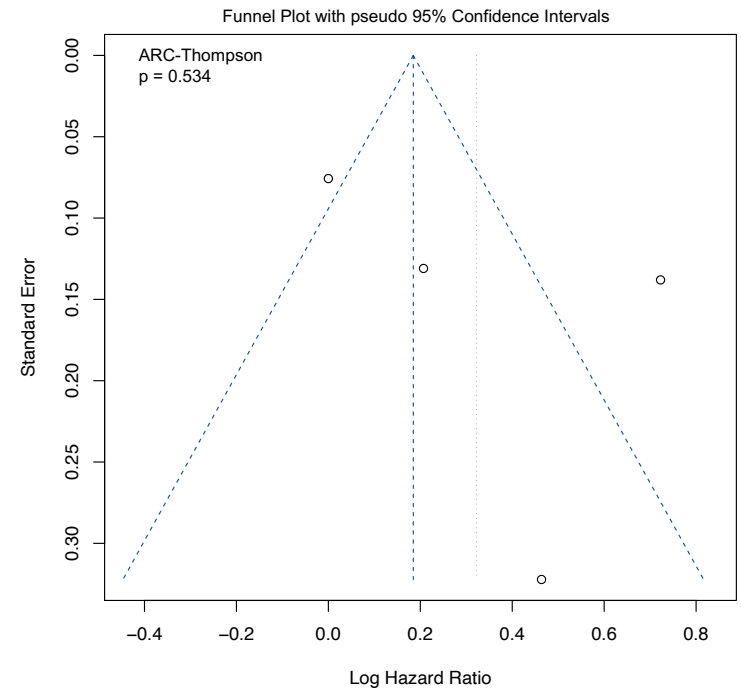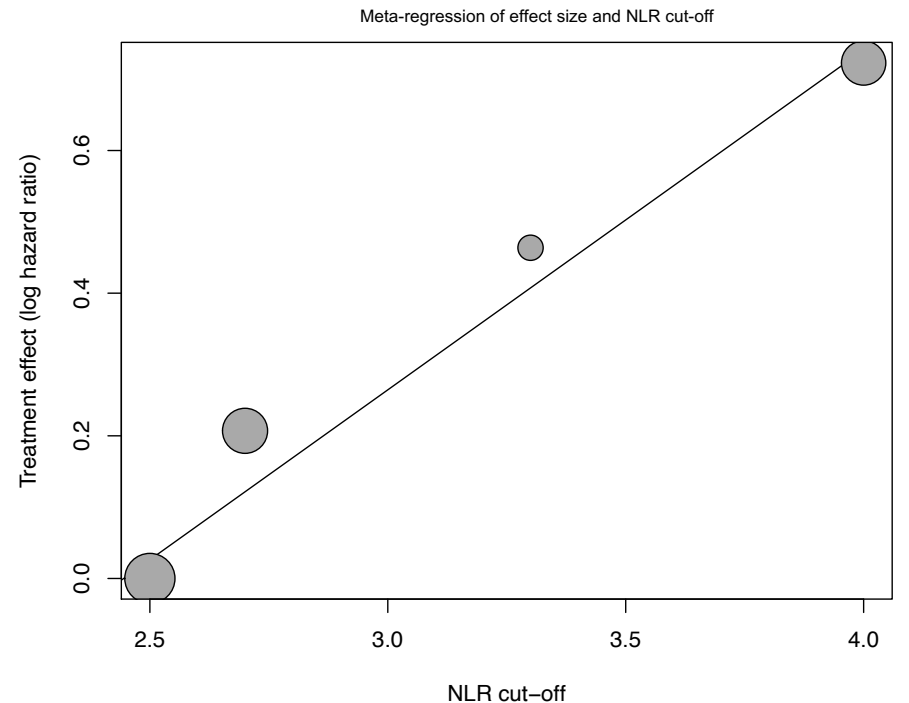

Supplementary Figure 100 - NLR: RFS in urothelial carcinoma

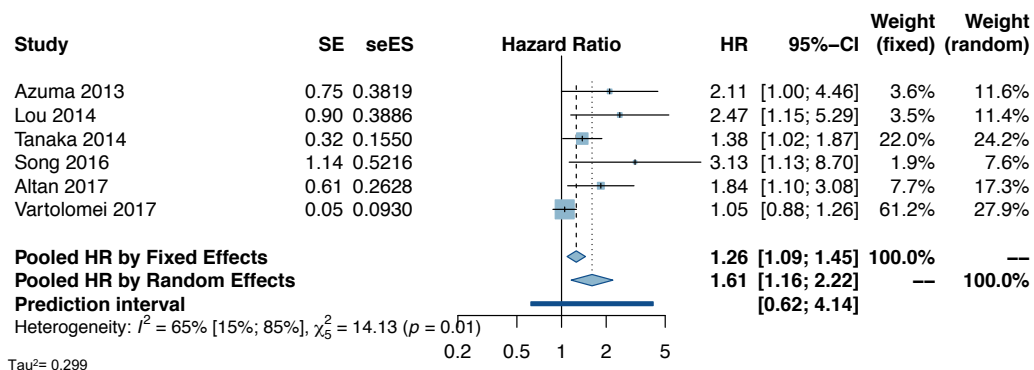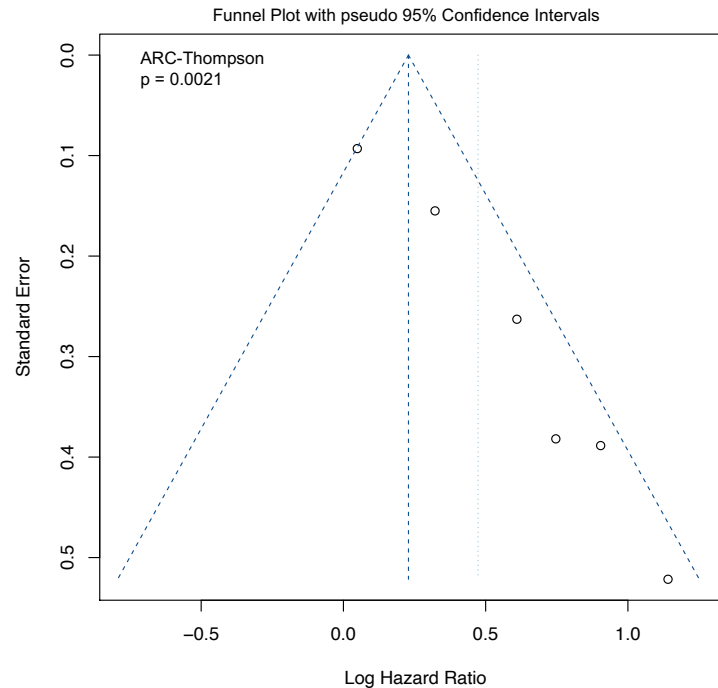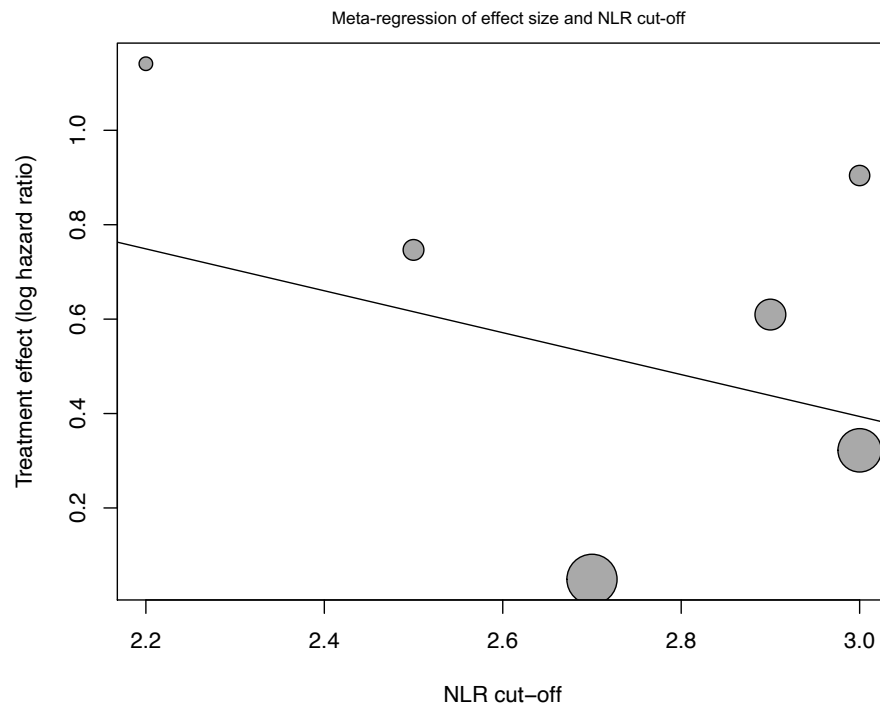

Supplementary Figure 101 - NLR: OS in urinary cancer

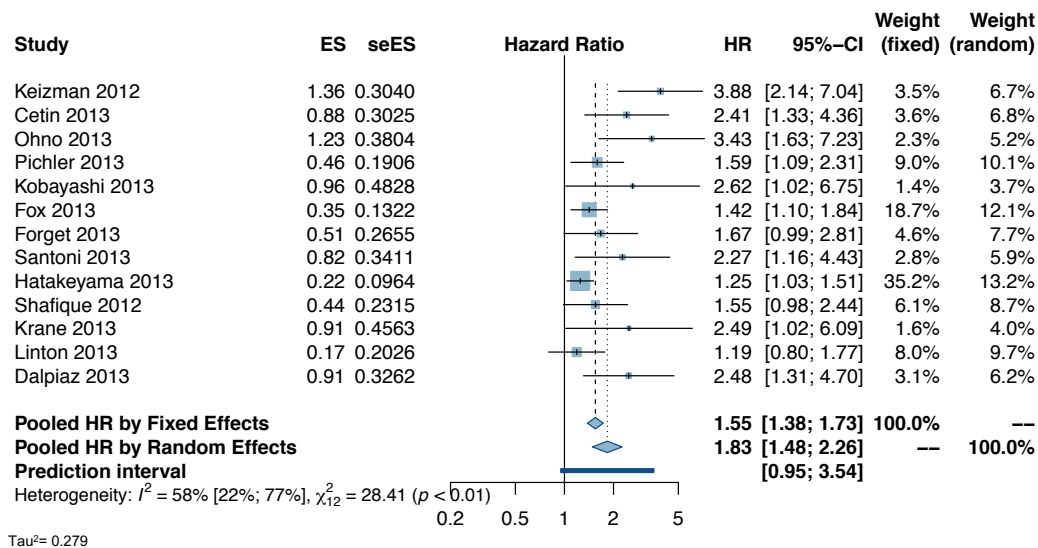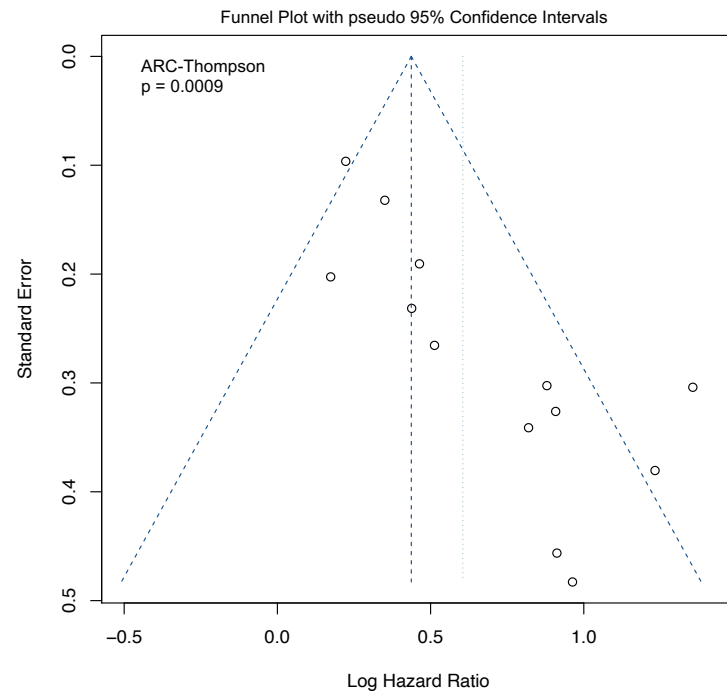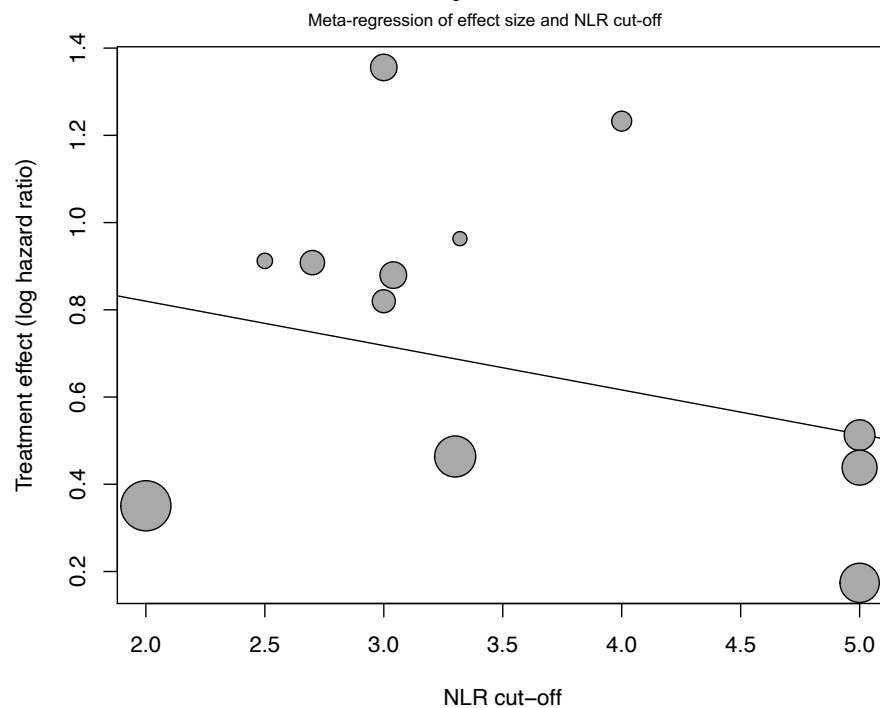

Supplementary Figure 102 - NLR: RFS in upper urinary cancer

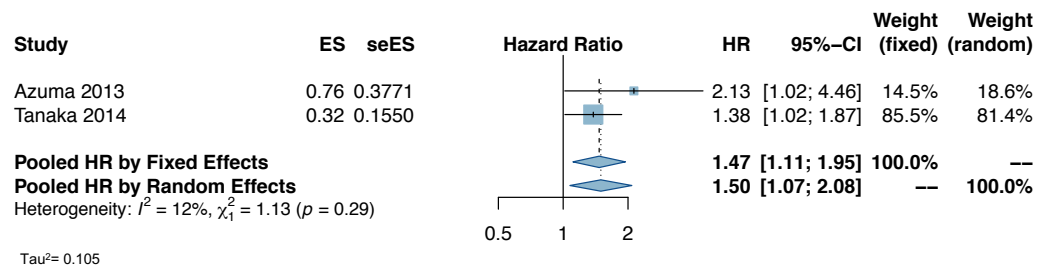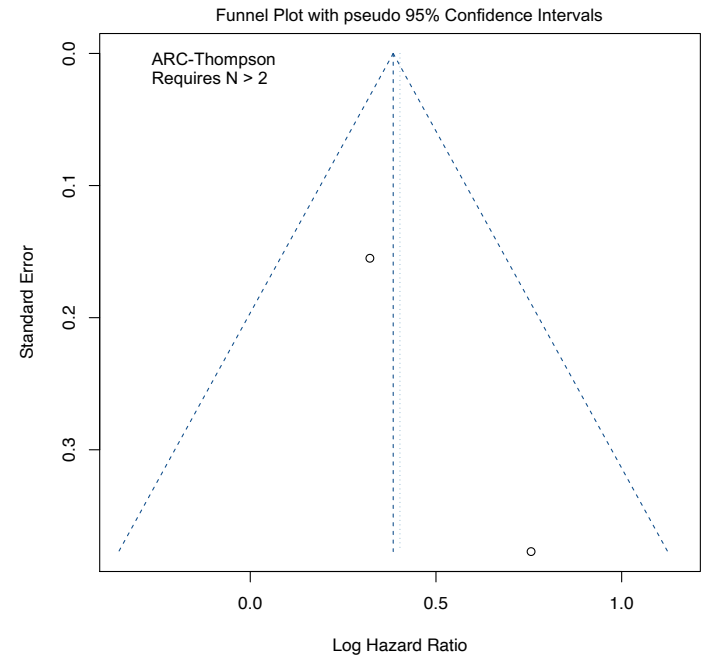

Supplementary Figure 103 - NLR: OS in bladder cancer with metastasis

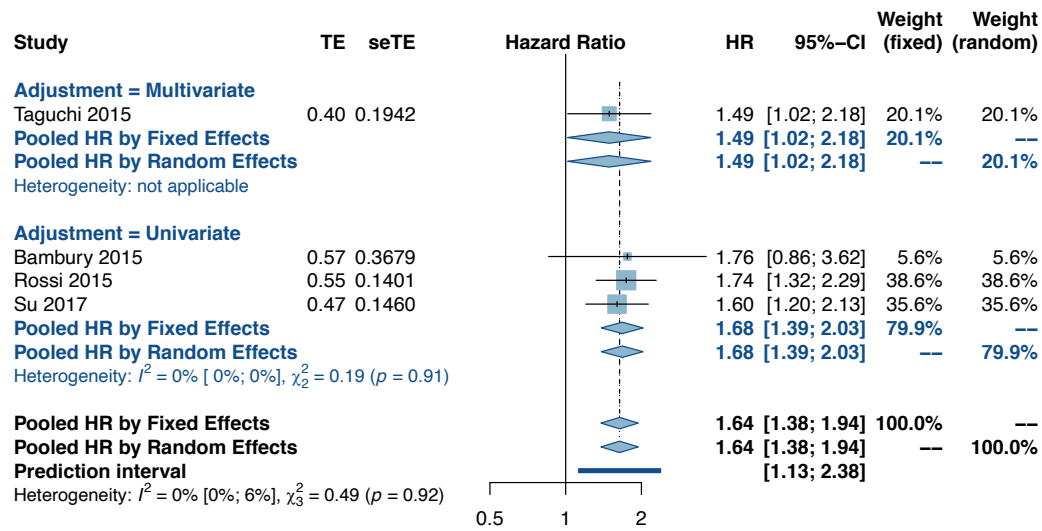

Tau<sup>2</sup>= 0

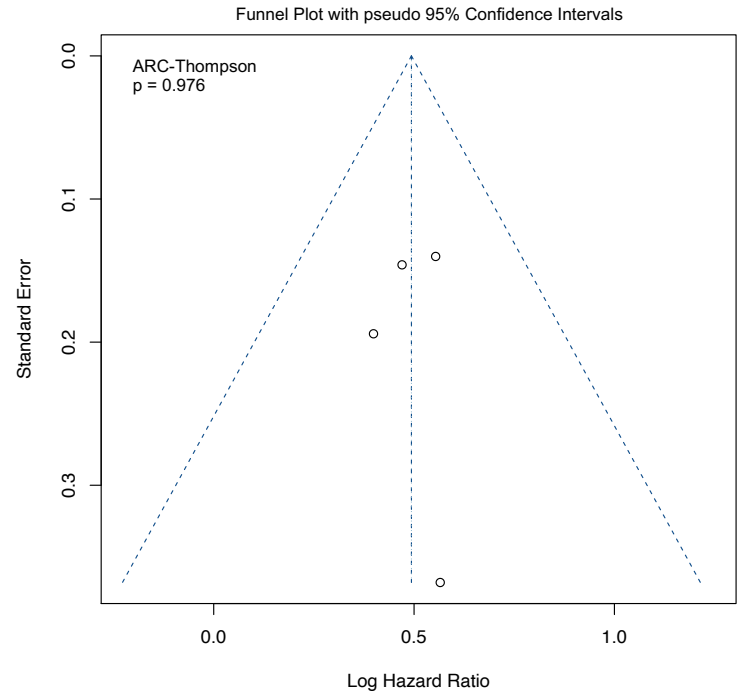



Supplementary Figure 104 - NLR: PFS in bladder and upper urinary cancer

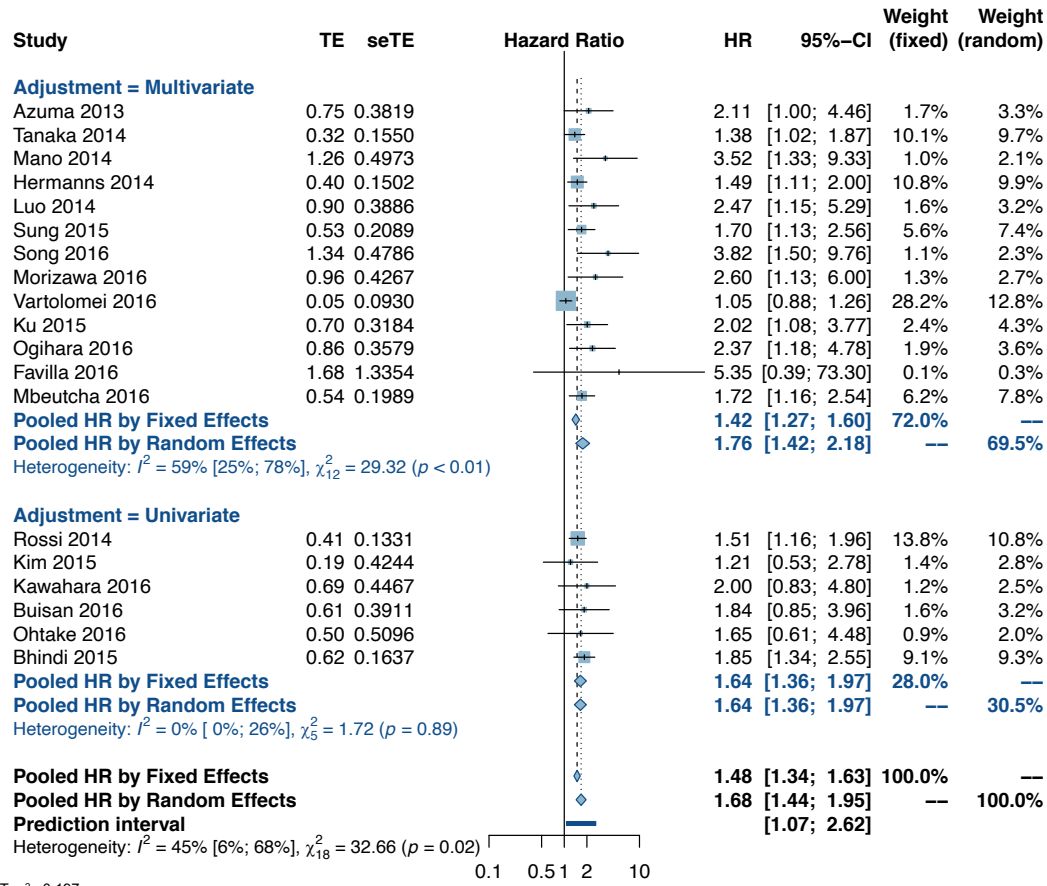

Tau<sup>2</sup> = 0.197

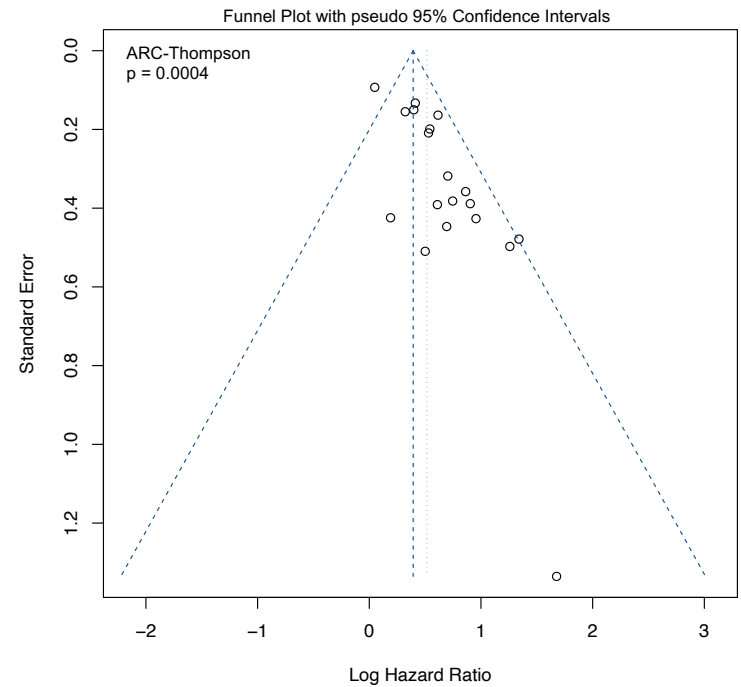

Supplementary Figure 105 - NLR: RFS in bladder cancer

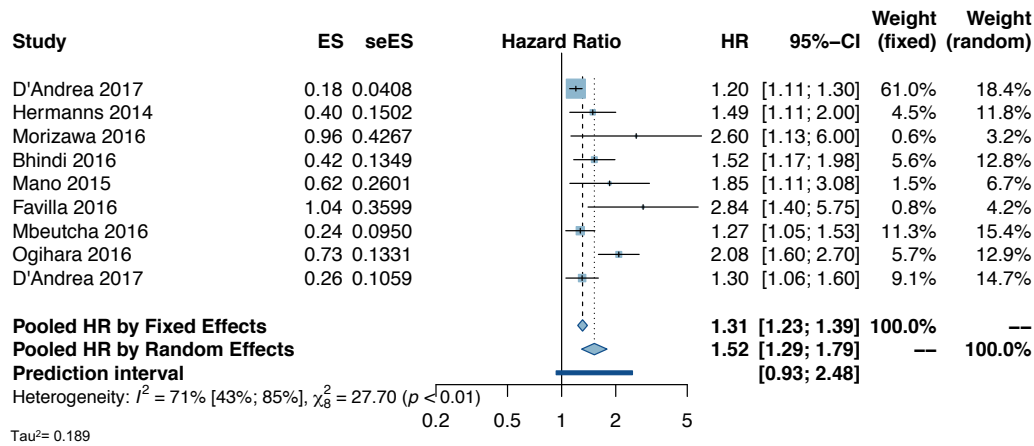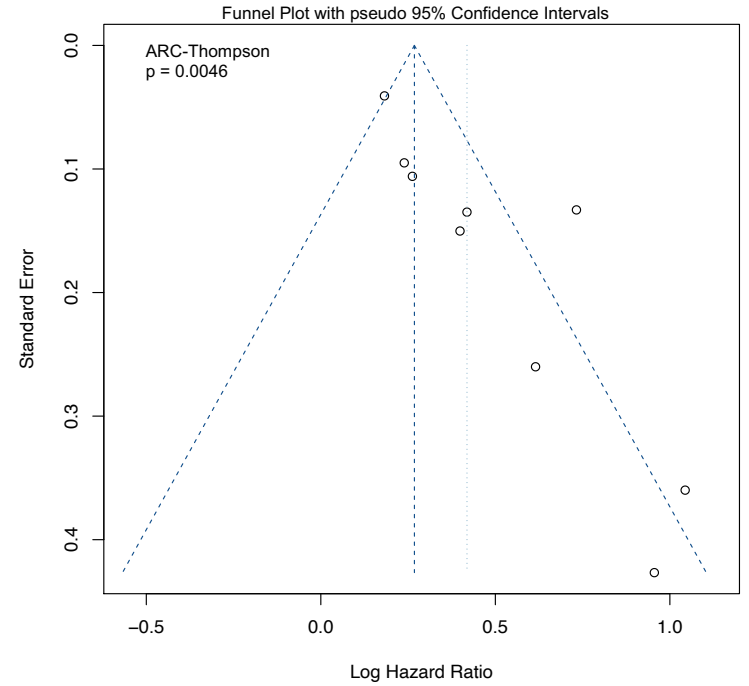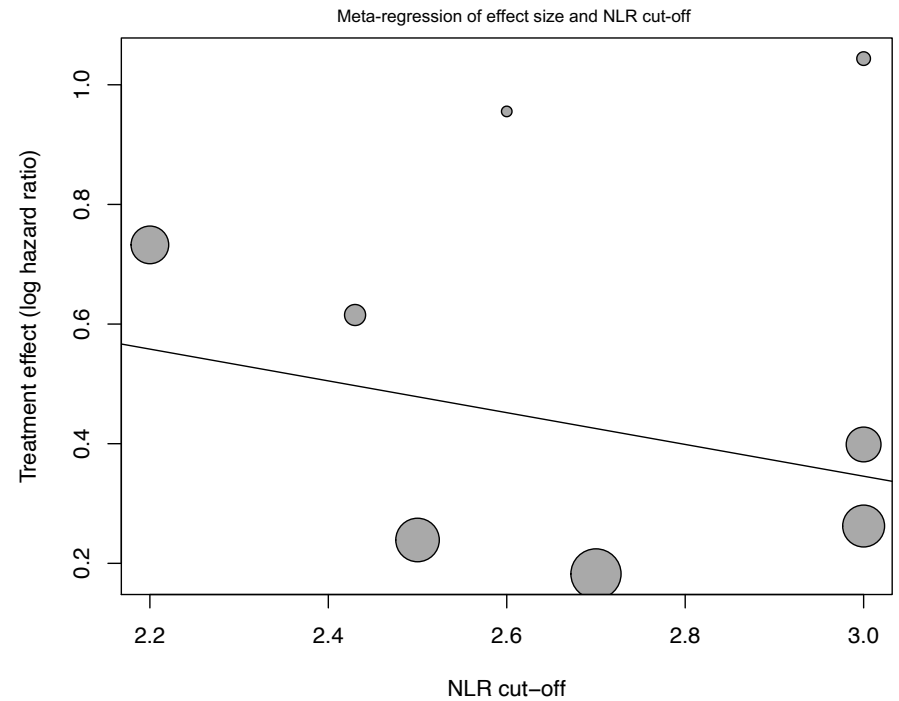

Supplementary Figure 106 - NLR: CSS in bladder and upper urinary cancer

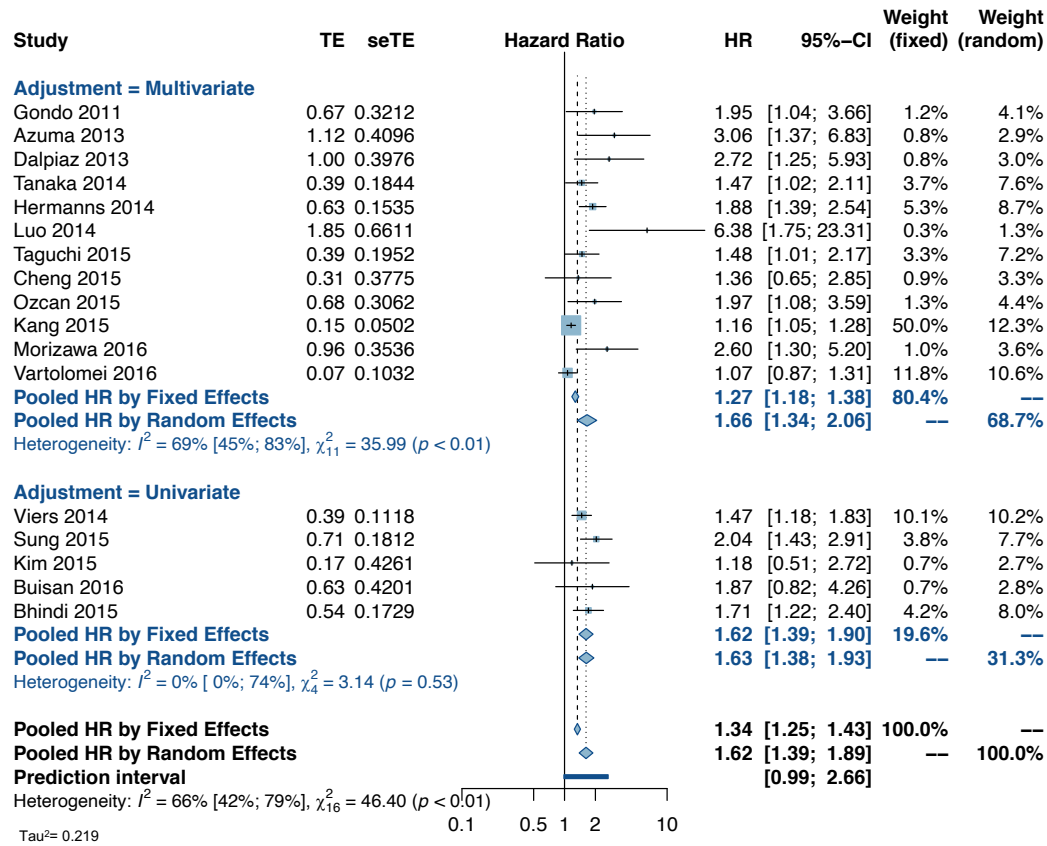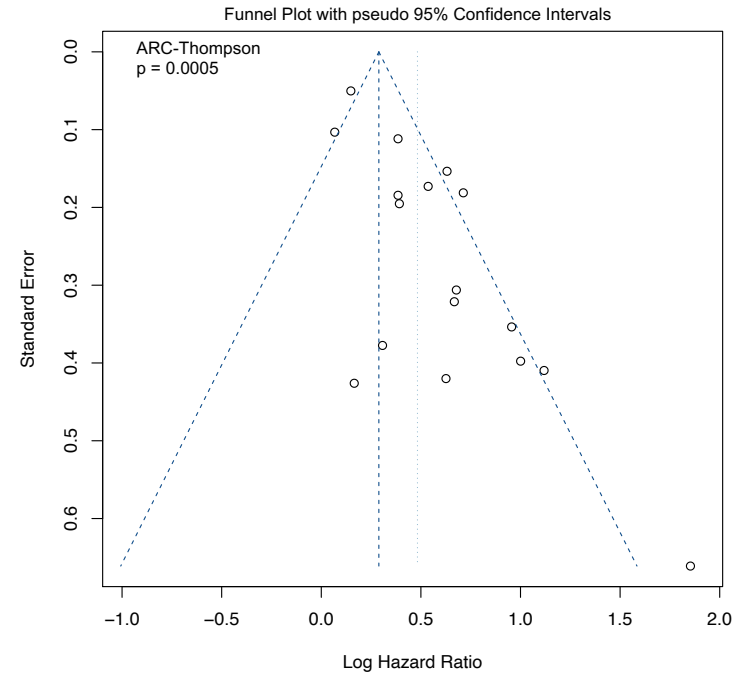

**Supplementary Figure 107 - NLR: PFS in castration resistant prostate cancer**

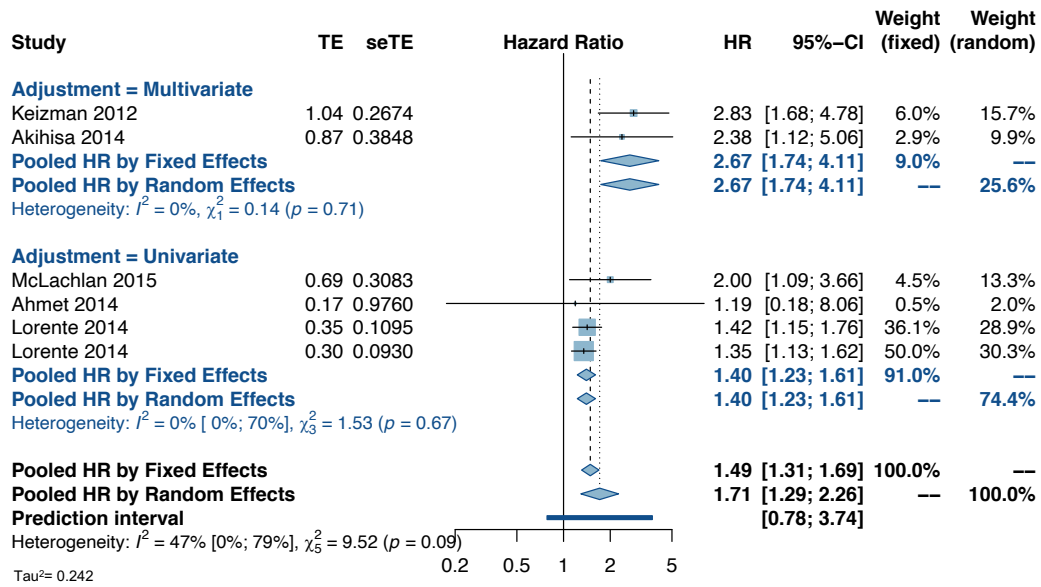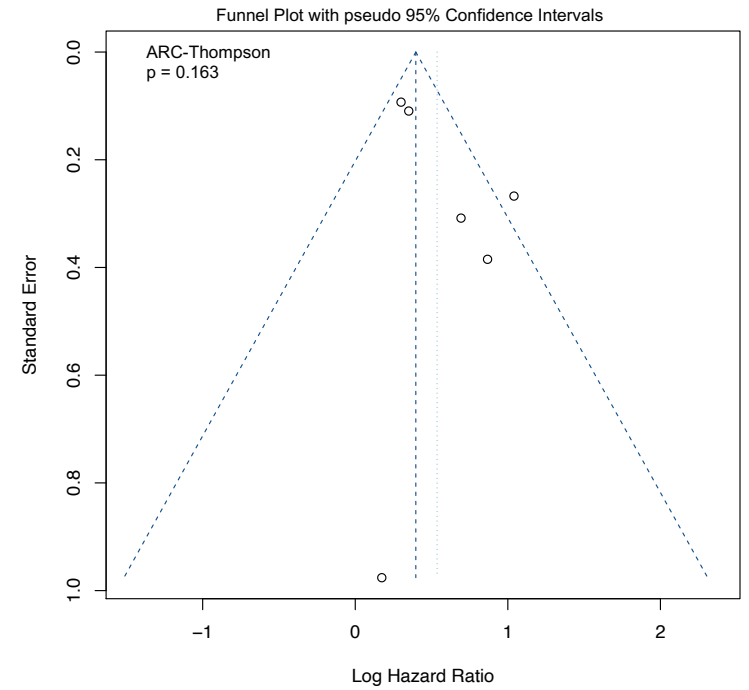

Supplementary Figure 108 - NLR: OS in castration resistant prostate cancer

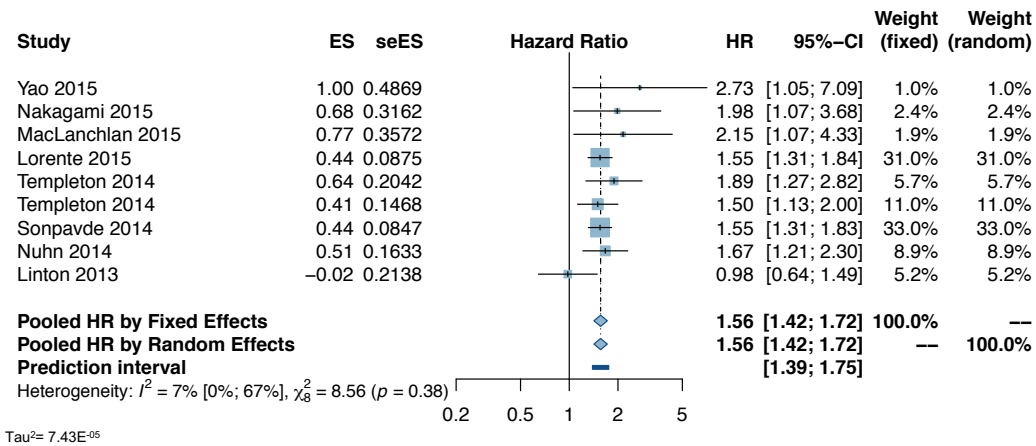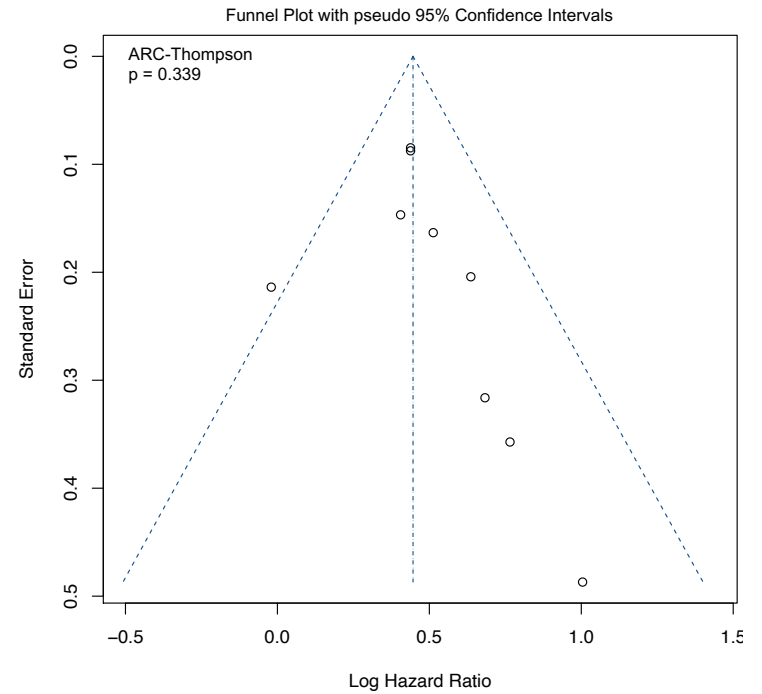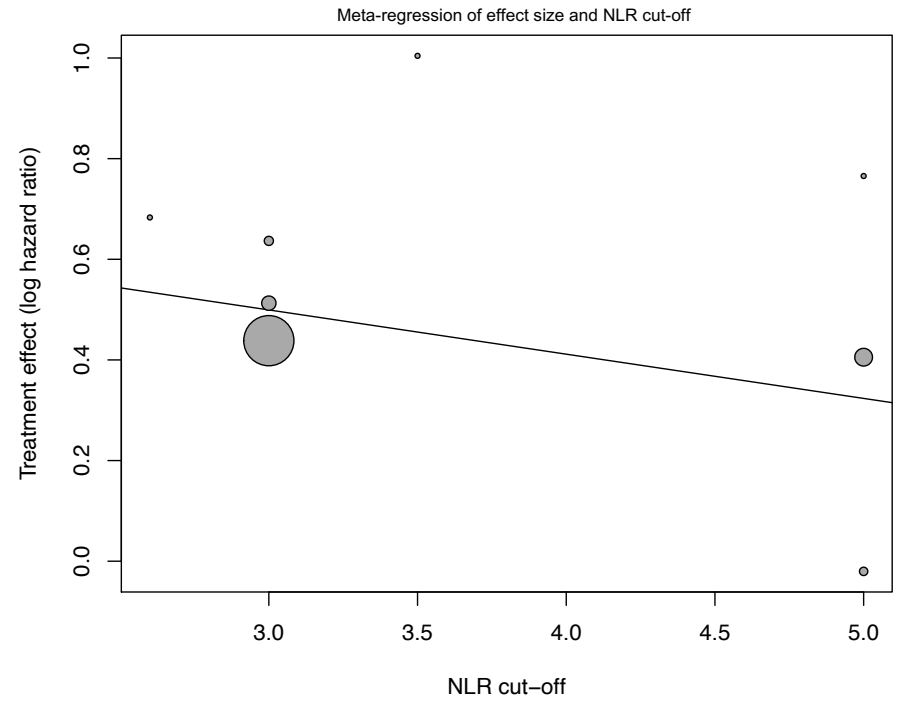

Supplementary Figure 109 - NLR: OS in localised prostate cancer

| Study             | ES   | seES   |
|-------------------|------|--------|
| Sharma 2015       | 0.11 | 0.0601 |
| Langenlehner 2015 | 0.77 | 0.3131 |

**Pooled HR by Fixed Effects**  
**Pooled HR by Random Effects**  
 Heterogeneity:  $I^2 = 76\%$ ,  $\chi^2_1 = 4.24$  ( $p = 0.04$ )

Tau<sup>2</sup>= 0.406

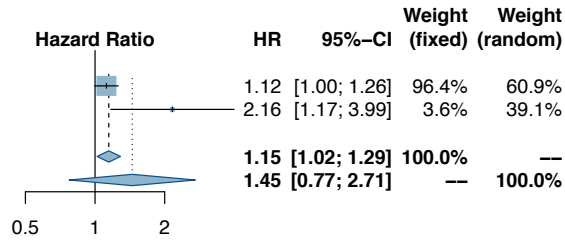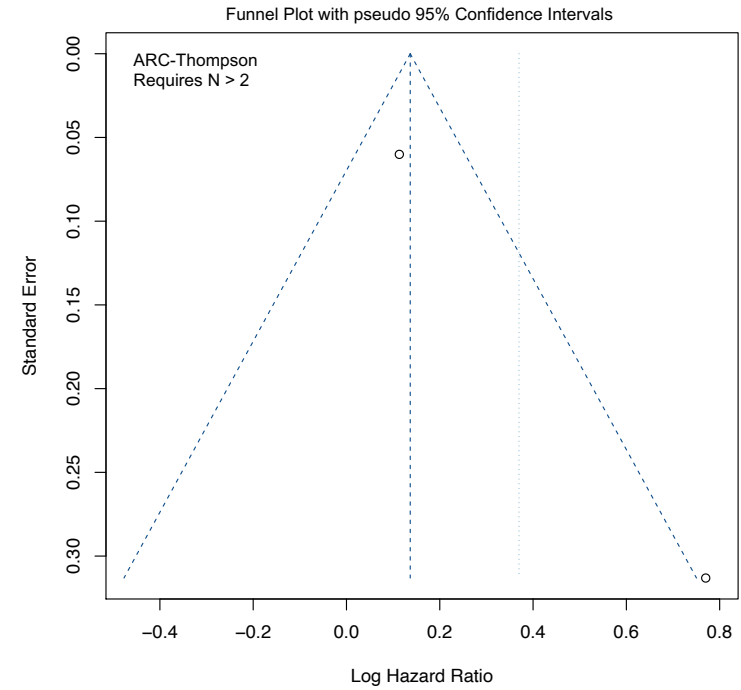

**Supplementary Figure 110 - NLR: RFS in non muscle-invasive bladder cancer**

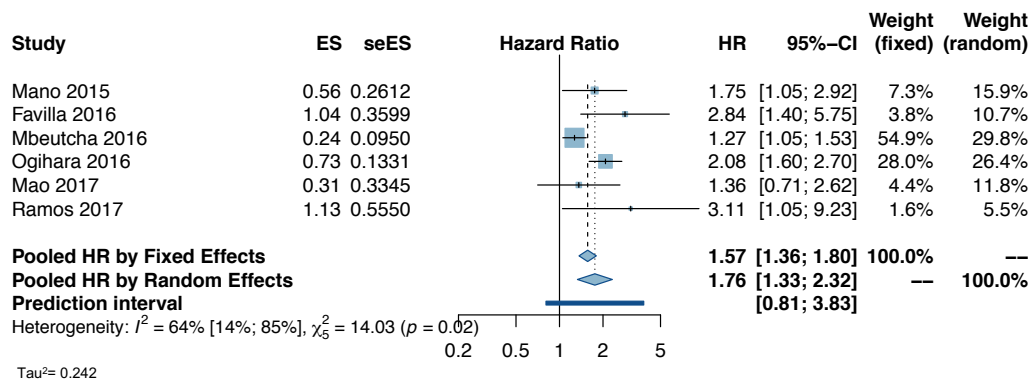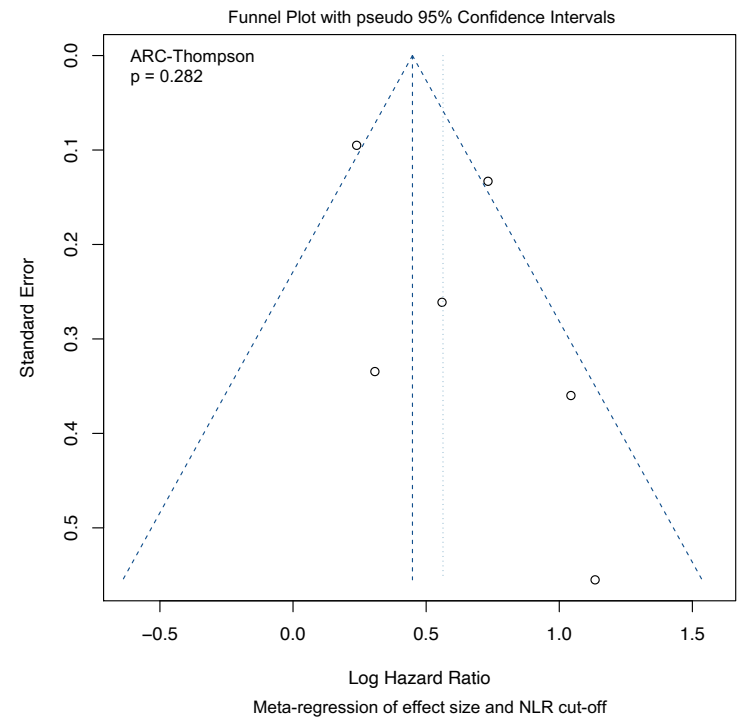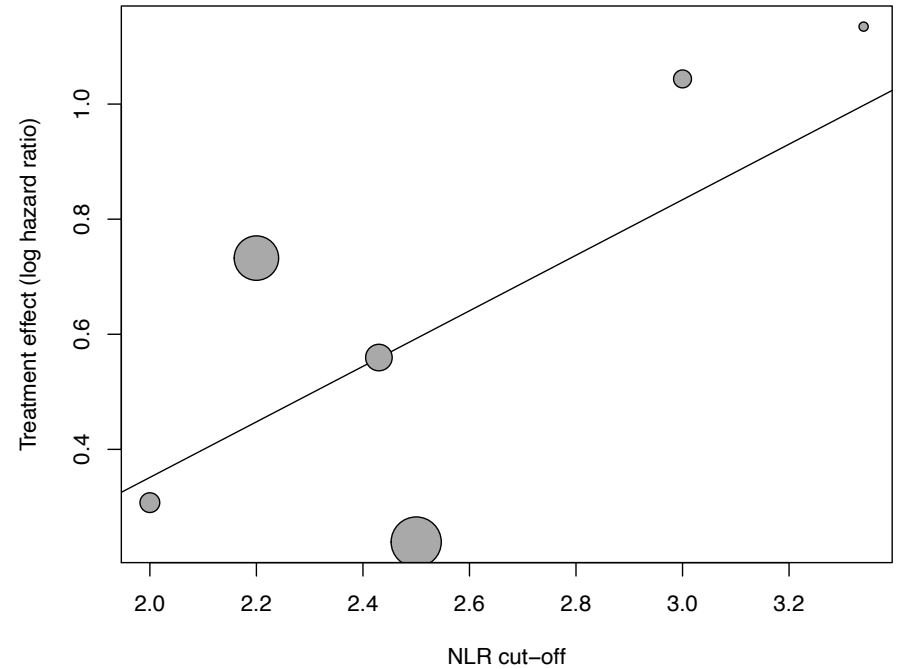

Supplementary Figure 111 - NLR: PFS in non muscle-invasive bladder cancer

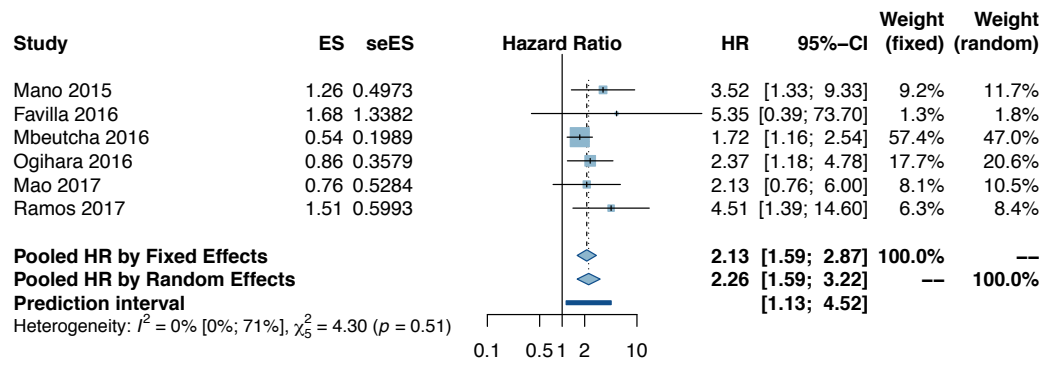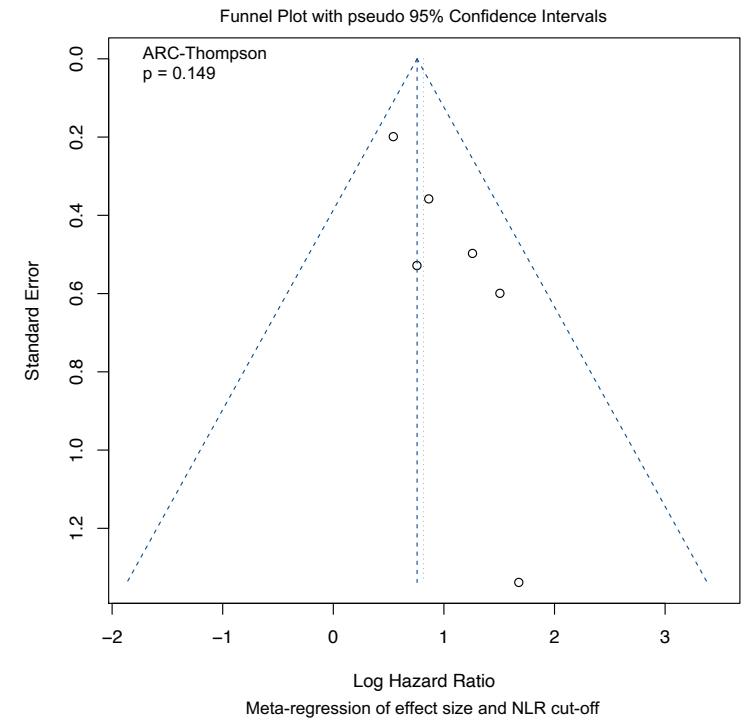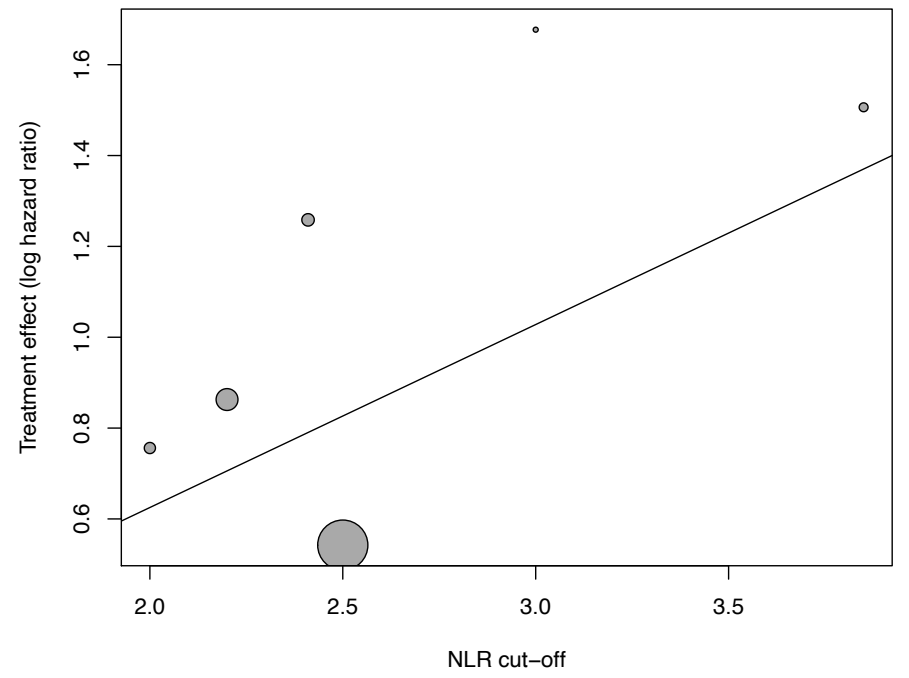



**Supplementary Figure 112 - NLR: RFS in high risk non muscle-invasive bladder cancer**

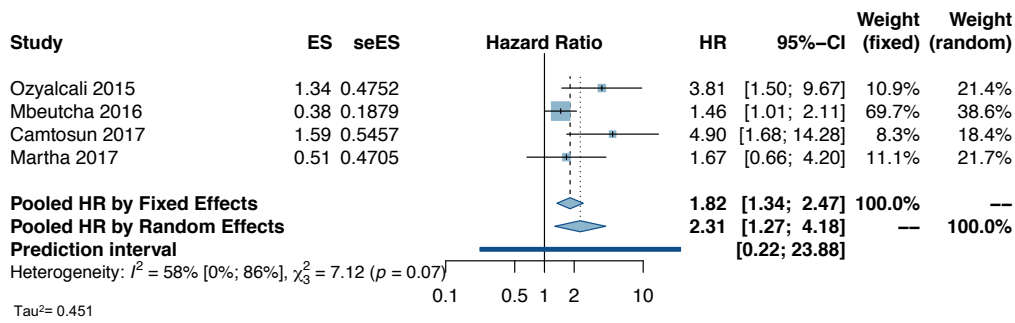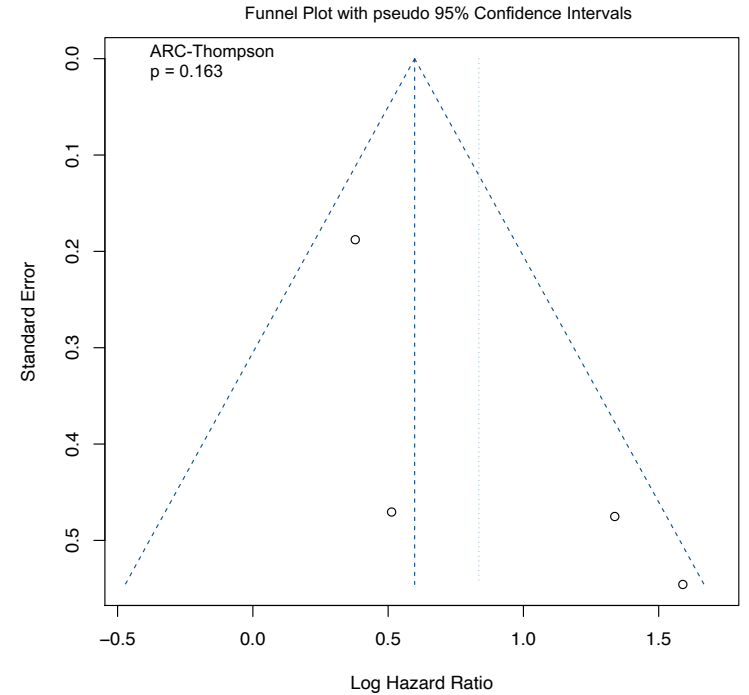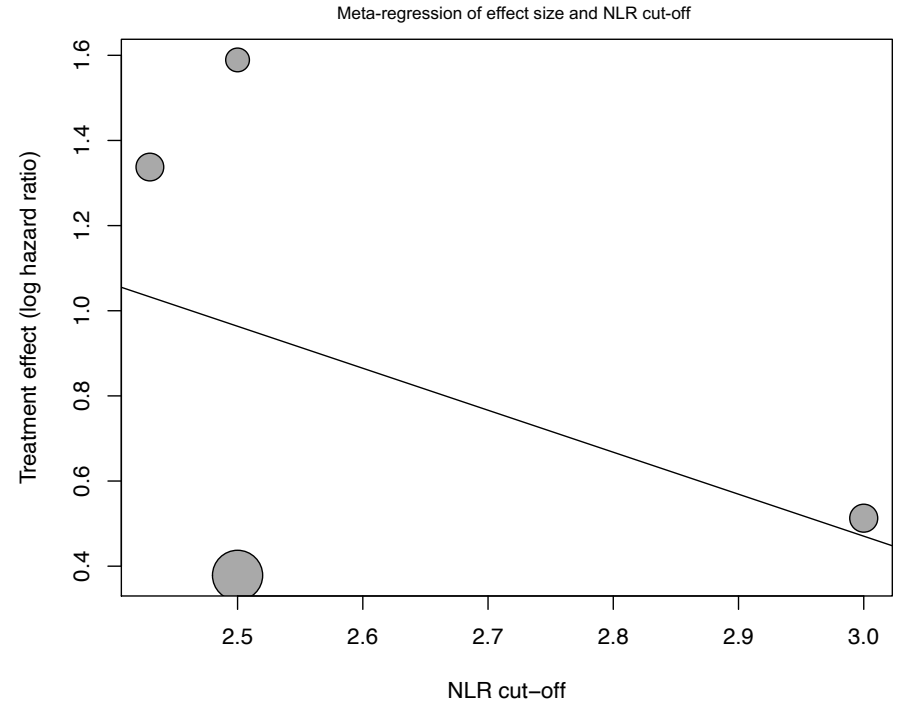

**Supplementary Figure 113 - NLR: PFS in high risk non muscle-invasive bladder cancer**

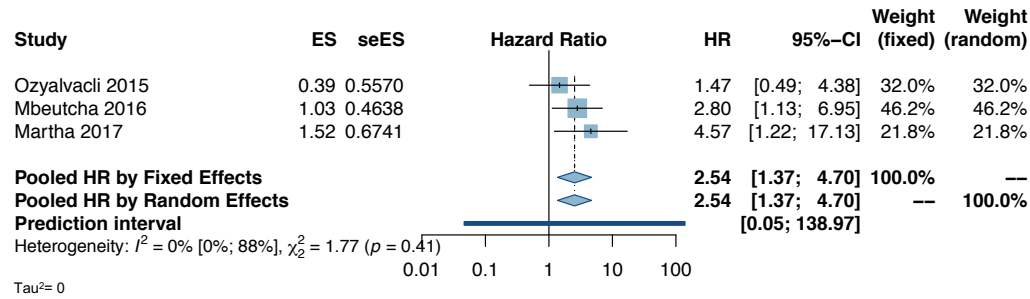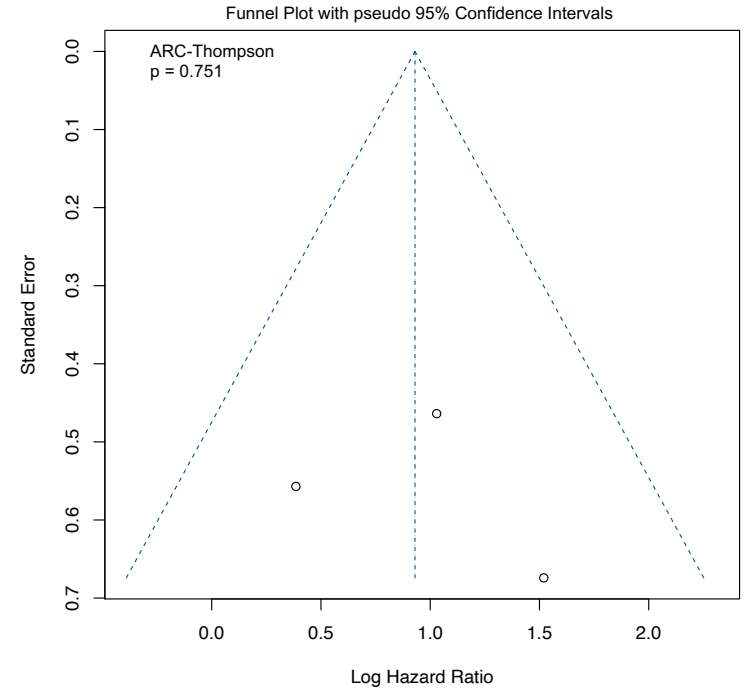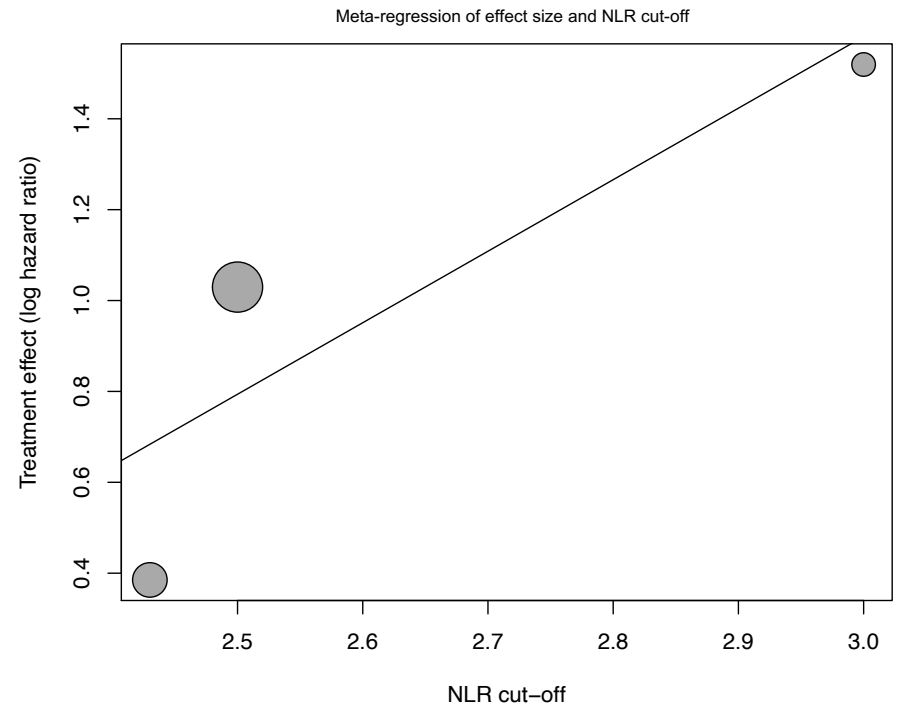

Supplementary Figure 114 - NLR: OS in STS

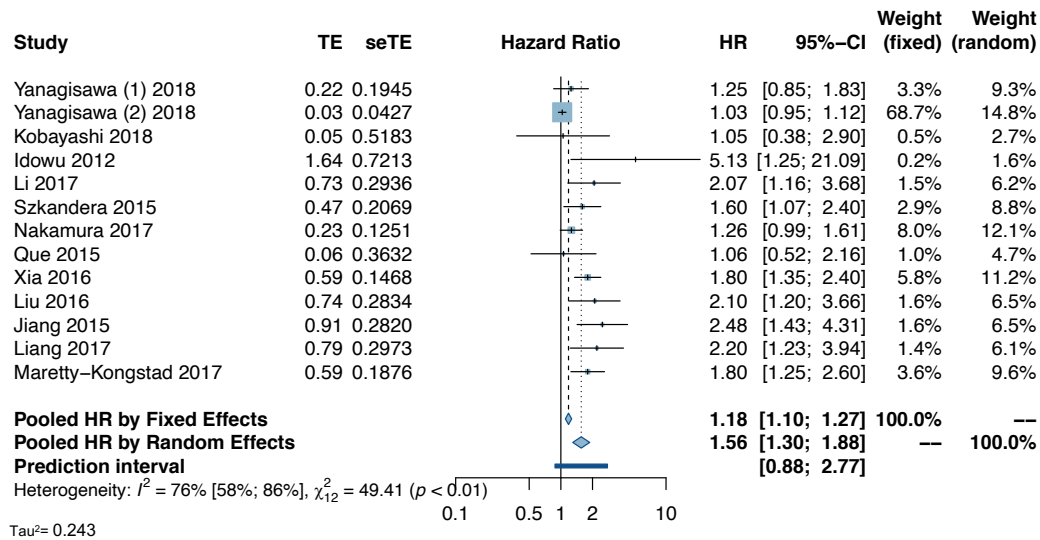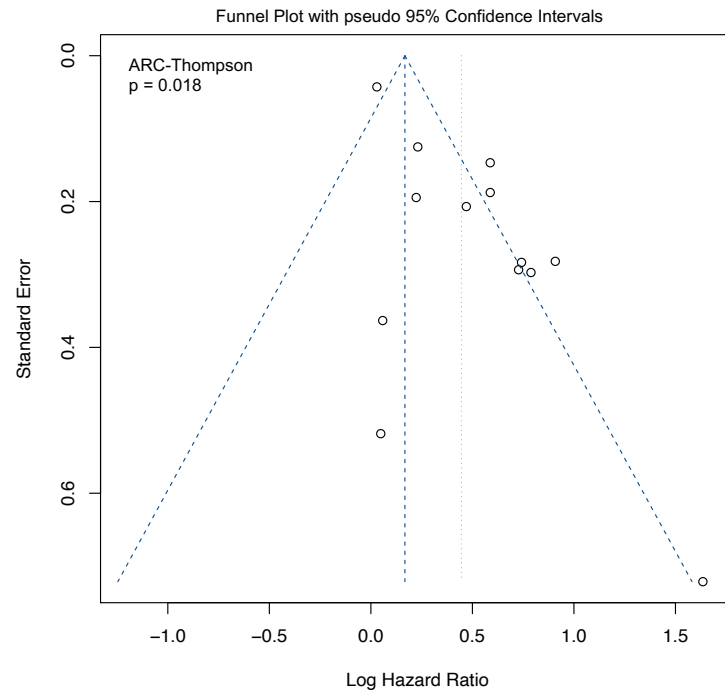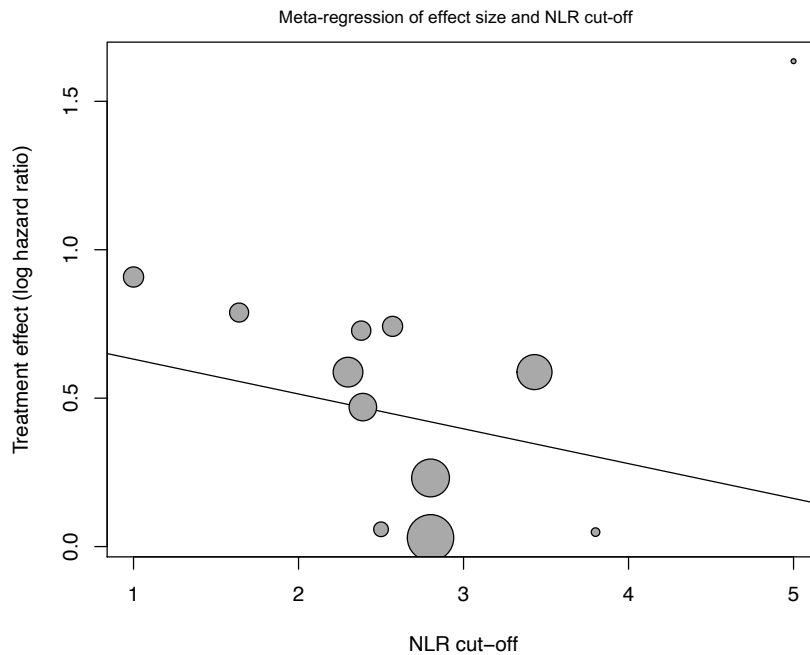

### Supplementary Figure 115 - NLR: DFS in STS

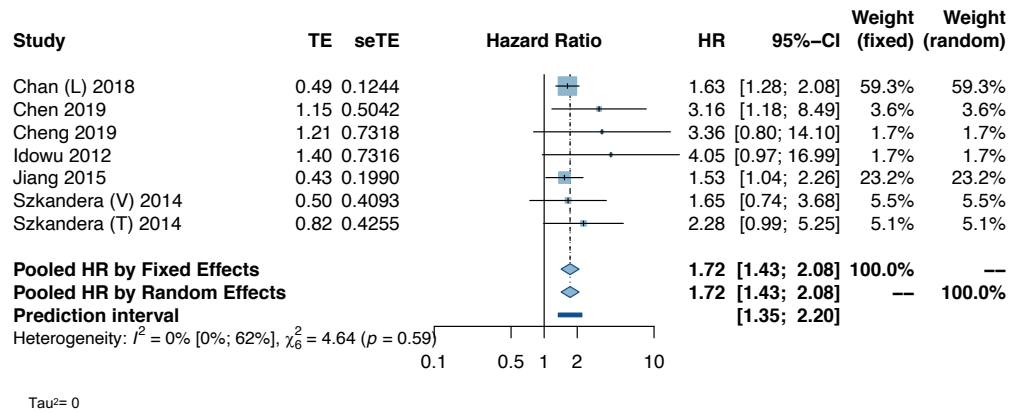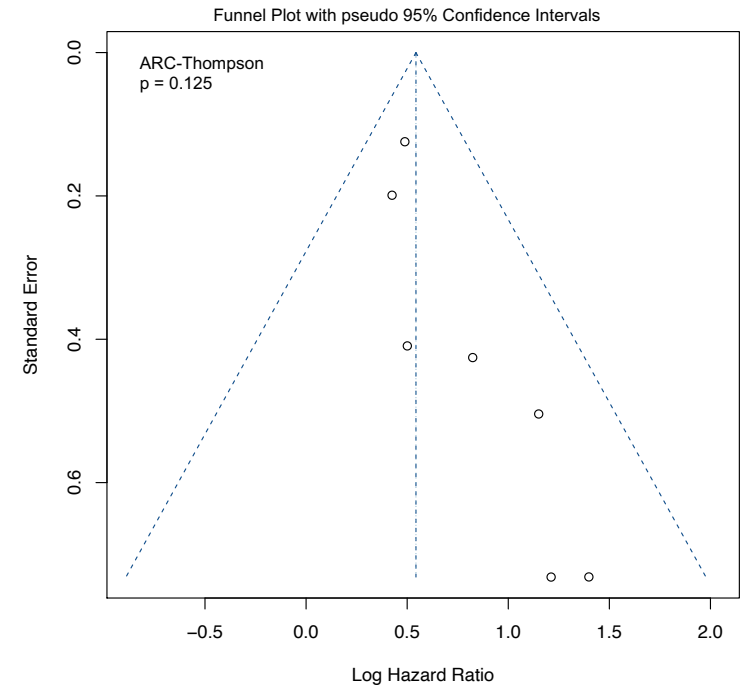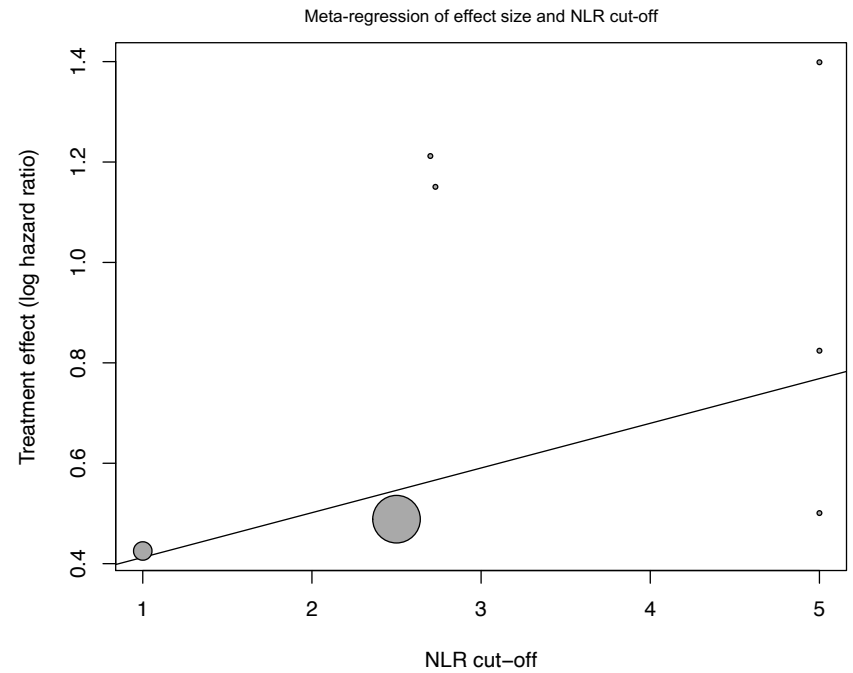

Supplementary Figure 116 - NLR: OS in STS (Synovial Sarcoma)

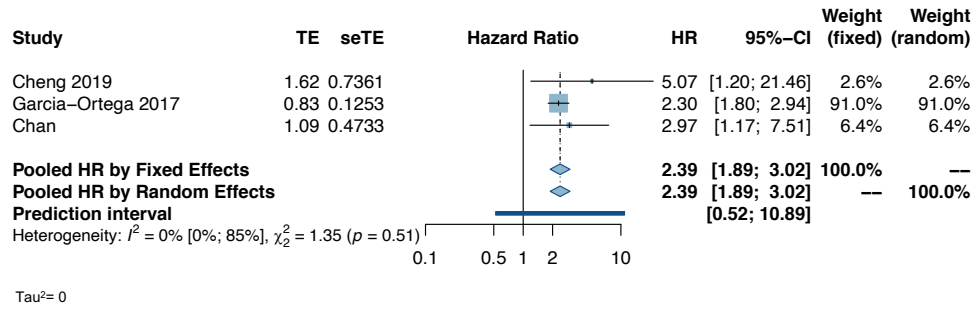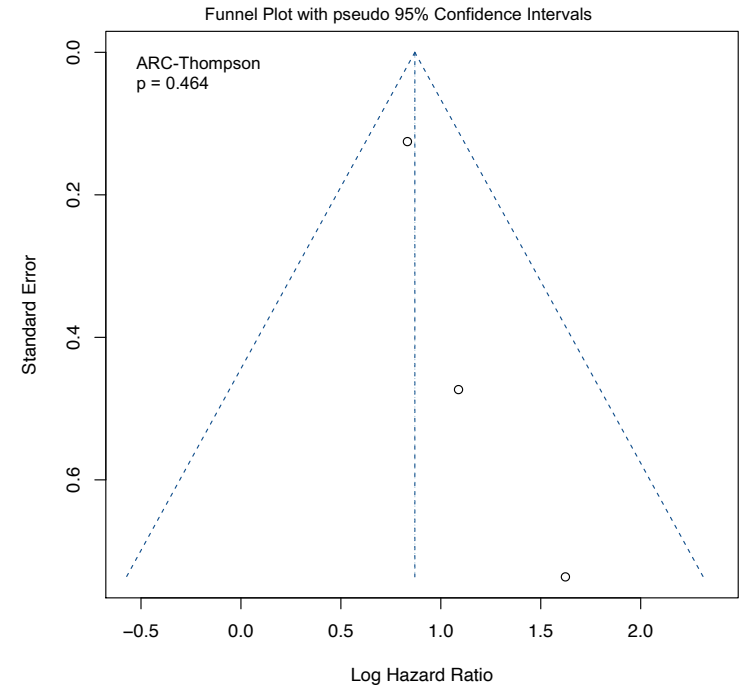

Supplementary Figure 117 - NLR: OS in STS (Liposarcoma)

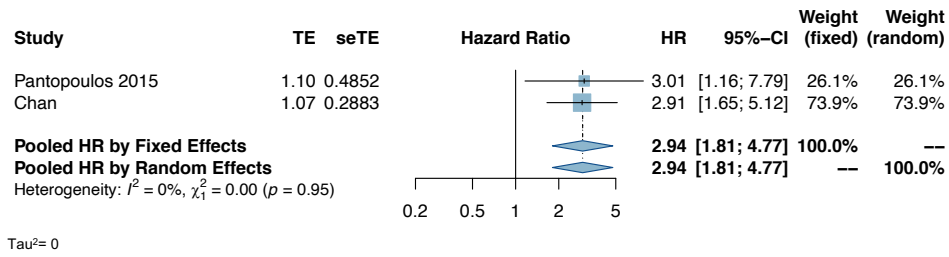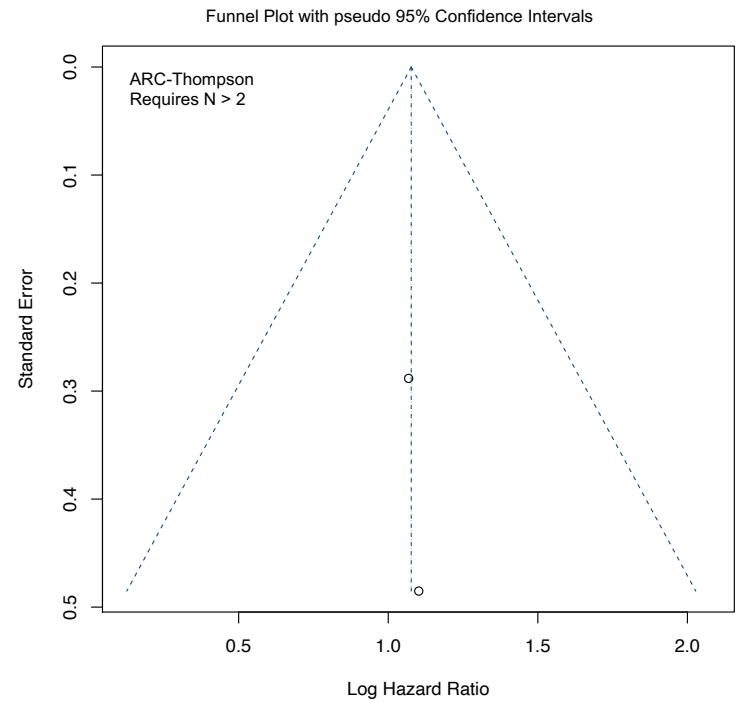

### Supplementary Figure 118 - NLR: OS in Multiple Myeloma

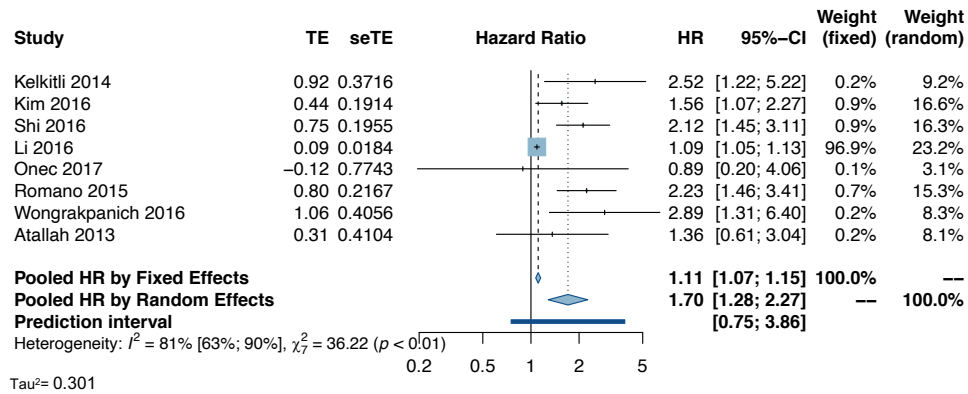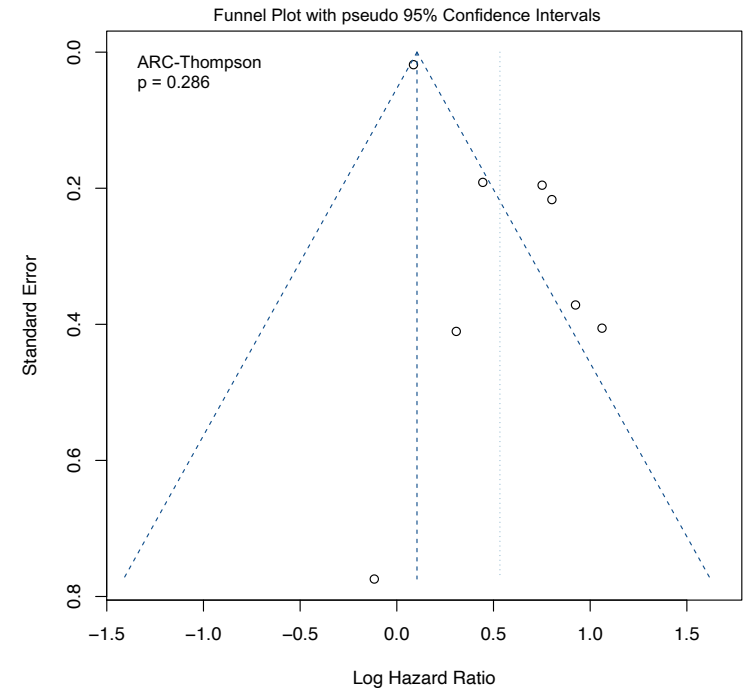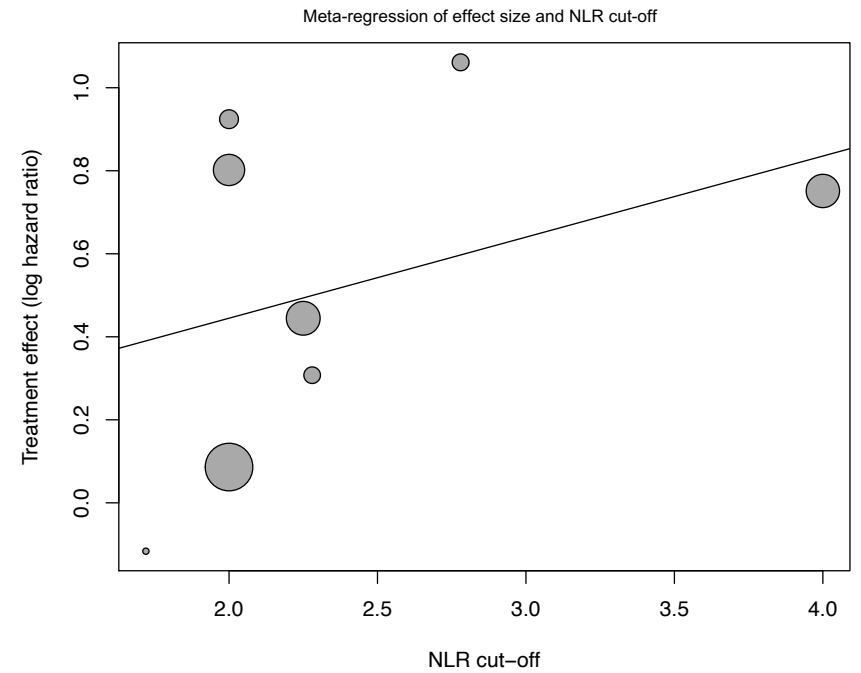

### Supplementary Figure 119 - NLR: PFS in Multiple Myeloma

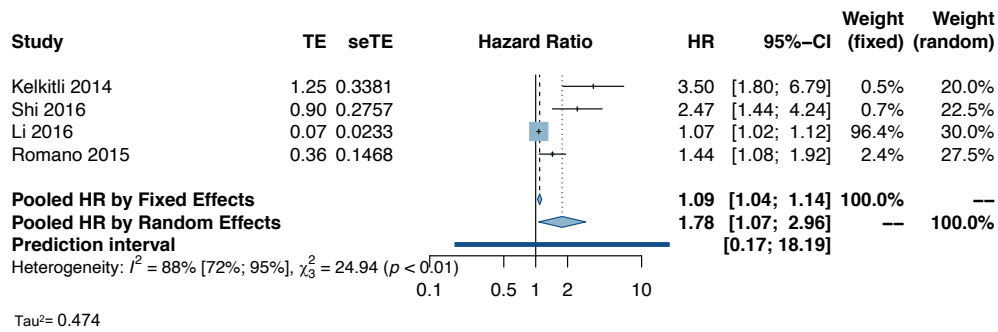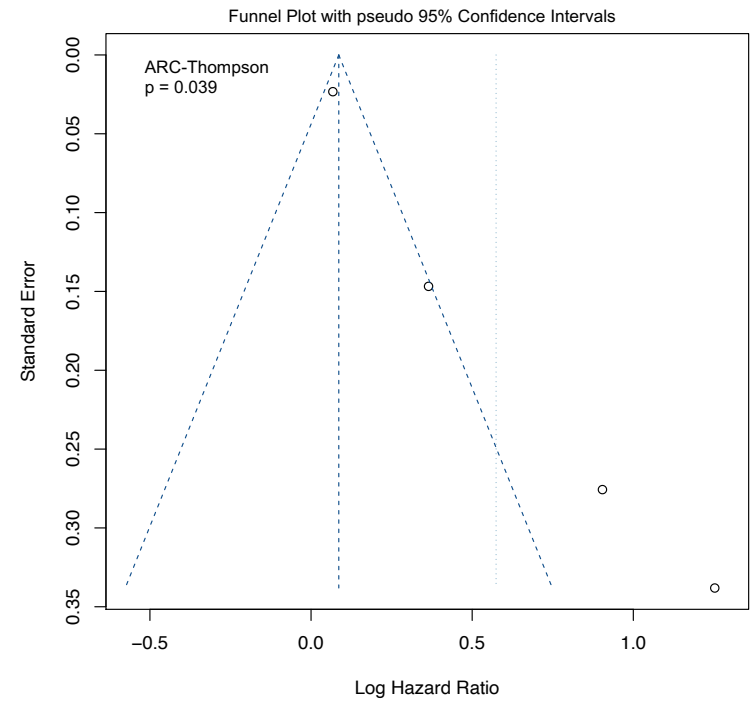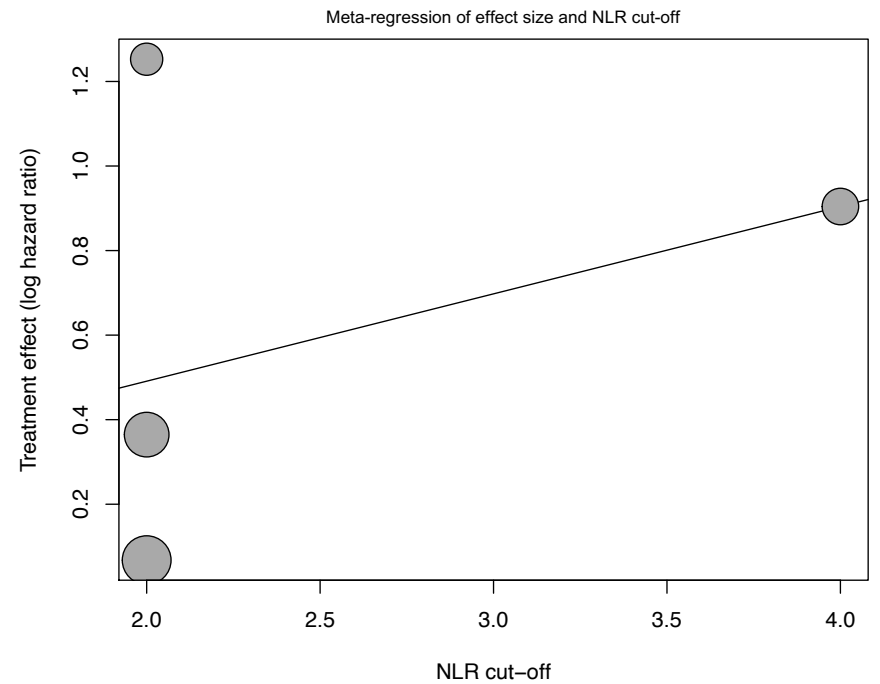



Supplementary Figure 120 - NLR: OS in Nivolumab

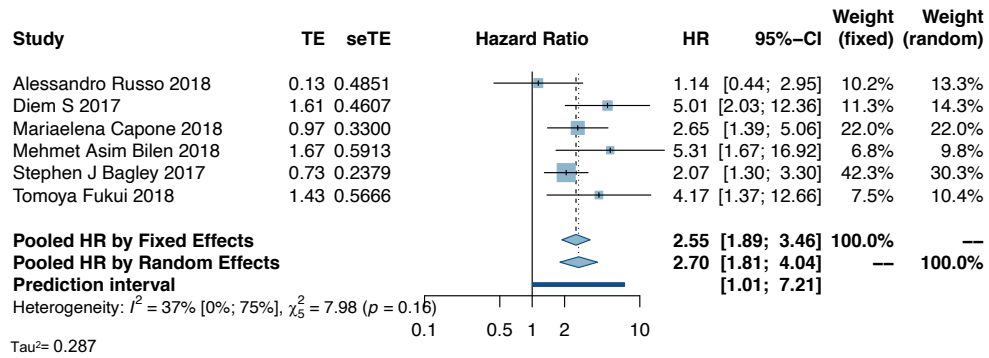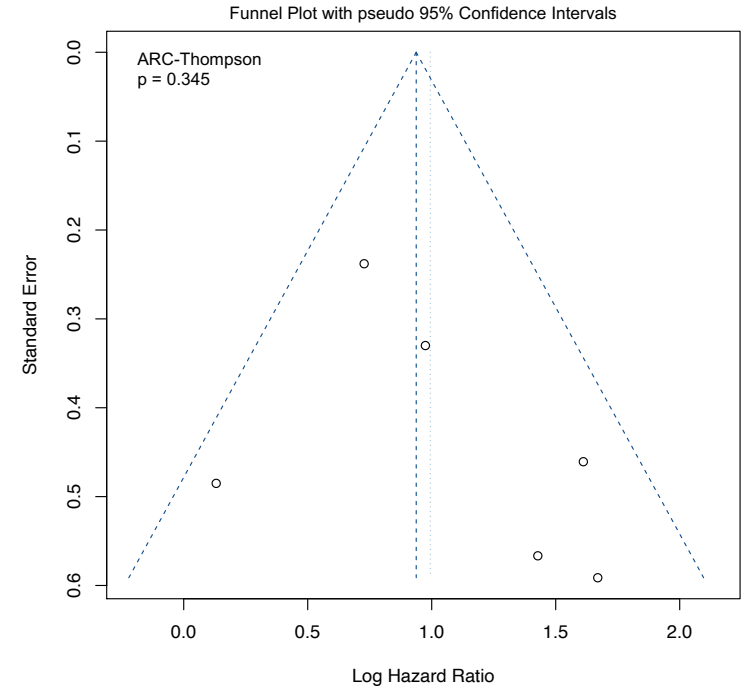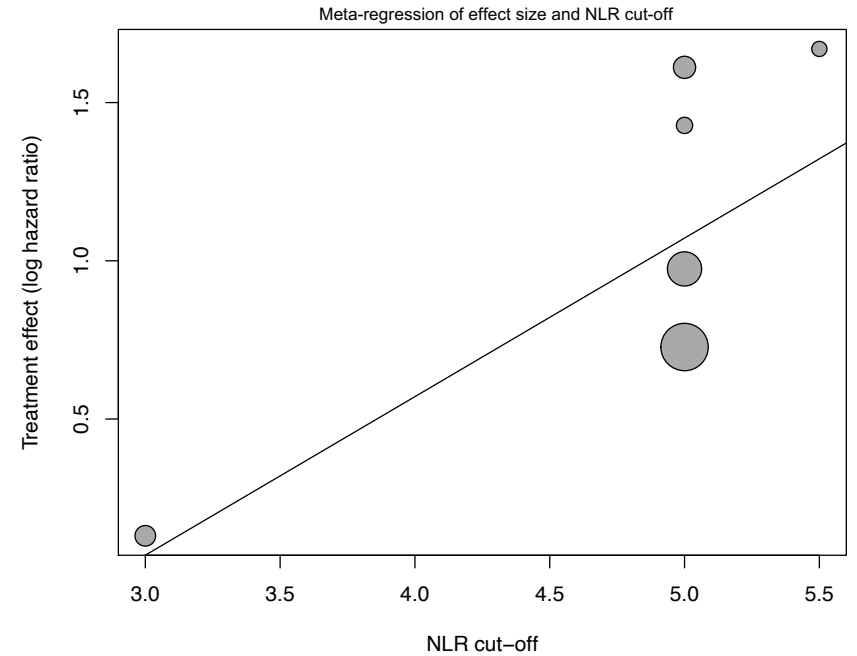

### Supplementary Figure 121 - NLR: PFS in Nivolumab

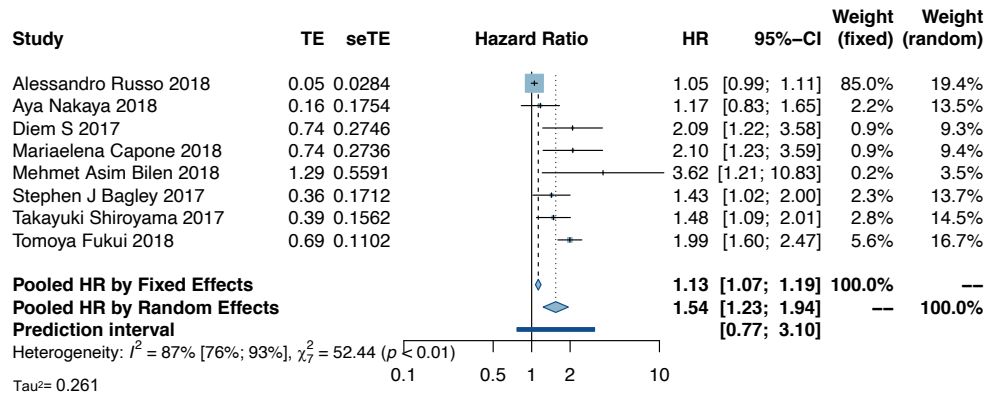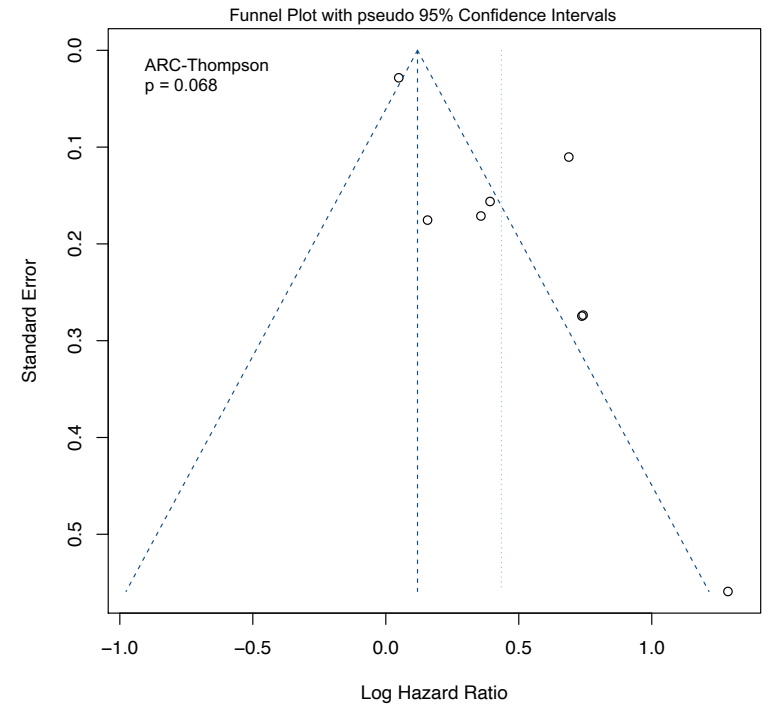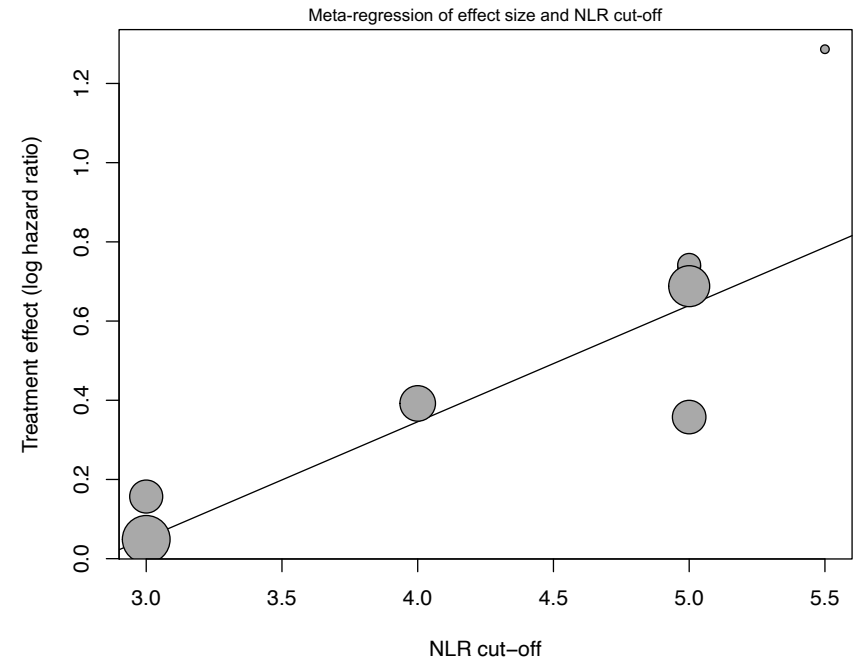

### Supplementary Figure 122 - NLR: OS in Ipilimumab

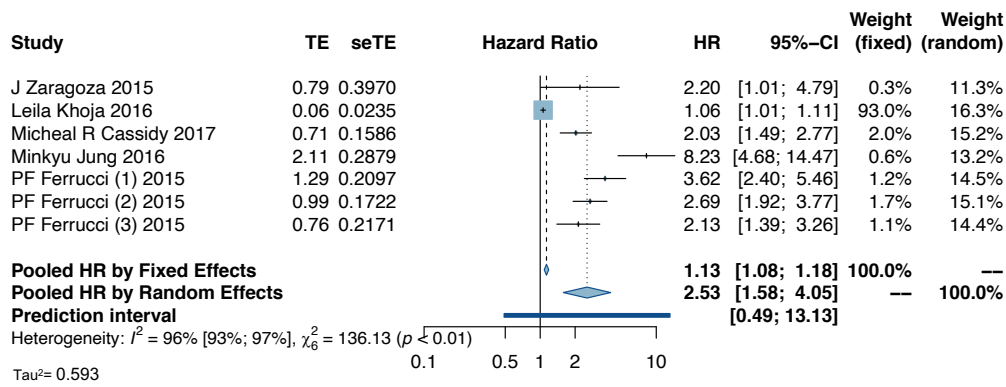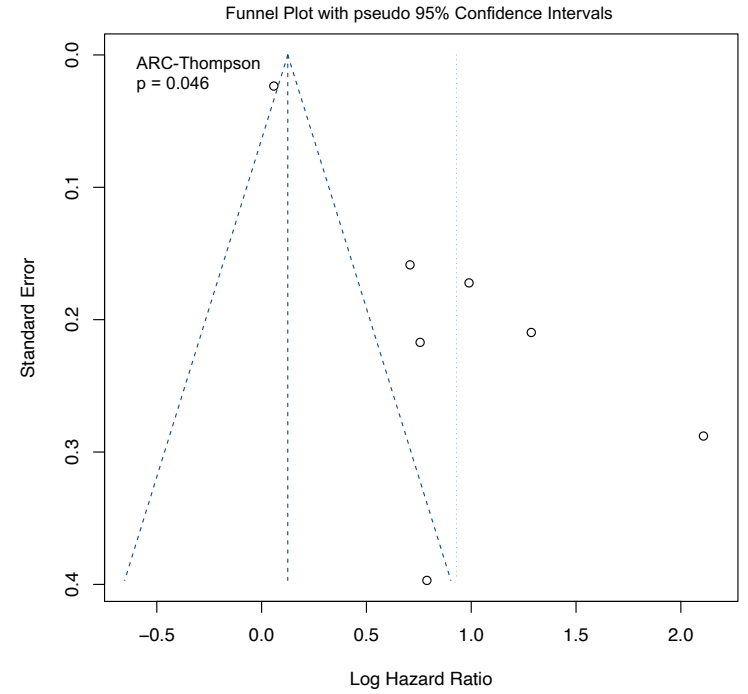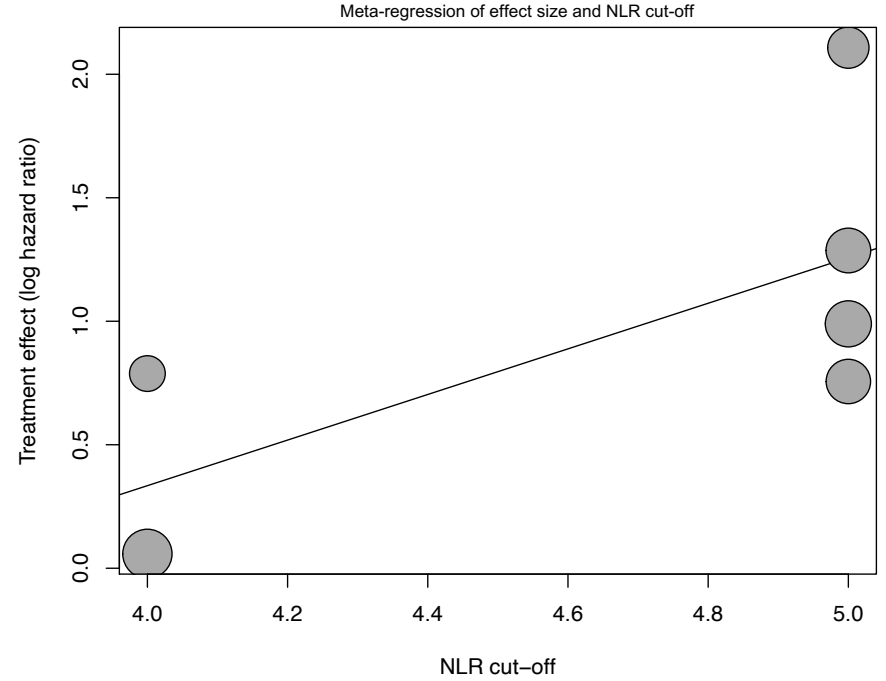

Supplementary Figure 123 - NLR: PFS in Ipilimumuab

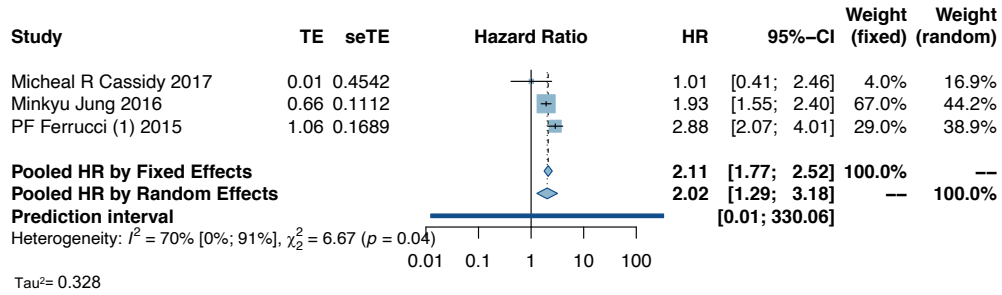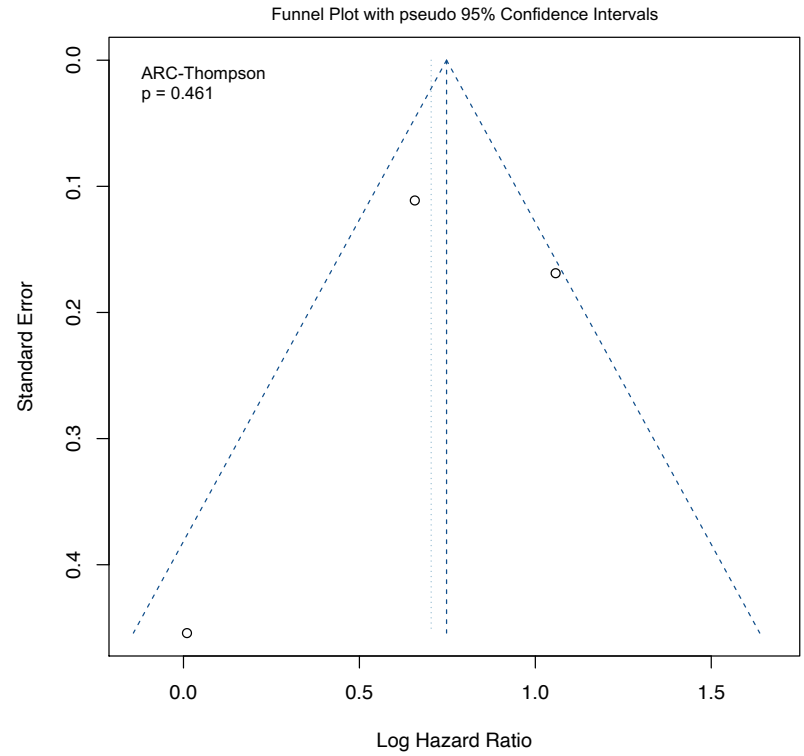

### Supplementary Figure 124 - NLR: OS in Oesophageal

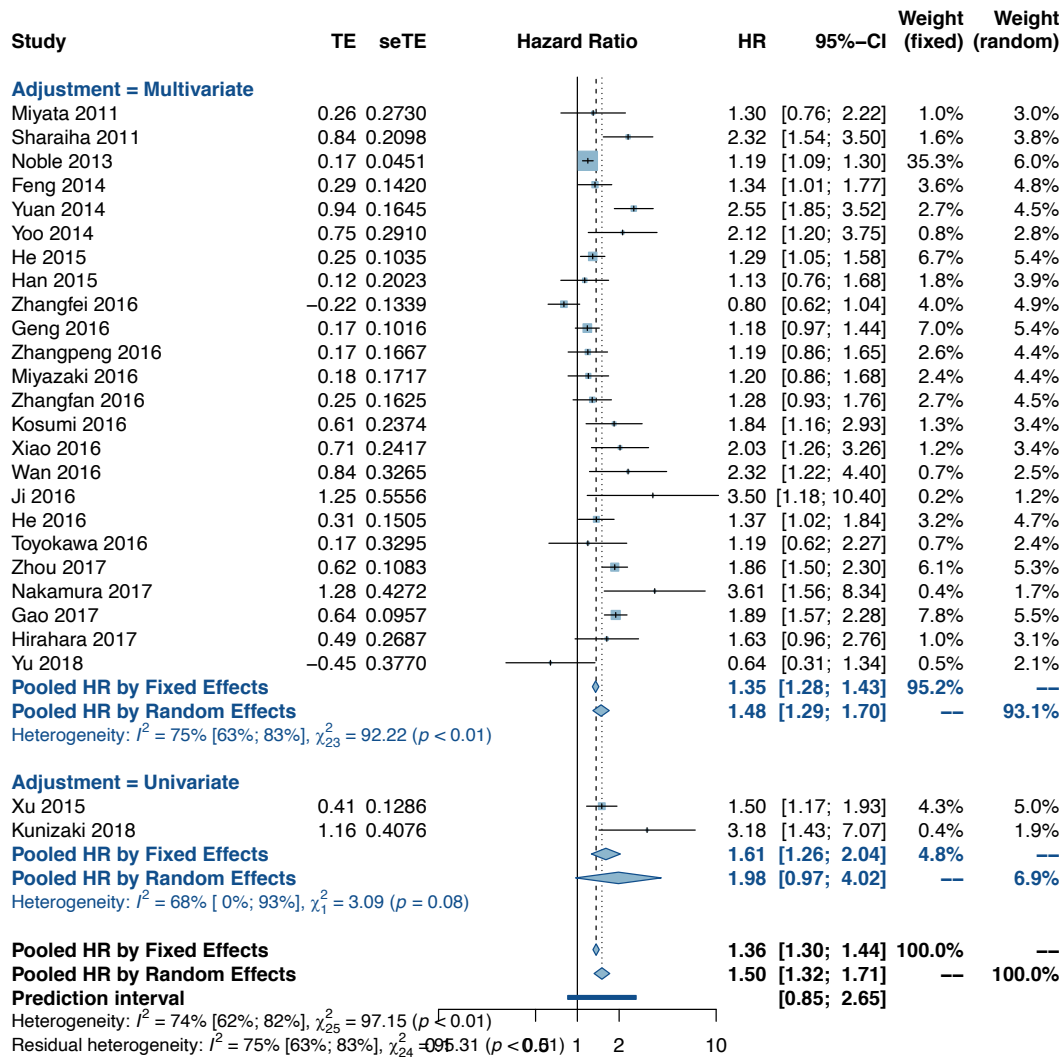

Tau<sup>2</sup> = 0.267

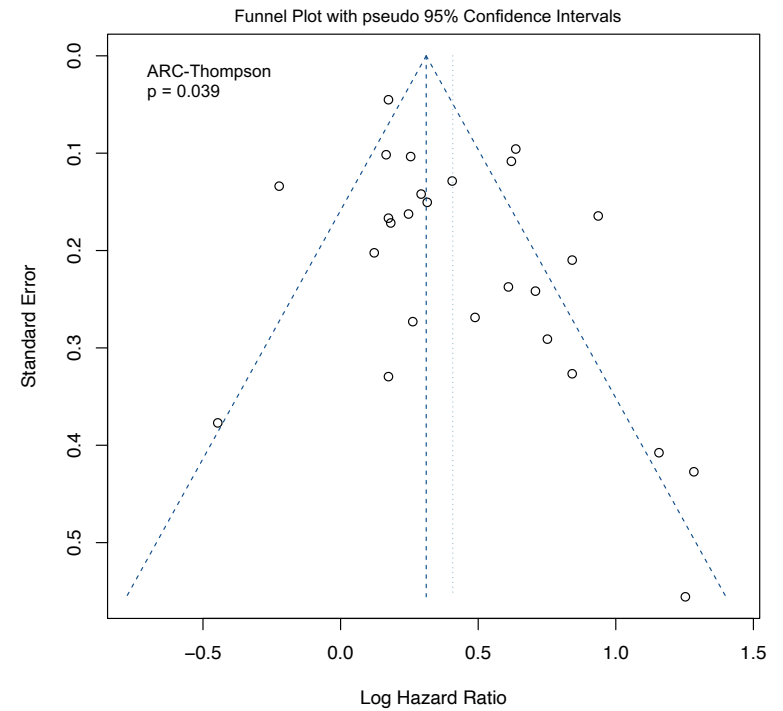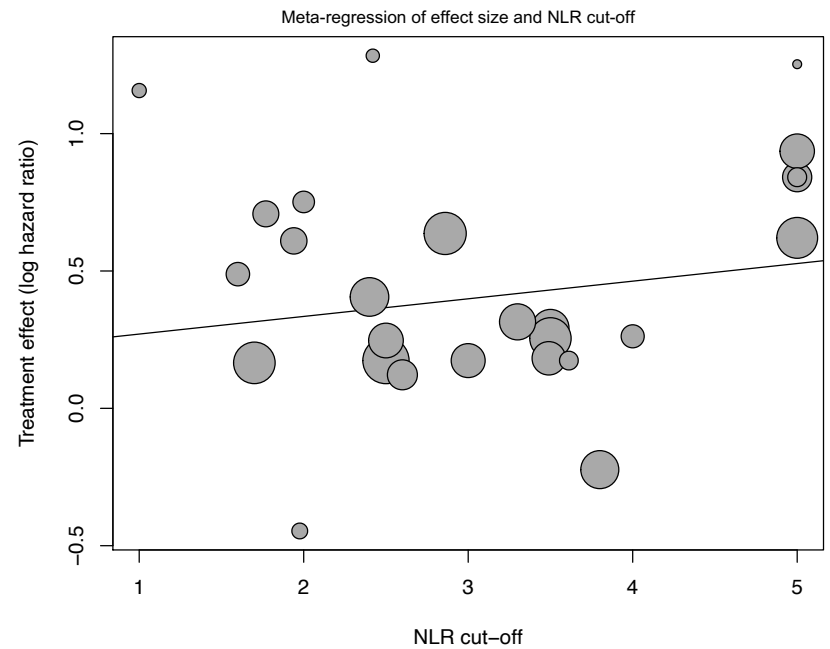

### Supplementary Figure 125 - NLR: OS in Oesophageal (Surgery)

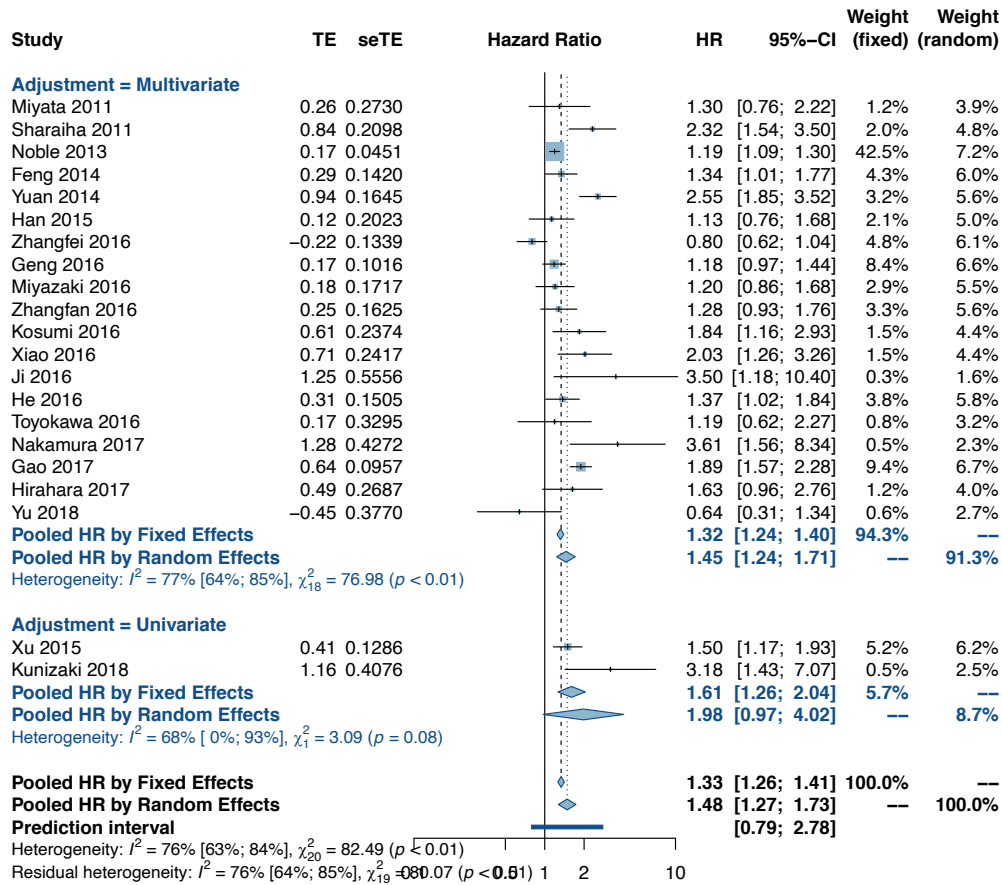

Tau<sup>2</sup> = 0.289

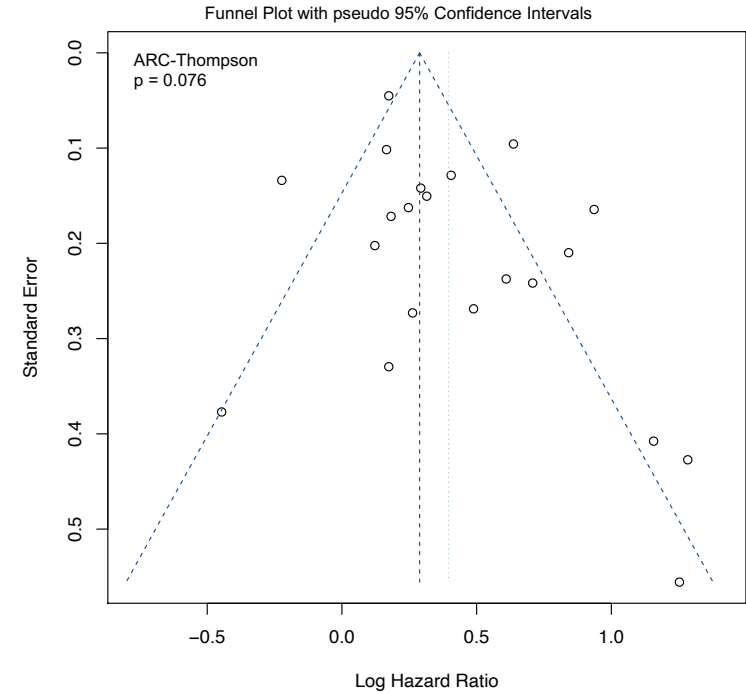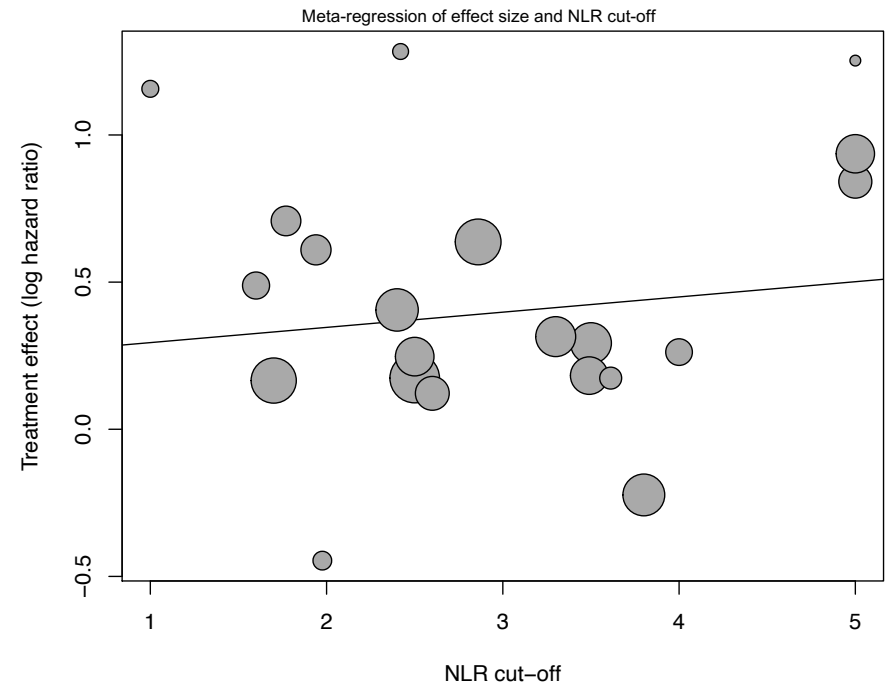

Supplementary Figure 126 - NLR: CSS in Oesophageal

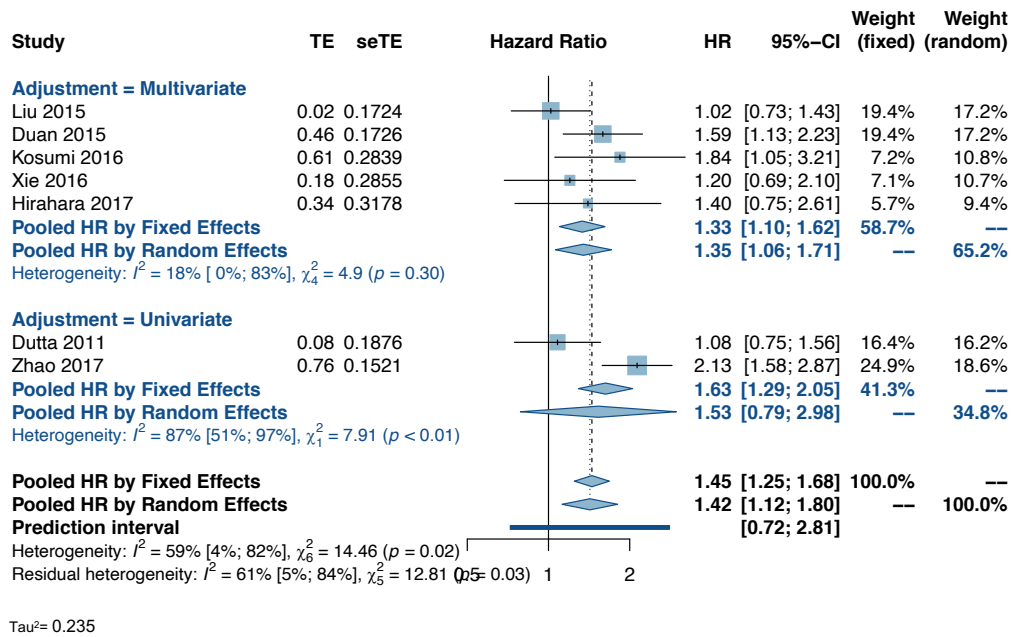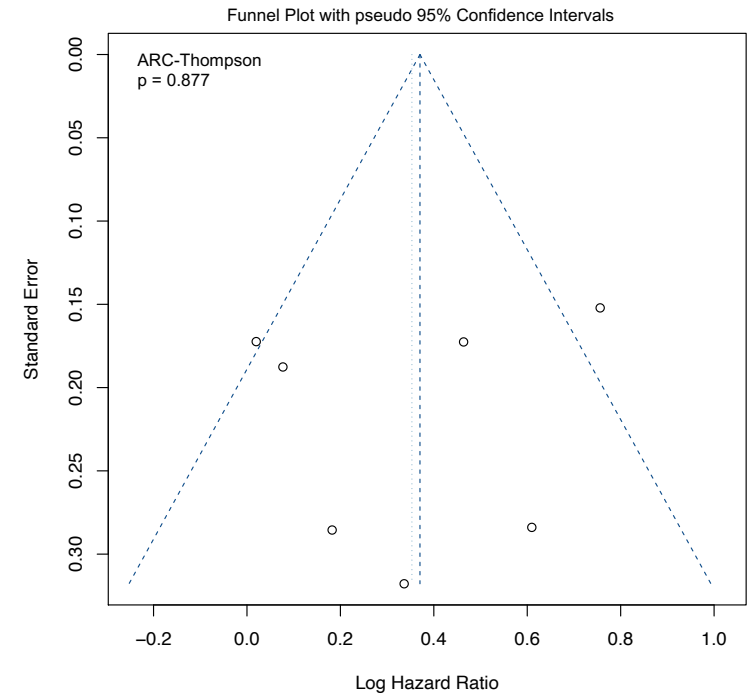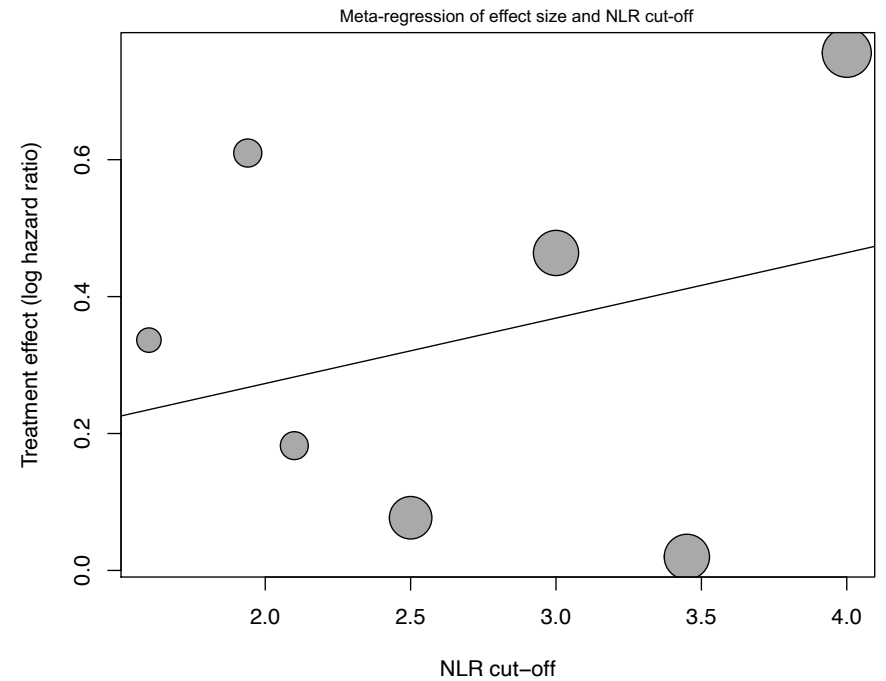

Supplementary Figure 127 - NLR: RFS in Oesophageal

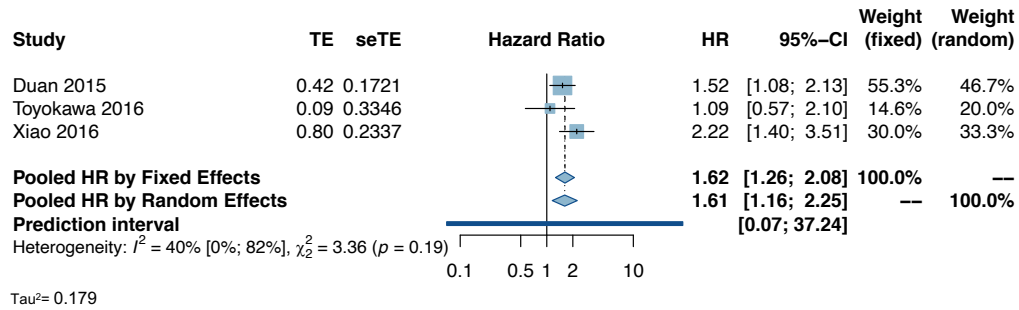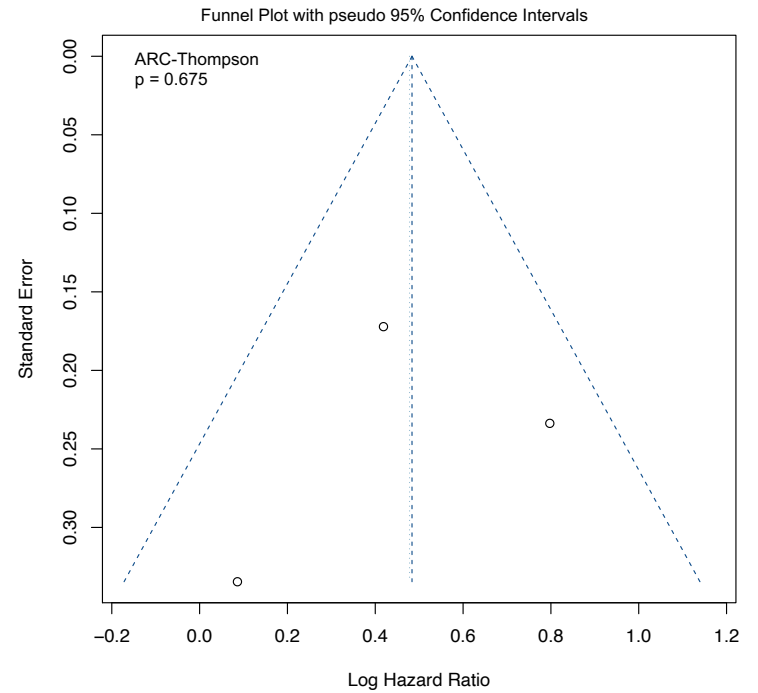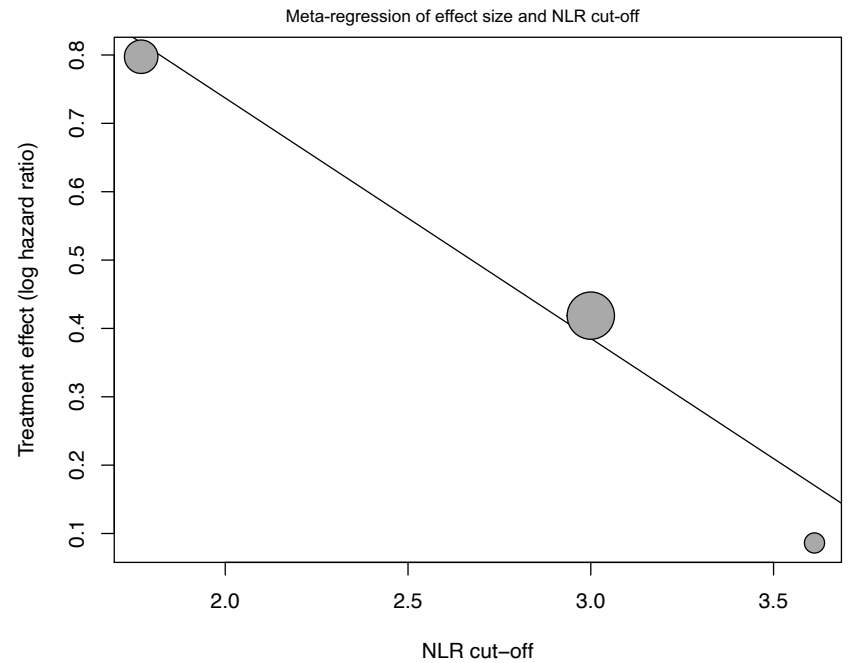



Supplementary Figure 128 - NLR: OS in Oesophageal (DCRT)

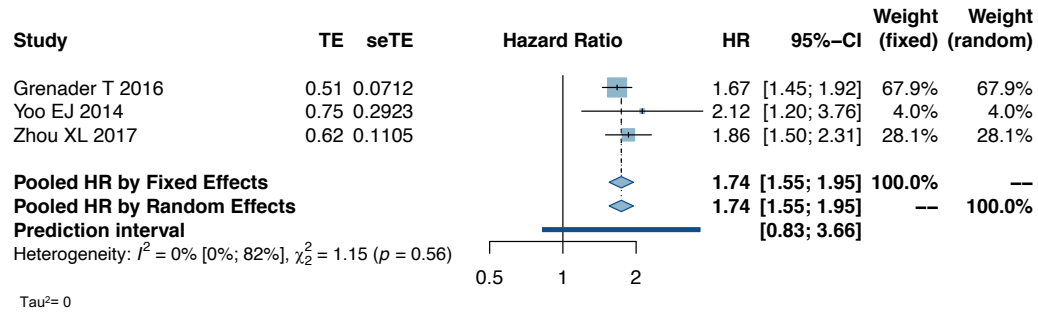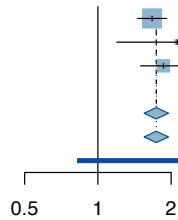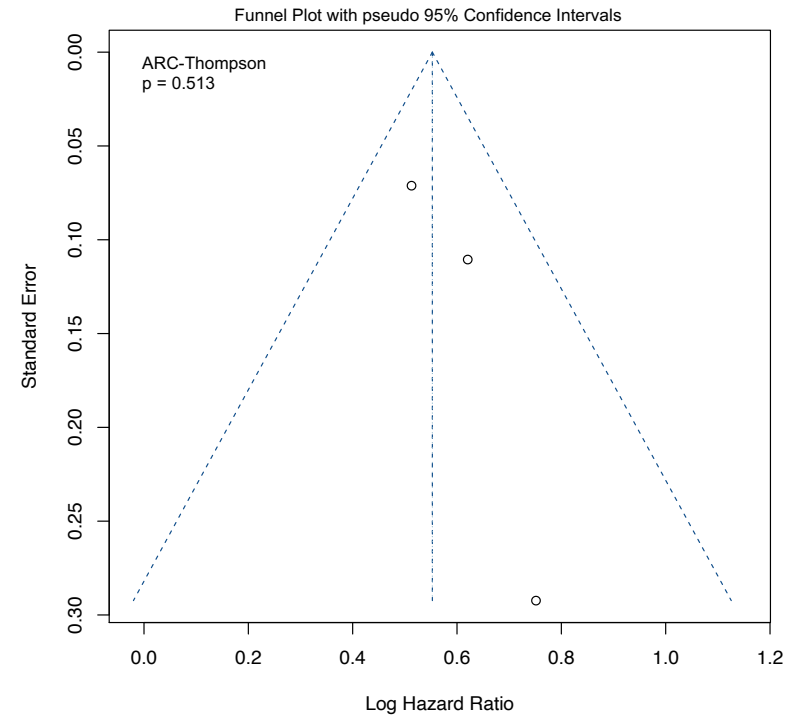

Supplementary Figure 129 - NLR: OS in Oesophageal (Neo+Surgery)

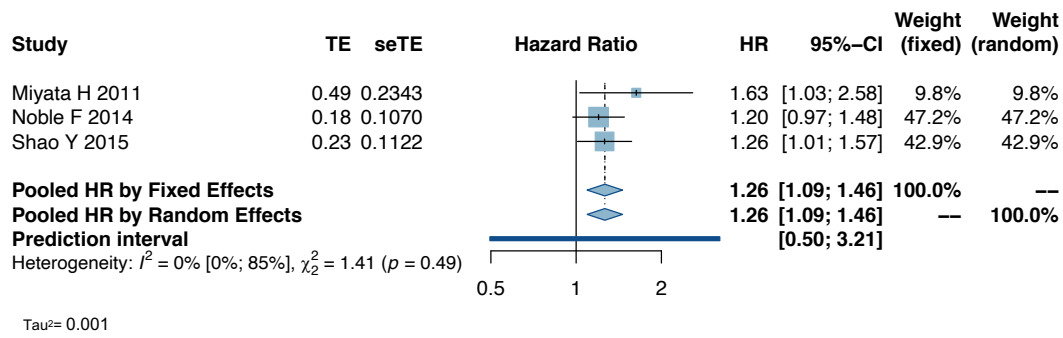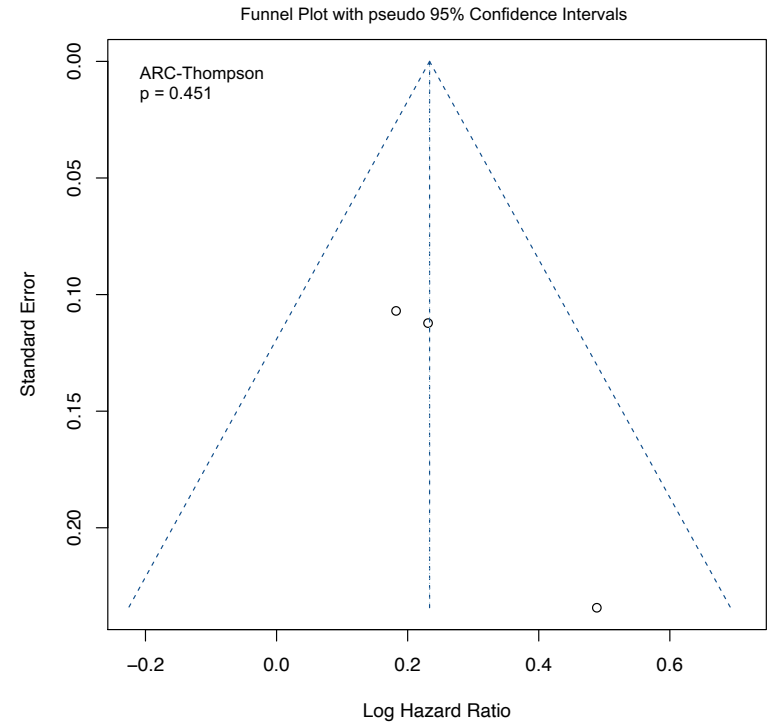

**Supplementary Figure 130 - NLR: OS in Oesophageal (No Surgery)**

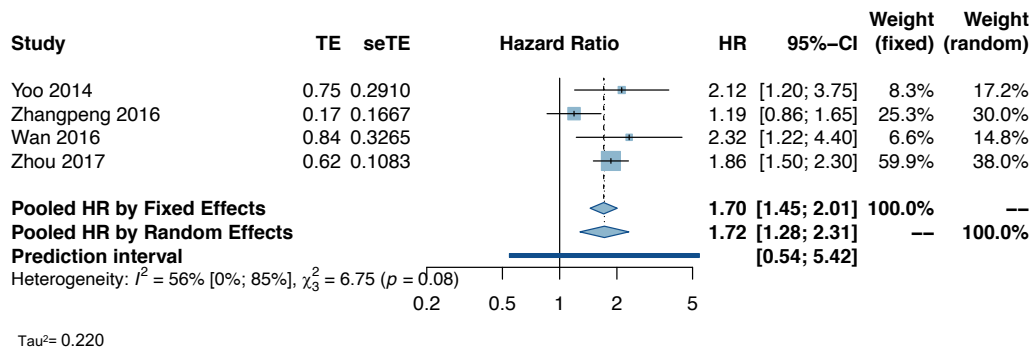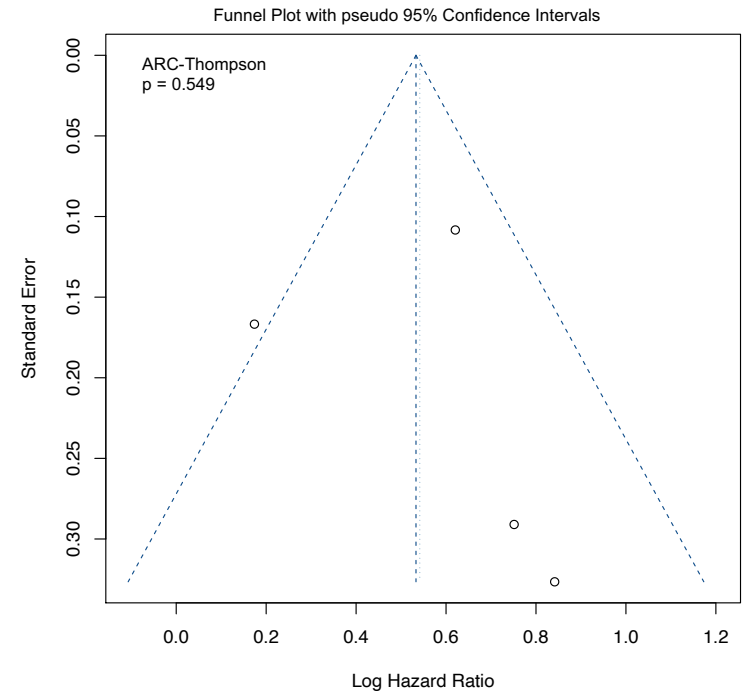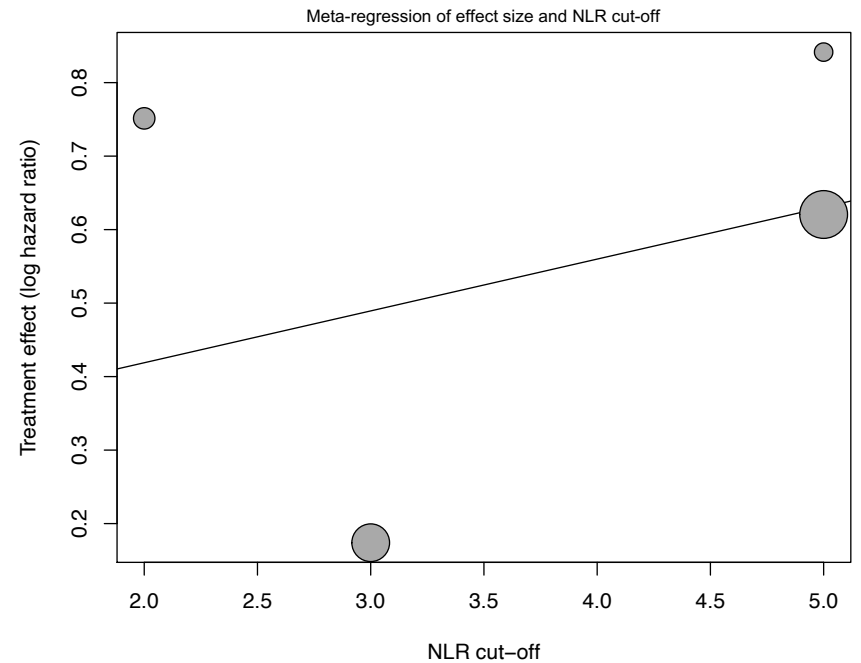

Supplementary Figure 131 - NLR: OS in Oesophageal SCC

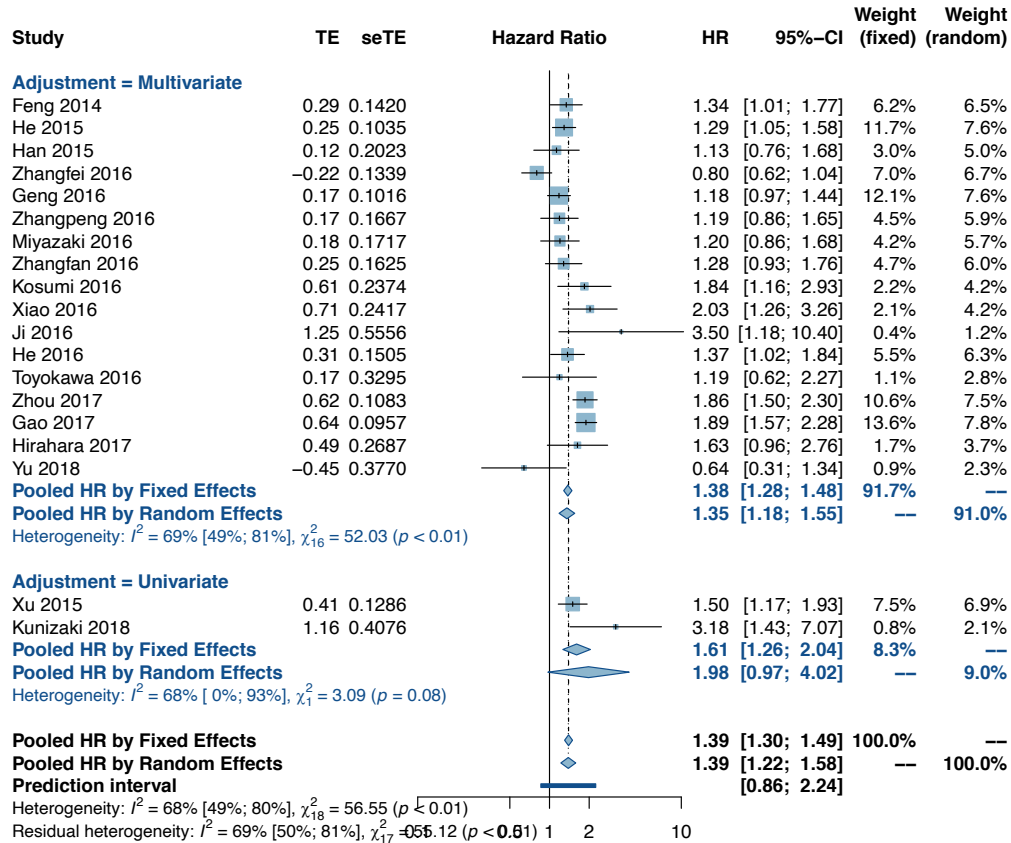

Tau<sup>2</sup> = 0.217

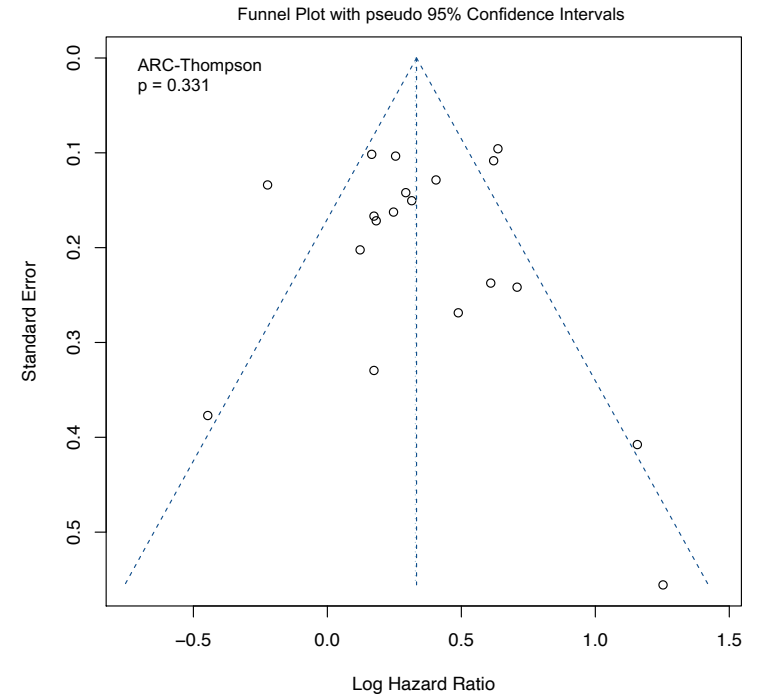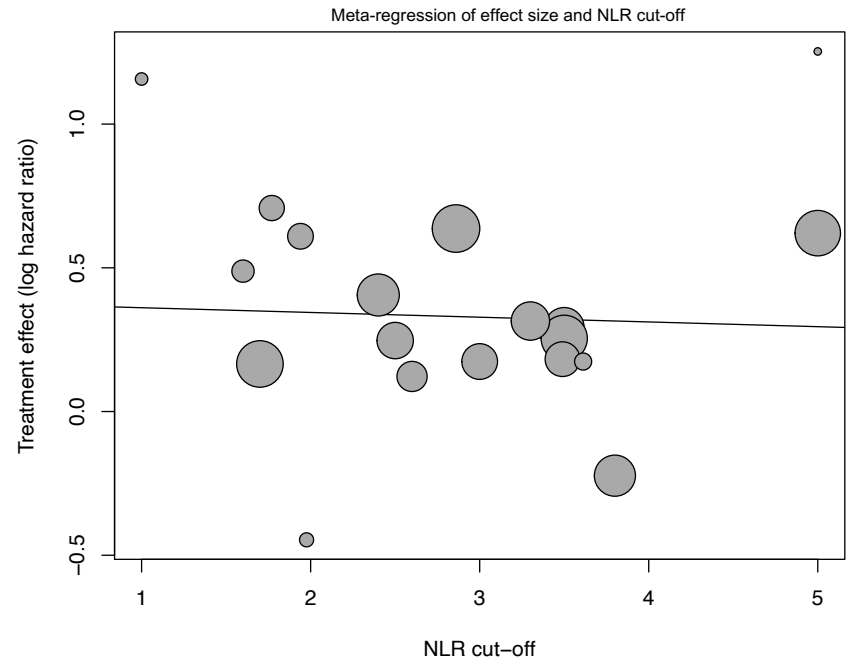

**Supplementary Figure 132 - NLR: OS in Oesophageal (Surgery+/-Chemo)**

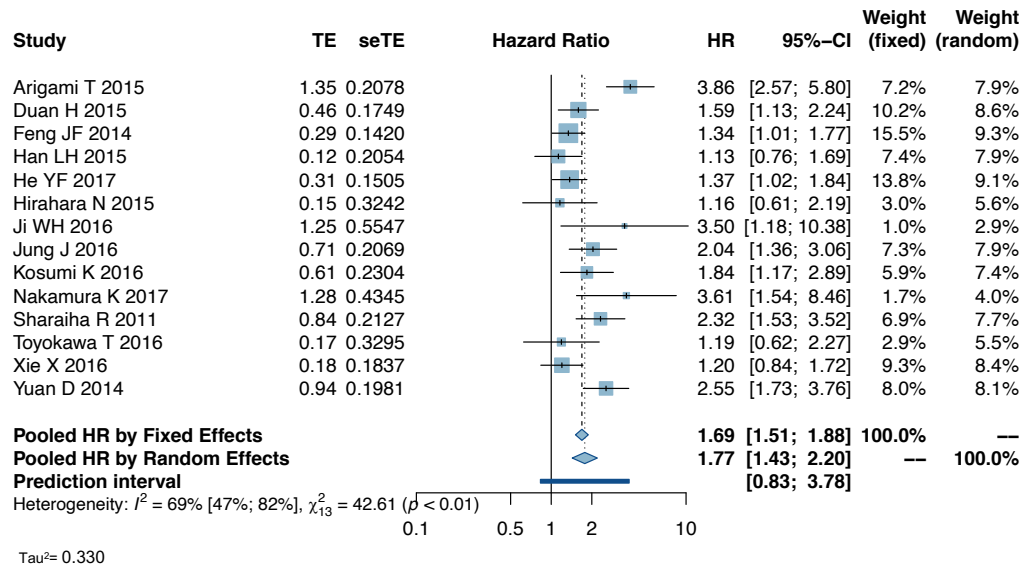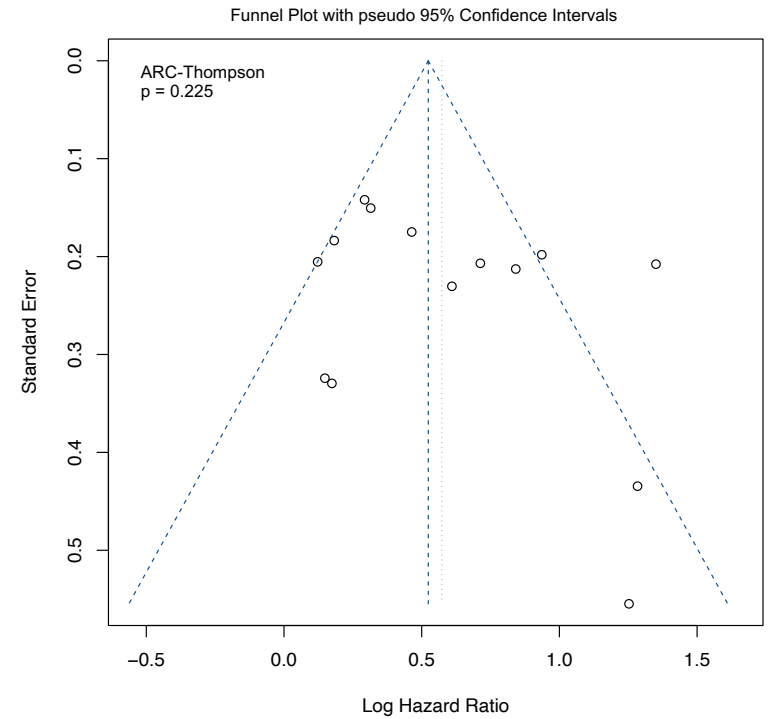

Supplementary Figure 133 - NLR: DFS in Oesophageal

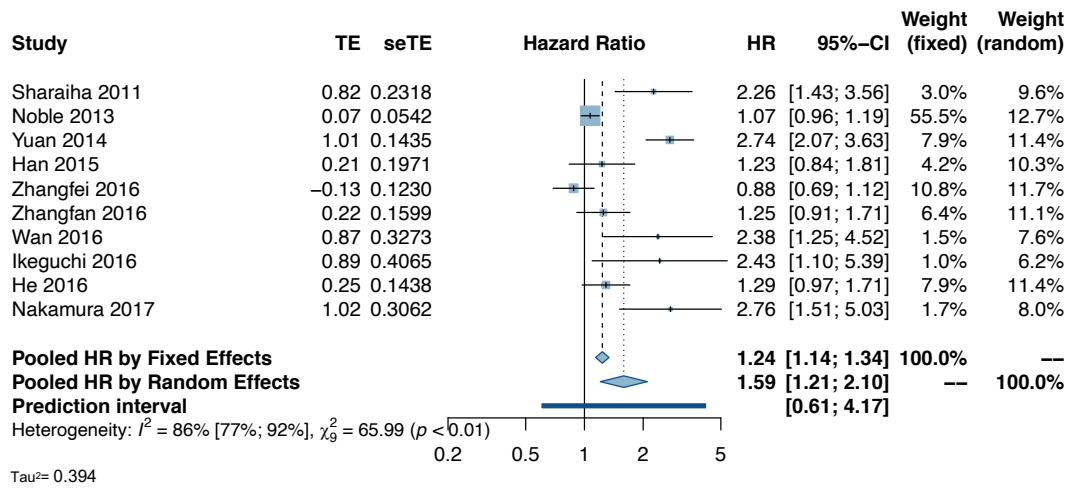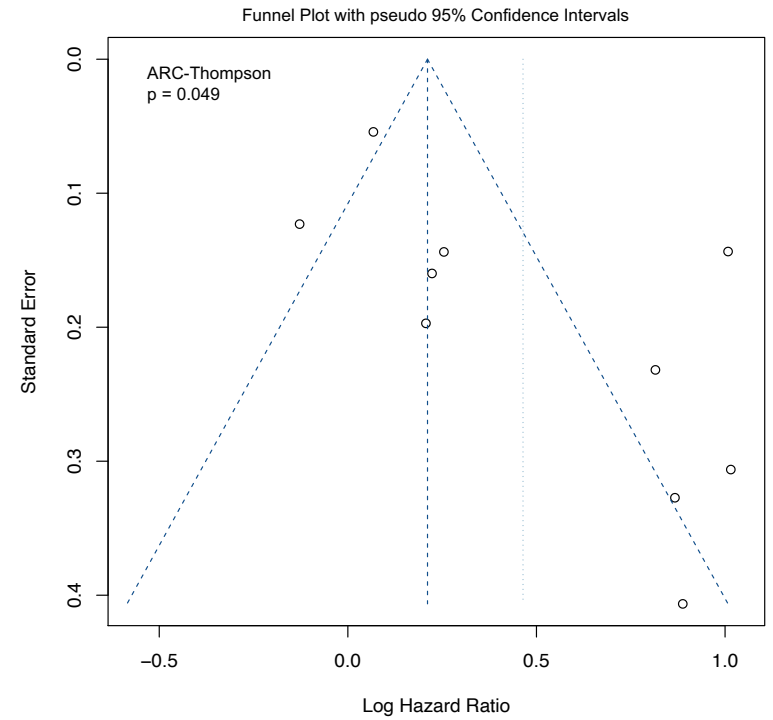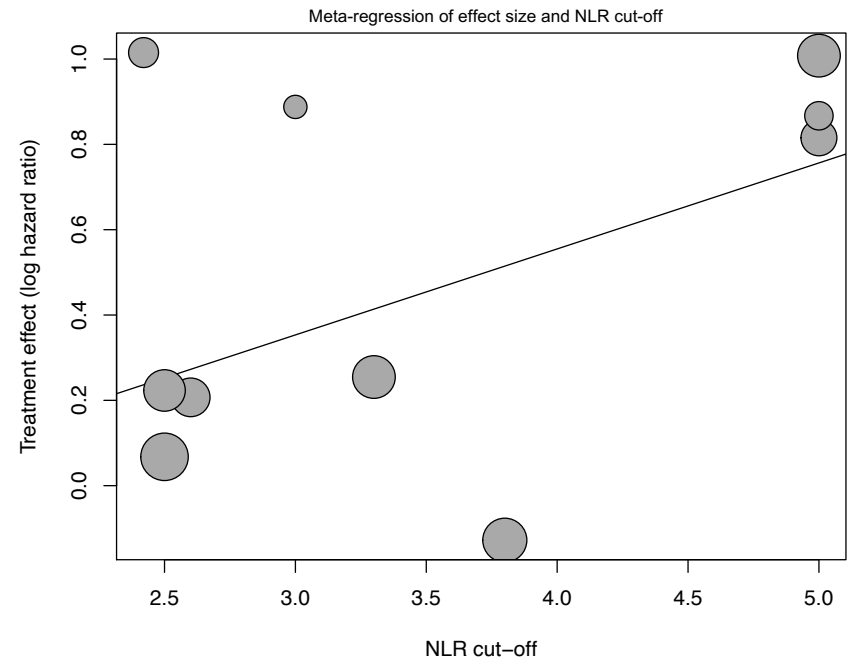

Supplementary Figure 134 - NLR: PFS in Oesophageal

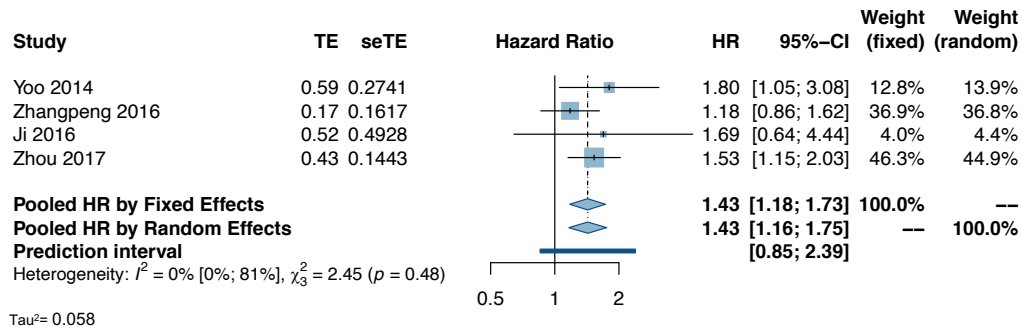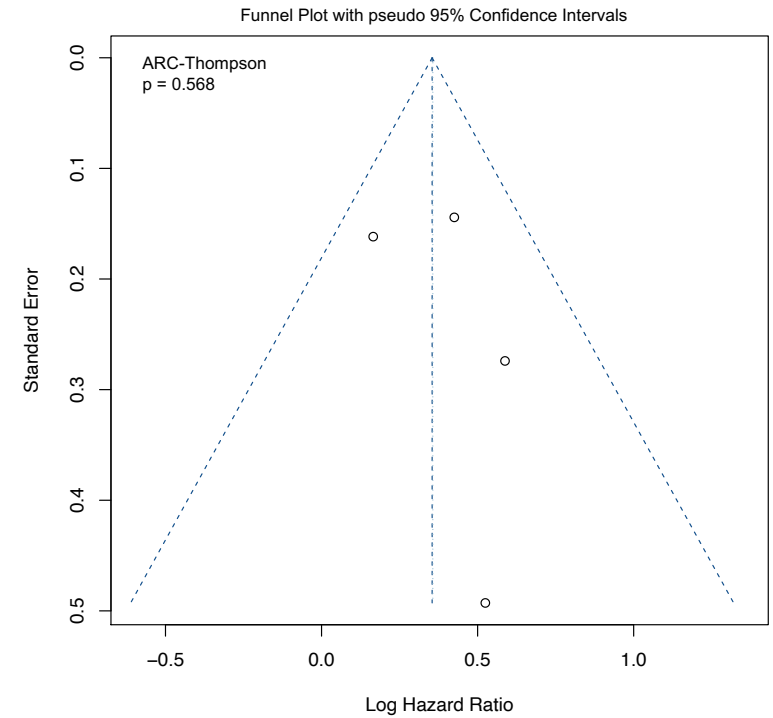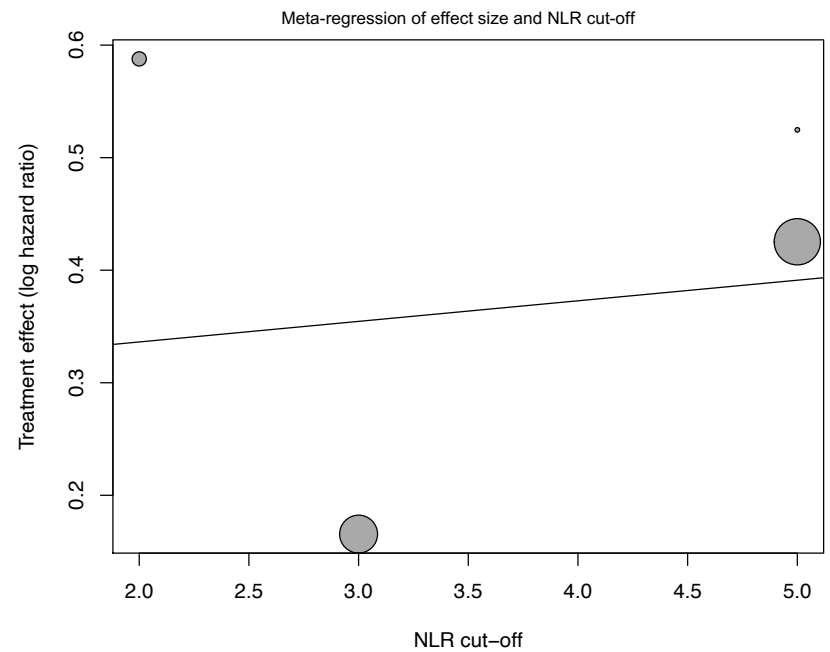

Supplementary Figure 135 - NLR: DFS in Colorectal (SR)

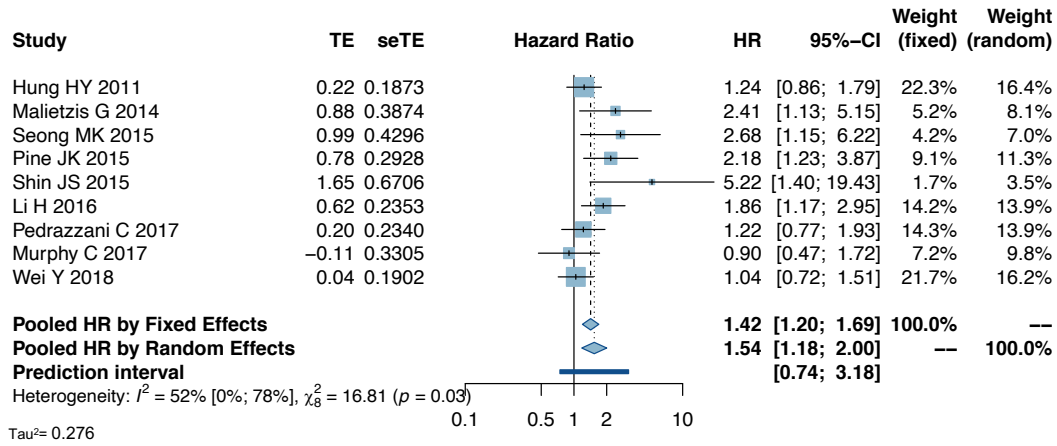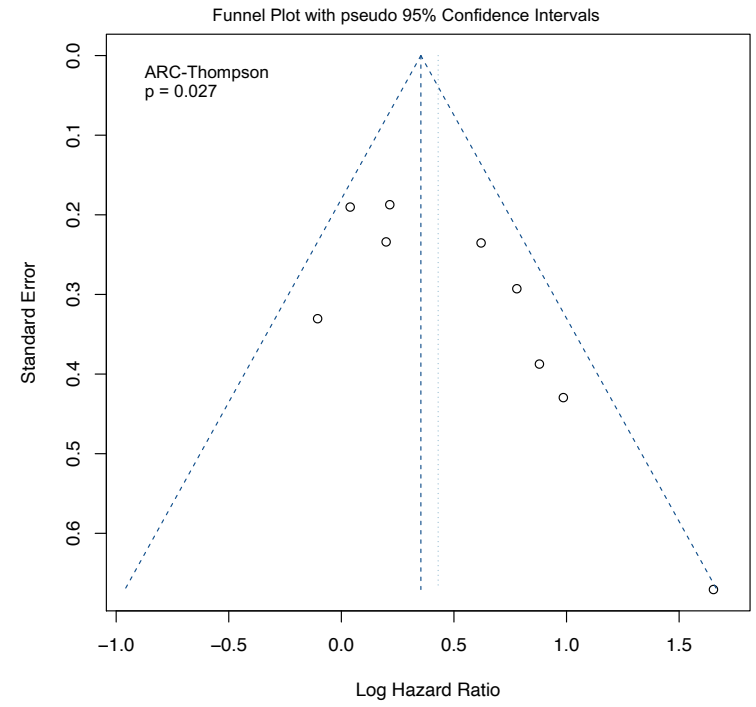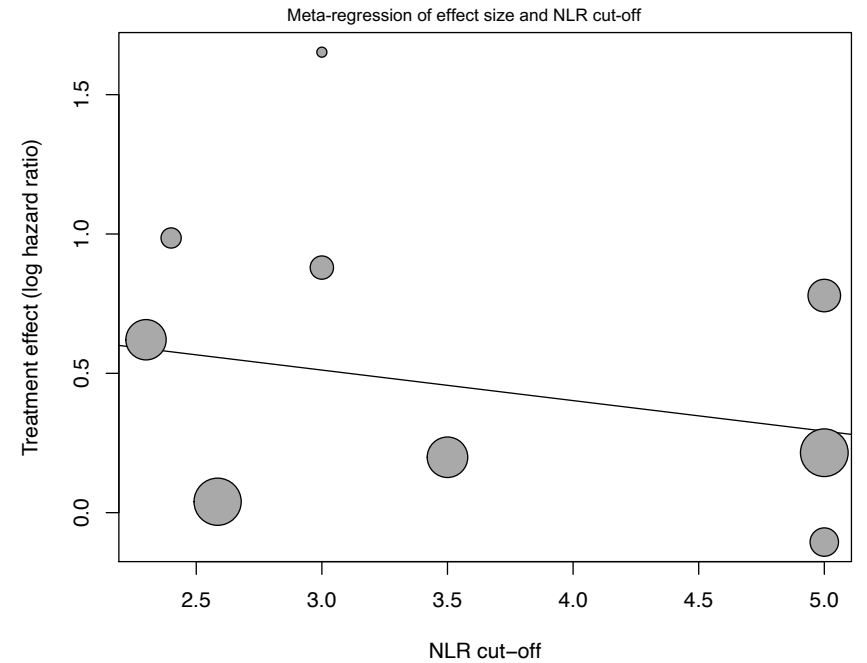



Supplementary Figure 136 - NLR: OS in Colorectal (SR)

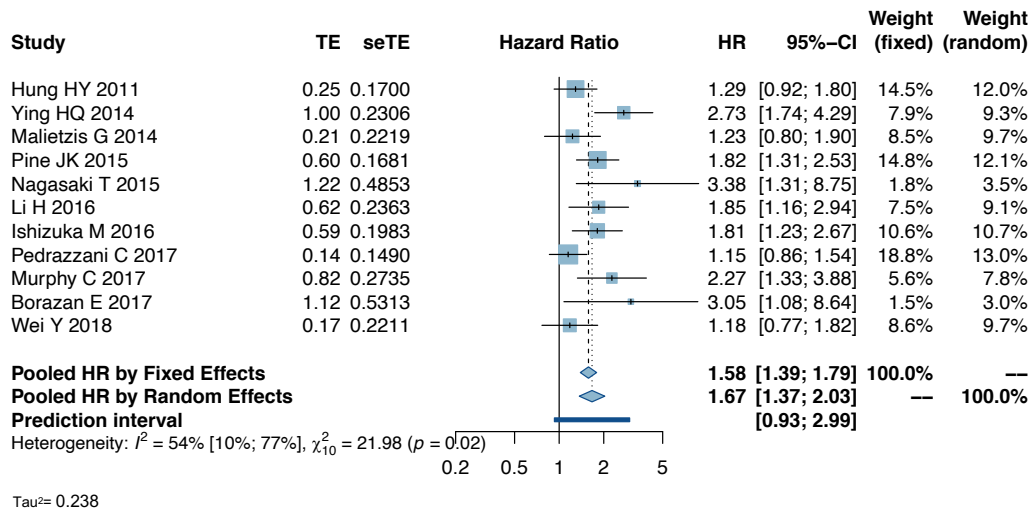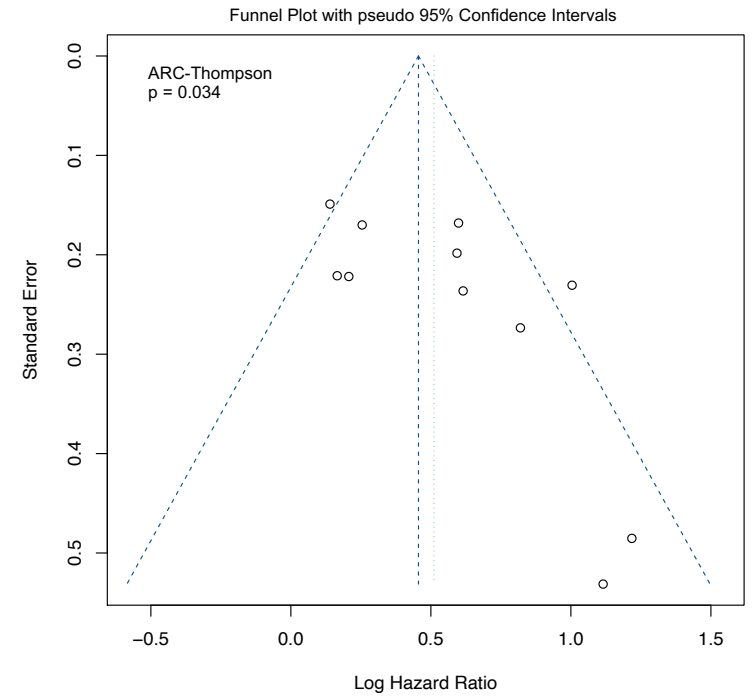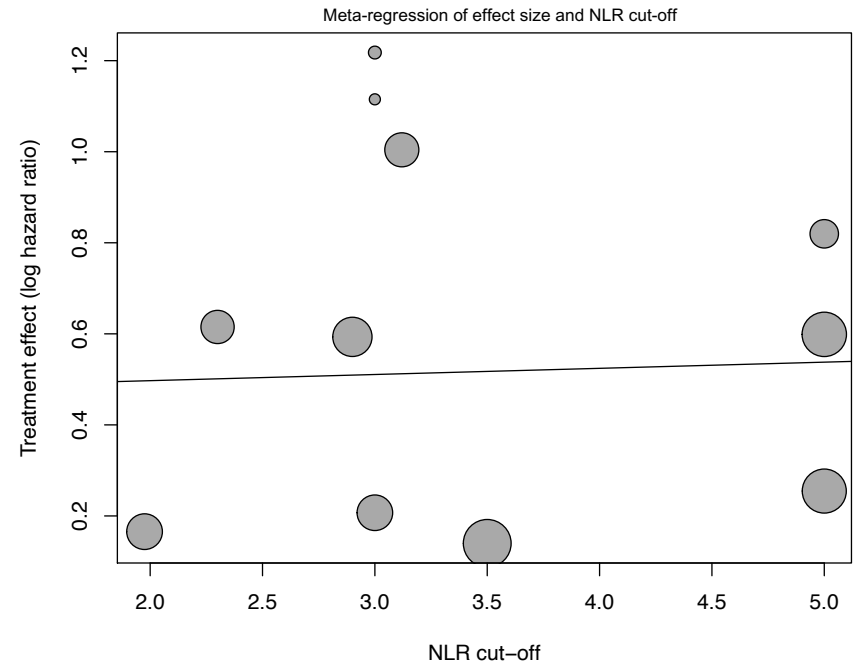

Supplementary Figure 137 - NLR: RFS in Colorectal (SR)

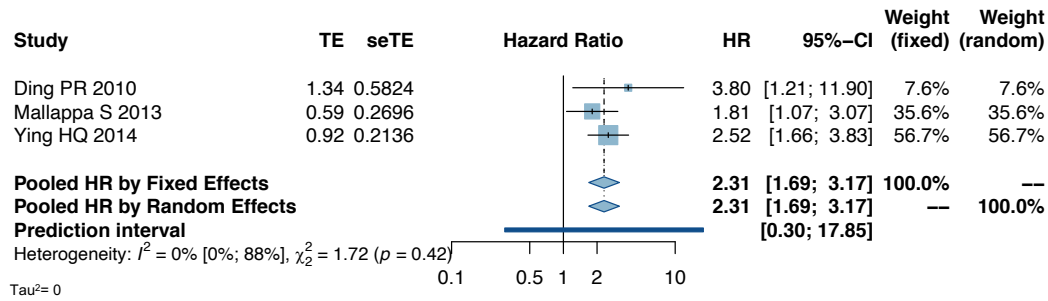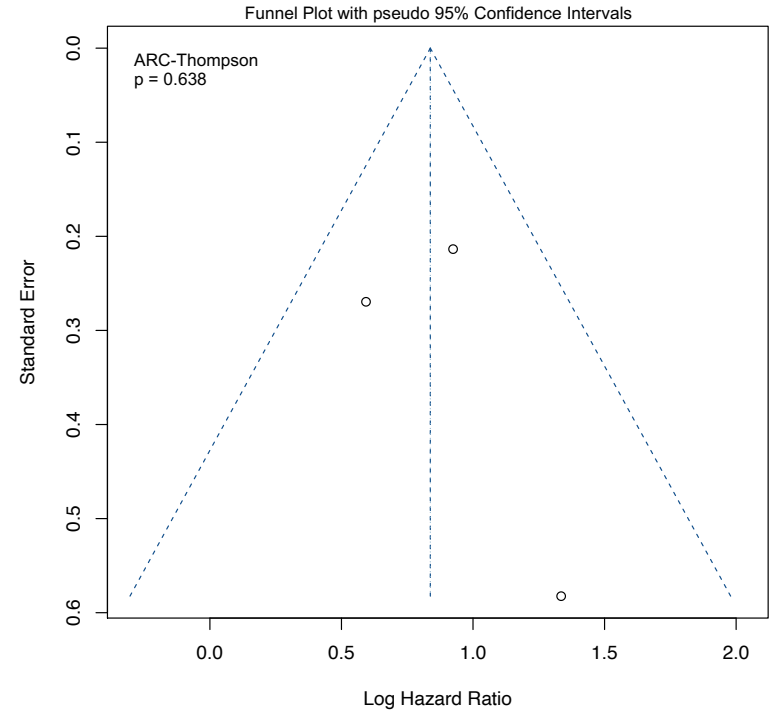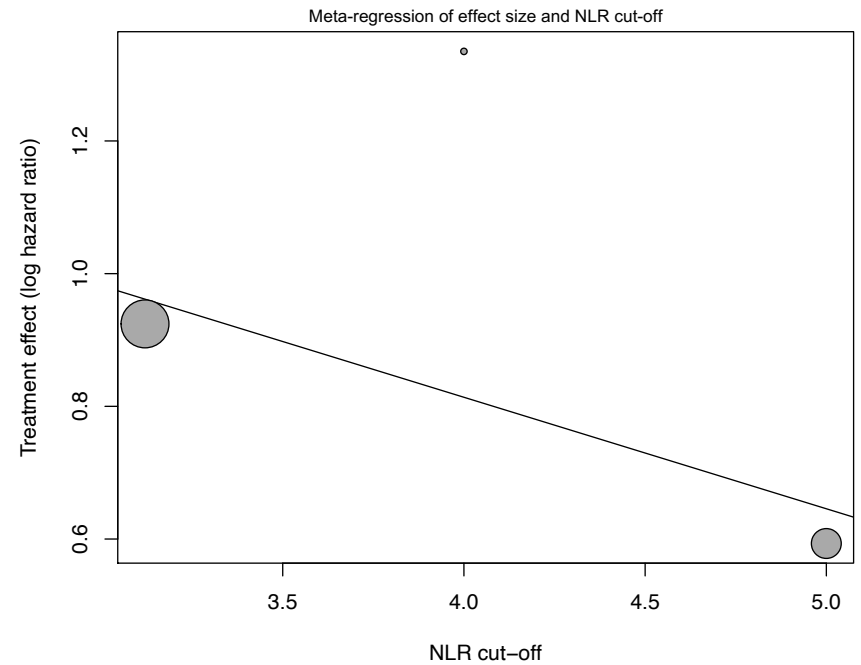

**Supplementary Figure 138 - NLR: OS in Endometrial carcinoma**

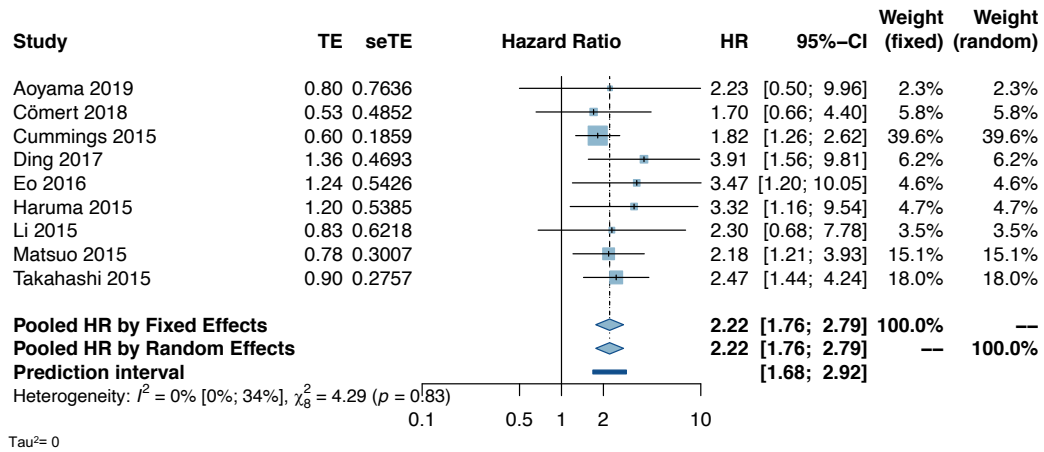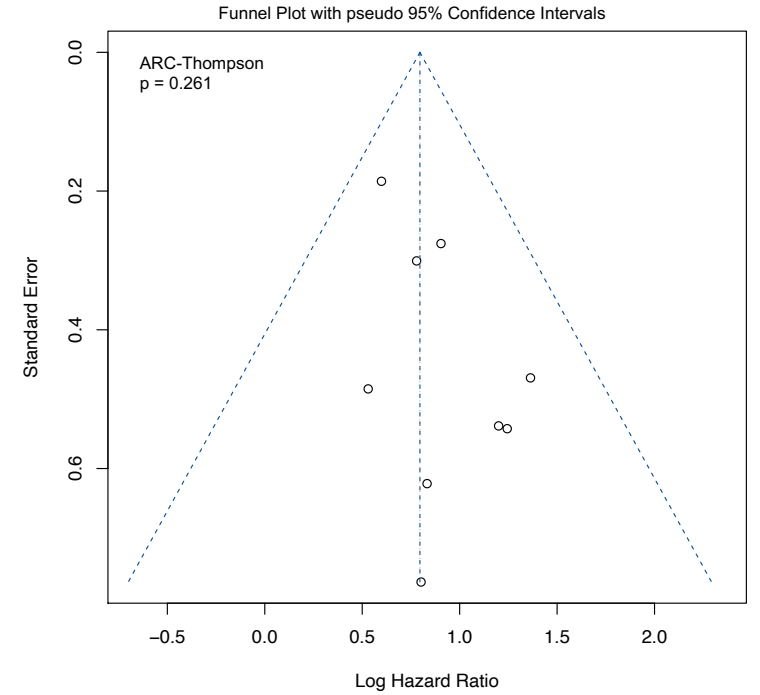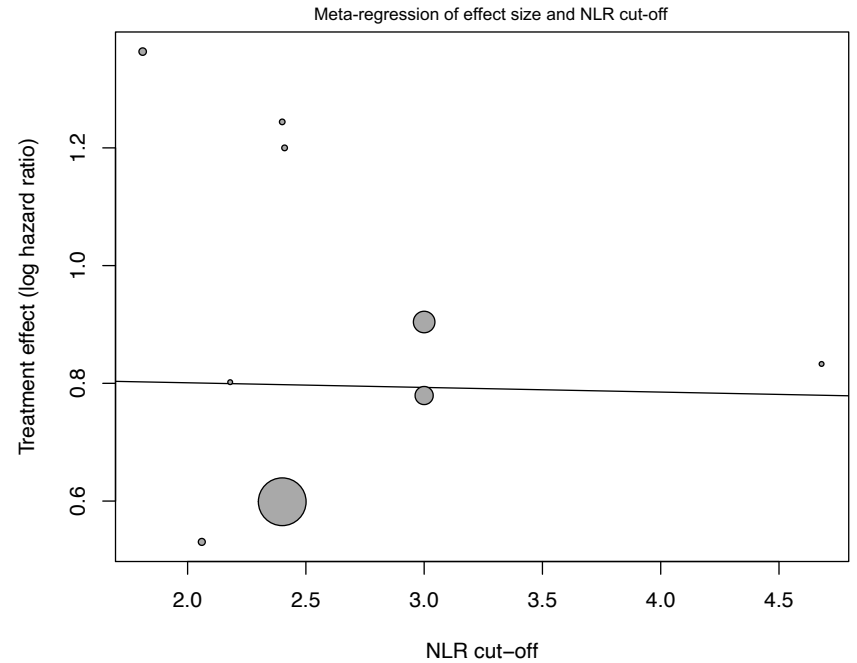

Supplementary Figure 139 - NLR: PFS in Endometrial carcinoma

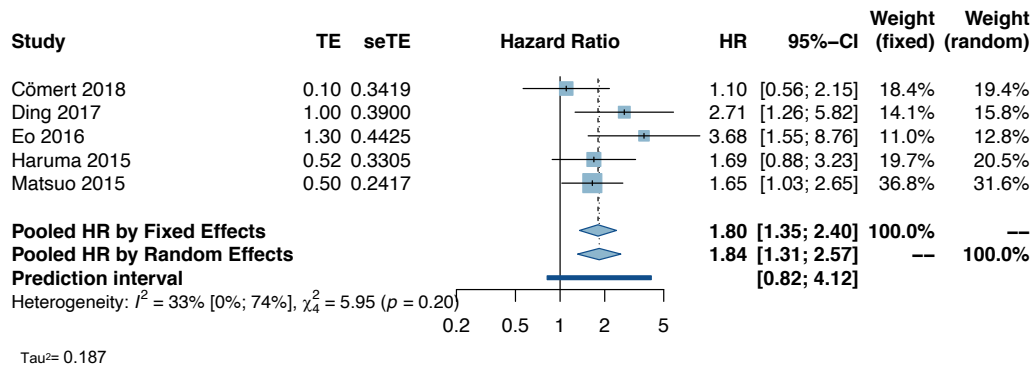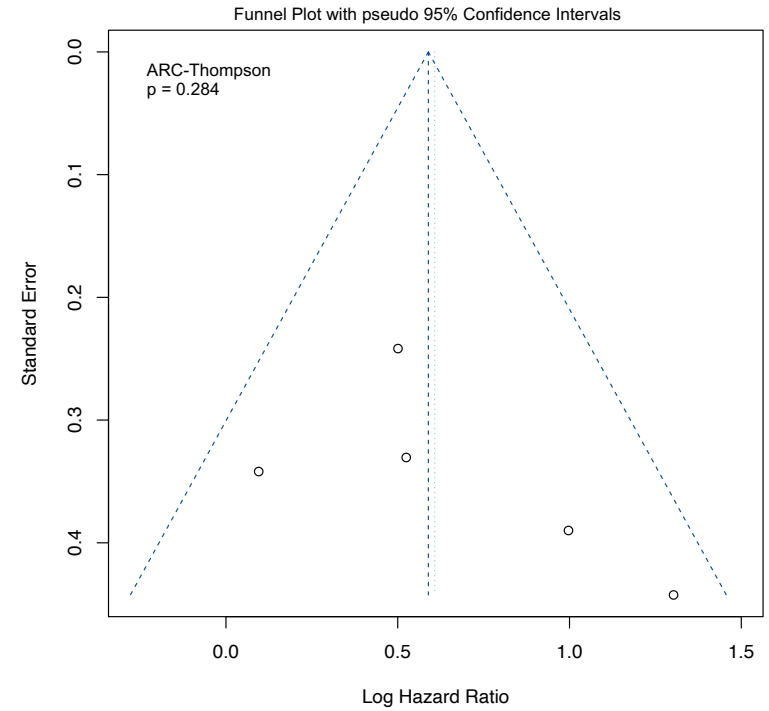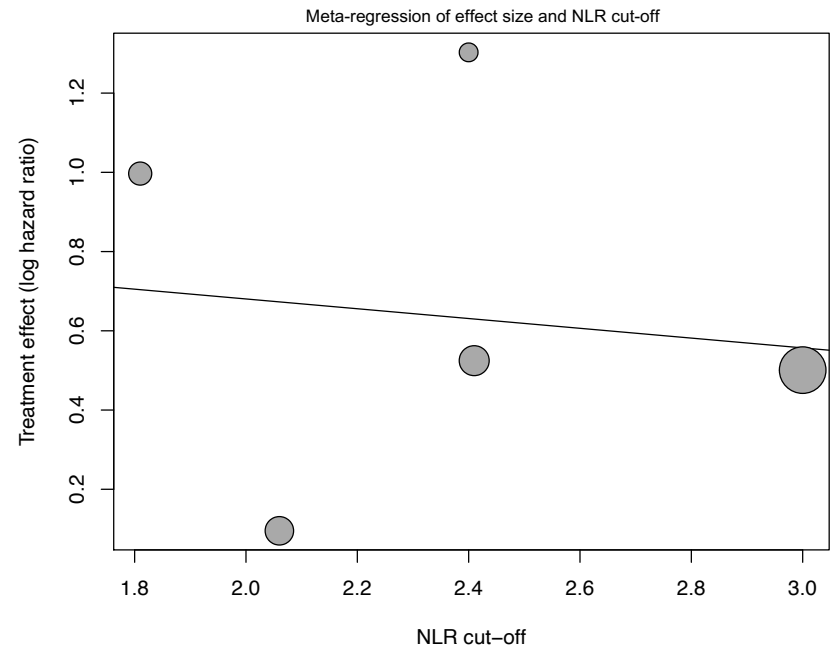

**Supplementary Figure 140 - NLR: DFS in Breast (Triple Negative and Her2 Positive)**

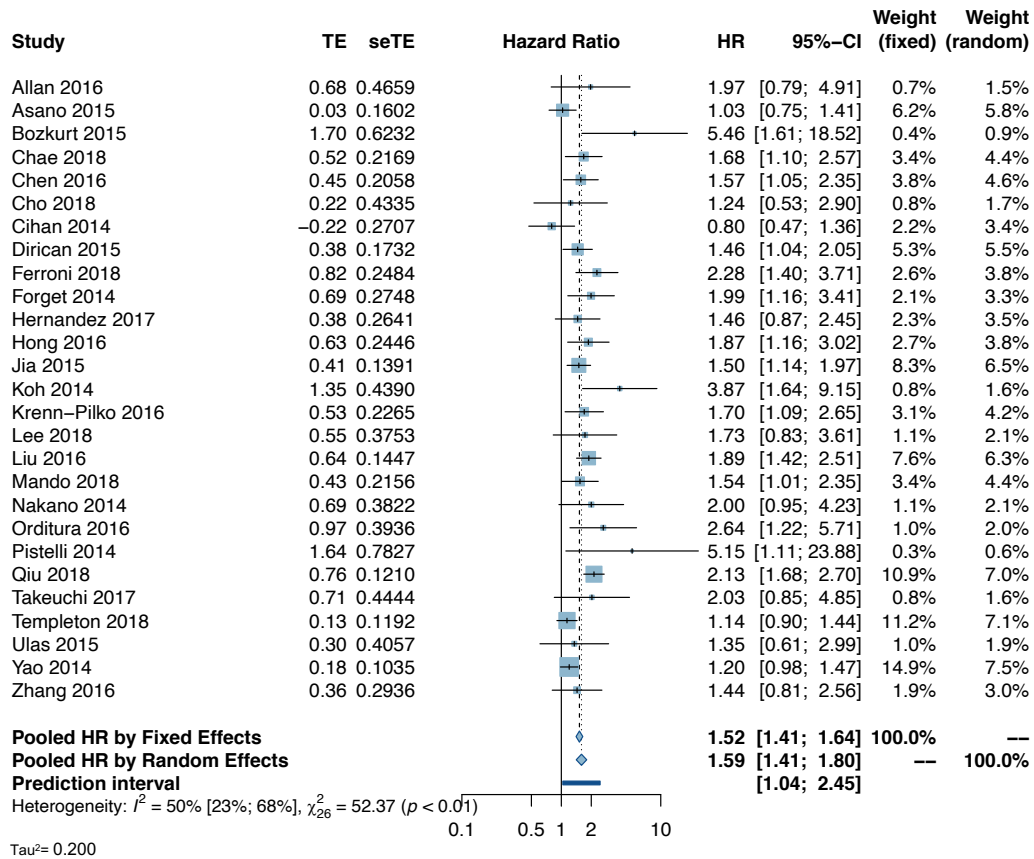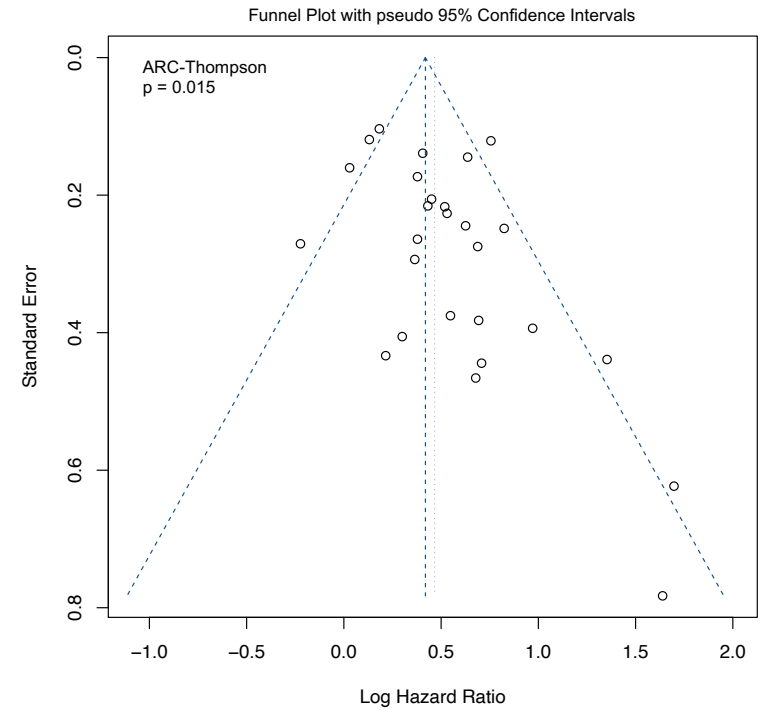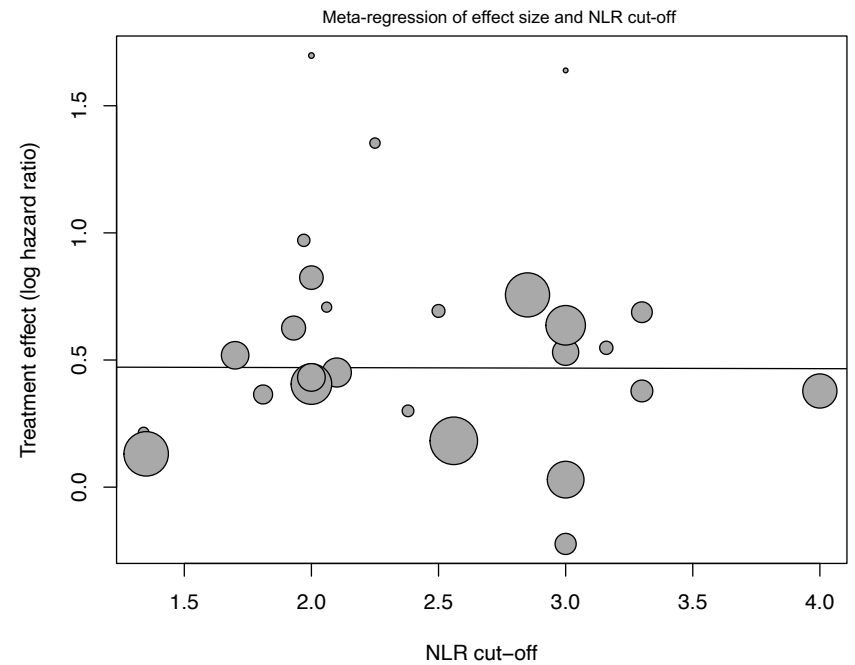

Supplementary Figure 141 - NLR: OS in Breast (Triple Negative and Her2 Positive)

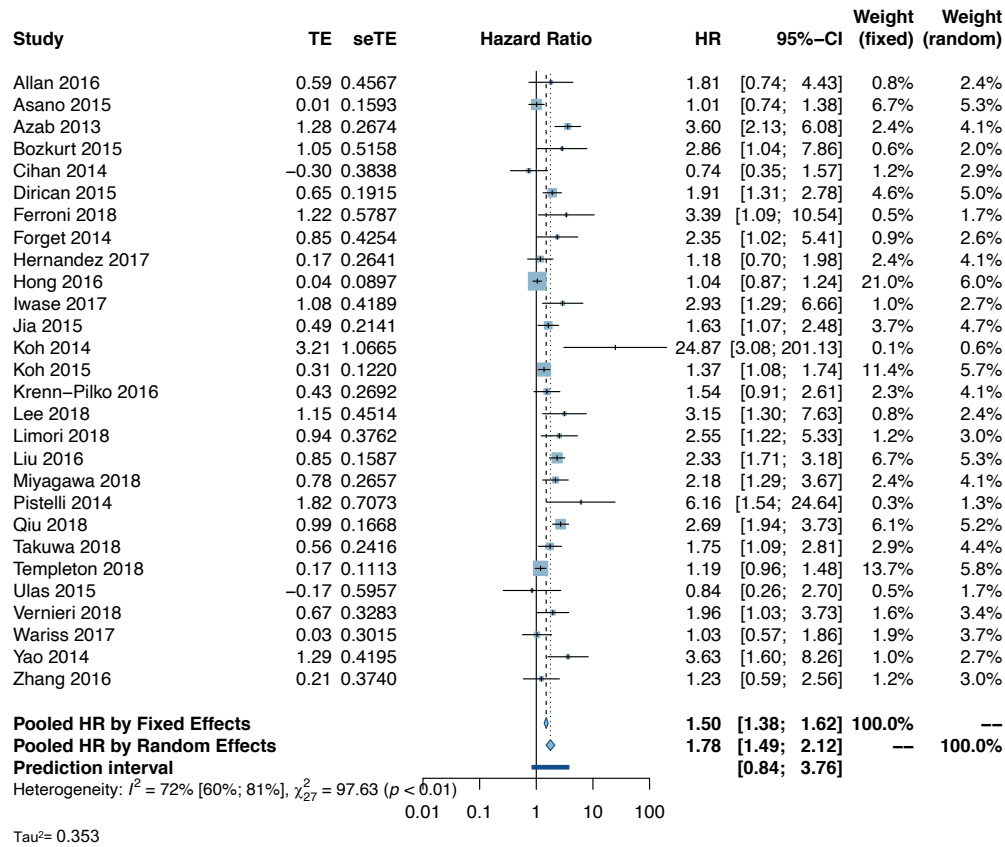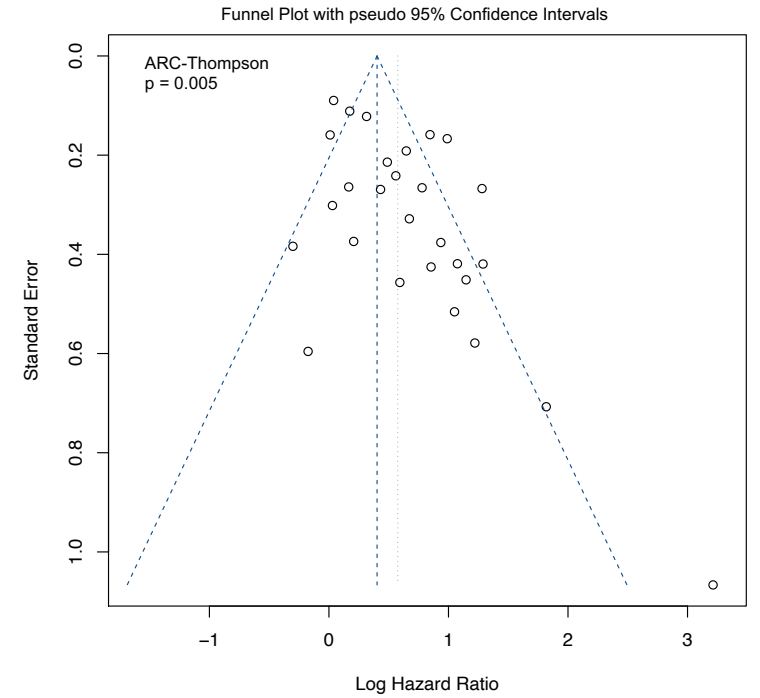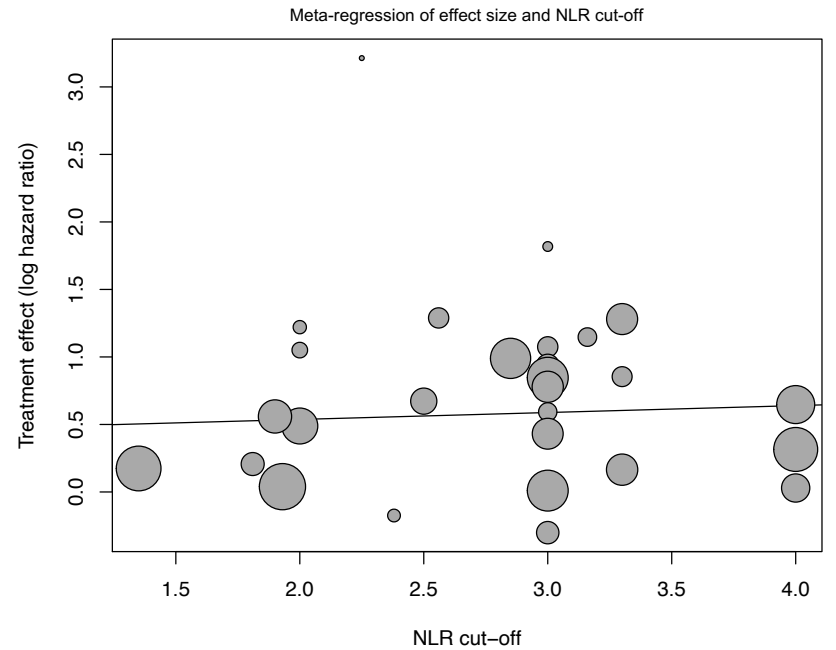

Supplementary Figure 142 - NLR: DFS in Breast (SR)

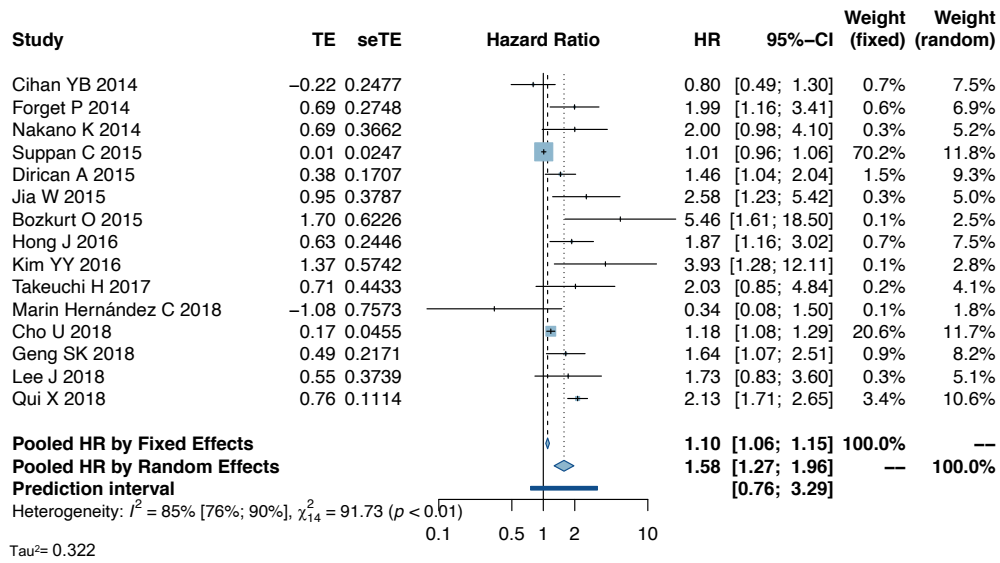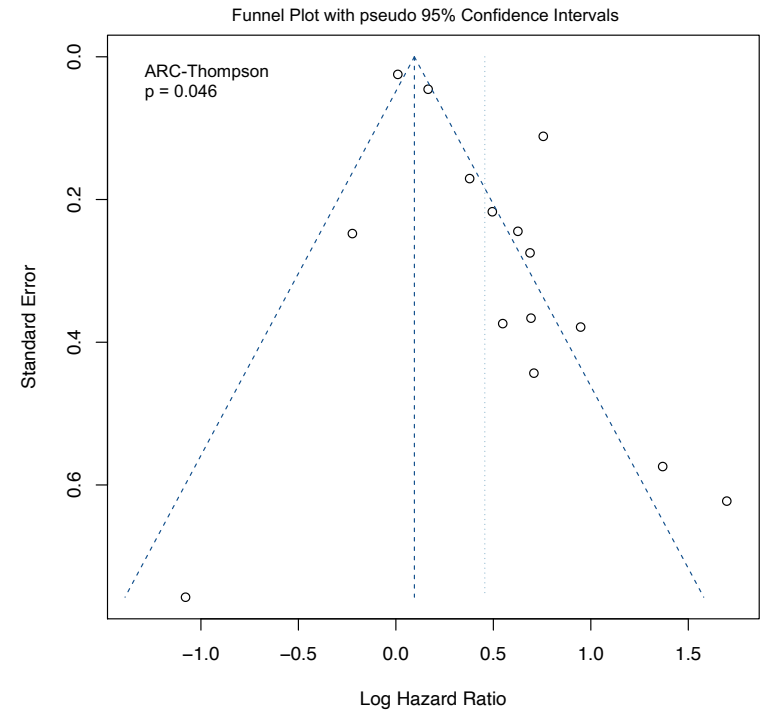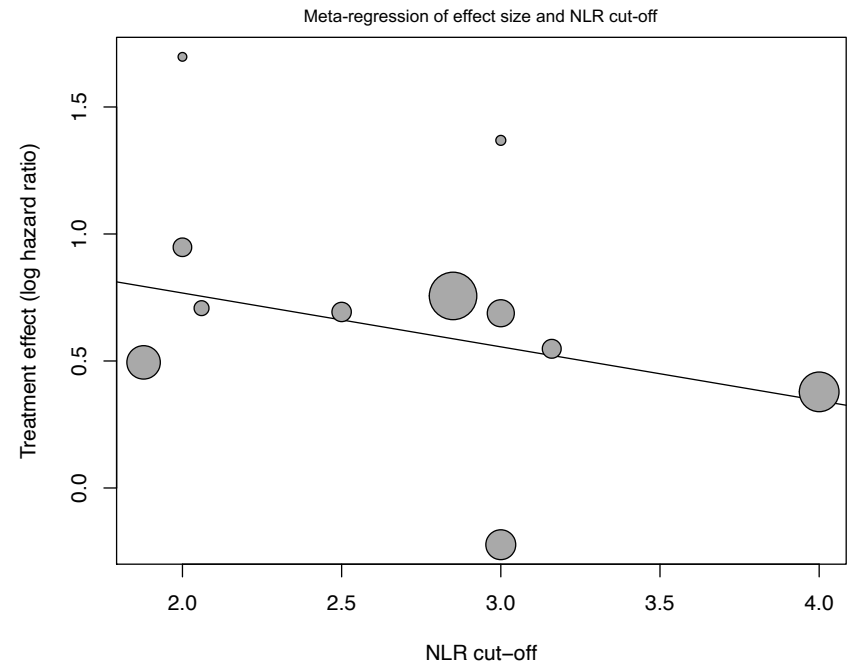

### Supplementary Figure 143 - NLR: OS in Breast (SR)

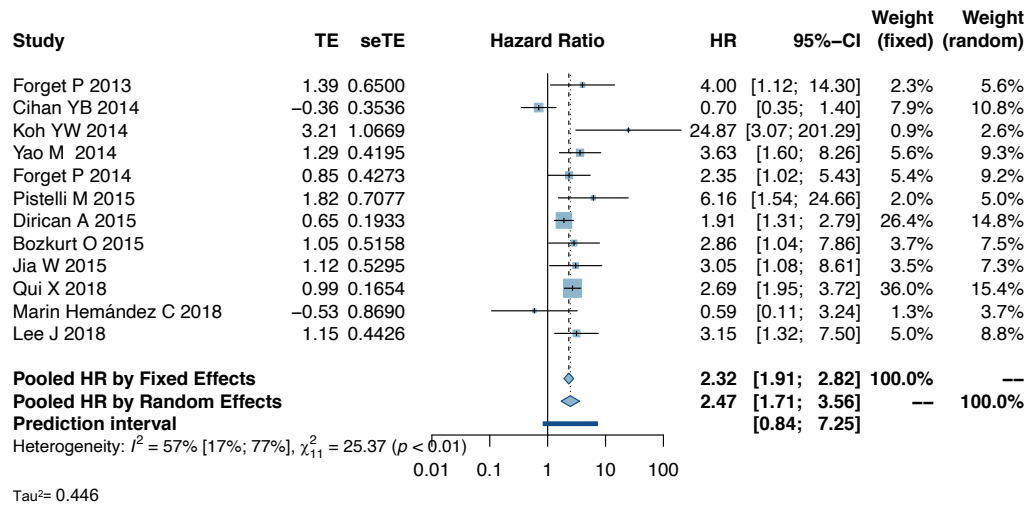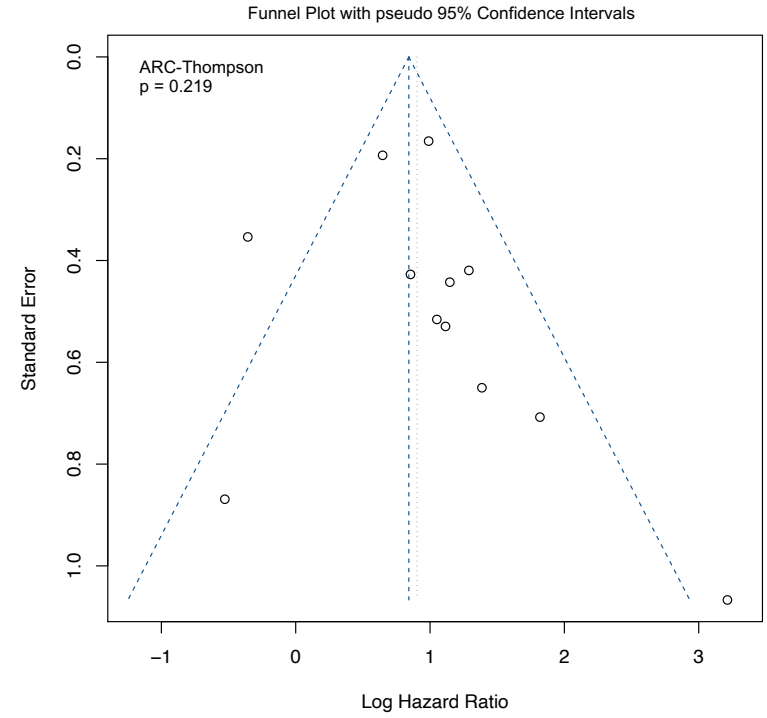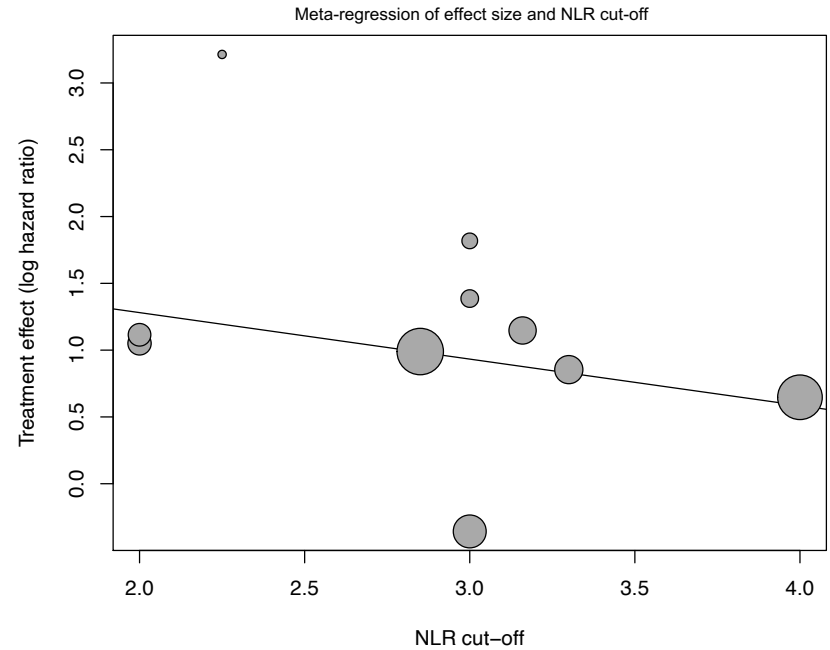



**Supplementary Figure 144 - NLR: RFS in Breast (SR)**

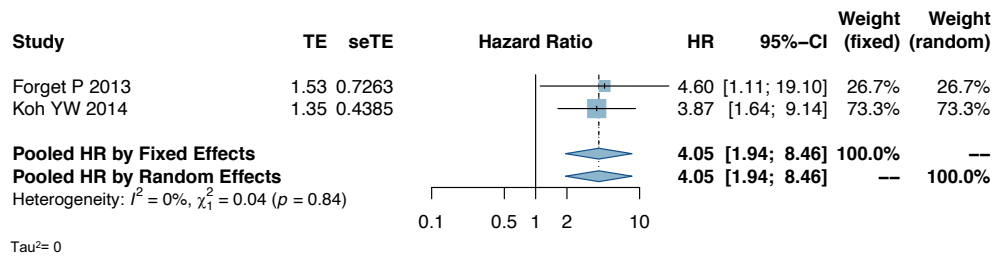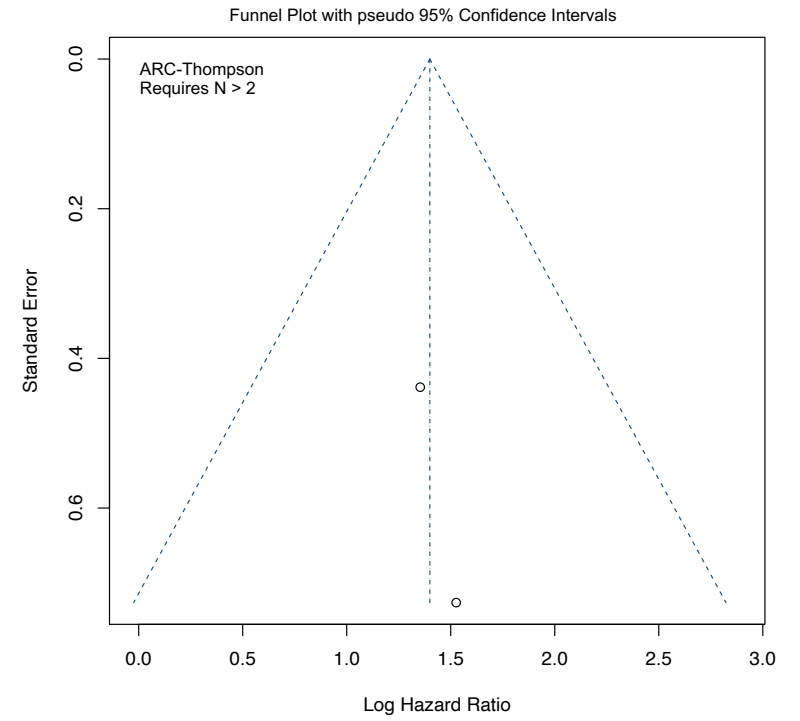

**Supplementary Figure 145 - NLR: OS in Hepatocellular (Sorfenib)**

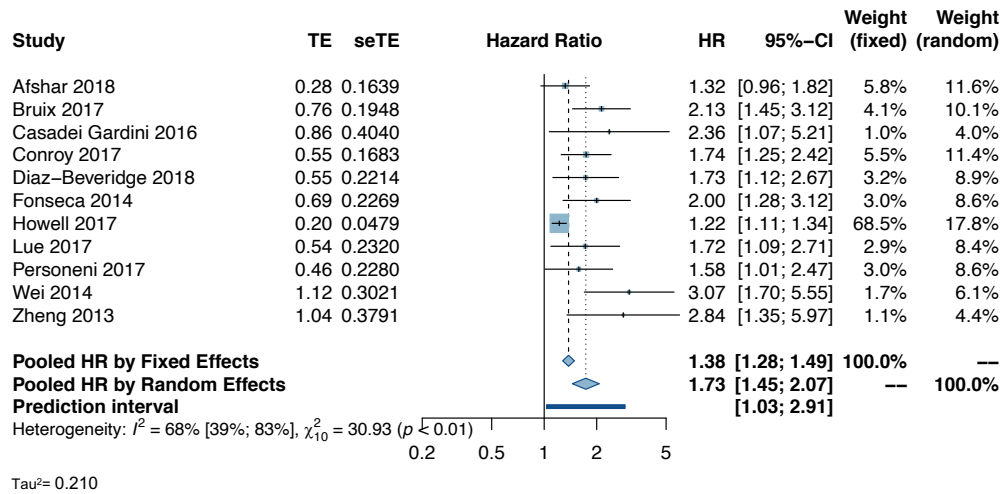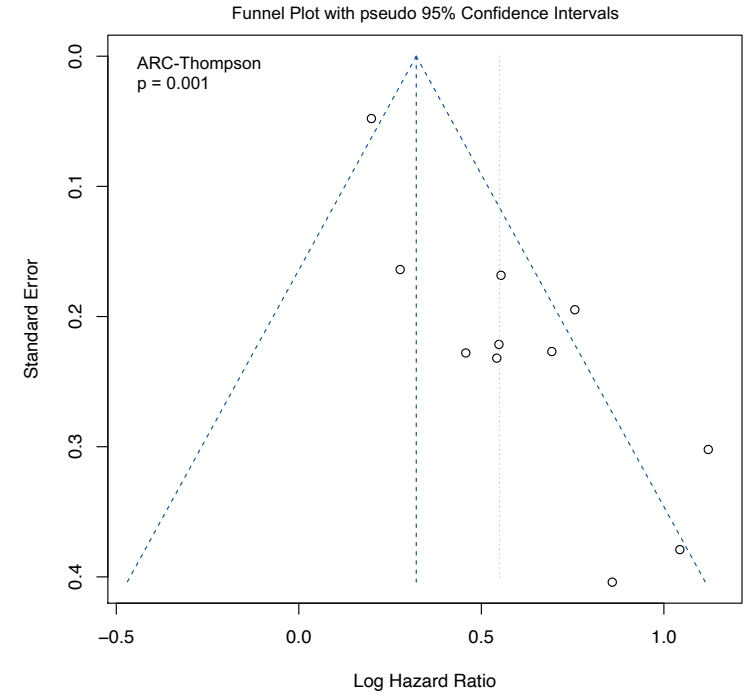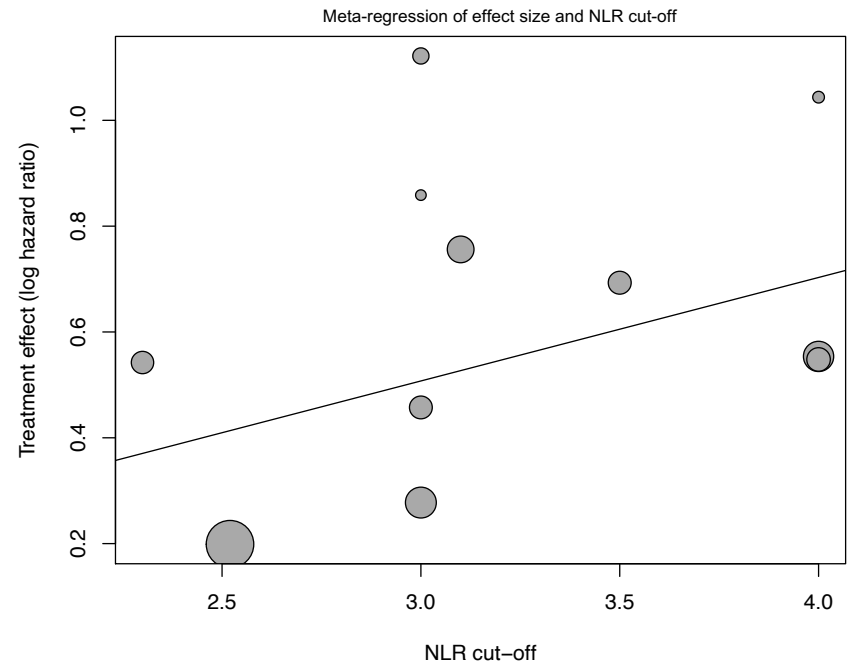

### Supplementary Figure 146 - NLR: OS in Hepatocellular (TACE)

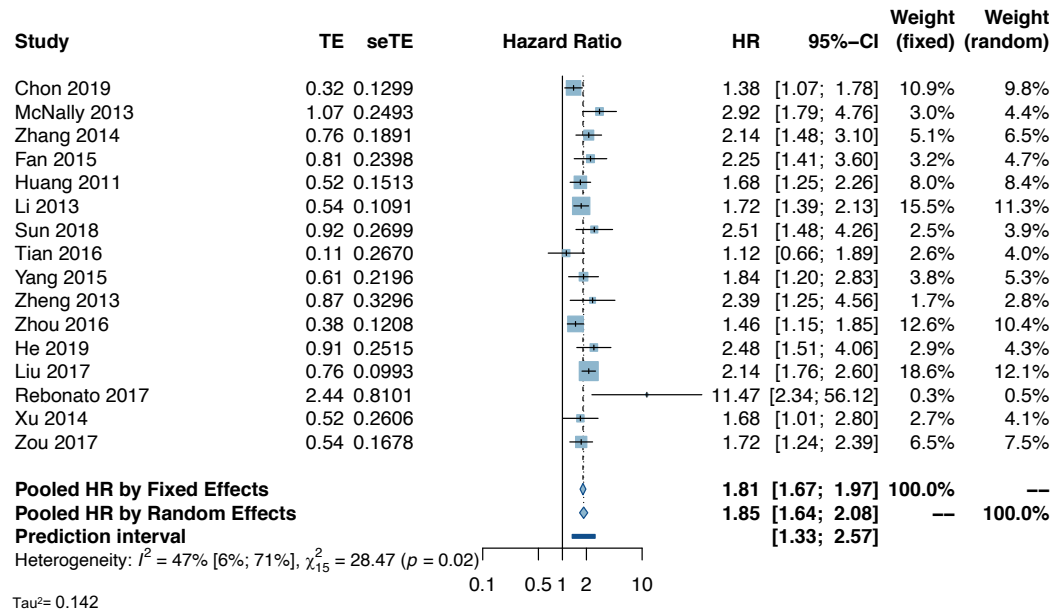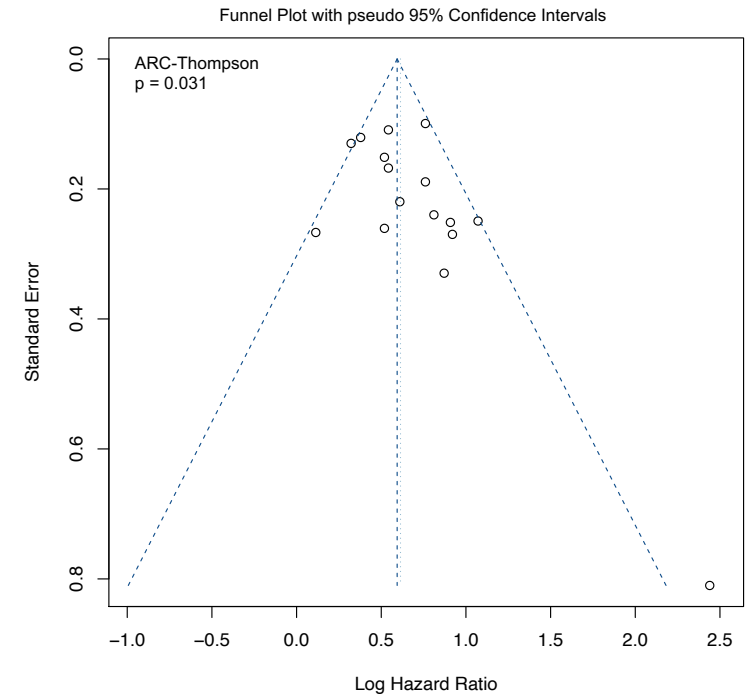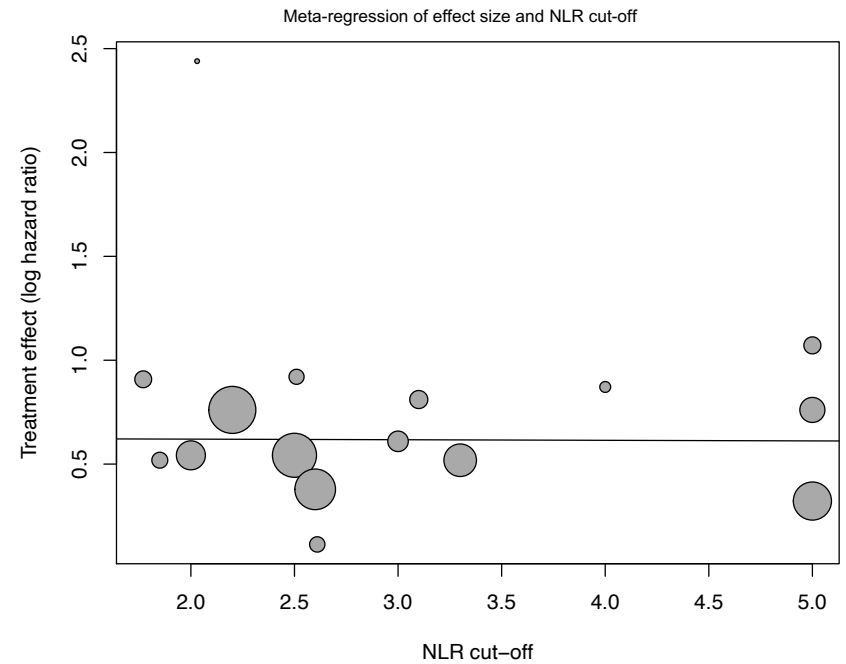

### Supplementary Figure 147 - NLR: OS in Glioma

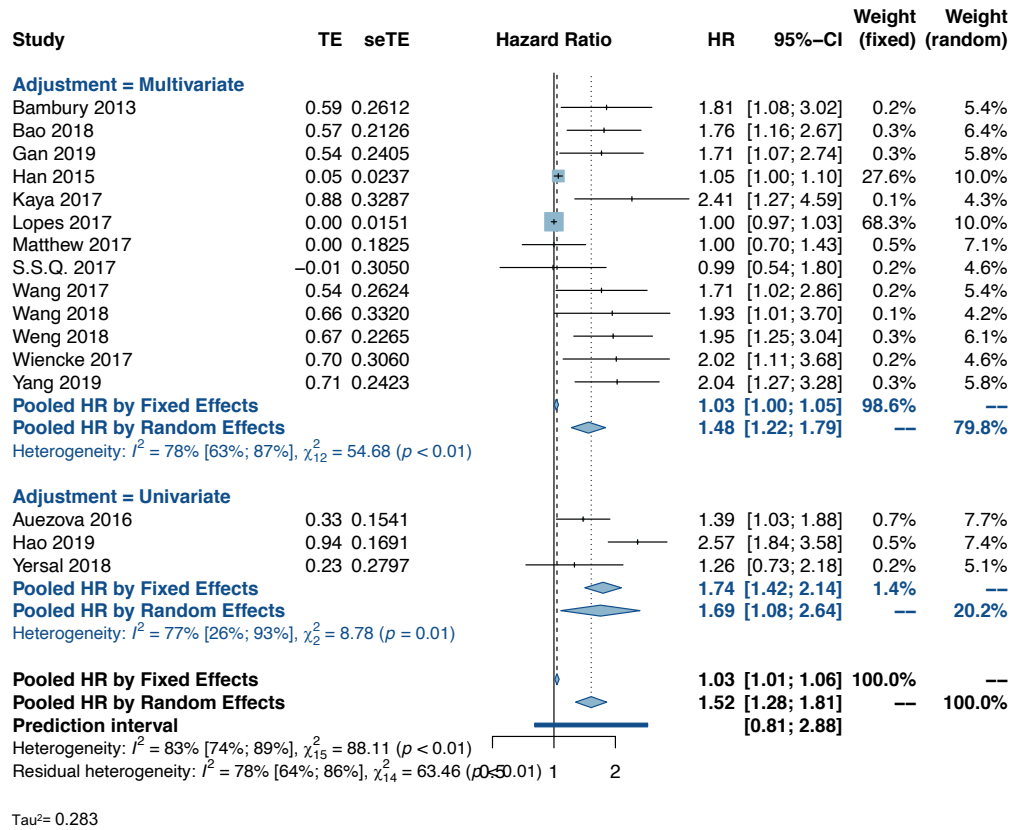

Tau<sup>2</sup> = 0.283

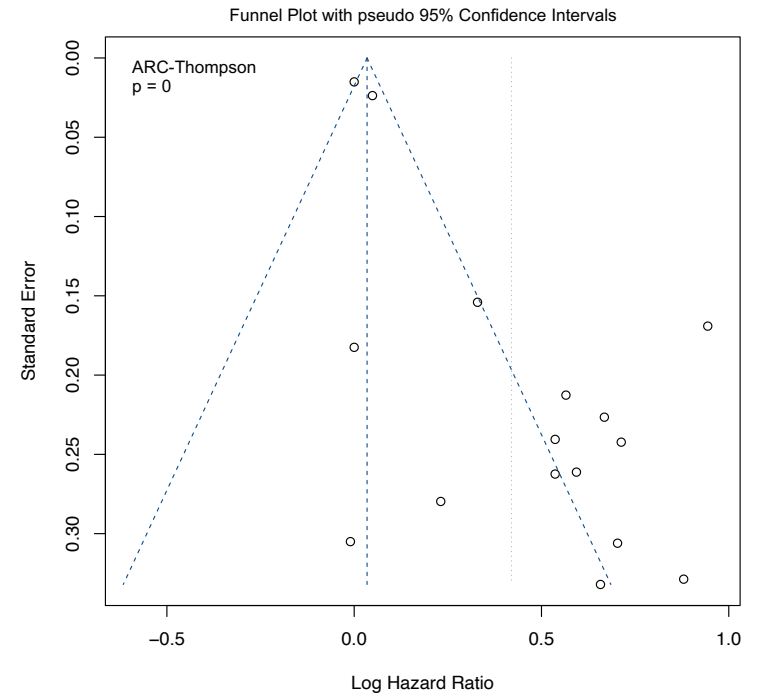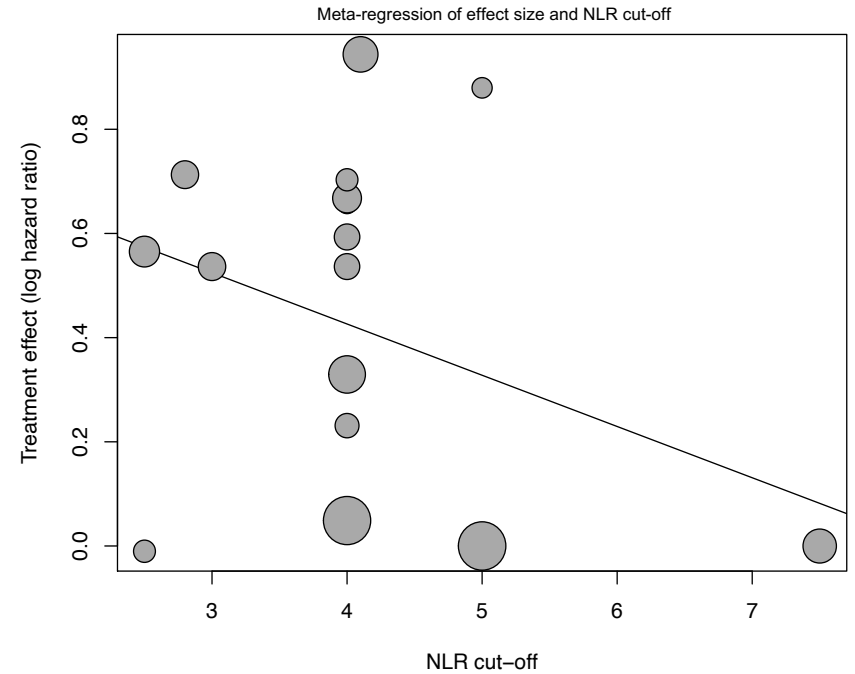

### Supplementary Figure 148 - NLR: OS in NSCLC

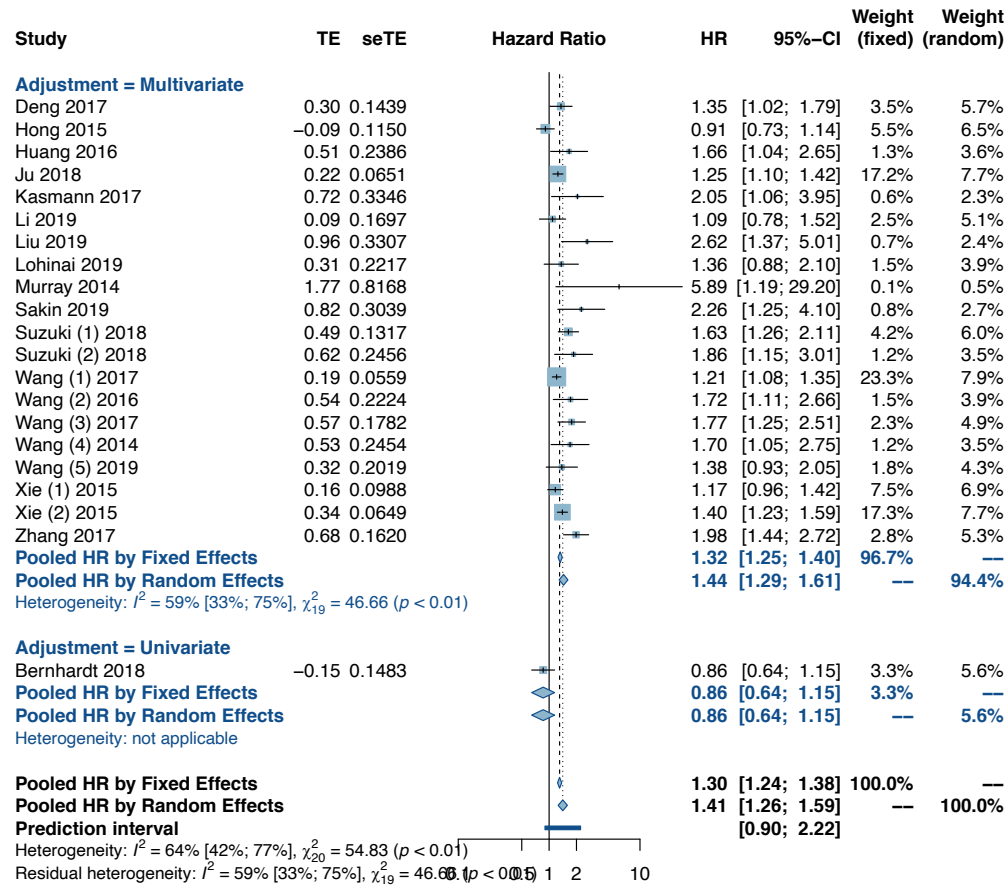

Tau<sup>2</sup> = 0.207

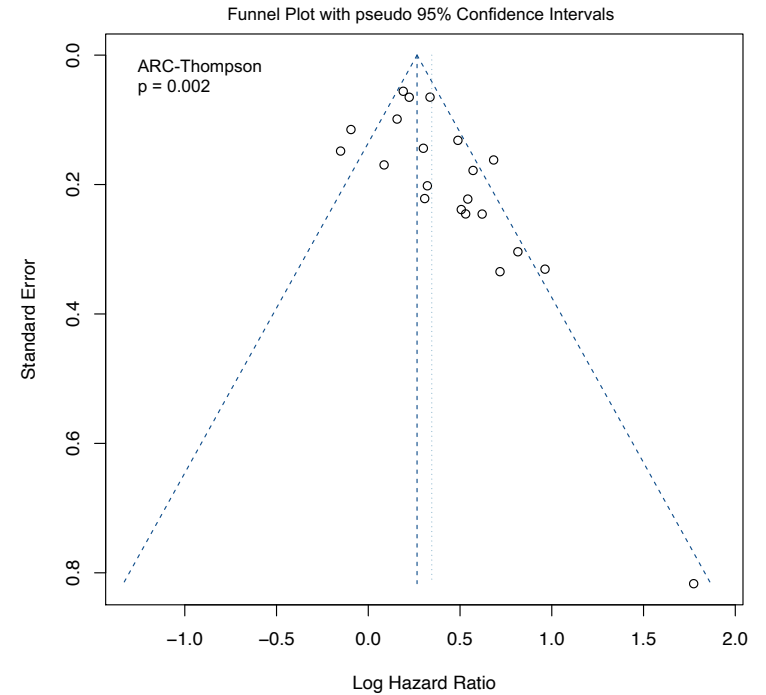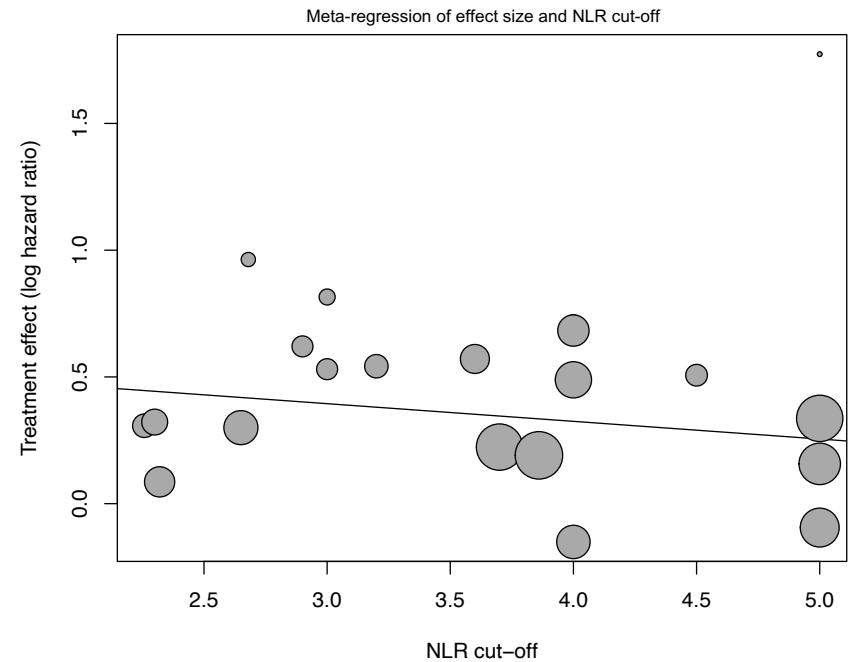

Supplementary Figure 149 - NLR: PFS in NSCLC (Immune Checkpoint Inhibitors)

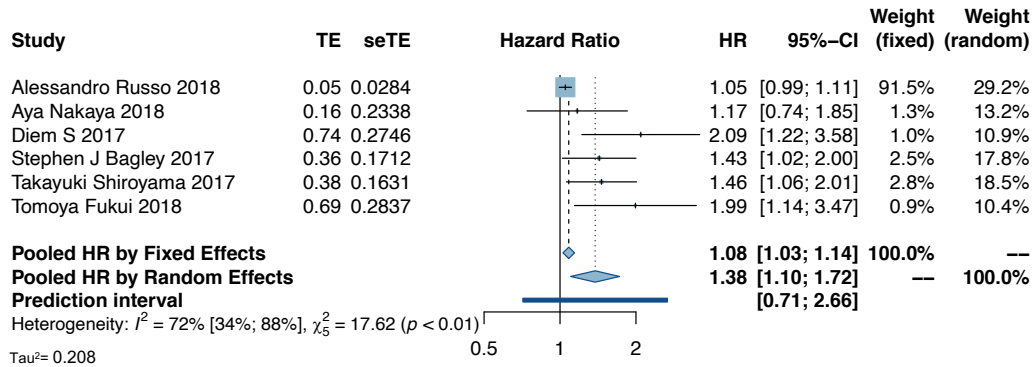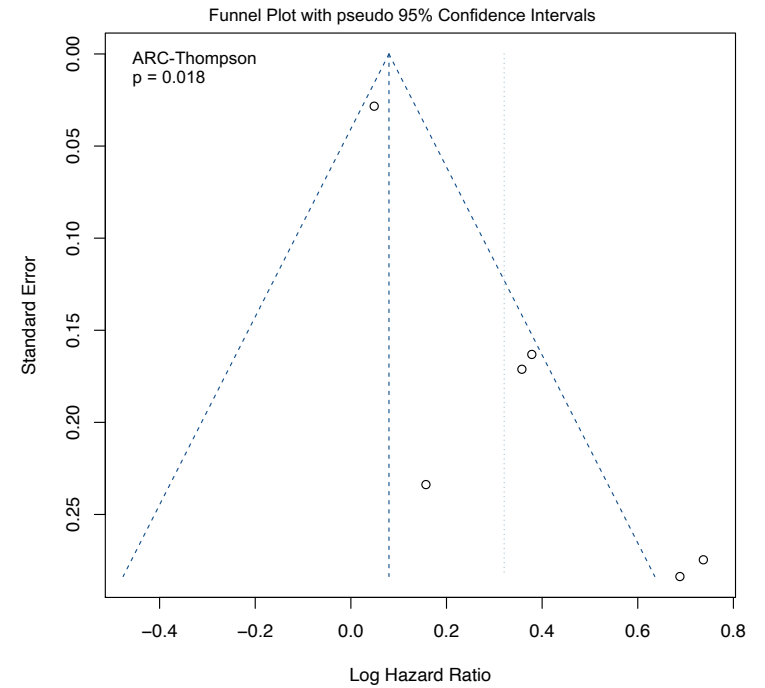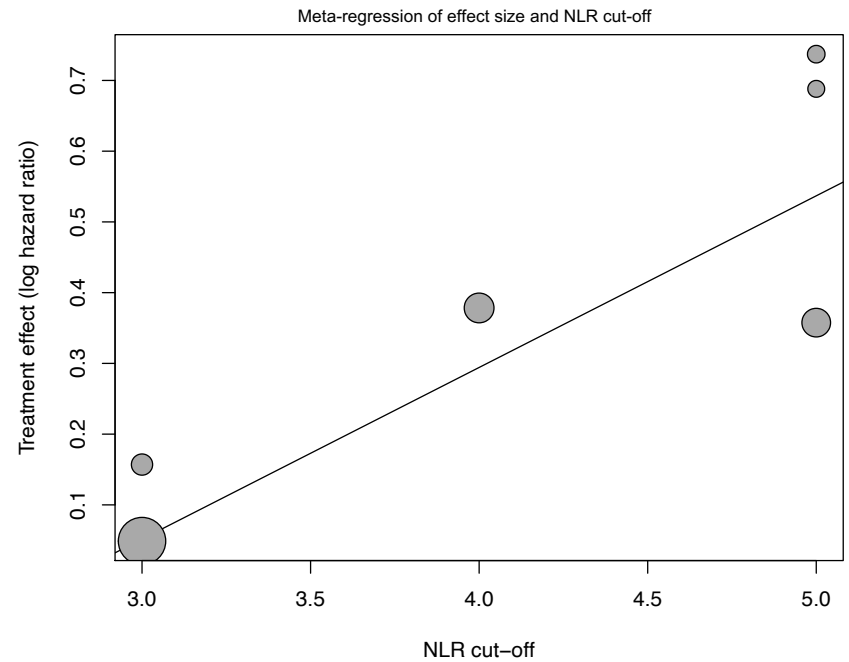

Supplementary Figure 150 - NLR: OS in NSCLC (Chemotherapy)

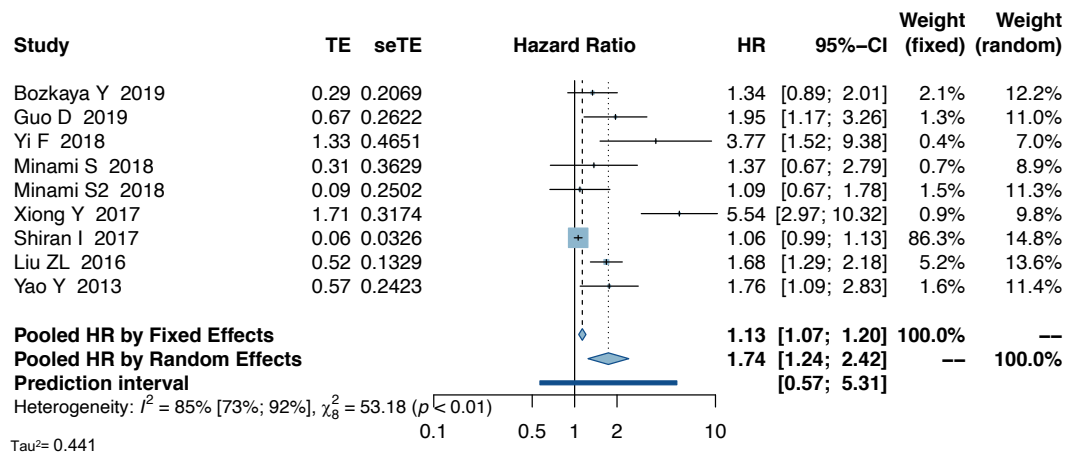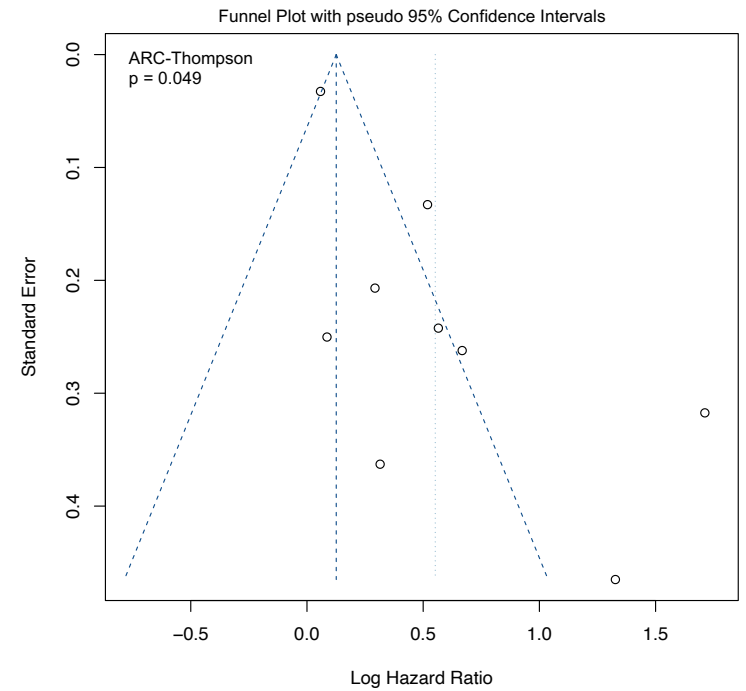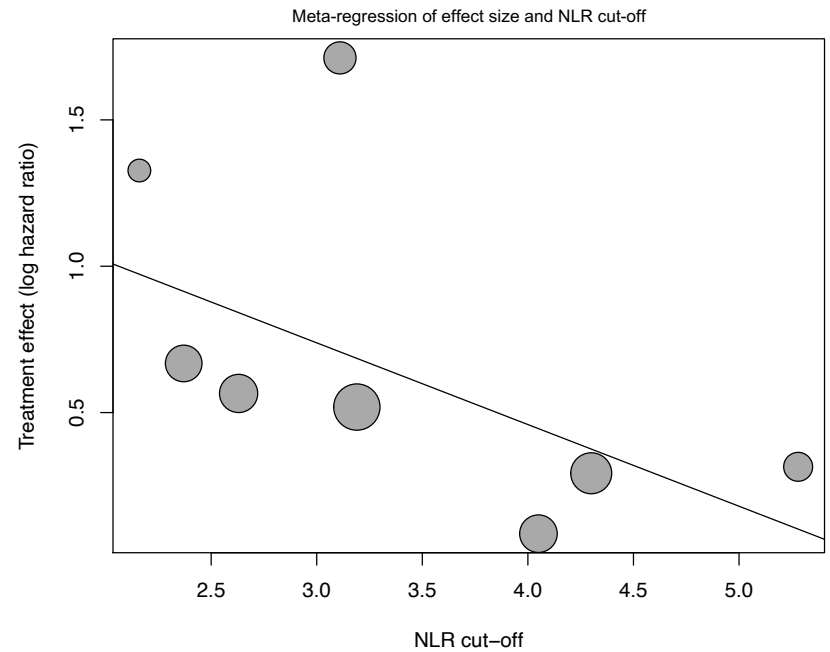

Supplementary Figure 151 - NLR: PFS in NSCLC (Chemotherapy)

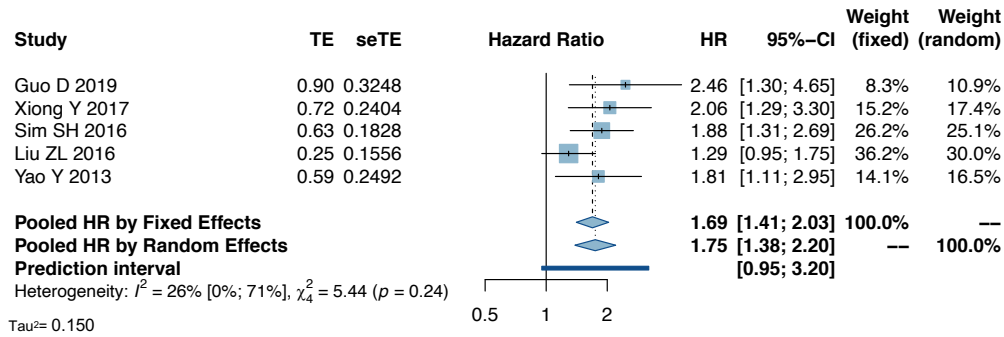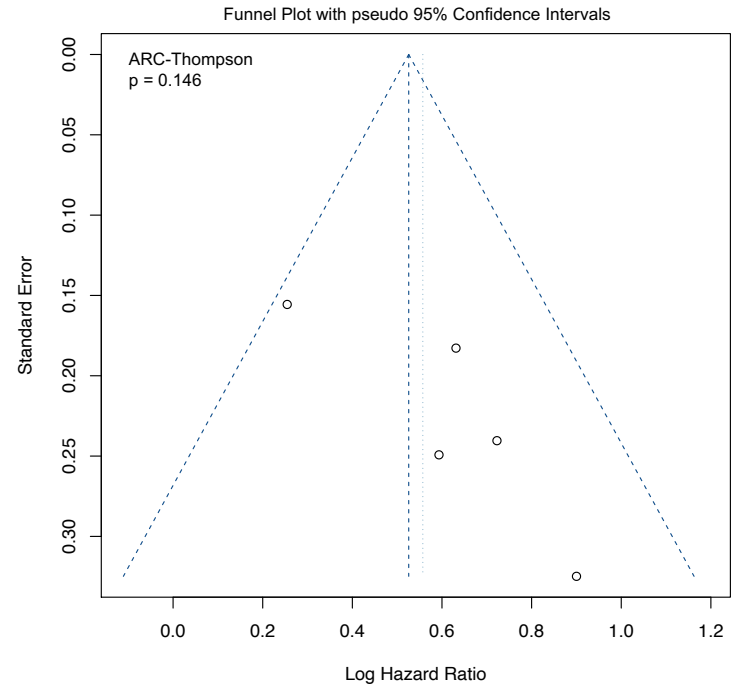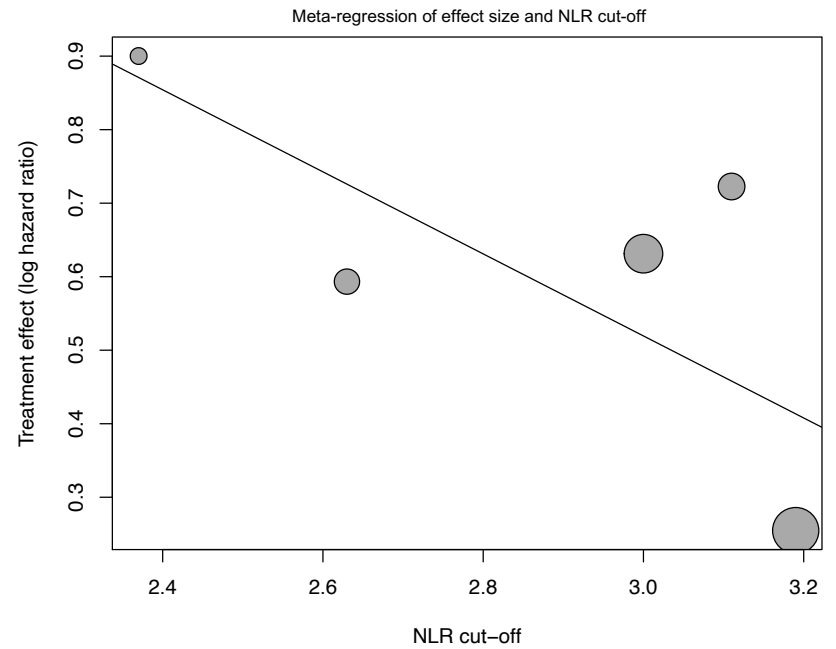



Supplementary Figure 152 - NLR: OS in NSCLC (TT)

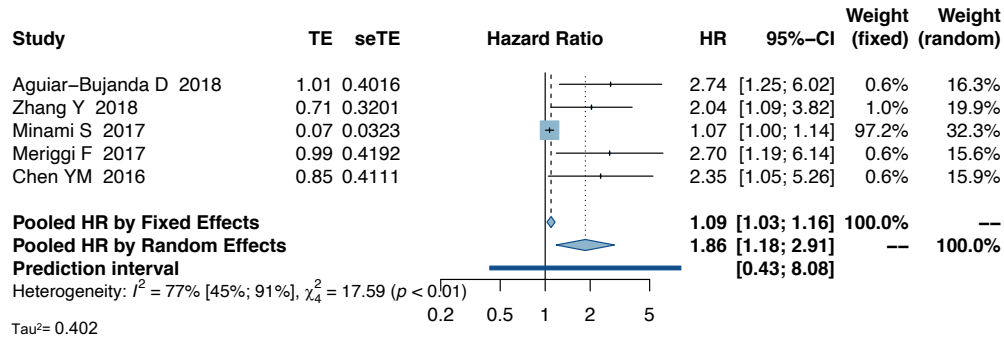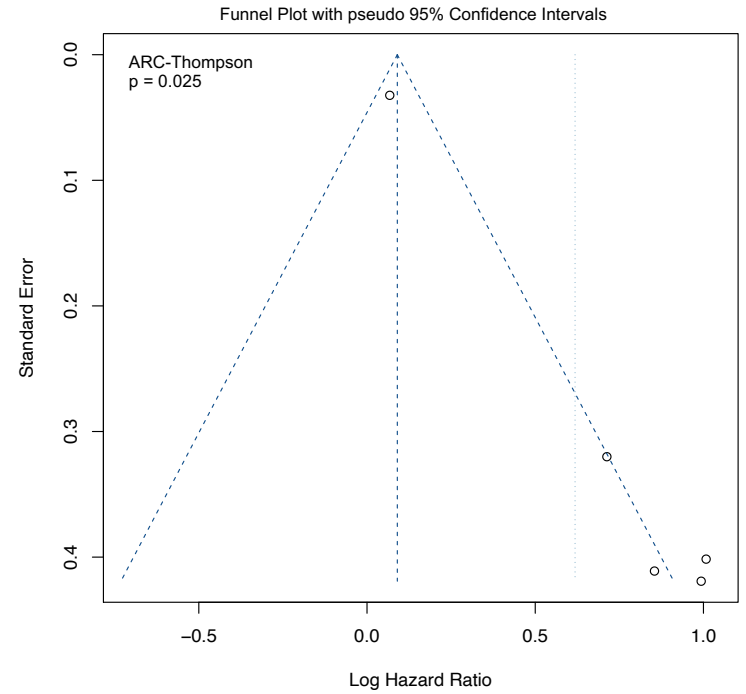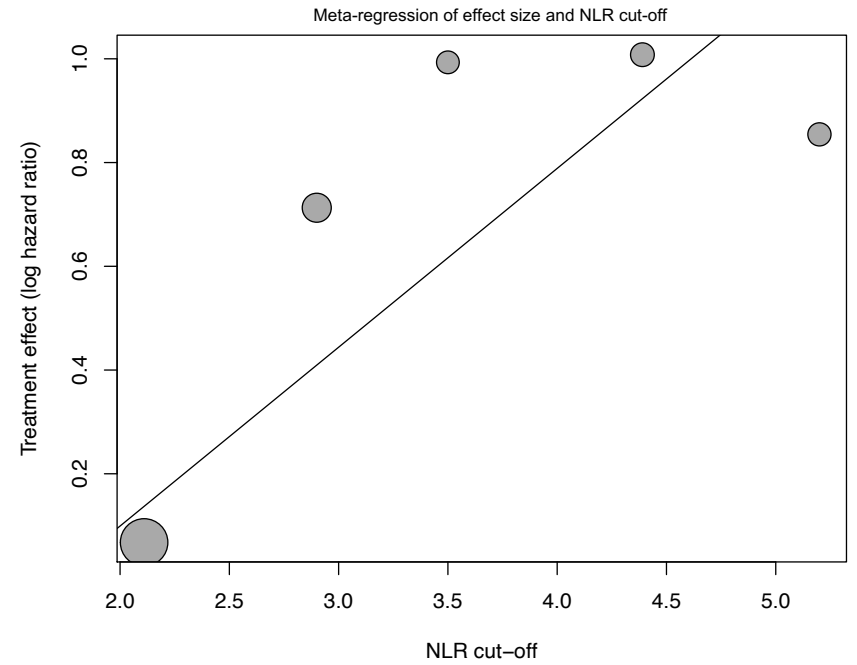

**Supplementary Figure 153 - NLR: PFS in NSCLC (TT)**

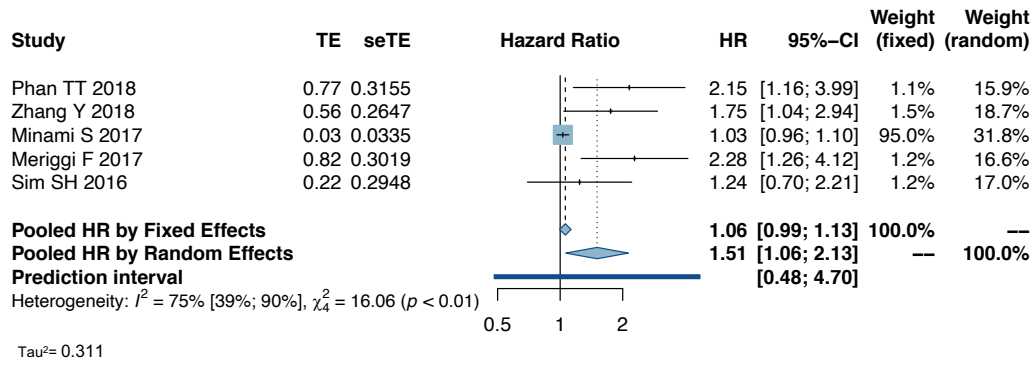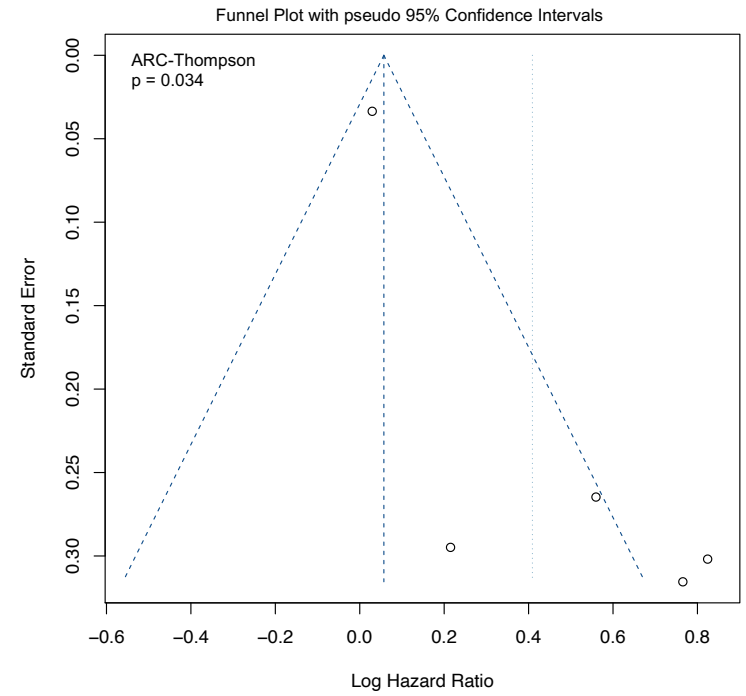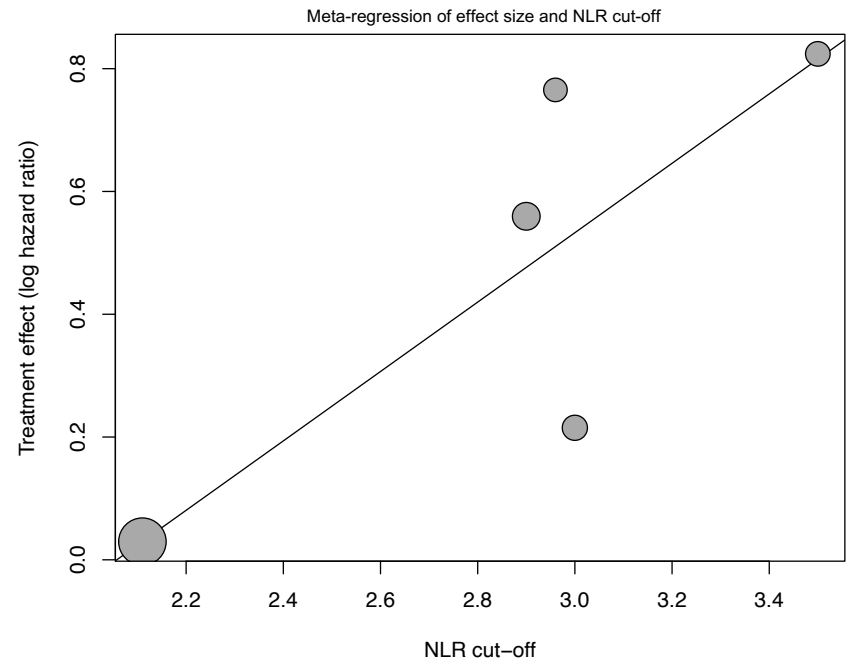

Supplementary Figure 154 - NLR: OS in NSCLC (Nivolumab)

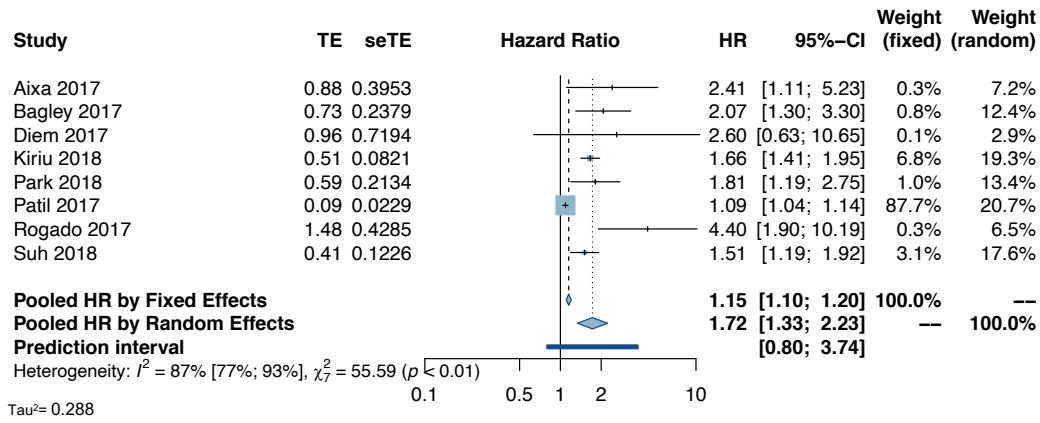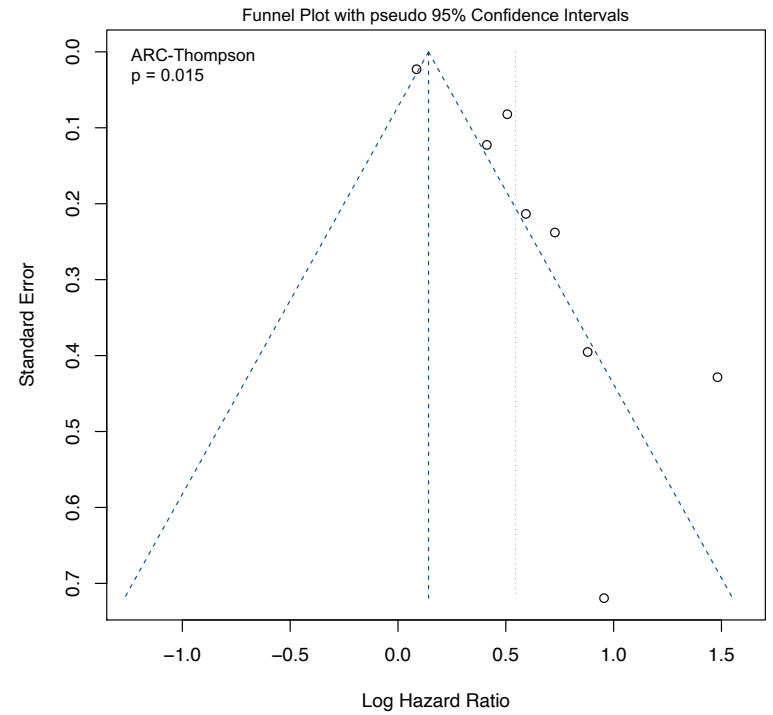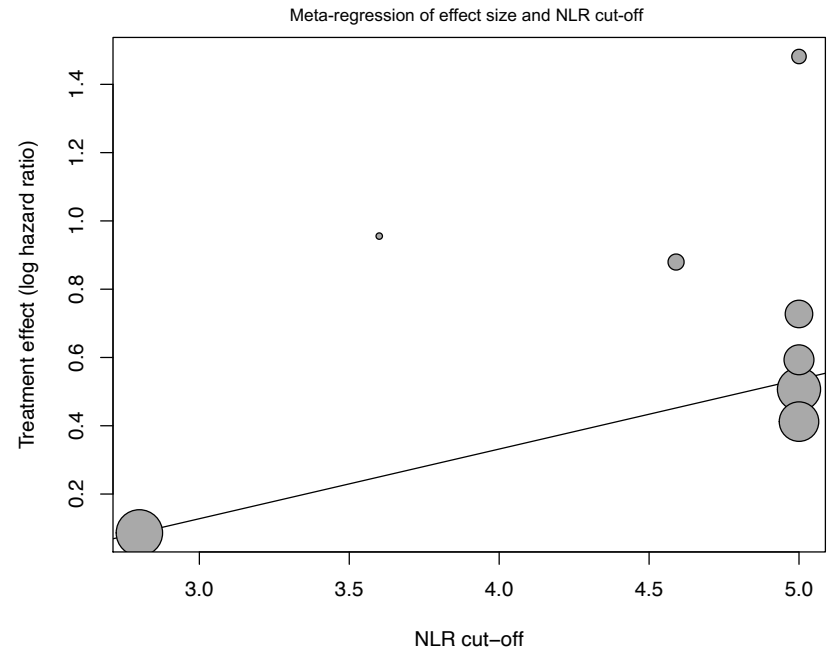

Supplementary Figure 155 - NLR: PFS in NSCLC (Nivoumab)

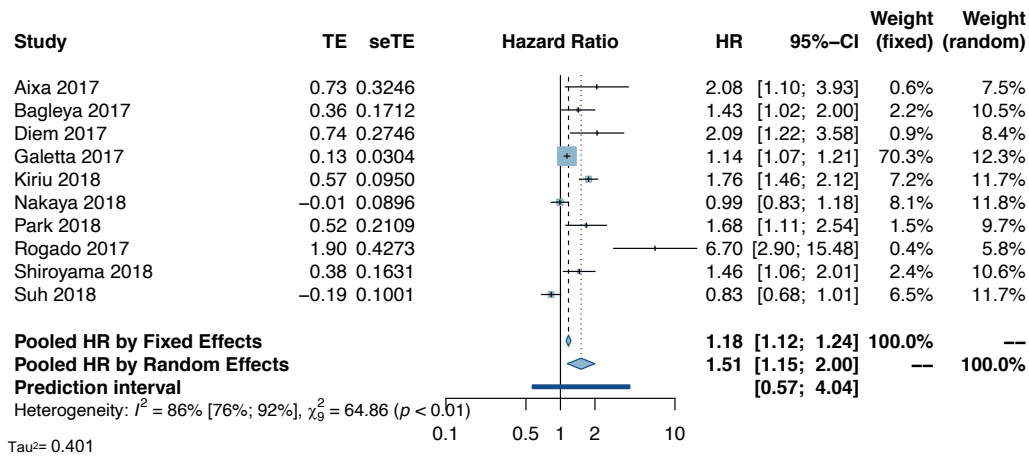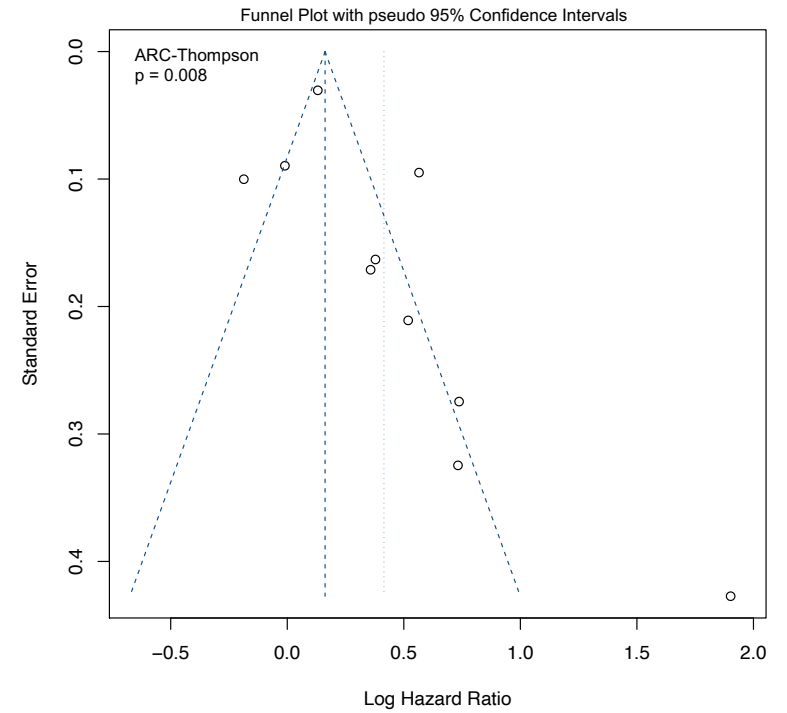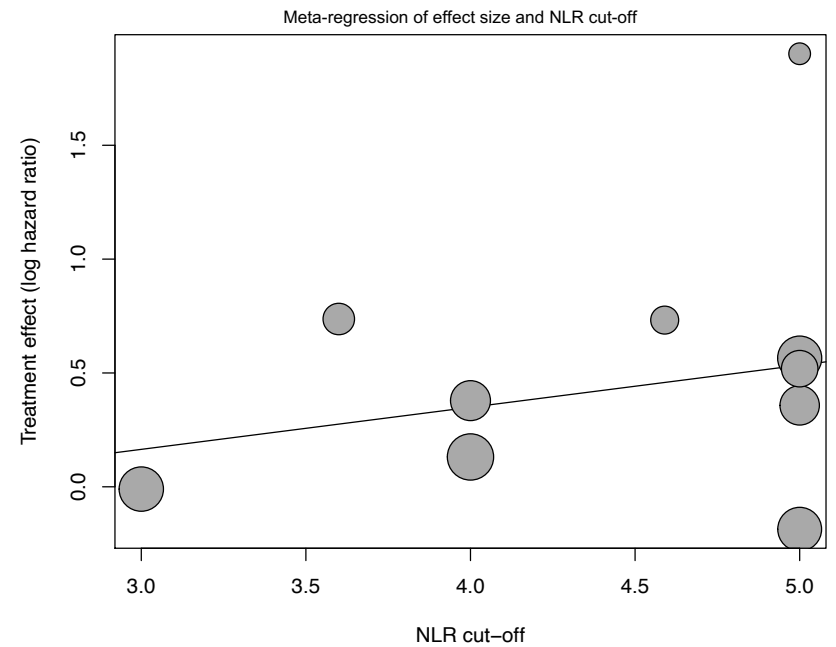

**Supplementary Figure 156 - NLR: OS in NSCLC (PD-1 inhibitor)**

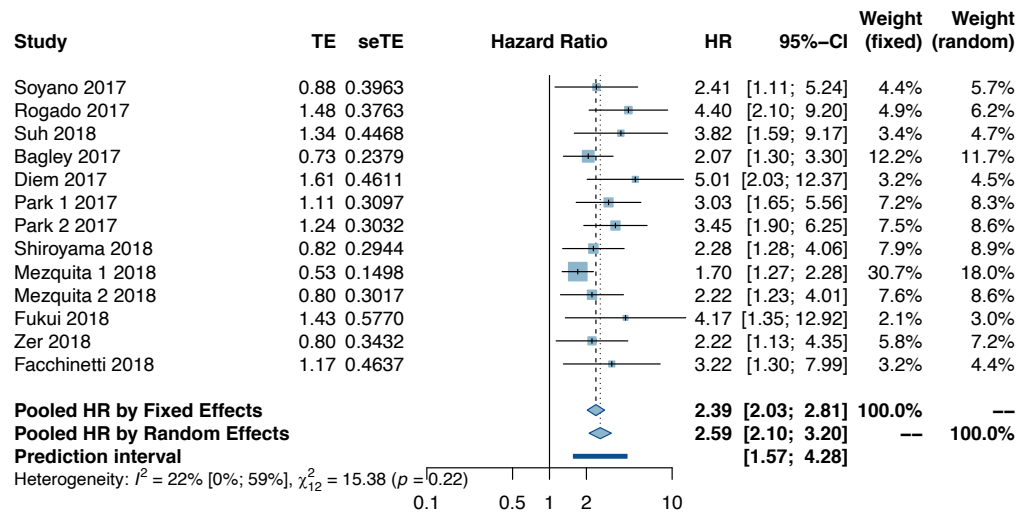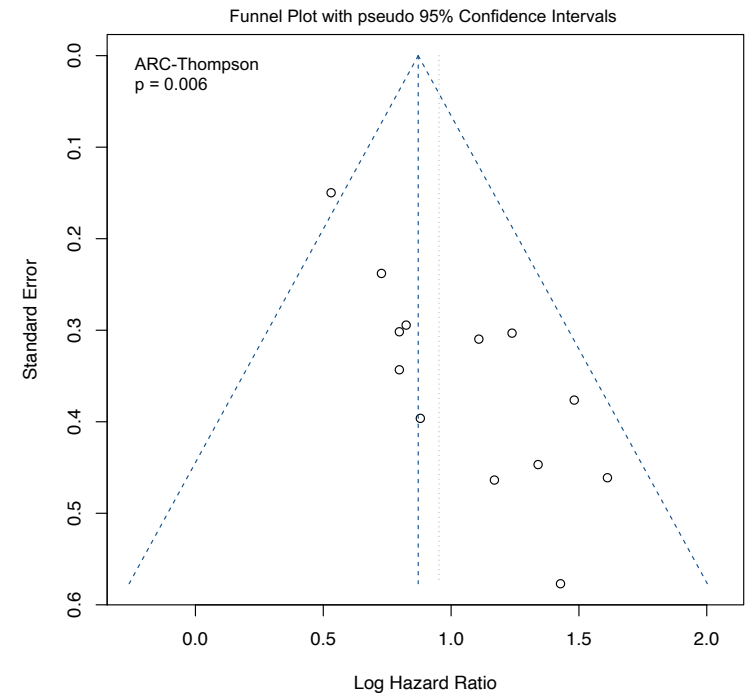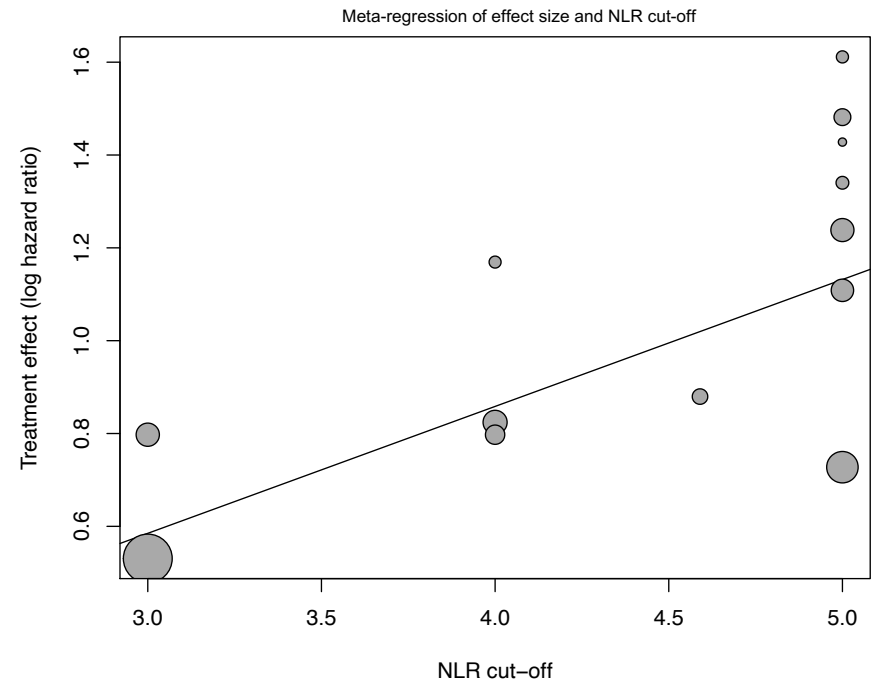

Supplementary Figure 157 - NLR: PFS in NSCLC (PD-1 inhibitor)

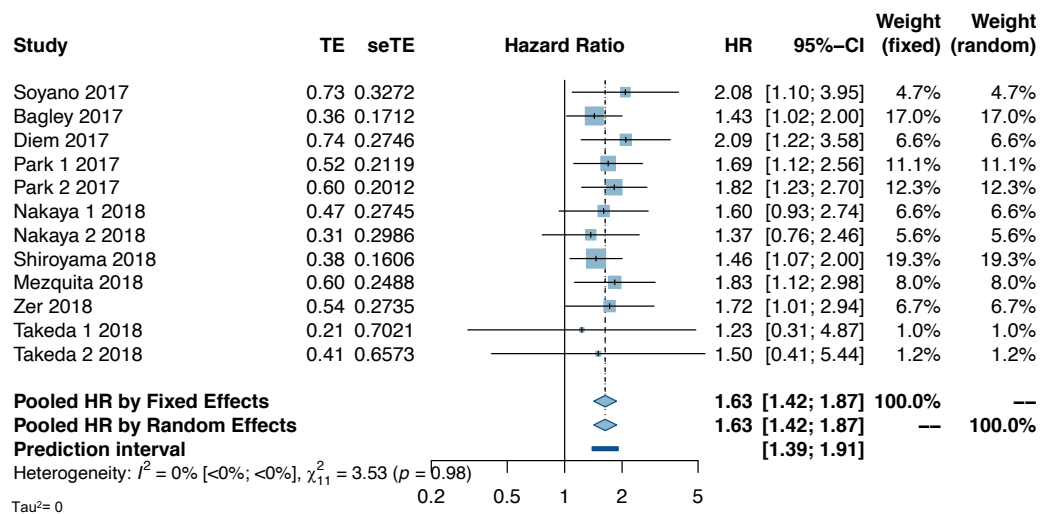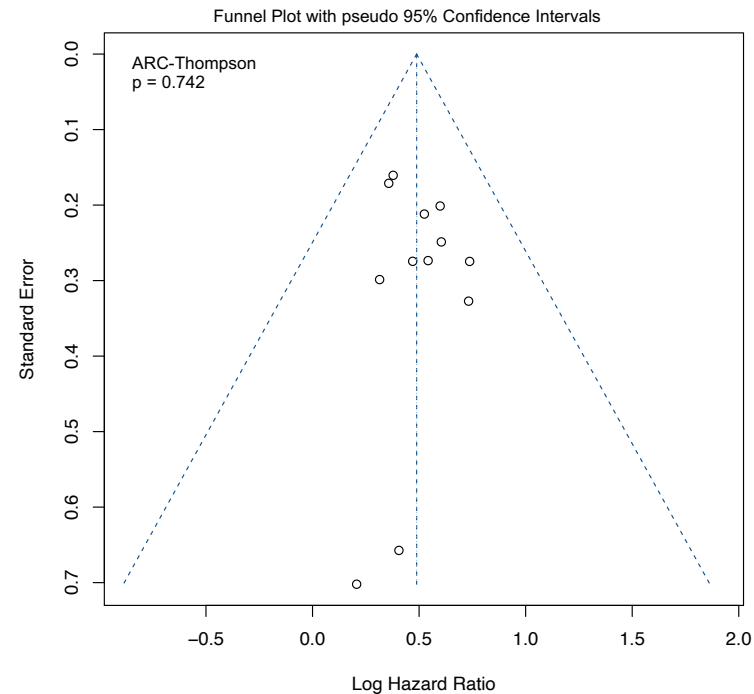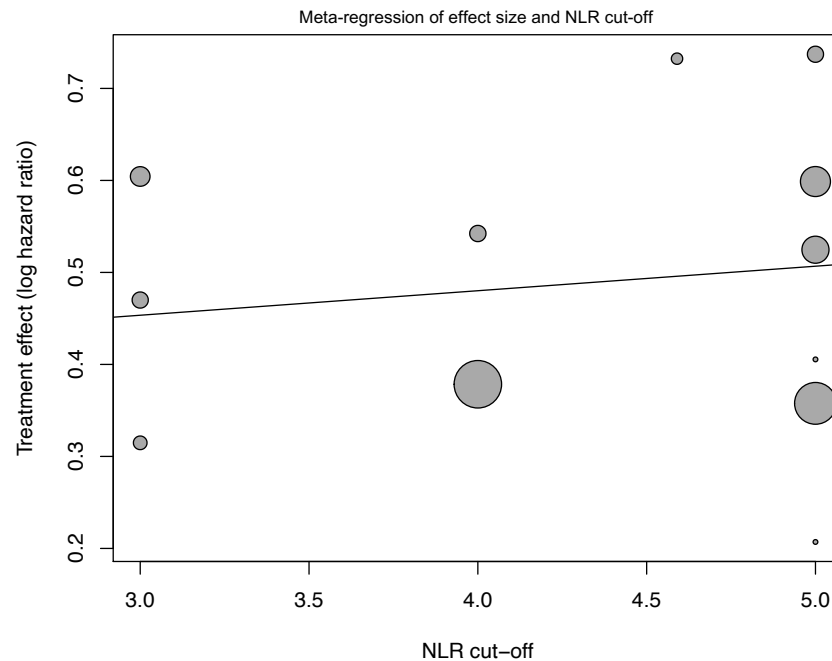

**Supplementary Figure 158 - NLR: OS in NSCLC (ST)**

| Study                 | TE   | seTE   | Hazard Ratio | HR   | 95%-CI        | Weight (fixed) | Weight (random) |
|-----------------------|------|--------|--------------|------|---------------|----------------|-----------------|
| Bozkaya Y 2019        | 0.29 | 0.2069 |              | 1.34 | [0.89; 2.01]  | 0.6%           | 4.9%            |
| Guo D 2019            | 0.67 | 0.2622 |              | 1.95 | [1.17; 3.26]  | 0.4%           | 4.4%            |
| Yi F 2018             | 1.33 | 0.4651 |              | 3.77 | [1.52; 9.38]  | 0.1%           | 2.7%            |
| Minami S 2018         | 0.31 | 0.3629 |              | 1.37 | [0.67; 2.79]  | 0.2%           | 3.5%            |
| Minami S2 2018        | 0.09 | 0.2502 |              | 1.09 | [0.67; 1.78]  | 0.4%           | 4.5%            |
| Xiong Y 2017          | 1.71 | 0.3174 |              | 5.54 | [2.97; 10.32] | 0.2%           | 3.9%            |
| Shiran I 2017         | 0.06 | 0.0326 |              | 1.06 | [0.99; 1.13]  | 23.1%          | 6.1%            |
| Liu ZL 2016           | 0.52 | 0.1329 |              | 1.68 | [1.29; 2.18]  | 1.4%           | 5.6%            |
| Yao Y 2013            | 0.57 | 0.2423 |              | 1.76 | [1.09; 2.83]  | 0.4%           | 4.6%            |
| Kiriu T 2019          | 1.44 | 0.4646 |              | 4.20 | [1.69; 10.44] | 0.1%           | 2.7%            |
| Soyano AE 2018        | 0.63 | 0.2446 |              | 1.87 | [1.16; 3.02]  | 0.4%           | 4.6%            |
| Naqash AR 2018        | 1.05 | 0.3146 |              | 2.85 | [1.54; 5.28]  | 0.2%           | 3.9%            |
| Fukui T 2019          | 1.43 | 0.5770 |              | 4.17 | [1.35; 12.92] | 0.1%           | 2.1%            |
| Facchinetti F 2018    | 1.17 | 0.4637 |              | 3.22 | [1.30; 7.99]  | 0.1%           | 2.7%            |
| Diem S 2017           | 1.61 | 0.4611 |              | 5.01 | [2.03; 12.37] | 0.1%           | 2.7%            |
| Bagley SJ 2017        | 0.73 | 0.2379 |              | 2.07 | [1.30; 3.30]  | 0.4%           | 4.6%            |
| Mitchell P 2015       | 0.11 | 0.0915 |              | 1.12 | [0.94; 1.34]  | 2.9%           | 5.9%            |
| Aguiar-Bujanda D 2018 | 1.01 | 0.4016 |              | 2.74 | [1.25; 6.02]  | 0.2%           | 3.2%            |
| Zhang Y 2018          | 0.71 | 0.3201 |              | 2.04 | [1.09; 3.82]  | 0.2%           | 3.8%            |
| Minami S 2017         | 0.07 | 0.0323 |              | 1.07 | [1.00; 1.14]  | 23.5%          | 6.1%            |
| Meriggi F 2017        | 0.99 | 0.4192 |              | 2.70 | [1.19; 6.14]  | 0.1%           | 3.0%            |
| Chen YM 2016          | 0.85 | 0.4111 |              | 2.35 | [1.05; 5.26]  | 0.1%           | 3.1%            |
| Berardi R 2016        | 0.55 | 0.1662 |              | 1.74 | [1.26; 2.41]  | 0.9%           | 5.3%            |
| Lee Y 2012            | 0.05 | 0.0237 |              | 1.05 | [1.00; 1.10]  | 43.7%          | 6.1%            |

**Pooled HR by Fixed Effects** 1.10 [1.07; 1.14] 100.0%  
**Pooled HR by Random Effects** 1.87 [1.53; 2.29] 100.0%  
**Prediction interval** [0.77; 4.52]  
 Heterogeneity:  $I^2 = 83%$  [75%; 88%],  $\chi^2_{23} = 134.01$  ( $p < 0.01$ )

Tau<sup>2</sup> = 0.413

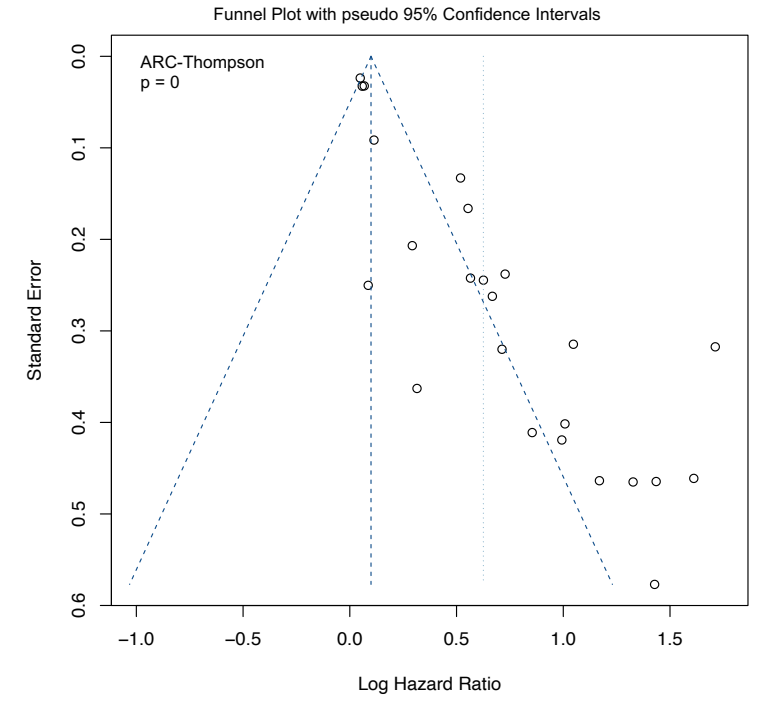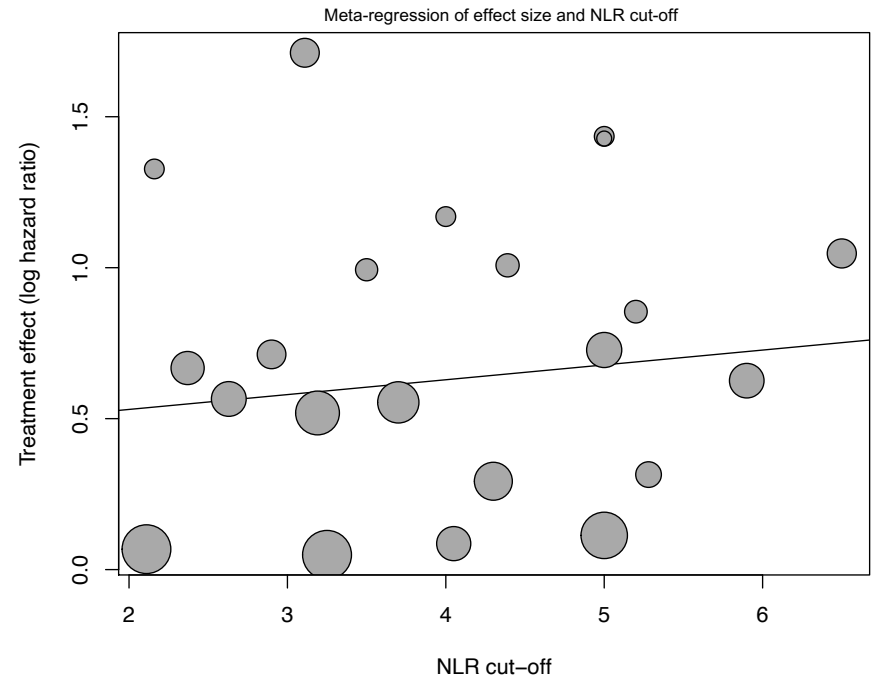

### Supplementary Figure 159 - NLR: PFS in NSCLC (ST)

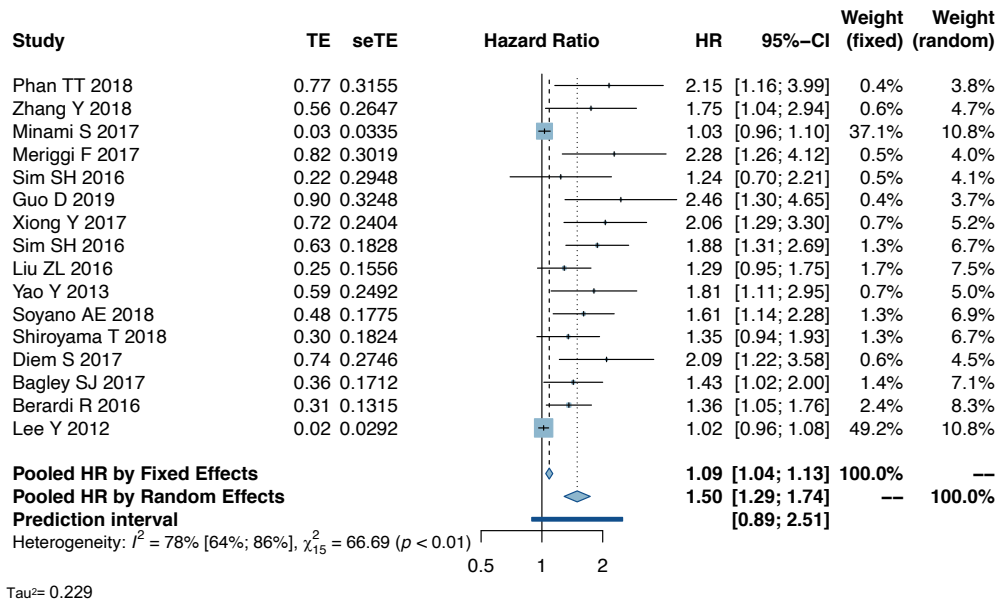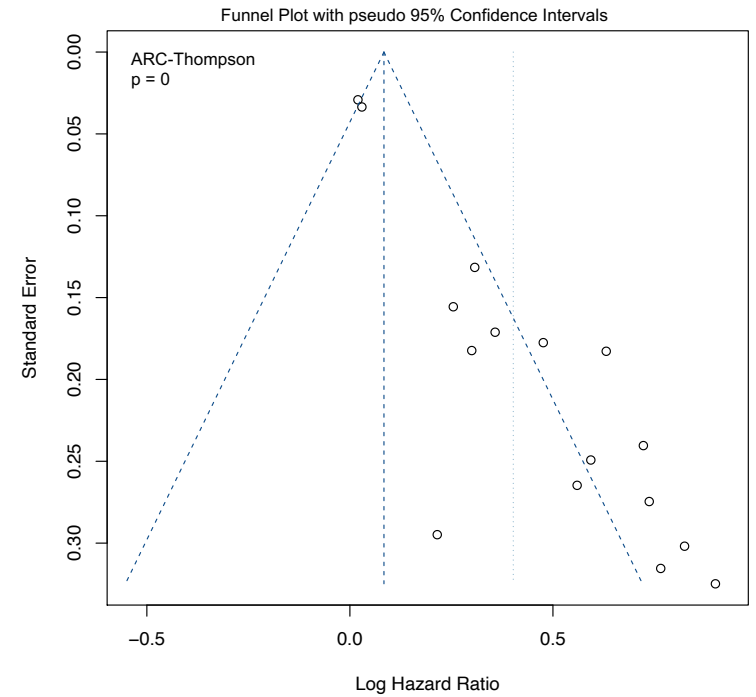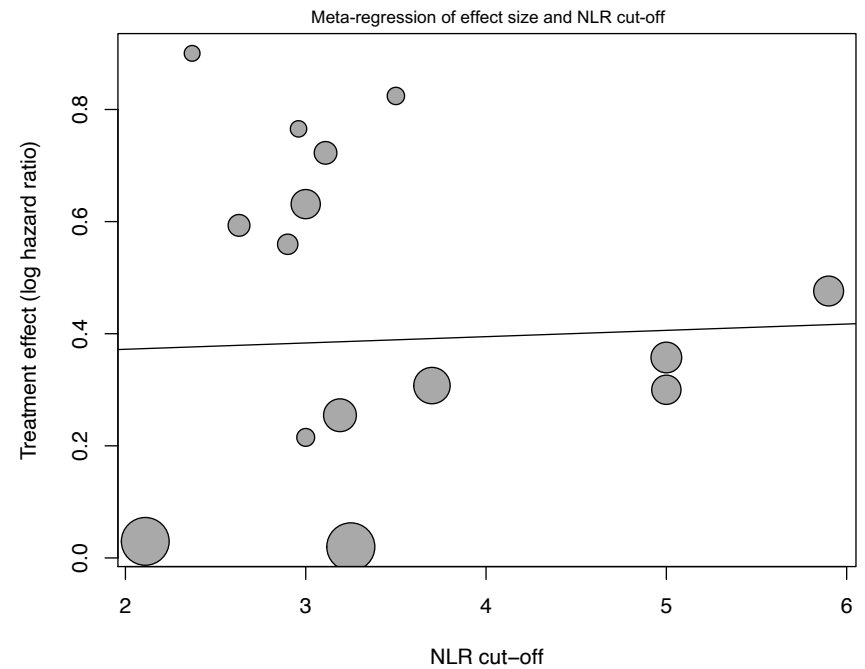



Supplementary Figure 160 - NLR: OS in Head and Neck

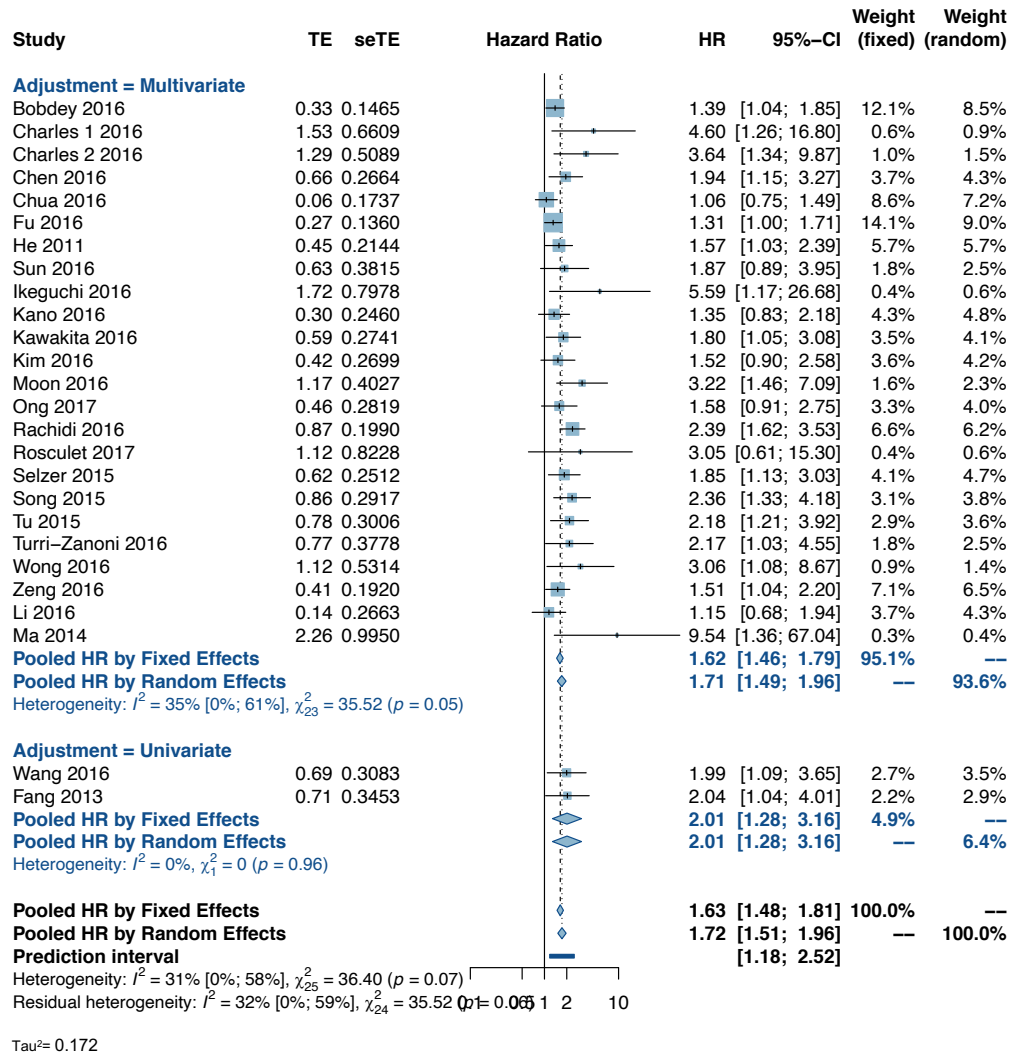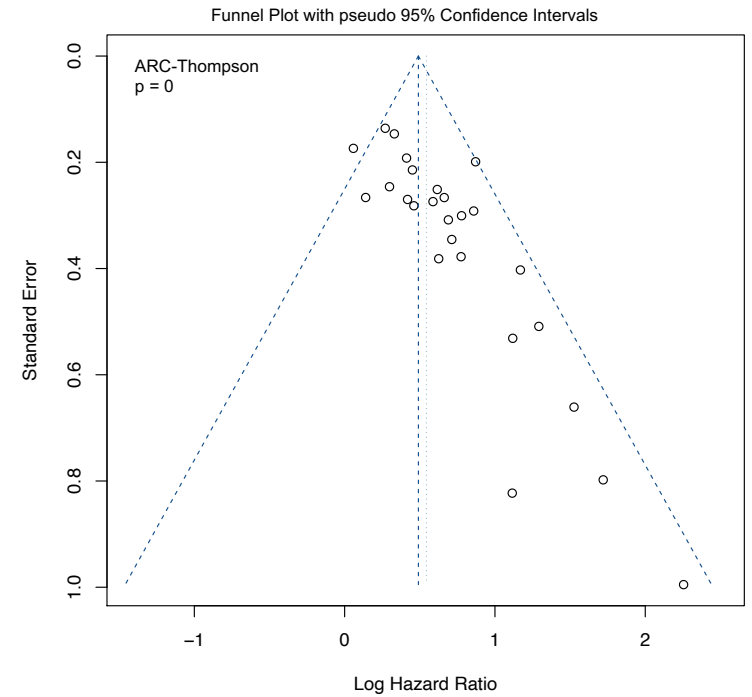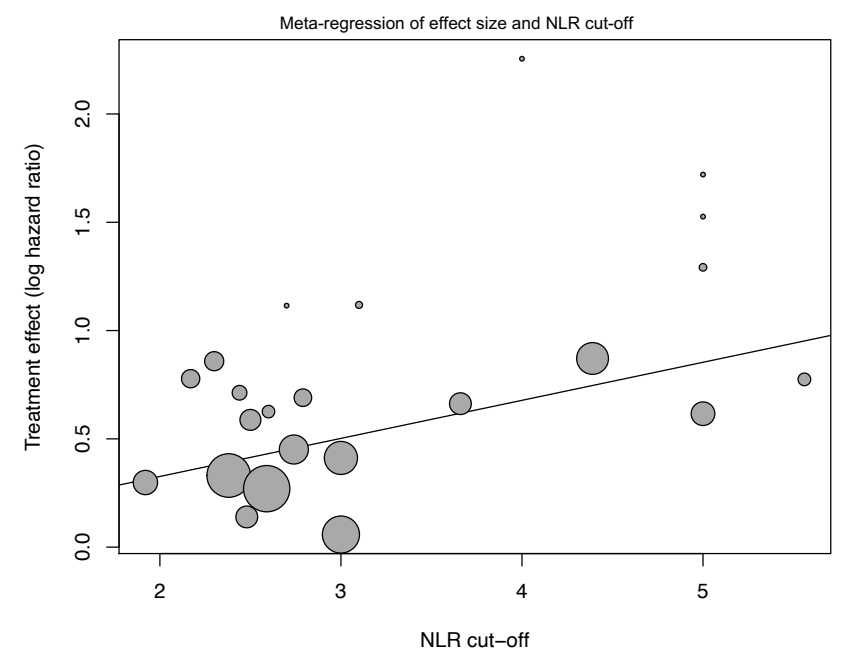

Supplementary Figure 161 - NLR: PFS in Head and neck

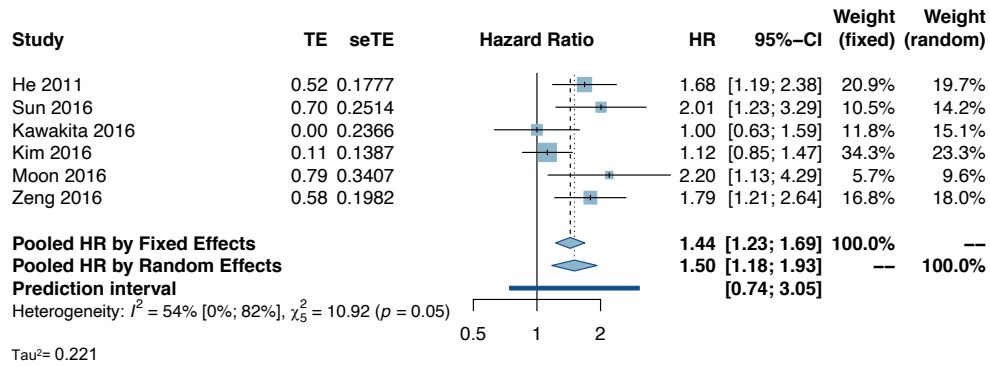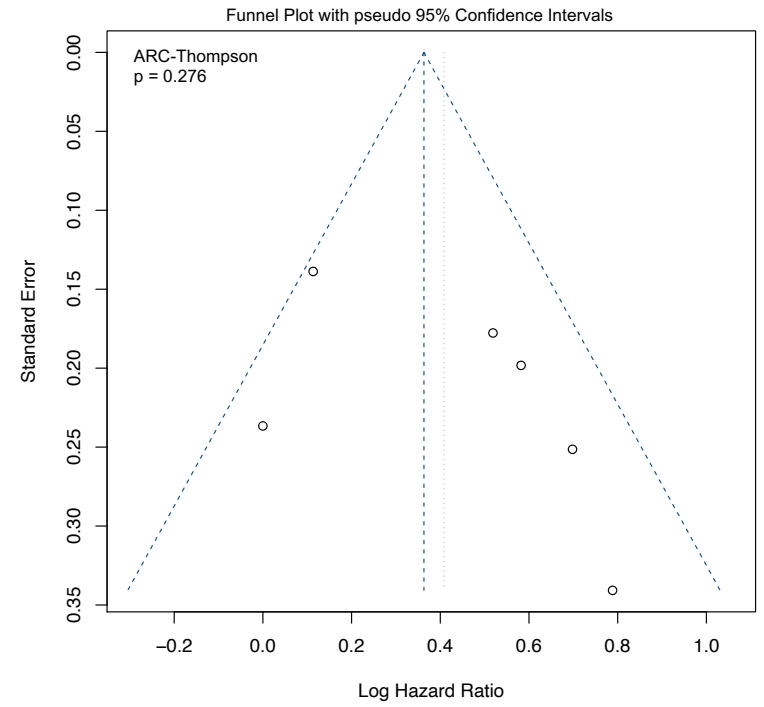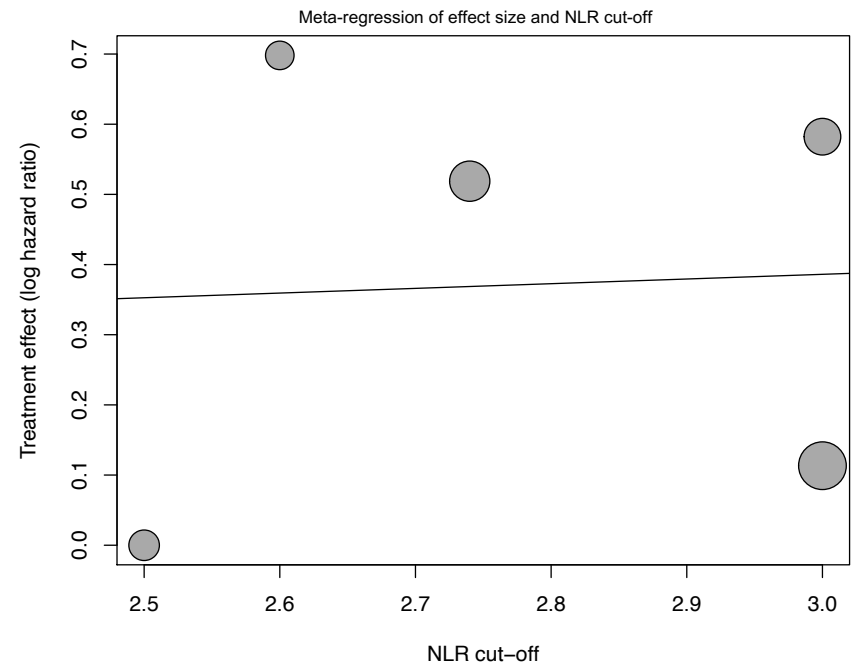

Supplementary Figure 162 - NLR: DFS in Head and neck

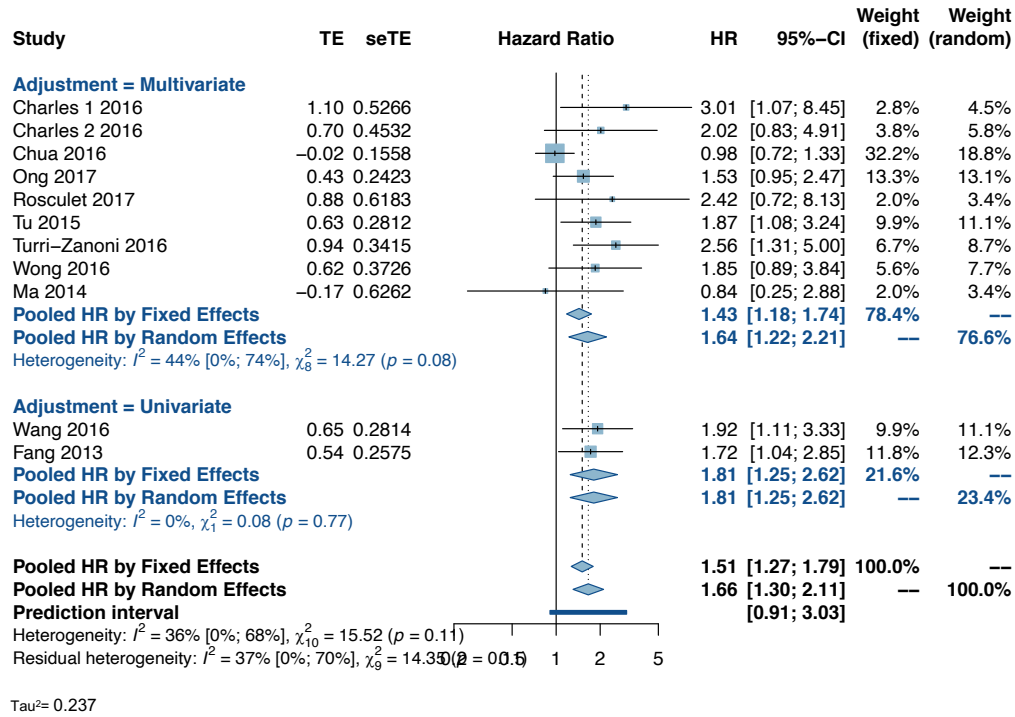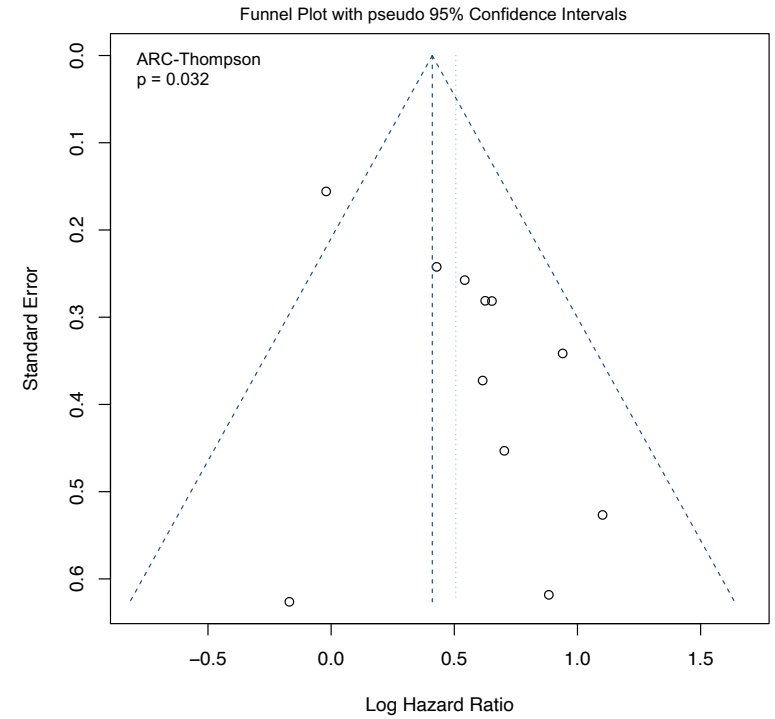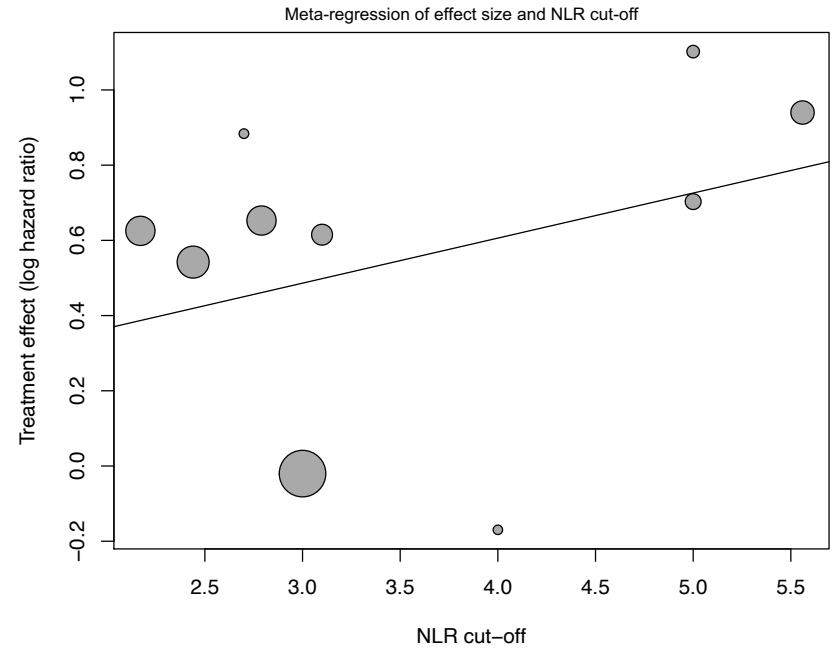

### Supplementary Figure 163 - NLR: OS in Head and Neck (SCC)

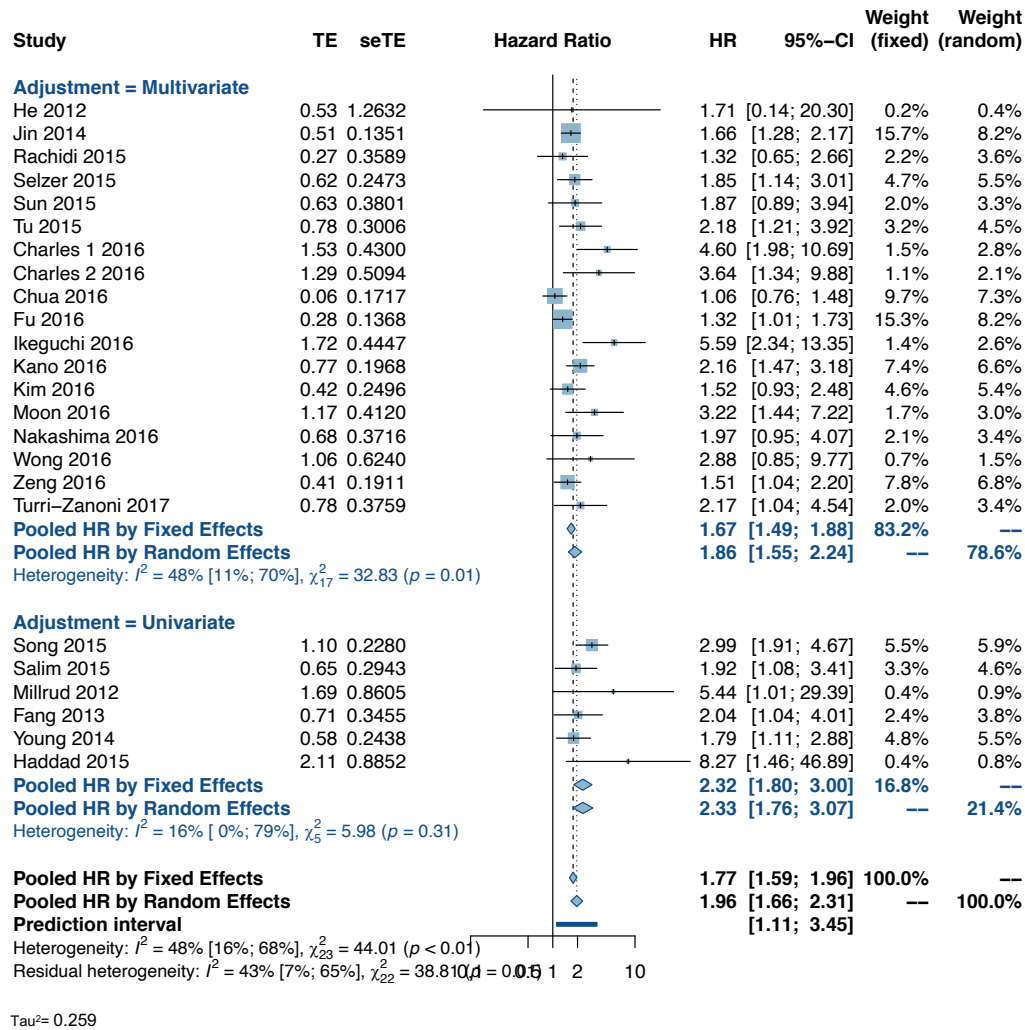

Tau<sup>2</sup> = 0.259

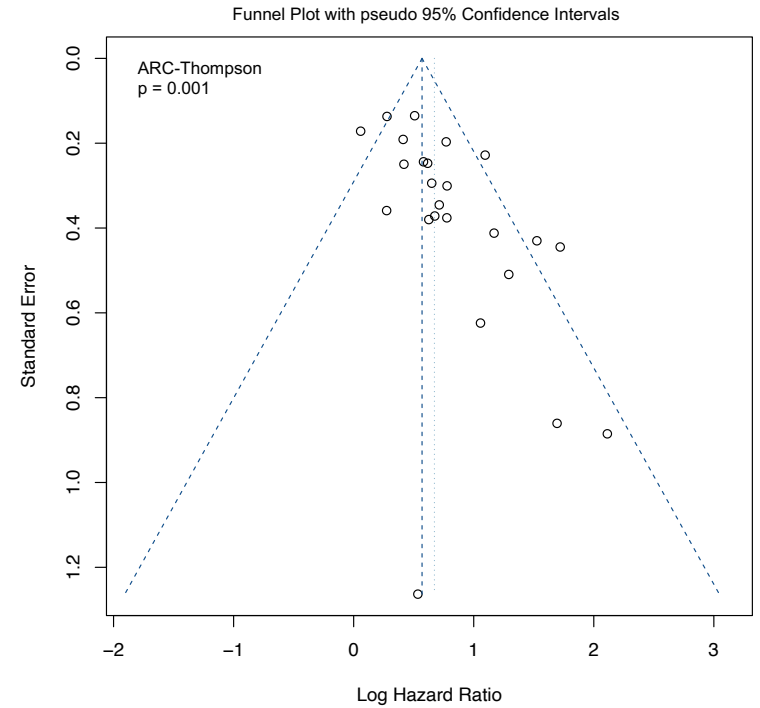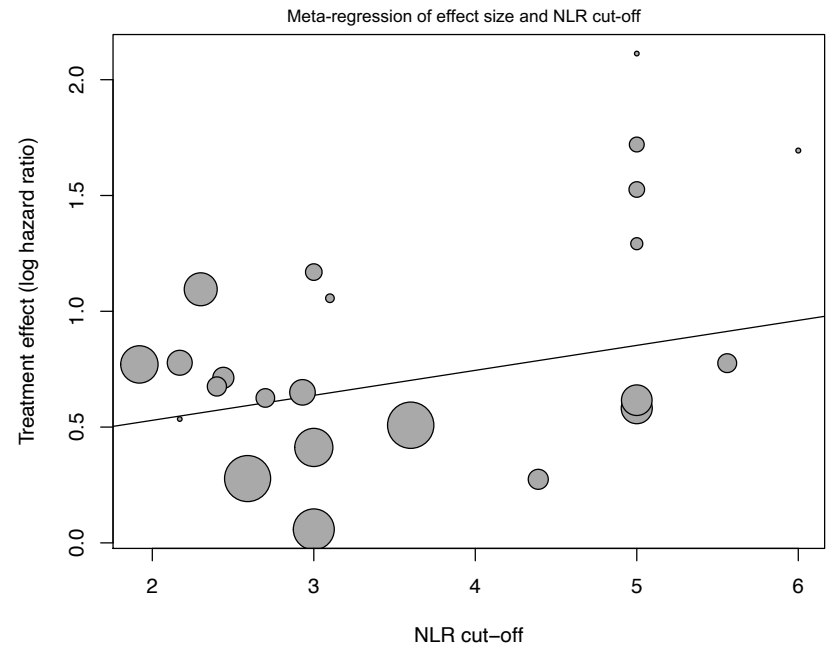

Supplementary Figure 164 - NLR: DFS in Head and Neck (SCC)

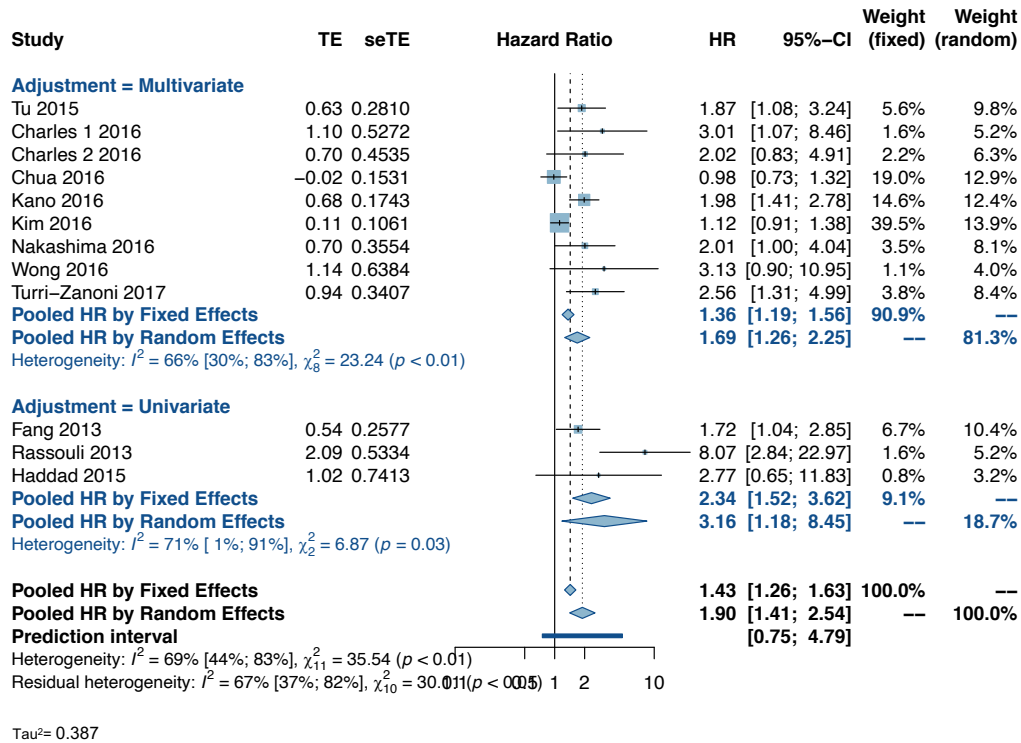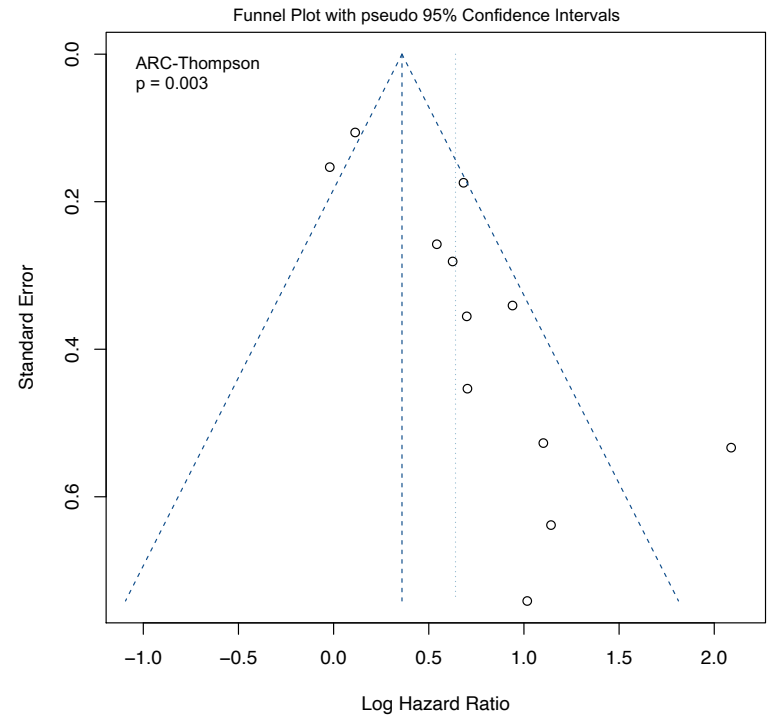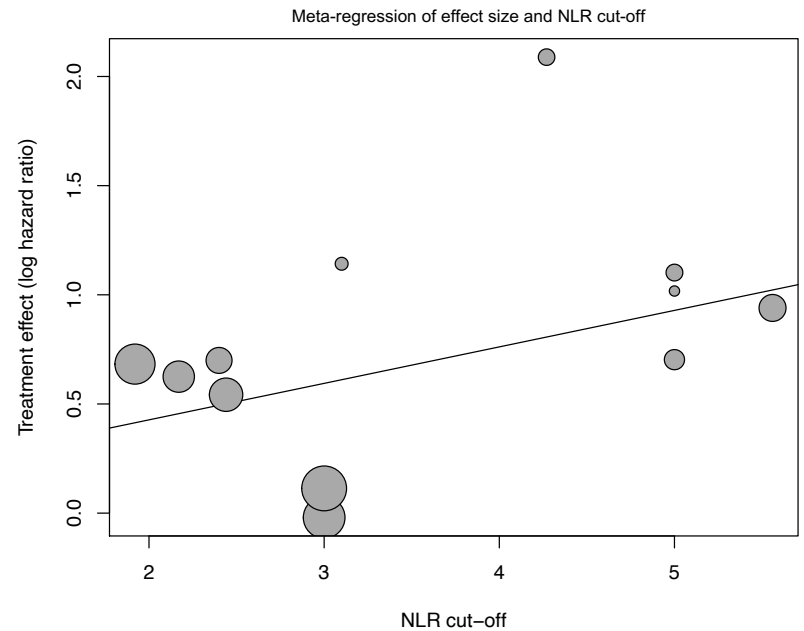

**Supplementary Figure 165 - NLR: OS in Head and Neck (No Surgery)**

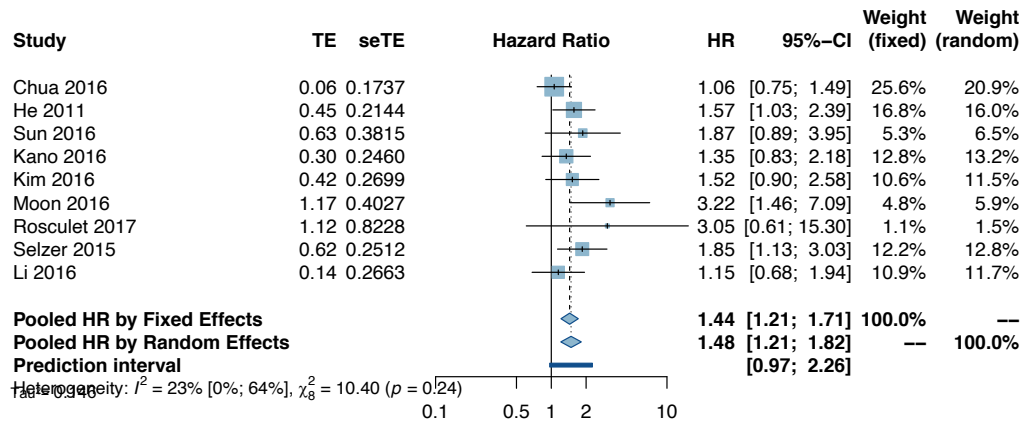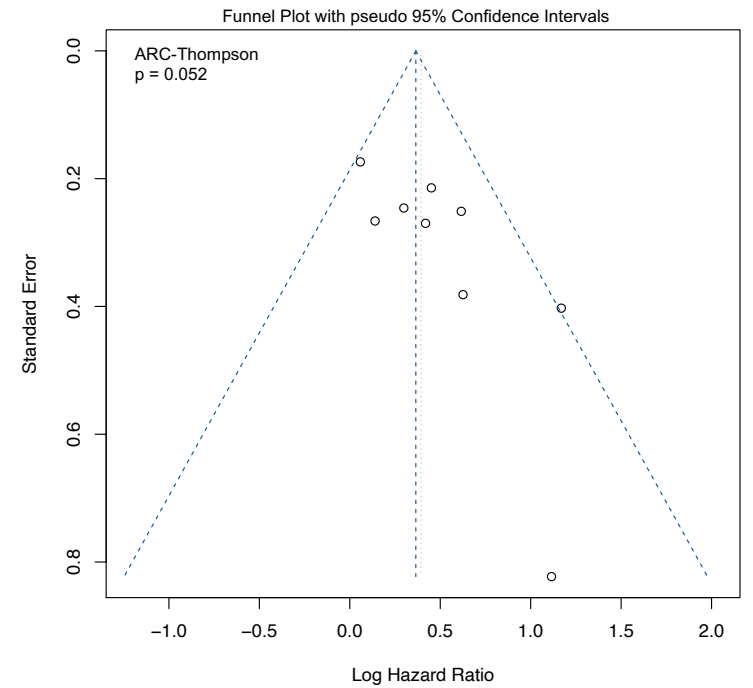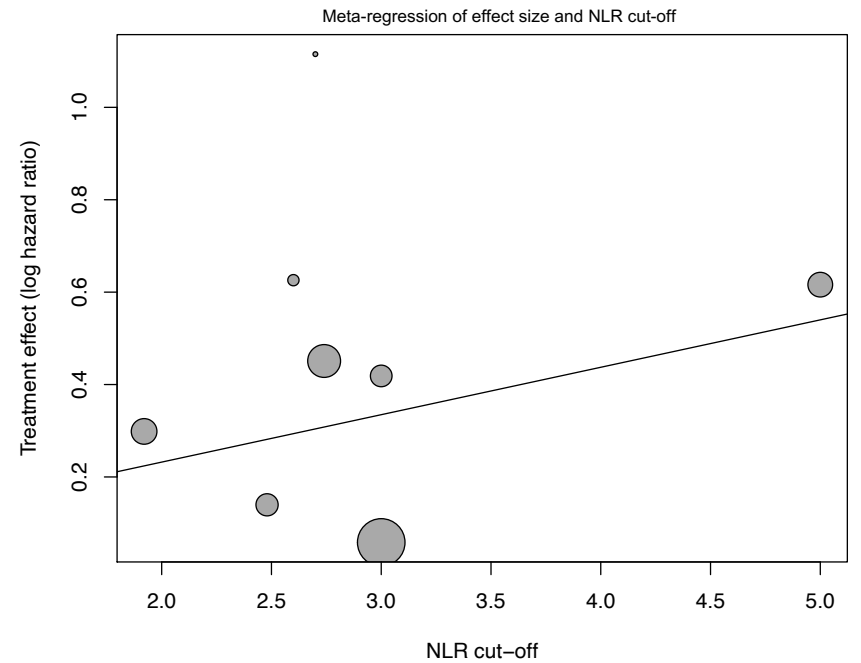

Supplementary Figure 166 - NLR: CSS in Head and Neck (SCC)

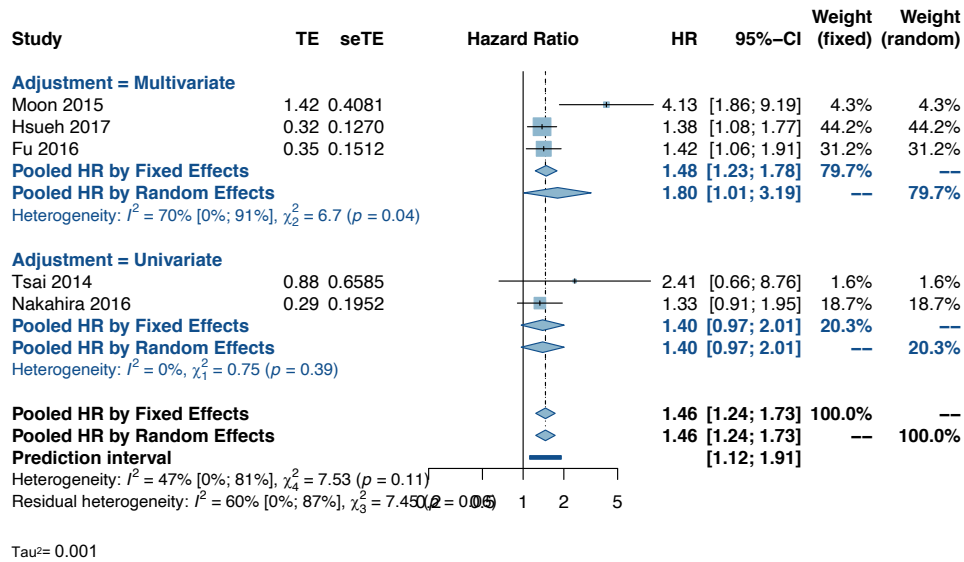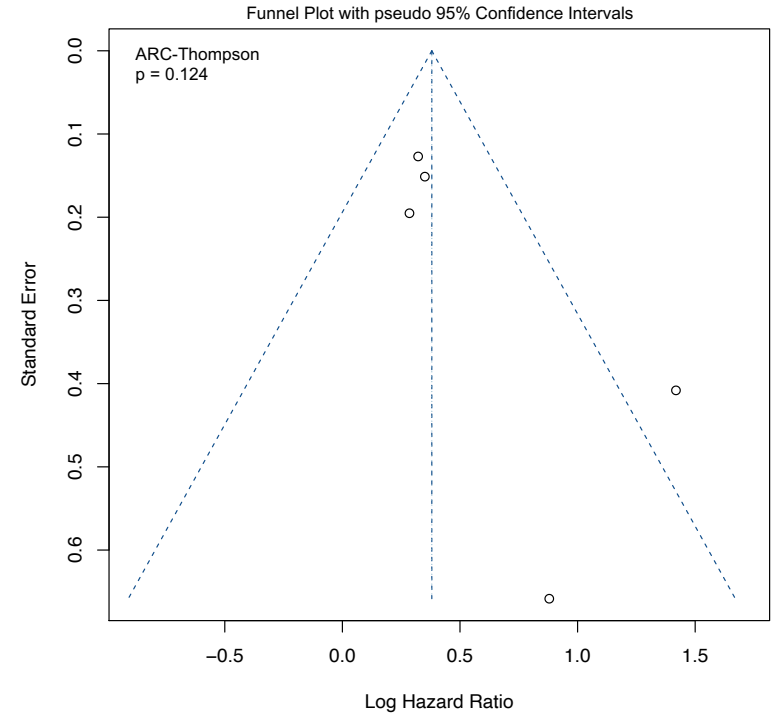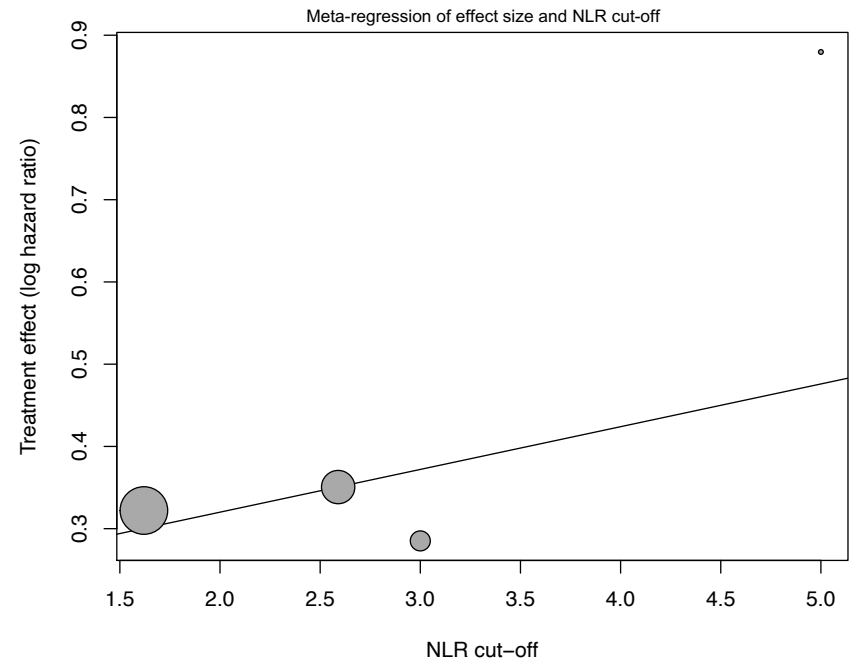

**Supplementary Figure 167 - NLR: PFS in Head and Neck (SCC)**

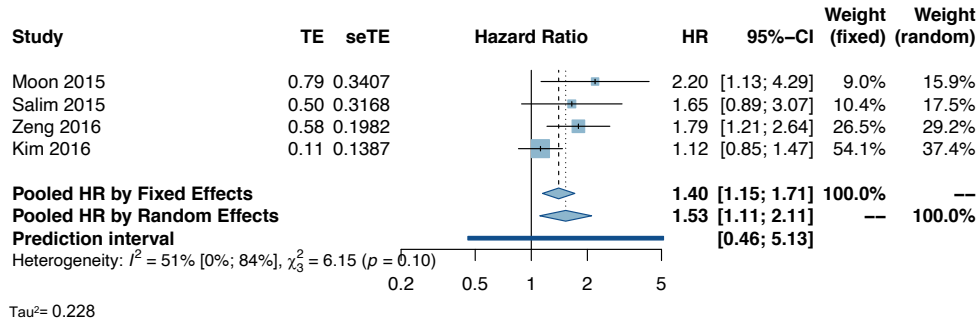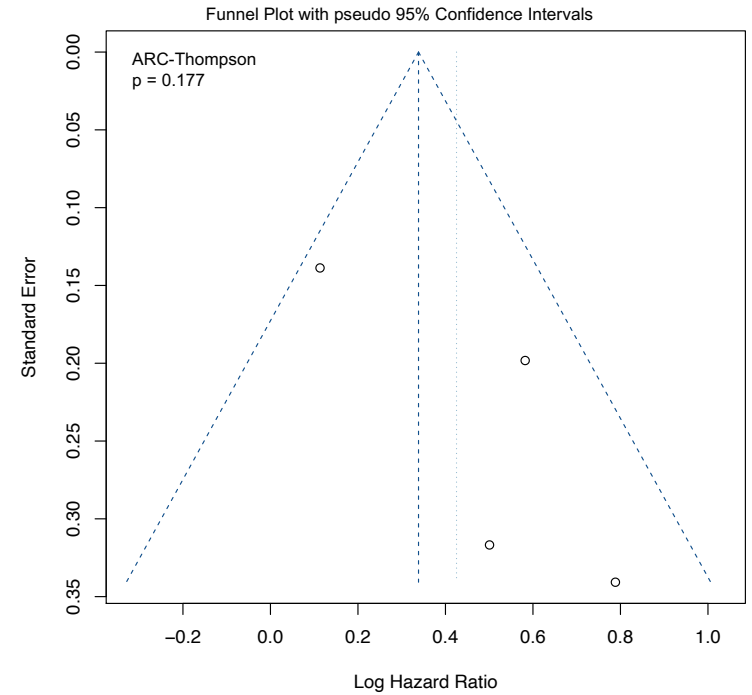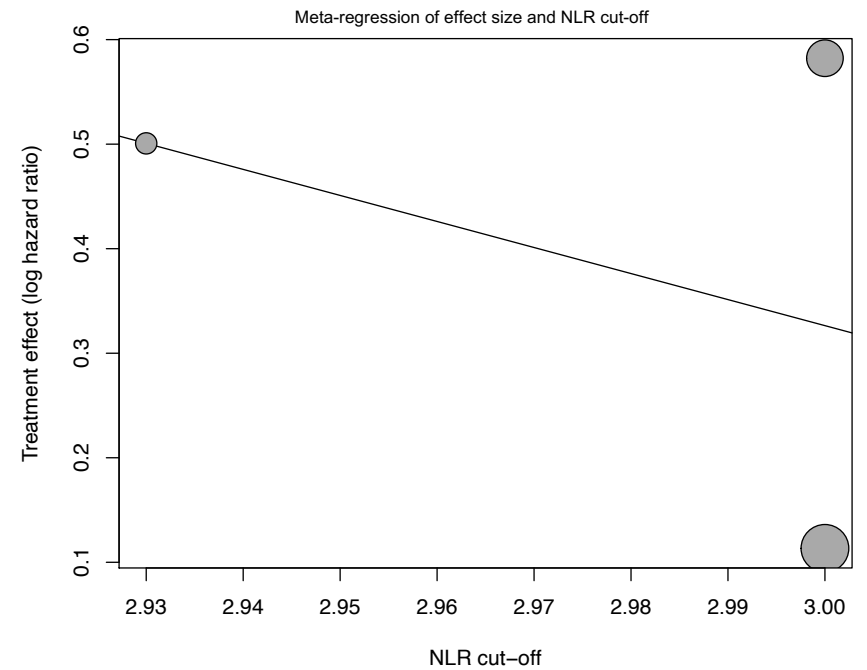



**Supplementary Figure 168 - NLR: OS in Head and Neck (SR)**

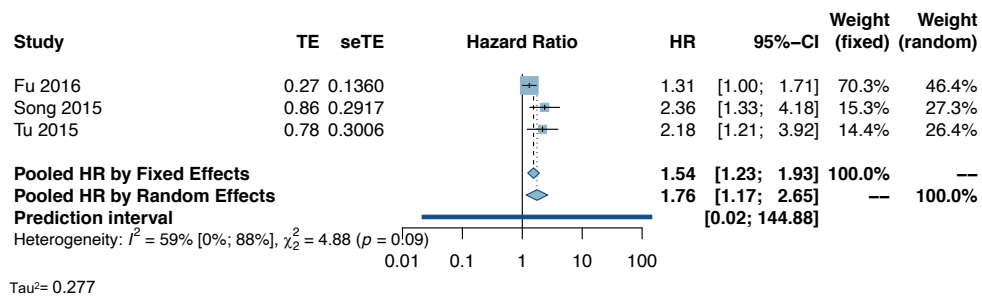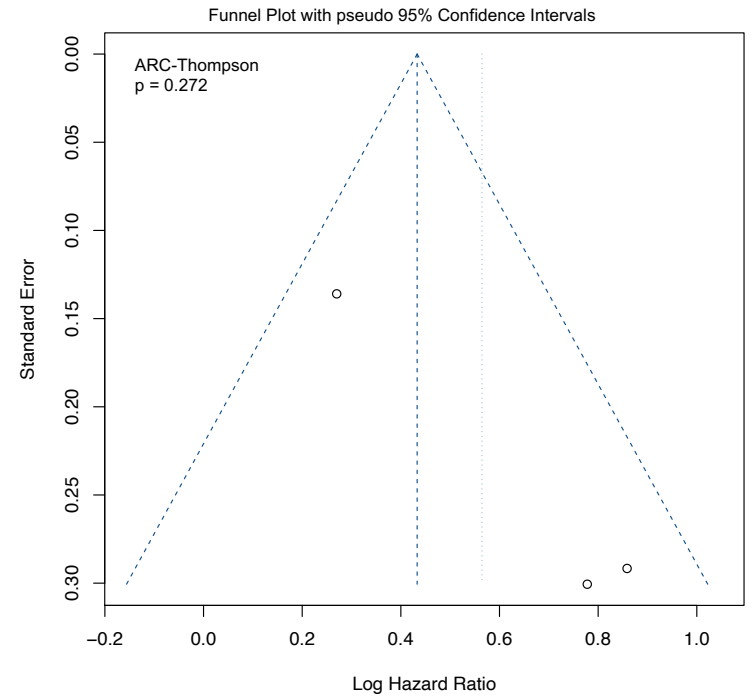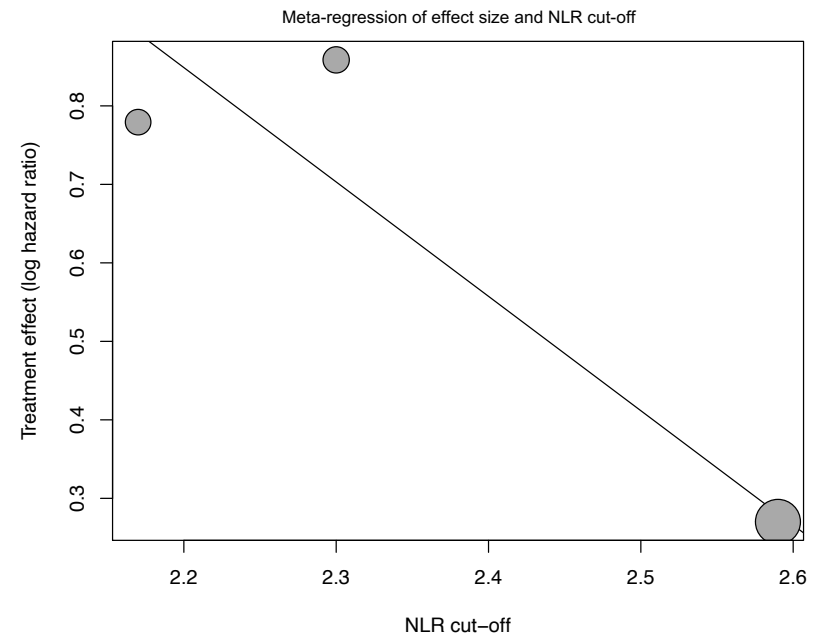

Supplementary Figure 169 - NLR: OS in Hypopharynx

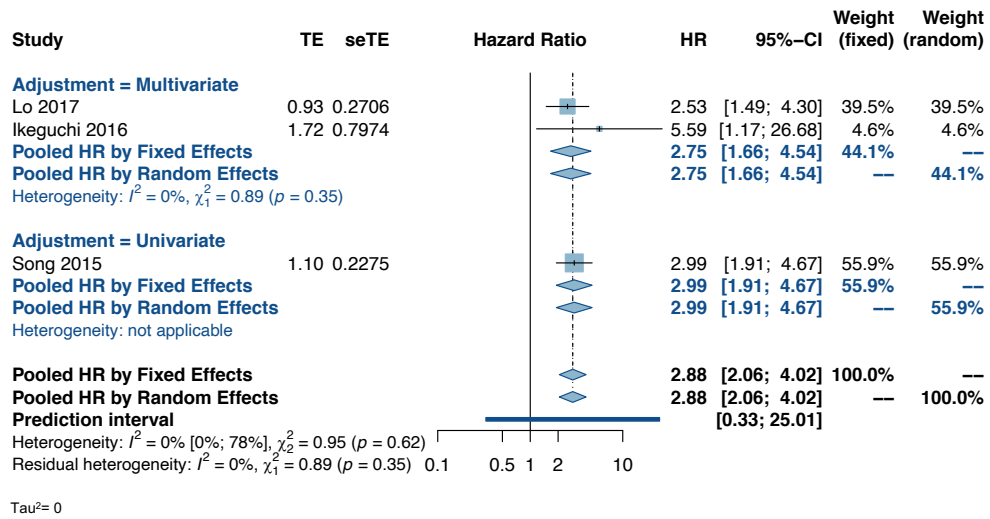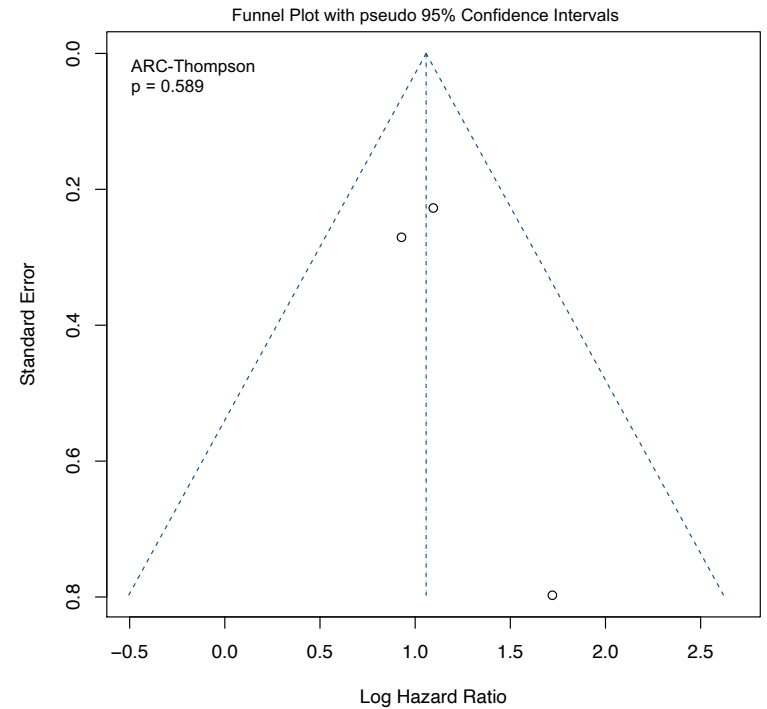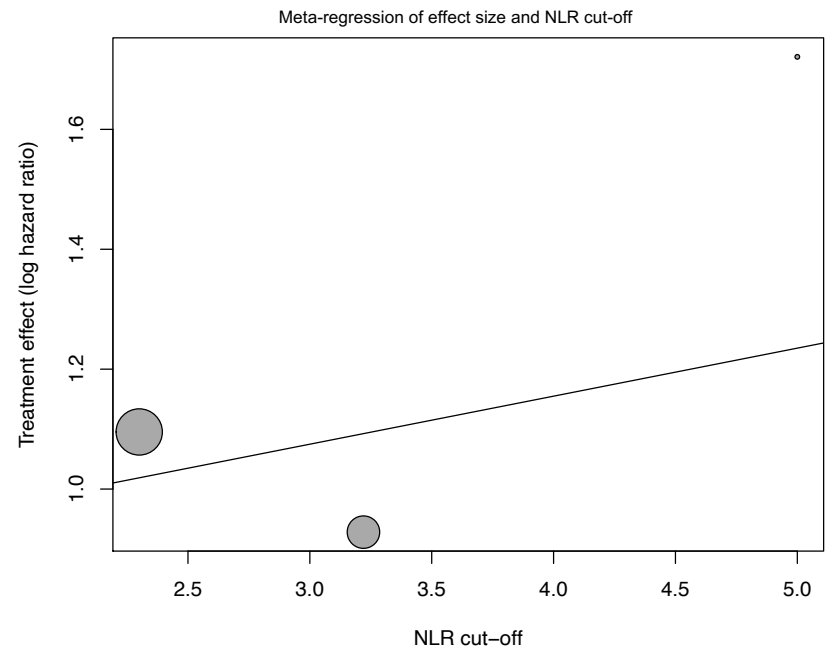

Supplementary Figure 170 - NLR: DFS in Larynx

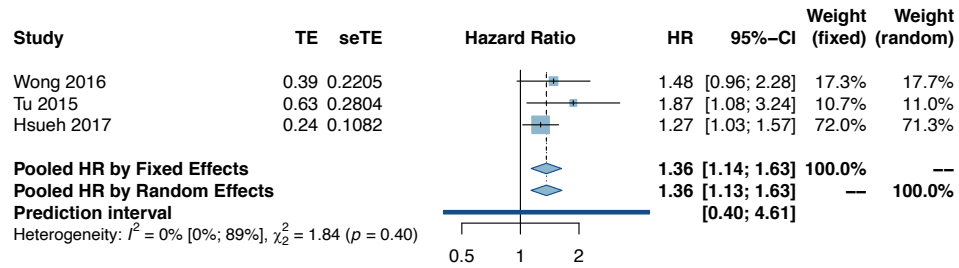

Tau<sup>2</sup> = 0.022

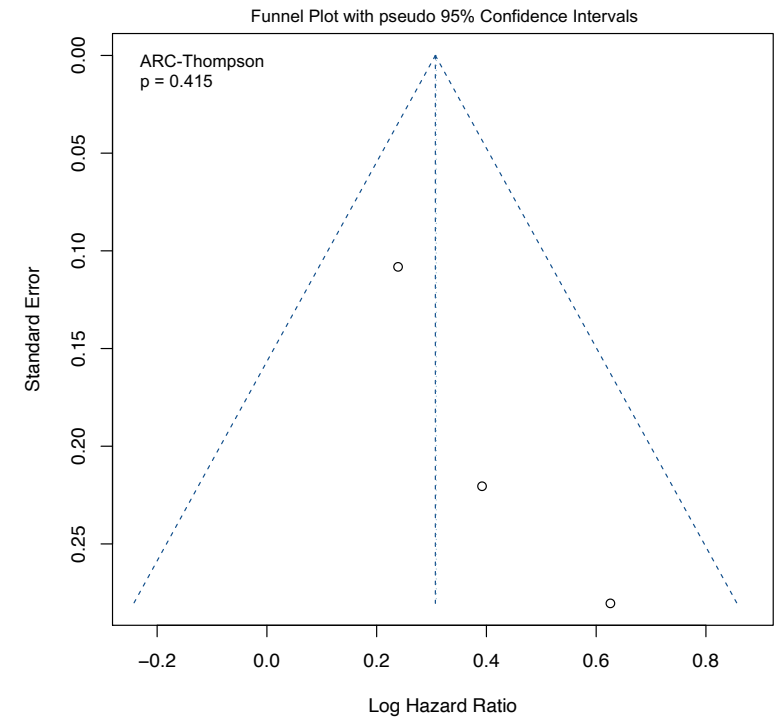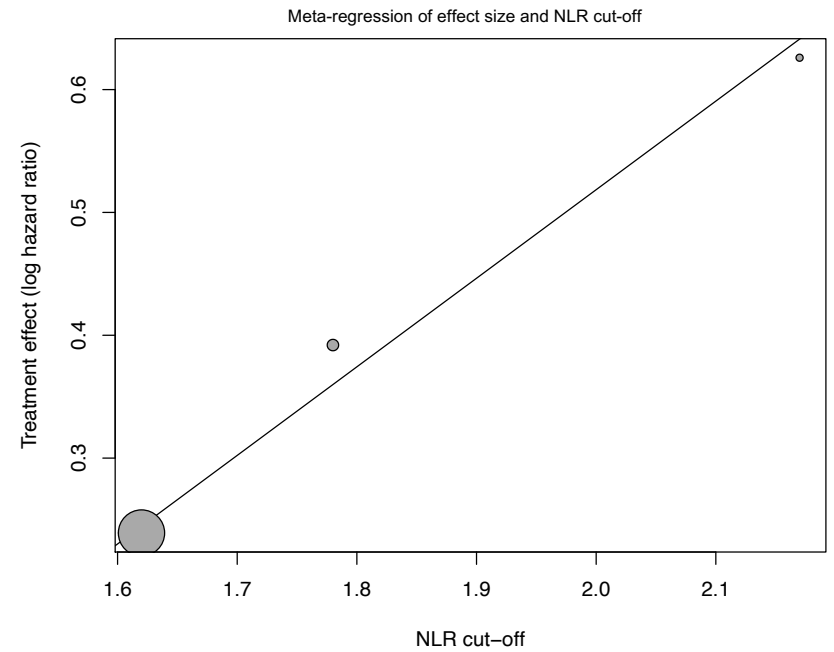

Supplementary Figure 171 - NLR: OS in Nasopharyngeal

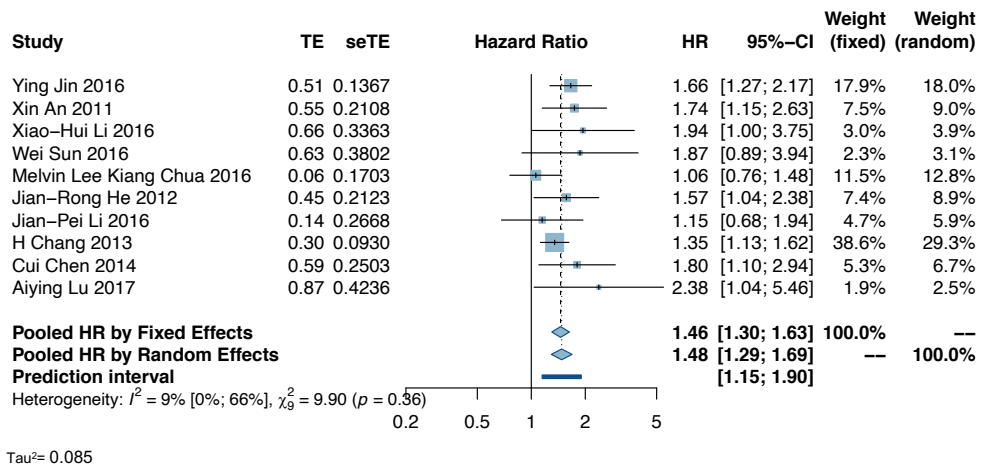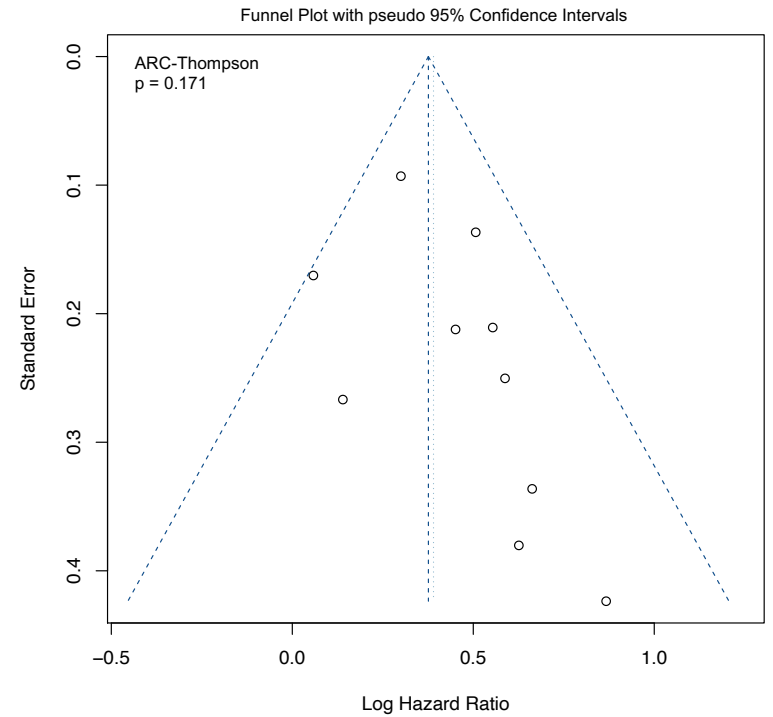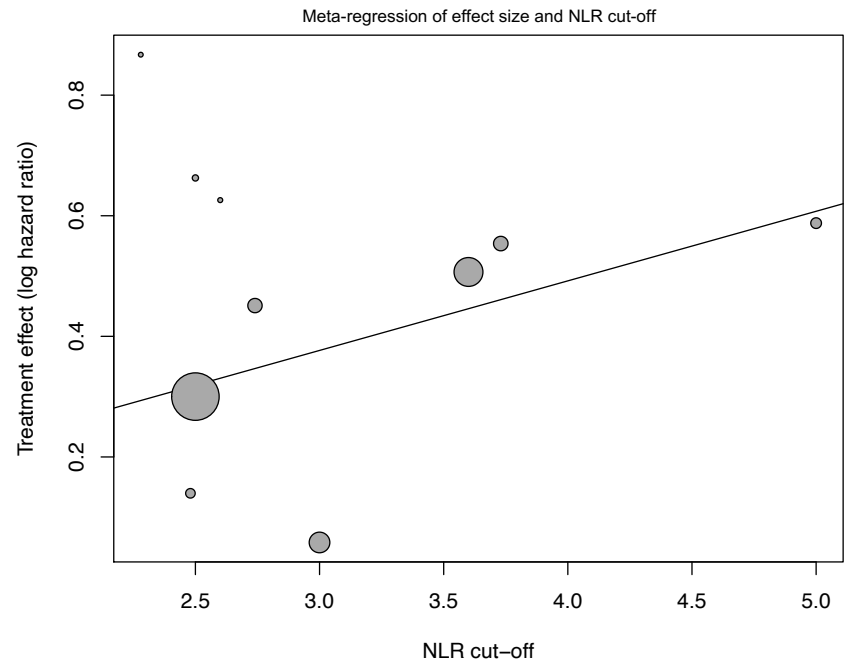

Supplementary Figure 172 - NLR: OS in Oral cavity

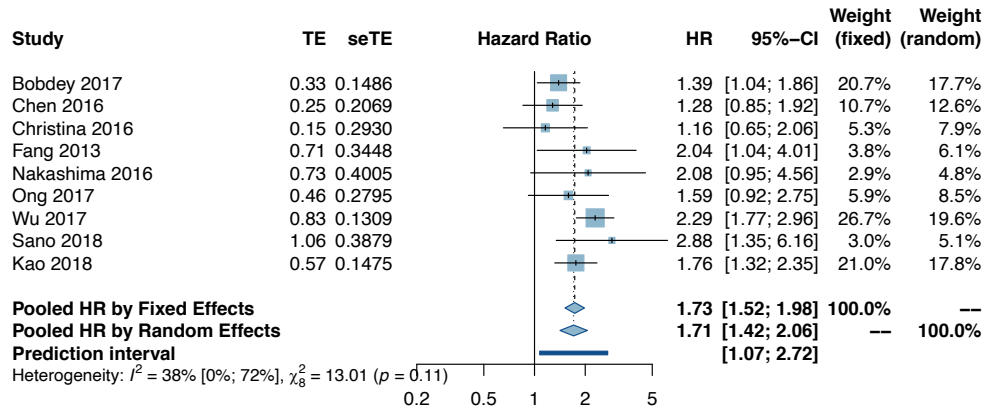

Tau<sup>2</sup> = 0.172

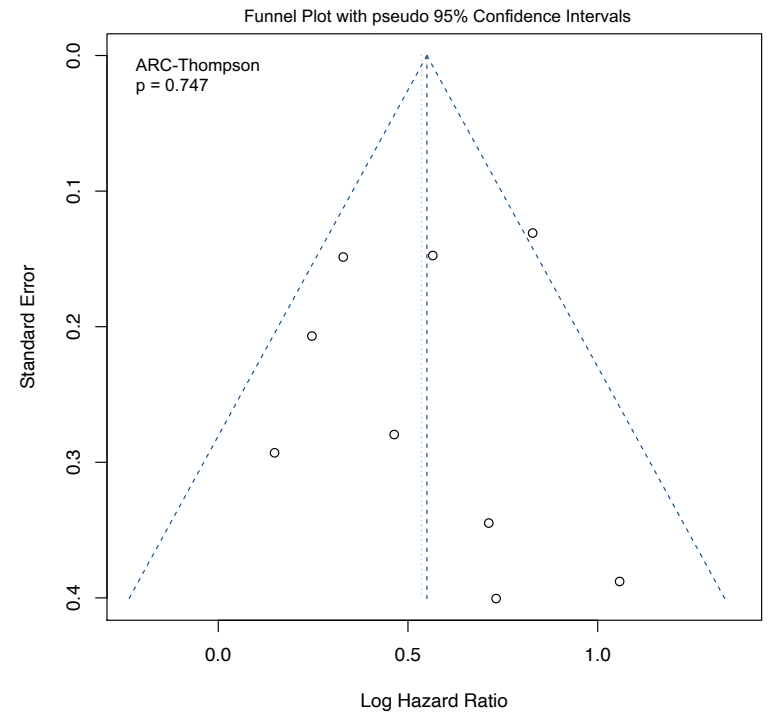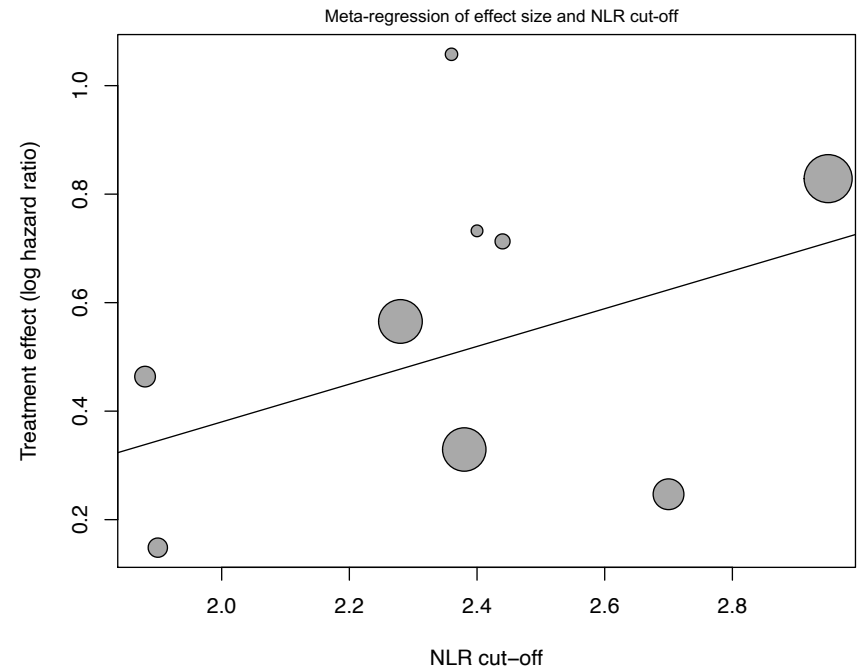

Supplementary Figure 173 - NLR: DFS in Oral cavity

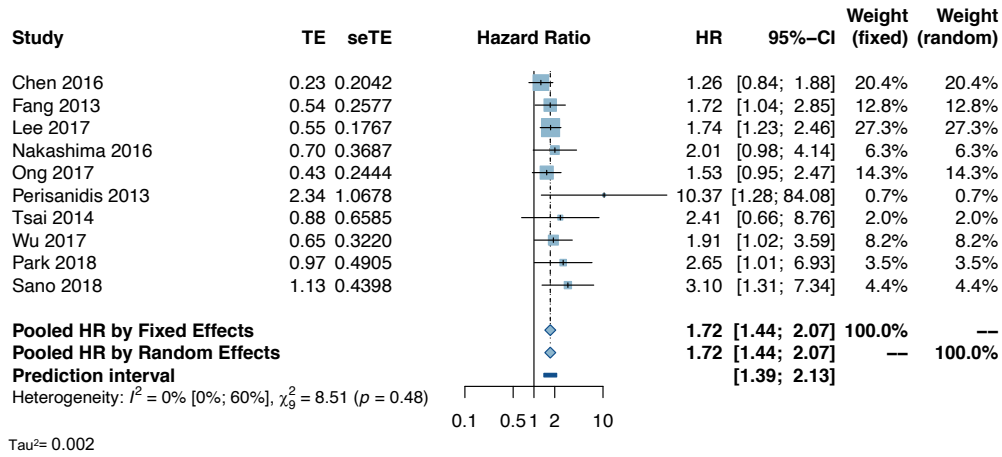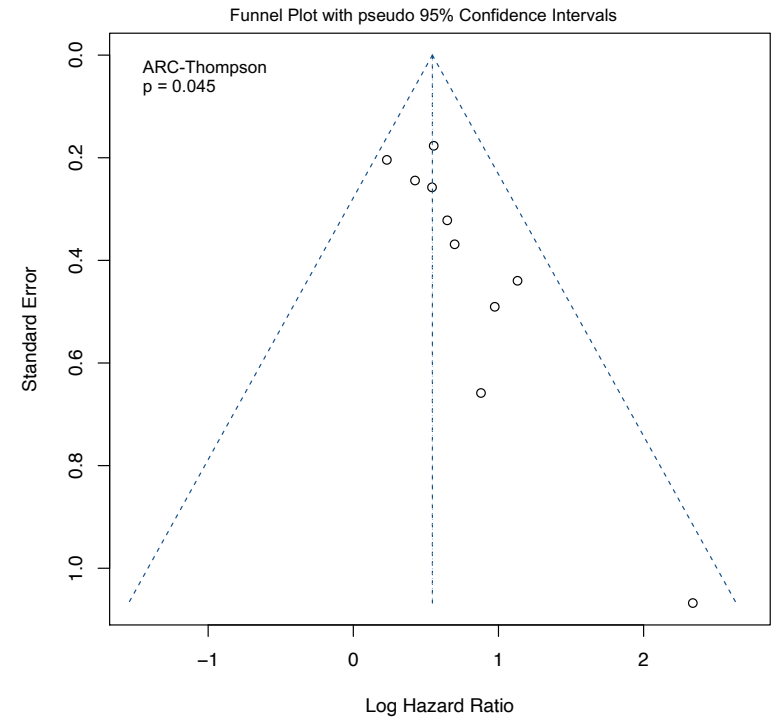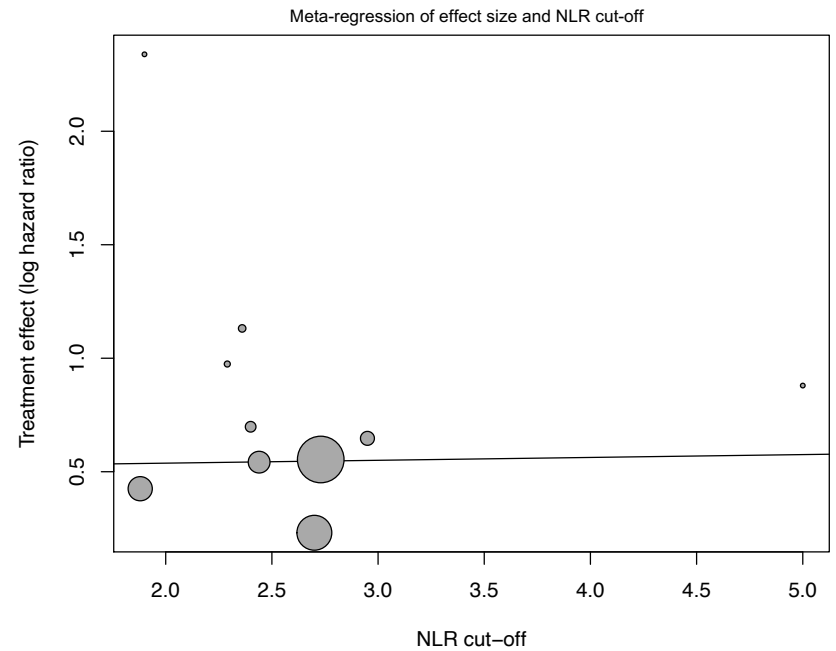

Supplementary Figure 174 - NLR: DFS in Oropharynx

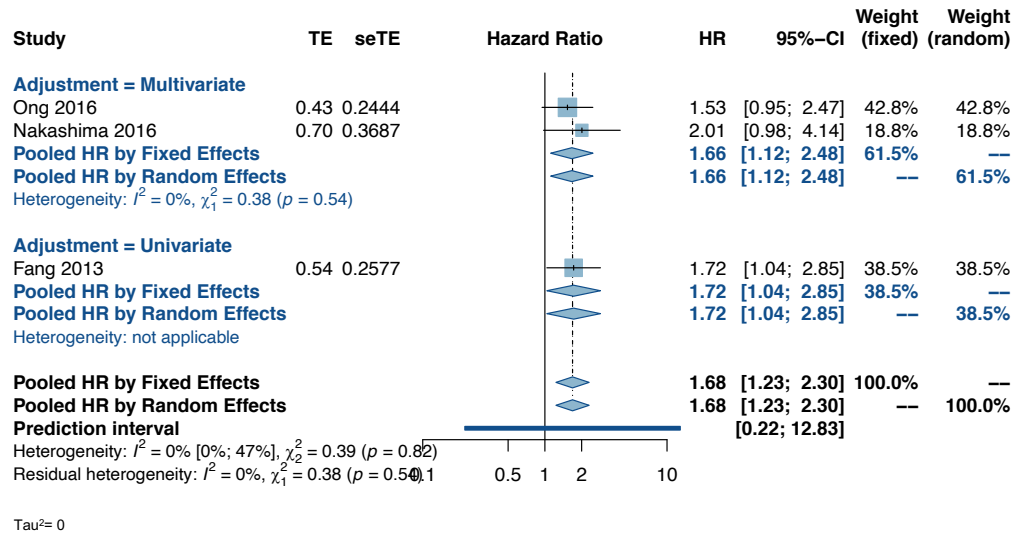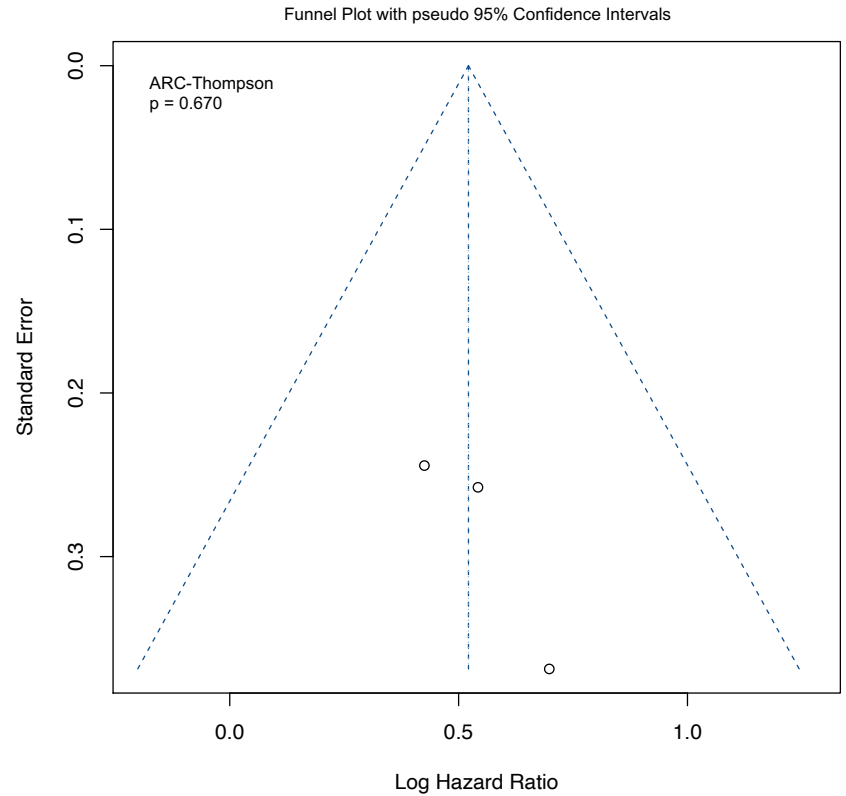

Supplementary Figure 175 - NLR: OS in Melanoma (Immune checkpoint inhibitors)

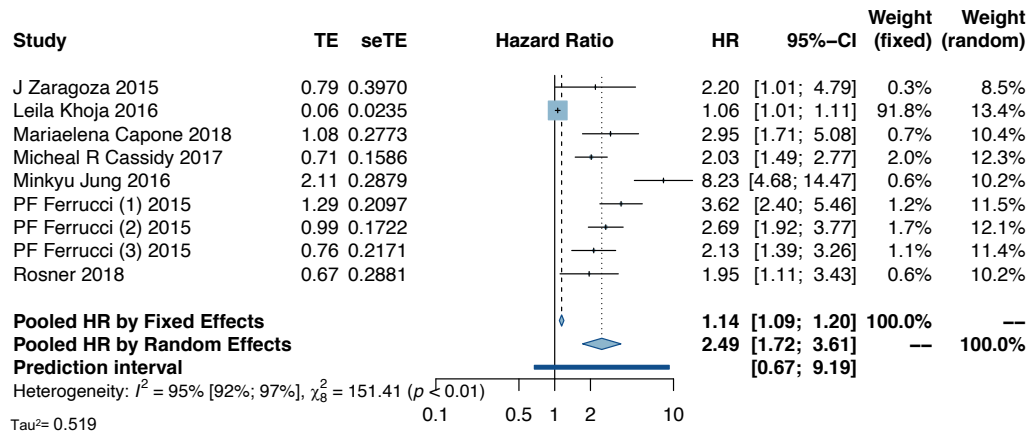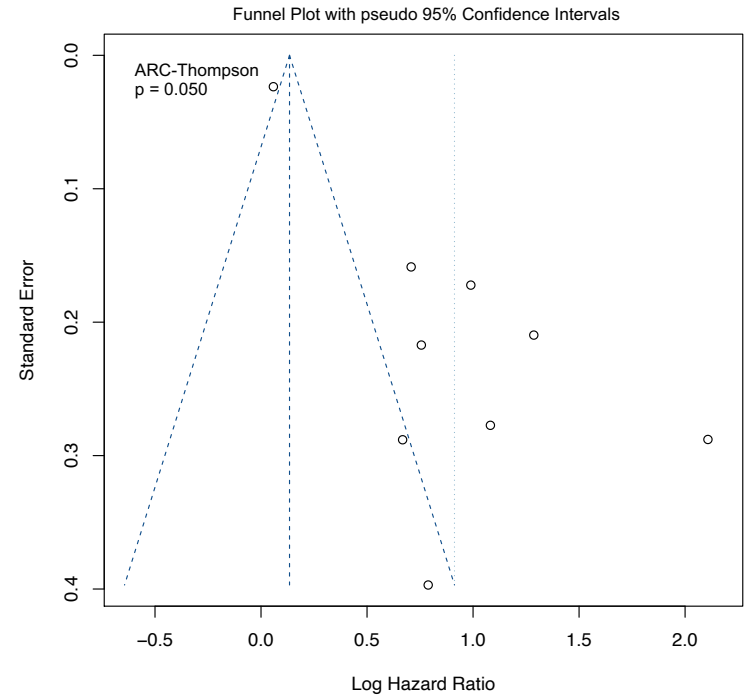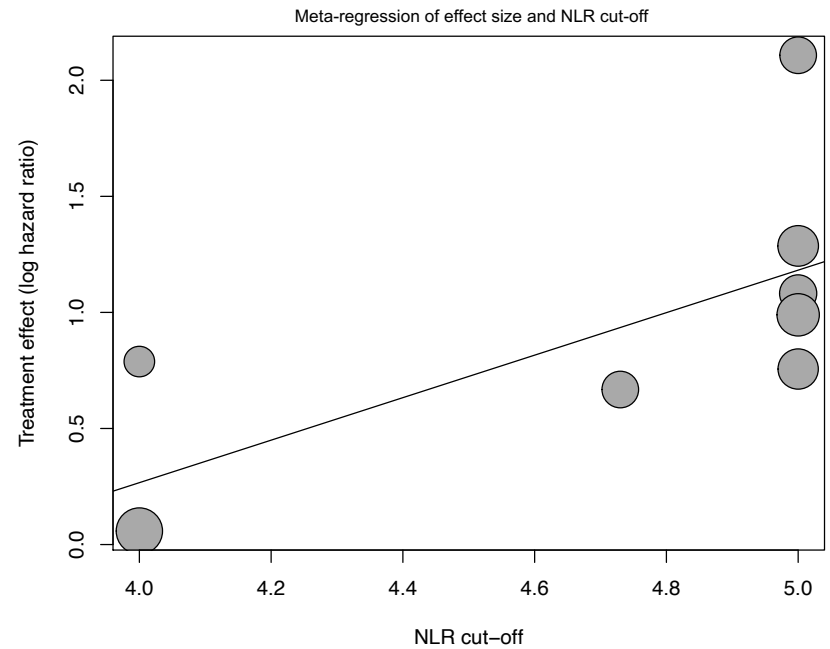



**Supplementary Figure 176 - NLR: PFS in Melanoma (Immune checkpoint inhibitors)**

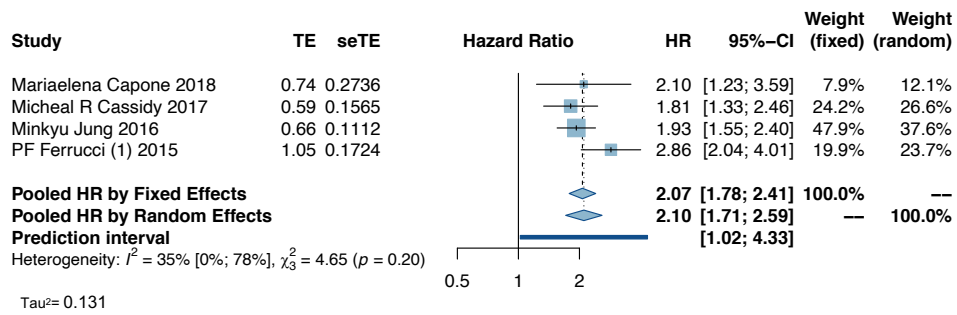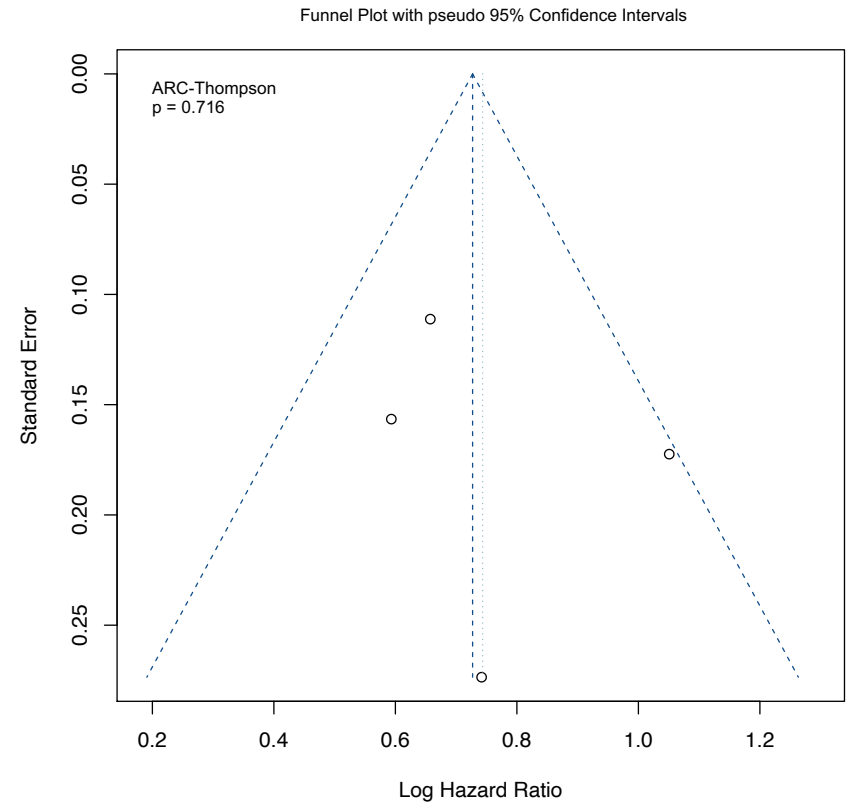

Supplementary Figure 177 - NLR: OS in Urothelial

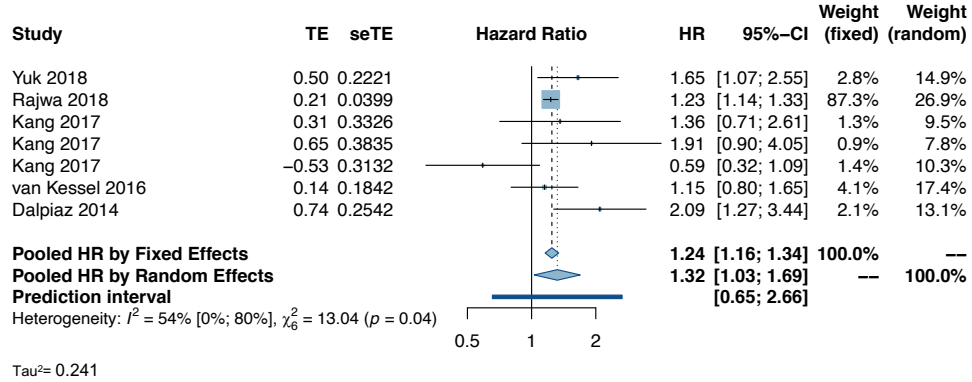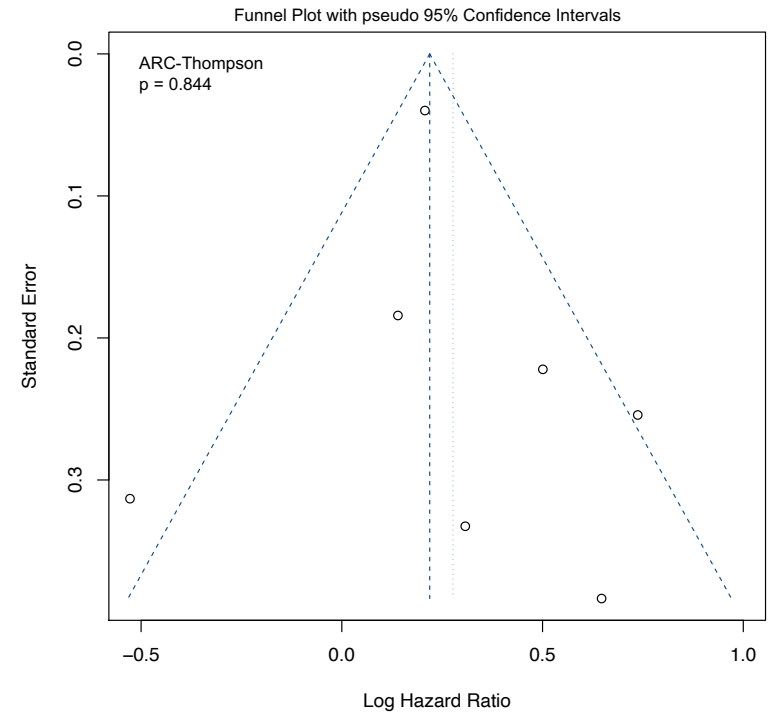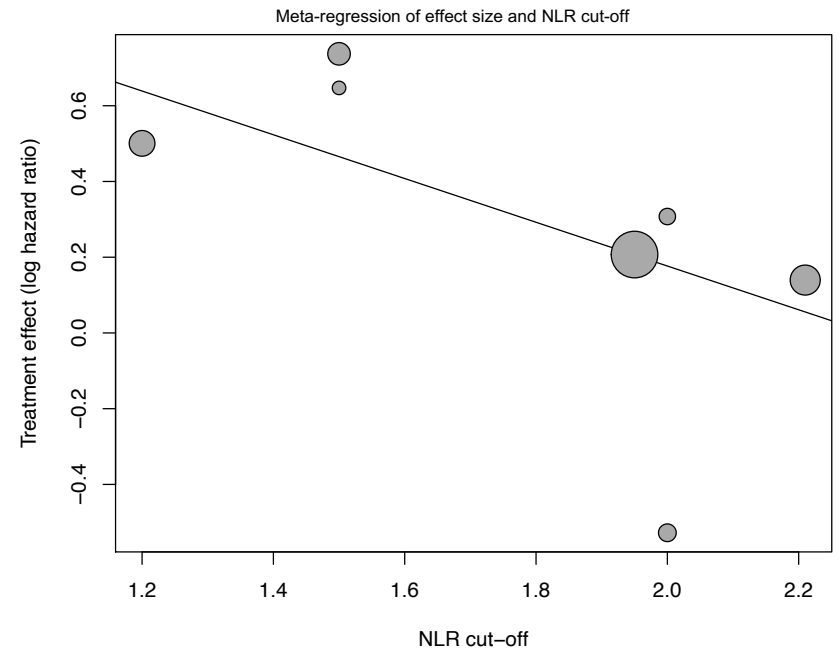

Supplementary Figure 178 - NLR: CSS in UTUC (Nephroureterectomy)

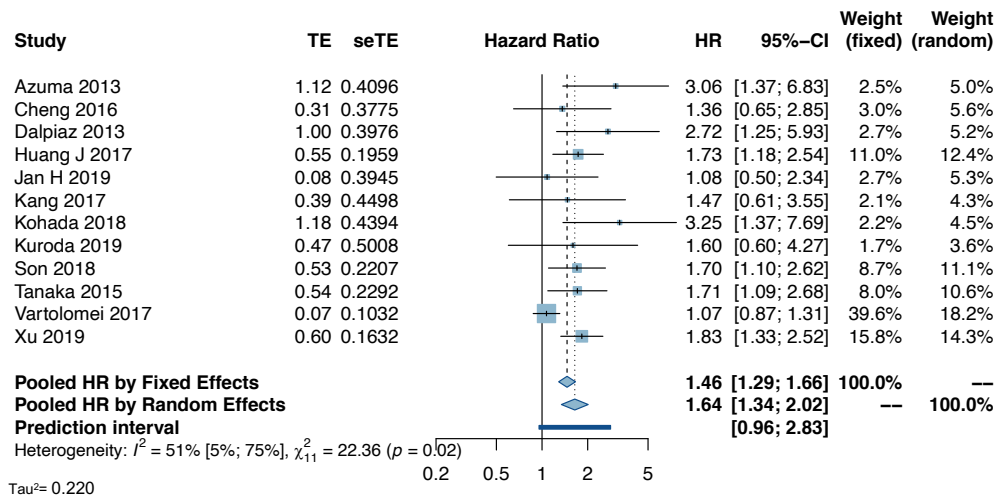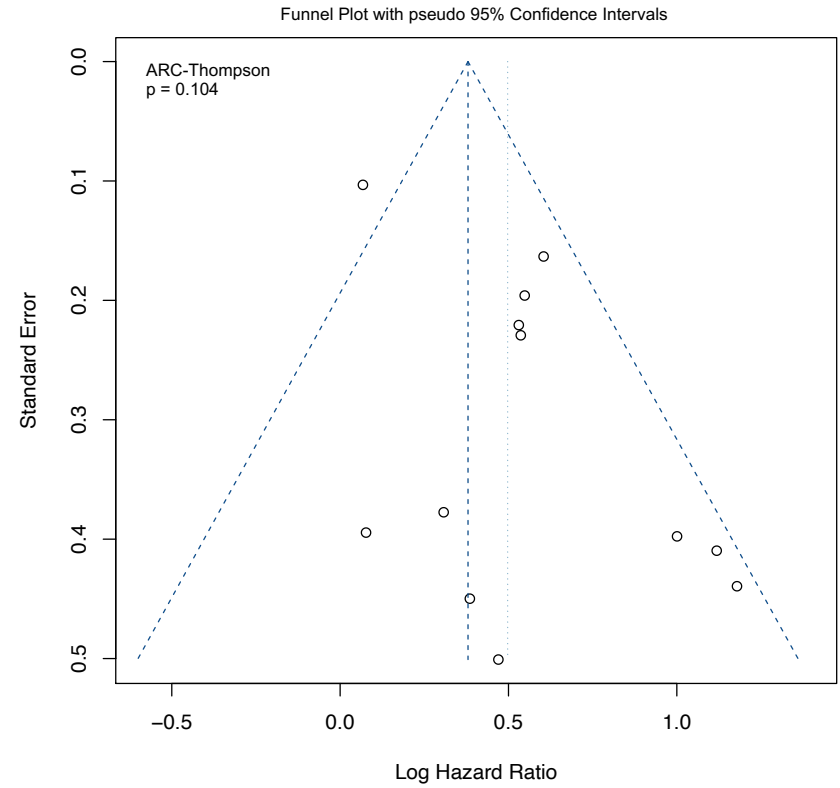

Supplementary Figure 179 - NLR: CSS in UTUC (Radical Cystectomy)

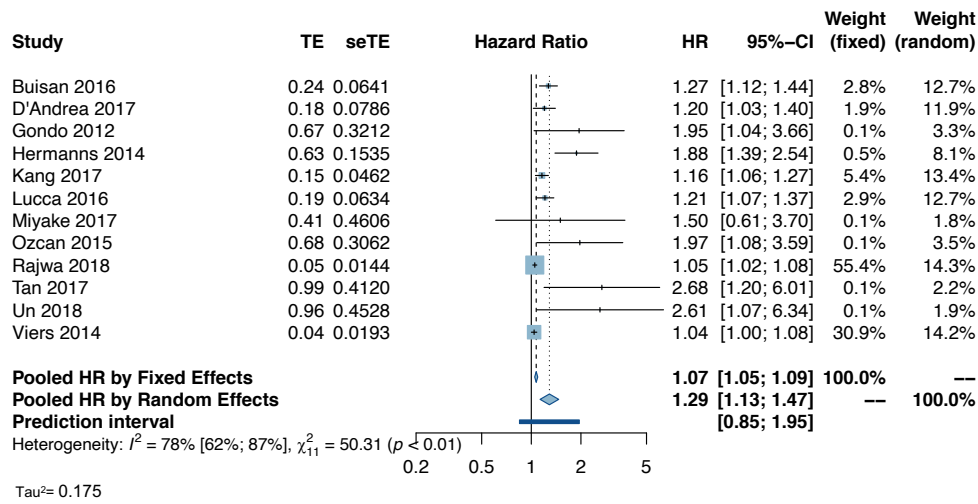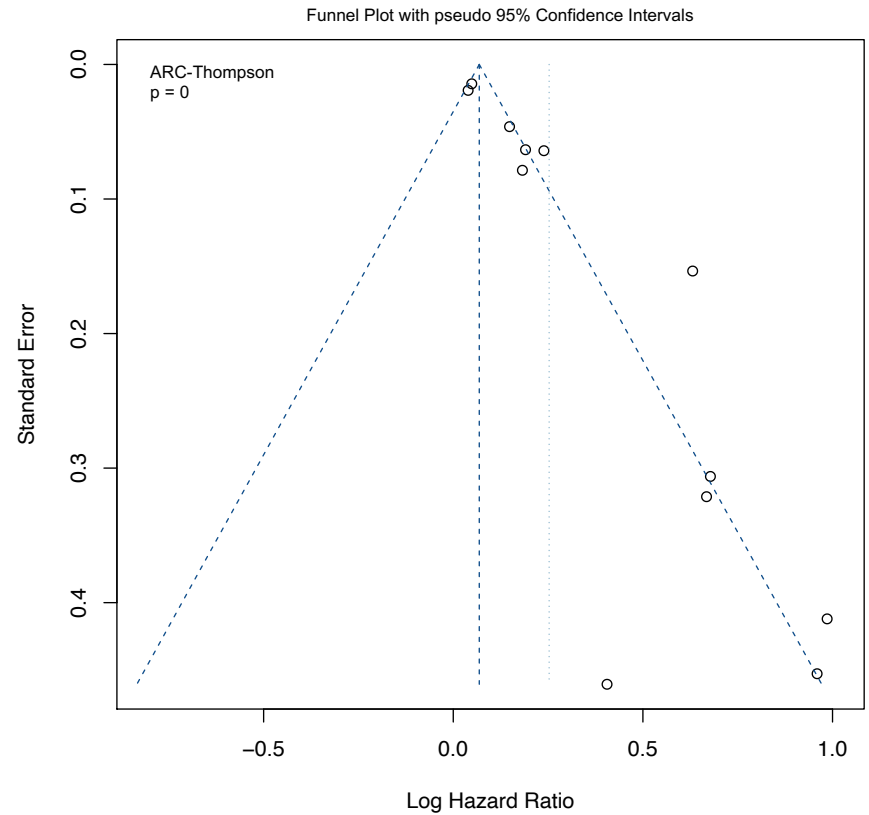

Supplementary Figure 180 - NLR: DFS in Urothelial

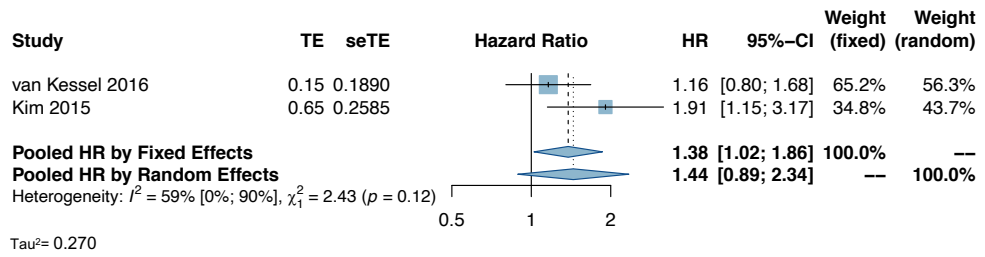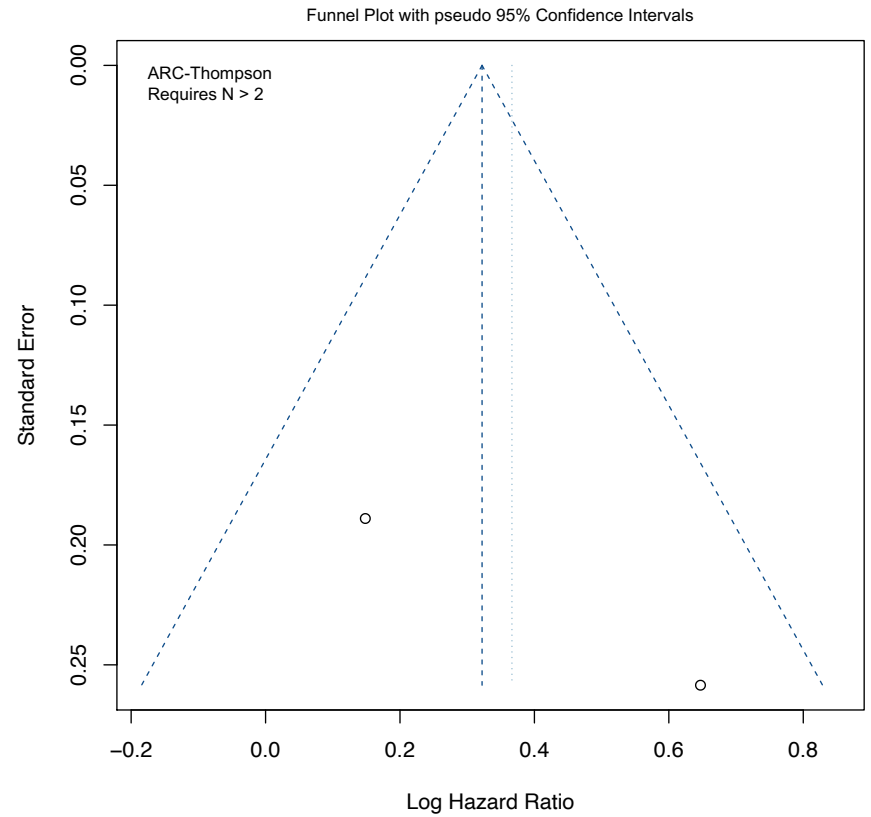

Supplementary Figure 181 - NLR: CSS in Urothelial (Radical Cystectomy)

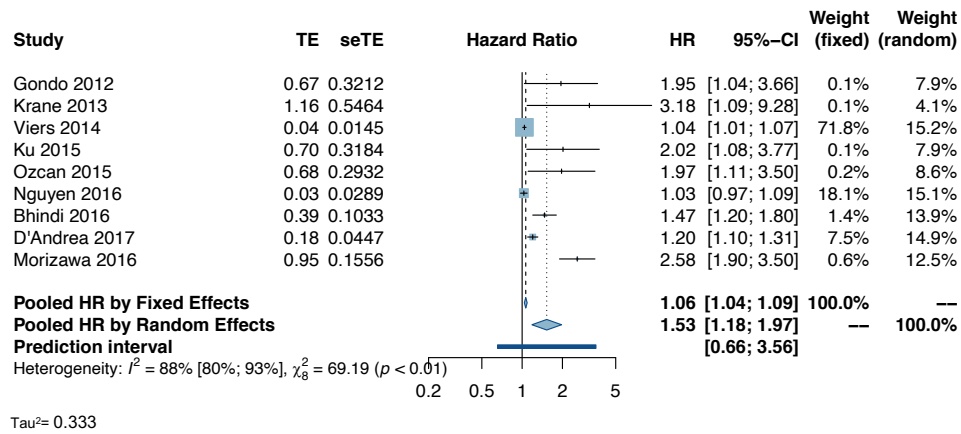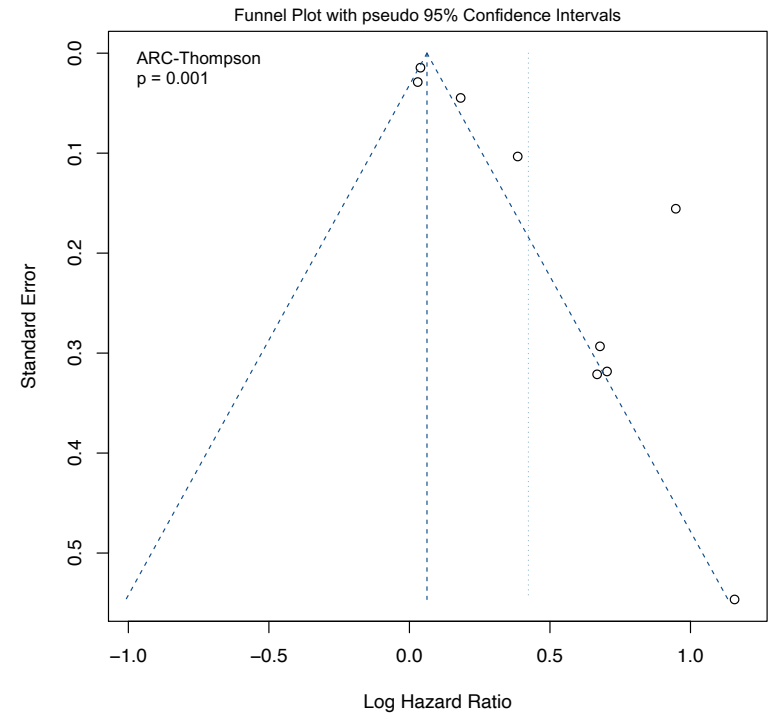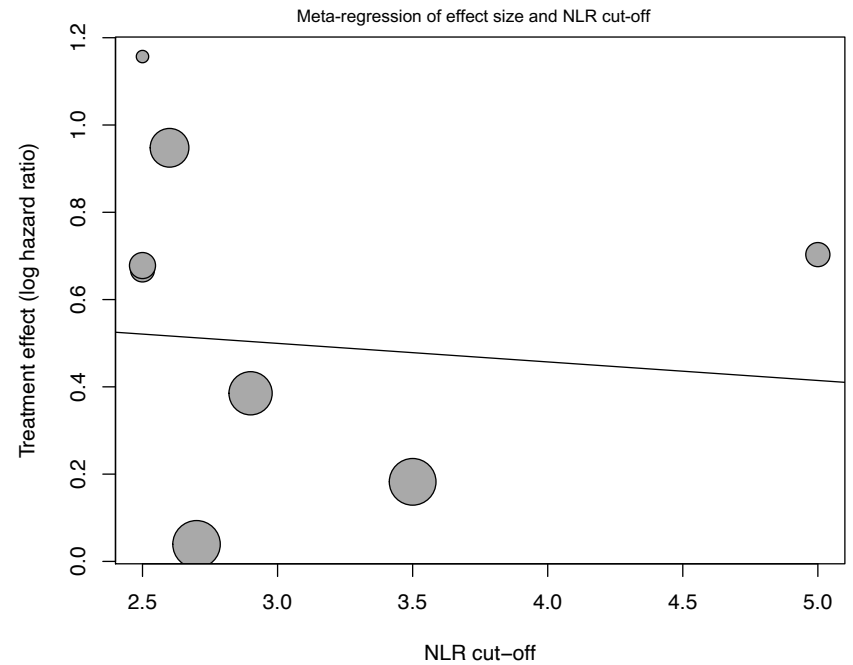

**Supplementary Figure 182 - NLR: OS in Urothelial (Radical Cystectomy)**

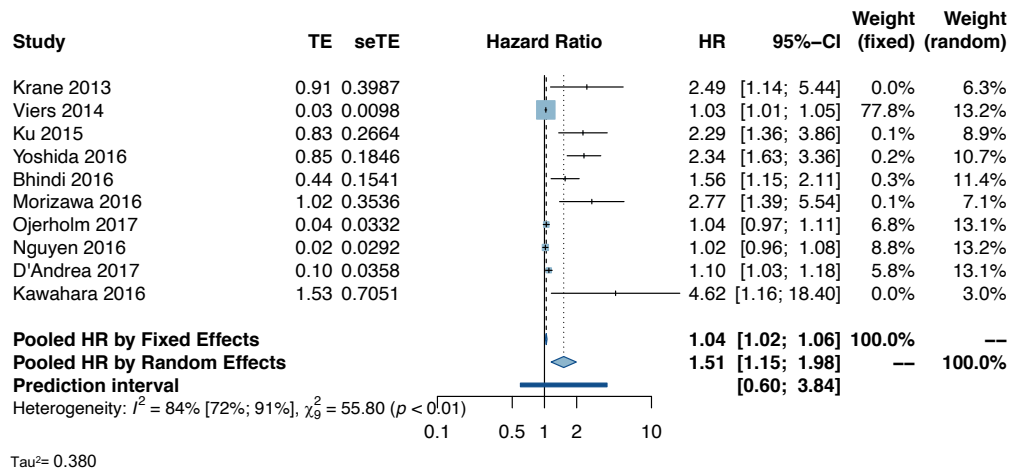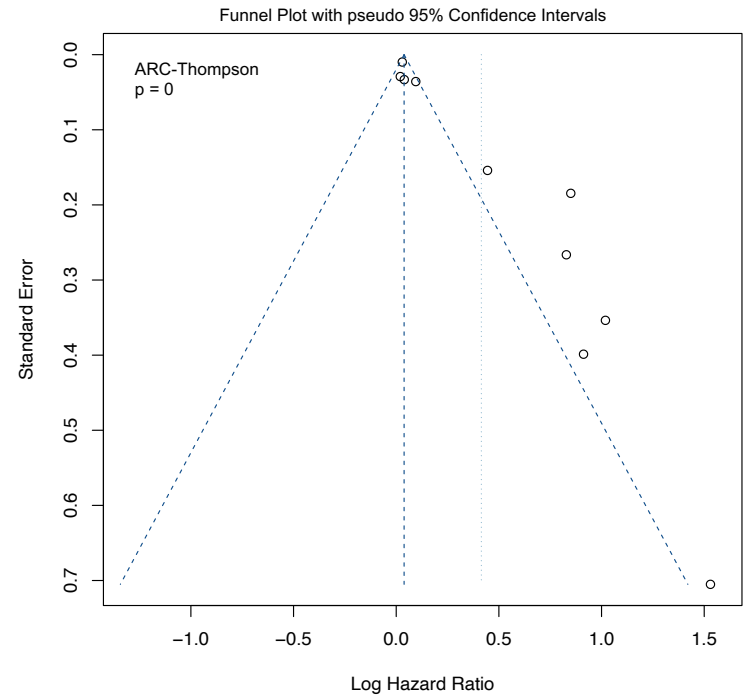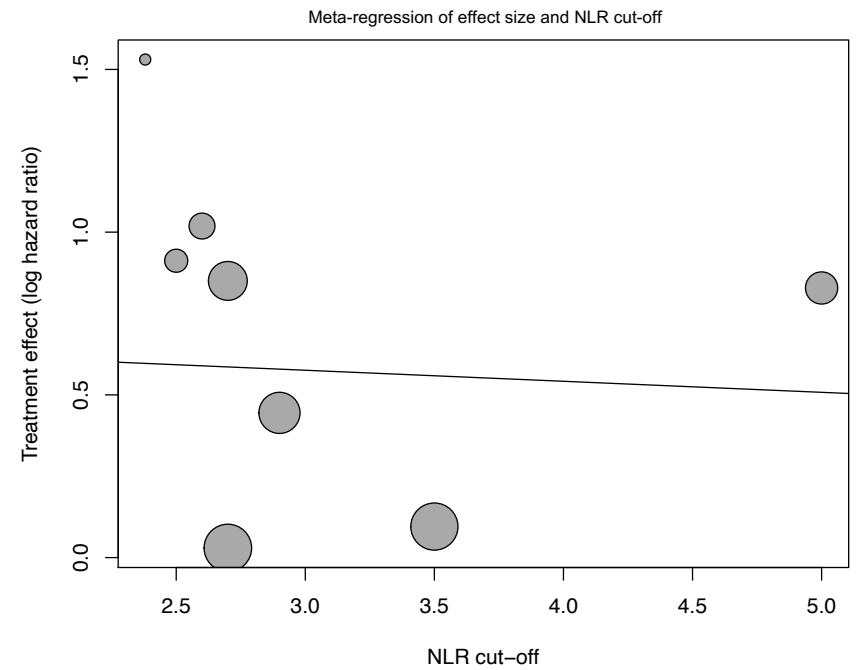

Supplementary Figure 183 - NLR: PFS in Urothelial (Radical Cystectomy)

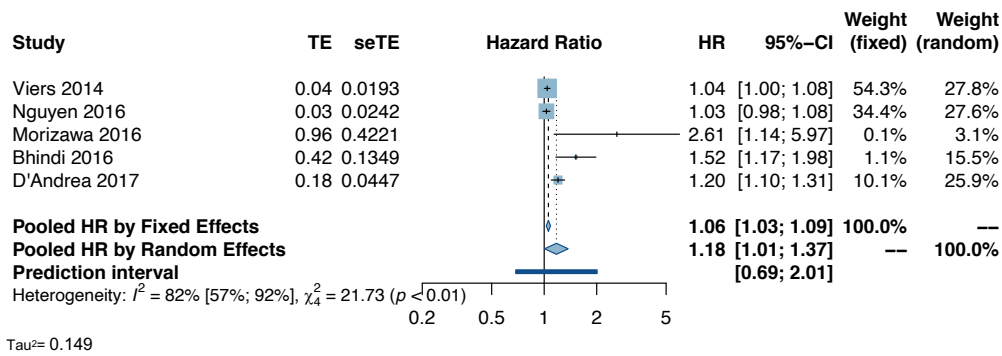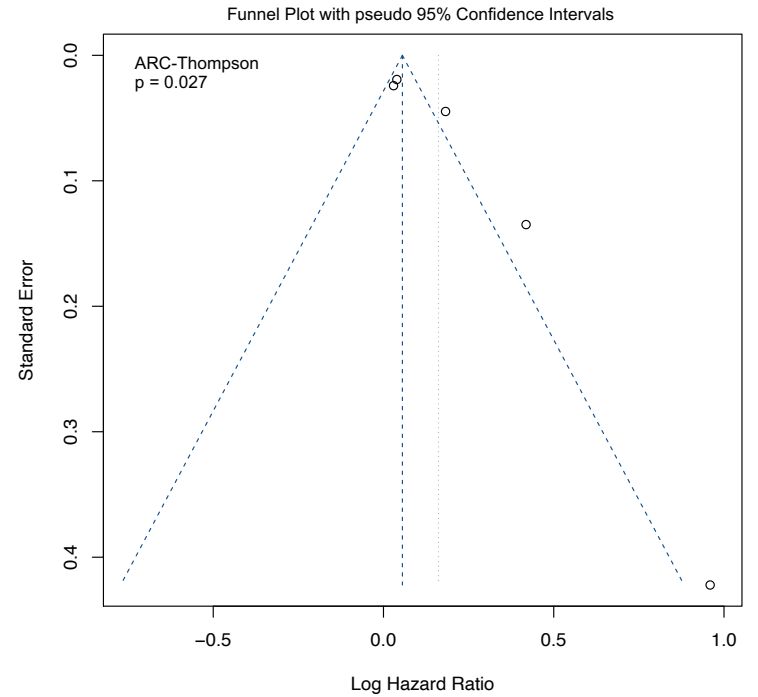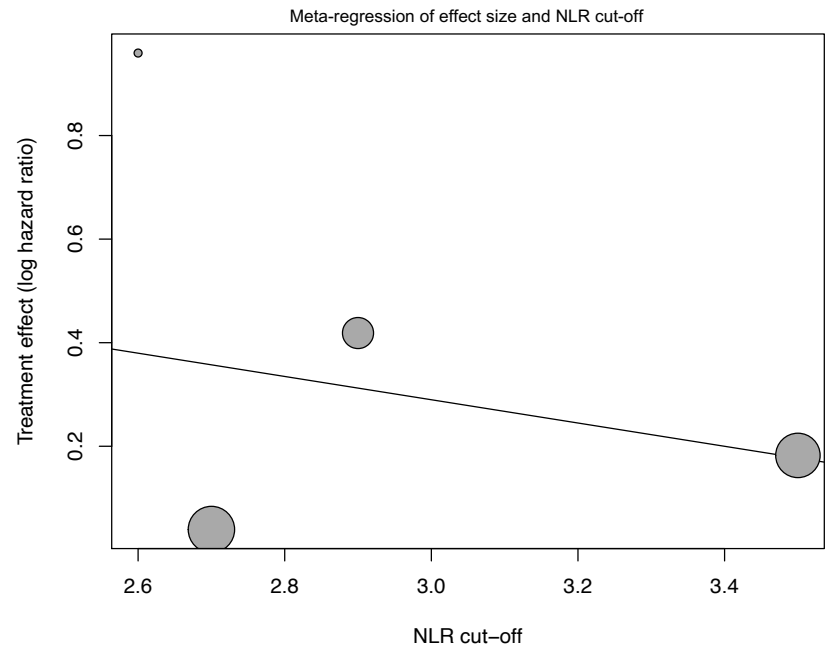



Supplementary Figure 184 - NLR: OS in Urothelial (Chemotherapy)

| Study                              | TE   | seTE   | Hazard Ratio | HR          | 95%-CI              | Weight (fixed) | Weight (random) |
|------------------------------------|------|--------|--------------|-------------|---------------------|----------------|-----------------|
| Taguchi 2015                       | 0.40 | 0.1942 |              | 1.49        | [1.02; 2.18]        | 5.5%           | 9.6%            |
| Rossi 2015                         | 0.55 | 0.1401 |              | 1.74        | [1.32; 2.29]        | 10.6%          | 15.9%           |
| Sonpavde 2016                      | 0.38 | 0.1152 |              | 1.46        | [1.16; 1.83]        | 15.7%          | 20.6%           |
| Auvray 2016                        | 0.25 | 0.0601 |              | 1.28        | [1.14; 1.44]        | 57.6%          | 37.9%           |
| Su 2017                            | 0.46 | 0.1395 |              | 1.59        | [1.21; 2.09]        | 10.7%          | 16.0%           |
| <b>Pooled HR by Fixed Effects</b>  |      |        |              | <b>1.39</b> | <b>[1.27; 1.52]</b> | <b>100.0%</b>  | <b>—</b>        |
| <b>Pooled HR by Random Effects</b> |      |        |              | <b>1.45</b> | <b>[1.27; 1.65]</b> | <b>—</b>       | <b>100.0%</b>   |
| <b>Prediction interval</b>         |      |        |              |             | <b>[1.02; 2.07]</b> |                |                 |

Heterogeneity:  $I^2 = 30\%$  [0%; 73%],  $\chi^2_4 = 5.69$  ( $p = 0.22$ )

Tau<sup>2</sup> = 0.089

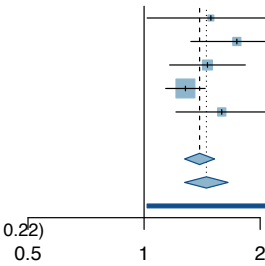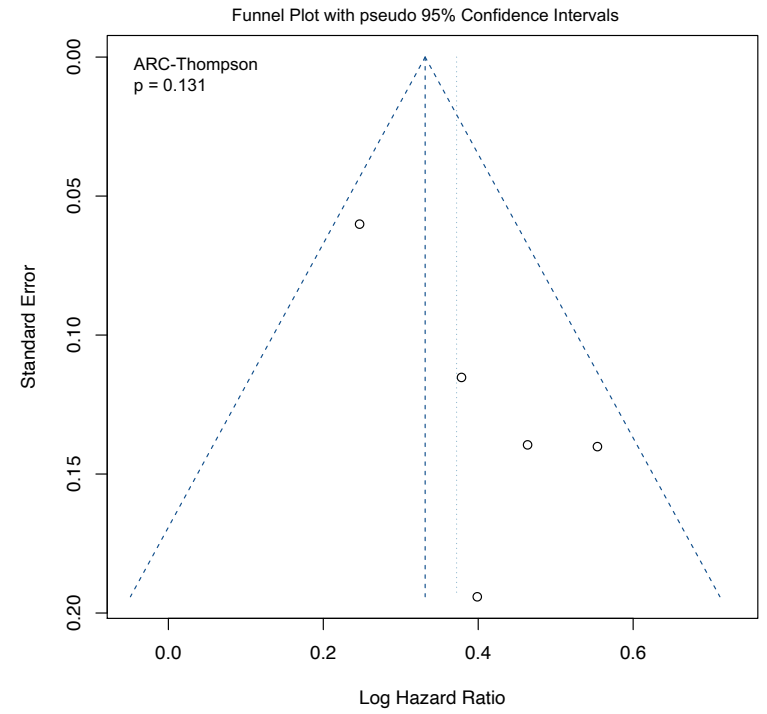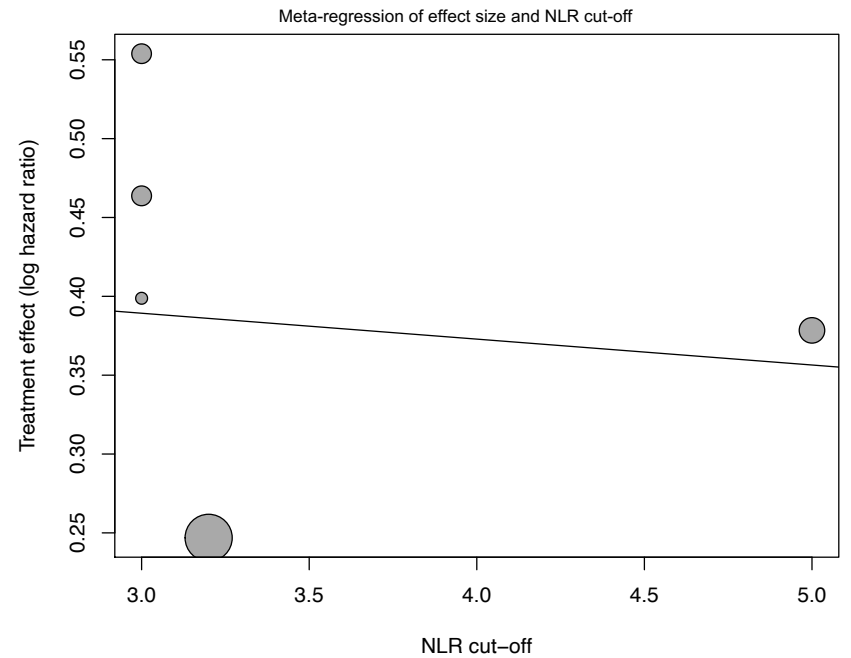

**Supplementary Figure 185 - NLR: PFS in Urothelial (Chemotherapy)**

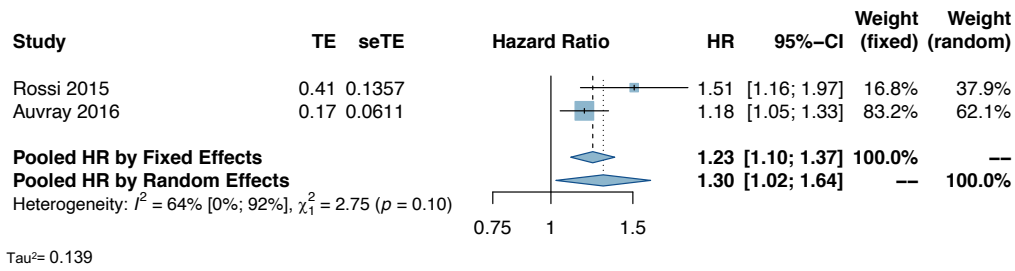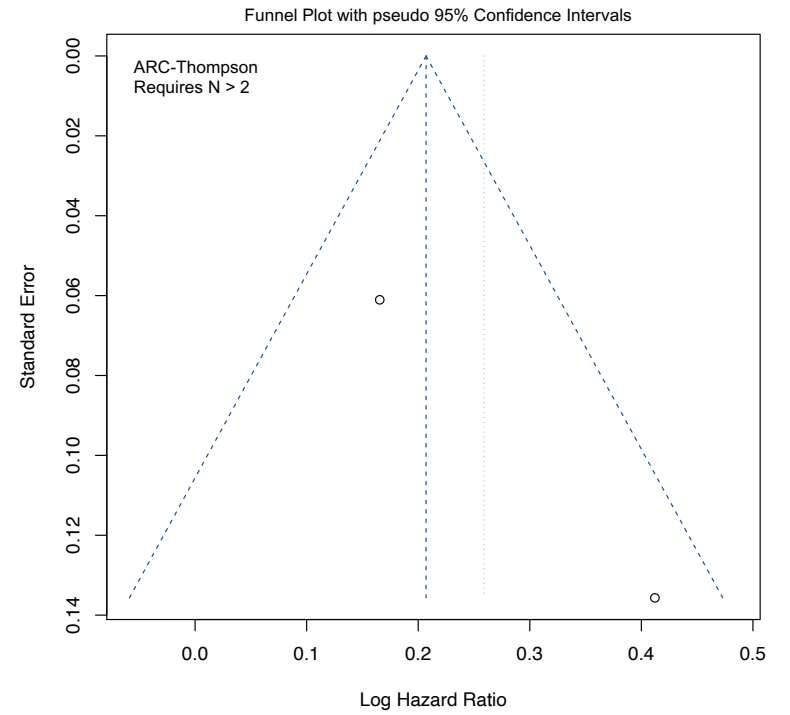

**Supplementary Figure 186 - NLR: OS in Urothelial (Nephroureterectomy)**

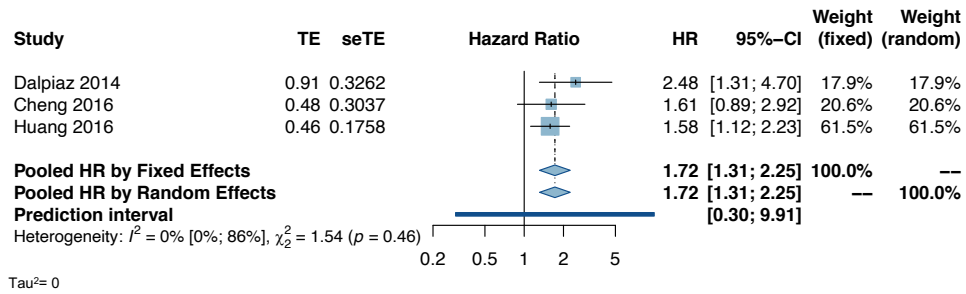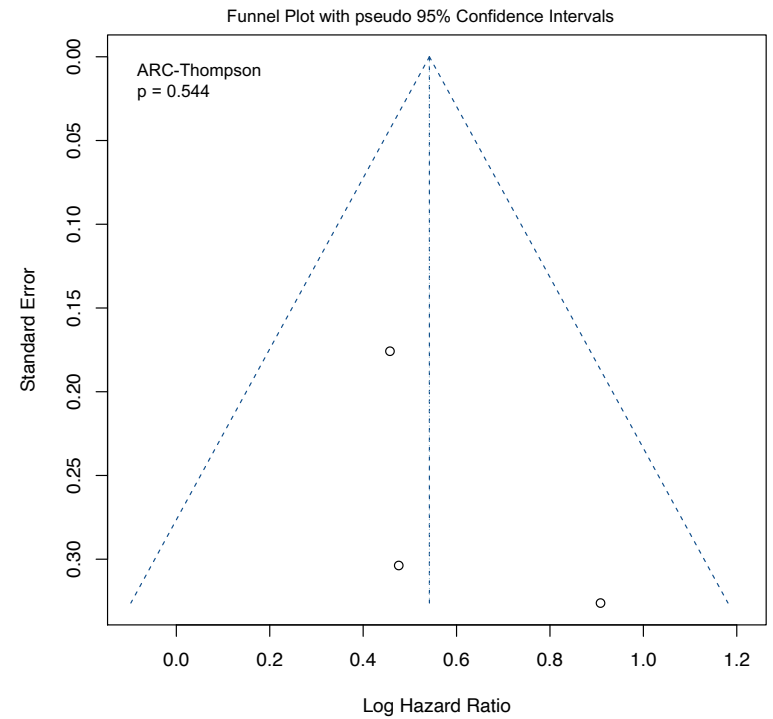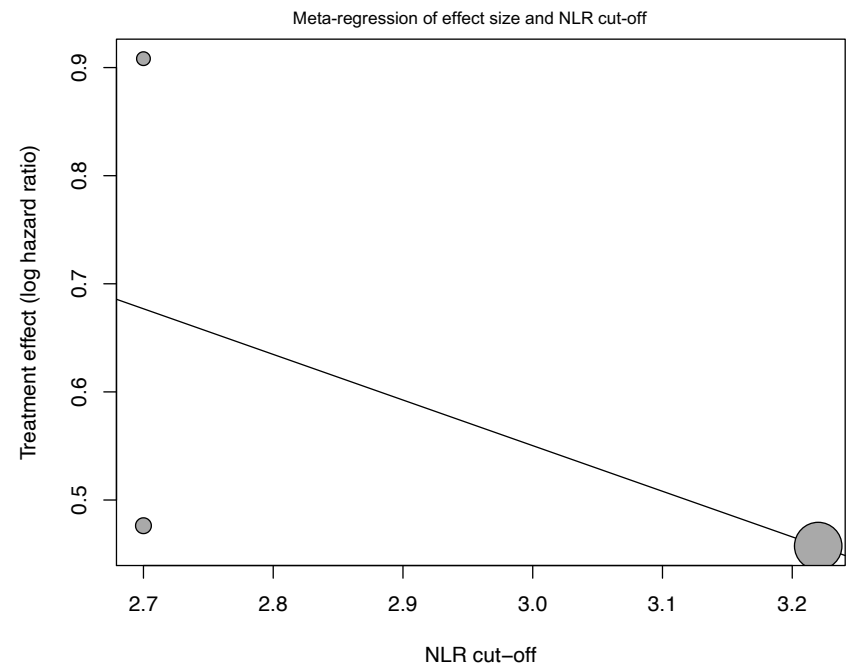

**Supplementary Figure 187 - NLR: PFS in Urothelial (Nephroureterectomy)**

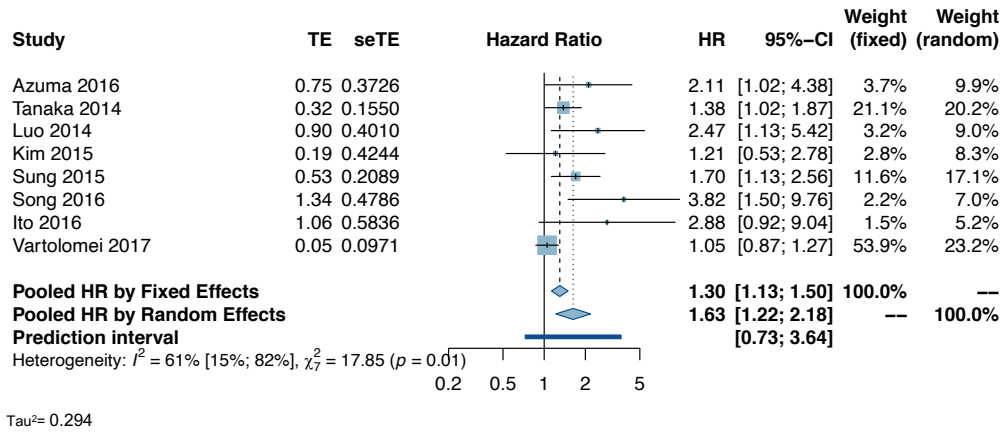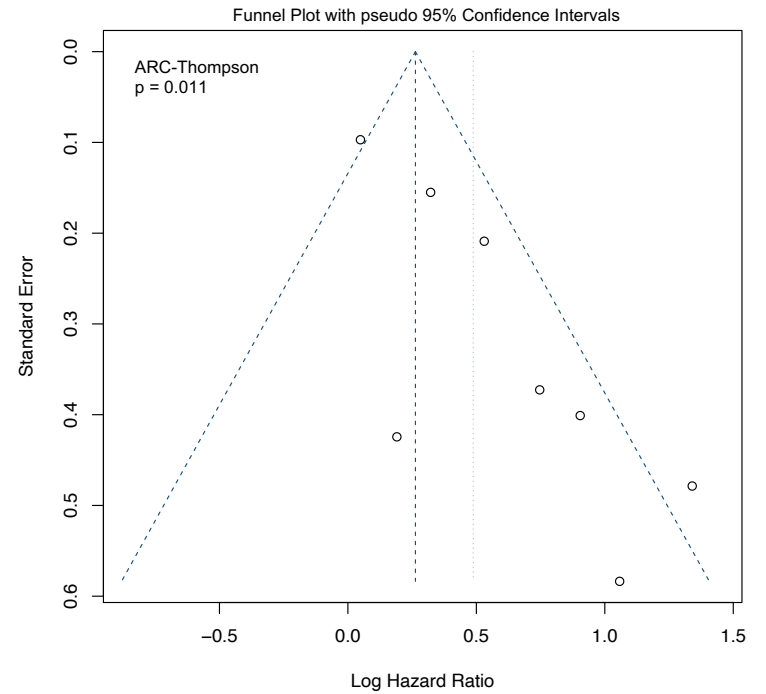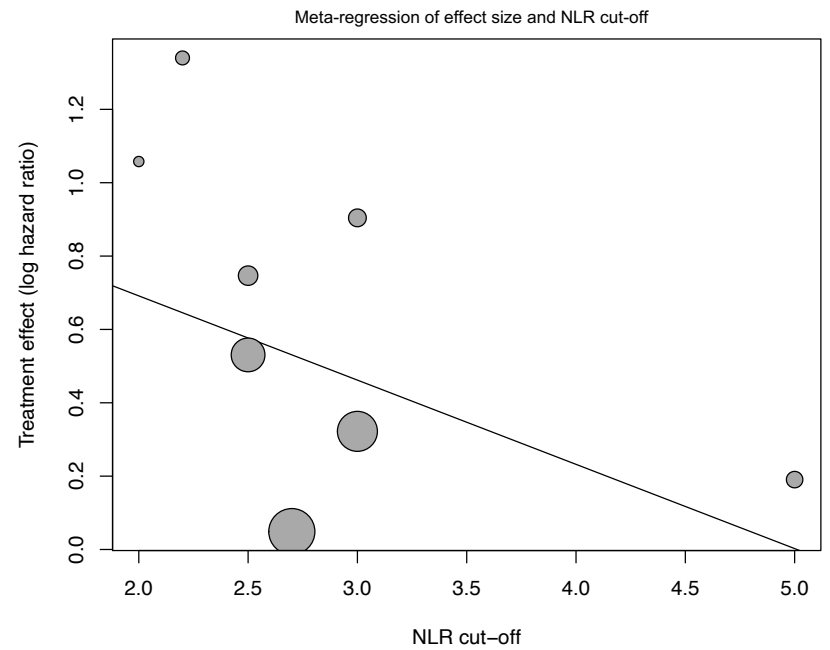

Supplementary Figure 188 - NLR: PFS in Bladder (UTR)

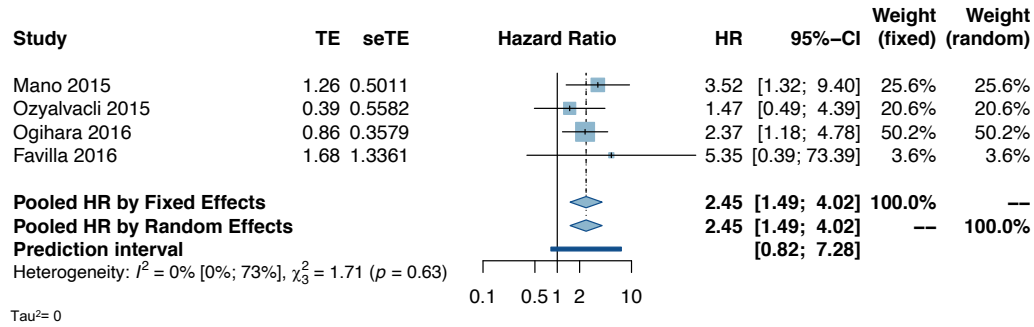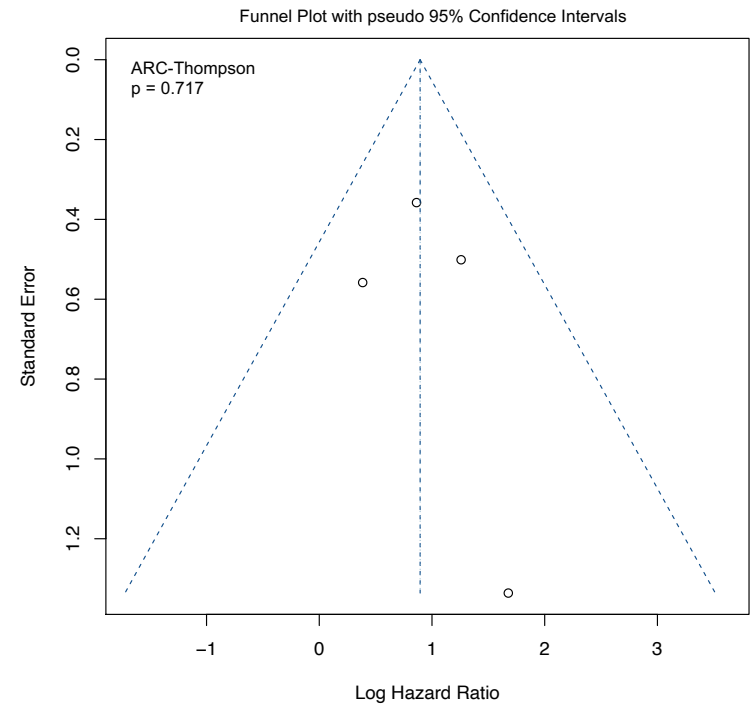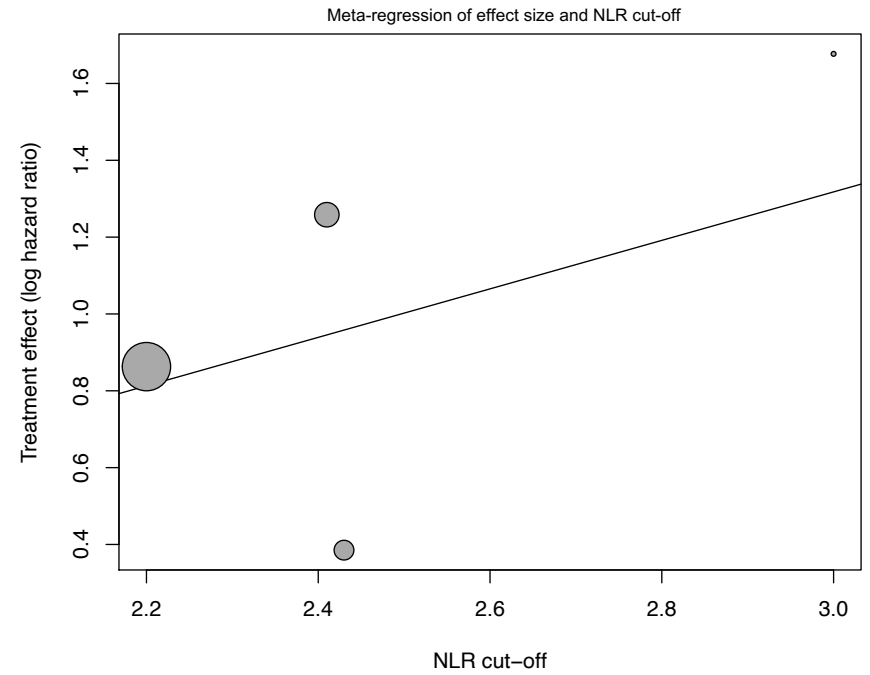

**Supplementary Figure 189 - NLR: RFS in Bladder (UTR)**

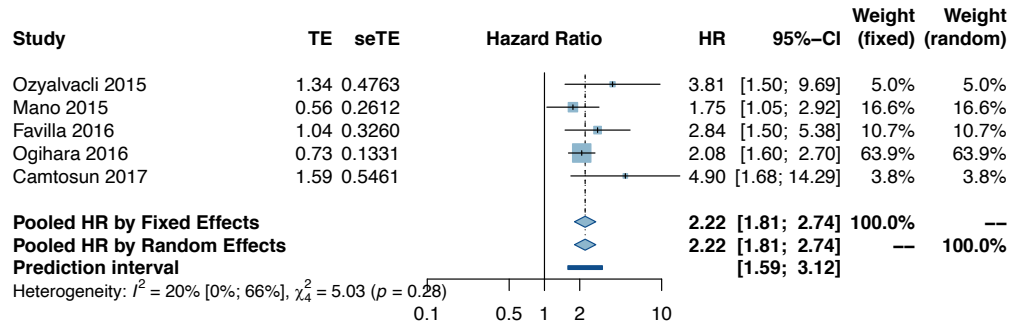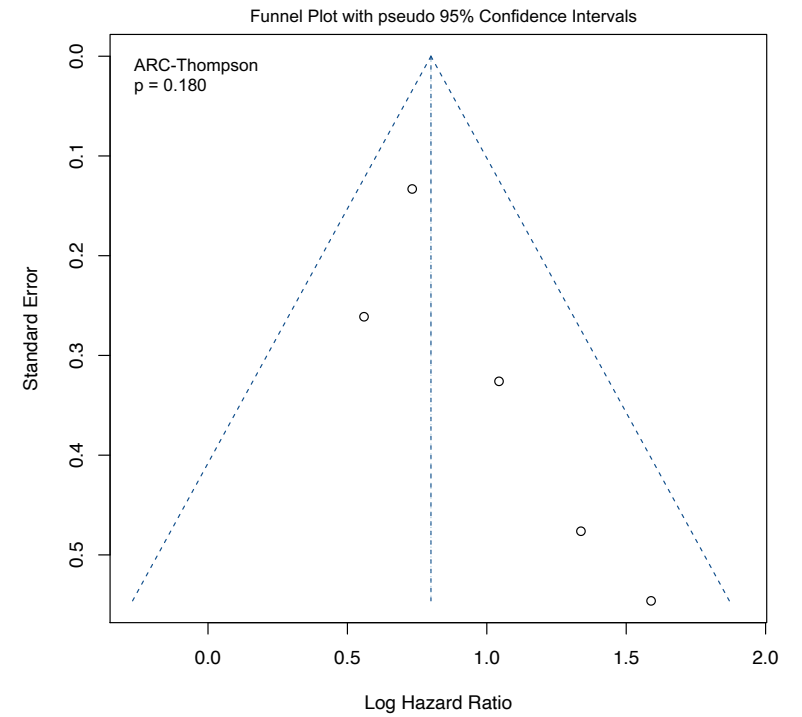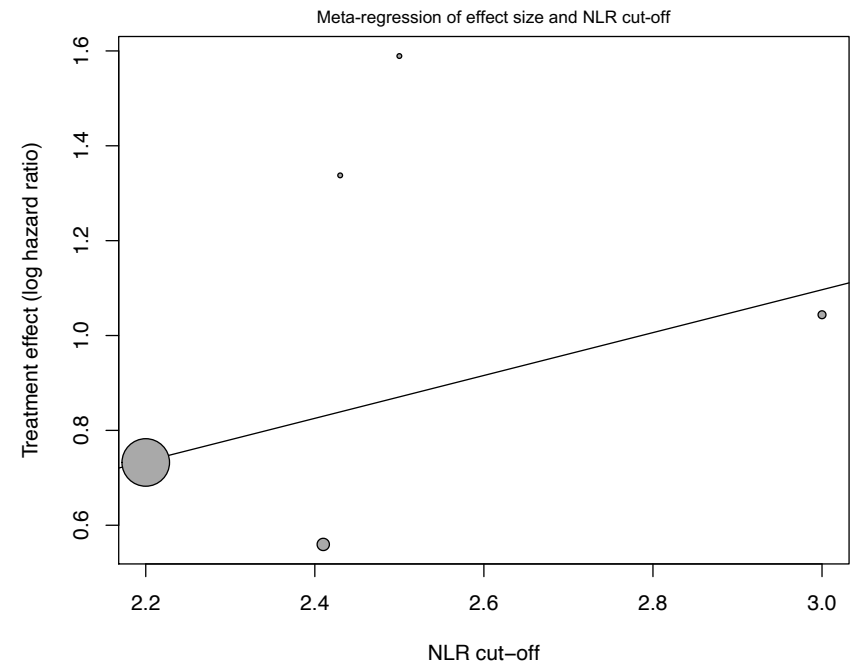

### Supplementary Figure 190 - NLR: OS in Bladder

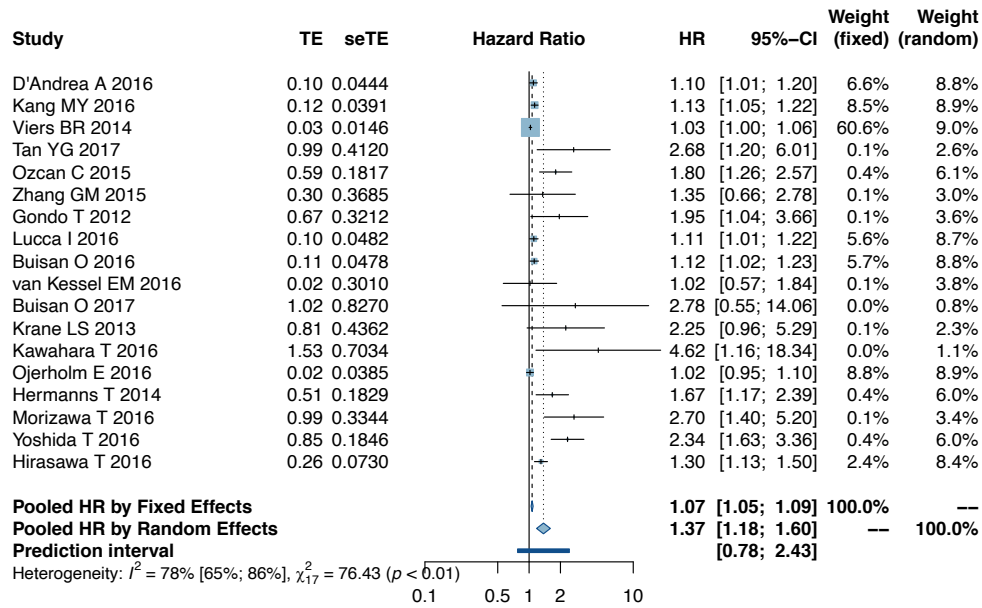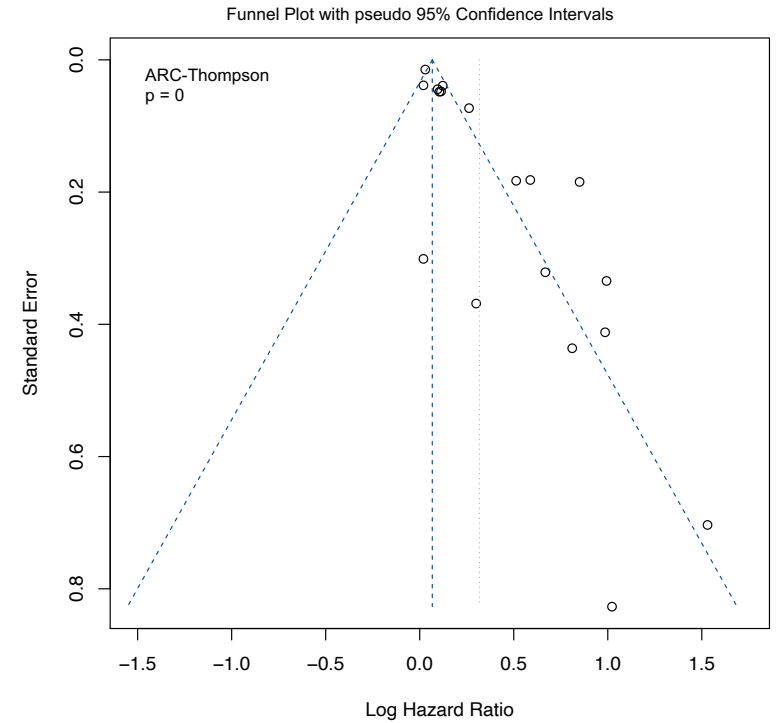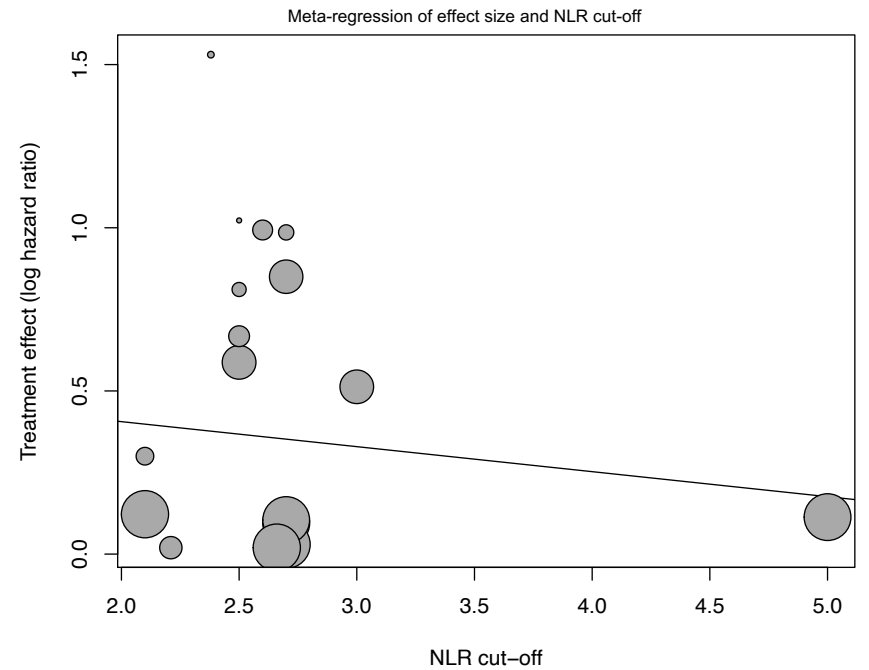

Supplementary Figure 191 - NLR: OS in Bladder (Radical Cystectomy)

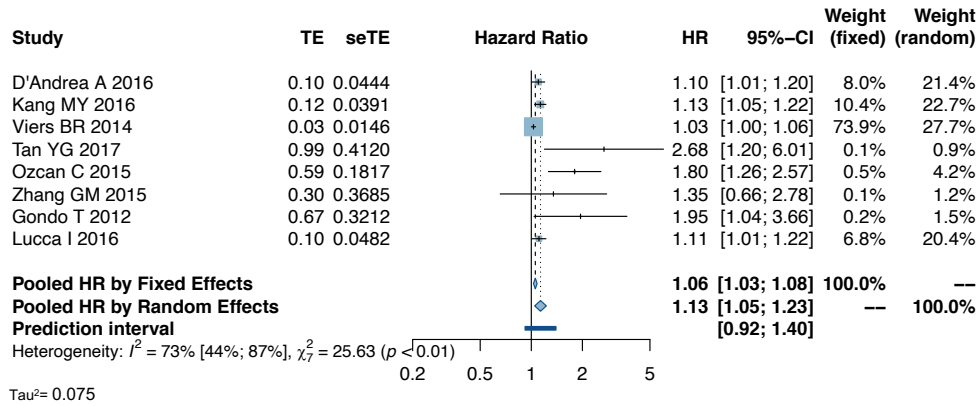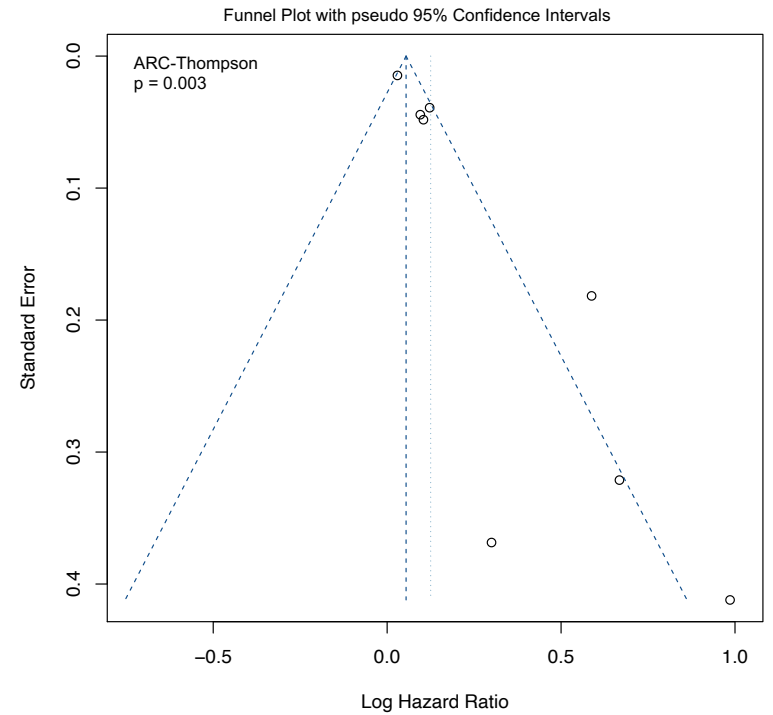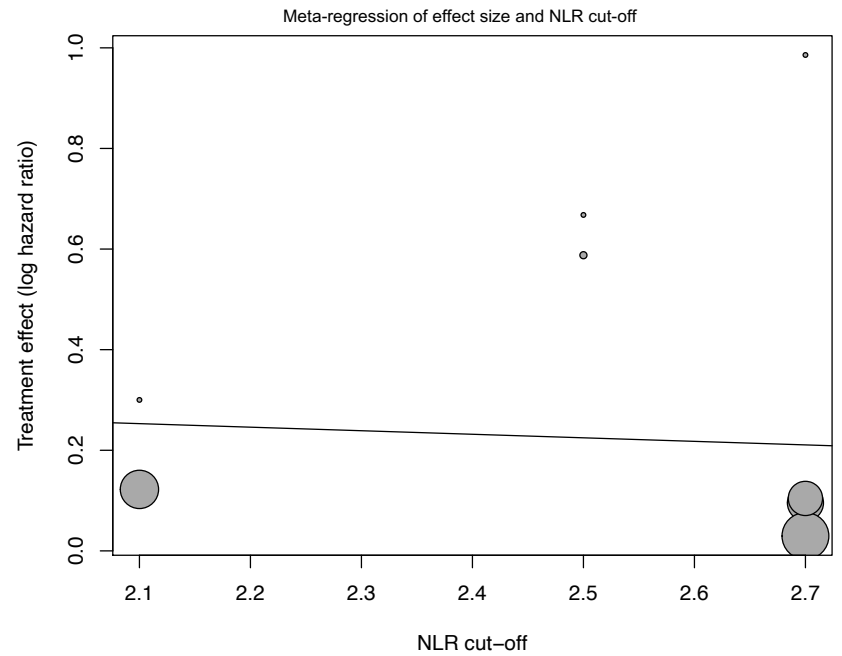



Supplementary Figure 192 - NLR: OS in Bladder (Radical Cystectomy and NAC)

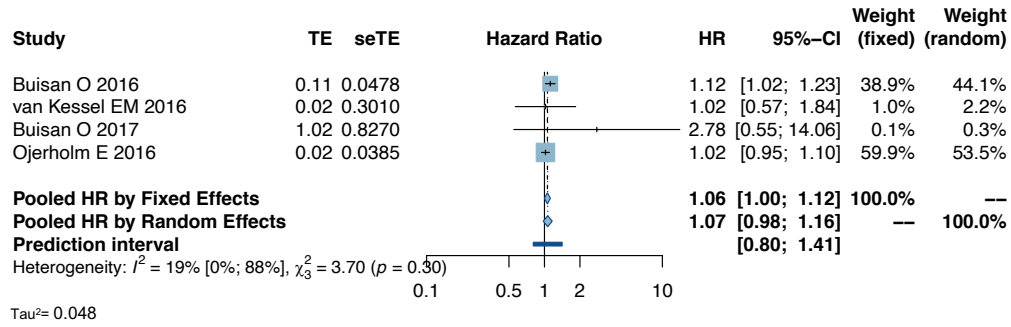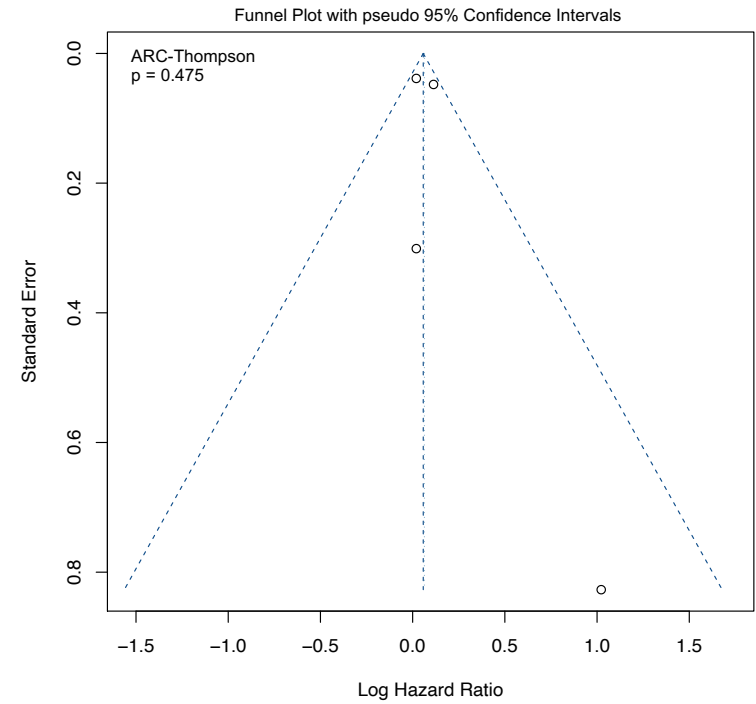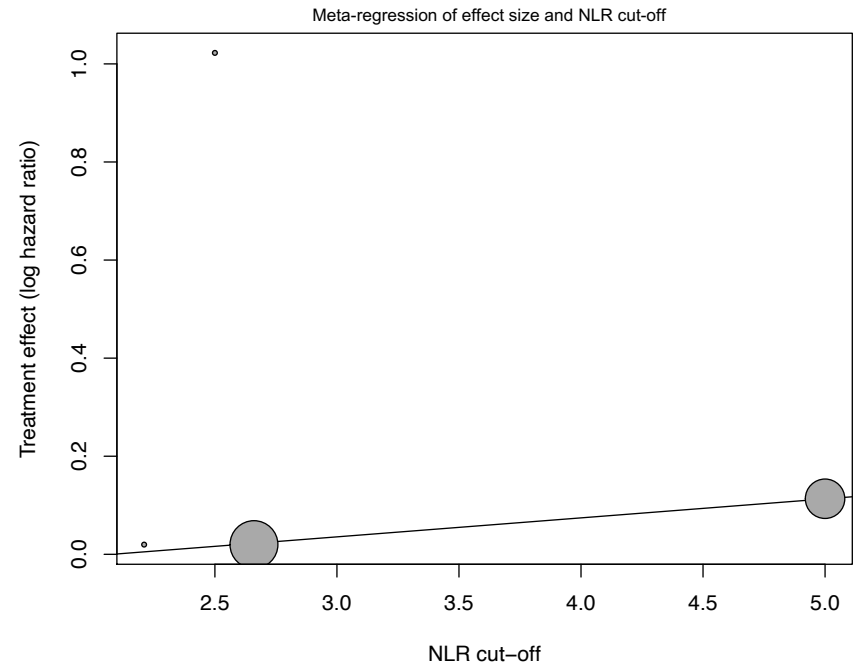

Supplementary Figure 193 - NLR: PFS in Prostate

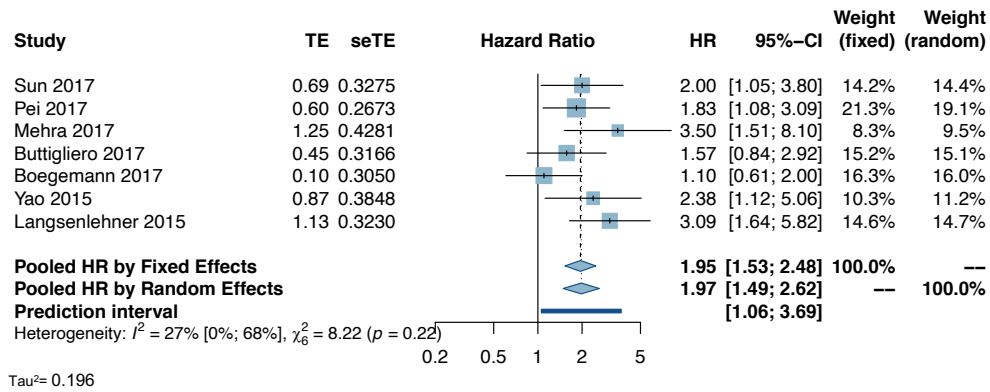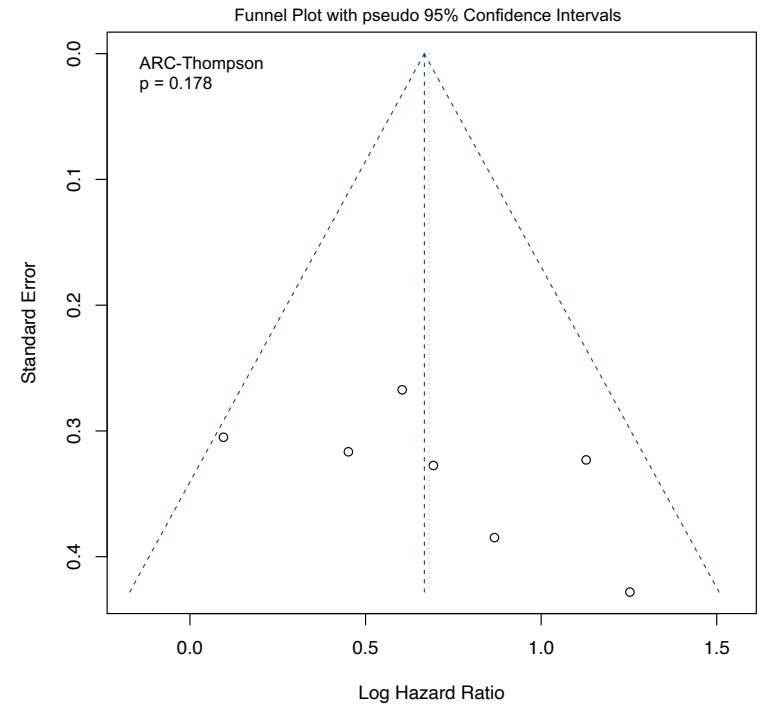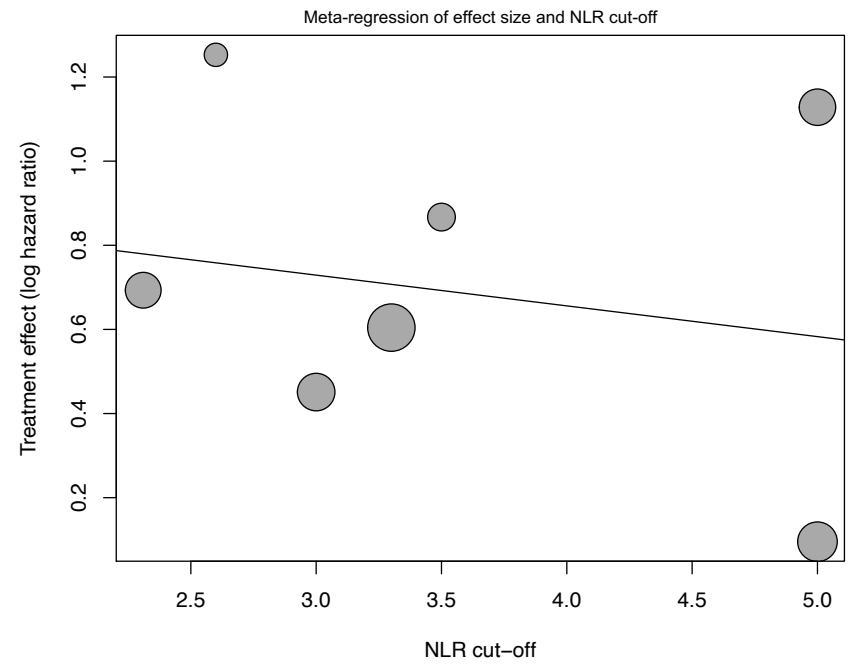

Supplementary Figure 194 - NLR: OS in Prostate CR(Abitaterone)

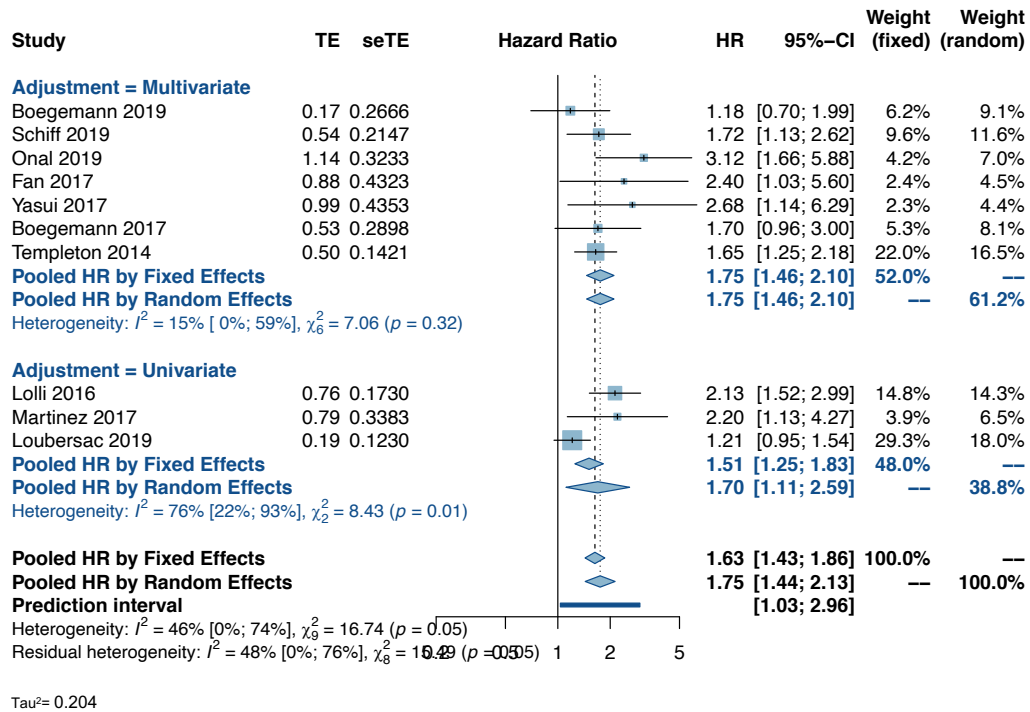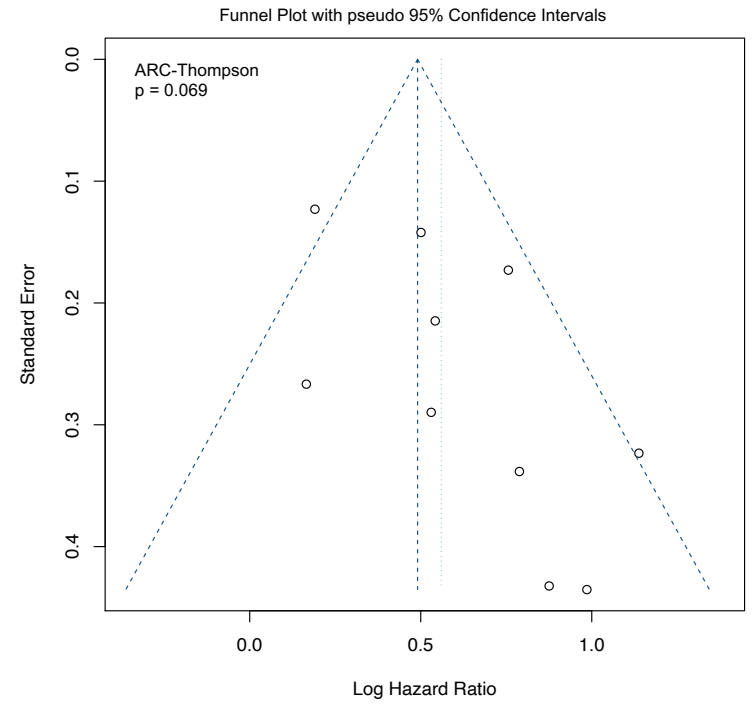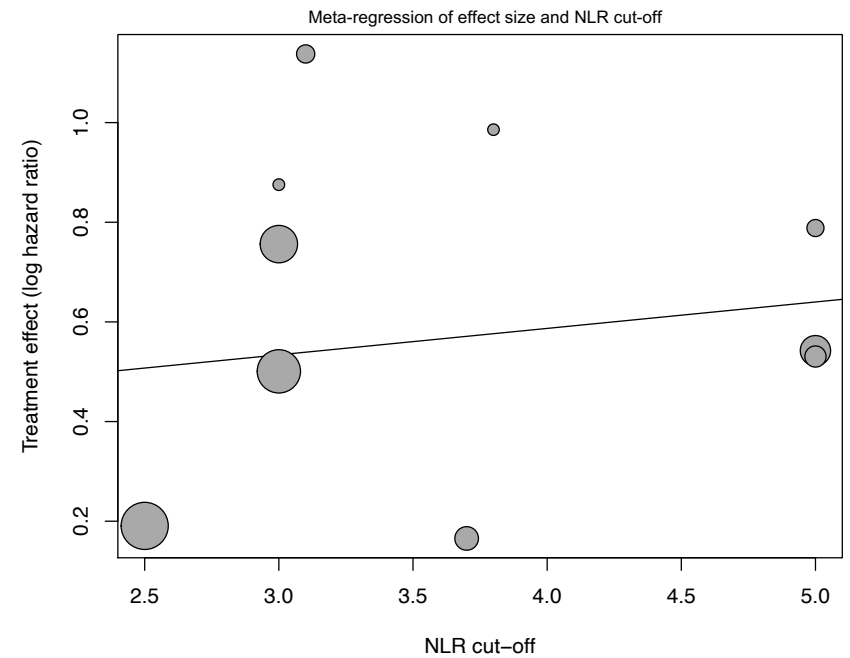

Supplementary Figure 195 - NLR: PFS in Prostate CR (Abitaterone)

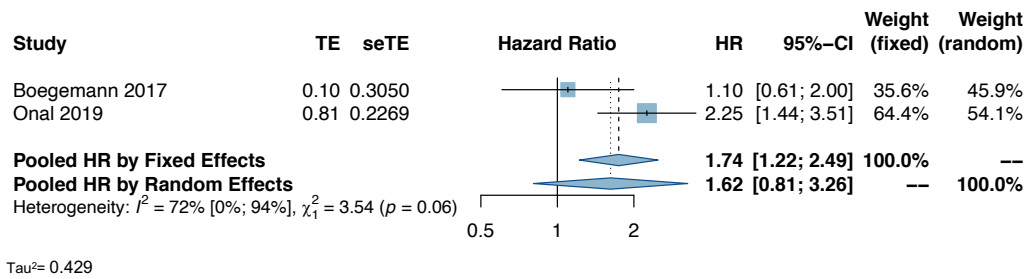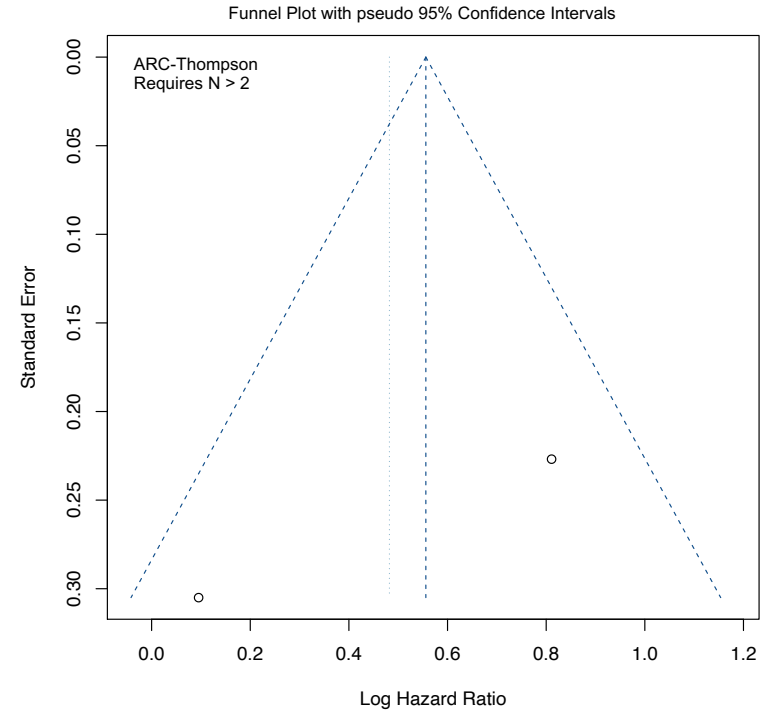

Supplementary Figure 196 - NLR: OS in Prostate CR (Enzalutamide)

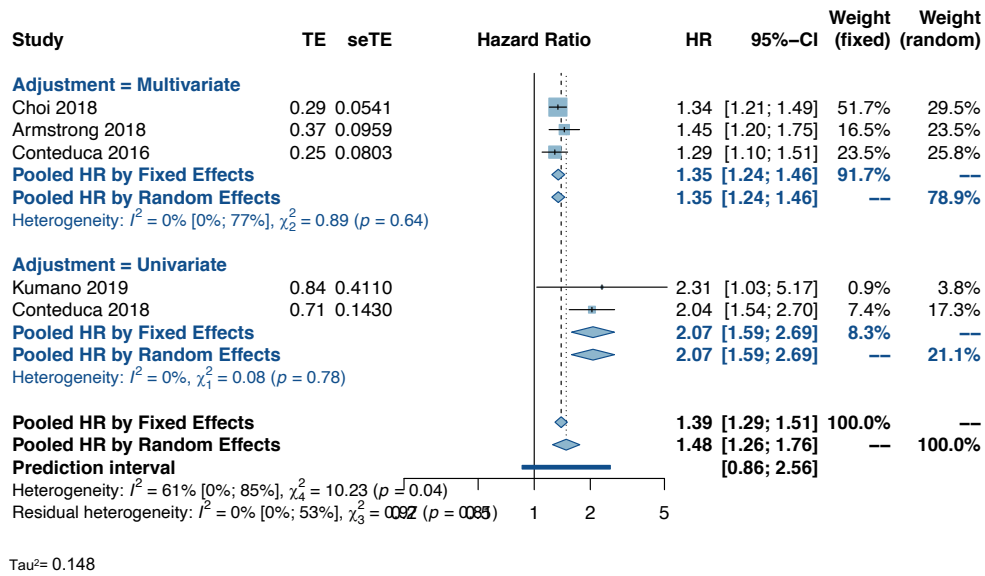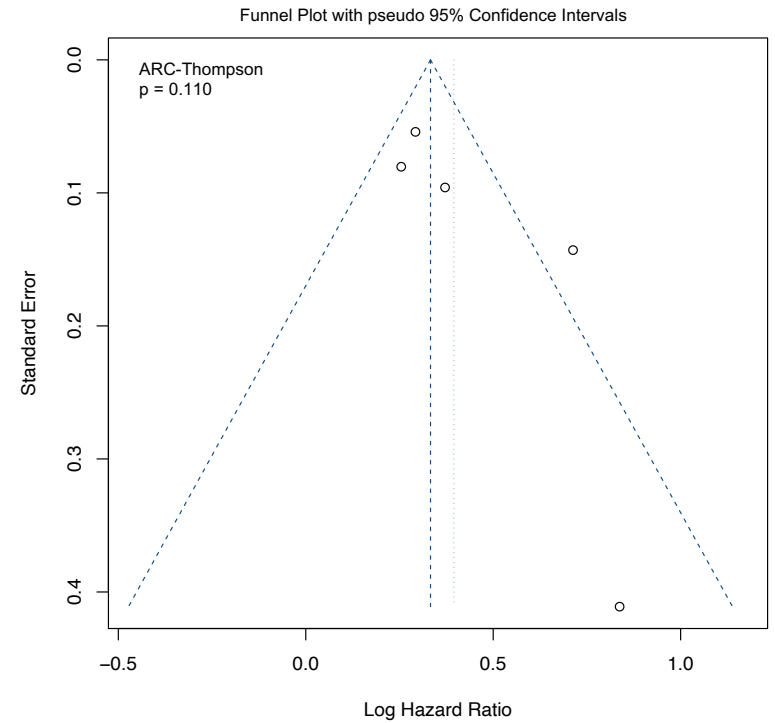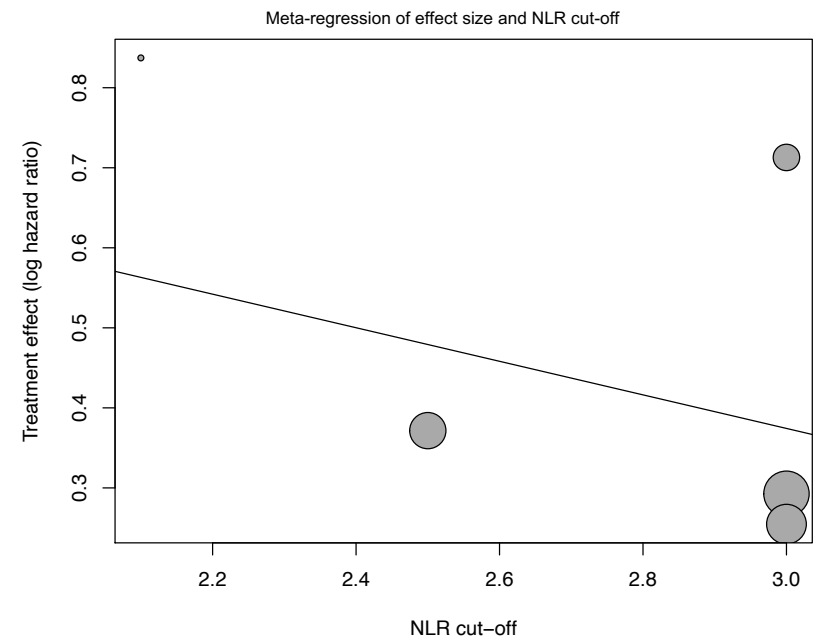

Supplementary Figure 197 - NLR: PFS in Prostate CR (Enzalutamide)

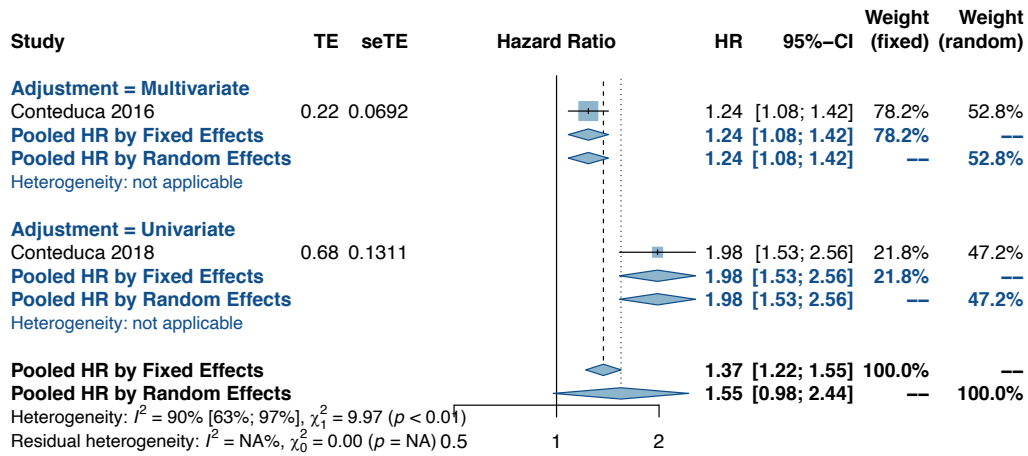

Tau<sup>2</sup>= 0.314

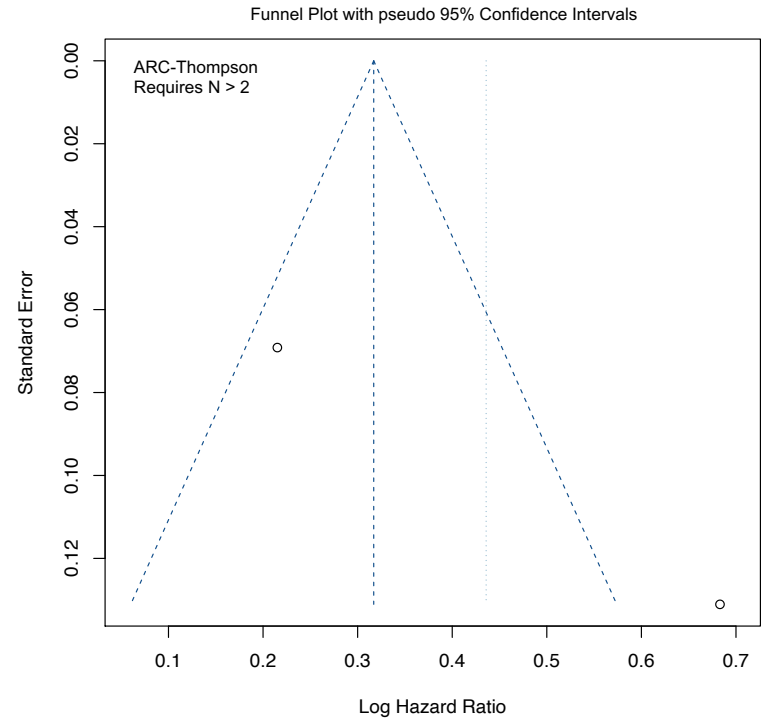

Supplementary Figure 198 - NLR: OS in Prostate (Metastatic)

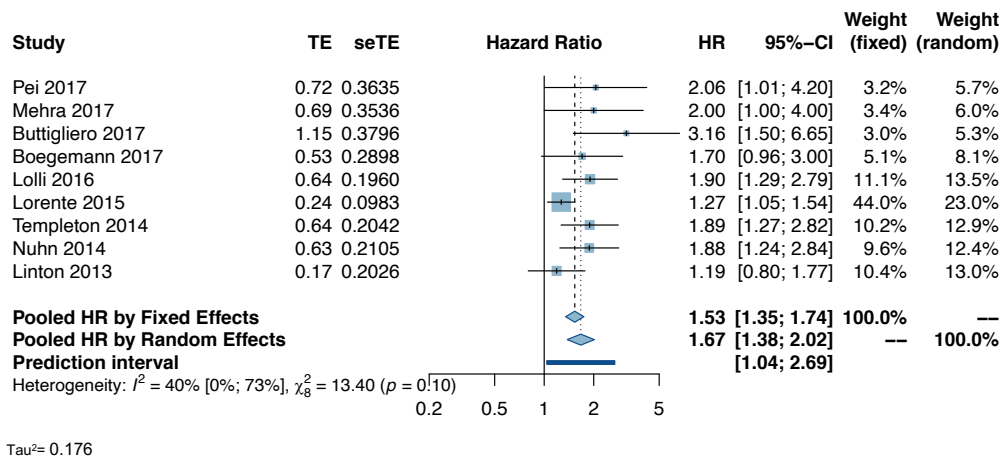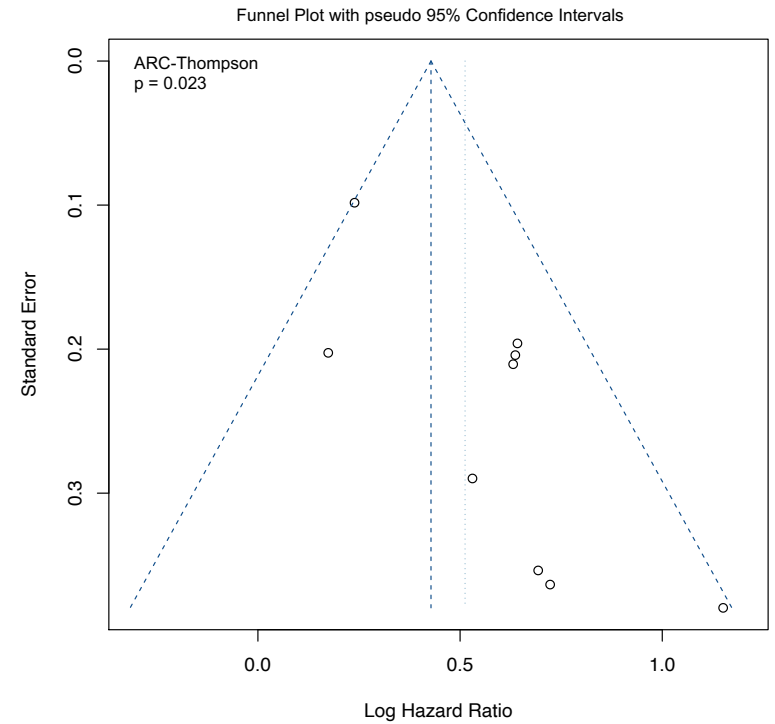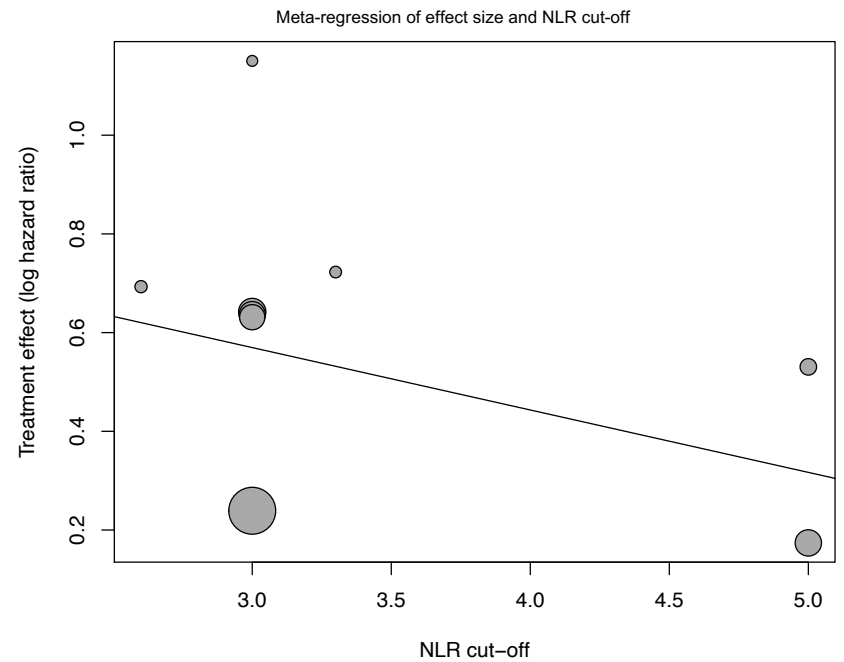

### Supplementary Figure 199 - NLR: DFS in Thyroid

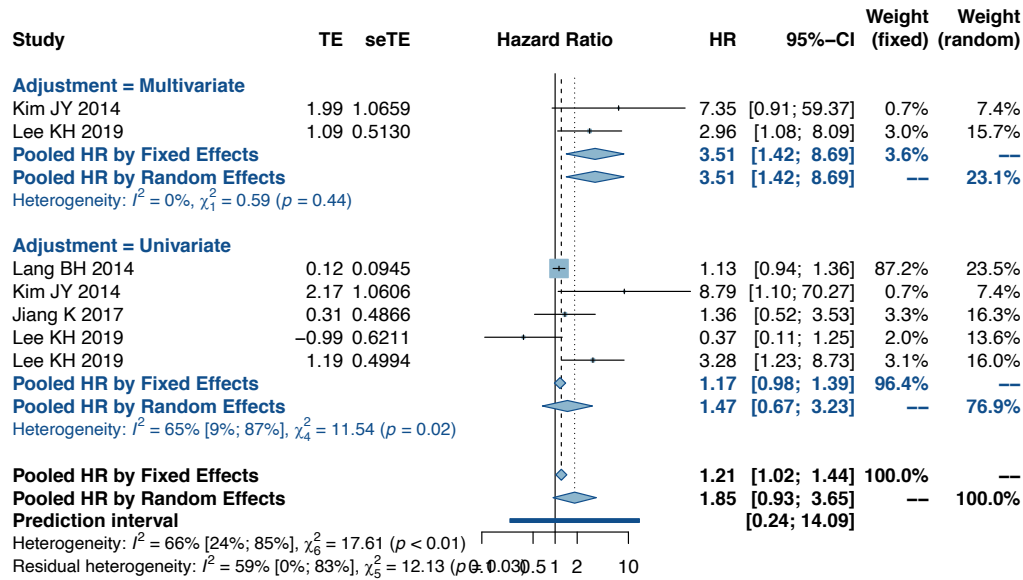

Tau<sup>2</sup> = 0.710

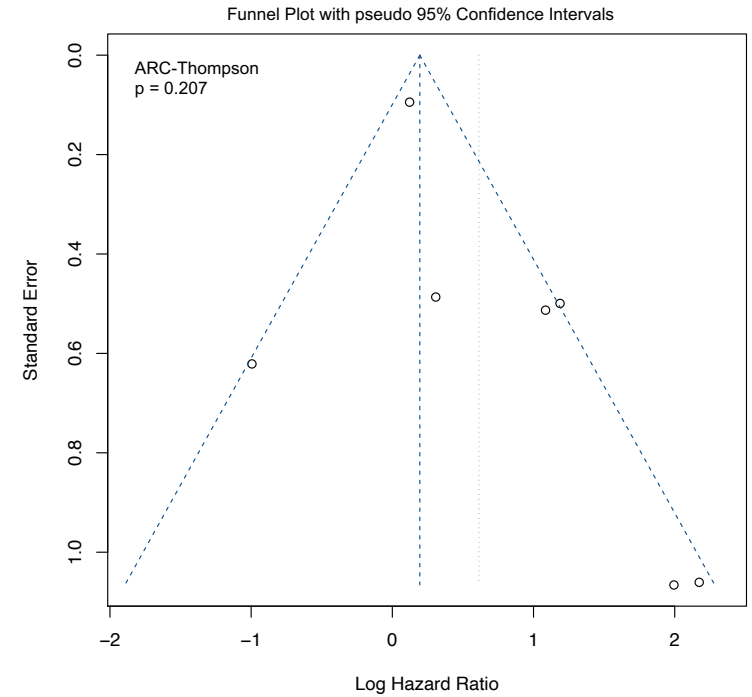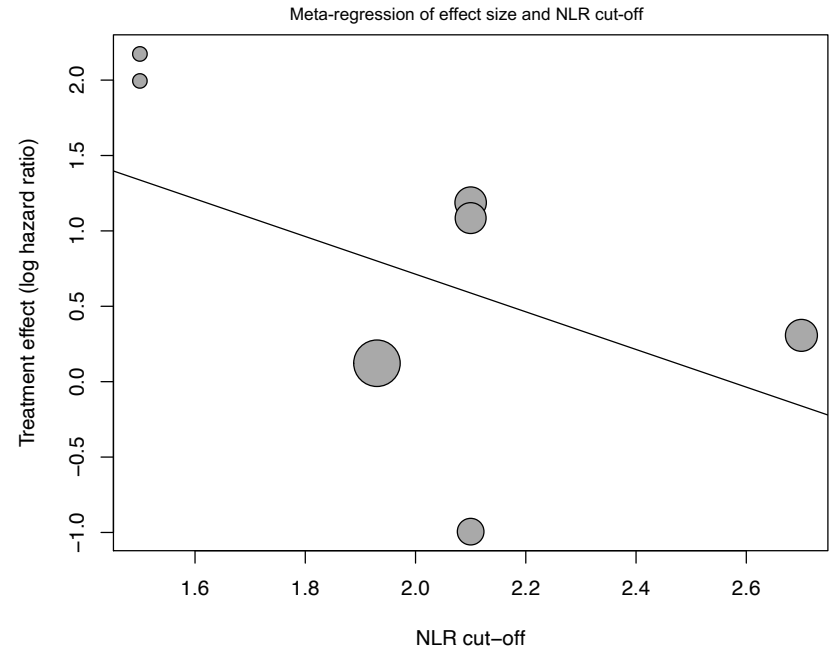



Supplementary Figure 200 - NLR: OS in Ovarian

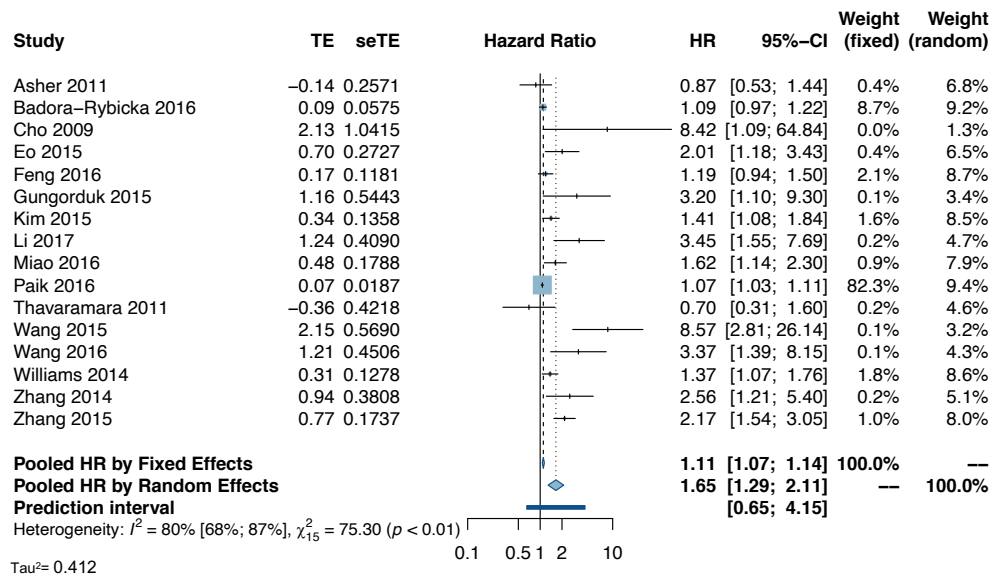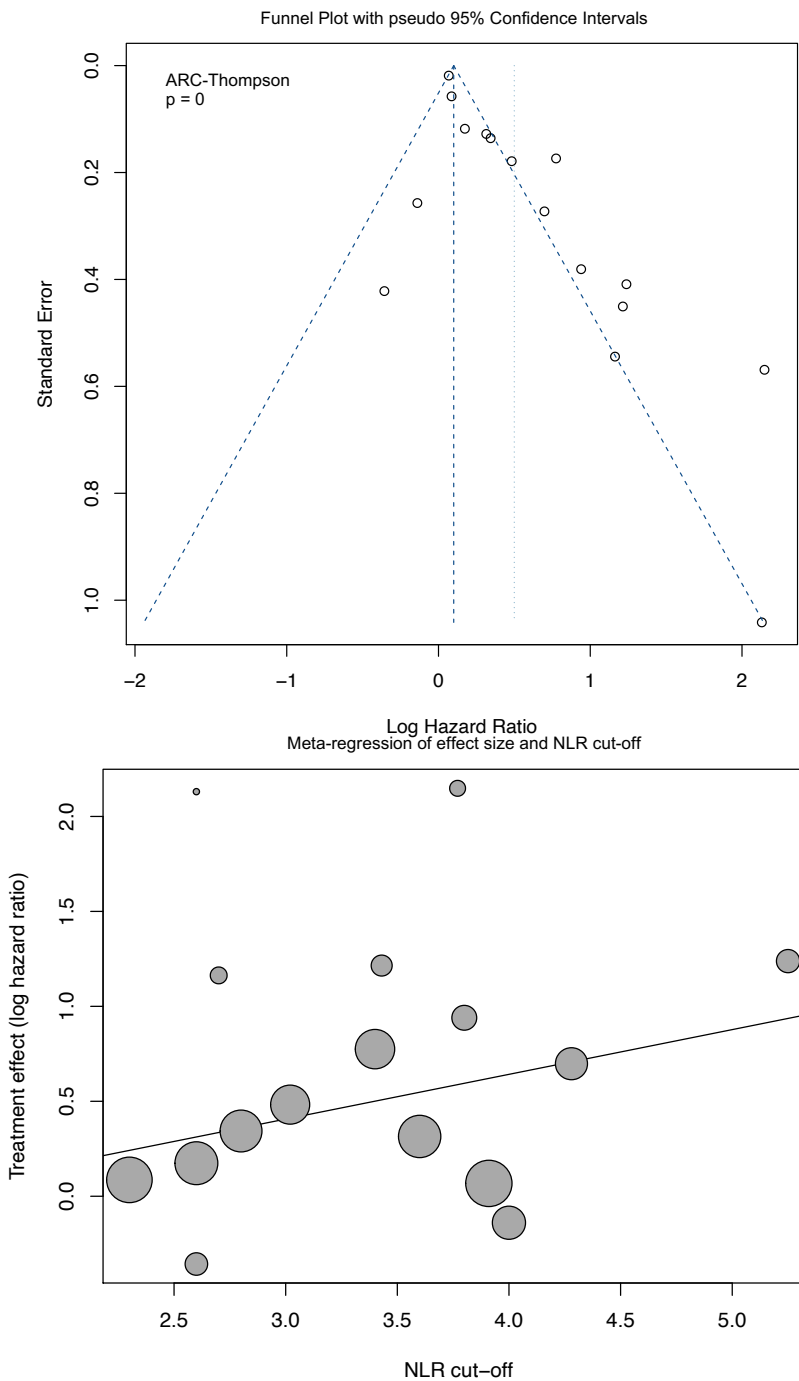

Supplementary Figure 201 - NLR: OS in Hepatocellular (SR)

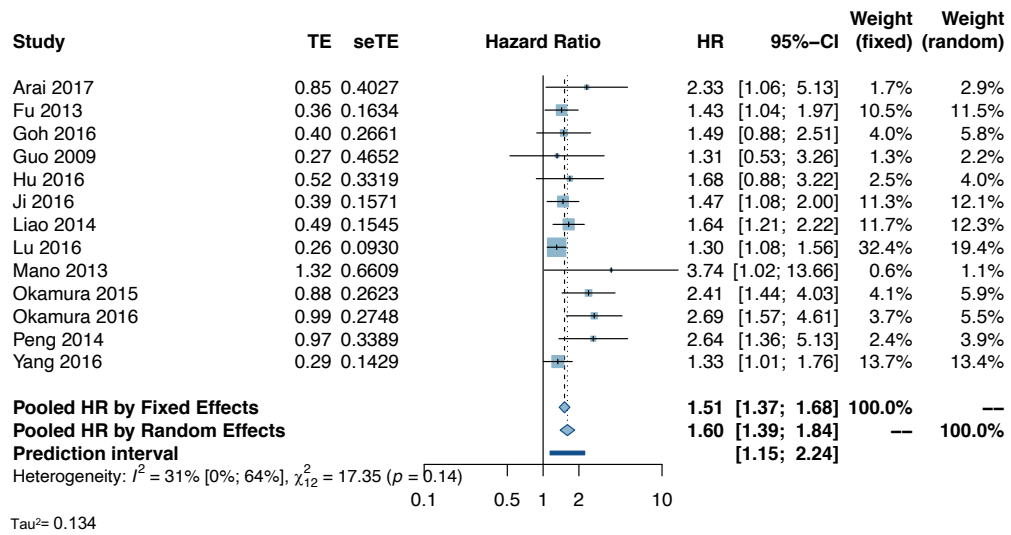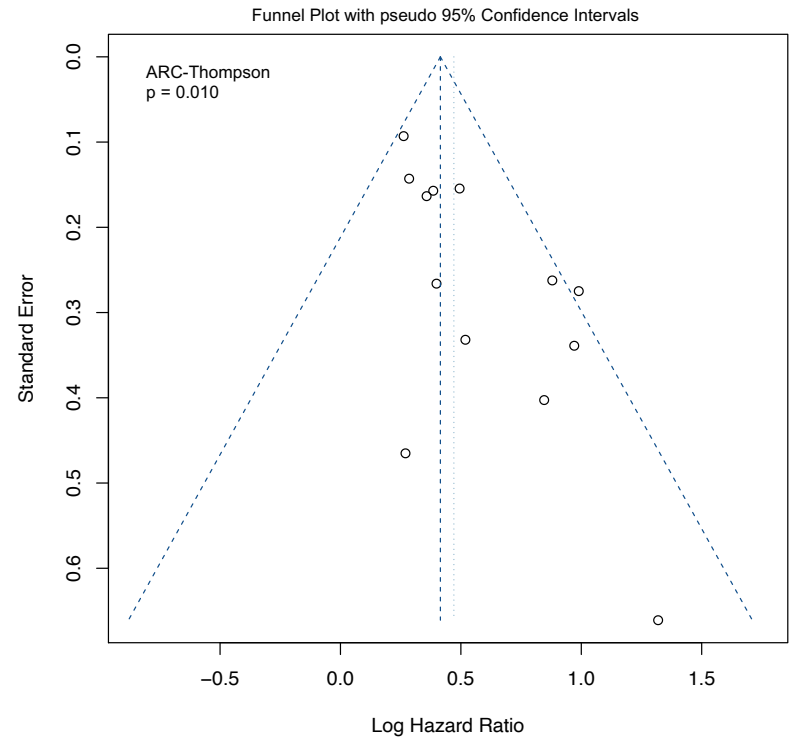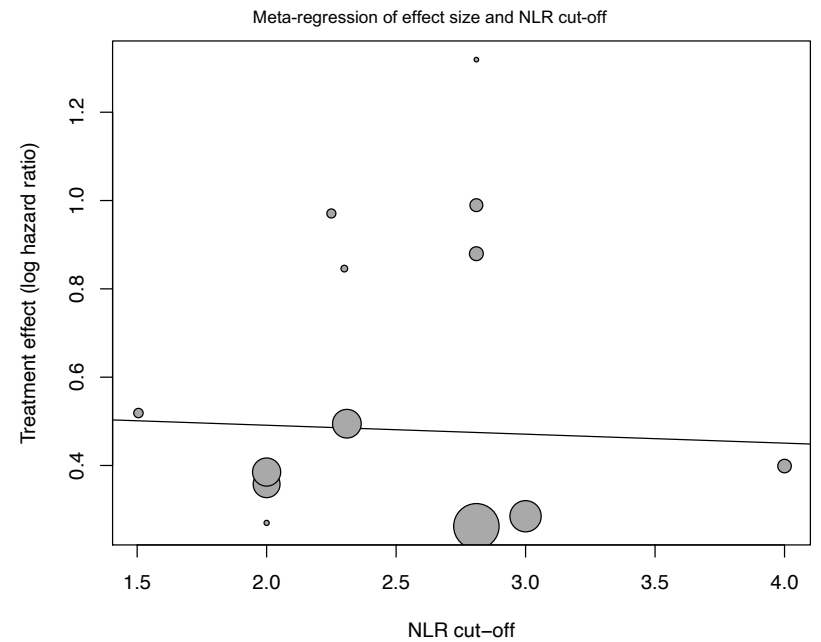

Supplementary Figure 202 - NLR: DFS in Hepatocellular (SR)

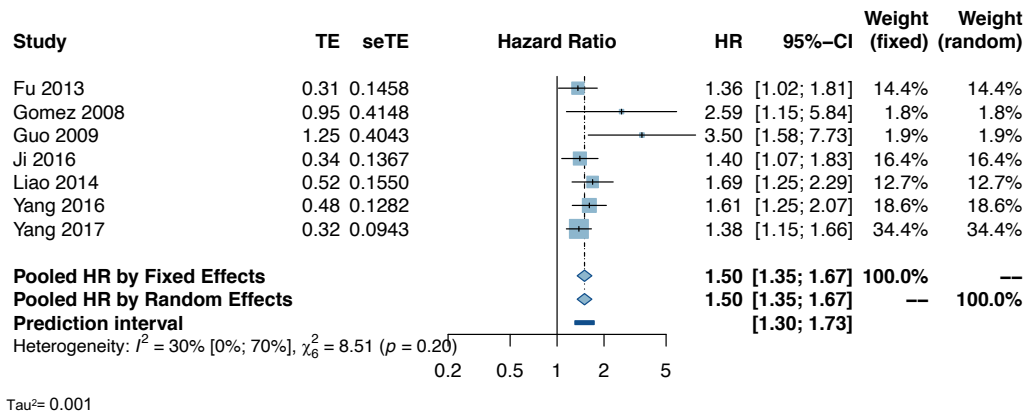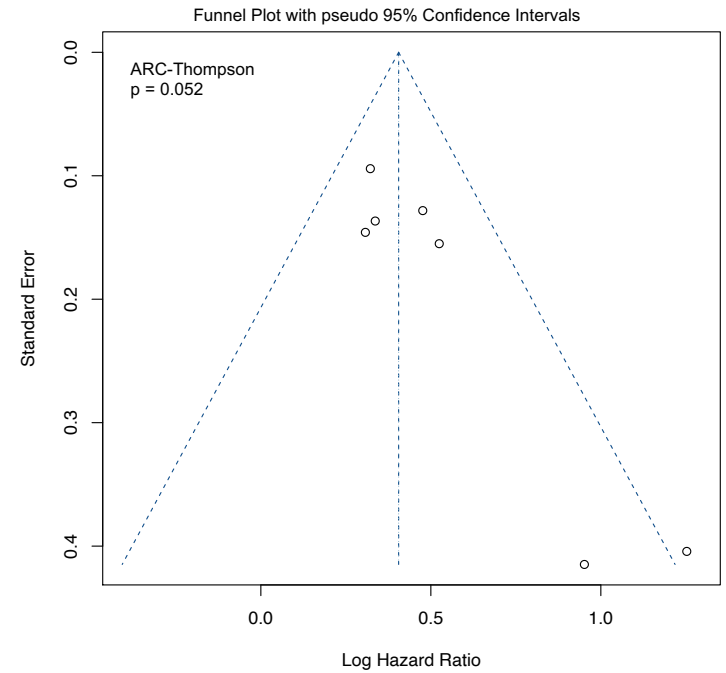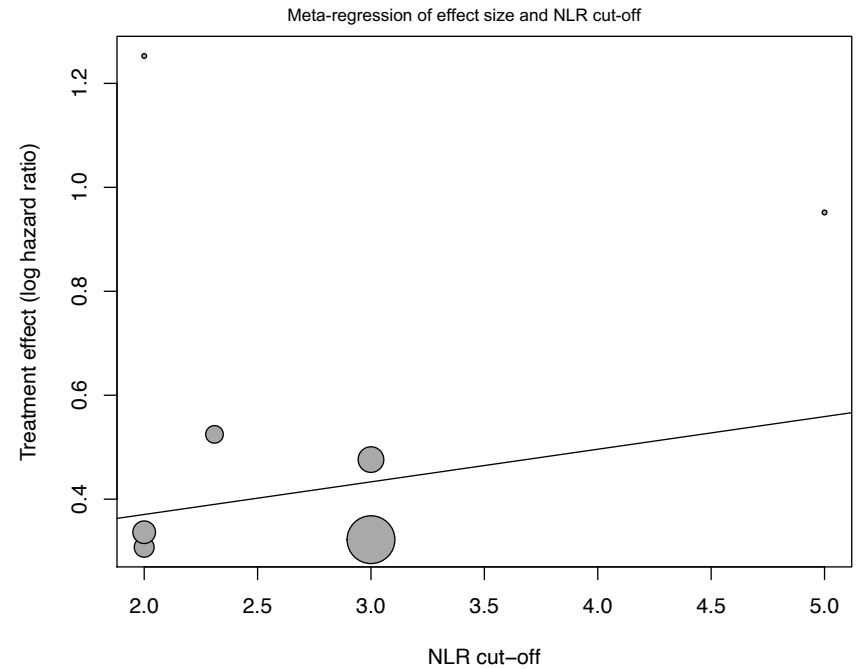

Supplementary Figure 203 - NLR: OS in Prostate

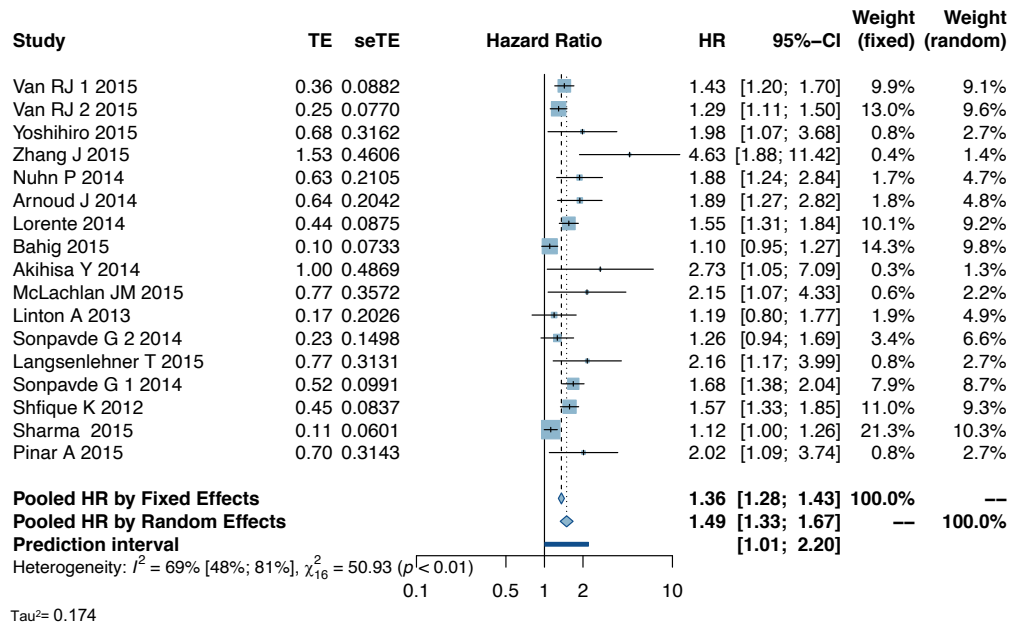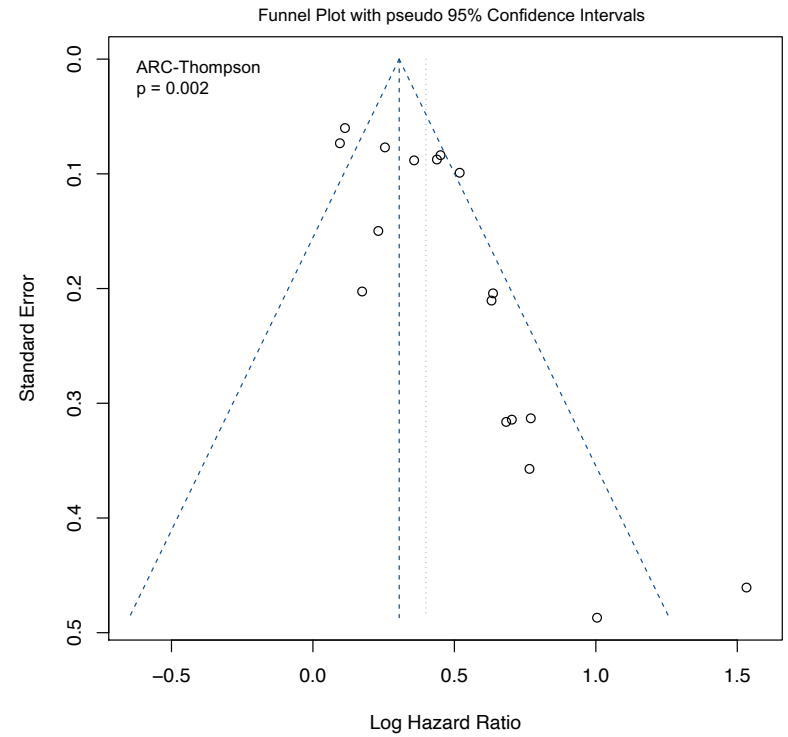

Supplementary Figure 204 - NLR: RFS in Prostate Localised

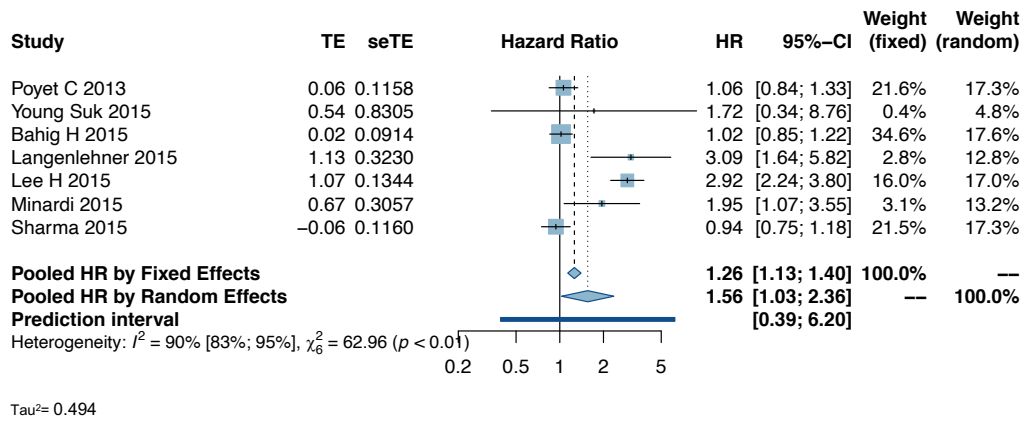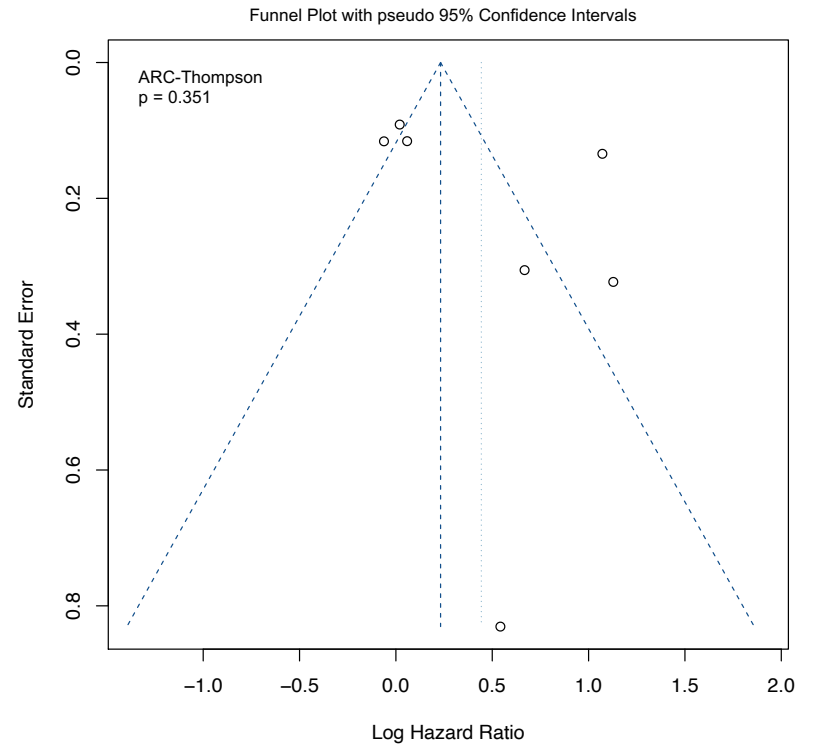

Supplementary Figure 205 - NLR: OS in NSCLC (Immunotherapy)

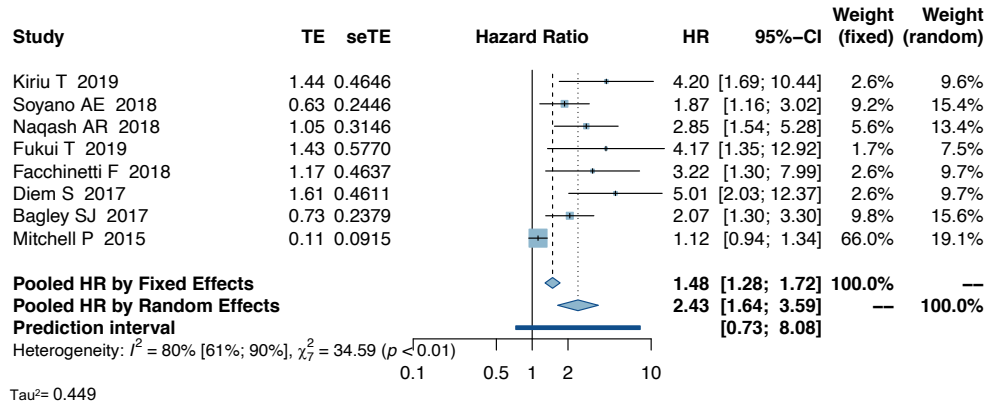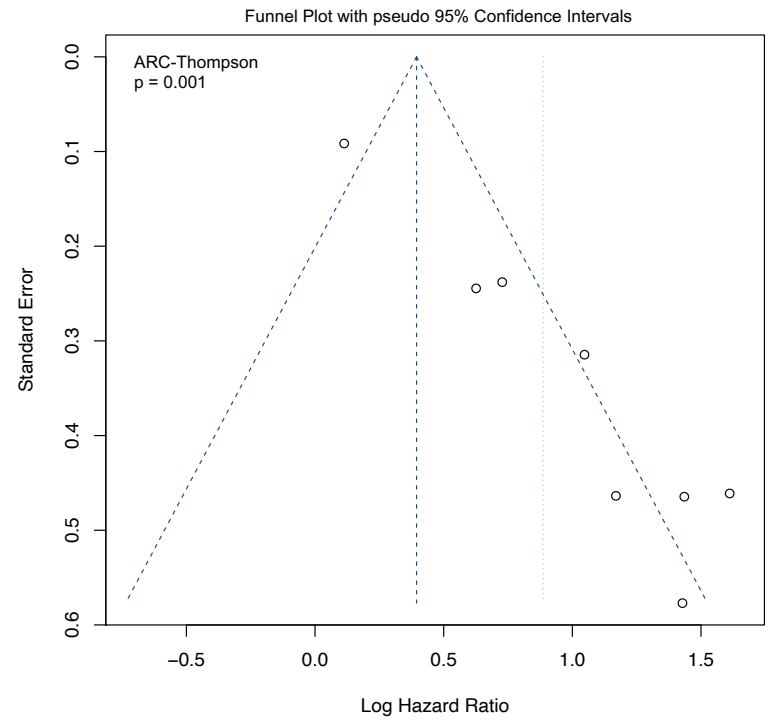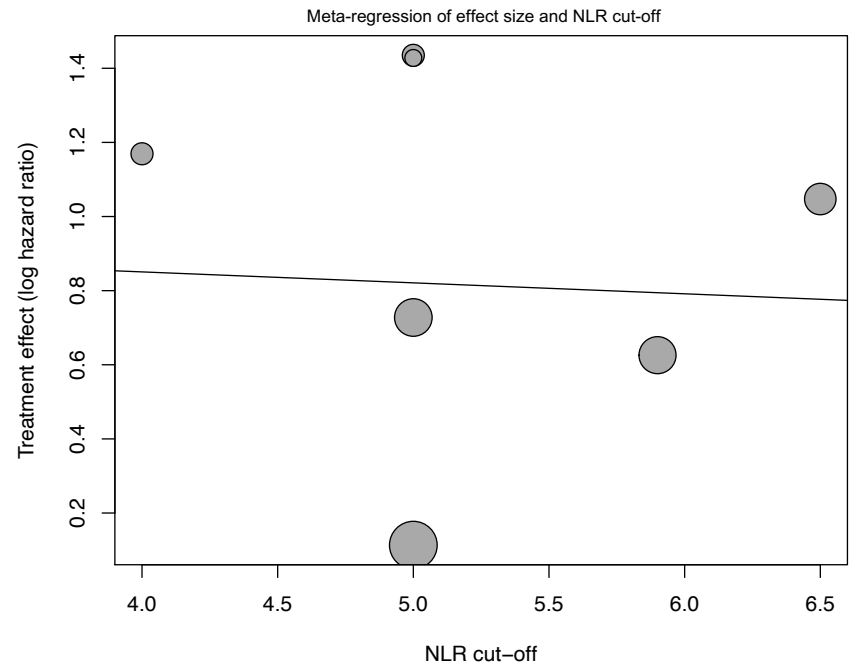

## Supplementary references

- Kyrgiou, M., Kalliala, I., Markozannes, G., Gunter, M. J., Paraskevaidis, E., Gabra, H., Martin-Hirsch, P., et al. (2017). "Adiposity and cancer at major anatomical sites: umbrella review of the literature." **BMJ** 356: j477.
- Theodoratou, E., Tzoulaki, I., Zgaga, L. and Ioannidis, J. P. (2014). "Vitamin D and multiple health outcomes: umbrella review of systematic reviews and meta-analyses of observational studies and randomised trials." **BMJ** 348: g2035.
- Tsilidis, K. K., Kasimis, J. C., Lopez, D. S., Ntzani, E. E. and Ioannidis, J. P. (2015). "Type 2 diabetes and cancer: umbrella review of meta-analyses of observational studies." **BMJ** 350: g7607.
