# Supplementary material for: Neutrophil to lymphocyte ratio and cancer prognosis: an umbrella review of systematic reviews and meta-analyses of observational studies
Source: PubMed Central journal article supplement (PMC7678319; doi:10.1186/s12916-020-01817-1), 2020-11-20
Supplement: 12916_2020_1817_MOESM3_ESM.pdf [file 12916_2020_1817_MOESM3_ESM.pdf]

**Supplementary Table 1 - Description of 204 included meta-analyses**

| Author             | Year | Biomarker | Cancer site                                  | meta-analysis metric | N   | Sample size (HNLN/LNLR)       | Fixed Effects |             |             | Random Effects |             |             | Largest Study |             |             | 95% Prediction Interval |             |
|--------------------|------|-----------|----------------------------------------------|----------------------|-----|-------------------------------|---------------|-------------|-------------|----------------|-------------|-------------|---------------|-------------|-------------|-------------------------|-------------|
|                    |      |           |                                              |                      |     |                               | HR            | Lower Limit | Upper Limit | HR             | Lower Limit | Upper Limit | HR            | Lower Limit | Upper Limit | Lower Limit             | Upper Limit |
| Jiang T (1)        | 2018 | NLR       | Advanced Cancer with Anti-VEGFR              | OS                   | 14  | 2918                          | 1.45          | 1.35        | 1.55        | 2.02           | 1.61        | 2.53        | 2.29          | 1.86        | 2.82        | 0.88                    | 4.64        |
| Jiang T (1)        | 2018 | NLR       | Advanced Cancer (Immunotherapy)              | OS                   | 23  | 4355                          | 1.51          | 1.41        | 1.61        | 1.95           | 1.67        | 2.29        | 2.29          | 1.86        | 2.82        | 1.03                    | 3.71        |
| Jiang T (1)        | 2018 | NLR       | Advanced Cancer (Immunotherapy)              | PFS                  | 16  | 2318                          | 1.25          | 1.19        | 1.31        | 1.78           | 1.47        | 2.15        | 1.54          | 1.17        | 2.04        | 0.9                     | 3.54        |
| Mei Z (2)          | 2017 | NLR       | All Cancers                                  | OS                   | 65  | 18262 <sup>†</sup>            | 1.1           | 1.08        | 1.12        | 1.68           | 1.56        | 1.82        | 0.8           | 0.55        | 1.16        | 1.04                    | 2.72        |
| Mei Z (2)          | 2017 | NLR       | All Cancers                                  | PFS                  | 23  | 5607                          | 1.25          | 1.21        | 1.3         | 1.63           | 1.43        | 1.86        | 1.73          | 1.42        | 1.88        | 0.94                    | 2.81        |
| Shen M (3)         | 2014 | IN        | All Cancers                                  | OS                   | 16  | 3335                          | 1.46          | 1.32        | 1.6         | 1.66           | 1.37        | 2.02        | 1.16          | 0.98        | 1.38        | 0.81                    | 3.4         |
| Shen M (3)         | 2014 | IN        | All Cancers                                  | CSS                  | 2   | 437                           | 3.36          | 2.08        | 5.41        | 3.36           | 2.08        | 5.41        | 3.13          | 1.43        | 6.83        | NA                      | NA          |
| Paramanathan A (4) | 2014 | NLR       | All Cancers                                  | DFS                  | 20  | 13065                         | 1.29          | 1.28        | 1.31        | 2.11           | 1.71        | 2.6         | 1.2           | 1.18        | 1.22        | 0.81                    | 5.47        |
| Shen M (3)         | 2014 | PN        | All Cancers                                  | OS                   | 2   | 535                           | 1.26          | 0.97        | 1.63        | 1.66           | 0.64        | 4.32        | 1.06          | 0.79        | 1.41        | NA                      | NA          |
| Shen M (3)         | 2014 | SN        | All Cancers                                  | OS                   | 2   | 535                           | 1.07          | 0.84        | 1.35        | 1.1            | 0.76        | 1.6         | 0.93          | 0.69        | 1.25        | NA                      | NA          |
| Dolan R (5)        | 2017 | NLR       | All Cancers Operable                         | OS                   | 120 | 68603 (18667/49936)           | 1.17          | 1.16        | 1.18        | 1.66           | 1.55        | 1.77        | 1.23          | 1           | 1.5         | 0.97                    | 2.84        |
| Dolan R (5)        | 2017 | NLR       | All Cancers Operable                         | CSS                  | 41  | 21175 (4617/16558)            | 1.06          | 1.05        | 1.08        | 1.5            | 1.35        | 1.67        | 1.09          | 0.94        | 1.26        | 0.87                    | 2.58        |
| Tang H (6)         | 2017 | NLR       | Biliary Tract                                | OS                   | 14  | 3217 (1295/1710) <sup>†</sup> | 1.49          | 1.36        | 1.63        | 1.52           | 1.36        | 1.7         | 1.26          | 1.06        | 1.5         | 1.19                    | 1.93        |
| Tang H (6)         | 2017 | NLR       | Biliary Tract                                | RFS                  | 5   | 637 (303/244)                 | 1.39          | 1.19        | 1.62        | 1.41           | 1.19        | 1.68        | 1.25          | 0.92        | 1.7         | 0.97                    | 2.07        |
| Hu G (7)           | 2019 | NLR       | Bladder                                      | OS                   | 18  | 11945                         | 1.07          | 1.05        | 1.09        | 1.37           | 1.18        | 1.6         | 1.10          | 1.00        | 1.20        | 0.78                    | 2.43        |
| Wu S (8)           | 2018 | NLR       | Bladder                                      | RFS                  | 9   | 8075                          | 1.31          | 1.23        | 1.39        | 1.52           | 1.29        | 1.79        | 1.2           | 1.1         | 1.3         | 0.93                    | 2.48        |
| Wu S (8)           | 2018 | NLR       | Bladder (Metastasis)                         | OS                   | 4   | 862                           | 1.64          | 1.38        | 1.94        | 1.64           | 1.38        | 1.94        | 1.74          | 1.32        | 2.29        | 1.13                    | 2.38        |
| Hu G (7)           | 2019 | NLR       | Bladder (Radical Cystectomy and NAC)         | OS                   | 4   | 447                           | 1.06          | 1.00        | 1.12        | 1.07           | 0.98        | 1.16        | 1.02          | 0.94        | 1.10        | 0.80                    | 1.41        |
| Hu G (7)           | 2019 | NLR       | Bladder (Radical Cystectomy)                 | OS                   | 8   | 10363                         | 1.06          | 1.03        | 1.08        | 1.13           | 1.05        | 1.23        | 1.10          | 1.00        | 1.20        | 0.92                    | 1.40        |
| Suh J (9)          | 2019 | NLR       | Bladder (Urothelial Transurethral Resection) | PFS                  | 4   | 1040                          | 2.45          | 1.49        | 4.02        | 2.45           | 1.49        | 4.02        | 2.37          | 1.17        | 4.78        | 0.82                    | 7.28        |
| Suh J (9)          | 2019 | NLR       | Bladder (Urothelial Transurethral Resection) | RFS                  | 5   | 1129                          | 2.22          | 1.81        | 2.74        | 2.22           | 1.81        | 2.74        | 2.08          | 1.60        | 2.70        | 1.59                    | 3.12        |
| Li X (10)          | 2017 | NLR       | Bladder and Upper Urinary                    | PFS                  | 19  | 8182                          | 1.48          | 1.34        | 1.63        | 1.68           | 1.44        | 1.95        | 1.05          | 0.87        | 1.26        | 1.07                    | 2.62        |
| Li X (10)          | 2017 | NLR       | Bladder and Upper Urinary                    | CSS                  | 17  | 7645                          | 1.34          | 1.25        | 1.43        | 1.62           | 1.39        | 1.89        | 1.07          | 0.87        | 1.31        | 0.99                    | 2.66        |
| Ethier JL (11)     | 2017 | NLR       | Breast                                       | OS                   | 13  | 8015                          | 2.14          | 1.83        | 2.5         | 2.54           | 1.96        | 3.3         | 1.63          | 1.07        | 2.48        | 1.2                     | 3.3         |
| Liu X (12)         | 2017 | NLR       | Breast                                       | DFS                  | 12  | 5523                          | 1.05          | 1.01        | 1.1         | 1.65           | 1.3         | 2.1         | 1.5           | 1.14        | 1.97        | 0.83                    | 3.27        |
| Liu X (12)         | 2017 | NLR       | Breast                                       | CSS                  | 4   | 4186                          | 1.17          | 1.02        | 1.34        | 2.03           | 1.08        | 3.82        | 1.09          | 0.94        | 1.26        | 0.14                    | 29.25       |
| Chen J (13)        | 2018 | NLR       | Breast (Metastasis)                          | OS                   | 2   | 858                           | 2.81          | 2.12        | 3.71        | 2.81           | 2.12        | 3.71        | 2.7           | 1.19        | 6.16        | NA                      | NA          |

|                  |      |     |                                            |     |    |                  |      |      |      |      |      |      |           |      |       |      |          |
|------------------|------|-----|--------------------------------------------|-----|----|------------------|------|------|------|------|------|------|-----------|------|-------|------|----------|
| Chen J (13)      | 2018 | NLR | Breast (Metastasis)                        | DFS | 3  | 1003             | 2.15 | 1.53 | 3.01 | 2.15 | 1.53 | 3.01 | 2.2       | 1.29 | 3.75  | 0.24 | 19.27    |
| Chen J (13)      | 2018 | NLR | Breast (No Metastasis)                     | OS  | 2  | 488              | 2.28 | 1.73 | 2.99 | 1.46 | 0.37 | 5.7  | 0.7       | 0.4  | 1.4   | NA   | NA       |
| Chen J (13)      | 2018 | NLR | Breast (No Metastasis)                     | DFS | 2  | 466              | 0.87 | 0.56 | 1.35 | 0.87 | 0.56 | 1.35 | 0.8       | 0.5  | 1.3   | NA   | NA       |
| Duan J (14)      | 2018 | NLR | Breast (SR)                                | DFS | 15 | 7820             | 1.10 | 1.06 | 1.15 | 1.58 | 1.27 | 1.96 | 2.58      | 1.23 | 5.42  | 0.76 | 3.29     |
| Duan J (14)      | 2018 | NLR | Breast (SR)                                | OS  | 12 | 6233             | 2.32 | 1.91 | 2.82 | 2.47 | 1.71 | 3.56 | 3.05      | 1.08 | 8.61  | 0.84 | 7.25     |
| Duan J (14)      | 2018 | NLR | Breast (SR)                                | RFS | 2  | 319              | 4.05 | 1.94 | 8.46 | 4.05 | 1.94 | 8.46 | 4.60      | 1.09 | 19.10 |      |          |
| Guo W (15)       | 2019 | NLR | Breast (Triple Negative and Her2 Positive) | DFS | 27 | 11369            | 1.52 | 1.41 | 1.64 | 1.59 | 1.41 | 1.8  | 1.50      | 1.14 | 1.97  | 1.04 | 2.45     |
| Guo W (15)       | 2019 | NLR | Breast (Triple Negative and Her2 Positive) | OS  | 28 | 14128            | 1.50 | 1.38 | 1.62 | 1.78 | 1.49 | 2.12 | 1.03      | 0.57 | 1.86  | 0.84 | 3.76     |
| Liu X (12)       | 2017 | NLR | Breast (Triple-negative)                   | OS  | 4  | 608              | 2.58 | 1.63 | 4.06 | 2.58 | 1.63 | 4.06 | 3.05      | 1.08 | 8.61  | 0.95 | 7.01     |
| Liu X (12)       | 2017 | NLR | Breast (Triple-negative)                   | DFS | 4  | 461              | 3.51 | 1.97 | 6.25 | 3.51 | 1.97 | 6.25 | 2.58      | 1.23 | 5.42  | 0.99 | 12.47    |
| Wu J (16)        | 2017 | NLR | Cervical                                   | OS  | 12 | 3661             | 1.21 | 1.16 | 1.26 | 1.46 | 1.21 | 1.76 | 1.19      | 1.13 | 1.25  | 0.83 | 2.57     |
| Wu J (16)        | 2017 | NLR | Cervical                                   | PFS | 10 | 2452             | 1.19 | 1.14 | 1.24 | 1.71 | 1.32 | 2.22 | 1.13      | 1.08 | 1.18  | 0.7  | 4.18     |
| Zhang J (17)     | 2017 | NLR | Colorectal                                 | DFS | 5  | 2178             | 1.66 | 1.31 | 2.12 | 1.76 | 1.27 | 2.42 | 1.24      | 0.86 | 1.79  | 0.74 | 4.17     |
| Zheng DC (18)    | 2016 | NLR | Colorectal                                 | OS  | 21 | 7927             | 1.59 | 1.45 | 1.74 | 1.92 | 1.58 | 2.32 | 1.31      | 1.09 | 1.57  | 0.95 | 3.88     |
| Zheng DC (18)    | 2016 | NLR | Colorectal                                 | PFS | 14 | 3662             | 1.71 | 1.48 | 1.97 | 1.91 | 1.48 | 2.46 | 1.95      | 0.71 | 5.37  | 0.86 | 4.23     |
| Malietzis G (19) | 2014 | NLR | Colorectal (PC)                            | DFS | 3  | 515 (148/367)    | 1.53 | 1.23 | 1.9  | 1.53 | 1.23 | 1.9  | 1.51      | 1.1  | 2.06  | 0.38 | 6.2      |
| Li H (20)        | 2019 | NLR | Colorectal (SR)                            | DFS | 9  | 4237             | 1.42 | 1.20 | 1.69 | 1.54 | 1.18 | 2    | 1.24      | 0.86 | 1.79  | 0.74 | 3.18     |
| Li H (20)        | 2019 | NLR | Colorectal (SR)                            | OS  | 11 | 4832             | 1.58 | 1.39 | 1.79 | 1.67 | 1.37 | 2.03 | 1.29      | 1.07 | 1.80  | 0.93 | 2.99     |
| Li H (20)        | 2019 | NLR | Colorectal (SR)                            | RFS | 3  | 643              | 2.31 | 1.69 | 3.17 | 2.31 | 1.69 | 3.17 | 1.81      | 1.07 | 3.07  | 0.30 | 17.85    |
| Tang H (21)      | 2016 | NLR | CLM                                        | OS  | 7  | 1491             | 2.17 | 1.83 | 2.57 | 2.17 | 1.83 | 2.57 | 2.28      | 1.65 | 3.13  | 1.73 | 2.72     |
| Tang H (21)      | 2016 | NLR | CLM                                        | RFS | 6  | 1093             | 1.96 | 1.63 | 2.35 | 1.97 | 1.48 | 2.62 | 2.21      | 1.7  | 2.88  | 0.91 | 4.23     |
| Tang H (21)      | 2016 | NLR | CLM (Non-surgical)                         | OS  | 2  | 182              | 3.11 | 1.83 | 5.29 | 3.11 | 1.83 | 5.29 | 2.9       | 1.51 | 5.55  | NA   | NA       |
| Tang H (21)      | 2016 | NLR | CLM (Non-surgical)                         | RFS | 2  | 190              | 2.33 | 1.37 | 3.95 | 2.32 | 1.23 | 4.38 | 1.67      | 0.78 | 3.57  | NA   | NA       |
| Tang H (21)      | 2016 | NLR | CLM (SR)                                   | OS  | 5  | 1309             | 2.08 | 1.73 | 2.49 | 2.08 | 1.73 | 2.49 | 2.28      | 1.65 | 3.13  | 1.55 | 2.79     |
| Tang H (21)      | 2016 | NLR | CLM (SR)                                   | RFS | 4  | 903              | 1.91 | 1.58 | 2.32 | 1.89 | 1.34 | 2.66 | 2.21      | 1.7  | 2.88  | 0.49 | 7.25     |
| Ni L (22)        | 2020 | NLR | Endometrial carcinoma                      | OS  | 9  | 2942             | 2.22 | 1.76 | 2.79 | 2.22 | 1.76 | 2.79 | 1.82      | 1.27 | 2.62  | 1.68 | 2.92     |
| Ni L (22)        | 2020 | NLR | Endometrial carcinoma                      | PFS | 5  | 1798             | 1.80 | 1.35 | 2.40 | 1.84 | 1.31 | 2.57 | 1.65      | 1.02 | 2.65  | 0.82 | 4.12     |
| Sun J (23)       | 2016 | NLR | Gastric                                    | OS  | 19 | 5431             | 1.98 | 1.87 | 2.1  | 1.98 | 1.75 | 2.23 | 1.52      | 1.33 | 1.75  | 1.39 | 2.82     |
| Sun J (23)       | 2016 | NLR | Gastric                                    | DFS | 7  | 976              | 1.58 | 1.33 | 1.88 | 1.58 | 1.33 | 1.88 | 1.65      | 1.09 | 2.49  | 1.26 | 1.99     |
| Shen M (3)       | 2014 | IN  | Gastric                                    | OS  | 2  | 388              | 1.01 | 0.74 | 1.39 | 1.2  | 0.5  | 2.89 | 1.94      | 1.08 | 3.5   | NA   | NA       |
| Zhang X (24)     | 2014 | NLR | Gastric                                    | PFS | 2  | 314              | 1.54 | 1.22 | 1.95 | 1.59 | 1.15 | 2.19 | 2.48      | 1.15 | 1.89  | NA   | NA       |
| Szor D (25)      | 2018 | NLR | Gastric (SR)                               | OS  | 7  | 3223 (1018/2205) | 3.05 | 2.5  | 3.66 | 3.13 | 1.99 | 4.92 | 10.0<br>1 | 6.47 | 15.48 | 0.69 | 14.24    |
| Mellor K (26)    | 2018 | NLR | Gastric (SR)                               | DFS | 3  | 820 (156/664)    | 3.14 | 2.14 | 4.6  | 2.73 | 1.18 | 6.34 | 6.03      | 3.45 | 10.53 | 0    | 58896.33 |
| Zhou Y (27)      | 2018 | NLR | GNT                                        | OS  | 4  | 422              | 3.06 | 1.97 | 4.76 | 3.06 | 1.97 | 4.76 | 3.6       | 1.33 | 9.71  | 1.16 | 8.08     |
| Zhou Y (27)      | 2018 | NLR | GNT                                        | RFS | 3  | 300              | 3.26 | 2.01 | 5.28 | 3.26 | 2.01 | 5.29 | 2.75      | 1.57 | 4.81  | 0.14 | 76.19    |
| Luo XF (28)      | 2018 | NLR | Gastrointestinal stromal                   | OS  | 2  | 278              | 1.13 | 1.05 | 1.22 | 1.74 | 0.63 | 4.84 | 1.12      | 1.04 | 1.21  | NA   | NA       |

|                |      |     |                                              |     |    |                                   |      |      |      |      |      |      |      |      |       |      |        |
|----------------|------|-----|----------------------------------------------|-----|----|-----------------------------------|------|------|------|------|------|------|------|------|-------|------|--------|
| Lei Y (29)     | 2019 | NLR | Glioma                                       | OS  | 16 | 2275                              | 1.03 | 1.01 | 1.06 | 1.52 | 1.28 | 1.81 | 1.00 | 0.70 | 1.43  | 0.81 | 2.88   |
| Ethier JL (30) | 2017 | NLR | Gynecologic                                  | OS  | 27 | 10530                             | 1.24 | 1.19 | 1.29 | 1.72 | 1.46 | 2.03 | 1.3  | 1.05 | 1.62  | 0.89 | 3.35   |
| Yu Y (31)      | 2018 | NLR | Head and Neck                                | RFS | 4  | 658                               | 1.34 | 1.13 | 1.59 | 1.63 | 1.1  | 2.41 | 1.81 | 1.28 | 2.56  | 0.34 | 7.87   |
| Tham T (32)    | 2018 | NLR | Head and Neck                                | OS  | 26 | 6769                              | 1.63 | 1.48 | 1.81 | 1.72 | 1.51 | 1.96 | 1.57 | 1.04 | 2.39  | 1.18 | 2.52   |
| Tham T (32)    | 2018 | NLR | Head and neck                                | PFS | 6  | 2173                              | 1.44 | 1.23 | 1.69 | 1.5  | 1.18 | 1.93 | 1.68 | 1.19 | 2.38  | 0.74 | 3.05   |
| Tham T (32)    | 2018 | NLR | Head and neck                                | DFS | 11 | 1692                              | 1.51 | 1.27 | 1.79 | 1.66 | 1.3  | 2.11 | 0.98 | 0.73 | 1.33  | 0.91 | 3.03   |
| Shen M (3)     | 2014 | IN  | Head and Neck                                | OS  | 3  | 220                               | 1.69 | 1.1  | 2.61 | 1.69 | 1.1  | 2.61 | 1.98 | 0.3  | 4.18  | 0.1  | 28.67  |
| Tham T (32)    | 2018 | NLR | Head and Neck (No Surgery)                   | OS  | 9  | 3285                              | 1.44 | 1.21 | 1.71 | 1.48 | 1.21 | 1.82 | 1.57 | 1.04 | 2.39  | 0.97 | 2.26   |
| Yang L (33)    | 2019 | NLR | Head and Neck (SCC)                          | CSS | 5  | 1854                              | 1.46 | 1.24 | 1.73 | 1.46 | 1.24 | 1.73 | 1.38 | 1.07 | 1.77  | 1.12 | 1.91   |
| Yang L (33)    | 2019 | NLR | Head and Neck (SCC)                          | PFS | 4  | 461                               | 1.40 | 1.15 | 1.71 | 1.53 | 1.11 | 2.11 | 2.20 | 1.13 | 4.29  | 0.46 | 5.13   |
| Cho J (34)     | 2018 | NLR | Head and Neck (SCC)                          | OS  | 24 | 5650                              | 1.77 | 1.59 | 1.96 | 1.96 | 1.66 | 2.31 | 1.71 | 0.14 | 20.30 | 1.11 | 3.45   |
| Cho J (34)     | 2018 | NLR | Head and Neck (SCC)                          | DFS | 12 | 2079                              | 1.43 | 1.26 | 1.63 | 1.9  | 1.41 | 2.54 | 0.98 | 0.73 | 1.32  | 0.75 | 4.79   |
| Tham T (32)    | 2018 | NLR | Head and Neck (SR)                           | OS  | 3  | 707                               | 1.54 | 1.23 | 1.93 | 1.76 | 1.17 | 2.65 | 1.31 | 1.00 | 1.71  | 0.02 | 144.88 |
| Min GT (35)    | 2018 | NLR | Hepatocellular                               | OS  | 44 | 10491<br>(2594/5312) <sup>†</sup> | 1.22 | 1.18 | 1.25 | 1.64 | 1.41 | 1.9  | 1.3  | 1.07 | 1.56  | 0.6  | 3.95   |
| Min GT (35)    | 2018 | NLR | Hepatocellular                               | DFS | 17 | 3881 (919/1729) <sup>†</sup>      | 1.23 | 1.15 | 1.32 | 1.82 | 1.4  | 2.37 | 1.38 | 1.15 | 1.66  | 0.67 | 4.92   |
| Min GT (35)    | 2018 | NLR | Hepatocellular                               | RFS | 16 | 5037 (1470/3188) <sup>†</sup>     | 1.13 | 1.11 | 1.15 | 1.85 | 1.48 | 2.32 | 1.32 | 1.06 | 1.64  | 0.8  | 4.29   |
| Xiao WK (36)   | 2014 | NLR | Hepatocellular (MT)                          | OS  | 3  | 522 (213/309)                     | 1.85 | 1.4  | 2.44 | 1.87 | 1.39 | 2.53 | 1.6  | 1.12 | 2.28  | 0.2  | 17.22  |
| Xiao WK (36)   | 2014 | NLR | Hepatocellular (RFA)                         | OS  | 2  | 370 (172/198)                     | 1.27 | 1.14 | 1.42 | 1.27 | 1.12 | 1.45 | 1.25 | 1.11 | 1.4   | NA   | NA     |
| Xiao WK (36)   | 2014 | NLR | Hepatocellular (RFA)                         | DFS | 2  | 1054 (264/790)                    | 1.07 | 0.82 | 1.39 | 1.07 | 0.82 | 1.39 | 1.27 | 0.83 | 1.96  | NA   | NA     |
| Liu L (37)     | 2019 | NLR | Hepatocellular (Sorfenib)                    | OS  | 11 | 2324                              | 1.38 | 1.28 | 1.49 | 1.73 | 1.45 | 2.07 | 2.13 | 1.46 | 3.12  | 1.03 | 2.91   |
| Wang Y (38)    | 2018 | NLR | Hepatocellular (SR)                          | RFS | 10 | 3404 (940/2298) <sup>†</sup>      | 1.64 | 1.44 | 1.86 | 1.71 | 1.45 | 2.03 | 1.32 | 1.06 | 1.64  | 1.16 | 2.53   |
| Wang Y (38)    | 2018 | NLR | Hepatocellular (SR)                          | OS  | 13 | 4225 (1336/2723) <sup>*</sup>     | 1.51 | 1.37 | 1.68 | 1.6  | 1.39 | 1.84 | 1.30 | 1.07 | 1.56  | 1.15 | 2.24   |
| Wang Y (38)    | 2018 | NLR | Hepatocellular (SR)                          | DFS | 7  | 1272 (581/691)                    | 1.50 | 1.35 | 1.67 | 1.5  | 1.35 | 1.67 | 1.40 | 1.08 | 1.83  | 1.30 | 1.73   |
| Li S (39)      | 2020 | NLR | Hepatocellular (TACE)                        | OS  | 16 | 4023                              | 1.81 | 1.67 | 1.97 | 1.85 | 1.64 | 2.08 | 1.38 | 1.07 | 1.78  | 1.33 | 2.57   |
| Xu ZG (40)     | 2018 | NLR | Hepatocellular (Transplant)                  | OS  | 8  | 1230 (352/878)                    | 1.53 | 1.28 | 1.82 | 2.19 | 1.4  | 3.43 | 1.42 | 0.88 | 2.3   | 0.49 | 9.71   |
| Xu ZG (40)     | 2018 | NLR | Hepatocellular (Transplant)                  | RFS | 4  | 83 (251/372) <sup>†</sup>         | 2.91 | 2.17 | 3.91 | 3.74 | 2.05 | 6.83 | 2.22 | 1.55 | 3.18  | 0.32 | 43.6   |
| Shen M (3)     | 2014 | IN  | Hepatocellular and ICC                       | OS  | 4  | 846                               | 1.79 | 1.48 | 2.17 | 1.8  | 1.33 | 2.43 | 2    | 1.46 | 2.75  | 0.54 | 5.99   |
| Yang L (33)    | 2019 | NLR | Hypopharynx                                  | OS  | 3  | 310                               | 2.88 | 2.06 | 4.02 | 2.88 | 2.06 | 4.02 | 2.99 | 1.91 | 4.67  | 0.33 | 25.01  |
| Tan Q (41)     | 2018 | NLR | Immunotherapy (Immune checkpoint inhibitors) | OS  | 18 | 1863                              | 1.07 | 1.02 | 1.12 | 2.21 | 1.7  | 2.88 | 1.95 | 1.11 | 3.43  | 0.82 | 5.97   |
| Tan Q (41)     | 2018 | NLR | Immunotherapy (Immune checkpoint inhibitors) | PFS | 11 | 1274                              | 1.06 | 1.01 | 1.11 | 1.75 | 1.39 | 2.21 | 1.46 | 1.06 | 2     | 0.84 | 3.66   |

|                    |      |     |                                         |     |    |      |      |      |      |      |      |      |      |      |      |      |        |
|--------------------|------|-----|-----------------------------------------|-----|----|------|------|------|------|------|------|------|------|------|------|------|--------|
| Xie X (42)         | 2019 | NLR | Ipilimumuab                             | OS  | 7  | 798  | 1.13 | 1.08 | 1.18 | 2.53 | 1.58 | 4.05 | 2.03 | 1.49 | 2.77 | 0.49 | 13.13  |
| Xie X (42)         | 2019 | NLR | Ipilimumuab                             | PFS | 3  | 370  | 2.11 | 1.77 | 2.52 | 2.02 | 1.29 | 3.18 | 1.01 | 1.33 | 2.46 | 0.01 | 330.06 |
| Mu S (43)          | 2018 | NLR | Large B                                 | OS  | 10 | †    | 1.62 | 1.35 | 1.95 | 1.86 | 1.2  | 2.88 | 1.14 | 0.8  | 1.63 | 0.44 | 7.85   |
| Mu S (43)          | 2018 | NLR | Large B                                 | PFS | 9  | †    | 1.45 | 1.21 | 1.74 | 1.6  | 1.1  | 2.33 | 1.54 | 1.06 | 2.24 | 0.48 | 5.36   |
| Yang L (33)        | 2019 | NLR | Larynx                                  | DFS | 3  | 1260 | 1.36 | 1.14 | 1.63 | 1.36 | 1.13 | 1.63 | 1.27 | 1.02 | 1.57 | 0.40 | 4.61   |
| Mascarella M (44)  | 2018 | NLR | Larynx                                  | OS  | 6  | 1017 | 1.52 | 1.26 | 1.85 | 1.57 | 1.25 | 1.98 | 1.31 | 1    | 1.72 | 1.01 | 2.46   |
| Zhao QT (45)       | 2015 | NLR | Lung                                    | OS  | 21 | 6942 | 1.21 | 1.16 | 1.25 | 1.55 | 1.33 | 1.8  | 1.53 | 1.46 | 1.78 | 0.83 | 2.89   |
| Zhao QT (45)       | 2015 | NLR | Lung                                    | PFS | 9  | 1748 | 1.24 | 1.17 | 1.31 | 1.38 | 1.02 | 1.87 | 1.48 | 1.09 | 2.02 | 0.49 | 3.87   |
| Yu Y (46)          | 2017 | NLR | Lung (Surgery)                          | OS  | 7  | 2877 | 1.2  | 1.14 | 1.27 | 1.49 | 1.24 | 1.79 | 1.53 | 1.46 | 1.78 | 0.85 | 2.61   |
| Zhan H (47)        | 2018 | NLR | Melanoma                                | OS  | 10 | 4437 | 1.1  | 1.06 | 1.14 | 1.6  | 1.26 | 2.02 | 1.25 | 1.02 | 1.53 | 0.72 | 3.54   |
| Ding Y (48)        | 2018 | NLR | Melanoma                                | PFS | 6  | 752  | 2.18 | 1.78 | 2.68 | 2.22 | 1.77 | 2.78 | 1.83 | 0.81 | 4.13 | 1.48 | 3.33   |
| Xie X (42)         | 2019 | NLR | Melanoma (Immune checkpoint inhibitors) | OS  | 9  | 1104 | 1.14 | 1.09 | 1.20 | 2.49 | 1.72 | 3.61 | 1.95 | 1.11 | 3.43 | 0.67 | 9.19   |
| Xie X (42)         | 2019 | NLR | Melanoma (Immune checkpoint inhibitors) | PFS | 4  | 467  | 2.07 | 1.78 | 2.41 | 2.1  | 1.71 | 2.59 | 1.81 | 1.33 | 2.46 | 1.02 | 4.33   |
| Chen N (49)        | 2017 | NLR | MPM                                     | OS  | 11 | 1378 | 1.26 | 1.17 | 1.37 | 1.48 | 1.14 | 1.93 | 1.01 | 0.75 | 1.36 | 0.63 | 3.5    |
| Zeng Q (50)        | 2018 | NLR | Multiple Myeloma                        | OS  | 8  | 1886 | 1.11 | 1.07 | 1.15 | 1.7  | 1.28 | 2.27 | 2.12 | 1.44 | 3.11 | 0.75 | 3.86   |
| Zeng Q (50)        | 2018 | NLR | Multiple Myeloma                        | PFS | 4  | 1334 | 1.09 | 1.04 | 1.14 | 1.78 | 1.07 | 2.96 | 2.47 | 1.44 | 4.24 | 0.17 | 18.19  |
| Yang S (51)        | 2019 | NLR | Nasopharyngeal                          | OS  | 10 | 7031 | 1.46 | 1.30 | 1.63 | 1.48 | 1.29 | 1.69 | 1.35 | 1.13 | 1.62 | 1.15 | 1.90   |
| Yin J (52)         | 2017 | NLR | Nasopharyngeal                          | PFS | 5  | 4130 | 1.48 | 1.3  | 1.69 | 1.5  | 1.3  | 1.73 | 1.35 | 1.13 | 1.62 | 1.12 | 1.99   |
| Su L (53)          | 2017 | NLR | Nasopharyngeal                          | CSS | 3  | 2320 | 1.42 | 1.21 | 1.67 | 1.44 | 1.19 | 1.74 | 1.35 | 1.13 | 1.62 | 0.33 | 6.27   |
| Li X (54)          | 2018 | NLR | NAC                                     | OS  | 18 | 3282 | 1.17 | 1.11 | 1.23 | 1.66 | 1.36 | 2.04 | 2.1  | 1.6  | 2.76 | 0.8  | 3.48   |
| Li X (54)          | 2018 | NLR | NAC                                     | RFS | 7  | 775  | 1.9  | 1.5  | 2.41 | 2.01 | 1.47 | 2.76 | 3.87 | 1.64 | 9.15 | 0.94 | 4.33   |
| Li X (54)          | 2018 | NLR | NAC                                     | CSS | 5  | 971  | 1.44 | 1.28 | 1.62 | 2.17 | 1.35 | 3.47 | 2.5  | 1.8  | 3.47 | 0.48 | 9.81   |
| Xie X (42)         | 2019 | NLR | Nivolumab                               | OS  | 6  | 442  | 2.55 | 1.89 | 3.46 | 2.7  | 1.81 | 4.04 | 2.07 | 1.30 | 3.30 | 1.01 | 7.21   |
| Xie X (42)         | 2019 | NLR | Nivolumab                               | PFS | 8  | 744  | 1.09 | 1.04 | 1.15 | 1.5  | 1.2  | 1.88 | 1.48 | 1.08 | 2.01 | 0.77 | 2.91   |
| Vartolomei MD (55) | 2018 | NLR | Non muscle Invasive Bladder             | RFS | 6  | 2298 | 1.57 | 1.36 | 1.8  | 1.76 | 1.33 | 2.32 | 1.27 | 1.05 | 1.53 | 0/81 | 3.83   |
| Vartolomei MD (55) | 2018 | NLR | Non muscle Invasive Bladder             | PFS | 6  | 2298 | 2.13 | 1.59 | 2.87 | 2.26 | 1.59 | 3.22 | 1.72 | 1.16 | 2.54 | 1.13 | 4.52   |
| Vartolomei MD (55) | 2018 | NLR | Non muscle Invasive Bladder (High Risk) | RFS | 4  | 599  | 1.82 | 1.34 | 2.47 | 2.31 | 1.27 | 4.18 | 1.46 | 1.01 | 2.11 | 0.22 | 23.88  |
| Vartolomei MD (55) | 2018 | NLR | Non muscle Invasive Bladder (High Risk) | PFS | 3  | 510  | 2.54 | 1.37 | 4.7  | 2.54 | 1.37 | 4.7  | 2.8  | 1.13 | 6.95 | 0.05 | 138.97 |
| Lu Y (56)          | 2020 | NLR | NSCLC                                   | OS  | 21 | 5141 | 1.30 | 1.24 | 1.38 | 1.41 | 1.26 | 1.59 | 0.91 | 0.72 | 1.14 | 0.90 | 2.22   |
| Gu XB (57)         | 2015 | NLR | NSCLC                                   | PFS | 10 | 2623 | 1.1  | 1.04 | 1.15 | 1.59 | 1.29 | 1.95 | 1.37 | 1.05 | 1.78 | 0.85 | 2.97   |
| Shen M (3)         | 2014 | IN  | NSCLC                                   | OS  | 2  | 967  | 1.16 | 1    | 1.35 | 1.16 | 1    | 1.35 | 1.16 | 0.98 | 1.38 | NA   | NA     |
| Wang Z (58)        | 2019 | NLR | NSCLC (Chemotherapy)                    | OS  | 9  | 1276 | 1.13 | 1.07 | 1.20 | 1.74 | 1.24 | 2.42 | 1.68 | 1.30 | 2.18 | 0.57 | 5.31   |
| Wang Z (58)        | 2019 | NLR | NSCLC (Chemotherapy)                    | PFS | 5  | 875  | 1.69 | 1.41 | 2.03 | 1.75 | 1.38 | 2.2  | 1.29 | 0.95 | 1.75 | 0.95 | 3.20   |
| Xie X (42)         | 2019 | NLR | NSCLC (Immune Checkpoint Inhibitors)    | PFS | 6  | 609  | 1.08 | 1.03 | 1.14 | 1.38 | 1.1  | 1.72 | 1.46 | 1.06 | 2.01 | 0.71 | 2.66   |
| Wang Z (58)        | 2019 | NLR | NSCLC (Immunotherapy)                   | OS  | 8  | 1396 | 1.48 | 1.28 | 1.72 | 2.43 | 1.64 | 3.59 | 1.12 | 0.94 | 1.34 | 0.73 | 8.08   |
| Cao D (59)         | 2018 | NLR | NSCLC (Nivoumab)                        | OS  | 8  | 666  | 1.15 | 1.10 | 1.20 | 1.72 | 1.33 | 2.23 | 2.07 | 1.30 | 3.30 | 0.80 | 3.74   |

|                  |      |     |                                  |     |    |               |      |      |       |      |      |       |      |      |       |      |       |
|------------------|------|-----|----------------------------------|-----|----|---------------|------|------|-------|------|------|-------|------|------|-------|------|-------|
| Cao D (59)       | 2018 | NLR | NSCLC (Nivoumab)                 | PFS | 10 | 900           | 1.18 | 1.12 | 1.24  | 1.51 | 1.15 | 2     | 1.46 | 1.06 | 2.01  | 0.57 | 4.04  |
| Jiang T (60)     | 2019 | NLR | NSCLC (PD-1 inhibitor)           | OS  | 13 | 2018          | 2.39 | 2.03 | 2.81  | 2.59 | 2.1  | 3.2   | 1.70 | 1.27 | 2.28  | 1.57 | 4.28  |
| Jiang T (60)     | 2019 | NLR | NSCLC (PD-1 inhibitor)           | PFS | 12 | 1614          | 1.63 | 1.42 | 1.87  | 1.63 | 1.42 | 1.87  | 1.83 | 1.12 | 2.98  | 1.39 | 1.91  |
| Wang Z (58)      | 2019 | NLR | NSCLC (ST)                       | OS  | 24 | 3694          | 1.10 | 1.07 | 1.14  | 1.87 | 1.53 | 2.29  | 1.12 | 0.94 | 1.34  | 0.77 | 4.52  |
| Wang Z (58)      | 2019 | NLR | NSCLC (ST)                       | PFS | 16 | 2679          | 1.09 | 1.04 | 1.13  | 1.5  | 1.29 | 1.74  | 1.36 | 1.04 | 1.76  | 0.89 | 2.51  |
| Wang Z (58)      | 2019 | NLR | NSCLC (TT)                       | OS  | 5  | 422           | 1.09 | 1.03 | 1.16  | 1.86 | 1.18 | 2.91  | 1.07 | 1.01 | 1.14  | 0.43 | 8.08  |
| Wang Z (58)      | 2019 | NLR | NSCLC (TT)                       | PFS | 5  | 619           | 1.06 | 0.99 | 1.13  | 1.51 | 1.06 | 2.13  | 1.24 | 0.69 | 2.21  | 0.48 | 4.70  |
| Zhang X (61)     | 2018 | NLR | Oesophageal                      | OS  | 26 | 8985          | 1.36 | 1.30 | 1.44  | 1.5  | 1.32 | 1.71  | 1.89 | 1.57 | 2.28  | 0.85 | 2.65  |
| Zhang X (61)     | 2018 | NLR | Oesophageal                      | CSS | 7  | 1885          | 1.45 | 1.25 | 1.68  | 1.42 | 1.12 | 1.8   | 1.59 | 1.13 | 2.23  | 0.72 | 2.81  |
| Zhang X (61)     | 2018 | NLR | Oesophageal                      | RFS | 3  | 677           | 1.62 | 1.26 | 2.08  | 1.61 | 1.16 | 2.25  | 1.52 | 1.09 | 2.13  | 0.07 | 37.24 |
| Zhang X (61)     | 2018 | NLR | Oesophageal                      | DFS | 10 | 2837          | 1.24 | 1.14 | 1.34  | 1.59 | 1.21 | 2.1   | 1.25 | 0.90 | 1.71  | 0.61 | 4.17  |
| Zhang X (61)     | 2018 | NLR | Oesophageal                      | PFS | 4  | 908           | 1.43 | 1.18 | 1.73  | 1.43 | 1.16 | 1.75  | 1.53 | 1.31 | 2.03  | 0.85 | 2.39  |
| Pirozzolo G (62) | 2019 | NLR | Oesophageal (DCRT)               | OS  | 3  | 1563          | 1.74 | 1.55 | 1.95  | 1.74 | 1.55 | 1.95  | 1.67 | 1.45 | 1.92  | 0.83 | 3.66  |
| Pirozzolo G (62) | 2019 | NLR | Oesophageal (Neo+Surgery)        | OS  | 3  | 1314          | 1.26 | 1.09 | 1.46  | 1.26 | 1.09 | 1.46  | 1.26 | 1.01 | 1.57  | 0.50 | 3.21  |
| Zhang X (61)     | 2018 | NLR | Oesophageal (No Surgery)         | OS  | 4  | 1046          | 1.70 | 1.45 | 2.01  | 1.72 | 1.28 | 2.31  | 1.86 | 1.50 | 2.30  | 0.54 | 5.42  |
| Zhang X (61)     | 2018 | NLR | Oesophageal (Surgery)            | OS  | 22 | 7119          | 1.33 | 1.26 | 1.41  | 1.48 | 1.27 | 1.73  | 1.89 | 1.57 | 2.28  | 0.79 | 2.78  |
| Pirozzolo G (62) | 2019 | NLR | Oesophageal (Surgery+/-Chemo)    | OS  | 14 | 3580          | 1.69 | 1.51 | 1.88  | 1.77 | 1.43 | 2.2   | 1.34 | 1.02 | 1.77  | 0.83 | 3.78  |
| Zhang X (61)     | 2018 | NLR | Oesophageal SCC                  | OS  | 18 | 7403          | 1.39 | 1.30 | 1.49  | 1.39 | 1.22 | 1.58  | 1.89 | 1.57 | 2.28  | 0.86 | 2.24  |
| Yang Y (63)      | 2018 | NLR | Oral cavity                      | OS  | 9  | 2373          | 1.73 | 1.52 | 1.98  | 1.71 | 1.42 | 2.06  | 1.76 | 1.32 | 2.35  | 1.07 | 2.72  |
| Yang Y (63)      | 2018 | NLR | Oral cavity                      | DFS | 10 | 1920          | 1.72 | 1.44 | 2.07  | 1.72 | 1.44 | 2.07  | 1.74 | 1.23 | 2.46  | 1.39 | 2.13  |
| Wang Y (64)      | 2018 | NLR | Oral SCC                         | OS  | 6  | 1360          | 1.56 | 1.28 | 1.9   | 1.56 | 1.27 | 1.91  | 1.39 | 1.04 | 1.86  | 1.17 | 2.09  |
| Wang Y (64)      | 2018 | NLR | Oral SCC                         | DFS | 6  | 1161          | 1.94 | 1.47 | 12.55 | 1.94 | 1.47 | 12.55 | 1.74 | 1.23 | 2.46  | 1.31 | 2.86  |
| Yang L (33)      | 2019 | NLR | Oropharynx                       | DFS | 3  | x             | 1.68 | 1.23 | 2.30  | 1.68 | 1.23 | 2.3   | 1.72 | 1.04 | 2.85  | 0.22 | 12.83 |
| Zhou Q (65)      | 2017 | NLR | Ovarian                          | PFS | 12 | 3884          | 1.08 | 1.05 | 1.11  | 1.58 | 1.26 | 1.98  | 1.25 | 1.05 | 1.48  | 0.72 | 3.43  |
| Zhou Q (65)      | 2017 | NLR | Ovarian                          | OS  | 16 | 4910          | 1.11 | 1.07 | 1.14  | 1.65 | 1.29 | 2.11  | 1.19 | 0.94 | 1.5   | 0.65 | 4.15  |
| Zhou Y (66)      | 2018 | NLR | Pancreatic                       | OS  | 43 | NA†           | 1.35 | 1.3  | 1.41  | 1.81 | 1.59 | 2.05  | 1.24 | 1.01 | 1.52  | 0.89 | 3.68  |
| Zhou Y (66)      | 2018 | NLR | Pancreatic                       | DFS | 8  | 1236          | 1.58 | 1.31 | 1.91  | 1.66 | 1.16 | 2.38  | 0.87 | 0.57 | 1.35  | 0.54 | 5.07  |
| Yang JJ (67)     | 2015 | NLR | Pancreatic                       | CSS | 3  | 845 (387/458) | 1.43 | 1.21 | 1.69  | 1.66 | 1.09 | 2.53  | 1.24 | 1.01 | 1.51  | 0.01 | 224.5 |
| Mowbray N (68)   | 2018 | NLR | Pancreatic (SR)                  | OS  | 8  | 1519          | 1.72 | 1.48 | 2     | 1.72 | 1.48 | 2     | 1.66 | 1.12 | 2.46  | 1.42 | 2.08  |
| Zhou Y (69)      | 2018 | NLR | Pancreatic Neuroendocrine Tumour | OS  | 2  | 223           | 4.21 | 1.95 | 9.13  | 4.21 | 1.95 | 9.13  | 3.6  | 133  | 9.71  | NA   | NA    |
| Zhou Y (69)      | 2018 | NLR | Pancreatic Neuroendocrine Tumour | RFS | 2  | 223           | 5.37 | 2.14 | 13.46 | 5.37 | 2.14 | 13.46 | 4.52 | 1.05 | 19.46 | NA   | NA    |
| Guo J (70)       | 2018 | NLR | Prostate                         | PFS | 7  | 1088          | 1.95 | 1.53 | 2.48  | 1.97 | 1.49 | 2.62  | 3.09 | 1.64 | 5.82  | 1.06 | 3.69  |
| Cao J (71)       | 2016 | NLR | Prostate                         | OS  | 16 | 15298         | 1.36 | 1.28 | 1.43  | 1.49 | 1.33 | 1.67  | 1.12 | 1.00 | 1.26  | 1.01 | 2.20  |
| Guo J (70)       | 2018 | NLR | Prostate (Metastatic)            | OS  | 8  | 2152          | 1.53 | 1.35 | 1.74  | 1.67 | 1.38 | 2.02  | 1.27 | 1.05 | 1.54  | 1.04 | 2.69  |
| Cao J (71)       | 2016 | NLR | Prostate CR                      | PFS | 6  | 1629          | 1.49 | 1.31 | 1.69  | 1.71 | 1.29 | 2.26  | 1.42 | 1.15 | 1.76  | 0.78 | 3.74  |
| Yin X (72)       | 2016 | NLR | Prostate CR                      | OS  | 9  | 2765          | 1.56 | 1.42 | 1.72  | 1.56 | 1.42 | 1.72  | 1.55 | 1.32 | 1.83  | 1.39 | 1.75  |
| Yin X (72)       | 2016 | NLR | Prostate Localised               | OS  | 2  | 8765          | 1.15 | 1.02 | 1.29  | 1.45 | 0.77 | 2.71  | 1.12 | 1    | 1.26  | NA   | NA    |
| Guan Y (73)      | 2020 | NLR | Prostate CR (Abitaterone)        | OS  | 10 | 1626          | 1.63 | 1.43 | 1.86  | 1.75 | 1.44 | 2.13  | 1.21 | 0.96 | 1.54  | 1.03 | 2.96  |
| Guan Y (73)      | 2020 | NLR | Prostate CR (Abitaterone)        | PFS | 2  | 198           | 1.74 | 1.22 | 2.49  | 1.62 | 0.81 | 3.26  | 2.25 | 1.44 | 3.51  | NA   | NA    |

|                        |      |     |                                 |     |    |                             |      |      |       |      |      |       |      |      |      |             |             |
|------------------------|------|-----|---------------------------------|-----|----|-----------------------------|------|------|-------|------|------|-------|------|------|------|-------------|-------------|
| Guan Y (73)            | 2020 | NLR | Prostate CR (Enzalutamide)      | OS  | 5  | 1518                        | 1.39 | 1.29 | 1.51  | 1.48 | 1.26 | 1.76  | 1.45 | 1.22 | 1.75 | 0.86        | 2.56        |
| Guan Y (73)            | 2020 | NLR | Prostate CR (Enzalutamide)      | PFS | 2  | 427                         | 1.37 | 1.22 | 1.55  | 1.55 | 0.98 | 2.44  | 1.98 | 1.54 | 2.56 | NA          | NA          |
| Cao J (71)             | 2016 | NLR | Prostate Localised              | RFS | 7  | 11745                       | 1.26 | 1.13 | 1.40  | 1.56 | 1.03 | 2.36  | 1.02 | 0.85 | 1.22 | 0.391304919 | 6.201755201 |
| Dong YW (74)           | 2016 | NLR | Rectal                          | OS  | 6  | 857                         | 14   | 3.65 | 53.75 | 14   | 3.65 | 53.75 | 29.4 | 3.7  | 6317 | 2.08        | 94.14       |
| Dong YW (74)           | 2016 | NLR | Rectal                          | DFS | 3  | 403                         | 4.27 | 1.93 | 9.45  | 4.27 | 1.93 | 9.45  | 3.91 | 2.32 | 9.15 | 0.02        | 731.37      |
| Dong YW (74)           | 2016 | NLR | Rectal                          | RFS | 3  | 433                         | 3.6  | 1.48 | 8.78  | 3.6  | 1.48 | 8.78  | 2.92 | 1.7  | 8.74 | 0.01        | 1167.53     |
| Na N (75)              | 2016 | NLR | Renal                           | PFS | 8  | 1115 <sup>†</sup>           | 1.21 | 1.13 | 1.29  | 2.07 | 1.47 | 2.92  | 1.54 | 1.17 | 2.04 | 0.71        | 6           |
| Luo Y (76)             | 2015 | NLR | Renal                           | OS  | 14 | 3373                        | 1.79 | 1.61 | 2     | 1.92 | 1.63 | 2.27  | 1.78 | 1.45 | 2.19 | 1.23        | 3.01        |
| Luo Y (76)             | 2015 | NLR | Renal                           | RFS | 3  | 700                         | 1.97 | 1.37 | 2.84  | 1.98 | 1.36 | 2.89  | 3.07 | 1.37 | 6.88 | 0.14        | 28.06       |
| Luo Y (76)             | 2015 | NLR | Renal                           | CSS | 4  | 1728                        | 1.2  | 1.07 | 1.35  | 1.38 | 0.98 | 1.95  | 2.06 | 1.57 | 2.7  | 0.3         | 6.36        |
| Shen M (3)             | 2014 | IN  | Renal                           | OS  | 2  | 206                         | 2.71 | 1.9  | 3.86  | 2.71 | 1.9  | 3.86  | 3.1  | 1.9  | 5    | NA          | NA          |
| Semeniuk-Wojtas A (77) | 2018 | NLR | Renal (TKI)                     | OS  | 7  | NA <sup>†</sup>             | 2.04 | 1.72 | 2.43  | 2.14 | 1.66 | 2.76  | 1.39 | 1.02 | 1.89 | 1.11        | 4.12        |
| Semeniuk-Wojtas A (77) | 2018 | NLR | Renal (TKI)                     | PFS | 6  | NA <sup>†</sup>             | 1.19 | 1.11 | 1.27  | 1.98 | 1.31 | 3.01  | 1.11 | 1.04 | 1.19 | 0.51        | 7.69        |
| Boissier R (78)        | 2017 | NLR | Renal Advanced                  | OS  | 7  | 1304 (331/337) <sup>†</sup> | 1.55 | 1.36 | 1.76  | 1.91 | 1.44 | 2.53  | 1.91 | 1.35 | 2.69 | 0.81        | 4.47        |
| Boissier R (78)        | 2017 | NLR | Renal Advanced                  | PFS | 3  | 306 (143/163)               | 3.19 | 2.23 | 4.57  | 3.19 | 2.23 | 4.57  | 3.5  | 2.03 | 6.03 | 0.31        | 32.69       |
| Boissier R (78)        | 2017 | NLR | Renal Localised                 | OS  | 3  | 1168 (403/651) <sup>†</sup> | 1.02 | 1.01 | 1.03  | 1.46 | 0.85 | 2.5   | 1.02 | 1.01 | 1.03 | 0           | 683.18      |
| Boissier R (78)        | 2017 | NLR | Renal Localised                 | RFS | 6  | 1962 (487/817) <sup>†</sup> | 1.01 | 1    | 1.02  | 1.67 | 1.13 | 2.45  | 1.01 | 1    | 1.02 | 0.48        | 5.82        |
| Li LQ (79)             | 2020 | NLR | STS                             | DFS | 7  | 1239                        | 1.72 | 1.43 | 2.08  | 1.72 | 1.43 | 2.08  | 1.63 | 1.28 | 2.08 | 1.35        | 2.20        |
| Liu G (80)             | 2018 | NLR | STS                             | OS  | 13 | 2658 <sup>*</sup>           | 1.18 | 1.10 | 1.27  | 1.56 | 1.3  | 1.88  | 1.80 | 1.25 | 2.60 | 0.88        | 2.77        |
| Li LQ (79)             | 2020 | NLR | STS (Synovial Sarcoma)          | OS  | 3  | NA <sup>†</sup>             | 2.39 | 1.89 | 3.02  | 2.39 | 1.89 | 3.02  | 2.97 | 1.17 | 7.51 | 0.52        | 10.89       |
| Li LQ (79)             | 2020 | NLR | STS (Liposarcoma)               | OS  | 2  | NA <sup>†</sup>             | 2.94 | 1.81 | 4.77  | 2.94 | 1.81 | 4.77  | 2.91 | 1.65 | 5.12 |             |             |
| Feng J (81)            | 2020 | NLR | Thyroid                         | DFS | 7  | 6343                        | 1.21 | 1.02 | 1.44  | 1.85 | 0.93 | 3.65  | 2.96 | 1.08 | 8.09 | 0.24        | 14.09       |
| Luo Y (76)             | 2015 | NLR | Upper Urinary                   | RFS | 2  | 802                         | 1.47 | 1.11 | 1.95  | 1.5  | 1.07 | 2.08  | 1.38 | 1.02 | 1.87 | NA          | NA          |
| Wei Y (82)             | 2014 | NLR | Urinary                         | OS  | 13 | 3391                        | 1.55 | 1.38 | 1.73  | 1.83 | 1.48 | 2.26  | 1.19 | 0.8  | 1.77 | 0.95        | 3.54        |
| Su S (83)              | 2019 | NLR | Urothelial                      | OS  | 7  | 2554                        | 1.24 | 1.16 | 1.34  | 1.32 | 1.03 | 1.69  | 1.91 | 0.35 | 4.05 | 0.65        | 2.66        |
| Su S (83)              | 2019 | NLR | Urothelial                      | DFS | 2  | 400                         | 1.38 | 1.02 | 1.86  | 1.44 | 0.89 | 2.34  | 1.91 | 1.15 | 3.17 |             |             |
| Vartolomei MD (84)     | 2018 | NLR | Urothelial                      | RFS | 6  | 3563                        | 1.26 | 1.09 | 1.45  | 1.61 | 1.16 | 2.22  | 1.05 | 0.87 | 1.26 | 0.62        | 4.14        |
| Suh J (9)              | 2019 | NLR | Urothelial (Chemotherapy)       | OS  | 5  | 1664                        | 1.39 | 1.27 | 1.52  | 1.45 | 1.27 | 1.65  | 1.46 | 1.17 | 1.83 | 1.02        | 2.07        |
| Suh J (9)              | 2019 | NLR | Urothelial (Chemotherapy)       | PFS | 2  | 500                         | 1.23 | 1.10 | 1.37  | 1.3  | 1.02 | 1.64  | 1.51 | 1.16 | 1.97 |             |             |
| Suh J (9)              | 2019 | NLR | Urothelial (Nephroureterectomy) | OS  | 3  | 1103                        | 1.72 | 1.31 | 2.25  | 1.72 | 1.31 | 2.25  | 1.58 | 1.12 | 2.23 | 0.30        | 9.91        |
| Suh J (9)              | 2019 | NLR | Urothelial (Nephroureterectomy) | PFS | 8  | 4411                        | 1.30 | 1.13 | 1.50  | 1.63 | 1.22 | 2.18  | 1.05 | 0.87 | 1.27 | 0.73        | 3.64        |
| Suh J (9)              | 2019 | NLR | Urothelial (Radical Cystectomy) | CSS | 9  | 6974                        | 1.06 | 1.04 | 1.09  | 1.53 | 1.18 | 1.97  | 1.20 | 1.10 | 1.31 | 0.66        | 3.56        |
| Suh J (9)              | 2019 | NLR | Urothelial (Radical Cystectomy) | OS  | 10 | 7049                        | 1.04 | 1.02 | 1.06  | 1.51 | 1.15 | 1.98  | 1.10 | 1.02 | 1.18 | 0.60        | 3.84        |
| Suh J (9)              | 2019 | NLR | Urothelial (Radical Cystectomy) | PFS | 5  | 5935                        | 1.06 | 1.03 | 1.09  | 1.18 | 1.01 | 1.37  | 1.20 | 1.10 | 1.31 | 0.69        | 2.01        |
| Mori K (85)            | 2020 | NLR | UTUC (Nephroureterectomy)       | CSS | 12 | 6350                        | 1.46 | 1.29 | 1.66  | 1.64 | 1.34 | 2.02  | 1.07 | 0.87 | 1.31 | 0.96        | 2.83        |
| Mori K (86)            | 2020 | NLR | UTUC (Radical Cystectomy)       | CSS | 12 | 11158                       | 1.07 | 1.05 | 1.09  | 1.29 | 1.13 | 1.47  | 1.20 | 1.20 | 1.40 | 0.85        | 1.95        |

(NA) Not Applicable, (HR), Hazard ratio, (NLR) Neutrophil to Lymphocyte Ratio, (IN) Intratumoural Neutrophils, (PN) Peritumoural Neutrophils, (SN) Stromal Neutrophils, (OS) Overall Survival, (DFS) Disease-Free Survival, (PFS) Progression-Free Survival, (RFS) Recurrence-Free Survival, (CSS) Cancer Specific Survival, (VEGFR) Vascular Endothelial Growth Factor Receptor, (PC) Palliative Chemotherapy, (SBR) Surgical Bowel Resection, (SR) Surgical Resection, (CLM) Colorectal Liver Metastasis, (NS) Non-surgical, (HCC) Hepatocellular Carcinoma, (ICC) Intrahepatic Cholangiocarcinoma, (RFA) Radiofrequency Ablation, (TACE) Trans-Arterial Chemoembolization, (MPM) Malignant Pleural Mesothelioma, (NSCLC) Non-Small Cell Lung Cancer, (NHC), Neck and Head Cancer, (CR) Castration Resistant, (TKI) Tyrosine Kinase Inhibitor. \*All cancers are defined as a grouping of cancer diagnosis unrelated to site, stage or treatment unless otherwise specified. †review reported incomplete data on sample size.

## References:

- Jiang T, Qiao M, Zhao C, et al. Pretreatment neutrophil-to-lymphocyte ratio is associated with outcome of advanced-stage cancer patients treated with immunotherapy: a meta-analysis. *Cancer Immunol Immunother.* 2018;67(5):713–27.
- Mei Z, Shi L, Wang B, et al. Prognostic role of pretreatment blood neutrophil-to-lymphocyte ratio in advanced cancer survivors: A systematic review and meta-analysis of 66 cohort studies. *Cancer Treat Rev.* 2017;58:1–13.
- Shen M, Hu P, Donskov F, et al. Tumor-associated neutrophils as a new prognostic factor in cancer: a systematic review and meta-analysis. *PLoS One.* 2014;9(6):e98259.
- Paramanathan A, Saxena A, Morris DL. A systematic review and meta-analysis on the impact of pre-operative neutrophil lymphocyte ratio on long term outcomes after curative intent resection of solid tumours. *Surg Oncol.* 2014;23(1):31–9.
- Dolan RD, McSorley ST, Horgan PG, et al. The role of the systemic inflammatory response in predicting outcomes in patients with operable cancer: Systematic review and meta-analysis. *Sci Rep.* 2017;116(1):134–46.
- Tang H, Lu W, Li B, et al. Prognostic significance of neutrophil-to-lymphocyte ratio in biliary tract cancers: a systematic review and meta-analysis. *Oncotarget.* 2017;8(22):36857–68.
- Hu G, Xu F, Zhong K, et al. The prognostic role of preoperative circulating neutrophil-lymphocyte ratio in primary bladder cancer patients undergoing radical cystectomy: a meta-analysis. *World J Urol.* 2019;37(9):1817–25. doi: <https://dx.doi.org/10.1007/s00345-018-2593-z>
- Wu S, Zhao X, Wang Y, et al. Pretreatment Neutrophil-Lymphocyte Ratio as a Predictor in Bladder Cancer and Metastatic or Unresectable Urothelial Carcinoma Patients: a Pooled Analysis of Comparative Studies. *Cell Physiol Biochem.* 2018;46(4):1352–64.
- Suh J, Jung JH, Jeong CW, et al. Clinical Significance of Pre-treated Neutrophil-Lymphocyte Ratio in the Management of Urothelial Carcinoma: A Systemic Review and Meta-Analysis. *Front Oncol.* 2019;9:1365. doi: <http://dx.doi.org/10.3389/fonc.2019.01365>
- Li X, Ma X, Tang L, et al. Prognostic value of neutrophil-to-lymphocyte ratio in urothelial carcinoma of the upper urinary tract and bladder: a systematic review and meta-analysis. *Oncotarget.* 2017;
- Ethier J-L, Desautels D, Templeton A, et al. Prognostic role of neutrophil-to-lymphocyte ratio in breast cancer: a systematic review and meta-analysis. *Breast Cancer Res.* 2017;19(1):2.
- Liu X, Qu JK, Zhang J, et al. Prognostic role of pretreatment neutrophil to lymphocyte ratio in breast cancer patients. *Med (United States).* 2017;96(45):e8101. doi: 10.1097/MD.0000000000008101
- Chen J, Pan Y, He B, et al. Meta-analysis of prognostic value of inflammation parameter in breast cancer. *J Cancer Res Ther.* 2018;14(Supplement):ate of Pubaton: 01 Mar 2018.
- Duan J, Pan L, Yang M. Preoperative elevated neutrophil-to-lymphocyte ratio (NLR) and derived NLR are associated with poor prognosis in patients with breast cancer: A meta-analysis. *Medicine (Baltimore).* 2018;97(49):e13340. doi: <https://dx.doi.org/10.1097/MD.00000000000013340>
- Guo W, Lu X, Liu Q, et al. Prognostic value of neutrophil-to-lymphocyte ratio and platelet-to-lymphocyte ratio for breast cancer patients: An updated meta-analysis of 17079 individuals. *Cancer Med.* 2019;8(9):4135–48. doi: <https://dx.doi.org/10.1002/cam4.2281>
- Wu J, Chen M, Liang C, et al. Prognostic value of the pretreatment neutrophil-to-lymphocyte ratio in cervical cancer: a meta-analysis and systematic review. *Oncotarget.* 2017;8(8):13400–12.
- Zhang J, Zhang H-Y, Li J, et al. The elevated NLR, PLR and PLT may predict the prognosis of patients with colorectal cancer: a systematic review and meta-analysis. *Oncotarget.* 2017;8(40):68837–46.
- Zheng DC, Zheng C, Wu J, et al. Neutrophil-lymphocyte ratio predicts the prognosis of patients with colorectal cancer: A meta-analysis. *Int J Clin Exp Med.* 2015;9(1):78–90.
- Maliotzis G, Giacometti M, Kennedy RH, et al. The emerging role of neutrophil to lymphocyte ratio in determining colorectal cancer treatment outcomes: a systematic review and meta-analysis. *Ann Surg Oncol.* 2014;21(12):3938–46.
- Li H, Zhao Y, Zheng F. Prognostic significance of elevated preoperative neutrophil-to-lymphocyte ratio for patients with colorectal cancer undergoing curative surgery: A meta-analysis. *Medicine (Baltimore).* 2019;98(3):e14126. doi: <http://dx.doi.org/10.1097/MD.00000000000014126>
- Tang H, Li B, Zhang A, et al. Prognostic significance of neutrophil-to-lymphocyte ratio in colorectal liver metastasis: A systematic review and meta-analysis. *PLoS One.* 2016;11(7):e0159447.
- Ni L, Tao J, Xu J, et al. Prognostic values of pretreatment neutrophil - to - lymphocyte and platelet - to - lymphocyte ratios in endometrial cancer : a systematic review and meta - analysis. 2019;(0123456789). doi: 10.1007/s00404-019-05372-w
- Sun J, Chen X, Gao P, et al. Can the Neutrophil to Lymphocyte Ratio Be Used to Determine Gastric Cancer Treatment Outcomes? A Systematic Review and Meta-Analysis. *Dis Markers.* 2016;2016:7862469.
- Zhang X, Zhang W, Feng L. Prognostic significance of neutrophil lymphocyte ratio in patients with gastric cancer: a meta-analysis. *PLoS One.* 2014;9(11):e111906.
- Szor DJ, Dias AR, Pereira MA, et al. Prognostic Role of Neutrophil/Lymphocyte Ratio in Resected Gastric Cancer: A Systematic Review and Meta-analysis. *Clinics (Sao Paulo).* 2018;73:e360.
- Mellor KL, Powell AGMT, Lewis WG. Systematic Review and Meta-Analysis of the Prognostic Significance of Neutrophil-Lymphocyte Ratio (NLR) After R0 Gastrectomy for Cancer. *J Gastrointest Cancer.* 2018;49(3):237–44.

27. Zhou Y, Li D, Lin Y, et al. Pretreatment hematologic markers as prognostic predictors of gastroenteropancreatic neuroendocrine tumors: a systematic review and meta-analysis. *Onco Targets Ther.* 2018;11:2489–96.
28. Luo X-F, Zhou L-H. Prognostic significance of neutrophil to lymphocyte ratio in patients with gastrointestinal stromal tumors: A meta-analysis. *Clin Chim Acta.* 2018;477:7–12.
29. Lei Y-Y, Li Y-T, Hu Q-L, et al. Prognostic impact of neutrophil-to-lymphocyte ratio in gliomas: A systematic review and meta-analysis. *World J Surg Oncol.* 2019;17(1):152. doi: <https://dx.doi.org/10.1186/s12957-019-1686-5>
30. Ethier J-L, Desautels DN, Templeton AJ, et al. Is the neutrophil-to-lymphocyte ratio prognostic of survival outcomes in gynecologic cancers? A systematic review and meta-analysis. *Gynecol Oncol.* 2017;145(3):584–94.
31. Yu Y, Wang H, Yan A, et al. Pretreatment neutrophil to lymphocyte ratio in determining the prognosis of head and neck cancer: a meta-analysis. *BMC Cancer.* 2018;18(1):383.
32. Tham T, Bardash Y, Herman SW, et al. Neutrophil-to-lymphocyte ratio as a prognostic indicator in head and neck cancer: A systematic review and meta-analysis. *Head Neck.* 2018;(pagination):ate of Pubaton: 2018.
33. Yang L, Huang Y, Zhou L, et al. High pretreatment neutrophil-to-lymphocyte ratio as a predictor of poor survival prognosis in head and neck squamous cell carcinoma: Systematic review and meta-analysis. *Head Neck.* 2019;41(5):1525–35. doi: <https://dx.doi.org/10.1002/hed.25583>
34. Cho J-K, Kim MW, Choi IS, et al. Optimal cutoff of pretreatment neutrophil-to-lymphocyte ratio in head and neck cancer patients: a meta-analysis and validation study. *BMC Cancer.* 2018;18(1):969. doi: <https://dx.doi.org/10.1186/s12885-018-4876-6>
35. Min G-TT, Li Y-MM, Yao N, et al. The pretreatment neutrophil-lymphocyte ratio may predict prognosis of patients with liver cancer: A systematic review and meta-analysis. *Clin Transplant.* 2018;32(1):Arte Number: e13151. ate of Pubaton: January 2018.
36. Xiao W-K, Chen D, Li S-Q, et al. Prognostic significance of neutrophil-lymphocyte ratio in hepatocellular carcinoma: a meta-analysis. *BMC Cancer.* 2014;14:117.
37. Liu L, Gong Y, Zhang Q, et al. Prognostic Roles of Blood Inflammatory Markers in Hepatocellular Carcinoma Patients Taking Sorafenib. A Systematic Review and Meta-Analysis. *Front Oncol.* 2019;9:1557. doi: <https://dx.doi.org/10.3389/fonc.2019.01557>
38. Wang Y, Peng C, Cheng Z, et al. The prognostic significance of preoperative neutrophil-lymphocyte ratio in patients with hepatocellular carcinoma receiving hepatectomy: A systematic review and meta-analysis. *Int J Surg.* 2018;55:73–80.
39. Li S, Feng X, Cao G, et al. Prognostic significance of inflammatory indices in hepatocellular carcinoma treated with transarterial chemoembolization: A systematic review and meta-analysis. *PLoS One.* 2020;15(3):e0230879. doi: <https://dx.doi.org/10.1371/journal.pone.0230879>
40. Xu Z-GG, Ye C-JJ, Liu L-XX, et al. The pretransplant neutrophil-lymphocyte ratio as a new prognostic predictor after liver transplantation for hepatocellular cancer: a systematic review and meta-analysis. *Biomark Med.* 2018;12(2):189–99.
41. Tan Q, Liu S, Liang C, et al. Pretreatment hematological markers predict clinical outcome in cancer patients receiving immune checkpoint inhibitors: A meta-analysis. *Thorac Cancer.* 2018;
42. Xie X, Liu J, Yang H, et al. Prognostic Value of Baseline Neutrophil-to-Lymphocyte Ratio in Outcome of Immune Checkpoint Inhibitors. *Cancer Invest.* 2019;37(6):265–74. doi: <https://dx.doi.org/10.1080/07357907.2019.1639057>
43. Mu S, Ai L, Fan F, et al. Prognostic role of neutrophil-to-lymphocyte ratio in diffuse large B cell lymphoma patients: an updated dose-response meta-analysis. *Cancer Cell Int.* 2018;18:119.
44. Mascarella MA, Mannard E, Silva SD, et al. Neutrophil-to-lymphocyte ratio in head and neck cancer prognosis: A systematic review and meta-analysis. *Head Neck.* 2018;40(5):1091–100.
45. Zhao Q-T, Yang Y, Xu S, et al. Prognostic role of neutrophil to lymphocyte ratio in lung cancers: a meta-analysis including 7,054 patients. *Onco Targets Ther.* 2015;8:2731–8.
46. Yu Y, Qian L, Cui J. Value of neutrophil-to-lymphocyte ratio for predicting lung cancer prognosis: A meta-analysis of 7,219 patients. *Mol Clin Oncol.* 2017;7(3):498–506.
47. Zhan H, Ma J-Y, Jian Q-C. Prognostic significance of pretreatment neutrophil-to-lymphocyte ratio in melanoma patients: A meta-analysis. *Clin Chim Acta.* 2018;484:136–40. doi: 10.1016/j.cca.2018.05.055
48. Ding Y, Zhang S, Qiao J. Prognostic value of neutrophil-to-lymphocyte ratio in melanoma: Evidence from a PRISMA-compliant meta-analysis. *Medicine (Baltimore).* 2018;97(30):e11446.
49. Chen N, Liu S, Huang L, et al. Prognostic significance of neutrophil-to-lymphocyte ratio in patients with malignant pleural mesothelioma: a meta-analysis. *Oncotarget.* 2017;
50. Zeng Q, Liu Z, Li Q, et al. Prognostic value of neutrophil to lymphocyte ratio and clinicopathological characteristics for multiple myeloma: A meta-analysis. *Medicine (Baltimore).* 2018;97(41):e12678. doi: <https://dx.doi.org/10.1097/MD.00000000000012678>
51. Yang S, Zhao K, Ding X, et al. Prognostic Significance of Hematological Markers for Patients with Nasopharyngeal Carcinoma: A Meta-analysis. *J Cancer.* 2019;10(11):2568–77. doi: <https://dx.doi.org/10.7150/jca.26770>
52. Yin J, Qin Y, Luo YK, et al. Prognostic value of neutrophil-to-lymphocyte ratio for nasopharyngeal carcinoma. *Med (United States).* 2017;96(29) (pagination):Arte Number: e7577. ate of Pubaton: 01 Ju 2017.
53. Su L, Zhang M, Zhang W, et al. Pretreatment hematologic markers as prognostic factors in patients with nasopharyngeal carcinoma. *Med (United States).* 2017;96(11) (pagination):Arte Number: e6364. ate of Pubaton: 01 Mar 2017.
54. Li X, Dai D, Chen B, et al. The value of neutrophil-to-lymphocyte ratio for response and prognostic effect of neoadjuvant chemotherapy in solid tumors: A systematic review and meta-analysis. *J Cancer.* 2018;9(5):861–71.
55. Vartolomei MD, PoravHodade D, Ferro M, et al. Prognostic role of pretreatment neutrophil-to-lymphocyte ratio (NLR) in patients with non-muscle-invasive bladder cancer (NMIBC): A systematic review and meta-analysis. *Urol Oncol Semin Orig Investig.* 2018;(pagination):ate of Pubaton: 2018.
56. Lu Y, Jiang J, Yan L, et al. The clinicopathological and prognostic value of the pretreatment neutrophil-to-lymphocyte ratio in small cell lung cancer: A meta-analysis. *PLoS One.* 2020;15(4):e0230979. doi: <https://dx.doi.org/10.1371/journal.pone.0230979>
57. Gu X, Tian T, Tian X, et al. Prognostic significance of neutrophil-to-lymphocyte ratio in non-small cell lung cancer: a meta-analysis. *Sci Rep.* 2015;5:12493. doi: <http://dx.doi.org/10.1038/srep12493>



58. Wang Z, Zhan P, Lv Y, et al. Prognostic role of pretreatment neutrophil-to-lymphocyte ratio in non-small cell lung cancer patients treated with systemic therapy: A meta-analysis. *Transl lung cancer Res.* 2019;8(3):214–26. doi: <https://dx.doi.org/10.21037/tlcr.2019.06.10>
59. Cao D, Xu H, Xu X, et al. A reliable and feasible way to predict the benefits of Nivolumab in patients with non-small cell lung cancer: a pooled analysis of 14 retrospective studies. *Oncoimmunology.* 2018;(pagination):ate of Pubaton: 2018.
60. Jiang T, Bai Y, Zhou F, et al. Clinical value of neutrophil-to-lymphocyte ratio in patients with non-small-cell lung cancer treated with PD-1/PD-L1 inhibitors. *Lung Cancer.* 2019;130:76–83. doi: <https://dx.doi.org/10.1016/j.lungcan.2019.02.009>
61. Zhang X, Wang Y, Zhao L, et al. Prognostic value of platelet-to-lymphocyte ratio in oncologic outcomes of esophageal cancer: A systematic review and meta-analysis. *Int J Biol Markers.* 2018;33(4):335–44. doi: <http://dx.doi.org/10.1177/1724600818766889>
62. Pirozzolo G, Gisbertz SS, Castoro C, et al. Neutrophil-to-lymphocyte ratio as prognostic marker in esophageal cancer: A systematic review and meta-analysis. *J Thorac Dis.* 2019;11(7):3136–45. doi: <http://dx.doi.org/10.21037/jtd.2019.07.30>
63. Yang Y, Liu R, Ren F, et al. Prognostic and clinicopathological significance of neutrophil-to-lymphocyte ratio in patients with oral cancer. *Biosci Rep.* 2018;38(6). doi: <https://dx.doi.org/10.1042/BSR20181550>
64. Wang Y, Wang P, Andrukhov O, et al. Meta-analysis of the prognostic value of the neutrophil-to-lymphocyte ratio in oral squamous cell carcinoma. *J Oral Pathol Med.* 2018;47(4):353–8.
65. Zhou Q, Hong L, Zuo M-Z, et al. Prognostic significance of neutrophil to lymphocyte ratio in ovarian cancer: evidence from 4,910 patients. *Oncotarget.* 2017;8(40):68938–49.
66. Zhou Y, Cheng S, Fathy A, et al. Prognostic value of platelet-to-lymphocyte ratio in pancreatic cancer: A comprehensive meta-analysis of 17 cohort studies. *Onco Targets Ther.* 2018;11:1899–908. doi: <http://dx.doi.org/10.2147/OTT.S154162>
67. Yang J, Hu Z, Shi W, et al. Prognostic significance of neutrophil to lymphocyte ratio in pancreatic cancer: A meta-analysis. *World J Gastroenterol.* 2015;21(9):2807–15. doi: <http://dx.doi.org/10.3748/wjg.v21.i9.2807>
68. Mowbray NG, Griffith D, Hammada M, et al. A meta-analysis of the utility of the neutrophil-to-lymphocyte ratio in predicting survival after pancreatic cancer resection. *HPB.* 2018;20(5):379–84.
69. Zhou Y, Li D, Lin Y, et al. Pretreatment hematologic markers as prognostic predictors of gastroenteropancreatic neuroendocrine tumors: A systematic review and meta-analysis. *Onco Targets Ther.* 2018;11:2489–96.
70. Guo J, Fang J, Huang X, et al. Prognostic role of neutrophil to lymphocyte ratio and platelet to lymphocyte ratio in prostate cancer: A meta-analysis of results from multivariate analysis. *Int J Surg.* 2018;60:216–23. doi: <https://dx.doi.org/10.1016/j.ijso.2018.11.020>
71. Cao J, Zhu X, Zhao X, et al. Neutrophil-to-Lymphocyte Ratio Predicts PSA Response and Prognosis in Prostate Cancer: A Systematic Review and Meta-Analysis. *PLoS One.* 2016;11(7):e0158770.
72. Yin X, Xiao Y, Li F, et al. Prognostic Role of Neutrophil-to-Lymphocyte Ratio in Prostate Cancer: A Systematic Review and Meta-analysis. *Medicine (Baltimore).* 2016;95(3):e2544. doi: 10.1097/MD.0000000000002544
73. Guan Y, Xiong H, Feng Y, et al. Revealing the prognostic landscape of neutrophil-to-lymphocyte ratio and platelet-to-lymphocyte ratio in metastatic castration-resistant prostate cancer patients treated with abiraterone or enzalutamide: a meta-analysis. *Prostate Cancer Prostatic Dis.* 2020;23(2):220–31. doi: <https://dx.doi.org/10.1038/s41391-020-0209-3>
74. Dong YW, Shi YQ, He LW, et al. Prognostic significance of neutrophil-to-lymphocyte ratio in rectal cancer: A meta-analysis. *Onco Targets Ther.* 2016;9:3127–34. doi: 10.2147/OTT.S103031
75. Na N, Yao J, Cheng C, et al. Meta-analysis of the efficacy of the pretreatment neutrophil-to-lymphocyte ratio as a predictor of prognosis in renal carcinoma patients receiving tyrosine kinase inhibitors. *Oncotarget.* 2016;7(28):44039–46.
76. Luo Y, She D-L, Xiong H, et al. Pretreatment Neutrophil to Lymphocyte Ratio as a Prognostic Predictor of Urologic Tumors: A Systematic Review and Meta-Analysis. *Medicine (Baltimore).* 2015;94(40):e1670.
77. Semeniuk-Wojtas A, Lubas A, Stec R, et al. Neutrophil-to-lymphocyte Ratio, Platelet-to-lymphocyte Ratio, and C-reactive Protein as New and Simple Prognostic Factors in Patients With Metastatic Renal Cell Cancer Treated With Tyrosine Kinase Inhibitors: A Systemic Review and Meta-analysis. *Clin Genitourin Cancer.* 2018;16(3):e693.
78. Boissier R, Campagna J, Branger N, et al. The prognostic value of the neutrophil-lymphocyte ratio in renal oncology: A review. *Urol Oncol.* 2017;35(4):135–41.
79. Li L, Bai Z, Zhang L, et al. Meta-Analysis of Hematological Biomarkers as Reliable Indicators of Soft Tissue Sarcoma Prognosis. 2020;10(January):1–12. doi: 10.3389/fonc.2020.00030
80. Liu G, Ke L-CC, Sun S-RR. Prognostic value of pretreatment neutrophil-to-lymphocyte ratio in patients with soft tissue sarcoma: A meta-analysis. *Medicine (Baltimore).* 2018;97(36):e12176.
81. Feng J, Wang Y, Shan G, et al. Clinical and prognostic value of neutrophil-lymphocyte ratio for patients with thyroid cancer: A meta-analysis. *Medicine (Baltimore).* 2020;99(20):e19686. doi: <http://dx.doi.org/10.1097/MD.00000000000019686>
82. Wei Y, Jiang Y-Z, Qian W-H. Prognostic role of NLR in urinary cancers: a meta-analysis. *PLoS One.* 2014;9(3):e92079.
83. Su S, Liu L, Li C, et al. Prognostic role of pretreatment derived neutrophil to lymphocyte ratio in urological cancers: A systematic review and meta-analysis. *Int J Surg.* 2019;72:146–53. doi: <https://dx.doi.org/10.1016/j.ijso.2019.10.043>
84. Vartolomei MD, Kimura S, Ferro M, et al. Is neutrophil-to-lymphocytes ratio a clinical relevant preoperative biomarker in upper tract urothelial carcinoma? A meta-analysis of 4385 patients. *World J Urol.* 2018;36(7):1019–29.
85. Mori K, Janisch F, Mostafaei H, et al. Prognostic value of preoperative blood-based biomarkers in upper tract urothelial carcinoma treated with nephroureterectomy: A systematic review and meta-analysis. *Urol Oncol.* 2020;38(5):315–33. doi: <http://dx.doi.org/10.1016/j.urolonc.2020.01.015>
86. Mori K, Miura N, Mostafaei H, et al. Prognostic value of preoperative hematologic biomarkers in urothelial carcinoma of the bladder treated with radical cystectomy: a systematic review and meta-analysis. *Int J Clin Oncol.* 2020; doi: <https://dx.doi.org/10.1007/s10147-020-01690-1>
